# Supplementary material for: Evolution of transcript modification by N6-methyladenosine in primates
Source: HighWire-hosted journal article supplement (doi:10.1101/gr.212563.116), 2017-01-04
Supplement: Supplemental_Table_S1.xlsx [file Supplemental_Table_S1.xlsx]

## Sheet: sTable1.H1Peaks
GID	Symbol	Description	RefSeq_NM	Start	End	Strand
35	ACADS	acyl-CoA dehydrogenase, C-2 to C-3 short chain	NM_000017	1291	1480	+
38	ACAT1	acetyl-CoA acetyltransferase 1	NM_000019	661	930	+
5663	PSEN1	presenilin 1	NM_000021	1221	1340	+
5663	PSEN1	presenilin 1	NM_000021	1631	2257	+
158	ADSL	adenylosuccinate lyase	NM_000026	1421	1541	+
178	AGL	amylo-alpha-1, 6-glucosidase, 4-alpha-glucanotransferase	NM_000028	4121	4430	+
178	AGL	amylo-alpha-1, 6-glucosidase, 4-alpha-glucanotransferase	NM_000028	7321	7440	+
355	FAS	Fas cell surface death receptor	NM_000043	1111	1425	+
472	ATM	ATM serine/threonine kinase	NM_000051	221	350	+
472	ATM	ATM serine/threonine kinase	NM_000051	531	740	+
472	ATM	ATM serine/threonine kinase	NM_000051	4221	4380	+
472	ATM	ATM serine/threonine kinase	NM_000051	6361	6630	+
472	ATM	ATM serine/threonine kinase	NM_000051	7171	7310	+
472	ATM	ATM serine/threonine kinase	NM_000051	9342	9647	+
472	ATM	ATM serine/threonine kinase	NM_000051	12547	12775	+
538	ATP7A	ATPase, Cu++ transporting, alpha polypeptide	NM_000052	341	720	+
538	ATP7A	ATPase, Cu++ transporting, alpha polypeptide	NM_000052	1221	1432	+
538	ATP7A	ATPase, Cu++ transporting, alpha polypeptide	NM_000052	4463	4790	+
538	ATP7A	ATPase, Cu++ transporting, alpha polypeptide	NM_000052	5041	5230	+
1371	CPOX	coproporphyrinogen oxidase	NM_000097	1	140	+
1371	CPOX	coproporphyrinogen oxidase	NM_000097	297	813	+
1371	CPOX	coproporphyrinogen oxidase	NM_000097	1311	1500	+
1376	CPT2	carnitine palmitoyltransferase 2	NM_000098	1331	1560	+
1545	CYP1B1	cytochrome P450, family 1, subfamily B, polypeptide 1	NM_000104	1051	1360	+
1545	CYP1B1	cytochrome P450, family 1, subfamily B, polypeptide 1	NM_000104	1612	1911	+
1545	CYP1B1	cytochrome P450, family 1, subfamily B, polypeptide 1	NM_000104	1912	2042	+
1545	CYP1B1	cytochrome P450, family 1, subfamily B, polypeptide 1	NM_000104	2421	2617	+
1545	CYP1B1	cytochrome P450, family 1, subfamily B, polypeptide 1	NM_000104	3791	4027	+
1643	DDB2	damage-specific DNA binding protein 2, 48kDa	NM_000107	106	340	+
1643	DDB2	damage-specific DNA binding protein 2, 48kDa	NM_000107	1431	1831	+
1738	DLD	dihydrolipoamide dehydrogenase	NM_000108	41	200	+
1738	DLD	dihydrolipoamide dehydrogenase	NM_000108	1401	1550	+
1738	DLD	dihydrolipoamide dehydrogenase	NM_000108	1698	1899	+
1861	TOR1A	torsin family 1, member A (torsin A)	NM_000113	941	1120	+
6901	TAZ	tafazzin	NM_000116	1201	1400	+
2071	ERCC3	excision repair cross-complementation group 3	NM_000122	21	120	+
2071	ERCC3	excision repair cross-complementation group 3	NM_000122	161	420	+
2071	ERCC3	excision repair cross-complementation group 3	NM_000122	621	760	+
2073	ERCC5	excision repair cross-complementation group 5	NM_000123	1541	2120	+
2073	ERCC5	excision repair cross-complementation group 5	NM_000123	3401	3740	+
2073	ERCC5	excision repair cross-complementation group 5	NM_000123	3971	4076	+
2074	ERCC6	excision repair cross-complementation group 6	NM_000124	1101	1640	+
2074	ERCC6	excision repair cross-complementation group 6	NM_000124	3411	3620	+
2074	ERCC6	excision repair cross-complementation group 6	NM_000124	3691	3926	+
2074	ERCC6	excision repair cross-complementation group 6	NM_000124	4413	4704	+
2108	ETFA	electron-transfer-flavoprotein, alpha polypeptide	NM_000126	21	120	+
2184	FAH	fumarylacetoacetate hydrolase (fumarylacetoacetase)	NM_000137	961	1110	+
2200	FBN1	fibrillin 1	NM_000138	8821	8930	+
2271	FH	fumarate hydratase	NM_000143	1401	1591	+
2512	FTL	ferritin, light polypeptide	NM_000146	751	870	+
2517	FUCA1	fucosidase, alpha-L- 1, tissue	NM_000147	1355	1860	+
2517	FUCA1	fucosidase, alpha-L- 1, tissue	NM_000147	1961	2060	+
2639	GCDH	glutaryl-CoA dehydrogenase	NM_000159	1471	1570	+
2643	GCH1	GTP cyclohydrolase 1	NM_000161	41	180	+
2717	GLA	galactosidase, alpha	NM_000169	1201	1381	+
2731	GLDC	glycine dehydrogenase (decarboxylating)	NM_000170	17	200	+
2731	GLDC	glycine dehydrogenase (decarboxylating)	NM_000170	3201	3420	+
2937	GSS	glutathione synthetase	NM_000178	8	230	+
2937	GSS	glutathione synthetase	NM_000178	1721	1898	+
2956	MSH6	mutS homolog 6	NM_000179	741	1090	+
2956	MSH6	mutS homolog 6	NM_000179	1353	1714	+
2956	MSH6	mutS homolog 6	NM_000179	2823	3360	+
2990	GUSB	glucuronidase, beta	NM_000181	106	210	+
2990	GUSB	glucuronidase, beta	NM_000181	611	750	+
2990	GUSB	glucuronidase, beta	NM_000181	2021	2290	+
3030	HADHA	hydroxyacyl-CoA dehydrogenase/3-ketoacyl-CoA thiolase/enoyl-CoA hydratase (trifunctional protein), alpha subunit	NM_000182	781	1130	+
3030	HADHA	hydroxyacyl-CoA dehydrogenase/3-ketoacyl-CoA thiolase/enoyl-CoA hydratase (trifunctional protein), alpha subunit	NM_000182	2621	2802	+
3099	HK2	hexokinase 2	NM_000189	4561	4990	+
3099	HK2	hexokinase 2	NM_000189	5361	5460	+
3099	HK2	hexokinase 2	NM_000189	5691	5970	+
3155	HMGCL	3-hydroxymethyl-3-methylglutaryl-CoA lyase	NM_000191	37	150	+
3155	HMGCL	3-hydroxymethyl-3-methylglutaryl-CoA lyase	NM_000191	988	1308	+
3155	HMGCL	3-hydroxymethyl-3-methylglutaryl-CoA lyase	NM_000191	1309	1596	+
6448	SGSH	N-sulfoglucosamine sulfohydrolase	NM_000199	1731	1860	+
3383	ICAM1	intercellular adhesion molecule 1	NM_000201	1781	2409	+
3383	ICAM1	intercellular adhesion molecule 1	NM_000201	2601	2790	+
3423	IDS	iduronate 2-sulfatase	NM_000202	1314	1802	+
3423	IDS	iduronate 2-sulfatase	NM_000202	4241	4480	+
3423	IDS	iduronate 2-sulfatase	NM_000202	4591	4700	+
3561	IL2RG	interleukin 2 receptor, gamma	NM_000206	1401	1503	+
3643	INSR	insulin receptor	NM_000208	251	760	+
3643	INSR	insulin receptor	NM_000208	841	990	+
3643	INSR	insulin receptor	NM_000208	3969	4299	+
3643	INSR	insulin receptor	NM_000208	4541	4730	+
3643	INSR	insulin receptor	NM_000208	4961	5552	+
3643	INSR	insulin receptor	NM_000208	5631	6174	+
3689	ITGB2	integrin, beta 2 (complement component 3 receptor 3 and 4 subunit)	NM_000211	131	270	+
3689	ITGB2	integrin, beta 2 (complement component 3 receptor 3 and 4 subunit)	NM_000211	2621	2948	+
3718	JAK3	Janus kinase 3	NM_000215	1601	1790	+
3718	JAK3	Janus kinase 3	NM_000215	5211	5360	+
3978	LIG1	ligase I, DNA, ATP-dependent	NM_000234	391	600	+
3978	LIG1	ligase I, DNA, ATP-dependent	NM_000234	851	1180	+
3988	LIPA	lipase A, lysosomal acid, cholesterol esterase	NM_000235	211	360	+
3988	LIPA	lipase A, lysosomal acid, cholesterol esterase	NM_000235	1271	1651	+
4292	MLH1	mutL homolog 1	NM_000249	721	880	+
4292	MLH1	mutL homolog 1	NM_000249	1381	1740	+
4436	MSH2	mutS homolog 2	NM_000251	3081	3200	+
4548	MTR	5-methyltetrahydrofolate-homocysteine methyltransferase	NM_000254	4513	4794	+
4548	MTR	5-methyltetrahydrofolate-homocysteine methyltransferase	NM_000254	5341	5470	+
4548	MTR	5-methyltetrahydrofolate-homocysteine methyltransferase	NM_000254	5671	5950	+
4548	MTR	5-methyltetrahydrofolate-homocysteine methyltransferase	NM_000254	6251	6500	+
4548	MTR	5-methyltetrahydrofolate-homocysteine methyltransferase	NM_000254	7501	7780	+
4548	MTR	5-methyltetrahydrofolate-homocysteine methyltransferase	NM_000254	7841	7990	+
4594	MUT	methylmalonyl CoA mutase	NM_000255	441	630	+
4644	MYO5A	myosin VA (heavy chain 12, myoxin)	NM_000259	3201	3470	+
4644	MYO5A	myosin VA (heavy chain 12, myoxin)	NM_000259	3711	3900	+
4644	MYO5A	myosin VA (heavy chain 12, myoxin)	NM_000259	4211	4370	+
4644	MYO5A	myosin VA (heavy chain 12, myoxin)	NM_000259	5711	5960	+
4668	NAGA	N-acetylgalactosaminidase, alpha-	NM_000262	1981	2270	+
653361	NCF1	neutrophil cytosolic factor 1	NM_000265	441	610	+
4860	PNP	purine nucleoside phosphorylase	NM_000270	51	160	+
4860	PNP	purine nucleoside phosphorylase	NM_000270	1331	1494	+
4864	NPC1	Niemann-Pick disease, type C1	NM_000271	1471	1830	+
4864	NPC1	Niemann-Pick disease, type C1	NM_000271	3971	4512	+
5190	PEX6	peroxisomal biogenesis factor 6	NM_000287	561	1030	+
5230	PGK1	phosphoglycerate kinase 1	NM_000291	1771	1871	+
5256	PHKA2	phosphorylase kinase, alpha 2 (liver)	NM_000292	4271	4570	+
5261	PHKG2	phosphorylase kinase, gamma 2 (testis)	NM_000294	1221	1697	+
5311	PKD2	polycystic kidney disease 2 (autosomal dominant)	NM_000297	2651	3010	+
5351	PLOD1	procollagen-lysine, 2-oxoglutarate 5-dioxygenase 1	NM_000302	281	460	+
5351	PLOD1	procollagen-lysine, 2-oxoglutarate 5-dioxygenase 1	NM_000302	2201	2880	+
5621	PRNP	prion protein	NM_000311	461	1010	+
5621	PRNP	prion protein	NM_000311	1321	1470	+
5728	PTEN	phosphatase and tensin homolog	NM_000314	571	710	+
5728	PTEN	phosphatase and tensin homolog	NM_000314	1321	1520	+
5728	PTEN	phosphatase and tensin homolog	NM_000314	2151	2382	+
5925	RB1	retinoblastoma 1	NM_000321	1261	1510	+
5925	RB1	retinoblastoma 1	NM_000321	1861	2130	+
5925	RB1	retinoblastoma 1	NM_000321	2511	3040	+
6310	ATXN1	ataxin 1	NM_000332	811	1020	+
6310	ATXN1	ataxin 1	NM_000332	1091	1220	+
6310	ATXN1	ataxin 1	NM_000332	3043	3490	+
6310	ATXN1	ataxin 1	NM_000332	4701	4950	+
6310	ATXN1	ataxin 1	NM_000332	6421	6770	+
6314	ATXN7	ataxin 7	NM_000333	2511	3510	+
6606	SMN1	survival of motor neuron 1, telomeric	NM_000344	1161	1404	+
6662	SOX9	SRY (sex determining region Y)-box 9	NM_000346	2008	2276	+
412	STS	steroid sulfatase (microsomal), isozyme S	NM_000351	1761	2140	+
7248	TSC1	tuberous sclerosis 1	NM_000368	2041	2140	+
7248	TSC1	tuberous sclerosis 1	NM_000368	3491	4000	+
7372	UMPS	uridine monophosphate synthetase	NM_000373	431	1110	+
7372	UMPS	uridine monophosphate synthetase	NM_000373	1451	1580	+
7389	UROD	uroporphyrinogen decarboxylase	NM_000374	106	280	+
7454	WAS	Wiskott-Aldrich syndrome	NM_000377	19	130	+
7454	WAS	Wiskott-Aldrich syndrome	NM_000377	1671	1788	+
642	BLMH	bleomycin hydrolase	NM_000386	1598	1919	+
642	BLMH	bleomycin hydrolase	NM_000386	2401	2530	+
788	SLC25A20	solute carrier family 25 (carnitine/acylcarnitine translocase), member 20	NM_000387	1074	1350	+
788	SLC25A20	solute carrier family 25 (carnitine/acylcarnitine translocase), member 20	NM_000387	1541	1851	+
1121	CHM	choroideremia (Rab escort protein 1)	NM_000390	521	711	+
1121	CHM	choroideremia (Rab escort protein 1)	NM_000390	1871	2228	+
1200	TPP1	tripeptidyl peptidase I	NM_000391	45	150	+
1200	TPP1	tripeptidyl peptidase I	NM_000391	1841	1970	+
1200	TPP1	tripeptidyl peptidase I	NM_000391	2111	2330	+
1200	TPP1	tripeptidyl peptidase I	NM_000391	2571	2710	+
1200	TPP1	tripeptidyl peptidase I	NM_000391	2841	3041	+
1536	CYBB	cytochrome b-245, beta polypeptide	NM_000397	41	140	+
1536	CYBB	cytochrome b-245, beta polypeptide	NM_000397	3177	3390	+
1959	EGR2	early growth response 2	NM_000399	1751	1860	+
2539	G6PD	glucose-6-phosphate dehydrogenase	NM_000402	2261	2390	+
2720	GLB1	galactosidase, beta 1	NM_000404	1616	1822	+
2720	GLB1	galactosidase, beta 1	NM_000404	1951	2223	+
2760	GM2A	GM2 ganglioside activator	NM_000405	2431	2541	+
3459	IFNGR1	interferon gamma receptor 1	NM_000416	1071	1561	+
3459	IFNGR1	interferon gamma receptor 1	NM_000416	1831	1935	+
3858	KRT10	keratin 10, type I	NM_000421	1781	1957	+
5048	PAFAH1B1	platelet-activating factor acetylhydrolase 1b, regulatory subunit 1 (45kDa)	NM_000430	18	257	+
5048	PAFAH1B1	platelet-activating factor acetylhydrolase 1b, regulatory subunit 1 (45kDa)	NM_000430	611	910	+
5048	PAFAH1B1	platelet-activating factor acetylhydrolase 1b, regulatory subunit 1 (45kDa)	NM_000430	1851	1950	+
5048	PAFAH1B1	platelet-activating factor acetylhydrolase 1b, regulatory subunit 1 (45kDa)	NM_000430	5081	5501	+
4758	NEU1	sialidase 1 (lysosomal sialidase)	NM_000434_4	1351	1580	+
4758	NEU1	sialidase 1 (lysosomal sialidase)	NM_000434_4	1751	1910	+
5019	OXCT1	3-oxoacid CoA transferase 1	NM_000436	1891	2010	+
5019	OXCT1	3-oxoacid CoA transferase 1	NM_000436	2881	3090	+
5051	PAFAH2	platelet-activating factor acetylhydrolase 2, 40kDa	NM_000437	1431	1800	+
5993	RFX5	regulatory factor X, 5 (influences HLA class II expression)	NM_000449	1012	1200	+
5993	RFX5	regulatory factor X, 5 (influences HLA class II expression)	NM_000449	1421	1880	+
6794	STK11	serine/threonine kinase 11	NM_000455	711	1160	+
7337	UBE3A	ubiquitin protein ligase E3A	NM_000462	1814	2370	+
7337	UBE3A	ubiquitin protein ligase E3A	NM_000462	3301	3530	+
580	BARD1	BRCA1 associated RING domain 1	NM_000465	557	1210	+
580	BARD1	BRCA1 associated RING domain 1	NM_000465	2171	2351	+
351	APP	amyloid beta (A4) precursor protein	NM_000484	766	1036	+
351	APP	amyloid beta (A4) precursor protein	NM_000484	1381	1660	+
546	ATRX	alpha thalassemia/mental retardation syndrome X-linked	NM_000489	1271	1420	+
546	ATRX	alpha thalassemia/mental retardation syndrome X-linked	NM_000489	2401	2770	+
546	ATRX	alpha thalassemia/mental retardation syndrome X-linked	NM_000489	2791	3020	+
546	ATRX	alpha thalassemia/mental retardation syndrome X-linked	NM_000489	3091	3950	+
546	ATRX	alpha thalassemia/mental retardation syndrome X-linked	NM_000489	4131	4380	+
546	ATRX	alpha thalassemia/mental retardation syndrome X-linked	NM_000489	4461	4876	+
3949	LDLR	low density lipoprotein receptor	NM_000527	2741	3090	+
5378	PMS1	PMS1 postmeiotic segregation increased 1 (S. cerevisiae)	NM_000534	1750	2100	+
5378	PMS1	PMS1 postmeiotic segregation increased 1 (S. cerevisiae)	NM_000534	2331	2634	+
5395	PMS2	PMS2 postmeiotic segregation increased 2 (S. cerevisiae)	NM_000535	1261	1410	+
5395	PMS2	PMS2 postmeiotic segregation increased 2 (S. cerevisiae)	NM_000535	1421	1825	+
5994	RFXAP	regulatory factor X-associated protein	NM_000538	328	519	+
5994	RFXAP	regulatory factor X-associated protein	NM_000538	568	1030	+
6609	SMPD1	sphingomyelin phosphodiesterase 1, acid lysosomal	NM_000543	861	1070	+
7249	TSC2	tuberous sclerosis 2	NM_000548	4261	4450	+
7428	VHL	von Hippel-Lindau tumor suppressor, E3 ubiquitin protein ligase	NM_000551	141	240	+
7428	VHL	von Hippel-Lindau tumor suppressor, E3 ubiquitin protein ligase	NM_000551	371	510	+
7428	VHL	von Hippel-Lindau tumor suppressor, E3 ubiquitin protein ligase	NM_000551	771	940	+
7428	VHL	von Hippel-Lindau tumor suppressor, E3 ubiquitin protein ligase	NM_000551	2871	2970	+
7486	WRN	Werner syndrome, RecQ helicase-like	NM_000553	1618	2026	+
7486	WRN	Werner syndrome, RecQ helicase-like	NM_000553	4928	5169	+
6890	TAP1	transporter 1, ATP-binding cassette, sub-family B (MDR/TAP)	NM_000593_8	2621	2945	+
7124	TNF	tumor necrosis factor	NM_000594_7	1	160	+
7124	TNF	tumor necrosis factor	NM_000594_7	881	1200	+
960	CD44	CD44 molecule (Indian blood group)	NM_000610	2501	2743	+
3588	IL10RB	interleukin 10 receptor, beta	NM_000628	1091	1351	+
3588	IL10RB	interleukin 10 receptor, beta	NM_000628	1554	1871	+
3454	IFNAR1	interferon (alpha, beta and omega) receptor 1	NM_000629	1653	2030	+
3454	IFNAR1	interferon (alpha, beta and omega) receptor 1	NM_000629	2221	2420	+
3454	IFNAR1	interferon (alpha, beta and omega) receptor 1	NM_000629	2951	3115	+
3454	IFNAR1	interferon (alpha, beta and omega) receptor 1	NM_000629	4151	4446	+
596	BCL2	B-cell CLL/lymphoma 2	NM_000633	151	370	+
596	BCL2	B-cell CLL/lymphoma 2	NM_000633	815	1081	+
596	BCL2	B-cell CLL/lymphoma 2	NM_000633	1691	1920	+
596	BCL2	B-cell CLL/lymphoma 2	NM_000633	1991	2290	+
596	BCL2	B-cell CLL/lymphoma 2	NM_000633	2461	2840	+
596	BCL2	B-cell CLL/lymphoma 2	NM_000633	5811	6020	+
2936	GSR	glutathione reductase	NM_000637	1443	1741	+
6402	SELL	selectin L	NM_000655	311	636	+
6402	SELL	selectin L	NM_000655	1631	1730	+
7040	TGFB1	transforming growth factor, beta 1	NM_000660	151	660	+
95	ACY1	aminoacylase 1	NM_000666	1481	1670	+
240	ALOX5	arachidonate 5-lipoxygenase	NM_000698	2140	2436	+
645	BLVRB	biliverdin reductase B	NM_000713	61	190	+
645	BLVRB	biliverdin reductase B	NM_000713	691	850	+
782	CACNB1	calcium channel, voltage-dependent, beta 1 subunit	NM_000723	1711	1940	+
1140	CHRNB1	cholinergic receptor, nicotinic, beta 1 (muscle)	NM_000747	1501	1810	+
1312	COMT	catechol-O-methyltransferase	NM_000754	1211	1310	+
1435	CSF1	colony stimulating factor 1 (macrophage)	NM_000757	1271	1610	+
1435	CSF1	colony stimulating factor 1 (macrophage)	NM_000757	2251	2670	+
1435	CSF1	colony stimulating factor 1 (macrophage)	NM_000757	3041	3280	+
1595	CYP51A1	cytochrome P450, family 51, subfamily A, polypeptide 1	NM_000786	651	770	+
1595	CYP51A1	cytochrome P450, family 51, subfamily A, polypeptide 1	NM_000786	1321	1440	+
1595	CYP51A1	cytochrome P450, family 51, subfamily A, polypeptide 1	NM_000786	2101	2260	+
1719	DHFR	dihydrofolate reductase	NM_000791	3151	3410	+
1719	DHFR	dihydrofolate reductase	NM_000791	3521	3840	+
2907	GRINA	glutamate receptor, ionotropic, N-methyl D-aspartate-associated protein 1 (glutamate binding)	NM_000837	1591	1700	+
2948	GSTM4	glutathione S-transferase mu 4	NM_000850	1111	1280	+
3156	HMGCR	3-hydroxy-3-methylglutaryl-CoA reductase	NM_000859	1101	1220	+
3156	HMGCR	3-hydroxy-3-methylglutaryl-CoA reductase	NM_000859	2701	2949	+
3482	IGF2R	insulin-like growth factor 2 receptor	NM_000876	2651	2800	+
3482	IGF2R	insulin-like growth factor 2 receptor	NM_000876	6031	6260	+
3482	IGF2R	insulin-like growth factor 2 receptor	NM_000876	7125	7788	+
3482	IGF2R	insulin-like growth factor 2 receptor	NM_000876	8621	8900	+
3560	IL2RB	interleukin 2 receptor, beta	NM_000878	12	120	+
3614	IMPDH1	IMP (inosine 5'-monophosphate) dehydrogenase 1	NM_000883	2491	2600	+
3615	IMPDH2	IMP (inosine 5'-monophosphate) dehydrogenase 2	NM_000884	591	910	+
3676	ITGA4	integrin, alpha 4 (antigen CD49D, alpha 4 subunit of VLA-4 receptor)	NM_000885	510	800	+
3676	ITGA4	integrin, alpha 4 (antigen CD49D, alpha 4 subunit of VLA-4 receptor)	NM_000885	3730	4143	+
3676	ITGA4	integrin, alpha 4 (antigen CD49D, alpha 4 subunit of VLA-4 receptor)	NM_000885	4761	4863	+
3687	ITGAX	integrin, alpha X (complement component 3 receptor 4 subunit)	NM_000887	3541	3920	+
3687	ITGAX	integrin, alpha X (complement component 3 receptor 4 subunit)	NM_000887	4111	4290	+
3695	ITGB7	integrin, beta 7	NM_000889	71	200	+
3695	ITGB7	integrin, beta 7	NM_000889	361	510	+
3695	ITGB7	integrin, beta 7	NM_000889	2561	2860	+
5034	P4HB	prolyl 4-hydroxylase, beta polypeptide	NM_000918	1611	1820	+
5034	P4HB	prolyl 4-hydroxylase, beta polypeptide	NM_000918	1881	2020	+
5066	PAM	peptidylglycine alpha-amidating monooxygenase	NM_000919	1381	1888	+
5066	PAM	peptidylglycine alpha-amidating monooxygenase	NM_000919	3081	3280	+
5430	POLR2A	polymerase (RNA) II (DNA directed) polypeptide A, 220kDa	NM_000937	431	634	+
5430	POLR2A	polymerase (RNA) II (DNA directed) polypeptide A, 220kDa	NM_000937	851	1030	+
5430	POLR2A	polymerase (RNA) II (DNA directed) polypeptide A, 220kDa	NM_000937	4191	4410	+
5430	POLR2A	polymerase (RNA) II (DNA directed) polypeptide A, 220kDa	NM_000937	5351	6304	+
5431	POLR2B	polymerase (RNA) II (DNA directed) polypeptide B, 140kDa	NM_000938	1	110	+
5431	POLR2B	polymerase (RNA) II (DNA directed) polypeptide B, 140kDa	NM_000938	1241	1350	+
5431	POLR2B	polymerase (RNA) II (DNA directed) polypeptide B, 140kDa	NM_000938	1861	2098	+
5431	POLR2B	polymerase (RNA) II (DNA directed) polypeptide B, 140kDa	NM_000938	2601	2840	+
5534	PPP3R1	protein phosphatase 3, regulatory subunit B, alpha	NM_000945	51	310	+
5534	PPP3R1	protein phosphatase 3, regulatory subunit B, alpha	NM_000945	938	1170	+
5557	PRIM1	primase, DNA, polypeptide 1 (49kDa)	NM_000946	661	790	+
5557	PRIM1	primase, DNA, polypeptide 1 (49kDa)	NM_000946	1271	1444	+
6122	RPL3	ribosomal protein L3	NM_000967	1221	1330	+
6124	RPL4	ribosomal protein L4	NM_000968	901	1399	+
6125	RPL5	ribosomal protein L5	NM_000969	746	985	+
6129	RPL7	ribosomal protein L7	NM_000971	57	340	+
6141	RPL18	ribosomal protein L18	NM_000979	731	880	+
6142	RPL18A	ribosomal protein L18a	NM_000980	531	641	+
6146	RPL22	ribosomal protein L22	NM_000983	351	487	+
6139	RPL17	ribosomal protein L17	NM_000985	781	958	+
6154	RPL26	ribosomal protein L26	NM_000987	421	539	+
6157	RPL27A	ribosomal protein L27a	NM_000990	751	850	+
6159	RPL29	ribosomal protein L29	NM_000992	561	690	+
6167	RPL37	ribosomal protein L37	NM_000997	321	420	+
490	ATP2B1	ATPase, Ca++ transporting, plasma membrane 1	NM_001001323	119	399	+
490	ATP2B1	ATPase, Ca++ transporting, plasma membrane 1	NM_001001323	591	820	+
490	ATP2B1	ATPase, Ca++ transporting, plasma membrane 1	NM_001001323	996	1293	+
490	ATP2B1	ATPase, Ca++ transporting, plasma membrane 1	NM_001001323	2011	2240	+
490	ATP2B1	ATPase, Ca++ transporting, plasma membrane 1	NM_001001323	2301	2460	+
490	ATP2B1	ATPase, Ca++ transporting, plasma membrane 1	NM_001001323	3361	3535	+
490	ATP2B1	ATPase, Ca++ transporting, plasma membrane 1	NM_001001323	3747	4378	+
221035	REEP3	receptor accessory protein 3	NM_001001330	641	1000	+
115939	TSR3	TSR3, 20S rRNA accumulation, homolog (S. cerevisiae)	NM_001001410	878	1086	+
115939	TSR3	TSR3, 20S rRNA accumulation, homolog (S. cerevisiae)	NM_001001410	1087	1199	+
4090	SMAD5	SMAD family member 5	NM_001001419	275	766	+
4090	SMAD5	SMAD family member 5	NM_001001419	871	1100	+
4090	SMAD5	SMAD family member 5	NM_001001419	3401	3720	+
8675	STX16	syntaxin 16	NM_001001433	29	230	+
8675	STX16	syntaxin 16	NM_001001433	1771	2040	+
8675	STX16	syntaxin 16	NM_001001433	2481	2870	+
9317	PTER	phosphotriesterase related	NM_001001484	351	670	+
112950	MED8	mediator complex subunit 8	NM_001001653	471	650	+
339745	SPOPL	speckle-type POZ protein-like	NM_001001664	1451	1786	+
415116	PIM3	Pim-3 proto-oncogene, serine/threonine kinase	NM_001001852	1411	1670	+
5211	PFKL	phosphofructokinase, liver	NM_001002021	3311	3410	+
517	ATP5G2	ATP synthase, H+ transporting, mitochondrial Fo complex, subunit C2 (subunit 9)	NM_001002031	1001	1144	+
51529	ANAPC11	anaphase promoting complex subunit 11	NM_001002244	811	910	+
94240	EPSTI1	epithelial stromal interaction 1 (breast)	NM_001002264	231	730	+
94240	EPSTI1	epithelial stromal interaction 1 (breast)	NM_001002264	801	1020	+
51125	GOLGA7	golgin A7	NM_001002296	481	957	+
10051	SMC4	structural maintenance of chromosomes 4	NM_001002800	1231	1373	+
10051	SMC4	structural maintenance of chromosomes 4	NM_001002800	1412	1920	+
10051	SMC4	structural maintenance of chromosomes 4	NM_001002800	2811	2960	+
10051	SMC4	structural maintenance of chromosomes 4	NM_001002800	4205	4380	+
80223	RAB11FIP1	RAB11 family interacting protein 1 (class I)	NM_001002814	441	690	+
80223	RAB11FIP1	RAB11 family interacting protein 1 (class I)	NM_001002814	3871	4070	+
80223	RAB11FIP1	RAB11 family interacting protein 1 (class I)	NM_001002814	6631	6969	+
55727	BTBD7	BTB (POZ) domain containing 7	NM_001002860	1131	1400	+
55727	BTBD7	BTB (POZ) domain containing 7	NM_001002860	3391	3760	+
8563	THOC5	THO complex 5	NM_001002878	301	730	+
8563	THOC5	THO complex 5	NM_001002878	2441	2600	+
25776	CBY1	chibby homolog 1 (Drosophila)	NM_001002880	631	730	+
23131	GPATCH8	G patch domain containing 8	NM_001002909	931	1310	+
23131	GPATCH8	G patch domain containing 8	NM_001002909	1941	2140	+
23131	GPATCH8	G patch domain containing 8	NM_001002909	2251	2470	+
23131	GPATCH8	G patch domain containing 8	NM_001002909	3351	3830	+
221830	TWISTNB	TWIST neighbor	NM_001002926	651	1021	+
3983	ABLIM1	actin binding LIM protein 1	NM_001003408	1720	1920	+
3983	ABLIM1	actin binding LIM protein 1	NM_001003408	2411	2948	+
3983	ABLIM1	actin binding LIM protein 1	NM_001003408	3021	3256	+
3983	ABLIM1	actin binding LIM protein 1	NM_001003408	3421	3520	+
3983	ABLIM1	actin binding LIM protein 1	NM_001003408	6931	7220	+
4087	SMAD2	SMAD family member 2	NM_001003652	416	660	+
4087	SMAD2	SMAD family member 2	NM_001003652	1641	1988	+
753	LDLRAD4	low density lipoprotein receptor class A domain containing 4	NM_001003674	1141	1290	+
753	LDLRAD4	low density lipoprotein receptor class A domain containing 4	NM_001003674	1611	1930	+
79096	C11orf49	chromosome 11 open reading frame 49	NM_001003676	1531	1690	+
10042	HMGXB4	HMG box domain containing 4	NM_001003681	641	760	+
10042	HMGXB4	HMG box domain containing 4	NM_001003681	3061	3200	+
29796	UQCR10	ubiquinol-cytochrome c reductase, complex III subunit X	NM_001003684	291	505	+
9587	MAD2L1BP	MAD2L1 binding protein	NM_001003690	1031	1165	+
6239	RREB1	ras responsive element binding protein 1	NM_001003699	4661	4800	+
6239	RREB1	ras responsive element binding protein 1	NM_001003699	5401	5820	+
6239	RREB1	ras responsive element binding protein 1	NM_001003699	5971	6120	+
2733	GLE1	GLE1 RNA export mediator	NM_001003722	481	838	+
2733	GLE1	GLE1 RNA export mediator	NM_001003722	1044	1287	+
2733	GLE1	GLE1 RNA export mediator	NM_001003722	2971	3130	+
23299	BICD2	bicaudal D homolog 2 (Drosophila)	NM_001003800	1181	1410	+
445372	TRIM6-TRIM34	TRIM6-TRIM34 readthrough	NM_001003819	1461	1630	+
445372	TRIM6-TRIM34	TRIM6-TRIM34 readthrough	NM_001003819	1791	2010	+
445372	TRIM6-TRIM34	TRIM6-TRIM34 readthrough	NM_001003819	2391	2556	+
29780	PARVB	parvin, beta	NM_001003828	371	570	+
29780	PARVB	parvin, beta	NM_001003828	1441	1560	+
29780	PARVB	parvin, beta	NM_001003828	1731	1850	+
90427	BMF	Bcl2 modifying factor	NM_001003940	1031	1240	+
90427	BMF	Bcl2 modifying factor	NM_001003940	1381	1620	+
90427	BMF	Bcl2 modifying factor	NM_001003940	2081	2370	+
408050	NOMO3	NODAL modulator 3	NM_001004067	3551	3680	+
408050	NOMO3	NODAL modulator 3	NM_001004067	3691	4016	+
4345	CD200	CD200 molecule	NM_001004196	391	560	+
283337	ZNF740	zinc finger protein 740	NM_001004304	131	420	+
283337	ZNF740	zinc finger protein 740	NM_001004304	1011	1390	+
283337	ZNF740	zinc finger protein 740	NM_001004304	3463	3580	+
440400	RNASEK	ribonuclease, RNase K	NM_001004333	571	730	+
440590	ZYG11A	zyg-11 family member A, cell cycle regulator	NM_001004339	2761	2980	+
440590	ZYG11A	zyg-11 family member A, cell cycle regulator	NM_001004339	3961	4170	+
29121	CLEC2D	C-type lectin domain family 2, member D	NM_001004419	821	1090	+
29121	CLEC2D	C-type lectin domain family 2, member D	NM_001004419	1221	1360	+
29121	CLEC2D	C-type lectin domain family 2, member D	NM_001004419	1690	1898	+
1107	CHD3	chromodomain helicase DNA binding protein 3	NM_001005271	303	581	+
1107	CHD3	chromodomain helicase DNA binding protein 3	NM_001005271	891	1106	+
1107	CHD3	chromodomain helicase DNA binding protein 3	NM_001005271	1441	1590	+
1107	CHD3	chromodomain helicase DNA binding protein 3	NM_001005271	2131	2350	+
1107	CHD3	chromodomain helicase DNA binding protein 3	NM_001005271	5061	5300	+
1107	CHD3	chromodomain helicase DNA binding protein 3	NM_001005271	6651	6788	+
9500	MAGED1	melanoma antigen family D1	NM_001005333	31	160	+
9500	MAGED1	melanoma antigen family D1	NM_001005333	1231	1430	+
6001	RGS10	regulator of G-protein signaling 10	NM_001005339	571	792	+
205	AK4	adenylate kinase 4	NM_001005353	961	1299	+
205	AK4	adenylate kinase 4	NM_001005353	2041	2230	+
205	AK4	adenylate kinase 4	NM_001005353	2861	3060	+
205	AK4	adenylate kinase 4	NM_001005353	4681	4830	+
1785	DNM2	dynamin 2	NM_001005360	1541	1770	+
1785	DNM2	dynamin 2	NM_001005360	2601	2730	+
7580	ZNF32	zinc finger protein 32	NM_001005368	561	770	+
4528	MTIF2	mitochondrial translational initiation factor 2	NM_001005369	951	1270	+
4528	MTIF2	mitochondrial translational initiation factor 2	NM_001005369	2071	2307	+
4528	MTIF2	mitochondrial translational initiation factor 2	NM_001005369	2821	2920	+
10097	ACTR2	ARP2 actin-related protein 2 homolog (yeast)	NM_001005386	139	330	+
10097	ACTR2	ARP2 actin-related protein 2 homolog (yeast)	NM_001005386	381	630	+
10097	ACTR2	ARP2 actin-related protein 2 homolog (yeast)	NM_001005386	1261	1550	+
10097	ACTR2	ARP2 actin-related protein 2 homolog (yeast)	NM_001005386	1931	2060	+
10097	ACTR2	ARP2 actin-related protein 2 homolog (yeast)	NM_001005386	3251	3440	+
388403	YPEL2	yippee-like 2 (Drosophila)	NM_001005404	601	860	+
388403	YPEL2	yippee-like 2 (Drosophila)	NM_001005404	1051	1200	+
2629	GBA	glucosidase, beta, acid	NM_001005741_2	2041	2260	+
2629	GBA	glucosidase, beta, acid	NM_001005741_2	2281	2490	+
8650	NUMB	numb homolog (Drosophila)	NM_001005743	2171	2380	+
785	CACNB4	calcium channel, voltage-dependent, beta 4 subunit	NM_001005747	1461	1784	+
339123	JMJD8	jumonji domain containing 8	NM_001005920	871	1375	+
339123	JMJD8	jumonji domain containing 8	NM_001005920	1941	2040	+
56941	HMCES	5-hydroxymethylcytosine (hmC) binding, ES cell-specific	NM_001006109	1241	1458	+
6477	SIAH1	siah E3 ubiquitin protein ligase 1	NM_001006610	1301	1490	+
79109	MAPKAP1	mitogen-activated protein kinase associated protein 1	NM_001006617	591	690	+
55114	ARHGAP17	Rho GTPase activating protein 17	NM_001006634	2251	2470	+
55114	ARHGAP17	Rho GTPase activating protein 17	NM_001006634	2741	3010	+
1380	CR2	complement component (3d/Epstein Barr virus) receptor 2	NM_001006658	351	460	+
1380	CR2	complement component (3d/Epstein Barr virus) receptor 2	NM_001006658	1061	1260	+
1380	CR2	complement component (3d/Epstein Barr virus) receptor 2	NM_001006658	2541	2780	+
1380	CR2	complement component (3d/Epstein Barr virus) receptor 2	NM_001006658	3331	3768	+
6382	SDC1	syndecan 1	NM_001006946	1501	1700	+
6191	RPS4X	ribosomal protein S4, X-linked	NM_001007	794	950	+
9527	GOSR1	golgi SNAP receptor complex member 1	NM_001007024	431	530	+
9527	GOSR1	golgi SNAP receptor complex member 1	NM_001007024	721	965	+
9527	GOSR1	golgi SNAP receptor complex member 1	NM_001007024	1164	1390	+
9527	GOSR1	golgi SNAP receptor complex member 1	NM_001007024	2531	2630	+
7587	ZNF37A	zinc finger protein 37A	NM_001007094	6061	6280	+
8405	SPOP	speckle-type POZ protein	NM_001007226	1586	2025	+
474383	F8A2	coagulation factor VIII-associated 2	NM_001007523_3	971	1110	+
474384	F8A3	coagulation factor VIII-associated 3	NM_001007524_2	941	1110	+
6760	SS18	synovial sarcoma translocation, chromosome 18	NM_001007559	1479	1747	+
6760	SS18	synovial sarcoma translocation, chromosome 18	NM_001007559	1251	1428	+
126298	IRGQ	immunity-related GTPase family, Q	NM_001007561	301	580	+
126298	IRGQ	immunity-related GTPase family, Q	NM_001007561	1126	1515	+
126298	IRGQ	immunity-related GTPase family, Q	NM_001007561	3611	3740	+
126298	IRGQ	immunity-related GTPase family, Q	NM_001007561	7727	8098	+
10390	CEPT1	choline/ethanolamine phosphotransferase 1	NM_001007794	117	563	+
493753	COA5	cytochrome c oxidase assembly factor 5	NM_001008215	351	600	+
51114	ZDHHC9	zinc finger, DHHC-type containing 9	NM_001008222	1401	1680	+
8545	CGGBP1	CGG triplet repeat binding protein 1	NM_001008390	463	1086	+
201725	C4orf46	chromosome 4 open reading frame 46	NM_001008393	421	695	+
4735	2015-09-02	septin 2	NM_001008491	1028	1280	+
4735	2015-09-02	septin 2	NM_001008491	1331	1600	+
4735	2015-09-02	septin 2	NM_001008491	3091	3228	+
169200	TMEM64	transmembrane protein 64	NM_001008495	911	1320	+
5641	LGMN	legumain	NM_001008530	90	217	+
5641	LGMN	legumain	NM_001008530	1151	1380	+
5641	LGMN	legumain	NM_001008530	2031	2150	+
340533	KIAA2022	KIAA2022	NM_001008537	1731	1899	+
340533	KIAA2022	KIAA2022	NM_001008537	3851	4020	+
340533	KIAA2022	KIAA2022	NM_001008537	4321	4565	+
340533	KIAA2022	KIAA2022	NM_001008537	4851	5050	+
56267	CCBL2	cysteine conjugate-beta lyase 2	NM_001008661	166	379	+
56267	CCBL2	cysteine conjugate-beta lyase 2	NM_001008661	919	1080	+
56267	CCBL2	cysteine conjugate-beta lyase 2	NM_001008661	1981	2145	+
7675	ZNF121	zinc finger protein 121	NM_001008727	931	1030	+
8576	STK16	serine/threonine kinase 16	NM_001008910	211	340	+
8576	STK16	serine/threonine kinase 16	NM_001008910	1305	1423	+
9793	CKAP5	cytoskeleton associated protein 5	NM_001008938	991	1119	+
9793	CKAP5	cytoskeleton associated protein 5	NM_001008938	1691	1940	+
9793	CKAP5	cytoskeleton associated protein 5	NM_001008938	6011	6375	+
5516	PPP2CB	protein phosphatase 2, catalytic subunit, beta isozyme	NM_001009552	11	160	+
22883	CLSTN1	calsyntenin 1	NM_001009566	3449	3668	+
22883	CLSTN1	calsyntenin 1	NM_001009566	4101	4310	+
23318	ZCCHC11	zinc finger, CCHC domain containing 11	NM_001009881	241	490	+
23318	ZCCHC11	zinc finger, CCHC domain containing 11	NM_001009881	641	810	+
23318	ZCCHC11	zinc finger, CCHC domain containing 11	NM_001009881	2411	2860	+
146712	B3GNTL1	UDP-GlcNAc:betaGal beta-1,3-N-acetylglucosaminyltransferase-like 1	NM_001009905	1211	1361	+
23355	VPS8	vacuolar protein sorting 8 homolog (S. cerevisiae)	NM_001009921	81	240	+
23355	VPS8	vacuolar protein sorting 8 homolog (S. cerevisiae)	NM_001009921	4041	4240	+
23355	VPS8	vacuolar protein sorting 8 homolog (S. cerevisiae)	NM_001009921	4471	5027	+
29058	TMEM230	transmembrane protein 230	NM_001009924	791	940	+
29058	TMEM230	transmembrane protein 230	NM_001009924	1621	1750	+
5310	PKD1	polycystic kidney disease 1 (autosomal dominant)	NM_001009944	3785	4060	+
5310	PKD1	polycystic kidney disease 1 (autosomal dominant)	NM_001009944	4171	4310	+
5310	PKD1	polycystic kidney disease 1 (autosomal dominant)	NM_001009944	4431	4920	+
5310	PKD1	polycystic kidney disease 1 (autosomal dominant)	NM_001009944	5121	5380	+
5310	PKD1	polycystic kidney disease 1 (autosomal dominant)	NM_001009944	6041	6190	+
5310	PKD1	polycystic kidney disease 1 (autosomal dominant)	NM_001009944	6311	6660	+
5310	PKD1	polycystic kidney disease 1 (autosomal dominant)	NM_001009944	6711	6940	+
5310	PKD1	polycystic kidney disease 1 (autosomal dominant)	NM_001009944	13031	13220	+
130074	FAM168B	family with sequence similarity 168, member B	NM_001009993	861	1230	+
130074	FAM168B	family with sequence similarity 168, member B	NM_001009993	1788	1900	+
130074	FAM168B	family with sequence similarity 168, member B	NM_001009993	4781	4910	+
23028	KDM1A	lysine (K)-specific demethylase 1A	NM_001009999	461	780	+
23028	KDM1A	lysine (K)-specific demethylase 1A	NM_001009999	1271	1430	+
23028	KDM1A	lysine (K)-specific demethylase 1A	NM_001009999	1441	1774	+
23028	KDM1A	lysine (K)-specific demethylase 1A	NM_001009999	2907	3060	+
90321	ZNF766	zinc finger protein 766	NM_001010851	1571	1740	+
135293	PM20D2	peptidase M20 domain containing 2	NM_001010853	1254	1481	+
135293	PM20D2	peptidase M20 domain containing 2	NM_001010853	4043	4217	+
149603	RNF187	ring finger protein 187	NM_001010858	1181	1360	+
284611	FAM102B	family with sequence similarity 102, member B	NM_001010883	1041	1400	+
284611	FAM102B	family with sequence similarity 102, member B	NM_001010883	1441	1603	+
441168	FAM26F	family with sequence similarity 26, member F	NM_001010919	707	990	+
55830	GLT8D1	glycosyltransferase 8 domain containing 1	NM_001010983	1808	2346	+
6201	RPS7	ribosomal protein S7	NM_001011	601	710	+
389015	SLC9A4	solute carrier family 9, subfamily A (NHE4, cation proton antiporter 4), member 4	NM_001011552	3781	3911	+
84108	PCGF6	polycomb group ring finger 6	NM_001011663	1191	1344	+
122830	NAA30	N(alpha)-acetyltransferase 30, NatC catalytic subunit	NM_001011713	38	180	+
122830	NAA30	N(alpha)-acetyltransferase 30, NatC catalytic subunit	NM_001011713	321	910	+
122830	NAA30	N(alpha)-acetyltransferase 30, NatC catalytic subunit	NM_001011713	1071	1290	+
339287	MSL1	male-specific lethal 1 homolog (Drosophila)	NM_001012241	117	920	+
339287	MSL1	male-specific lethal 1 homolog (Drosophila)	NM_001012241	1071	1220	+
339287	MSL1	male-specific lethal 1 homolog (Drosophila)	NM_001012241	2591	2794	+
332	BIRC5	baculoviral IAP repeat containing 5	NM_001012271	1271	1440	+
338440	ANO9	anoctamin 9	NM_001012302	2571	2868	+
64400	AKTIP	AKT interacting protein	NM_001012398	1051	1290	+
116113	FOXP4	forkhead box P4	NM_001012426	2311	2530	+
116113	FOXP4	forkhead box P4	NM_001012426	2541	2700	+
1487	CTBP1	C-terminal binding protein 1	NM_001012614	1691	1940	+
339344	MYPOP	Myb-related transcription factor, partner of profilin	NM_001012643	1681	1780	+
6520	SLC3A2	solute carrier family 3 (amino acid transporter heavy chain), member 2	NM_001012662	527	630	+
6520	SLC3A2	solute carrier family 3 (amino acid transporter heavy chain), member 2	NM_001012662	1874	2310	+
1635	DCTD	dCMP deaminase	NM_001012732	811	1330	+
387921	NHLRC3	NHL repeat containing 3	NM_001012754	1549	2093	+
387921	NHLRC3	NHL repeat containing 3	NM_001012754	2371	2560	+
339324	ZNF260	zinc finger protein 260	NM_001012756	591	720	+
339324	ZNF260	zinc finger protein 260	NM_001012756	1491	1828	+
139886	SPIN4	spindlin family, member 4	NM_001012968	691	1180	+
8087	FXR1	fragile X mental retardation, autosomal homolog 1	NM_001013439	2321	2520	+
144245	ALG10B	ALG10B, alpha-1,2-glucosyltransferase	NM_001013620	615	880	+
144245	ALG10B	ALG10B, alpha-1,2-glucosyltransferase	NM_001013620	9671	9814	+
391059	FRRS1	ferric-chelate reductase 1	NM_001013660	2271	2576	+
402055	SRRD	SRR1 domain containing	NM_001013694	734	1257	+
440275	EIF2AK4	eukaryotic translation initiation factor 2 alpha kinase 4	NM_001013703	561	770	+
440275	EIF2AK4	eukaryotic translation initiation factor 2 alpha kinase 4	NM_001013703	2061	2200	+
440275	EIF2AK4	eukaryotic translation initiation factor 2 alpha kinase 4	NM_001013703	5181	5320	+
146206	RLTPR	RGD motif, leucine rich repeats, tropomodulin domain and proline-rich containing	NM_001013838	4291	4452	+
541578	CXorf40B	chromosome X open reading frame 40B	NM_001013845	801	960	+
55208	DCUN1D2	DCN1, defective in cullin neddylation 1, domain containing 2	NM_001014283	2371	2670	+
27005	USP21	ubiquitin specific peptidase 21	NM_001014443	441	790	+
132299	OCIAD2	OCIA domain containing 2	NM_001014446	62	260	+
83460	EMC6	ER membrane protein complex subunit 6	NM_001014764	591	858	+
3611	ILK	integrin-linked kinase	NM_001014795	1731	1920	+
3611	ILK	integrin-linked kinase	NM_001014795	1941	2060	+
9529	BAG5	BCL2-associated athanogene 5	NM_001015049	534	915	+
9529	BAG5	BCL2-associated athanogene 5	NM_001015049	1141	1620	+
9529	BAG5	BCL2-associated athanogene 5	NM_001015049	1651	1870	+
10014	HDAC5	histone deacetylase 5	NM_001015053	1981	2240	+
8480	RAE1	ribonucleic acid export 1	NM_001015885	1461	1670	+
6206	RPS12	ribosomal protein S12	NM_001016	292	458	+
117584	RFFL	ring finger and FYVE-like domain containing E3 ubiquitin protein ligase	NM_001017368	291	790	+
117584	RFFL	ring finger and FYVE-like domain containing E3 ubiquitin protein ligase	NM_001017368	971	1290	+
10147	SUGP2	SURP and G patch domain containing 2	NM_001017392	1131	1300	+
10147	SUGP2	SURP and G patch domain containing 2	NM_001017392	2291	2490	+
157570	ESCO2	establishment of sister chromatid cohesion N-acetyltransferase 2	NM_001017420	364	650	+
157570	ESCO2	establishment of sister chromatid cohesion N-acetyltransferase 2	NM_001017420	731	959	+
3635	INPP5D	inositol polyphosphate-5-phosphatase, 145kDa	NM_001017915	4196	4670	+
3320	HSP90AA1	heat shock protein 90kDa alpha (cytosolic), class A member 1	NM_001017963	668	780	+
3320	HSP90AA1	heat shock protein 90kDa alpha (cytosolic), class A member 1	NM_001017963	1281	1675	+
3320	HSP90AA1	heat shock protein 90kDa alpha (cytosolic), class A member 1	NM_001017963	2341	2680	+
3320	HSP90AA1	heat shock protein 90kDa alpha (cytosolic), class A member 1	NM_001017963	3461	3569	+
203547	VMA21	VMA21 vacuolar H+-ATPase homolog (S. cerevisiae)	NM_001017980	371	547	+
171568	POLR3H	polymerase (RNA) III (DNA directed) polypeptide H (22.9kD)	NM_001018050	1141	1449	+
26135	SERBP1	SERPINE1 mRNA binding protein 1	NM_001018067	341	570	+
26135	SERBP1	SERPINE1 mRNA binding protein 1	NM_001018067	859	1110	+
26135	SERBP1	SERPINE1 mRNA binding protein 1	NM_001018067	1361	1597	+
2908	NR3C1	nuclear receptor subfamily 3, group C, member 1 (glucocorticoid receptor)	NM_001018077	1643	2063	+
2908	NR3C1	nuclear receptor subfamily 3, group C, member 1 (glucocorticoid receptor)	NM_001018077	964	1642	+
2908	NR3C1	nuclear receptor subfamily 3, group C, member 1 (glucocorticoid receptor)	NM_001018077	2401	2560	+
2908	NR3C1	nuclear receptor subfamily 3, group C, member 1 (glucocorticoid receptor)	NM_001018077	3201	3440	+
2356	FPGS	folylpolyglutamate synthase	NM_001018078	2191	2294	+
54832	VPS13C	vacuolar protein sorting 13 homolog C (S. cerevisiae)	NM_001018088	351	479	+
54832	VPS13C	vacuolar protein sorting 13 homolog C (S. cerevisiae)	NM_001018088	1331	1610	+
54832	VPS13C	vacuolar protein sorting 13 homolog C (S. cerevisiae)	NM_001018088	4251	4460	+
54832	VPS13C	vacuolar protein sorting 13 homolog C (S. cerevisiae)	NM_001018088	6071	6210	+
54832	VPS13C	vacuolar protein sorting 13 homolog C (S. cerevisiae)	NM_001018088	6841	7110	+
54832	VPS13C	vacuolar protein sorting 13 homolog C (S. cerevisiae)	NM_001018088	8122	8370	+
54832	VPS13C	vacuolar protein sorting 13 homolog C (S. cerevisiae)	NM_001018088	10511	10780	+
8883	NAE1	NEDD8 activating enzyme E1 subunit 1	NM_001018159	820	1071	+
6210	RPS15A	ribosomal protein S15a	NM_001019	411	533	+
6217	RPS16	ribosomal protein S16	NM_001020	491	590	+
9698	PUM1	pumilio RNA-binding family member 1	NM_001020658	11	130	+
9698	PUM1	pumilio RNA-binding family member 1	NM_001020658	171	640	+
9698	PUM1	pumilio RNA-binding family member 1	NM_001020658	767	1004	+
9698	PUM1	pumilio RNA-binding family member 1	NM_001020658	2251	2480	+
9698	PUM1	pumilio RNA-binding family member 1	NM_001020658	4031	4173	+
6218	RPS17	ribosomal protein S17	NM_001021_2	271	370	+
6223	RPS19	ribosomal protein S19	NM_001022	651	840	+
390980	ZNF805	zinc finger protein 805	NM_001023563	541	830	+
390980	ZNF805	zinc finger protein 805	NM_001023563	1881	2040	+
390980	ZNF805	zinc finger protein 805	NM_001023563	9371	9620	+
440270	GOLGA8B	golgin A8 family, member B	NM_001023567	51	590	+
440270	GOLGA8B	golgin A8 family, member B	NM_001023567	731	1440	+
9657	IQCB1	IQ motif containing B1	NM_001023570	99	260	+
9657	IQCB1	IQ motif containing B1	NM_001023570	1291	1530	+
9657	IQCB1	IQ motif containing B1	NM_001023570	1761	1860	+
6227	RPS21	ribosomal protein S21	NM_001024	281	390	+
375	ARF1	ADP-ribosylation factor 1	NM_001024227	371	510	+
375	ARF1	ADP-ribosylation factor 1	NM_001024227	641	880	+
6128	RPL6	ribosomal protein L6	NM_001024662	851	1019	+
55763	EXOC1	exocyst complex component 1	NM_001024924	731	930	+
55763	EXOC1	exocyst complex component 1	NM_001024924	2681	2790	+
55763	EXOC1	exocyst complex component 1	NM_001024924	2933	3095	+
81555	YIPF5	Yip1 domain family, member 5	NM_001024947	1159	1414	+
81555	YIPF5	Yip1 domain family, member 5	NM_001024947	1671	1840	+
81555	YIPF5	Yip1 domain family, member 5	NM_001024947	1861	2010	+
6309	SC5D	sterol-C5-desaturase	NM_001024956	928	1154	+
6309	SC5D	sterol-C5-desaturase	NM_001024956	2061	2197	+
10659	CELF2	CUGBP, Elav-like family member 2	NM_001025077	125	320	+
10659	CELF2	CUGBP, Elav-like family member 2	NM_001025077	1601	1879	+
10659	CELF2	CUGBP, Elav-like family member 2	NM_001025077	5591	5910	+
10659	CELF2	CUGBP, Elav-like family member 2	NM_001025077	7651	7890	+
23	ABCF1	ATP-binding cassette, sub-family F (GCN20), member 1	NM_001025091_2	3101	3280	+
4155	MBP	myelin basic protein	NM_001025100	281	1408	+
4155	MBP	myelin basic protein	NM_001025100	2281	2380	+
1452	CSNK1A1	casein kinase 1, alpha 1	NM_001025105	1761	1890	+
1452	CSNK1A1	casein kinase 1, alpha 1	NM_001025105	2241	2370	+
201475	RAB12	RAB12, member RAS oncogene family	NM_001025300	761	860	+
272	AMPD3	adenosine monophosphate deaminase 3	NM_001025390	541	710	+
272	AMPD3	adenosine monophosphate deaminase 3	NM_001025390	2551	2990	+
81565	NDEL1	nudE neurodevelopment protein 1-like 1	NM_001025579	311	560	+
257106	ARHGAP30	Rho GTPase activating protein 30	NM_001025598	1861	2000	+
257106	ARHGAP30	Rho GTPase activating protein 30	NM_001025598	2311	2930	+
27106	ARRDC2	arrestin domain containing 2	NM_001025604	1461	1840	+
27106	ARRDC2	arrestin domain containing 2	NM_001025604	2071	2400	+
51104	ABHD17B	abhydrolase domain containing 17B	NM_001025780	691	910	+
51104	ABHD17B	abhydrolase domain containing 17B	NM_001025780	1281	1510	+
26140	TTLL3	tubulin tyrosine ligase-like family member 3	NM_001025930	2361	2650	+
26140	TTLL3	tubulin tyrosine ligase-like family member 3	NM_001025930	2911	3112	+
26140	TTLL3	tubulin tyrosine ligase-like family member 3	NM_001025930	3201	3380	+
6231	RPS26	ribosomal protein S26	NM_001029	496	672	+
387263	C6orf120	chromosome 6 open reading frame 120	NM_001029863	728	1197	+
57713	SFMBT2	Scm-like with four mbt domains 2	NM_001029880	2841	3040	+
57713	SFMBT2	Scm-like with four mbt domains 2	NM_001029880	4181	4350	+
57713	SFMBT2	Scm-like with four mbt domains 2	NM_001029880	6071	6550	+
57480	PLEKHG1	pleckstrin homology domain containing, family G (with RhoGef domain) member 1	NM_001029884	3941	4110	+
57480	PLEKHG1	pleckstrin homology domain containing, family G (with RhoGef domain) member 1	NM_001029884	4331	4450	+
6232	RPS27	ribosomal protein S27	NM_001030	251	350	+
163	AP2B1	adaptor-related protein complex 2, beta 1 subunit	NM_001030006	60	400	+
163	AP2B1	adaptor-related protein complex 2, beta 1 subunit	NM_001030006	2941	3210	+
163	AP2B1	adaptor-related protein complex 2, beta 1 subunit	NM_001030006	4842	5060	+
163	AP2B1	adaptor-related protein complex 2, beta 1 subunit	NM_001030006	5091	5410	+
164	AP1G1	adaptor-related protein complex 1, gamma 1 subunit	NM_001030007	291	390	+
164	AP1G1	adaptor-related protein complex 1, gamma 1 subunit	NM_001030007	2041	2240	+
164	AP1G1	adaptor-related protein complex 1, gamma 1 subunit	NM_001030007	2683	3317	+
164	AP1G1	adaptor-related protein complex 1, gamma 1 subunit	NM_001030007	3661	3790	+
164	AP1G1	adaptor-related protein complex 1, gamma 1 subunit	NM_001030007	5994	6240	+
164	AP1G1	adaptor-related protein complex 1, gamma 1 subunit	NM_001030007	6631	6840	+
406	ARNTL	aryl hydrocarbon receptor nuclear translocator-like	NM_001030273	631	740	+
406	ARNTL	aryl hydrocarbon receptor nuclear translocator-like	NM_001030273	2241	2420	+
6693	SPN	sialophorin	NM_001030288	261	420	+
6693	SPN	sialophorin	NM_001030288	471	1154	+
6693	SPN	sialophorin	NM_001030288	1851	1980	+
6693	SPN	sialophorin	NM_001030288	2501	2620	+
6693	SPN	sialophorin	NM_001030288	3301	3458	+
6693	SPN	sialophorin	NM_001030288	6276	6470	+
53917	RAB24	RAB24, member RAS oncogene family	NM_001031677	1140	1349	+
864	RUNX3	runt-related transcription factor 3	NM_001031680	1651	1874	+
6432	SRSF7	serine/arginine-rich splicing factor 7	NM_001031684	141	240	+
9373	PLAA	phospholipase A2-activating protein	NM_001031689	2351	2621	+
54859	ELP6	elongator acetyltransferase complex subunit 6	NM_001031703	841	1130	+
57222	ERGIC1	endoplasmic reticulum-golgi intermediate compartment (ERGIC) 1	NM_001031711	1611	1710	+
60487	TRMT11	tRNA methyltransferase 11 homolog (S. cerevisiae)	NM_001031712	1421	1638	+
63933	MCUR1	mitochondrial calcium uniporter regulator 1	NM_001031713	834	1090	+
64859	NABP1	nucleic acid binding protein 1	NM_001031716	871	1149	+
79982	DNAJB14	DnaJ (Hsp40) homolog, subfamily B, member 14	NM_001031723	118	280	+
79982	DNAJB14	DnaJ (Hsp40) homolog, subfamily B, member 14	NM_001031723	371	529	+
79982	DNAJB14	DnaJ (Hsp40) homolog, subfamily B, member 14	NM_001031723	997	1452	+
83479	DDX59	DEAD (Asp-Glu-Ala-Asp) box polypeptide 59	NM_001031725	751	920	+
91746	YTHDC1	YTH domain containing 1	NM_001031732	951	1050	+
91746	YTHDC1	YTH domain containing 1	NM_001031732	2451	2550	+
224	ALDH3A2	aldehyde dehydrogenase 3 family, member A2	NM_001031806	3052	3240	+
1456	CSNK1G3	casein kinase 1, gamma 3	NM_001031812	551	913	+
5257	PHKB	phosphorylase kinase, beta	NM_001031835	3213	3670	+
5257	PHKB	phosphorylase kinase, beta	NM_001031835	3671	3880	+
5257	PHKB	phosphorylase kinase, beta	NM_001031835	4991	5278	+
7071	KLF10	Kruppel-like factor 10	NM_001032282	891	1230	+
7071	KLF10	Kruppel-like factor 10	NM_001032282	1581	2040	+
7112	TMPO	thymopoietin	NM_001032283	761	1138	+
7112	TMPO	thymopoietin	NM_001032283	1201	1450	+
7112	TMPO	thymopoietin	NM_001032283	1611	1993	+
84722	PSRC1	proline/serine-rich coiled-coil 1	NM_001032291	1209	1350	+
8428	STK24	serine/threonine kinase 24	NM_001032296	381	604	+
10600	USP16	ubiquitin specific peptidase 16	NM_001032410	1781	2200	+
6240	RRM1	ribonucleotide reductase M1	NM_001033	1641	1820	+
6240	RRM1	ribonucleotide reductase M1	NM_001033	2504	2842	+
91304	TMEM259	transmembrane protein 259	NM_001033026	20	120	+
91304	TMEM259	transmembrane protein 259	NM_001033026	1491	1690	+
91304	TMEM259	transmembrane protein 259	NM_001033026	1791	2010	+
91304	TMEM259	transmembrane protein 259	NM_001033026	2541	2662	+
51335	NGRN	neugrin, neurite outgrowth associated	NM_001033088	551	830	+
51335	NGRN	neugrin, neurite outgrowth associated	NM_001033088	941	1140	+
51247	PAIP2	poly(A) binding protein interacting protein 2	NM_001033112	201	482	+
51128	SAR1B	secretion associated, Ras related GTPase 1B	NM_001033503	641	947	+
57649	PHF12	PHD finger protein 12	NM_001033561	811	1030	+
57649	PHF12	PHD finger protein 12	NM_001033561	2081	2270	+
57649	PHF12	PHD finger protein 12	NM_001033561	3471	3670	+
7188	TRAF5	TNF receptor-associated factor 5	NM_001033910	1141	1390	+
7188	TRAF5	TNF receptor-associated factor 5	NM_001033910	1458	1859	+
7188	TRAF5	TNF receptor-associated factor 5	NM_001033910	3061	3718	+
7073	TIAL1	TIA1 cytotoxic granule-associated RNA binding protein-like 1	NM_001033925	1630	1919	+
7073	TIAL1	TIA1 cytotoxic granule-associated RNA binding protein-like 1	NM_001033925	2201	2430	+
7311	UBA52	ubiquitin A-52 residue ribosomal protein fusion product 1	NM_001033930	481	590	+
554313	HIST2H4B	histone cluster 2, H4b	NM_001034077	5	171	+
8890	EIF2B4	eukaryotic translation initiation factor 2B, subunit 4 delta, 67kDa	NM_001034116	151	370	+
5393	EXOSC9	exosome component 9	NM_001034194	1411	1523	+
162073	ITPRIPL2	inositol 1,4,5-trisphosphate receptor interacting protein-like 2	NM_001034841	5211	5420	+
497661	C18orf32	chromosome 18 open reading frame 32	NM_001035005	351	567	+
399665	FAM102A	family with sequence similarity 102, member A	NM_001035254	121	380	+
399665	FAM102A	family with sequence similarity 102, member A	NM_001035254	1651	1970	+
116840	CNTROB	centrobin, centrosomal BRCA2 interacting protein	NM_001037144	171	280	+
116840	CNTROB	centrobin, centrosomal BRCA2 interacting protein	NM_001037144	801	980	+
116840	CNTROB	centrobin, centrosomal BRCA2 interacting protein	NM_001037144	1781	1980	+
84792	FAM220A	family with sequence similarity 220, member A	NM_001037163	821	1010	+
221937	FOXK1	forkhead box K1	NM_001037165	2221	2470	+
221937	FOXK1	forkhead box K1	NM_001037165	2561	2840	+
221937	FOXK1	forkhead box K1	NM_001037165	3001	3200	+
221937	FOXK1	forkhead box K1	NM_001037165	3711	4030	+
221937	FOXK1	forkhead box K1	NM_001037165	6558	6980	+
221937	FOXK1	forkhead box K1	NM_001037165	7011	7250	+
221937	FOXK1	forkhead box K1	NM_001037165	7291	7390	+
23597	ACOT9	acyl-CoA thioesterase 9	NM_001037171	211	420	+
23597	ACOT9	acyl-CoA thioesterase 9	NM_001037171	1568	1681	+
9453	GGPS1	geranylgeranyl diphosphate synthase 1	NM_001037277	421	530	+
8662	EIF3B	eukaryotic translation initiation factor 3, subunit B	NM_001037283	2321	2480	+
8662	EIF3B	eukaryotic translation initiation factor 3, subunit B	NM_001037283	2661	2780	+
85441	HELZ2	helicase with zinc finger 2, transcriptional coactivator	NM_001037335	3712	4140	+
85441	HELZ2	helicase with zinc finger 2, transcriptional coactivator	NM_001037335	4241	4621	+
85441	HELZ2	helicase with zinc finger 2, transcriptional coactivator	NM_001037335	5671	6052	+
85441	HELZ2	helicase with zinc finger 2, transcriptional coactivator	NM_001037335	6381	6550	+
85441	HELZ2	helicase with zinc finger 2, transcriptional coactivator	NM_001037335	6991	7160	+
5142	PDE4B	phosphodiesterase 4B, cAMP-specific	NM_001037340	2121	2480	+
8655	DYNLL1	dynein, light chain, LC8-type 1	NM_001037494	461	660	+
64374	SIL1	SIL1 nucleotide exchange factor	NM_001037633	1481	1718	+
124565	SLC38A10	solute carrier family 38, member 10	NM_001037984	2171	2320	+
124565	SLC38A10	solute carrier family 38, member 10	NM_001037984	2701	3586	+
124565	SLC38A10	solute carrier family 38, member 10	NM_001037984	4241	4340	+
26502	NARF	nuclear prelamin A recognition factor	NM_001038618	281	380	+
26502	NARF	nuclear prelamin A recognition factor	NM_001038618	1603	1770	+
56882	CDC42SE1	CDC42 small effector 1	NM_001038707	841	1300	+
5634	PRPS2	phosphoribosyl pyrophosphate synthetase 2	NM_001039091	1429	1617	+
5634	PRPS2	phosphoribosyl pyrophosphate synthetase 2	NM_001039091	1636	1950	+
6430	SRSF5	serine/arginine-rich splicing factor 5	NM_001039465	1021	1213	+
2011	MARK2	MAP/microtubule affinity-regulating kinase 2	NM_001039469	2631	2967	+
9870	AREL1	apoptosis resistant E3 ubiquitin protein ligase 1	NM_001039479	3021	3179	+
9870	AREL1	apoptosis resistant E3 ubiquitin protein ligase 1	NM_001039479	3281	3710	+
9870	AREL1	apoptosis resistant E3 ubiquitin protein ligase 1	NM_001039479	4321	4520	+
9870	AREL1	apoptosis resistant E3 ubiquitin protein ligase 1	NM_001039479	5281	5423	+
256356	GK5	glycerol kinase 5 (putative)	NM_001039547	1541	1930	+
8239	USP9X	ubiquitin specific peptidase 9, X-linked	NM_001039590	61	305	+
8239	USP9X	ubiquitin specific peptidase 9, X-linked	NM_001039590	371	680	+
8239	USP9X	ubiquitin specific peptidase 9, X-linked	NM_001039590	1437	1613	+
8239	USP9X	ubiquitin specific peptidase 9, X-linked	NM_001039590	1711	1860	+
8239	USP9X	ubiquitin specific peptidase 9, X-linked	NM_001039590	2701	2900	+
8239	USP9X	ubiquitin specific peptidase 9, X-linked	NM_001039590	6081	6613	+
8239	USP9X	ubiquitin specific peptidase 9, X-linked	NM_001039590	8151	8561	+
285148	IAH1	isoamyl acetate-hydrolyzing esterase 1 homolog (S. cerevisiae)	NM_001039613	751	900	+
58487	CREBZF	CREB/ATF bZIP transcription factor	NM_001039618	431	1518	+
58487	CREBZF	CREB/ATF bZIP transcription factor	NM_001039618	4838	5130	+
58487	CREBZF	CREB/ATF bZIP transcription factor	NM_001039618	4492	4837	+
10419	PRMT5	protein arginine methyltransferase 5	NM_001039619	214	338	+
10419	PRMT5	protein arginine methyltransferase 5	NM_001039619	2411	2592	+
55898	UNC45A	unc-45 homolog A (C. elegans)	NM_001039675	795	910	+
55898	UNC45A	unc-45 homolog A (C. elegans)	NM_001039675	3611	3750	+
54921	CHTF8	CTF8, chromosome transmission fidelity factor 8 homolog (S. cerevisiae)	NM_001039690	321	770	+
54921	CHTF8	CTF8, chromosome transmission fidelity factor 8 homolog (S. cerevisiae)	NM_001039690	2201	2380	+
54921	CHTF8	CTF8, chromosome transmission fidelity factor 8 homolog (S. cerevisiae)	NM_001039690	2451	2920	+
129450	TYW5	tRNA-yW synthesizing protein 5	NM_001039693	1021	1330	+
6619	SNAPC3	small nuclear RNA activating complex, polypeptide 3, 50kDa	NM_001039697	69	190	+
6619	SNAPC3	small nuclear RNA activating complex, polypeptide 3, 50kDa	NM_001039697	1311	1475	+
10807	SDCCAG3	serologically defined colon cancer antigen 3	NM_001039707	851	1090	+
10807	SDCCAG3	serologically defined colon cancer antigen 3	NM_001039707	1111	1210	+
80167	C4orf29	chromosome 4 open reading frame 29	NM_001039717	1021	1330	+
998	CDC42	cell division cycle 42	NM_001039802	201	300	+
998	CDC42	cell division cycle 42	NM_001039802	2171	2290	+
53344	CHIC1	cysteine-rich hydrophobic domain 1	NM_001039840	6391	6790	+
89839	ARHGAP11B	Rho GTPase activating protein 11B	NM_001039841	1	130	+
113177	IZUMO4	IZUMO family member 4	NM_001039846	831	930	+
2879	GPX4	glutathione peroxidase 4	NM_001039848	901	1000	+
148137	PROSER3	proline and serine rich 3	NM_001039887	1691	1930	+
974	CD79B	CD79b molecule, immunoglobulin-associated beta	NM_001039933	911	1260	+
140885	SIRPA	signal-regulatory protein alpha	NM_001040022	2081	2240	+
140885	SIRPA	signal-regulatory protein alpha	NM_001040022	2461	2660	+
963	CD53	CD53 molecule	NM_001040033	41	160	+
963	CD53	CD53 molecule	NM_001040033	811	1380	+
257415	FAM133B	family with sequence similarity 133, member B	NM_001040057	251	548	+
257415	FAM133B	family with sequence similarity 133, member B	NM_001040057	549	948	+
84329	HVCN1	hydrogen voltage gated channel 1	NM_001040107	62	250	+
84329	HVCN1	hydrogen voltage gated channel 1	NM_001040107	1211	1380	+
27030	MLH3	mutL homolog 3	NM_001040108	311	600	+
27030	MLH3	mutL homolog 3	NM_001040108	2801	2970	+
27030	MLH3	mutL homolog 3	NM_001040108	3051	3160	+
116985	ARAP1	ArfGAP with RhoGAP domain, ankyrin repeat and PH domain 1	NM_001040118	831	1120	+
116985	ARAP1	ArfGAP with RhoGAP domain, ankyrin repeat and PH domain 1	NM_001040118	4861	5040	+
54896	PQLC2	PQ loop repeat containing 2	NM_001040125	1841	2020	+
23089	PEG10	paternally expressed 10	NM_001040152	2991	3160	+
23089	PEG10	paternally expressed 10	NM_001040152	3701	3850	+
23089	PEG10	paternally expressed 10	NM_001040152	3901	4170	+
56650	CLDND1	claudin domain containing 1	NM_001040199	619	870	+
56650	CLDND1	claudin domain containing 1	NM_001040199	1457	1650	+
64282	PAPD5	PAP associated domain containing 5	NM_001040284	261	800	+
64282	PAPD5	PAP associated domain containing 5	NM_001040284	2074	2397	+
64282	PAPD5	PAP associated domain containing 5	NM_001040284	2398	2587	+
28958	COA3	cytochrome c oxidase assembly factor 3	NM_001040431	408	710	+
51067	YARS2	tyrosyl-tRNA synthetase 2, mitochondrial	NM_001040436	581	710	+
51067	YARS2	tyrosyl-tRNA synthetase 2, mitochondrial	NM_001040436	1401	1674	+
51665	ASB1	ankyrin repeat and SOCS box containing 1	NM_001040445	1111	1310	+
54545	MTMR12	myotubularin related protein 12	NM_001040446	1842	2597	+
54629	FAM63B	family with sequence similarity 63, member B	NM_001040450	2091	2210	+
51092	SIDT2	SID1 transmembrane family, member 2	NM_001040455	2661	2770	+
55180	LINS	lines homolog (Drosophila)	NM_001040616	1821	1980	+
83988	NCALD	neurocalcin delta	NM_001040630	441	890	+
83988	NCALD	neurocalcin delta	NM_001040630	1251	1430	+
83988	NCALD	neurocalcin delta	NM_001040630	3501	3706	+
79364	ZXDC	ZXD family zinc finger C	NM_001040653	1677	2370	+
653319	KIAA0895L	KIAA0895-like	NM_001040715	541	840	+
9989	PPP4R1	protein phosphatase 4, regulatory subunit 1	NM_001042388	1281	1480	+
9989	PPP4R1	protein phosphatase 4, regulatory subunit 1	NM_001042388	1541	1730	+
9989	PPP4R1	protein phosphatase 4, regulatory subunit 1	NM_001042388	3005	3668	+
55269	PSPC1	paraspeckle component 1	NM_001042414	1101	1400	+
831	CAST	calpastatin	NM_001042440	511	730	+
831	CAST	calpastatin	NM_001042440	1331	1490	+
831	CAST	calpastatin	NM_001042440	1641	1882	+
831	CAST	calpastatin	NM_001042440	2101	2260	+
5660	PSAP	prosaposin	NM_001042465	931	1120	+
26090	ABHD12	abhydrolase domain containing 12	NM_001042472	1633	2101	+
387119	CEP85L	centrosomal protein 85kDa-like	NM_001042475	941	1396	+
387119	CEP85L	centrosomal protein 85kDa-like	NM_001042475	2801	3030	+
23589	CARHSP1	calcium regulated heat stable protein 1, 24kDa	NM_001042476	314	420	+
23589	CARHSP1	calcium regulated heat stable protein 1, 24kDa	NM_001042476	750	917	+
23589	CARHSP1	calcium regulated heat stable protein 1, 24kDa	NM_001042476	918	1059	+
730394	GTF2H2C_2	GTF2H2 family member C, copy 2	NM_001042490_2	21	170	+
730394	GTF2H2C_2	GTF2H2 family member C, copy 2	NM_001042490_2	229	430	+
4763	NF1	neurofibromin 1	NM_001042492	2721	2870	+
4763	NF1	neurofibromin 1	NM_001042492	3051	3170	+
4763	NF1	neurofibromin 1	NM_001042492	5271	5610	+
4763	NF1	neurofibromin 1	NM_001042492	5711	5820	+
4763	NF1	neurofibromin 1	NM_001042492	8031	8160	+
4763	NF1	neurofibromin 1	NM_001042492	8641	8930	+
57150	SMIM8	small integral membrane protein 8	NM_001042493	243	470	+
9990	SLC12A6	solute carrier family 12 (potassium/chloride transporter), member 6	NM_001042496	151	450	+
9990	SLC12A6	solute carrier family 12 (potassium/chloride transporter), member 6	NM_001042496	471	600	+
9990	SLC12A6	solute carrier family 12 (potassium/chloride transporter), member 6	NM_001042496	821	977	+
9990	SLC12A6	solute carrier family 12 (potassium/chloride transporter), member 6	NM_001042496	3421	3767	+
9990	SLC12A6	solute carrier family 12 (potassium/chloride transporter), member 6	NM_001042496	3871	4500	+
9990	SLC12A6	solute carrier family 12 (potassium/chloride transporter), member 6	NM_001042496	4621	4930	+
84864	MINA	MYC induced nuclear antigen	NM_001042533	1811	1970	+
84864	MINA	MYC induced nuclear antigen	NM_001042533	2051	2230	+
84864	MINA	MYC induced nuclear antigen	NM_001042533	2451	2590	+
10479	SLC9A6	solute carrier family 9, subfamily A (NHE6, cation proton antiporter 6), member 6	NM_001042537	2001	2210	+
10479	SLC9A6	solute carrier family 9, subfamily A (NHE6, cation proton antiporter 6), member 6	NM_001042537	2901	3043	+
10479	SLC9A6	solute carrier family 9, subfamily A (NHE6, cation proton antiporter 6), member 6	NM_001042537	4031	4130	+
10479	SLC9A6	solute carrier family 9, subfamily A (NHE6, cation proton antiporter 6), member 6	NM_001042537	4141	4420	+
4150	MAZ	MYC-associated zinc finger protein (purine-binding transcription factor)	NM_001042539	2321	2547	+
9637	FEZ2	fasciculation and elongation protein zeta 2 (zygin II)	NM_001042548	681	953	+
25936	NSL1	NSL1, MIS12 kinetochore complex component	NM_001042549	734	1008	+
10592	SMC2	structural maintenance of chromosomes 2	NM_001042550	871	1450	+
10592	SMC2	structural maintenance of chromosomes 2	NM_001042550	1535	1850	+
10592	SMC2	structural maintenance of chromosomes 2	NM_001042550	2501	3122	+
10592	SMC2	structural maintenance of chromosomes 2	NM_001042550	3251	3455	+
6238	RRBP1	ribosome binding protein 1	NM_001042576	511	690	+
151613	TTC14	tetratricopeptide repeat domain 14	NM_001042601	2327	2544	+
151613	TTC14	tetratricopeptide repeat domain 14	NM_001042601	3411	4220	+
5927	KDM5A	lysine (K)-specific demethylase 5A	NM_001042603	91	311	+
5927	KDM5A	lysine (K)-specific demethylase 5A	NM_001042603	2981	3330	+
5927	KDM5A	lysine (K)-specific demethylase 5A	NM_001042603	3591	4005	+
5927	KDM5A	lysine (K)-specific demethylase 5A	NM_001042603	4043	4310	+
5927	KDM5A	lysine (K)-specific demethylase 5A	NM_001042603	4771	5250	+
5927	KDM5A	lysine (K)-specific demethylase 5A	NM_001042603	5301	5600	+
22906	TRAK1	trafficking protein, kinesin binding 1	NM_001042646	2571	2890	+
22906	TRAK1	trafficking protein, kinesin binding 1	NM_001042646	4851	4970	+
257218	SHPRH	SNF2 histone linker PHD RING helicase, E3 ubiquitin protein ligase	NM_001042683	1901	2057	+
257218	SHPRH	SNF2 histone linker PHD RING helicase, E3 ubiquitin protein ligase	NM_001042683	5321	5440	+
2268	FGR	FGR proto-oncogene, Src family tyrosine kinase	NM_001042747	191	410	+
2268	FGR	FGR proto-oncogene, Src family tyrosine kinase	NM_001042747	2381	2480	+
10735	STAG2	stromal antigen 2	NM_001042749	153	310	+
10735	STAG2	stromal antigen 2	NM_001042749	461	766	+
10735	STAG2	stromal antigen 2	NM_001042749	1151	1450	+
10735	STAG2	stromal antigen 2	NM_001042749	1971	2187	+
10735	STAG2	stromal antigen 2	NM_001042749	3161	3300	+
10735	STAG2	stromal antigen 2	NM_001042749	3771	3939	+
6558	SLC12A2	solute carrier family 12 (sodium/potassium/chloride transporter), member 2	NM_001046	3521	3650	+
10276	NET1	neuroepithelial cell transforming 1	NM_001047160	1781	2008	+
65979	PHACTR4	phosphatase and actin regulator 4	NM_001048183	901	1020	+
65979	PHACTR4	phosphatase and actin regulator 4	NM_001048183	1341	1577	+
1104	RCC1	regulator of chromosome condensation 1	NM_001048199	2001	2140	+
9985	REC8	REC8 meiotic recombination protein	NM_001048205	1061	1300	+
23155	CLCC1	chloride channel CLIC-like 1	NM_001048210	1187	2014	+
643155	SMIM15	small integral membrane protein 15	NM_001048249	311	708	+
643155	SMIM15	small integral membrane protein 15	NM_001048249	911	1101	+
7132	TNFRSF1A	tumor necrosis factor receptor superfamily, member 1A	NM_001065	2081	2198	+
7133	TNFRSF1B	tumor necrosis factor receptor superfamily, member 1B	NM_001066	3315	3647	+
7153	TOP2A	topoisomerase (DNA) II alpha 170kDa	NM_001067	3361	3500	+
7153	TOP2A	topoisomerase (DNA) II alpha 170kDa	NM_001067	3671	4110	+
7153	TOP2A	topoisomerase (DNA) II alpha 170kDa	NM_001067	4731	4870	+
7153	TOP2A	topoisomerase (DNA) II alpha 170kDa	NM_001067	5431	5540	+
7155	TOP2B	topoisomerase (DNA) II beta 180kDa	NM_001068	3261	3487	+
7155	TOP2B	topoisomerase (DNA) II beta 180kDa	NM_001068	3891	4220	+
7155	TOP2B	topoisomerase (DNA) II beta 180kDa	NM_001068	4591	4850	+
7283	TUBG1	tubulin, gamma 1	NM_001070	1611	1750	+
7283	TUBG1	tubulin, gamma 1	NM_001070	1821	1943	+
440145	MZT1	mitotic spindle organizing protein 1	NM_001071775	173	300	+
9057	SLC7A6	solute carrier family 7 (amino acid transporter light chain, y+L system), member 6	NM_001076785	1771	2012	+
9057	SLC7A6	solute carrier family 7 (amino acid transporter light chain, y+L system), member 6	NM_001076785	2582	2808	+
9057	SLC7A6	solute carrier family 7 (amino acid transporter light chain, y+L system), member 6	NM_001076785	3044	3440	+
9057	SLC7A6	solute carrier family 7 (amino acid transporter light chain, y+L system), member 6	NM_001076785	4399	4584	+
9057	SLC7A6	solute carrier family 7 (amino acid transporter light chain, y+L system), member 6	NM_001076785	5631	5970	+
79832	QSER1	glutamine and serine rich 1	NM_001076786	1401	1520	+
79832	QSER1	glutamine and serine rich 1	NM_001076786	3541	3690	+
79832	QSER1	glutamine and serine rich 1	NM_001076786	3801	4140	+
79832	QSER1	glutamine and serine rich 1	NM_001076786	4231	4468	+
79832	QSER1	glutamine and serine rich 1	NM_001076786	5391	5550	+
79832	QSER1	glutamine and serine rich 1	NM_001076786	5581	5710	+
79065	ATG9A	autophagy related 9A	NM_001077198	3011	3190	+
56928	SPPL2B	signal peptide peptidase like 2B	NM_001077238	2402	2580	+
55147	RBM23	RNA binding motif protein 23	NM_001077351	251	460	+
55147	RBM23	RNA binding motif protein 23	NM_001077351	1491	1901	+
51611	DPH5	diphthamide biosynthesis 5	NM_001077394	741	954	+
2778	GNAS	GNAS complex locus	NM_001077490	3531	3758	+
79796	ALG9	ALG9, alpha-1,2-mannosyltransferase	NM_001077691	2211	2310	+
6426	SRSF1	serine/arginine-rich splicing factor 1	NM_001078166	2561	2970	+
6426	SRSF1	serine/arginine-rich splicing factor 1	NM_001078166	4160	4330	+
2030	SLC29A1	solute carrier family 29 (equilibrative nucleoside transporter), member 1	NM_001078177	398	510	+
2030	SLC29A1	solute carrier family 29 (equilibrative nucleoside transporter), member 1	NM_001078177	1831	2140	+
2030	SLC29A1	solute carrier family 29 (equilibrative nucleoside transporter), member 1	NM_001078177	2321	2429	+
8881	CDC16	cell division cycle 16	NM_001078645	1821	2288	+
29855	UBN1	ubinuclein 1	NM_001079514	1471	1570	+
29855	UBN1	ubinuclein 1	NM_001079514	2671	2880	+
10606	PAICS	phosphoribosylaminoimidazole carboxylase, phosphoribosylaminoimidazole succinocarboxamide synthetase	NM_001079525	1461	1670	+
22807	IKZF2	IKAROS family zinc finger 2 (Helios)	NM_001079526	391	647	+
22807	IKZF2	IKAROS family zinc finger 2 (Helios)	NM_001079526	1087	1914	+
22807	IKZF2	IKAROS family zinc finger 2 (Helios)	NM_001079526	2581	2720	+
22807	IKZF2	IKAROS family zinc finger 2 (Helios)	NM_001079526	5491	5640	+
22807	IKZF2	IKAROS family zinc finger 2 (Helios)	NM_001079526	7371	7569	+
122553	TRAPPC6B	trafficking protein particle complex 6B	NM_001079537	891	1080	+
122553	TRAPPC6B	trafficking protein particle complex 6B	NM_001079537	2931	3175	+
221092	HNRNPUL2	heterogeneous nuclear ribonucleoprotein U-like 2	NM_001079559	191	380	+
221092	HNRNPUL2	heterogeneous nuclear ribonucleoprotein U-like 2	NM_001079559	2761	2970	+
2218	FKTN	fukutin	NM_001079802	1401	1740	+
841	CASP8	caspase 8, apoptosis-related cysteine peptidase	NM_001080125	1231	1530	+
57189	KIAA1147	KIAA1147	NM_001080392_2	1061	1536	+
57189	KIAA1147	KIAA1147	NM_001080392_2	2201	2558	+
57189	KIAA1147	KIAA1147	NM_001080392_2	4298	4519	+
57189	KIAA1147	KIAA1147	NM_001080392_2	5311	5476	+
57189	KIAA1147	KIAA1147	NM_001080392_2	6593	7040	+
23392	KIAA0368	KIAA0368	NM_001080398	2091	2200	+
23392	KIAA0368	KIAA0368	NM_001080398	3361	3470	+
23392	KIAA0368	KIAA0368	NM_001080398	5441	5670	+
23392	KIAA0368	KIAA0368	NM_001080398	5946	6165	+
150726	FBXO41	F-box protein 41	NM_001080410	631	810	+
150726	FBXO41	F-box protein 41	NM_001080410	2551	2966	+
253461	ZBTB38	zinc finger and BTB domain containing 38	NM_001080412	2541	2650	+
253461	ZBTB38	zinc finger and BTB domain containing 38	NM_001080412	4601	4920	+
253461	ZBTB38	zinc finger and BTB domain containing 38	NM_001080412	6241	6400	+
440193	CCDC88C	coiled-coil domain containing 88C	NM_001080414	1921	2150	+
440193	CCDC88C	coiled-coil domain containing 88C	NM_001080414	2511	2790	+
440193	CCDC88C	coiled-coil domain containing 88C	NM_001080414	5391	5540	+
440193	CCDC88C	coiled-coil domain containing 88C	NM_001080414	6461	6600	+
23350	U2SURP	U2 snRNP-associated SURP domain containing	NM_001080415	322	635	+
23350	U2SURP	U2 snRNP-associated SURP domain containing	NM_001080415	636	804	+
23350	U2SURP	U2 snRNP-associated SURP domain containing	NM_001080415	943	1130	+
23350	U2SURP	U2 snRNP-associated SURP domain containing	NM_001080415	2361	2620	+
23350	U2SURP	U2 snRNP-associated SURP domain containing	NM_001080415	2641	3177	+
23350	U2SURP	U2 snRNP-associated SURP domain containing	NM_001080415	4221	4394	+
23135	KDM6B	lysine (K)-specific demethylase 6B	NM_001080424	2651	2960	+
23135	KDM6B	lysine (K)-specific demethylase 6B	NM_001080424	3141	3500	+
23135	KDM6B	lysine (K)-specific demethylase 6B	NM_001080424	6301	6450	+
79068	FTO	fat mass and obesity associated	NM_001080432	541	1020	+
123720	WHAMM	WAS protein homolog associated with actin, golgi membranes and microtubules	NM_001080435	2351	2593	+
123720	WHAMM	WAS protein homolog associated with actin, golgi membranes and microtubules	NM_001080435	3341	3600	+
56927	GPR108	G protein-coupled receptor 108	NM_001080452	81	190	+
26173	INTS1	integrator complex subunit 1	NM_001080453	931	1120	+
26173	INTS1	integrator complex subunit 1	NM_001080453	6842	6970	+
154141	MBOAT1	membrane bound O-acyltransferase domain containing 1	NM_001080480	1581	1820	+
154141	MBOAT1	membrane bound O-acyltransferase domain containing 1	NM_001080480	2424	2730	+
85015	USP45	ubiquitin specific peptidase 45	NM_001080481	2011	2326	+
10838	ZNF275	zinc finger protein 275	NM_001080485	363	720	+
10838	ZNF275	zinc finger protein 275	NM_001080485	1141	1260	+
10838	ZNF275	zinc finger protein 275	NM_001080485	1271	1540	+
10838	ZNF275	zinc finger protein 275	NM_001080485	3421	3640	+
10838	ZNF275	zinc finger protein 275	NM_001080485	5261	5600	+
84629	TNRC18	trinucleotide repeat containing 18	NM_001080495	4001	4370	+
84629	TNRC18	trinucleotide repeat containing 18	NM_001080495	7711	7830	+
9827	RGP1	RGP1 retrograde golgi transport homolog (S. cerevisiae)	NM_001080496	1041	1510	+
79064	TMEM223	transmembrane protein 223	NM_001080501	501	680	+
84747	UNC119B	unc-119 homolog B (C. elegans)	NM_001080533	17	170	+
84747	UNC119B	unc-119 homolog B (C. elegans)	NM_001080533	4281	4400	+
440279	UNC13C	unc-13 homolog C (C. elegans)	NM_001080534	6261	6719	+
4641	MYO1C	myosin IC	NM_001080779	3371	3570	+
4641	MYO1C	myosin IC	NM_001080779	4281	4750	+
157285	SGK223	homolog of rat pragma of Rnd2	NM_001080826	781	940	+
23210	JMJD6	jumonji domain containing 6	NM_001081461	471	740	+
10482	NXF1	nuclear RNA export factor 1	NM_001081491	1831	2130	+
10482	NXF1	nuclear RNA export factor 1	NM_001081491	2721	2910	+
57187	THOC2	THO complex 2	NM_001081550	1	150	+
57187	THOC2	THO complex 2	NM_001081550	381	510	+
57187	THOC2	THO complex 2	NM_001081550	911	1100	+
57187	THOC2	THO complex 2	NM_001081550	2011	2198	+
57187	THOC2	THO complex 2	NM_001081550	2751	2930	+
57187	THOC2	THO complex 2	NM_001081550	3681	4230	+
57187	THOC2	THO complex 2	NM_001081550	4261	4847	+
1760	DMPK	dystrophia myotonica-protein kinase	NM_001081563	3101	3235	+
146691	TOM1L2	target of myb1-like 2 (chicken)	NM_001082968	1801	2040	+
146691	TOM1L2	target of myb1-like 2 (chicken)	NM_001082968	2301	2530	+
2820	GPD2	glycerol-3-phosphate dehydrogenase 2 (mitochondrial)	NM_001083112	2398	2654	+
89846	FGD3	FYVE, RhoGEF and PH domain containing 3	NM_001083536	811	930	+
79903	NAA60	N(alpha)-acetyltransferase 60, NatF catalytic subunit	NM_001083601	1321	1530	+
5727	PTCH1	patched 1	NM_001083602	4111	4288	+
124454	EARS2	glutamyl-tRNA synthetase 2, mitochondrial	NM_001083614	1561	1860	+
124454	EARS2	glutamyl-tRNA synthetase 2, mitochondrial	NM_001083614	2281	2464	+
29966	STRN3	striatin, calmodulin binding protein 3	NM_001083893	501	680	+
29966	STRN3	striatin, calmodulin binding protein 3	NM_001083893	691	820	+
29966	STRN3	striatin, calmodulin binding protein 3	NM_001083893	921	1140	+
29966	STRN3	striatin, calmodulin binding protein 3	NM_001083893	2558	2900	+
63892	THADA	thyroid adenoma associated	NM_001083953	1411	1590	+
63892	THADA	thyroid adenoma associated	NM_001083953	1601	2020	+
63892	THADA	thyroid adenoma associated	NM_001083953	6013	6280	+
79027	ZNF655	zinc finger protein 655	NM_001083956	661	1120	+
79027	ZNF655	zinc finger protein 655	NM_001083956	1431	2237	+
79027	ZNF655	zinc finger protein 655	NM_001083956	2371	2560	+
6925	TCF4	transcription factor 4	NM_001083962	2201	2376	+
6925	TCF4	transcription factor 4	NM_001083962	2581	2965	+
6925	TCF4	transcription factor 4	NM_001083962	3023	3170	+
6925	TCF4	transcription factor 4	NM_001083962	3821	3930	+
6925	TCF4	transcription factor 4	NM_001083962	4331	4490	+
6925	TCF4	transcription factor 4	NM_001083962	5771	5870	+
6925	TCF4	transcription factor 4	NM_001083962	6251	6475	+
8985	PLOD3	procollagen-lysine, 2-oxoglutarate 5-dioxygenase 3	NM_001084	610	795	+
8985	PLOD3	procollagen-lysine, 2-oxoglutarate 5-dioxygenase 3	NM_001084	2871	2970	+
790955	UQCC3	ubiquinol-cytochrome c reductase complex assembly factor 3	NM_001085372	501	616	+
133686	NADK2	NAD kinase 2, mitochondrial	NM_001085411	1321	1633	+
644019	CBWD6	COBW domain containing 6	NM_001085457	1221	1353	+
1500	CTNND1	catenin (cadherin-associated protein), delta 1	NM_001085458	81	310	+
1500	CTNND1	catenin (cadherin-associated protein), delta 1	NM_001085458	991	1380	+
1500	CTNND1	catenin (cadherin-associated protein), delta 1	NM_001085458	1811	1960	+
1500	CTNND1	catenin (cadherin-associated protein), delta 1	NM_001085458	3441	4200	+
1500	CTNND1	catenin (cadherin-associated protein), delta 1	NM_001085458	4261	4360	+
114803	MYSM1	Myb-like, SWIRM and MPN domains 1	NM_001085487	1	150	+
114803	MYSM1	Myb-like, SWIRM and MPN domains 1	NM_001085487	391	1290	+
114803	MYSM1	Myb-like, SWIRM and MPN domains 1	NM_001085487	1381	1500	+
114803	MYSM1	Myb-like, SWIRM and MPN domains 1	NM_001085487	2301	2548	+
114803	MYSM1	Myb-like, SWIRM and MPN domains 1	NM_001085487	2926	3100	+
114803	MYSM1	Myb-like, SWIRM and MPN domains 1	NM_001085487	5071	5240	+
284184	C17orf89	chromosome 17 open reading frame 89	NM_001086521	441	545	+
14	AAMP	angio-associated, migratory cell protein	NM_001087	211	380	+
47	ACLY	ATP citrate lyase	NM_001096	2991	3170	+
653519	GPR89A	G protein-coupled receptor 89A	NM_001097613	1750	1968	+
2650	GCNT1	glucosaminyl (N-acetyl) transferase 1, core 2	NM_001097634	2091	2300	+
50	ACO2	aconitase 2, mitochondrial	NM_001098	2411	2635	+
3185	HNRNPF	heterogeneous nuclear ribonucleoprotein F	NM_001098208	570	850	+
3185	HNRNPF	heterogeneous nuclear ribonucleoprotein F	NM_001098208	1041	1200	+
3157	HMGCS1	3-hydroxy-3-methylglutaryl-CoA synthase 1 (soluble)	NM_001098272	313	623	+
3157	HMGCS1	3-hydroxy-3-methylglutaryl-CoA synthase 1 (soluble)	NM_001098272	1671	1811	+
3157	HMGCS1	3-hydroxy-3-methylglutaryl-CoA synthase 1 (soluble)	NM_001098272	1843	1950	+
3157	HMGCS1	3-hydroxy-3-methylglutaryl-CoA synthase 1 (soluble)	NM_001098272	2271	2450	+
1314	COPA	coatomer protein complex, subunit alpha	NM_001098398	309	480	+
1314	COPA	coatomer protein complex, subunit alpha	NM_001098398	2901	3120	+
1314	COPA	coatomer protein complex, subunit alpha	NM_001098398	4311	4490	+
1314	COPA	coatomer protein complex, subunit alpha	NM_001098398	4531	4800	+
49854	ZBTB21	zinc finger and BTB domain containing 21	NM_001098402	351	800	+
49854	ZBTB21	zinc finger and BTB domain containing 21	NM_001098402	1001	1190	+
49854	ZBTB21	zinc finger and BTB domain containing 21	NM_001098402	2091	2290	+
49854	ZBTB21	zinc finger and BTB domain containing 21	NM_001098402	2631	2770	+
49854	ZBTB21	zinc finger and BTB domain containing 21	NM_001098402	3051	3556	+
6603	SMARCD2	SWI/SNF related, matrix associated, actin dependent regulator of chromatin, subfamily d, member 2	NM_001098426	61	280	+
6603	SMARCD2	SWI/SNF related, matrix associated, actin dependent regulator of chromatin, subfamily d, member 2	NM_001098426	2671	2770	+
79744	ZNF419	zinc finger protein 419	NM_001098491	1981	2146	+
10521	DDX17	DEAD (Asp-Glu-Ala-Asp) box helicase 17	NM_001098504	1514	2007	+
10521	DDX17	DEAD (Asp-Glu-Ala-Asp) box helicase 17	NM_001098504	2221	2383	+
10521	DDX17	DEAD (Asp-Glu-Ala-Asp) box helicase 17	NM_001098504	4551	4710	+
7756	ZNF207	zinc finger protein 207	NM_001098507	321	480	+
7756	ZNF207	zinc finger protein 207	NM_001098507	1121	1290	+
7756	ZNF207	zinc finger protein 207	NM_001098507	1653	1870	+
26586	CKAP2	cytoskeleton associated protein 2	NM_001098525	421	570	+
26586	CKAP2	cytoskeleton associated protein 2	NM_001098525	601	740	+
26586	CKAP2	cytoskeleton associated protein 2	NM_001098525	931	1190	+
8078	USP5	ubiquitin specific peptidase 5 (isopeptidase T)	NM_001098536	1481	1636	+
8078	USP5	ubiquitin specific peptidase 5 (isopeptidase T)	NM_001098536	2661	2790	+
8078	USP5	ubiquitin specific peptidase 5 (isopeptidase T)	NM_001098536	3041	3190	+
7009	TMBIM6	transmembrane BAX inhibitor motif containing 6	NM_001098576	438	590	+
7009	TMBIM6	transmembrane BAX inhibitor motif containing 6	NM_001098576	1191	1430	+
83448	PUS7L	pseudouridylate synthase 7 homolog (S. cerevisiae)-like	NM_001098615	2281	2520	+
25912	C1orf43	chromosome 1 open reading frame 43	NM_001098616	981	1375	+
25912	C1orf43	chromosome 1 open reading frame 43	NM_001098616	1781	1880	+
3663	IRF5	interferon regulatory factor 5	NM_001098627	1663	2070	+
254225	RNF169	ring finger protein 169	NM_001098638	541	730	+
254225	RNF169	ring finger protein 169	NM_001098638	1021	1350	+
254225	RNF169	ring finger protein 169	NM_001098638	1476	1780	+
254225	RNF169	ring finger protein 169	NM_001098638	1801	2136	+
254225	RNF169	ring finger protein 169	NM_001098638	4831	4960	+
254225	RNF169	ring finger protein 169	NM_001098638	7543	7818	+
11102	RPP14	ribonuclease P/MRP 14kDa subunit	NM_001098783	871	1287	+
125228	FAM210A	family with sequence similarity 210, member A	NM_001098801	371	786	+
125228	FAM210A	family with sequence similarity 210, member A	NM_001098801	1051	1313	+
84131	CEP78	centrosomal protein 78kDa	NM_001098802	2311	2609	+
125476	INO80C	INO80 complex subunit C	NM_001098817	731	940	+
84923	FAM104A	family with sequence similarity 104, member A	NM_001098832	2011	2390	+
403341	ZBTB34	zinc finger and BTB domain containing 34	NM_001099270	1101	1220	+
403341	ZBTB34	zinc finger and BTB domain containing 34	NM_001099270	1401	1623	+
5757	PTMA	prothymosin, alpha	NM_001099285	231	550	+
8910	SGCE	sarcoglycan, epsilon	NM_001099401	59	223	+
8812	CCNK	cyclin K	NM_001099402	61	260	+
8812	CCNK	cyclin K	NM_001099402	931	1220	+
8812	CCNK	cyclin K	NM_001099402	1941	2096	+
254102	EHBP1L1	EH domain binding protein 1-like 1	NM_001099409	1341	1500	+
254102	EHBP1L1	EH domain binding protein 1-like 1	NM_001099409	1931	2070	+
7994	KAT6A	K(lysine) acetyltransferase 6A	NM_001099412	311	990	+
7994	KAT6A	K(lysine) acetyltransferase 6A	NM_001099412	3161	3440	+
7994	KAT6A	K(lysine) acetyltransferase 6A	NM_001099412	4137	4520	+
7994	KAT6A	K(lysine) acetyltransferase 6A	NM_001099412	4751	4920	+
7994	KAT6A	K(lysine) acetyltransferase 6A	NM_001099412	5731	5930	+
7994	KAT6A	K(lysine) acetyltransferase 6A	NM_001099412	6201	6633	+
100101267	POM121C	POM121 transmembrane nucleoporin C	NM_001099415	3951	4150	+
25989	ULK3	unc-51 like kinase 3	NM_001099436	1551	1710	+
200916	RPL22L1	ribosomal protein L22-like 1	NM_001099645	421	553	+
728689	EIF3CL	eukaryotic translation initiation factor 3, subunit C-like	NM_001099661	861	1138	+
728689	EIF3CL	eukaryotic translation initiation factor 3, subunit C-like	NM_001099661	2791	2908	+
375743	PTAR1	protein prenyltransferase alpha subunit repeat containing 1	NM_001099666	681	900	+
375743	PTAR1	protein prenyltransferase alpha subunit repeat containing 1	NM_001099666	954	1189	+
375743	PTAR1	protein prenyltransferase alpha subunit repeat containing 1	NM_001099666	6101	6220	+
25994	HIGD1A	HIG1 hypoxia inducible domain family, member 1A	NM_001099668	1051	1167	+
116064	LRRC58	leucine rich repeat containing 58	NM_001099678	81	230	+
116064	LRRC58	leucine rich repeat containing 58	NM_001099678	651	789	+
116064	LRRC58	leucine rich repeat containing 58	NM_001099678	1091	1395	+
116064	LRRC58	leucine rich repeat containing 58	NM_001099678	1452	1624	+
116064	LRRC58	leucine rich repeat containing 58	NM_001099678	2211	2405	+
727866	FAM156B	family with sequence similarity 156, member B	NM_001099684	1001	1210	+
3384	ICAM2	intercellular adhesion molecule 2	NM_001099786	1188	1330	+
201931	TMEM192	transmembrane protein 192	NM_001100389	844	1060	+
23244	PDS5A	PDS5 cohesin associated factor A	NM_001100399	451	600	+
23244	PDS5A	PDS5 cohesin associated factor A	NM_001100399	1721	1930	+
23244	PDS5A	PDS5 cohesin associated factor A	NM_001100399	2611	2860	+
23244	PDS5A	PDS5 cohesin associated factor A	NM_001100399	3631	3810	+
23244	PDS5A	PDS5 cohesin associated factor A	NM_001100399	4081	4913	+
23244	PDS5A	PDS5 cohesin associated factor A	NM_001100399	6121	6430	+
54149	C21orf91	chromosome 21 open reading frame 91	NM_001100420	58	758	+
54542	RC3H2	ring finger and CCCH-type domains 2	NM_001100588	3661	3874	+
91768	CABLES1	Cdk5 and Abl enzyme substrate 1	NM_001100619	1891	2280	+
100113407	TMEM170B	transmembrane protein 170B	NM_001100829	291	680	+
100113407	TMEM170B	transmembrane protein 170B	NM_001100829	3311	3470	+
653820	FAM72B	family with sequence similarity 72, member B	NM_001100910	41	644	+
23241	PACS2	phosphofurin acidic cluster sorting protein 2	NM_001100913	3261	3520	+
60	ACTB	actin, beta	NM_001101	1131	1500	+
30827	CXXC1	CXXC finger protein 1	NM_001101654	636	740	+
30827	CXXC1	CXXC finger protein 1	NM_001101654	951	1140	+
30827	CXXC1	CXXC finger protein 1	NM_001101654	1681	1854	+
30827	CXXC1	CXXC finger protein 1	NM_001101654	2821	2960	+
51317	PHF21A	PHD finger protein 21A	NM_001101802	2421	2910	+
80143	SIKE1	suppressor of IKBKE 1	NM_001102396	391	560	+
80143	SIKE1	suppressor of IKBKE 1	NM_001102396	571	859	+
80143	SIKE1	suppressor of IKBKE 1	NM_001102396	3241	3390	+
10236	HNRNPR	heterogeneous nuclear ribonucleoprotein R	NM_001102398	1991	2170	+
7763	ZFAND5	zinc finger, AN1-type domain 5	NM_001102420	1231	1450	+
7763	ZFAND5	zinc finger, AN1-type domain 5	NM_001102420	1841	2163	+
7763	ZFAND5	zinc finger, AN1-type domain 5	NM_001102420	2221	2320	+
84513	PPAPDC1B	phosphatidic acid phosphatase type 2 domain containing 1B	NM_001102559	721	860	+
84513	PPAPDC1B	phosphatidic acid phosphatase type 2 domain containing 1B	NM_001102559	1710	2025	+
90338	ZNF160	zinc finger protein 160	NM_001102603	881	1230	+
54726	OTUD4	OTU deubiquitinase 4	NM_001102653	1391	1630	+
54726	OTUD4	OTU deubiquitinase 4	NM_001102653	2627	3531	+
54726	OTUD4	OTU deubiquitinase 4	NM_001102653	2141	2538	+
91607	SLFN11	schlafen family member 11	NM_001104587	1911	2100	+
91607	SLFN11	schlafen family member 11	NM_001104587	2791	3010	+
55007	FAM118A	family with sequence similarity 118, member A	NM_001104595	1751	2077	+
55186	SLC25A36	solute carrier family 25 (pyrimidine nucleotide carrier), member 36	NM_001104647	1017	1328	+
55186	SLC25A36	solute carrier family 25 (pyrimidine nucleotide carrier), member 36	NM_001104647	657	1016	+
55186	SLC25A36	solute carrier family 25 (pyrimidine nucleotide carrier), member 36	NM_001104647	2451	2715	+
55186	SLC25A36	solute carrier family 25 (pyrimidine nucleotide carrier), member 36	NM_001104647	4091	4233	+
64319	FBRS	fibrosin	NM_001105079	2421	2580	+
9070	ASH2L	ash2 (absent, small, or homeotic)-like (Drosophila)	NM_001105214	1981	2180	+
9765	ZFYVE16	zinc finger, FYVE domain containing 16	NM_001105251	505	760	+
8525	DGKZ	diacylglycerol kinase, zeta	NM_001105540	3401	3816	+
8525	DGKZ	diacylglycerol kinase, zeta	NM_001105540	3931	4075	+
9473	THEMIS2	thymocyte selection associated family member 2	NM_001105556	1401	1590	+
9473	THEMIS2	thymocyte selection associated family member 2	NM_001105556	2011	2150	+
9473	THEMIS2	thymocyte selection associated family member 2	NM_001105556	2371	2640	+
10277	UBE4B	ubiquitination factor E4B	NM_001105562	221	710	+
10277	UBE4B	ubiquitination factor E4B	NM_001105562	4421	4870	+
10277	UBE4B	ubiquitination factor E4B	NM_001105562	5001	5150	+
390916	NUDT19	nudix (nucleoside diphosphate linked moiety X)-type motif 19	NM_001105570	225	446	+
390916	NUDT19	nudix (nucleoside diphosphate linked moiety X)-type motif 19	NM_001105570	881	1159	+
200933	FBXO45	F-box protein 45	NM_001105573	621	1180	+
101	ADAM8	ADAM metallopeptidase domain 8	NM_001109	2911	3120	+
283450	HECTD4	HECT domain containing E3 ubiquitin protein ligase 4	NM_001109662	171	390	+
283450	HECTD4	HECT domain containing E3 ubiquitin protein ligase 4	NM_001109662	411	660	+
283450	HECTD4	HECT domain containing E3 ubiquitin protein ligase 4	NM_001109662	9641	9800	+
283450	HECTD4	HECT domain containing E3 ubiquitin protein ligase 4	NM_001109662	9851	10000	+
283450	HECTD4	HECT domain containing E3 ubiquitin protein ligase 4	NM_001109662	10641	10820	+
283450	HECTD4	HECT domain containing E3 ubiquitin protein ligase 4	NM_001109662	11351	11510	+
283450	HECTD4	HECT domain containing E3 ubiquitin protein ligase 4	NM_001109662	14951	15140	+
102	ADAM10	ADAM metallopeptidase domain 10	NM_001110	190	350	+
102	ADAM10	ADAM metallopeptidase domain 10	NM_001110	2651	3101	+
102	ADAM10	ADAM metallopeptidase domain 10	NM_001110	3411	3540	+
2316	FLNA	filamin A, alpha	NM_001110556	3611	3860	+
5141	PDE4A	phosphodiesterase 4A, cAMP-specific	NM_001111307	2026	2440	+
5141	PDE4A	phosphodiesterase 4A, cAMP-specific	NM_001111307	2581	2927	+
79039	DDX54	DEAD (Asp-Glu-Ala-Asp) box polypeptide 54	NM_001111322	1901	2060	+
79039	DDX54	DEAD (Asp-Glu-Ala-Asp) box polypeptide 54	NM_001111322	2131	2430	+
79039	DDX54	DEAD (Asp-Glu-Ala-Asp) box polypeptide 54	NM_001111322	2771	3061	+
23272	FAM208A	family with sequence similarity 208, member A	NM_001112736	231	500	+
23272	FAM208A	family with sequence similarity 208, member A	NM_001112736	1918	2330	+
23272	FAM208A	family with sequence similarity 208, member A	NM_001112736	2426	2703	+
23272	FAM208A	family with sequence similarity 208, member A	NM_001112736	2996	3179	+
23272	FAM208A	family with sequence similarity 208, member A	NM_001112736	3180	3894	+
23272	FAM208A	family with sequence similarity 208, member A	NM_001112736	4626	5259	+
100131187	TSTD1	thiosulfate sulfurtransferase (rhodanese)-like domain containing 1	NM_001113205	511	665	+
100134934	TEN1	TEN1 CST complex subunit	NM_001113324	611	790	+
100134934	TEN1	TEN1 CST complex subunit	NM_001113324	801	970	+
55215	FANCI	Fanconi anemia, complementation group I	NM_001113378	1	100	+
55215	FANCI	Fanconi anemia, complementation group I	NM_001113378	161	280	+
55215	FANCI	Fanconi anemia, complementation group I	NM_001113378	2101	2330	+
55215	FANCI	Fanconi anemia, complementation group I	NM_001113378	3936	4137	+
55215	FANCI	Fanconi anemia, complementation group I	NM_001113378	4433	4600	+
8874	ARHGEF7	Rho guanine nucleotide exchange factor (GEF) 7	NM_001113511	2051	2270	+
165631	PARP15	poly (ADP-ribose) polymerase family, member 15	NM_001113523	1601	1810	+
165631	PARP15	poly (ADP-ribose) polymerase family, member 15	NM_001113523	1831	2105	+
51474	LIMA1	LIM domain and actin binding 1	NM_001113546	531	750	+
51474	LIMA1	LIM domain and actin binding 1	NM_001113546	1951	2256	+
51474	LIMA1	LIM domain and actin binding 1	NM_001113546	2286	2530	+
51474	LIMA1	LIM domain and actin binding 1	NM_001113546	3271	3380	+
51326	ARL17A	ADP-ribosylation factor-like 17A	NM_001113738_2	4451	4683	+
113	ADCY7	adenylate cyclase 7	NM_001114	11	110	+
113	ADCY7	adenylate cyclase 7	NM_001114	3356	3920	+
113	ADCY7	adenylate cyclase 7	NM_001114	4661	5010	+
996	CDC27	cell division cycle 27	NM_001114091	46	230	+
996	CDC27	cell division cycle 27	NM_001114091	1113	1519	+
996	CDC27	cell division cycle 27	NM_001114091	2251	2430	+
996	CDC27	cell division cycle 27	NM_001114091	2471	2961	+
996	CDC27	cell division cycle 27	NM_001114091	3041	3259	+
996	CDC27	cell division cycle 27	NM_001114091	3401	3530	+
26065	LSM14A	LSM14A, SCD6 homolog A (S. cerevisiae)	NM_001114093_2	833	1330	+
26065	LSM14A	LSM14A, SCD6 homolog A (S. cerevisiae)	NM_001114093_2	1391	1567	+
55421	C17orf85	chromosome 17 open reading frame 85	NM_001114118	541	790	+
55421	C17orf85	chromosome 17 open reading frame 85	NM_001114118	961	1356	+
55421	C17orf85	chromosome 17 open reading frame 85	NM_001114118	1721	1824	+
55421	C17orf85	chromosome 17 open reading frame 85	NM_001114118	2251	2630	+
1111	CHEK1	checkpoint kinase 1	NM_001114122	941	1080	+
51135	IRAK4	interleukin-1 receptor-associated kinase 4	NM_001114182	1451	1570	+
51135	IRAK4	interleukin-1 receptor-associated kinase 4	NM_001114182	2401	2670	+
51135	IRAK4	interleukin-1 receptor-associated kinase 4	NM_001114182	2781	2882	+
167153	PAPD4	PAP associated domain containing 4	NM_001114394	231	460	+
167153	PAPD4	PAP associated domain containing 4	NM_001114394	1691	1880	+
26099	SZRD1	SUZ RNA binding domain containing 1	NM_001114600	211	560	+
26099	SZRD1	SUZ RNA binding domain containing 1	NM_001114600	631	913	+
26099	SZRD1	SUZ RNA binding domain containing 1	NM_001114600	2871	3010	+
4245	MGAT1	mannosyl (alpha-1,3-)-glycoprotein beta-1,2-N-acetylglucosaminyltransferase	NM_001114618	241	580	+
4245	MGAT1	mannosyl (alpha-1,3-)-glycoprotein beta-1,2-N-acetylglucosaminyltransferase	NM_001114618	1321	1996	+
55120	FANCL	Fanconi anemia, complementation group L	NM_001114636	1184	1566	+
55120	FANCL	Fanconi anemia, complementation group L	NM_001114636	1567	1680	+
55683	KANSL3	KAT8 regulatory NSL complex subunit 3	NM_001115016	3121	3550	+
55683	KANSL3	KAT8 regulatory NSL complex subunit 3	NM_001115016	3601	3990	+
55683	KANSL3	KAT8 regulatory NSL complex subunit 3	NM_001115016	4481	4670	+
10227	MFSD10	major facilitator superfamily domain containing 10	NM_001120	1751	1944	+
123	PLIN2	perilipin 2	NM_001122	1301	1600	+
9328	GTF3C5	general transcription factor IIIC, polypeptide 5, 63kDa	NM_001122823	201	390	+
9328	GTF3C5	general transcription factor IIIC, polypeptide 5, 63kDa	NM_001122823	1801	2050	+
9328	GTF3C5	general transcription factor IIIC, polypeptide 5, 63kDa	NM_001122823	2181	2440	+
222236	NAPEPLD	N-acyl phosphatidylethanolamine phospholipase D	NM_001122838_2	401	570	+
222236	NAPEPLD	N-acyl phosphatidylethanolamine phospholipase D	NM_001122838_2	916	1160	+
222236	NAPEPLD	N-acyl phosphatidylethanolamine phospholipase D	NM_001122838_2	1341	1548	+
28988	DBNL	drebrin-like	NM_001122956	78	250	+
28988	DBNL	drebrin-like	NM_001122956	381	520	+
57223	SMEK2	SMEK homolog 2, suppressor of mek1 (Dictyostelium)	NM_001122964	100	320	+
57223	SMEK2	SMEK homolog 2, suppressor of mek1 (Dictyostelium)	NM_001122964	701	1282	+
57223	SMEK2	SMEK homolog 2, suppressor of mek1 (Dictyostelium)	NM_001122964	2502	2860	+
57223	SMEK2	SMEK homolog 2, suppressor of mek1 (Dictyostelium)	NM_001122964	2981	3170	+
644591	PPIAL4G	peptidylprolyl isomerase A (cyclophilin A)-like 4G	NM_001123068	625	730	+
729533	FAM72A	family with sequence similarity 72, member A	NM_001123168	1	290	+
5537	PPP6C	protein phosphatase 6, catalytic subunit	NM_001123355	1301	1480	+
5537	PPP6C	protein phosphatase 6, catalytic subunit	NM_001123355	1591	1798	+
5537	PPP6C	protein phosphatase 6, catalytic subunit	NM_001123355	3411	3550	+
440957	SMIM4	small integral membrane protein 4	NM_001124767	291	390	+
141	ADPRH	ADP-ribosylarginine hydrolase	NM_001125	494	620	+
141	ADPRH	ADP-ribosylarginine hydrolase	NM_001125	3561	3667	+
159	ADSS	adenylosuccinate synthase	NM_001126	1241	1420	+
159	ADSS	adenylosuccinate synthase	NM_001126	1626	1807	+
29127	RACGAP1	Rac GTPase activating protein 1	NM_001126103	2211	2350	+
9056	SLC7A7	solute carrier family 7 (amino acid transporter light chain, y+L system), member 7	NM_001126106	561	800	+
9056	SLC7A7	solute carrier family 7 (amino acid transporter light chain, y+L system), member 7	NM_001126106	1941	2200	+
734	OSGIN2	oxidative stress induced growth inhibitor family member 2	NM_001126111	848	1250	+
734	OSGIN2	oxidative stress induced growth inhibitor family member 2	NM_001126111	1261	1590	+
734	OSGIN2	oxidative stress induced growth inhibitor family member 2	NM_001126111	1771	2022	+
64785	GINS3	GINS complex subunit 3 (Psf3 homolog)	NM_001126129	831	930	+
162	AP1B1	adaptor-related protein complex 1, beta 1 subunit	NM_001127	51	150	+
54872	PIGG	phosphatidylinositol glycan anchor biosynthesis, class G	NM_001127178	1861	2120	+
54872	PIGG	phosphatidylinositol glycan anchor biosynthesis, class G	NM_001127178	3041	3239	+
91687	CENPL	centromere protein L	NM_001127181	1391	1560	+
91687	CENPL	centromere protein L	NM_001127181	1761	1970	+
7555	CNBP	CCHC-type zinc finger, nucleic acid binding protein	NM_001127192	1191	1430	+
7555	CNBP	CCHC-type zinc finger, nucleic acid binding protein	NM_001127192	1521	1711	+
11322	TMC6	transmembrane channel-like 6	NM_001127198	2701	2890	+
54790	TET2	tet methylcytosine dioxygenase 2	NM_001127208	1911	2090	+
54790	TET2	tet methylcytosine dioxygenase 2	NM_001127208	2461	3080	+
54790	TET2	tet methylcytosine dioxygenase 2	NM_001127208	3631	3840	+
54790	TET2	tet methylcytosine dioxygenase 2	NM_001127208	5181	5380	+
54790	TET2	tet methylcytosine dioxygenase 2	NM_001127208	5781	5910	+
54790	TET2	tet methylcytosine dioxygenase 2	NM_001127208	5971	6160	+
54790	TET2	tet methylcytosine dioxygenase 2	NM_001127208	6181	6500	+
966	CD59	CD59 molecule, complement regulatory protein	NM_001127223	181	280	+
966	CD59	CD59 molecule, complement regulatory protein	NM_001127223	461	710	+
966	CD59	CD59 molecule, complement regulatory protein	NM_001127223	821	950	+
966	CD59	CD59 molecule, complement regulatory protein	NM_001127223	5431	5530	+
92305	TMEM129	transmembrane protein 129, E3 ubiquitin protein ligase	NM_001127266	991	1180	+
23468	CBX5	chromobox homolog 5	NM_001127322	301	953	+
23468	CBX5	chromobox homolog 5	NM_001127322	2061	2230	+
23468	CBX5	chromobox homolog 5	NM_001127322	3061	3383	+
23468	CBX5	chromobox homolog 5	NM_001127322	6151	6350	+
23468	CBX5	chromobox homolog 5	NM_001127322	6501	6715	+
23468	CBX5	chromobox homolog 5	NM_001127322	8821	9010	+
23468	CBX5	chromobox homolog 5	NM_001127322	10721	10950	+
23468	CBX5	chromobox homolog 5	NM_001127322	11554	11698	+
10459	MAD2L2	MAD2 mitotic arrest deficient-like 2 (yeast)	NM_001127325	911	1135	+
57157	PHTF2	putative homeodomain transcription factor 2	NM_001127358	671	860	+
57157	PHTF2	putative homeodomain transcription factor 2	NM_001127358	3401	3600	+
57157	PHTF2	putative homeodomain transcription factor 2	NM_001127358	4491	4670	+
127544	RNF19B	ring finger protein 19B	NM_001127361	1911	2421	+
55536	CDCA7L	cell division cycle associated 7-like	NM_001127370	426	900	+
55536	CDCA7L	cell division cycle associated 7-like	NM_001127370	1081	1210	+
151194	METTL21A	methyltransferase like 21A	NM_001127395	481	710	+
51646	YPEL5	yippee-like 5 (Drosophila)	NM_001127401	81	180	+
51646	YPEL5	yippee-like 5 (Drosophila)	NM_001127401	701	1160	+
9924	PAN2	PAN2 poly(A) specific ribonuclease subunit	NM_001127460	243	520	+
9924	PAN2	PAN2 poly(A) specific ribonuclease subunit	NM_001127460	1501	1650	+
9924	PAN2	PAN2 poly(A) specific ribonuclease subunit	NM_001127460	2741	2950	+
9924	PAN2	PAN2 poly(A) specific ribonuclease subunit	NM_001127460	3961	4510	+
51147	ING4	inhibitor of growth family, member 4	NM_001127582	351	560	+
55670	PEX26	peroxisomal biogenesis factor 26	NM_001127649	1331	1714	+
5476	CTSA	cathepsin A	NM_001127695	2111	2279	+
134957	STXBP5	syntaxin binding protein 5 (tomosyn)	NM_001127715	3791	3920	+
134957	STXBP5	syntaxin binding protein 5 (tomosyn)	NM_001127715	4061	4217	+
6935	ZEB1	zinc finger E-box binding homeobox 1	NM_001128128	561	700	+
6935	ZEB1	zinc finger E-box binding homeobox 1	NM_001128128	1351	1480	+
6935	ZEB1	zinc finger E-box binding homeobox 1	NM_001128128	2551	2809	+
6935	ZEB1	zinc finger E-box binding homeobox 1	NM_001128128	3401	3718	+
151525	WDSUB1	WD repeat, sterile alpha motif and U-box domain containing 1	NM_001128213	1561	1680	+
56916	SMARCAD1	SWI/SNF-related, matrix-associated actin-dependent regulator of chromatin, subfamily a, containing DEAD/H box 1	NM_001128429	1141	1516	+
56916	SMARCAD1	SWI/SNF-related, matrix-associated actin-dependent regulator of chromatin, subfamily a, containing DEAD/H box 1	NM_001128429	2321	2550	+
56916	SMARCAD1	SWI/SNF-related, matrix-associated actin-dependent regulator of chromatin, subfamily a, containing DEAD/H box 1	NM_001128429	3141	3626	+
56916	SMARCAD1	SWI/SNF-related, matrix-associated actin-dependent regulator of chromatin, subfamily a, containing DEAD/H box 1	NM_001128429	4121	4250	+
50650	ARHGEF3	Rho guanine nucleotide exchange factor (GEF) 3	NM_001128616	2011	2280	+
50650	ARHGEF3	Rho guanine nucleotide exchange factor (GEF) 3	NM_001128616	2681	2970	+
767558	LUZP6	leucine zipper protein 6	NM_001128619	127	540	+
767558	LUZP6	leucine zipper protein 6	NM_001128619	721	1008	+
5058	PAK1	p21 protein (Cdc42/Rac)-activated kinase 1	NM_001128620	2121	2554	+
6597	SMARCA4	SWI/SNF related, matrix associated, actin dependent regulator of chromatin, subfamily a, member 4	NM_001128844	2111	2470	+
6597	SMARCA4	SWI/SNF related, matrix associated, actin dependent regulator of chromatin, subfamily a, member 4	NM_001128844	5341	5566	+
4140	MARK3	MAP/microtubule affinity-regulating kinase 3	NM_001128918	1581	1720	+
4140	MARK3	MAP/microtubule affinity-regulating kinase 3	NM_001128918	2580	2946	+
3628	INPP1	inositol polyphosphate-1-phosphatase	NM_001128928	1541	1998	+
50814	NSDHL	NAD(P) dependent steroid dehydrogenase-like	NM_001129765	1471	1621	+
55634	KRBOX4	KRAB box domain containing 4	NM_001129899	651	1300	+
2935	GSPT1	G1 to S phase transition 1	NM_001130007	701	930	+
2935	GSPT1	G1 to S phase transition 1	NM_001130007	1201	1417	+
348654	GEN1	GEN1 Holliday junction 5' flap endonuclease	NM_001130009	1731	1990	+
348654	GEN1	GEN1 Holliday junction 5' flap endonuclease	NM_001130009	2181	2370	+
348654	GEN1	GEN1 Holliday junction 5' flap endonuclease	NM_001130009	2621	2850	+
348654	GEN1	GEN1 Holliday junction 5' flap endonuclease	NM_001130009	4871	5210	+
535	ATP6V0A1	ATPase, H+ transporting, lysosomal V0 subunit a1	NM_001130020	51	190	+
535	ATP6V0A1	ATPase, H+ transporting, lysosomal V0 subunit a1	NM_001130020	2611	2740	+
535	ATP6V0A1	ATPase, H+ transporting, lysosomal V0 subunit a1	NM_001130020	2931	3109	+
535	ATP6V0A1	ATPase, H+ transporting, lysosomal V0 subunit a1	NM_001130020	3801	3990	+
1198	CLK3	CDC-like kinase 3	NM_001130028	2374	2563	+
54811	ZNF562	zinc finger protein 562	NM_001130031	561	740	+
54811	ZNF562	zinc finger protein 562	NM_001130031	871	1070	+
54811	ZNF562	zinc finger protein 562	NM_001130031	1411	1560	+
6464	SHC1	SHC (Src homology 2 domain containing) transforming protein 1	NM_001130040	454	610	+
1429	CRYZ	crystallin, zeta (quinone reductase)	NM_001130042	1001	1220	+
1429	CRYZ	crystallin, zeta (quinone reductase)	NM_001130042	1851	1980	+
4650	MYO9B	myosin IXB	NM_001130065	6671	6930	+
4650	MYO9B	myosin IXB	NM_001130065	7201	7615	+
3735	KARS	lysyl-tRNA synthetase	NM_001130089	251	450	+
10087	COL4A3BP	collagen, type IV, alpha 3 (Goodpasture antigen) binding protein	NM_001130105	381	683	+
10087	COL4A3BP	collagen, type IV, alpha 3 (Goodpasture antigen) binding protein	NM_001130105	1266	1530	+
10087	COL4A3BP	collagen, type IV, alpha 3 (Goodpasture antigen) binding protein	NM_001130105	1694	1886	+
10087	COL4A3BP	collagen, type IV, alpha 3 (Goodpasture antigen) binding protein	NM_001130105	5021	5120	+
4602	MYB	v-myb avian myeloblastosis viral oncogene homolog	NM_001130173	581	750	+
6709	SPTAN1	spectrin, alpha, non-erythrocytic 1	NM_001130438	5381	5510	+
6726	SRP9	signal recognition particle 9kDa	NM_001130440	1481	1598	+
6744	SSFA2	sperm specific antigen 2	NM_001130445	1221	1330	+
6744	SSFA2	sperm specific antigen 2	NM_001130445	1361	1670	+
6744	SSFA2	sperm specific antigen 2	NM_001130445	2081	2500	+
6744	SSFA2	sperm specific antigen 2	NM_001130445	2921	3070	+
6744	SSFA2	sperm specific antigen 2	NM_001130445	3641	3800	+
6744	SSFA2	sperm specific antigen 2	NM_001130445	3831	4070	+
9043	SPAG9	sperm associated antigen 9	NM_001130528	491	814	+
9043	SPAG9	sperm associated antigen 9	NM_001130528	1071	1240	+
9043	SPAG9	sperm associated antigen 9	NM_001130528	1455	1820	+
9043	SPAG9	sperm associated antigen 9	NM_001130528	2971	3130	+
9043	SPAG9	sperm associated antigen 9	NM_001130528	6121	6305	+
1977	EIF4E	eukaryotic translation initiation factor 4E	NM_001130679	1515	1730	+
1977	EIF4E	eukaryotic translation initiation factor 4E	NM_001130679	2121	2310	+
26034	IPCEF1	interaction protein for cytohesin exchange factors 1	NM_001130699	1351	1540	+
26034	IPCEF1	interaction protein for cytohesin exchange factors 1	NM_001130699	1886	2178	+
26034	IPCEF1	interaction protein for cytohesin exchange factors 1	NM_001130699	2321	2502	+
1786	DNMT1	DNA (cytosine-5-)-methyltransferase 1	NM_001130823	711	1200	+
1786	DNMT1	DNA (cytosine-5-)-methyltransferase 1	NM_001130823	2211	2481	+
8634	RTCA	RNA 3'-terminal phosphate cyclase	NM_001130841	1301	1624	+
51719	CAB39	calcium binding protein 39	NM_001130849	401	780	+
51719	CAB39	calcium binding protein 39	NM_001130849	1501	1700	+
51719	CAB39	calcium binding protein 39	NM_001130849	1770	1946	+
10910	SUGT1	SGT1, suppressor of G2 allele of SKP1 (S. cerevisiae)	NM_001130912	885	1120	+
10950	BTG3	BTG family, member 3	NM_001130914_2	301	470	+
10950	BTG3	BTG family, member 3	NM_001130914_2	1491	1590	+
647087	C7orf73	chromosome 7 open reading frame 73	NM_001130929	111	280	+
647087	C7orf73	chromosome 7 open reading frame 73	NM_001130929	321	528	+
23370	ARHGEF18	Rho/Rac guanine nucleotide exchange factor (GEF) 18	NM_001130955	2011	2190	+
23306	TMEM194A	transmembrane protein 194A	NM_001130963	1171	1450	+
23306	TMEM194A	transmembrane protein 194A	NM_001130963	3091	3234	+
23306	TMEM194A	transmembrane protein 194A	NM_001130963	4081	4310	+
23306	TMEM194A	transmembrane protein 194A	NM_001130963	4661	4820	+
23353	SUN1	Sad1 and UNC84 domain containing 1	NM_001130965	2331	2626	+
6916	TBXAS1	thromboxane A synthase 1 (platelet)	NM_001130966	1441	1700	+
23240	KIAA0922	KIAA0922	NM_001131007	3236	3463	+
23240	KIAA0922	KIAA0922	NM_001131007	4581	4981	+
3631	INPP4A	inositol polyphosphate-4-phosphatase, type I, 107kDa	NM_001134224	1351	1530	+
3631	INPP4A	inositol polyphosphate-4-phosphatase, type I, 107kDa	NM_001134224	1871	2030	+
3631	INPP4A	inositol polyphosphate-4-phosphatase, type I, 107kDa	NM_001134224	3171	3390	+
3631	INPP4A	inositol polyphosphate-4-phosphatase, type I, 107kDa	NM_001134224	4681	4880	+
3631	INPP4A	inositol polyphosphate-4-phosphatase, type I, 107kDa	NM_001134224	5900	6270	+
10947	AP3M2	adaptor-related protein complex 3, mu 2 subunit	NM_001134296	1870	2290	+
10947	AP3M2	adaptor-related protein complex 3, mu 2 subunit	NM_001134296	1671	1827	+
10947	AP3M2	adaptor-related protein complex 3, mu 2 subunit	NM_001134296	2761	2970	+
9922	IQSEC1	IQ motif and Sec7 domain 1	NM_001134382	1031	1210	+
9922	IQSEC1	IQ motif and Sec7 domain 1	NM_001134382	1221	1360	+
9922	IQSEC1	IQ motif and Sec7 domain 1	NM_001134382	3781	3892	+
9922	IQSEC1	IQ motif and Sec7 domain 1	NM_001134382	4571	4760	+
9922	IQSEC1	IQ motif and Sec7 domain 1	NM_001134382	5021	5210	+
9922	IQSEC1	IQ motif and Sec7 domain 1	NM_001134382	5301	5590	+
9922	IQSEC1	IQ motif and Sec7 domain 1	NM_001134382	6961	7180	+
55146	ZDHHC4	zinc finger, DHHC-type containing 4	NM_001134387	1221	1545	+
284613	CYB561D1	cytochrome b561 family, member D1	NM_001134404	811	1280	+
55171	TBCCD1	TBCC domain containing 1	NM_001134415	1631	2080	+
8317	CDC7	cell division cycle 7	NM_001134420	891	1084	+
8317	CDC7	cell division cycle 7	NM_001134420	1572	1945	+
55573	CDV3	CDV3 homolog (mouse)	NM_001134422	731	860	+
55573	CDV3	CDV3 homolog (mouse)	NM_001134422	1081	1210	+
55573	CDV3	CDV3 homolog (mouse)	NM_001134422	1841	2610	+
401505	TOMM5	translocase of outer mitochondrial membrane 5 homolog (yeast)	NM_001134484	411	612	+
100128731	OST4	oligosaccharyltransferase 4 homolog (S. cerevisiae)	NM_001134693	291	470	+
51194	IPO11	importin 11	NM_001134779	1341	1440	+
51194	IPO11	importin 11	NM_001134779	2902	3160	+
6932	TCF7	transcription factor 7 (T-cell specific, HMG-box)	NM_001134851	1591	1710	+
201158	TVP23C	trans-golgi network vesicle protein 23 homolog C (S. cerevisiae)	NM_001135036	145	295	+
1690	COCH	cochlin	NM_001135058	1391	1660	+
23516	SLC39A14	solute carrier family 39 (zinc transporter), member 14	NM_001135153	1679	2003	+
3267	AGFG1	ArfGAP with FG repeats 1	NM_001135187	551	790	+
3267	AGFG1	ArfGAP with FG repeats 1	NM_001135187	1904	2223	+
8226	HDHD1	haloacid dehalogenase-like hydrolase domain containing 1	NM_001135565	881	1130	+
221710	SMIM13	small integral membrane protein 13	NM_001135575	1321	1470	+
134553	C5orf24	chromosome 5 open reading frame 24	NM_001135586	311	679	+
134553	C5orf24	chromosome 5 open reading frame 24	NM_001135586	2686	2886	+
55704	CCDC88A	coiled-coil domain containing 88A	NM_001135597	1971	2120	+
55704	CCDC88A	coiled-coil domain containing 88A	NM_001135597	3021	3530	+
55704	CCDC88A	coiled-coil domain containing 88A	NM_001135597	3831	4010	+
55704	CCDC88A	coiled-coil domain containing 88A	NM_001135597	5961	6180	+
55704	CCDC88A	coiled-coil domain containing 88A	NM_001135597	6621	6820	+
129285	PPP1R21	protein phosphatase 1, regulatory subunit 21	NM_001135629	631	870	+
129285	PPP1R21	protein phosphatase 1, regulatory subunit 21	NM_001135629	1871	2040	+
129285	PPP1R21	protein phosphatase 1, regulatory subunit 21	NM_001135629	2361	2524	+
8394	PIP5K1A	phosphatidylinositol-4-phosphate 5-kinase, type I, alpha	NM_001135638	291	440	+
8394	PIP5K1A	phosphatidylinositol-4-phosphate 5-kinase, type I, alpha	NM_001135638	1071	1328	+
8394	PIP5K1A	phosphatidylinositol-4-phosphate 5-kinase, type I, alpha	NM_001135638	2361	2599	+
51164	DCTN4	dynactin 4 (p62)	NM_001135644	1441	1810	+
51307	FAM53C	family with sequence similarity 53, member C	NM_001135647	301	480	+
51307	FAM53C	family with sequence similarity 53, member C	NM_001135647	711	1130	+
51307	FAM53C	family with sequence similarity 53, member C	NM_001135647	1211	1330	+
51307	FAM53C	family with sequence similarity 53, member C	NM_001135647	1509	1947	+
8761	PABPC4	poly(A) binding protein, cytoplasmic 4 (inducible form)	NM_001135653	91	300	+
8761	PABPC4	poly(A) binding protein, cytoplasmic 4 (inducible form)	NM_001135653	1545	1825	+
8934	RAB29	RAB29, member RAS oncogene family	NM_001135663	1761	2032	+
7419	VDAC3	voltage-dependent anion channel 3	NM_001135694	1001	1230	+
94241	TP53INP1	tumor protein p53 inducible nuclear protein 1	NM_001135733	40	610	+
94241	TP53INP1	tumor protein p53 inducible nuclear protein 1	NM_001135733	661	1139	+
94241	TP53INP1	tumor protein p53 inducible nuclear protein 1	NM_001135733	5191	5410	+
171017	ZNF384	zinc finger protein 384	NM_001135734	1891	2030	+
171017	ZNF384	zinc finger protein 384	NM_001135734	2201	2340	+
11319	ECD	ecdysoneless homolog (Drosophila)	NM_001135752	2111	2287	+
58516	FAM60A	family with sequence similarity 60, member A	NM_001135811	27	167	+
58516	FAM60A	family with sequence similarity 60, member A	NM_001135811	501	810	+
58516	FAM60A	family with sequence similarity 60, member A	NM_001135811	861	1081	+
100132247	NPIPB5	nuclear pore complex interacting protein family, member B5	NM_001135865	731	830	+
100132247	NPIPB5	nuclear pore complex interacting protein family, member B5	NM_001135865	941	1140	+
100132247	NPIPB5	nuclear pore complex interacting protein family, member B5	NM_001135865	3591	3771	+
125488	TTC39C	tetratricopeptide repeat domain 39C	NM_001135993	657	849	+
125488	TTC39C	tetratricopeptide repeat domain 39C	NM_001135993	971	1120	+
125488	TTC39C	tetratricopeptide repeat domain 39C	NM_001135993	2171	2410	+
125488	TTC39C	tetratricopeptide repeat domain 39C	NM_001135993	2881	3018	+
2618	GART	phosphoribosylglycinamide formyltransferase, phosphoribosylglycinamide synthetase, phosphoribosylaminoimidazole synthetase	NM_001136005_2	1411	1610	+
2618	GART	phosphoribosylglycinamide formyltransferase, phosphoribosylglycinamide synthetase, phosphoribosylaminoimidazole synthetase	NM_001136005_2	2501	2730	+
2618	GART	phosphoribosylglycinamide formyltransferase, phosphoribosylglycinamide synthetase, phosphoribosylaminoimidazole synthetase	NM_001136005_2	3171	3527	+
9840	TESPA1	thymocyte expressed, positive selection associated 1	NM_001136030	1011	1280	+
55657	ZNF692	zinc finger protein 692	NM_001136036	911	1090	+
55657	ZNF692	zinc finger protein 692	NM_001136036	1985	2190	+
81556	VWA9	von Willebrand factor A domain containing 9	NM_001136043	1551	2221	+
131601	TPRA1	transmembrane protein, adipocyte asscociated 1	NM_001136053	1455	1660	+
203069	R3HCC1	R3H domain and coiled-coil containing 1	NM_001136108	521	1020	+
10585	POMT1	protein-O-mannosyltransferase 1	NM_001136113	1861	2000	+
10585	POMT1	protein-O-mannosyltransferase 1	NM_001136113	2561	2765	+
6158	RPL28	ribosomal protein L28	NM_001136134	548	688	+
22847	ZNF507	zinc finger protein 507	NM_001136156	861	960	+
22847	ZNF507	zinc finger protein 507	NM_001136156	1487	1730	+
22847	ZNF507	zinc finger protein 507	NM_001136156	2791	3000	+
22847	ZNF507	zinc finger protein 507	NM_001136156	3041	3380	+
22868	FASTKD2	FAST kinase domains 2	NM_001136194	431	1170	+
30000	TNPO2	transportin 2	NM_001136195	4961	5065	+
55758	RCOR3	REST corepressor 3	NM_001136223	1266	1460	+
55758	RCOR3	REST corepressor 3	NM_001136223	1671	2072	+
552889	ATXN7L3B	ataxin 7-like 3B	NM_001136262	63	260	+
552889	ATXN7L3B	ataxin 7-like 3B	NM_001136262	581	790	+
552889	ATXN7L3B	ataxin 7-like 3B	NM_001136262	971	1370	+
552889	ATXN7L3B	ataxin 7-like 3B	NM_001136262	1591	1900	+
126917	IFFO2	intermediate filament family orphan 2	NM_001136265	1601	1810	+
255809	C19orf38	chromosome 19 open reading frame 38	NM_001136482	761	1050	+
84879	MFSD2A	major facilitator superfamily domain containing 2A	NM_001136493	1931	2070	+
80724	ACAD10	acyl-CoA dehydrogenase family, member 10	NM_001136538	2351	2510	+
80724	ACAD10	acyl-CoA dehydrogenase family, member 10	NM_001136538	3551	3790	+
80724	ACAD10	acyl-CoA dehydrogenase family, member 10	NM_001136538	3811	4100	+
57720	GPR107	G protein-coupled receptor 107	NM_001136557	1941	2254	+
57720	GPR107	G protein-coupled receptor 107	NM_001136557	2363	2620	+
57720	GPR107	G protein-coupled receptor 107	NM_001136557	4021	4510	+
9208	LRRFIP1	leucine rich repeat (in FLII) interacting protein 1	NM_001137552	1161	1420	+
9208	LRRFIP1	leucine rich repeat (in FLII) interacting protein 1	NM_001137552	1671	1860	+
9208	LRRFIP1	leucine rich repeat (in FLII) interacting protein 1	NM_001137552	2071	2240	+
9208	LRRFIP1	leucine rich repeat (in FLII) interacting protein 1	NM_001137552	2561	2760	+
342371	ATXN1L	ataxin 1-like	NM_001137675	151	380	+
342371	ATXN1L	ataxin 1-like	NM_001137675	401	620	+
342371	ATXN1L	ataxin 1-like	NM_001137675	1038	2270	+
342371	ATXN1L	ataxin 1-like	NM_001137675	2461	2650	+
10134	BCAP31	B-cell receptor-associated protein 31	NM_001139457	1047	1290	+
25780	RASGRP3	RAS guanyl releasing protein 3 (calcium and DAG-regulated)	NM_001139488	1639	1870	+
25780	RASGRP3	RAS guanyl releasing protein 3 (calcium and DAG-regulated)	NM_001139488	2514	3085	+
8575	PRKRA	protein kinase, interferon-inducible double stranded RNA dependent activator	NM_001139517	313	435	+
8575	PRKRA	protein kinase, interferon-inducible double stranded RNA dependent activator	NM_001139517	1231	1380	+
59	ACTA2	actin, alpha 2, smooth muscle, aorta	NM_001141945	341	500	+
1616	DAXX	death-domain associated protein	NM_001141969_5	861	1021	+
1616	DAXX	death-domain associated protein	NM_001141969_5	1491	1740	+
1616	DAXX	death-domain associated protein	NM_001141969_5	1791	1970	+
79621	RNASEH2B	ribonuclease H2, subunit B	NM_001142279	801	940	+
79621	RNASEH2B	ribonuclease H2, subunit B	NM_001142279	1201	1360	+
6229	RPS24	ribosomal protein S24	NM_001142285	361	535	+
79677	SMC6	structural maintenance of chromosomes 6	NM_001142286	931	1110	+
79677	SMC6	structural maintenance of chromosomes 6	NM_001142286	1141	1340	+
79677	SMC6	structural maintenance of chromosomes 6	NM_001142286	2451	3080	+
79677	SMC6	structural maintenance of chromosomes 6	NM_001142286	3571	3747	+
23295	MGRN1	mahogunin ring finger 1, E3 ubiquitin protein ligase	NM_001142290	4391	4750	+
8878	SQSTM1	sequestosome 1	NM_001142298	861	1080	+
151195	CCNYL1	cyclin Y-like 1	NM_001142300	1371	1560	+
2965	GTF2H1	general transcription factor IIH, polypeptide 1, 62kDa	NM_001142307	2371	2596	+
5532	PPP3CB	protein phosphatase 3, catalytic subunit, beta isozyme	NM_001142353	311	470	+
5532	PPP3CB	protein phosphatase 3, catalytic subunit, beta isozyme	NM_001142353	1573	1980	+
5532	PPP3CB	protein phosphatase 3, catalytic subunit, beta isozyme	NM_001142353	3001	3151	+
5165	PDK3	pyruvate dehydrogenase kinase, isozyme 3	NM_001142386	1361	2086	+
5165	PDK3	pyruvate dehydrogenase kinase, isozyme 3	NM_001142386	8121	8308	+
5165	PDK3	pyruvate dehydrogenase kinase, isozyme 3	NM_001142386	12611	12766	+
4739	NEDD9	neural precursor cell expressed, developmentally down-regulated 9	NM_001142393	2031	2210	+
4739	NEDD9	neural precursor cell expressed, developmentally down-regulated 9	NM_001142393	2561	2908	+
9811	CTIF	CBP80/20-dependent translation initiation factor	NM_001142397	2181	2350	+
9643	MORF4L2	mortality factor 4 like 2	NM_001142418	471	690	+
9643	MORF4L2	mortality factor 4 like 2	NM_001142418	701	1063	+
80153	EDC3	enhancer of mRNA decapping 3	NM_001142443	991	1190	+
80153	EDC3	enhancer of mRNA decapping 3	NM_001142443	1741	1980	+
9315	NREP	neuronal regeneration related protein	NM_001142483	641	1038	+
63901	FAM111A	family with sequence similarity 111, member A	NM_001142520	641	1100	+
63901	FAM111A	family with sequence similarity 111, member A	NM_001142520	1231	1610	+
63901	FAM111A	family with sequence similarity 111, member A	NM_001142520	1621	1810	+
26271	FBXO5	F-box protein 5	NM_001142522	421	770	+
26271	FBXO5	F-box protein 5	NM_001142522	811	1060	+
56987	BBX	bobby sox homolog (Drosophila)	NM_001142568	1241	1533	+
56987	BBX	bobby sox homolog (Drosophila)	NM_001142568	1671	1810	+
56987	BBX	bobby sox homolog (Drosophila)	NM_001142568	1901	2400	+
56987	BBX	bobby sox homolog (Drosophila)	NM_001142568	3151	3370	+
56987	BBX	bobby sox homolog (Drosophila)	NM_001142568	6501	6600	+
56987	BBX	bobby sox homolog (Drosophila)	NM_001142568	6841	7160	+
55765	C1orf106	chromosome 1 open reading frame 106	NM_001142569	3571	3810	+
5033	P4HA1	prolyl 4-hydroxylase, alpha polypeptide I	NM_001142595	451	636	+
5033	P4HA1	prolyl 4-hydroxylase, alpha polypeptide I	NM_001142595	1047	1270	+
100131211	TMEM194B	transmembrane protein 194B	NM_001142645	1311	1570	+
56681	SAR1A	secretion associated, Ras related GTPase 1A	NM_001142648	14	160	+
56681	SAR1A	secretion associated, Ras related GTPase 1A	NM_001142648	650	903	+
56681	SAR1A	secretion associated, Ras related GTPase 1A	NM_001142648	904	1175	+
90417	KNSTRN	kinetochore-localized astrin/SPAG5 binding protein	NM_001142761	1341	1500	+
9780	PIEZO1	piezo-type mechanosensitive ion channel component 1	NM_001142864	3931	4040	+
9780	PIEZO1	piezo-type mechanosensitive ion channel component 1	NM_001142864	4071	4190	+
9780	PIEZO1	piezo-type mechanosensitive ion channel component 1	NM_001142864	5621	5810	+
9780	PIEZO1	piezo-type mechanosensitive ion channel component 1	NM_001142864	7531	7787	+
8539	API5	apoptosis inhibitor 5	NM_001142930	1651	1939	+
8539	API5	apoptosis inhibitor 5	NM_001142930	3251	3380	+
25874	MPC2	mitochondrial pyruvate carrier 2	NM_001143674	721	824	+
115752	DIS3L	DIS3 like exosome 3'-5' exoribonuclease	NM_001143688	1721	2080	+
115752	DIS3L	DIS3 like exosome 3'-5' exoribonuclease	NM_001143688	2921	3190	+
51629	SLC25A39	solute carrier family 25, member 39	NM_001143780	1501	1601	+
51303	FKBP11	FK506 binding protein 11, 19 kDa	NM_001143782	651	800	+
53373	TPCN1	two pore segment channel 1	NM_001143819	371	510	+
53373	TPCN1	two pore segment channel 1	NM_001143819	2731	2830	+
53373	TPCN1	two pore segment channel 1	NM_001143819	2841	3080	+
53373	TPCN1	two pore segment channel 1	NM_001143819	3201	3390	+
53373	TPCN1	two pore segment channel 1	NM_001143819	5201	5310	+
7541	ZBTB14	zinc finger and BTB domain containing 14	NM_001143823	1811	1976	+
10982	MAPRE2	microtubule-associated protein, RP/EB family, member 2	NM_001143827	1131	1400	+
2620	GAS2	growth arrest-specific 2	NM_001143830	1151	1320	+
4798	NFRKB	nuclear factor related to kappaB binding protein	NM_001143835	3441	3650	+
79022	TMEM106C	transmembrane protein 106C	NM_001143842	911	1080	+
9318	COPS2	COP9 signalosome subunit 2	NM_001143887	151	320	+
9318	COPS2	COP9 signalosome subunit 2	NM_001143887	1280	1790	+
10906	TRAFD1	TRAF-type zinc finger domain containing 1	NM_001143906	853	1410	+
145853	C15orf61	chromosome 15 open reading frame 61	NM_001143936	351	550	+
81491	GPR63	G protein-coupled receptor 63	NM_001143957	1621	1800	+
54820	NDE1	nudE neurodevelopment protein 1	NM_001143979	1981	2140	+
8045	RASSF7	Ras association (RalGDS/AF-6) domain family (N-terminal) member 7	NM_001143993	1361	1720	+
267	AMFR	autocrine motility factor receptor, E3 ubiquitin protein ligase	NM_001144	2091	2500	+
267	AMFR	autocrine motility factor receptor, E3 ubiquitin protein ligase	NM_001144	2601	2741	+
267	AMFR	autocrine motility factor receptor, E3 ubiquitin protein ligase	NM_001144	2861	3129	+
27158	NDOR1	NADPH dependent diflavin oxidoreductase 1	NM_001144026	4731	4870	+
23228	PLCL2	phospholipase C-like 2	NM_001144382	2111	2360	+
667	DST	dystonin	NM_001144769	5261	5470	+
667	DST	dystonin	NM_001144769	5601	5810	+
667	DST	dystonin	NM_001144769	5971	6100	+
667	DST	dystonin	NM_001144769	7051	7246	+
667	DST	dystonin	NM_001144769	8441	8750	+
667	DST	dystonin	NM_001144769	9101	9350	+
667	DST	dystonin	NM_001144769	9621	9810	+
667	DST	dystonin	NM_001144769	9981	10220	+
667	DST	dystonin	NM_001144769	11591	11770	+
667	DST	dystonin	NM_001144769	16961	17140	+
965	CD58	CD58 molecule	NM_001144822	501	797	+
10260	DENND4A	DENN/MADD domain containing 4A	NM_001144823	3201	3351	+
10260	DENND4A	DENN/MADD domain containing 4A	NM_001144823	3493	4241	+
10260	DENND4A	DENN/MADD domain containing 4A	NM_001144823	5731	6020	+
11331	PHB2	prohibitin 2	NM_001144831	91	190	+
79930	DOK3	docking protein 3	NM_001144875	1981	2110	+
5693	PSMB5	proteasome (prosome, macropain) subunit, beta type, 5	NM_001144932	1071	1270	+
730051	ZNF814	zinc finger protein 814	NM_001144989	561	828	+
730051	ZNF814	zinc finger protein 814	NM_001144989	2061	2340	+
10783	NEK6	NIMA-related kinase 6	NM_001145001	1431	1620	+
10783	NEK6	NIMA-related kinase 6	NM_001145001	2151	2440	+
11119	BTN3A1	butyrophilin, subfamily 3, member A1	NM_001145009	1191	1310	+
11119	BTN3A1	butyrophilin, subfamily 3, member A1	NM_001145009	1721	1860	+
11119	BTN3A1	butyrophilin, subfamily 3, member A1	NM_001145009	2271	2539	+
11119	BTN3A1	butyrophilin, subfamily 3, member A1	NM_001145009	3441	3580	+
90507	SCRN2	secernin 2	NM_001145023	1251	1360	+
57511	COG6	component of oligomeric golgi complex 6	NM_001145079	131	260	+
57511	COG6	component of oligomeric golgi complex 6	NM_001145079	381	570	+
8031	NCOA4	nuclear receptor coactivator 4	NM_001145260	1254	1884	+
8031	NCOA4	nuclear receptor coactivator 4	NM_001145260	3611	3730	+
23265	EXOC7	exocyst complex component 7	NM_001145297	2641	2780	+
23265	EXOC7	exocyst complex component 7	NM_001145297	4321	4440	+
23265	EXOC7	exocyst complex component 7	NM_001145297	4611	4879	+
1021	CDK6	cyclin-dependent kinase 6	NM_001145306	80	280	+
1021	CDK6	cyclin-dependent kinase 6	NM_001145306	429	760	+
1021	CDK6	cyclin-dependent kinase 6	NM_001145306	1341	2183	+
1021	CDK6	cyclin-dependent kinase 6	NM_001145306	6901	7040	+
83856	FSD1L	fibronectin type III and SPRY domain containing 1-like	NM_001145313	748	890	+
83856	FSD1L	fibronectin type III and SPRY domain containing 1-like	NM_001145313	1843	2090	+
83856	FSD1L	fibronectin type III and SPRY domain containing 1-like	NM_001145313	1102	1437	+
83856	FSD1L	fibronectin type III and SPRY domain containing 1-like	NM_001145313	5941	6061	+
4289	MKLN1	muskelin 1, intracellular mediator containing kelch motifs	NM_001145354	221	470	+
4289	MKLN1	muskelin 1, intracellular mediator containing kelch motifs	NM_001145354	891	1080	+
4289	MKLN1	muskelin 1, intracellular mediator containing kelch motifs	NM_001145354	2271	2550	+
4289	MKLN1	muskelin 1, intracellular mediator containing kelch motifs	NM_001145354	10501	10700	+
25942	SIN3A	SIN3 transcription regulator family member A	NM_001145358	2751	2870	+
25942	SIN3A	SIN3 transcription regulator family member A	NM_001145358	4393	4733	+
22834	ZNF652	zinc finger protein 652	NM_001145365	421	660	+
22834	ZNF652	zinc finger protein 652	NM_001145365	711	1270	+
22834	ZNF652	zinc finger protein 652	NM_001145365	2351	2670	+
80746	TSEN2	TSEN2 tRNA splicing endonuclease subunit	NM_001145395	761	1029	+
80746	TSEN2	TSEN2 tRNA splicing endonuclease subunit	NM_001145395	1071	1221	+
4841	NONO	non-POU domain containing, octamer-binding	NM_001145408	699	890	+
9869	SETDB1	SET domain, bifurcated 1	NM_001145415	1951	2280	+
9869	SETDB1	SET domain, bifurcated 1	NM_001145415	2701	3123	+
9805	SCRN1	secernin 1	NM_001145513	371	610	+
9805	SCRN1	secernin 1	NM_001145513	1290	1560	+
9805	SCRN1	secernin 1	NM_001145513	2471	2719	+
9805	SCRN1	secernin 1	NM_001145513	4161	4420	+
84991	RBM17	RNA binding motif protein 17	NM_001145547	1851	1996	+
55625	ZDHHC7	zinc finger, DHHC-type containing 7	NM_001145548	1331	1730	+
55625	ZDHHC7	zinc finger, DHHC-type containing 7	NM_001145548	1741	1990	+
55625	ZDHHC7	zinc finger, DHHC-type containing 7	NM_001145548	2799	3061	+
9711	KIAA0226	KIAA0226	NM_001145642	1251	1410	+
9711	KIAA0226	KIAA0226	NM_001145642	3281	3402	+
9711	KIAA0226	KIAA0226	NM_001145642	3417	3600	+
9711	KIAA0226	KIAA0226	NM_001145642	3693	4113	+
57711	ZNF529	zinc finger protein 529	NM_001145649	551	1656	+
2734	GLG1	golgi glycoprotein 1	NM_001145667	2591	2770	+
2734	GLG1	golgi glycoprotein 1	NM_001145667	3447	4220	+
2734	GLG1	golgi glycoprotein 1	NM_001145667	4231	4750	+
6452	SH3BP2	SH3-domain binding protein 2	NM_001145855	871	1470	+
6452	SH3BP2	SH3-domain binding protein 2	NM_001145855	1916	2240	+
6452	SH3BP2	SH3-domain binding protein 2	NM_001145855	2281	2440	+
6452	SH3BP2	SH3-domain binding protein 2	NM_001145855	3391	3490	+
6452	SH3BP2	SH3-domain binding protein 2	NM_001145855	5021	5140	+
54938	SARS2	seryl-tRNA synthetase 2, mitochondrial	NM_001145901	1901	2060	+
79595	SAP130	Sin3A-associated protein, 130kDa	NM_001145928	3141	3425	+
79595	SAP130	Sin3A-associated protein, 130kDa	NM_001145928	3481	3914	+
83666	PARP9	poly (ADP-ribose) polymerase family, member 9	NM_001146106	671	1130	+
83666	PARP9	poly (ADP-ribose) polymerase family, member 9	NM_001146106	1811	2131	+
57708	MIER1	mesoderm induction early response 1, transcriptional regulator	NM_001146110	576	748	+
57708	MIER1	mesoderm induction early response 1, transcriptional regulator	NM_001146110	851	1350	+
57708	MIER1	mesoderm induction early response 1, transcriptional regulator	NM_001146110	1536	1919	+
128387	TATDN3	TatD DNase domain containing 3	NM_001146171	871	1070	+
64786	TBC1D15	TBC1 domain family, member 15	NM_001146214	157	290	+
64786	TBC1D15	TBC1 domain family, member 15	NM_001146214	961	1250	+
9904	RBM19	RNA binding motif protein 19	NM_001146699	2171	2380	+
9904	RBM19	RNA binding motif protein 19	NM_001146699	4221	4466	+
60592	SCOC	short coiled-coil protein	NM_001153585	291	589	+
60592	SCOC	short coiled-coil protein	NM_001153585	891	1040	+
308	ANXA5	annexin A5	NM_001154	401	780	+
308	ANXA5	annexin A5	NM_001154	1489	1590	+
309	ANXA6	annexin A6	NM_001155	2241	2341	+
309	ANXA6	annexin A6	NM_001155	2481	2586	+
64779	MTHFSD	methenyltetrahydrofolate synthetase domain containing	NM_001159377	1411	1670	+
10492	SYNCRIP	synaptotagmin binding, cytoplasmic RNA interacting protein	NM_001159677	1	164	+
10492	SYNCRIP	synaptotagmin binding, cytoplasmic RNA interacting protein	NM_001159677	831	1020	+
10492	SYNCRIP	synaptotagmin binding, cytoplasmic RNA interacting protein	NM_001159677	1331	1590	+
10492	SYNCRIP	synaptotagmin binding, cytoplasmic RNA interacting protein	NM_001159677	1621	1900	+
10492	SYNCRIP	synaptotagmin binding, cytoplasmic RNA interacting protein	NM_001159677	1965	2457	+
10492	SYNCRIP	synaptotagmin binding, cytoplasmic RNA interacting protein	NM_001159677	3471	3721	+
10492	SYNCRIP	synaptotagmin binding, cytoplasmic RNA interacting protein	NM_001159677	4581	4734	+
4049	LTA	lymphotoxin alpha	NM_001159740_6	1171	1443	+
29	ABR	active BCR-related	NM_001159746	2991	3260	+
29	ABR	active BCR-related	NM_001159746	4791	4940	+
29	ABR	active BCR-related	NM_001159746	5081	5340	+
55856	ACOT13	acyl-CoA thioesterase 13	NM_001160094	812	1041	+
56479	KCNQ5	potassium channel, voltage gated KQT-like subfamily Q, member 5	NM_001160133	2691	3230	+
80821	DDHD1	DDHD domain containing 1	NM_001160148	401	520	+
80821	DDHD1	DDHD domain containing 1	NM_001160148	581	760	+
80821	DDHD1	DDHD domain containing 1	NM_001160148	831	1000	+
80821	DDHD1	DDHD domain containing 1	NM_001160148	1061	1230	+
80821	DDHD1	DDHD domain containing 1	NM_001160148	1421	1570	+
80821	DDHD1	DDHD domain containing 1	NM_001160148	2797	3072	+
80821	DDHD1	DDHD domain containing 1	NM_001160148	3076	3340	+
80821	DDHD1	DDHD domain containing 1	NM_001160148	4181	4590	+
80821	DDHD1	DDHD domain containing 1	NM_001160148	6081	6240	+
80821	DDHD1	DDHD domain containing 1	NM_001160148	9761	9920	+
80821	DDHD1	DDHD domain containing 1	NM_001160148	11771	12888	+
7697	ZNF138	zinc finger protein 138	NM_001160183	591	700	+
81790	RNF170	ring finger protein 170	NM_001160223	1231	1415	+
476	ATP1A1	ATPase, Na+/K+ transporting, alpha 1 polypeptide	NM_001160233	871	1020	+
476	ATP1A1	ATPase, Na+/K+ transporting, alpha 1 polypeptide	NM_001160233	3571	3760	+
1268	CNR1	cannabinoid receptor 1 (brain)	NM_001160258	691	790	+
1268	CNR1	cannabinoid receptor 1 (brain)	NM_001160258	1681	1860	+
79918	SETD6	SET domain containing 6	NM_001160305	1241	1440	+
220002	CYB561A3	cytochrome b561 family, member A3	NM_001161454	151	359	+
220002	CYB561A3	cytochrome b561 family, member A3	NM_001161454	2951	3150	+
25886	POC1A	POC1 centriolar protein A	NM_001161581	1581	1783	+
5527	PPP2R5C	protein phosphatase 2, regulatory subunit B', gamma	NM_001161725	1341	1518	+
5527	PPP2R5C	protein phosphatase 2, regulatory subunit B', gamma	NM_001161725	1831	2010	+
191	AHCY	adenosylhomocysteinase	NM_001161766	691	830	+
191	AHCY	adenosylhomocysteinase	NM_001161766	2111	2238	+
191	AHCY	adenosylhomocysteinase	NM_001161766	2239	2369	+
9181	ARHGEF2	Rho/Rac guanine nucleotide exchange factor (GEF) 2	NM_001162383	3011	3340	+
1195	CLK1	CDC-like kinase 1	NM_001162407	440	1020	+
10015	PDCD6IP	programmed cell death 6 interacting protein	NM_001162429	1481	1703	+
10015	PDCD6IP	programmed cell death 6 interacting protein	NM_001162429	2261	2560	+
10015	PDCD6IP	programmed cell death 6 interacting protein	NM_001162429	2671	3116	+
23112	TNRC6B	trinucleotide repeat containing 6B	NM_001162501	231	360	+
23112	TNRC6B	trinucleotide repeat containing 6B	NM_001162501	981	2650	+
23112	TNRC6B	trinucleotide repeat containing 6B	NM_001162501	4931	5070	+
23112	TNRC6B	trinucleotide repeat containing 6B	NM_001162501	5601	6021	+
23112	TNRC6B	trinucleotide repeat containing 6B	NM_001162501	17941	18060	+
494115	RBMXL1	RNA binding motif protein, X-linked-like 1	NM_001162536	166	320	+
494115	RBMXL1	RNA binding motif protein, X-linked-like 1	NM_001162536	921	1100	+
494115	RBMXL1	RNA binding motif protein, X-linked-like 1	NM_001162536	1790	1923	+
9674	KIAA0040	KIAA0040	NM_001162893	971	1240	+
27336	HTATSF1	HIV-1 Tat specific factor 1	NM_001163280	1091	1200	+
27336	HTATSF1	HIV-1 Tat specific factor 1	NM_001163280	1791	2046	+
27336	HTATSF1	HIV-1 Tat specific factor 1	NM_001163280	2421	2684	+
155061	ZNF746	zinc finger protein 746	NM_001163474	2061	2427	+
56652	C10orf2	chromosome 10 open reading frame 2	NM_001163812	401	562	+
55291	PPP6R3	protein phosphatase 6, regulatory subunit 3	NM_001164160	901	1130	+
55291	PPP6R3	protein phosphatase 6, regulatory subunit 3	NM_001164160	1561	1690	+
55291	PPP6R3	protein phosphatase 6, regulatory subunit 3	NM_001164160	2111	2353	+
55291	PPP6R3	protein phosphatase 6, regulatory subunit 3	NM_001164160	2541	2720	+
55291	PPP6R3	protein phosphatase 6, regulatory subunit 3	NM_001164160	2961	3115	+
23143	LRCH1	leucine-rich repeats and calponin homology (CH) domain containing 1	NM_001164211	1471	1663	+
23143	LRCH1	leucine-rich repeats and calponin homology (CH) domain containing 1	NM_001164211	2021	2160	+
23269	MGA	MGA, MAX dimerization protein	NM_001164273	971	1070	+
23269	MGA	MGA, MAX dimerization protein	NM_001164273	1841	1970	+
23269	MGA	MGA, MAX dimerization protein	NM_001164273	8931	9400	+
2542	SLC37A4	solute carrier family 37 (glucose-6-phosphate transporter), member 4	NM_001164277	211	340	+
2542	SLC37A4	solute carrier family 37 (glucose-6-phosphate transporter), member 4	NM_001164277	511	900	+
2542	SLC37A4	solute carrier family 37 (glucose-6-phosphate transporter), member 4	NM_001164277	2481	2600	+
375248	ANKRD36	ankyrin repeat domain 36	NM_001164315	4911	5030	+
375248	ANKRD36	ankyrin repeat domain 36	NM_001164315	5341	5490	+
375248	ANKRD36	ankyrin repeat domain 36	NM_001164315	5641	5790	+
2317	FLNB	filamin B, beta	NM_001164317	931	1100	+
2317	FLNB	filamin B, beta	NM_001164317	3481	3780	+
2317	FLNB	filamin B, beta	NM_001164317	7951	8091	+
2317	FLNB	filamin B, beta	NM_001164317	8291	8490	+
2317	FLNB	filamin B, beta	NM_001164317	9371	9550	+
51184	GPN3	GPN-loop GTPase 3	NM_001164372	1001	1150	+
27067	STAU2	staufen double-stranded RNA binding protein 2	NM_001164384	731	920	+
51735	RAPGEF6	Rap guanine nucleotide exchange factor (GEF) 6	NM_001164386	101	281	+
51735	RAPGEF6	Rap guanine nucleotide exchange factor (GEF) 6	NM_001164386	1291	1490	+
51735	RAPGEF6	Rap guanine nucleotide exchange factor (GEF) 6	NM_001164386	2851	3040	+
51735	RAPGEF6	Rap guanine nucleotide exchange factor (GEF) 6	NM_001164386	4300	4880	+
51735	RAPGEF6	Rap guanine nucleotide exchange factor (GEF) 6	NM_001164386	4961	5387	+
651746	ANKRD33B	ankyrin repeat domain 33B	NM_001164440	1271	1390	+
651746	ANKRD33B	ankyrin repeat domain 33B	NM_001164440	1511	1780	+
651746	ANKRD33B	ankyrin repeat domain 33B	NM_001164440	3331	3650	+
651746	ANKRD33B	ankyrin repeat domain 33B	NM_001164440	4131	4330	+
651746	ANKRD33B	ankyrin repeat domain 33B	NM_001164440	6541	6640	+
651746	ANKRD33B	ankyrin repeat domain 33B	NM_001164440	7761	8060	+
651746	ANKRD33B	ankyrin repeat domain 33B	NM_001164440	8651	8800	+
5724	PTAFR	platelet-activating factor receptor	NM_001164723	811	920	+
5724	PTAFR	platelet-activating factor receptor	NM_001164723	1451	1940	+
393	ARHGAP4	Rho GTPase activating protein 4	NM_001164741	531	730	+
113444	SMIM12	small integral membrane protein 12	NM_001164824	480	1036	+
330	BIRC3	baculoviral IAP repeat containing 3	NM_001165	711	917	+
330	BIRC3	baculoviral IAP repeat containing 3	NM_001165	2745	3060	+
330	BIRC3	baculoviral IAP repeat containing 3	NM_001165	3191	3580	+
330	BIRC3	baculoviral IAP repeat containing 3	NM_001165	3921	4470	+
51522	TMEM14C	transmembrane protein 14C	NM_001165258	726	950	+
3939	LDHA	lactate dehydrogenase A	NM_001165414	1792	1936	+
6241	RRM2	ribonucleotide reductase M2	NM_001165931	381	560	+
6241	RRM2	ribonucleotide reductase M2	NM_001165931	1271	1539	+
100101467	ZSCAN30	zinc finger and SCAN domain containing 30	NM_001166012	1321	1560	+
100101467	ZSCAN30	zinc finger and SCAN domain containing 30	NM_001166012	1931	2110	+
10908	PNPLA6	patatin-like phospholipase domain containing 6	NM_001166111	269	465	+
10908	PNPLA6	patatin-like phospholipase domain containing 6	NM_001166111	4441	4565	+
51251	NT5C3A	5'-nucleotidase, cytosolic IIIA	NM_001166118	1091	1503	+
4720	NDUFS2	NADH dehydrogenase (ubiquinone) Fe-S protein 2, 49kDa (NADH-coenzyme Q reductase)	NM_001166159	256	440	+
10574	CCT7	chaperonin containing TCP1, subunit 7 (eta)	NM_001166285	221	320	+
29969	MDFIC	MyoD family inhibitor domain containing	NM_001166345	91	250	+
29969	MDFIC	MyoD family inhibitor domain containing	NM_001166345	871	1040	+
29969	MDFIC	MyoD family inhibitor domain containing	NM_001166345	1141	1391	+
29969	MDFIC	MyoD family inhibitor domain containing	NM_001166345	1991	2432	+
55869	HDAC8	histone deacetylase 8	NM_001166419	272	420	+
64743	WDR13	WD repeat domain 13	NM_001166426	51	235	+
6566	SLC16A1	solute carrier family 16 (monocarboxylate transporter), member 1	NM_001166496	1321	1910	+
6566	SLC16A1	solute carrier family 16 (monocarboxylate transporter), member 1	NM_001166496	2071	2510	+
159090	FAM122B	family with sequence similarity 122B	NM_001166599	391	580	+
159090	FAM122B	family with sequence similarity 122B	NM_001166599	1091	1220	+
159090	FAM122B	family with sequence similarity 122B	NM_001166599	3229	3394	+
159090	FAM122B	family with sequence similarity 122B	NM_001166599	3861	4000	+
5213	PFKM	phosphofructokinase, muscle	NM_001166686	1521	1660	+
7272	TTK	TTK protein kinase	NM_001166691	1141	1360	+
7272	TTK	TTK protein kinase	NM_001166691	2651	2840	+
331	XIAP	X-linked inhibitor of apoptosis, E3 ubiquitin protein ligase	NM_001167	491	830	+
79886	CAAP1	caspase activity and apoptosis inhibitor 1	NM_001167575	37	200	+
79886	CAAP1	caspase activity and apoptosis inhibitor 1	NM_001167575	961	1370	+
84236	RHBDD1	rhomboid domain containing 1	NM_001167608	481	910	+
84236	RHBDD1	rhomboid domain containing 1	NM_001167608	1351	1500	+
84236	RHBDD1	rhomboid domain containing 1	NM_001167608	1921	2250	+
57176	VARS2	valyl-tRNA synthetase 2, mitochondrial	NM_001167734_5	781	920	+
57176	VARS2	valyl-tRNA synthetase 2, mitochondrial	NM_001167734_5	3311	3610	+
345778	MTX3	metaxin 3	NM_001167741	861	1240	+
345778	MTX3	metaxin 3	NM_001167741	5551	5684	+
10904	BLCAP	bladder cancer associated protein	NM_001167820	1771	2159	+
50999	TMED5	transmembrane emp24 protein transport domain containing 5	NM_001167830	965	1311	+
50999	TMED5	transmembrane emp24 protein transport domain containing 5	NM_001167830	771	921	+
50999	TMED5	transmembrane emp24 protein transport domain containing 5	NM_001167830	2171	2320	+
55206	SBNO1	strawberry notch homolog 1 (Drosophila)	NM_001167856	281	769	+
55206	SBNO1	strawberry notch homolog 1 (Drosophila)	NM_001167856	961	1110	+
55206	SBNO1	strawberry notch homolog 1 (Drosophila)	NM_001167856	1831	1990	+
55206	SBNO1	strawberry notch homolog 1 (Drosophila)	NM_001167856	2051	2330	+
55206	SBNO1	strawberry notch homolog 1 (Drosophila)	NM_001167856	2791	2950	+
55206	SBNO1	strawberry notch homolog 1 (Drosophila)	NM_001167856	3401	3550	+
55206	SBNO1	strawberry notch homolog 1 (Drosophila)	NM_001167856	4061	4370	+
55101	ATP5SL	ATP5S-like	NM_001167867	1611	1766	+
3708	ITPR1	inositol 1,4,5-trisphosphate receptor, type 1	NM_001168272	2341	2495	+
3708	ITPR1	inositol 1,4,5-trisphosphate receptor, type 1	NM_001168272	3751	3870	+
3708	ITPR1	inositol 1,4,5-trisphosphate receptor, type 1	NM_001168272	5874	6072	+
3708	ITPR1	inositol 1,4,5-trisphosphate receptor, type 1	NM_001168272	6641	6800	+
3708	ITPR1	inositol 1,4,5-trisphosphate receptor, type 1	NM_001168272	8471	8638	+
9820	CUL7	cullin 7	NM_001168370	301	620	+
9820	CUL7	cullin 7	NM_001168370	751	950	+
9820	CUL7	cullin 7	NM_001168370	1571	1720	+
9820	CUL7	cullin 7	NM_001168370	2021	2280	+
9820	CUL7	cullin 7	NM_001168370	4296	4540	+
64860	ARMCX5	armadillo repeat containing, X-linked 5	NM_001168479	751	1145	+
57620	STIM2	stromal interaction molecule 2	NM_001169117	3261	3430	+
401152	C4orf3	chromosome 4 open reading frame 3	NM_001170330	621	820	+
5128	CDK17	cyclin-dependent kinase 17	NM_001170464	2304	2885	+
192111	PGAM5	phosphoglycerate mutase family member 5	NM_001170543	911	1360	+
63932	CXorf56	chromosome X open reading frame 56	NM_001170569	621	860	+
57680	CHD8	chromodomain helicase DNA binding protein 8	NM_001170629	16	390	+
57680	CHD8	chromodomain helicase DNA binding protein 8	NM_001170629	1501	1640	+
57680	CHD8	chromodomain helicase DNA binding protein 8	NM_001170629	6081	6360	+
57680	CHD8	chromodomain helicase DNA binding protein 8	NM_001170629	7591	8200	+
55796	MBNL3	muscleblind-like splicing regulator 3	NM_001170704	1241	1420	+
284565	NBPF15	neuroblastoma breakpoint family, member 15	NM_001170755	3111	3450	+
84975	MFSD5	major facilitator superfamily domain containing 5	NM_001170790	1861	2000	+
728927	ZNF736	zinc finger protein 736	NM_001170905	471	1723	+
728927	ZNF736	zinc finger protein 736	NM_001170905	6066	6220	+
9203	ZMYM3	zinc finger, MYM-type 3	NM_001171162	781	1470	+
9203	ZMYM3	zinc finger, MYM-type 3	NM_001171162	1571	1740	+
9203	ZMYM3	zinc finger, MYM-type 3	NM_001171162	5321	5450	+
23125	CAMTA2	calmodulin binding transcription activator 2	NM_001171167	3141	3250	+
51271	UBAP1	ubiquitin associated protein 1	NM_001171203	751	1420	+
51271	UBAP1	ubiquitin associated protein 1	NM_001171203	1801	1970	+
90411	MCFD2	multiple coagulation factor deficiency 2	NM_001171508	531	1040	+
90411	MCFD2	multiple coagulation factor deficiency 2	NM_001171508	1061	1160	+
90411	MCFD2	multiple coagulation factor deficiency 2	NM_001171508	1171	1320	+
90411	MCFD2	multiple coagulation factor deficiency 2	NM_001171508	2891	3040	+
7422	VEGFA	vascular endothelial growth factor A	NM_001171623	2179	2330	+
7422	VEGFA	vascular endothelial growth factor A	NM_001171623	2451	2580	+
9949	AMMECR1	Alport syndrome, mental retardation, midface hypoplasia and elliptocytosis chromosomal region gene 1	NM_001171689	3331	3500	+
286144	TRIQK	triple QxxK/R motif containing	NM_001171796	471	620	+
286144	TRIQK	triple QxxK/R motif containing	NM_001171796	661	790	+
115992	RNF166	ring finger protein 166	NM_001171816	1351	1490	+
5467	PPARD	peroxisome proliferator-activated receptor delta	NM_001171818	1641	1870	+
5467	PPARD	peroxisome proliferator-activated receptor delta	NM_001171818	2202	2480	+
4205	MEF2A	myocyte enhancer factor 2A	NM_001171894	521	890	+
4205	MEF2A	myocyte enhancer factor 2A	NM_001171894	1818	2182	+
4205	MEF2A	myocyte enhancer factor 2A	NM_001171894	2411	2670	+
4205	MEF2A	myocyte enhancer factor 2A	NM_001171894	2691	2808	+
4205	MEF2A	myocyte enhancer factor 2A	NM_001171894	4763	4980	+
4205	MEF2A	myocyte enhancer factor 2A	NM_001171894	5571	5693	+
5828	PEX2	peroxisomal biogenesis factor 2	NM_001172086	351	700	+
5828	PEX2	peroxisomal biogenesis factor 2	NM_001172086	821	974	+
3055	HCK	HCK proto-oncogene, Src family tyrosine kinase	NM_001172132	1961	2140	+
81532	MOB2	MOB kinase activator 2	NM_001172223	951	1090	+
84930	MASTL	microtubule associated serine/threonine kinase-like	NM_001172303	550	660	+
84930	MASTL	microtubule associated serine/threonine kinase-like	NM_001172303	1668	2246	+
84930	MASTL	microtubule associated serine/threonine kinase-like	NM_001172303	2361	2500	+
573	BAG1	BCL2-associated athanogene	NM_001172415	331	530	+
573	BAG1	BCL2-associated athanogene	NM_001172415	751	860	+
22930	RAB3GAP1	RAB3 GTPase activating protein subunit 1 (catalytic)	NM_001172435	1582	1979	+
22930	RAB3GAP1	RAB3 GTPase activating protein subunit 1 (catalytic)	NM_001172435	2161	2339	+
22930	RAB3GAP1	RAB3 GTPase activating protein subunit 1 (catalytic)	NM_001172435	2581	2730	+
22930	RAB3GAP1	RAB3 GTPase activating protein subunit 1 (catalytic)	NM_001172435	2751	3249	+
4615	MYD88	myeloid differentiation primary response 88	NM_001172567	1211	1510	+
79648	MCPH1	microcephalin 1	NM_001172574	1181	1300	+
79648	MCPH1	microcephalin 1	NM_001172574	1371	1530	+
79648	MCPH1	microcephalin 1	NM_001172574	1701	1940	+
10658	CELF1	CUGBP, Elav-like family member 1	NM_001172640	1371	1550	+
10658	CELF1	CUGBP, Elav-like family member 1	NM_001172640	1641	1935	+
10658	CELF1	CUGBP, Elav-like family member 1	NM_001172640	3121	3410	+
10658	CELF1	CUGBP, Elav-like family member 1	NM_001172640	3971	4090	+
10658	CELF1	CUGBP, Elav-like family member 1	NM_001172640	5861	6050	+
10658	CELF1	CUGBP, Elav-like family member 1	NM_001172640	6321	6600	+
10102	TSFM	Ts translation elongation factor, mitochondrial	NM_001172696	281	422	+
10102	TSFM	Ts translation elongation factor, mitochondrial	NM_001172696	955	1203	+
1982	EIF4G2	eukaryotic translation initiation factor 4 gamma, 2	NM_001172705	631	787	+
1982	EIF4G2	eukaryotic translation initiation factor 4 gamma, 2	NM_001172705	1991	2200	+
147694	ZNF548	zinc finger protein 548	NM_001172773	701	1404	+
147694	ZNF548	zinc finger protein 548	NM_001172773	437	700	+
147694	ZNF548	zinc finger protein 548	NM_001172773	1511	2027	+
5236	PGM1	phosphoglucomutase 1	NM_001172818	520	700	+
5236	PGM1	phosphoglucomutase 1	NM_001172818	1531	1660	+
5236	PGM1	phosphoglucomutase 1	NM_001172818	1961	2225	+
55605	KIF21A	kinesin family member 21A	NM_001173464	2161	2361	+
55605	KIF21A	kinesin family member 21A	NM_001173464	2751	2880	+
55605	KIF21A	kinesin family member 21A	NM_001173464	3271	3390	+
6738	TROVE2	TROVE domain family, member 2	NM_001173524	372	640	+
6738	TROVE2	TROVE domain family, member 2	NM_001173524	1011	1170	+
6738	TROVE2	TROVE domain family, member 2	NM_001173524	2091	2210	+
29117	BRD7	bromodomain containing 7	NM_001173984	321	510	+
29117	BRD7	bromodomain containing 7	NM_001173984	851	1200	+
55684	RABL6	RAB, member RAS oncogene family-like 6	NM_001173988	2251	2406	+
55684	RABL6	RAB, member RAS oncogene family-like 6	NM_001173988	2711	2810	+
9887	SMG7	SMG7 nonsense mediated mRNA decay factor	NM_001174061	1771	2238	+
9887	SMG7	SMG7 nonsense mediated mRNA decay factor	NM_001174061	2431	2530	+
9887	SMG7	SMG7 nonsense mediated mRNA decay factor	NM_001174061	2641	2870	+
9887	SMG7	SMG7 nonsense mediated mRNA decay factor	NM_001174061	3331	3440	+
9887	SMG7	SMG7 nonsense mediated mRNA decay factor	NM_001174061	3751	3900	+
9887	SMG7	SMG7 nonsense mediated mRNA decay factor	NM_001174061	3941	4150	+
9887	SMG7	SMG7 nonsense mediated mRNA decay factor	NM_001174061	4801	5180	+
27343	POLL	polymerase (DNA directed), lambda	NM_001174084	2064	2390	+
27343	POLL	polymerase (DNA directed), lambda	NM_001174084	2671	2786	+
100381270	ZBED6	zinc finger, BED-type containing 6	NM_001174108	111	240	+
100381270	ZBED6	zinc finger, BED-type containing 6	NM_001174108	951	1050	+
100381270	ZBED6	zinc finger, BED-type containing 6	NM_001174108	1381	1640	+
100381270	ZBED6	zinc finger, BED-type containing 6	NM_001174108	2751	2922	+
23312	DMXL2	Dmx-like 2	NM_001174116	3951	4050	+
23312	DMXL2	Dmx-like 2	NM_001174116	4571	4760	+
23312	DMXL2	Dmx-like 2	NM_001174116	5771	5960	+
23312	DMXL2	Dmx-like 2	NM_001174116	6271	6670	+
4891	SLC11A2	solute carrier family 11 (proton-coupled divalent metal ion transporter), member 2	NM_001174129	2869	3040	+
397	ARHGDIB	Rho GDP dissociation inhibitor (GDI) beta	NM_001175	37	240	+
400	ARL1	ADP-ribosylation factor-like 1	NM_001177	541	710	+
55183	RIF1	replication timing regulatory factor 1	NM_001177665	4061	4320	+
55183	RIF1	replication timing regulatory factor 1	NM_001177665	4671	5200	+
55183	RIF1	replication timing regulatory factor 1	NM_001177665	5241	5733	+
55183	RIF1	replication timing regulatory factor 1	NM_001177665	5831	6250	+
55183	RIF1	replication timing regulatory factor 1	NM_001177665	6351	6940	+
55183	RIF1	replication timing regulatory factor 1	NM_001177665	7491	7891	+
29098	RANGRF	RAN guanine nucleotide release factor	NM_001177802	29	180	+
29098	RANGRF	RAN guanine nucleotide release factor	NM_001177802	961	1136	+
8318	CDC45	cell division cycle 45	NM_001178010	531	688	+
5096	PCCB	propionyl CoA carboxylase, beta polypeptide	NM_001178014	62	220	+
5096	PCCB	propionyl CoA carboxylase, beta polypeptide	NM_001178014	466	670	+
5096	PCCB	propionyl CoA carboxylase, beta polypeptide	NM_001178014	1652	1870	+
79668	PARP8	poly (ADP-ribose) polymerase family, member 8	NM_001178055	401	685	+
79668	PARP8	poly (ADP-ribose) polymerase family, member 8	NM_001178055	1106	1583	+
79668	PARP8	poly (ADP-ribose) polymerase family, member 8	NM_001178055	2421	2570	+
79668	PARP8	poly (ADP-ribose) polymerase family, member 8	NM_001178055	2651	2804	+
6778	STAT6	signal transducer and activator of transcription 6, interleukin-4 induced	NM_001178078	61	220	+
6778	STAT6	signal transducer and activator of transcription 6, interleukin-4 induced	NM_001178078	2731	3050	+
2132	EXT2	exostosin glycosyltransferase 2	NM_001178083	2851	2970	+
7543	ZFX	zinc finger protein, X-linked	NM_001178085	501	1020	+
7543	ZFX	zinc finger protein, X-linked	NM_001178085	1698	2865	+
930	CD19	CD19 molecule	NM_001178098	43	160	+
7029	TFDP2	transcription factor Dp-2 (E2F dimerization partner 2)	NM_001178138	1081	1260	+
255743	NPNT	nephronectin	NM_001184691	1191	1450	+
255743	NPNT	nephronectin	NM_001184691	1861	2100	+
255743	NPNT	nephronectin	NM_001184691	3391	3590	+
255743	NPNT	nephronectin	NM_001184691	4231	4360	+
3033	HADH	hydroxyacyl-CoA dehydrogenase	NM_001184705	361	610	+
3033	HADH	hydroxyacyl-CoA dehydrogenase	NM_001184705	1551	1750	+
114836	SLAMF6	SLAM family member 6	NM_001184714	1211	1519	+
114836	SLAMF6	SLAM family member 6	NM_001184714	1804	2090	+
114836	SLAMF6	SLAM family member 6	NM_001184714	2541	2688	+
25976	TIPARP	TCDD-inducible poly(ADP-ribose) polymerase	NM_001184717	511	1460	+
25976	TIPARP	TCDD-inducible poly(ADP-ribose) polymerase	NM_001184717	1968	2320	+
10009	ZBTB33	zinc finger and BTB domain containing 33	NM_001184742	321	450	+
10009	ZBTB33	zinc finger and BTB domain containing 33	NM_001184742	891	1090	+
10009	ZBTB33	zinc finger and BTB domain containing 33	NM_001184742	1111	2390	+
54470	ARMCX6	armadillo repeat containing, X-linked 6	NM_001184768	383	570	+
54470	ARMCX6	armadillo repeat containing, X-linked 6	NM_001184768	591	775	+
23344	ESYT1	extended synaptotagmin-like protein 1	NM_001184796	1241	1440	+
23344	ESYT1	extended synaptotagmin-like protein 1	NM_001184796	3941	4080	+
23344	ESYT1	extended synaptotagmin-like protein 1	NM_001184796	4151	4270	+
54552	GNL3L	guanine nucleotide binding protein-like 3 (nucleolar)-like	NM_001184819	401	610	+
[truncated: 10,848 more rows]
