# Supplementary material for: Evolution of transcript modification by N6-methyladenosine in primates
Source: HighWire-hosted journal article supplement (doi:10.1101/gr.212563.116), 2017-01-04
Supplement: Supplemental_Table_S2.xlsx [file Supplemental_Table_S2.xlsx]

## Sheet: sTable2.H2Peaks
GID	Symbol	Description	RefSeq_NM	Start	End	Strand
35	ACADS	acyl-CoA dehydrogenase, C-2 to C-3 short chain	NM_000017	1274	1560	+
35	ACADS	acyl-CoA dehydrogenase, C-2 to C-3 short chain	NM_000017	1801	1910	+
38	ACAT1	acetyl-CoA acetyltransferase 1	NM_000019	811	940	+
5663	PSEN1	presenilin 1	NM_000021	71	230	+
5663	PSEN1	presenilin 1	NM_000021	381	530	+
5663	PSEN1	presenilin 1	NM_000021	1231	1390	+
5663	PSEN1	presenilin 1	NM_000021	1694	2236	+
100	ADA	adenosine deaminase	NM_000022	41	170	+
158	ADSL	adenylosuccinate lyase	NM_000026	1191	1360	+
178	AGL	amylo-alpha-1, 6-glucosidase, 4-alpha-glucanotransferase	NM_000028	2911	3080	+
178	AGL	amylo-alpha-1, 6-glucosidase, 4-alpha-glucanotransferase	NM_000028	4151	4450	+
226	ALDOA	aldolase A, fructose-bisphosphate	NM_000034	2261	2382	+
355	FAS	Fas cell surface death receptor	NM_000043	1101	1400	+
472	ATM	ATM serine/threonine kinase	NM_000051	611	760	+
472	ATM	ATM serine/threonine kinase	NM_000051	4211	4380	+
472	ATM	ATM serine/threonine kinase	NM_000051	6351	6630	+
472	ATM	ATM serine/threonine kinase	NM_000051	7191	7590	+
472	ATM	ATM serine/threonine kinase	NM_000051	8201	8370	+
472	ATM	ATM serine/threonine kinase	NM_000051	9342	9631	+
472	ATM	ATM serine/threonine kinase	NM_000051	12307	12470	+
472	ATM	ATM serine/threonine kinase	NM_000051	12544	12800	+
538	ATP7A	ATPase, Cu++ transporting, alpha polypeptide	NM_000052	361	730	+
538	ATP7A	ATPase, Cu++ transporting, alpha polypeptide	NM_000052	1261	1432	+
538	ATP7A	ATPase, Cu++ transporting, alpha polypeptide	NM_000052	4479	4790	+
538	ATP7A	ATPase, Cu++ transporting, alpha polypeptide	NM_000052	5021	5300	+
675	BRCA2	breast cancer 2, early onset	NM_000059	9971	10170	+
1019	CDK4	cyclin-dependent kinase 4	NM_000075	1131	1476	+
1371	CPOX	coproporphyrinogen oxidase	NM_000097	139	680	+
1371	CPOX	coproporphyrinogen oxidase	NM_000097	691	820	+
1371	CPOX	coproporphyrinogen oxidase	NM_000097	1181	1290	+
1371	CPOX	coproporphyrinogen oxidase	NM_000097	1321	1499	+
1376	CPT2	carnitine palmitoyltransferase 2	NM_000098	1401	1530	+
1535	CYBA	cytochrome b-245, alpha polypeptide	NM_000101	51	170	+
1535	CYBA	cytochrome b-245, alpha polypeptide	NM_000101	501	720	+
1643	DDB2	damage-specific DNA binding protein 2, 48kDa	NM_000107	89	340	+
1643	DDB2	damage-specific DNA binding protein 2, 48kDa	NM_000107	1421	1840	+
1738	DLD	dihydrolipoamide dehydrogenase	NM_000108	61	180	+
1738	DLD	dihydrolipoamide dehydrogenase	NM_000108	641	780	+
1738	DLD	dihydrolipoamide dehydrogenase	NM_000108	1321	1610	+
1861	TOR1A	torsin family 1, member A (torsin A)	NM_000113	891	1160	+
6901	TAZ	tafazzin	NM_000116	1101	1680	+
2022	ENG	endoglin	NM_000118	2501	3020	+
2071	ERCC3	excision repair cross-complementation group 3	NM_000122	44	330	+
2073	ERCC5	excision repair cross-complementation group 5	NM_000123	1561	2160	+
2073	ERCC5	excision repair cross-complementation group 5	NM_000123	3391	3830	+
2073	ERCC5	excision repair cross-complementation group 5	NM_000123	3951	4074	+
2074	ERCC6	excision repair cross-complementation group 6	NM_000124	1101	1570	+
2074	ERCC6	excision repair cross-complementation group 6	NM_000124	3711	3940	+
2074	ERCC6	excision repair cross-complementation group 6	NM_000124	4471	4630	+
2108	ETFA	electron-transfer-flavoprotein, alpha polypeptide	NM_000126	38	220	+
2176	FANCC	Fanconi anemia, complementation group C	NM_000136	1821	1960	+
2176	FANCC	Fanconi anemia, complementation group C	NM_000136	4221	4390	+
2184	FAH	fumarylacetoacetate hydrolase (fumarylacetoacetase)	NM_000137	924	1118	+
2271	FH	fumarate hydratase	NM_000143	1421	1590	+
2512	FTL	ferritin, light polypeptide	NM_000146	741	869	+
2517	FUCA1	fucosidase, alpha-L- 1, tissue	NM_000147	1366	1810	+
2548	GAA	glucosidase, alpha; acid	NM_000152	3581	3763	+
2632	GBE1	glucan (1,4-alpha-), branching enzyme 1	NM_000158	203	470	+
2632	GBE1	glucan (1,4-alpha-), branching enzyme 1	NM_000158	1101	1260	+
2632	GBE1	glucan (1,4-alpha-), branching enzyme 1	NM_000158	1551	1800	+
2639	GCDH	glutaryl-CoA dehydrogenase	NM_000159	1407	1762	+
2643	GCH1	GTP cyclohydrolase 1	NM_000161	1	360	+
2643	GCH1	GTP cyclohydrolase 1	NM_000161	1911	2010	+
2643	GCH1	GTP cyclohydrolase 1	NM_000161	2141	2270	+
2696	GIPR	gastric inhibitory polypeptide receptor	NM_000164	1435	1880	+
2717	GLA	galactosidase, alpha	NM_000169	1171	1379	+
2731	GLDC	glycine dehydrogenase (decarboxylating)	NM_000170	21	220	+
2731	GLDC	glycine dehydrogenase (decarboxylating)	NM_000170	3201	3390	+
2937	GSS	glutathione synthetase	NM_000178	7	200	+
2937	GSS	glutathione synthetase	NM_000178	1181	1320	+
2937	GSS	glutathione synthetase	NM_000178	1741	1897	+
2956	MSH6	mutS homolog 6	NM_000179	674	1070	+
2956	MSH6	mutS homolog 6	NM_000179	1355	1710	+
2956	MSH6	mutS homolog 6	NM_000179	2820	3380	+
2990	GUSB	glucuronidase, beta	NM_000181	561	750	+
2990	GUSB	glucuronidase, beta	NM_000181	2021	2283	+
3030	HADHA	hydroxyacyl-CoA dehydrogenase/3-ketoacyl-CoA thiolase/enoyl-CoA hydratase (trifunctional protein), alpha subunit	NM_000182	491	680	+
3030	HADHA	hydroxyacyl-CoA dehydrogenase/3-ketoacyl-CoA thiolase/enoyl-CoA hydratase (trifunctional protein), alpha subunit	NM_000182	801	1120	+
3030	HADHA	hydroxyacyl-CoA dehydrogenase/3-ketoacyl-CoA thiolase/enoyl-CoA hydratase (trifunctional protein), alpha subunit	NM_000182	2621	2804	+
3099	HK2	hexokinase 2	NM_000189	1721	1850	+
3099	HK2	hexokinase 2	NM_000189	3321	3530	+
3099	HK2	hexokinase 2	NM_000189	4571	4940	+
3099	HK2	hexokinase 2	NM_000189	5011	5190	+
3099	HK2	hexokinase 2	NM_000189	5331	5436	+
3145	HMBS	hydroxymethylbilane synthase	NM_000190	1321	1500	+
3155	HMGCL	3-hydroxymethyl-3-methylglutaryl-CoA lyase	NM_000191	965	1595	+
3251	HPRT1	hypoxanthine phosphoribosyltransferase 1	NM_000194	54	270	+
3257	HPS1	Hermansky-Pudlak syndrome 1	NM_000195	30	150	+
6448	SGSH	N-sulfoglucosamine sulfohydrolase	NM_000199	1271	1490	+
6448	SGSH	N-sulfoglucosamine sulfohydrolase	NM_000199	1741	2000	+
3383	ICAM1	intercellular adhesion molecule 1	NM_000201	1754	2414	+
3383	ICAM1	intercellular adhesion molecule 1	NM_000201	2561	2790	+
3423	IDS	iduronate 2-sulfatase	NM_000202	1334	1795	+
3423	IDS	iduronate 2-sulfatase	NM_000202	4201	4672	+
3423	IDS	iduronate 2-sulfatase	NM_000202	5471	5590	+
3561	IL2RG	interleukin 2 receptor, gamma	NM_000206	66	210	+
3561	IL2RG	interleukin 2 receptor, gamma	NM_000206	1351	1499	+
3643	INSR	insulin receptor	NM_000208	3991	4220	+
3643	INSR	insulin receptor	NM_000208	5711	6070	+
3689	ITGB2	integrin, beta 2 (complement component 3 receptor 3 and 4 subunit)	NM_000211	2661	2911	+
182	JAG1	jagged 1	NM_000214	3941	4270	+
3718	JAK3	Janus kinase 3	NM_000215	1611	1850	+
3718	JAK3	Janus kinase 3	NM_000215	3331	3520	+
3718	JAK3	Janus kinase 3	NM_000215	4881	5020	+
3718	JAK3	Janus kinase 3	NM_000215	5161	5412	+
3978	LIG1	ligase I, DNA, ATP-dependent	NM_000234	297	640	+
3978	LIG1	ligase I, DNA, ATP-dependent	NM_000234	751	1240	+
3978	LIG1	ligase I, DNA, ATP-dependent	NM_000234	2081	2260	+
3988	LIPA	lipase A, lysosomal acid, cholesterol esterase	NM_000235	221	380	+
3988	LIPA	lipase A, lysosomal acid, cholesterol esterase	NM_000235	1211	1625	+
4292	MLH1	mutL homolog 1	NM_000249	1381	1730	+
4436	MSH2	mutS homolog 2	NM_000251	2701	2850	+
4548	MTR	5-methyltetrahydrofolate-homocysteine methyltransferase	NM_000254	4101	4800	+
4548	MTR	5-methyltetrahydrofolate-homocysteine methyltransferase	NM_000254	5721	5940	+
4548	MTR	5-methyltetrahydrofolate-homocysteine methyltransferase	NM_000254	6911	7083	+
4548	MTR	5-methyltetrahydrofolate-homocysteine methyltransferase	NM_000254	7861	8010	+
4548	MTR	5-methyltetrahydrofolate-homocysteine methyltransferase	NM_000254	10201	10430	+
4644	MYO5A	myosin VA (heavy chain 12, myoxin)	NM_000259	3301	3440	+
4644	MYO5A	myosin VA (heavy chain 12, myoxin)	NM_000259	4251	4490	+
4644	MYO5A	myosin VA (heavy chain 12, myoxin)	NM_000259	4501	4640	+
4644	MYO5A	myosin VA (heavy chain 12, myoxin)	NM_000259	5691	6020	+
4668	NAGA	N-acetylgalactosaminidase, alpha-	NM_000262	1941	2160	+
4669	NAGLU	N-acetylglucosaminidase, alpha	NM_000263	2011	2380	+
4669	NAGLU	N-acetylglucosaminidase, alpha	NM_000263	2551	2730	+
653361	NCF1	neutrophil cytosolic factor 1	NM_000265	441	570	+
4860	PNP	purine nucleoside phosphorylase	NM_000270	51	210	+
4860	PNP	purine nucleoside phosphorylase	NM_000270	1261	1492	+
4864	NPC1	Niemann-Pick disease, type C1	NM_000271	1511	1840	+
4864	NPC1	Niemann-Pick disease, type C1	NM_000271	3991	4505	+
5190	PEX6	peroxisomal biogenesis factor 6	NM_000287	432	992	+
5190	PEX6	peroxisomal biogenesis factor 6	NM_000287	3221	3362	+
5256	PHKA2	phosphorylase kinase, alpha 2 (liver)	NM_000292	3931	4630	+
5261	PHKG2	phosphorylase kinase, gamma 2 (testis)	NM_000294	1124	1696	+
5311	PKD2	polycystic kidney disease 2 (autosomal dominant)	NM_000297	2661	2960	+
5351	PLOD1	procollagen-lysine, 2-oxoglutarate 5-dioxygenase 1	NM_000302	2171	3000	+
5373	PMM2	phosphomannomutase 2	NM_000303	1761	1900	+
5373	PMM2	phosphomannomutase 2	NM_000303	2091	2290	+
5538	PPT1	palmitoyl-protein thioesterase 1	NM_000310	253	390	+
5538	PPT1	palmitoyl-protein thioesterase 1	NM_000310	2361	2483	+
5621	PRNP	prion protein	NM_000311	701	920	+
5728	PTEN	phosphatase and tensin homolog	NM_000314	167	280	+
5728	PTEN	phosphatase and tensin homolog	NM_000314	471	910	+
5728	PTEN	phosphatase and tensin homolog	NM_000314	921	1120	+
5728	PTEN	phosphatase and tensin homolog	NM_000314	1291	1540	+
5728	PTEN	phosphatase and tensin homolog	NM_000314	1831	2050	+
5860	QDPR	quinoid dihydropteridine reductase	NM_000320	132	340	+
5925	RB1	retinoblastoma 1	NM_000321	101	520	+
5925	RB1	retinoblastoma 1	NM_000321	891	1030	+
5925	RB1	retinoblastoma 1	NM_000321	1231	1560	+
5925	RB1	retinoblastoma 1	NM_000321	1851	2290	+
5925	RB1	retinoblastoma 1	NM_000321	2450	3048	+
6310	ATXN1	ataxin 1	NM_000332	811	1040	+
6310	ATXN1	ataxin 1	NM_000332	1161	1260	+
6310	ATXN1	ataxin 1	NM_000332	1681	1880	+
6310	ATXN1	ataxin 1	NM_000332	3044	3483	+
6310	ATXN1	ataxin 1	NM_000332	6561	6690	+
6310	ATXN1	ataxin 1	NM_000332	10161	10260	+
6314	ATXN7	ataxin 7	NM_000333	1401	1580	+
6314	ATXN7	ataxin 7	NM_000333	1701	1870	+
6314	ATXN7	ataxin 7	NM_000333	2281	3500	+
6314	ATXN7	ataxin 7	NM_000333	5061	5257	+
6314	ATXN7	ataxin 7	NM_000333	6981	7158	+
6606	SMN1	survival of motor neuron 1, telomeric	NM_000344	1181	1360	+
6662	SOX9	SRY (sex determining region Y)-box 9	NM_000346	2020	2269	+
6662	SOX9	SRY (sex determining region Y)-box 9	NM_000346	1621	1986	+
412	STS	steroid sulfatase (microsomal), isozyme S	NM_000351	1711	2160	+
412	STS	steroid sulfatase (microsomal), isozyme S	NM_000351	2171	2350	+
412	STS	steroid sulfatase (microsomal), isozyme S	NM_000351	3371	3480	+
7248	TSC1	tuberous sclerosis 1	NM_000368	1851	2180	+
7248	TSC1	tuberous sclerosis 1	NM_000368	3461	4040	+
7248	TSC1	tuberous sclerosis 1	NM_000368	6831	7590	+
7248	TSC1	tuberous sclerosis 1	NM_000368	7611	7740	+
7248	TSC1	tuberous sclerosis 1	NM_000368	7954	8370	+
7372	UMPS	uridine monophosphate synthetase	NM_000373	441	1040	+
7389	UROD	uroporphyrinogen decarboxylase	NM_000374	106	250	+
7390	UROS	uroporphyrinogen III synthase	NM_000375	1123	1347	+
642	BLMH	bleomycin hydrolase	NM_000386	1654	1919	+
788	SLC25A20	solute carrier family 25 (carnitine/acylcarnitine translocase), member 20	NM_000387	1151	1300	+
788	SLC25A20	solute carrier family 25 (carnitine/acylcarnitine translocase), member 20	NM_000387	1531	1730	+
1121	CHM	choroideremia (Rab escort protein 1)	NM_000390	1961	2130	+
1200	TPP1	tripeptidyl peptidase I	NM_000391	1801	1960	+
1200	TPP1	tripeptidyl peptidase I	NM_000391	2821	3000	+
1439	CSF2RB	colony stimulating factor 2 receptor, beta, low-affinity (granulocyte-macrophage)	NM_000395	1881	2090	+
1439	CSF2RB	colony stimulating factor 2 receptor, beta, low-affinity (granulocyte-macrophage)	NM_000395	2181	2340	+
1439	CSF2RB	colony stimulating factor 2 receptor, beta, low-affinity (granulocyte-macrophage)	NM_000395	2661	2830	+
1439	CSF2RB	colony stimulating factor 2 receptor, beta, low-affinity (granulocyte-macrophage)	NM_000395	3311	3470	+
1536	CYBB	cytochrome b-245, beta polypeptide	NM_000397	1751	1930	+
1536	CYBB	cytochrome b-245, beta polypeptide	NM_000397	3174	3410	+
1959	EGR2	early growth response 2	NM_000399	1051	1330	+
1959	EGR2	early growth response 2	NM_000399	1511	1610	+
1959	EGR2	early growth response 2	NM_000399	1691	1860	+
2539	G6PD	glucose-6-phosphate dehydrogenase	NM_000402	2231	2390	+
2720	GLB1	galactosidase, beta 1	NM_000404	1627	1821	+
2720	GLB1	galactosidase, beta 1	NM_000404	1931	2280	+
2760	GM2A	GM2 ganglioside activator	NM_000405	136	280	+
2760	GM2A	GM2 ganglioside activator	NM_000405	841	1050	+
2760	GM2A	GM2 ganglioside activator	NM_000405	1451	1550	+
2760	GM2A	GM2 ganglioside activator	NM_000405	2411	2539	+
3459	IFNGR1	interferon gamma receptor 1	NM_000416	1291	1540	+
5048	PAFAH1B1	platelet-activating factor acetylhydrolase 1b, regulatory subunit 1 (45kDa)	NM_000430	20	266	+
5048	PAFAH1B1	platelet-activating factor acetylhydrolase 1b, regulatory subunit 1 (45kDa)	NM_000430	551	770	+
5048	PAFAH1B1	platelet-activating factor acetylhydrolase 1b, regulatory subunit 1 (45kDa)	NM_000430	1411	1510	+
5048	PAFAH1B1	platelet-activating factor acetylhydrolase 1b, regulatory subunit 1 (45kDa)	NM_000430	5071	5496	+
4598	MVK	mevalonate kinase	NM_000431	1491	1690	+
4758	NEU1	sialidase 1 (lysosomal sialidase)	NM_000434_4	1351	1909	+
5019	OXCT1	3-oxoacid CoA transferase 1	NM_000436	711	870	+
5019	OXCT1	3-oxoacid CoA transferase 1	NM_000436	2891	3110	+
5051	PAFAH2	platelet-activating factor acetylhydrolase 2, 40kDa	NM_000437	1431	1880	+
5993	RFX5	regulatory factor X, 5 (influences HLA class II expression)	NM_000449	1011	1180	+
5993	RFX5	regulatory factor X, 5 (influences HLA class II expression)	NM_000449	1421	1690	+
6794	STK11	serine/threonine kinase 11	NM_000455	651	1250	+
6821	SUOX	sulfite oxidase	NM_000456	1191	1420	+
6821	SUOX	sulfite oxidase	NM_000456	1561	1700	+
6821	SUOX	sulfite oxidase	NM_000456	1761	1930	+
6928	HNF1B	HNF1 homeobox B	NM_000458	2101	2370	+
7337	UBE3A	ubiquitin protein ligase E3A	NM_000462	1431	1580	+
7337	UBE3A	ubiquitin protein ligase E3A	NM_000462	1814	2154	+
7337	UBE3A	ubiquitin protein ligase E3A	NM_000462	3271	3460	+
580	BARD1	BRCA1 associated RING domain 1	NM_000465	571	960	+
580	BARD1	BRCA1 associated RING domain 1	NM_000465	1341	1480	+
580	BARD1	BRCA1 associated RING domain 1	NM_000465	2131	2350	+
203	AK1	adenylate kinase 1	NM_000476	751	906	+
275	AMT	aminomethyltransferase	NM_000481	1911	2200	+
351	APP	amyloid beta (A4) precursor protein	NM_000484	771	1050	+
351	APP	amyloid beta (A4) precursor protein	NM_000484	1381	1620	+
353	APRT	adenine phosphoribosyltransferase	NM_000485	691	800	+
410	ARSA	arylsulfatase A	NM_000487	41	190	+
410	ARSA	arylsulfatase A	NM_000487	1641	1750	+
410	ARSA	arylsulfatase A	NM_000487	2011	2300	+
546	ATRX	alpha thalassemia/mental retardation syndrome X-linked	NM_000489	2451	2660	+
546	ATRX	alpha thalassemia/mental retardation syndrome X-linked	NM_000489	2701	3030	+
546	ATRX	alpha thalassemia/mental retardation syndrome X-linked	NM_000489	3061	3270	+
546	ATRX	alpha thalassemia/mental retardation syndrome X-linked	NM_000489	3401	3930	+
546	ATRX	alpha thalassemia/mental retardation syndrome X-linked	NM_000489	4111	4480	+
546	ATRX	alpha thalassemia/mental retardation syndrome X-linked	NM_000489	4491	4910	+
546	ATRX	alpha thalassemia/mental retardation syndrome X-linked	NM_000489	6041	6220	+
546	ATRX	alpha thalassemia/mental retardation syndrome X-linked	NM_000489	7021	7120	+
546	ATRX	alpha thalassemia/mental retardation syndrome X-linked	NM_000489	7601	7736	+
1415	CRYBB2	crystallin, beta B2	NM_000496	621	760	+
2588	GALNS	galactosamine (N-acetyl)-6-sulfatase	NM_000512	1701	1980	+
3073	HEXA	hexosaminidase A (alpha polypeptide)	NM_000520	1921	2020	+
3949	LDLR	low density lipoprotein receptor	NM_000527	2761	3120	+
3949	LDLR	low density lipoprotein receptor	NM_000527	3371	3530	+
3949	LDLR	low density lipoprotein receptor	NM_000527	4611	4770	+
3949	LDLR	low density lipoprotein receptor	NM_000527	5061	5248	+
4125	MAN2B1	mannosidase, alpha, class 2B, member 1	NM_000528	141	310	+
4125	MAN2B1	mannosidase, alpha, class 2B, member 1	NM_000528	3111	3218	+
5378	PMS1	PMS1 postmeiotic segregation increased 1 (S. cerevisiae)	NM_000534	1841	2080	+
5378	PMS1	PMS1 postmeiotic segregation increased 1 (S. cerevisiae)	NM_000534	2351	2631	+
5395	PMS2	PMS2 postmeiotic segregation increased 2 (S. cerevisiae)	NM_000535	1421	2090	+
5395	PMS2	PMS2 postmeiotic segregation increased 2 (S. cerevisiae)	NM_000535	2541	2770	+
5994	RFXAP	regulatory factor X-associated protein	NM_000538	325	535	+
5994	RFXAP	regulatory factor X-associated protein	NM_000538	801	1040	+
7249	TSC2	tuberous sclerosis 2	NM_000548	4271	4740	+
7249	TSC2	tuberous sclerosis 2	NM_000548	5271	5623	+
7428	VHL	von Hippel-Lindau tumor suppressor, E3 ubiquitin protein ligase	NM_000551	166	600	+
7428	VHL	von Hippel-Lindau tumor suppressor, E3 ubiquitin protein ligase	NM_000551	681	1100	+
7428	VHL	von Hippel-Lindau tumor suppressor, E3 ubiquitin protein ligase	NM_000551	1281	1460	+
7428	VHL	von Hippel-Lindau tumor suppressor, E3 ubiquitin protein ligase	NM_000551	2801	2951	+
7486	WRN	Werner syndrome, RecQ helicase-like	NM_000553	1641	1820	+
7486	WRN	Werner syndrome, RecQ helicase-like	NM_000553	4941	5159	+
6890	TAP1	transporter 1, ATP-binding cassette, sub-family B (MDR/TAP)	NM_000593_8	291	480	+
6890	TAP1	transporter 1, ATP-binding cassette, sub-family B (MDR/TAP)	NM_000593_8	2622	2927	+
7124	TNF	tumor necrosis factor	NM_000594_7	11	170	+
7124	TNF	tumor necrosis factor	NM_000594_7	901	1120	+
960	CD44	CD44 molecule (Indian blood group)	NM_000610	323	520	+
960	CD44	CD44 molecule (Indian blood group)	NM_000610	931	1104	+
960	CD44	CD44 molecule (Indian blood group)	NM_000610	2229	2410	+
960	CD44	CD44 molecule (Indian blood group)	NM_000610	2441	2738	+
960	CD44	CD44 molecule (Indian blood group)	NM_000610	4291	4479	+
3588	IL10RB	interleukin 10 receptor, beta	NM_000628	1091	1350	+
3588	IL10RB	interleukin 10 receptor, beta	NM_000628	1555	1885	+
3454	IFNAR1	interferon (alpha, beta and omega) receptor 1	NM_000629	1701	2010	+
3454	IFNAR1	interferon (alpha, beta and omega) receptor 1	NM_000629	2161	2380	+
3454	IFNAR1	interferon (alpha, beta and omega) receptor 1	NM_000629	4131	4420	+
596	BCL2	B-cell CLL/lymphoma 2	NM_000633	401	570	+
596	BCL2	B-cell CLL/lymphoma 2	NM_000633	811	980	+
596	BCL2	B-cell CLL/lymphoma 2	NM_000633	1533	1680	+
596	BCL2	B-cell CLL/lymphoma 2	NM_000633	1731	2320	+
596	BCL2	B-cell CLL/lymphoma 2	NM_000633	2371	2850	+
596	BCL2	B-cell CLL/lymphoma 2	NM_000633	5831	6020	+
2936	GSR	glutathione reductase	NM_000637	1451	1752	+
6402	SELL	selectin L	NM_000655	311	636	+
6402	SELL	selectin L	NM_000655	1541	1760	+
7040	TGFB1	transforming growth factor, beta 1	NM_000660	191	670	+
7040	TGFB1	transforming growth factor, beta 1	NM_000660	861	1030	+
95	ACY1	aminoacylase 1	NM_000666	1431	1665	+
128	ADH5	alcohol dehydrogenase 5 (class III), chi polypeptide	NM_000671	71	210	+
211	ALAS1	5'-aminolevulinate synthase 1	NM_000688	341	580	+
211	ALAS1	5'-aminolevulinate synthase 1	NM_000688	1921	2150	+
240	ALOX5	arachidonate 5-lipoxygenase	NM_000698	871	1070	+
240	ALOX5	arachidonate 5-lipoxygenase	NM_000698	2091	2438	+
301	ANXA1	annexin A1	NM_000700	491	610	+
593	BCKDHA	branched chain keto acid dehydrogenase E1, alpha polypeptide	NM_000709	1331	1470	+
593	BCKDHA	branched chain keto acid dehydrogenase E1, alpha polypeptide	NM_000709	1561	1748	+
645	BLVRB	biliverdin reductase B	NM_000713	61	200	+
645	BLVRB	biliverdin reductase B	NM_000713	681	849	+
776	CACNA1D	calcium channel, voltage-dependent, L type, alpha 1D subunit	NM_000720	6465	6767	+
782	CACNB1	calcium channel, voltage-dependent, beta 1 subunit	NM_000723	1571	1970	+
1140	CHRNB1	cholinergic receptor, nicotinic, beta 1 (muscle)	NM_000747	1491	1870	+
1312	COMT	catechol-O-methyltransferase	NM_000754	91	260	+
1312	COMT	catechol-O-methyltransferase	NM_000754	1061	1277	+
1435	CSF1	colony stimulating factor 1 (macrophage)	NM_000757	1271	1650	+
1435	CSF1	colony stimulating factor 1 (macrophage)	NM_000757	2191	2360	+
1435	CSF1	colony stimulating factor 1 (macrophage)	NM_000757	2371	2760	+
1435	CSF1	colony stimulating factor 1 (macrophage)	NM_000757	2811	3120	+
1595	CYP51A1	cytochrome P450, family 51, subfamily A, polypeptide 1	NM_000786	641	750	+
1633	DCK	deoxycytidine kinase	NM_000788	168	350	+
1633	DCK	deoxycytidine kinase	NM_000788	421	630	+
1719	DHFR	dihydrofolate reductase	NM_000791	2391	2550	+
1719	DHFR	dihydrofolate reductase	NM_000791	3091	3390	+
1719	DHFR	dihydrofolate reductase	NM_000791	3501	3770	+
2280	FKBP1A	FK506 binding protein 1A, 12kDa	NM_000801	98	300	+
2280	FKBP1A	FK506 binding protein 1A, 12kDa	NM_000801	1121	1260	+
2557	GABRA4	gamma-aminobutyric acid (GABA) A receptor, alpha 4	NM_000809	1931	2628	+
2557	GABRA4	gamma-aminobutyric acid (GABA) A receptor, alpha 4	NM_000809	6901	7080	+
2907	GRINA	glutamate receptor, ionotropic, N-methyl D-aspartate-associated protein 1 (glutamate binding)	NM_000837	291	450	+
2907	GRINA	glutamate receptor, ionotropic, N-methyl D-aspartate-associated protein 1 (glutamate binding)	NM_000837	1451	1690	+
2948	GSTM4	glutathione S-transferase mu 4	NM_000850	1041	1300	+
2982	GUCY1A3	guanylate cyclase 1, soluble, alpha 3	NM_000856	1331	1650	+
2982	GUCY1A3	guanylate cyclase 1, soluble, alpha 3	NM_000856	1681	1940	+
2982	GUCY1A3	guanylate cyclase 1, soluble, alpha 3	NM_000856	3451	3590	+
3156	HMGCR	3-hydroxy-3-methylglutaryl-CoA reductase	NM_000859	2701	2951	+
3482	IGF2R	insulin-like growth factor 2 receptor	NM_000876	6051	6260	+
3482	IGF2R	insulin-like growth factor 2 receptor	NM_000876	7121	7790	+
3482	IGF2R	insulin-like growth factor 2 receptor	NM_000876	8631	8870	+
3554	IL1R1	interleukin 1 receptor, type I	NM_000877	1761	1940	+
3554	IL1R1	interleukin 1 receptor, type I	NM_000877	4551	4710	+
3560	IL2RB	interleukin 2 receptor, beta	NM_000878	2061	2300	+
3574	IL7	interleukin 7	NM_000880	1111	1350	+
3615	IMPDH2	IMP (inosine 5'-monophosphate) dehydrogenase 2	NM_000884	581	850	+
3676	ITGA4	integrin, alpha 4 (antigen CD49D, alpha 4 subunit of VLA-4 receptor)	NM_000885	736	952	+
3676	ITGA4	integrin, alpha 4 (antigen CD49D, alpha 4 subunit of VLA-4 receptor)	NM_000885	1191	1300	+
3676	ITGA4	integrin, alpha 4 (antigen CD49D, alpha 4 subunit of VLA-4 receptor)	NM_000885	1501	1610	+
3676	ITGA4	integrin, alpha 4 (antigen CD49D, alpha 4 subunit of VLA-4 receptor)	NM_000885	3011	3180	+
3676	ITGA4	integrin, alpha 4 (antigen CD49D, alpha 4 subunit of VLA-4 receptor)	NM_000885	3731	4170	+
3687	ITGAX	integrin, alpha X (complement component 3 receptor 4 subunit)	NM_000887	3521	3917	+
3687	ITGAX	integrin, alpha X (complement component 3 receptor 4 subunit)	NM_000887	4071	4330	+
3695	ITGB7	integrin, beta 7	NM_000889	41	210	+
3695	ITGB7	integrin, beta 7	NM_000889	381	560	+
3695	ITGB7	integrin, beta 7	NM_000889	2551	2859	+
4881	NPR1	natriuretic peptide receptor 1	NM_000906	3671	3850	+
5034	P4HB	prolyl 4-hydroxylase, beta polypeptide	NM_000918	1601	1880	+
5034	P4HB	prolyl 4-hydroxylase, beta polypeptide	NM_000918	2111	2280	+
5034	P4HB	prolyl 4-hydroxylase, beta polypeptide	NM_000918	2461	2570	+
5066	PAM	peptidylglycine alpha-amidating monooxygenase	NM_000919	1541	1880	+
5066	PAM	peptidylglycine alpha-amidating monooxygenase	NM_000919	3051	3300	+
5143	PDE4C	phosphodiesterase 4C, cAMP-specific	NM_000923	2141	2330	+
5162	PDHB	pyruvate dehydrogenase (lipoamide) beta	NM_000925	181	310	+
5430	POLR2A	polymerase (RNA) II (DNA directed) polypeptide A, 220kDa	NM_000937	451	637	+
5430	POLR2A	polymerase (RNA) II (DNA directed) polypeptide A, 220kDa	NM_000937	941	1080	+
5430	POLR2A	polymerase (RNA) II (DNA directed) polypeptide A, 220kDa	NM_000937	4211	4440	+
5430	POLR2A	polymerase (RNA) II (DNA directed) polypeptide A, 220kDa	NM_000937	5101	6313	+
5431	POLR2B	polymerase (RNA) II (DNA directed) polypeptide B, 140kDa	NM_000938	771	890	+
5431	POLR2B	polymerase (RNA) II (DNA directed) polypeptide B, 140kDa	NM_000938	1871	2110	+
5431	POLR2B	polymerase (RNA) II (DNA directed) polypeptide B, 140kDa	NM_000938	2601	2830	+
5447	POR	P450 (cytochrome) oxidoreductase	NM_000941	71	180	+
5447	POR	P450 (cytochrome) oxidoreductase	NM_000941	2061	2360	+
5534	PPP3R1	protein phosphatase 3, regulatory subunit B, alpha	NM_000945	1	500	+
5534	PPP3R1	protein phosphatase 3, regulatory subunit B, alpha	NM_000945	918	1167	+
6122	RPL3	ribosomal protein L3	NM_000967	1221	1330	+
6124	RPL4	ribosomal protein L4	NM_000968	891	1396	+
6125	RPL5	ribosomal protein L5	NM_000969	681	1023	+
6129	RPL7	ribosomal protein L7	NM_000971	57	320	+
6135	RPL11	ribosomal protein L11	NM_000975	521	622	+
6141	RPL18	ribosomal protein L18	NM_000979	701	880	+
6142	RPL18A	ribosomal protein L18a	NM_000980	451	654	+
6144	RPL21	ribosomal protein L21	NM_000982	431	560	+
6139	RPL17	ribosomal protein L17	NM_000985	776	957	+
6154	RPL26	ribosomal protein L26	NM_000987	411	545	+
6157	RPL27A	ribosomal protein L27a	NM_000990	751	850	+
6159	RPL29	ribosomal protein L29	NM_000992	511	690	+
6167	RPL37	ribosomal protein L37	NM_000997	331	430	+
490	ATP2B1	ATPase, Ca++ transporting, plasma membrane 1	NM_001001323	146	397	+
490	ATP2B1	ATPase, Ca++ transporting, plasma membrane 1	NM_001001323	621	790	+
490	ATP2B1	ATPase, Ca++ transporting, plasma membrane 1	NM_001001323	995	1293	+
490	ATP2B1	ATPase, Ca++ transporting, plasma membrane 1	NM_001001323	2061	2220	+
490	ATP2B1	ATPase, Ca++ transporting, plasma membrane 1	NM_001001323	2291	2490	+
490	ATP2B1	ATPase, Ca++ transporting, plasma membrane 1	NM_001001323	3371	3535	+
490	ATP2B1	ATPase, Ca++ transporting, plasma membrane 1	NM_001001323	3745	4367	+
221035	REEP3	receptor accessory protein 3	NM_001001330	51	170	+
221035	REEP3	receptor accessory protein 3	NM_001001330	606	1008	+
115939	TSR3	TSR3, 20S rRNA accumulation, homolog (S. cerevisiae)	NM_001001410	877	1082	+
115939	TSR3	TSR3, 20S rRNA accumulation, homolog (S. cerevisiae)	NM_001001410	1083	1189	+
4090	SMAD5	SMAD family member 5	NM_001001419	421	738	+
4090	SMAD5	SMAD family member 5	NM_001001419	841	1130	+
4090	SMAD5	SMAD family member 5	NM_001001419	3291	3560	+
8675	STX16	syntaxin 16	NM_001001433	41	260	+
8675	STX16	syntaxin 16	NM_001001433	1021	1150	+
8675	STX16	syntaxin 16	NM_001001433	1751	2032	+
8675	STX16	syntaxin 16	NM_001001433	2611	2890	+
388272	C16orf87	chromosome 16 open reading frame 87	NM_001001436	473	620	+
9317	PTER	phosphotriesterase related	NM_001001484	301	710	+
92609	TIMM50	translocase of inner mitochondrial membrane 50 homolog (S. cerevisiae)	NM_001001563	1411	1604	+
112950	MED8	mediator complex subunit 8	NM_001001653	451	840	+
112950	MED8	mediator complex subunit 8	NM_001001653	971	1160	+
144363	LYRM5	LYR motif containing 5	NM_001001660	211	350	+
339745	SPOPL	speckle-type POZ protein-like	NM_001001664	1471	1768	+
414918	DENND6B	DENN/MADD domain containing 6B	NM_001001794	1901	2000	+
415116	PIM3	Pim-3 proto-oncogene, serine/threonine kinase	NM_001001852	1301	1690	+
861	RUNX1	runt-related transcription factor 1	NM_001001890	1011	1429	+
861	RUNX1	runt-related transcription factor 1	NM_001001890	2151	2290	+
509	ATP5C1	ATP synthase, H+ transporting, mitochondrial F1 complex, gamma polypeptide 1	NM_001001973	211	330	+
5394	EXOSC10	exosome component 10	NM_001001998	2221	2531	+
5394	EXOSC10	exosome component 10	NM_001001998	2661	2799	+
5211	PFKL	phosphofructokinase, liver	NM_001002021	2761	3010	+
5211	PFKL	phosphofructokinase, liver	NM_001002021	3211	3404	+
55862	ECHDC1	ethylmalonyl-CoA decarboxylase 1	NM_001002030	751	1040	+
517	ATP5G2	ATP synthase, H+ transporting, mitochondrial Fo complex, subunit C2 (subunit 9)	NM_001002031	581	710	+
517	ATP5G2	ATP synthase, H+ transporting, mitochondrial Fo complex, subunit C2 (subunit 9)	NM_001002031	1011	1141	+
51529	ANAPC11	anaphase promoting complex subunit 11	NM_001002244	741	898	+
94240	EPSTI1	epithelial stromal interaction 1 (breast)	NM_001002264	181	740	+
94240	EPSTI1	epithelial stromal interaction 1 (breast)	NM_001002264	790	1057	+
51125	GOLGA7	golgin A7	NM_001002296	146	330	+
51125	GOLGA7	golgin A7	NM_001002296	511	935	+
54788	DNAJB12	DnaJ (Hsp40) homolog, subfamily B, member 12	NM_001002762	2535	2711	+
10051	SMC4	structural maintenance of chromosomes 4	NM_001002800	1621	1920	+
10051	SMC4	structural maintenance of chromosomes 4	NM_001002800	2181	2310	+
10051	SMC4	structural maintenance of chromosomes 4	NM_001002800	2581	3008	+
10051	SMC4	structural maintenance of chromosomes 4	NM_001002800	3321	3430	+
80223	RAB11FIP1	RAB11 family interacting protein 1 (class I)	NM_001002814	1161	1340	+
80223	RAB11FIP1	RAB11 family interacting protein 1 (class I)	NM_001002814	3841	4071	+
80223	RAB11FIP1	RAB11 family interacting protein 1 (class I)	NM_001002814	6611	6870	+
126208	ZNF787	zinc finger protein 787	NM_001002836	1581	1690	+
55727	BTBD7	BTB (POZ) domain containing 7	NM_001002860	1101	1330	+
55727	BTBD7	BTB (POZ) domain containing 7	NM_001002860	2961	3280	+
55727	BTBD7	BTB (POZ) domain containing 7	NM_001002860	3351	3860	+
8563	THOC5	THO complex 5	NM_001002878	293	730	+
8563	THOC5	THO complex 5	NM_001002878	2379	2632	+
25776	CBY1	chibby homolog 1 (Drosophila)	NM_001002880	611	770	+
127943	FCRLB	Fc receptor-like B	NM_001002901	1351	1510	+
23131	GPATCH8	G patch domain containing 8	NM_001002909	971	1330	+
23131	GPATCH8	G patch domain containing 8	NM_001002909	3401	3600	+
23131	GPATCH8	G patch domain containing 8	NM_001002909	3701	3920	+
221830	TWISTNB	TWIST neighbor	NM_001002926	621	1020	+
3983	ABLIM1	actin binding LIM protein 1	NM_001003408	2521	2680	+
4087	SMAD2	SMAD family member 2	NM_001003652	416	657	+
4087	SMAD2	SMAD family member 2	NM_001003652	901	1080	+
4087	SMAD2	SMAD family member 2	NM_001003652	1631	1986	+
753	LDLRAD4	low density lipoprotein receptor class A domain containing 4	NM_001003674	1122	1300	+
753	LDLRAD4	low density lipoprotein receptor class A domain containing 4	NM_001003674	1571	2120	+
79096	C11orf49	chromosome 11 open reading frame 49	NM_001003676	1262	1983	+
10042	HMGXB4	HMG box domain containing 4	NM_001003681	521	1030	+
10042	HMGXB4	HMG box domain containing 4	NM_001003681	1081	1470	+
29796	UQCR10	ubiquinol-cytochrome c reductase, complex III subunit X	NM_001003684	284	505	+
6239	RREB1	ras responsive element binding protein 1	NM_001003699	2941	3220	+
6239	RREB1	ras responsive element binding protein 1	NM_001003699	4611	4850	+
6239	RREB1	ras responsive element binding protein 1	NM_001003699	5001	5150	+
6239	RREB1	ras responsive element binding protein 1	NM_001003699	5451	5980	+
2733	GLE1	GLE1 RNA export mediator	NM_001003722	431	720	+
2733	GLE1	GLE1 RNA export mediator	NM_001003722	1040	1302	+
23299	BICD2	bicaudal D homolog 2 (Drosophila)	NM_001003800	1175	1550	+
23299	BICD2	bicaudal D homolog 2 (Drosophila)	NM_001003800	6251	6410	+
445372	TRIM6-TRIM34	TRIM6-TRIM34 readthrough	NM_001003819	1841	1990	+
29780	PARVB	parvin, beta	NM_001003828	320	490	+
29780	PARVB	parvin, beta	NM_001003828	1381	1569	+
2123	EVI2A	ecotropic viral integration site 2A	NM_001003927	481	620	+
2123	EVI2A	ecotropic viral integration site 2A	NM_001003927	931	1160	+
90427	BMF	Bcl2 modifying factor	NM_001003940	1051	1210	+
90427	BMF	Bcl2 modifying factor	NM_001003940	1331	1610	+
90427	BMF	Bcl2 modifying factor	NM_001003940	2081	2340	+
90427	BMF	Bcl2 modifying factor	NM_001003940	2925	3110	+
408050	NOMO3	NODAL modulator 3	NM_001004067	2201	2430	+
408050	NOMO3	NODAL modulator 3	NM_001004067	3381	3520	+
408050	NOMO3	NODAL modulator 3	NM_001004067	3674	4022	+
4345	CD200	CD200 molecule	NM_001004196	411	580	+
283337	ZNF740	zinc finger protein 740	NM_001004304	91	420	+
283337	ZNF740	zinc finger protein 740	NM_001004304	1021	1400	+
283337	ZNF740	zinc finger protein 740	NM_001004304	3471	3660	+
440400	RNASEK	ribonuclease, RNase K	NM_001004333	549	783	+
440590	ZYG11A	zyg-11 family member A, cell cycle regulator	NM_001004339	2911	3010	+
29121	CLEC2D	C-type lectin domain family 2, member D	NM_001004419	1211	1360	+
29121	CLEC2D	C-type lectin domain family 2, member D	NM_001004419	1691	1829	+
29121	CLEC2D	C-type lectin domain family 2, member D	NM_001004419	1830	1941	+
1107	CHD3	chromodomain helicase DNA binding protein 3	NM_001005271	271	549	+
1107	CHD3	chromodomain helicase DNA binding protein 3	NM_001005271	861	1100	+
1107	CHD3	chromodomain helicase DNA binding protein 3	NM_001005271	5071	5240	+
1107	CHD3	chromodomain helicase DNA binding protein 3	NM_001005271	6191	6420	+
6720	SREBF1	sterol regulatory element binding transcription factor 1	NM_001005291	101	210	+
6720	SREBF1	sterol regulatory element binding transcription factor 1	NM_001005291	371	850	+
6720	SREBF1	sterol regulatory element binding transcription factor 1	NM_001005291	1641	1760	+
9500	MAGED1	melanoma antigen family D1	NM_001005333	1241	1440	+
9500	MAGED1	melanoma antigen family D1	NM_001005333	1481	1800	+
9500	MAGED1	melanoma antigen family D1	NM_001005333	2321	2480	+
6001	RGS10	regulator of G-protein signaling 10	NM_001005339	541	787	+
205	AK4	adenylate kinase 4	NM_001005353	891	1306	+
205	AK4	adenylate kinase 4	NM_001005353	1641	1900	+
205	AK4	adenylate kinase 4	NM_001005353	2051	2272	+
205	AK4	adenylate kinase 4	NM_001005353	2691	2820	+
205	AK4	adenylate kinase 4	NM_001005353	2921	3060	+
205	AK4	adenylate kinase 4	NM_001005353	4631	4840	+
1785	DNM2	dynamin 2	NM_001005360	1601	1750	+
1785	DNM2	dynamin 2	NM_001005360	2521	2750	+
4528	MTIF2	mitochondrial translational initiation factor 2	NM_001005369	961	1260	+
4528	MTIF2	mitochondrial translational initiation factor 2	NM_001005369	2031	2304	+
4528	MTIF2	mitochondrial translational initiation factor 2	NM_001005369	2841	2940	+
10097	ACTR2	ARP2 actin-related protein 2 homolog (yeast)	NM_001005386	141	377	+
10097	ACTR2	ARP2 actin-related protein 2 homolog (yeast)	NM_001005386	891	1030	+
10097	ACTR2	ARP2 actin-related protein 2 homolog (yeast)	NM_001005386	1216	1590	+
10097	ACTR2	ARP2 actin-related protein 2 homolog (yeast)	NM_001005386	3231	3430	+
2629	GBA	glucosidase, beta, acid	NM_001005741_2	1991	2230	+
2629	GBA	glucosidase, beta, acid	NM_001005741_2	2321	2540	+
8650	NUMB	numb homolog (Drosophila)	NM_001005743	2151	2390	+
785	CACNB4	calcium channel, voltage-dependent, beta 4 subunit	NM_001005747	1381	1801	+
785	CACNB4	calcium channel, voltage-dependent, beta 4 subunit	NM_001005747	4581	4757	+
387680	FAM21A	family with sequence similarity 21, member A	NM_001005751	3371	3630	+
163131	ZNF780B	zinc finger protein 780B	NM_001005851	1484	1710	+
163131	ZNF780B	zinc finger protein 780B	NM_001005851	2081	2190	+
6259	RYK	receptor-like tyrosine kinase	NM_001005861	1931	2110	+
339123	JMJD8	jumonji domain containing 8	NM_001005920	961	1280	+
56941	HMCES	5-hydroxymethylcytosine (hmC) binding, ES cell-specific	NM_001006109	161	260	+
56941	HMCES	5-hydroxymethylcytosine (hmC) binding, ES cell-specific	NM_001006109	1211	1500	+
79109	MAPKAP1	mitogen-activated protein kinase associated protein 1	NM_001006617	71	190	+
79109	MAPKAP1	mitogen-activated protein kinase associated protein 1	NM_001006617	531	710	+
55114	ARHGAP17	Rho GTPase activating protein 17	NM_001006634	2181	2470	+
55114	ARHGAP17	Rho GTPase activating protein 17	NM_001006634	2651	3020	+
55114	ARHGAP17	Rho GTPase activating protein 17	NM_001006634	3141	3370	+
1380	CR2	complement component (3d/Epstein Barr virus) receptor 2	NM_001006658	2511	2720	+
1380	CR2	complement component (3d/Epstein Barr virus) receptor 2	NM_001006658	3481	3750	+
85012	TCEAL3	transcription elongation factor A (SII)-like 3	NM_001006933	541	720	+
10195	ALG3	ALG3, alpha-1,3- mannosyltransferase	NM_001006941	1071	1210	+
6191	RPS4X	ribosomal protein S4, X-linked	NM_001007	797	948	+
9527	GOSR1	golgi SNAP receptor complex member 1	NM_001007024	681	963	+
9527	GOSR1	golgi SNAP receptor complex member 1	NM_001007024	1224	1410	+
9527	GOSR1	golgi SNAP receptor complex member 1	NM_001007024	1122	1223	+
9527	GOSR1	golgi SNAP receptor complex member 1	NM_001007024	2091	2390	+
79053	ALG8	ALG8, alpha-1,3-glucosyltransferase	NM_001007027	1231	1400	+
7587	ZNF37A	zinc finger protein 37A	NM_001007094	6391	6570	+
7587	ZNF37A	zinc finger protein 37A	NM_001007094	6591	6760	+
8405	SPOP	speckle-type POZ protein	NM_001007226	1584	2024	+
8405	SPOP	speckle-type POZ protein	NM_001007226	2025	2321	+
6760	SS18	synovial sarcoma translocation, chromosome 18	NM_001007559	1469	1747	+
126298	IRGQ	immunity-related GTPase family, Q	NM_001007561	321	560	+
126298	IRGQ	immunity-related GTPase family, Q	NM_001007561	1099	1490	+
126298	IRGQ	immunity-related GTPase family, Q	NM_001007561	7756	8030	+
10390	CEPT1	choline/ethanolamine phosphotransferase 1	NM_001007794	128	561	+
10133	OPTN	optineurin	NM_001008211	1473	1610	+
51114	ZDHHC9	zinc finger, DHHC-type containing 9	NM_001008222	1431	1650	+
8545	CGGBP1	CGG triplet repeat binding protein 1	NM_001008390	41	220	+
8545	CGGBP1	CGG triplet repeat binding protein 1	NM_001008390	481	1059	+
201725	C4orf46	chromosome 4 open reading frame 46	NM_001008393	441	670	+
388561	ZNF761	zinc finger protein 761	NM_001008401	2491	2650	+
4735	2015-09-02	septin 2	NM_001008491	1033	1300	+
4735	2015-09-02	septin 2	NM_001008491	1311	1715	+
4735	2015-09-02	septin 2	NM_001008491	3081	3225	+
4735	2015-09-02	septin 2	NM_001008491	3471	3630	+
169200	TMEM64	transmembrane protein 64	NM_001008495	981	1190	+
439921	MXRA7	matrix-remodelling associated 7	NM_001008528	261	450	+
5641	LGMN	legumain	NM_001008530	90	260	+
5641	LGMN	legumain	NM_001008530	1101	1380	+
7852	CXCR4	chemokine (C-X-C motif) receptor 4	NM_001008540	541	640	+
8459	TPST2	tyrosylprotein sulfotransferase 2	NM_001008566	1491	1600	+
56267	CCBL2	cysteine conjugate-beta lyase 2	NM_001008661	176	396	+
56267	CCBL2	cysteine conjugate-beta lyase 2	NM_001008661	2011	2142	+
24144	TFIP11	tuftelin interacting protein 11	NM_001008697	2531	2891	+
494143	CHAC2	ChaC, cation transport regulator homolog 2 (E. coli)	NM_001008708	481	640	+
5499	PPP1CA	protein phosphatase 1, catalytic subunit, alpha isozyme	NM_001008709	91	190	+
7675	ZNF121	zinc finger protein 121	NM_001008727	301	460	+
8576	STK16	serine/threonine kinase 16	NM_001008910	1305	1422	+
9793	CKAP5	cytoskeleton associated protein 5	NM_001008938	911	1110	+
9793	CKAP5	cytoskeleton associated protein 5	NM_001008938	1691	1907	+
9793	CKAP5	cytoskeleton associated protein 5	NM_001008938	3421	3520	+
9793	CKAP5	cytoskeleton associated protein 5	NM_001008938	6031	6308	+
6193	RPS5	ribosomal protein S5	NM_001009	641	740	+
5516	PPP2CB	protein phosphatase 2, catalytic subunit, beta isozyme	NM_001009552	21	190	+
5516	PPP2CB	protein phosphatase 2, catalytic subunit, beta isozyme	NM_001009552	421	600	+
22883	CLSTN1	calsyntenin 1	NM_001009566	1341	1500	+
22883	CLSTN1	calsyntenin 1	NM_001009566	3443	3766	+
22883	CLSTN1	calsyntenin 1	NM_001009566	3831	4140	+
22883	CLSTN1	calsyntenin 1	NM_001009566	4211	4540	+
23318	ZCCHC11	zinc finger, CCHC domain containing 11	NM_001009881	511	940	+
23318	ZCCHC11	zinc finger, CCHC domain containing 11	NM_001009881	1961	2060	+
23318	ZCCHC11	zinc finger, CCHC domain containing 11	NM_001009881	2381	2910	+
23318	ZCCHC11	zinc finger, CCHC domain containing 11	NM_001009881	4121	4260	+
146712	B3GNTL1	UDP-GlcNAc:betaGal beta-1,3-N-acetylglucosaminyltransferase-like 1	NM_001009905	1201	1373	+
23355	VPS8	vacuolar protein sorting 8 homolog (S. cerevisiae)	NM_001009921	3981	4090	+
23355	VPS8	vacuolar protein sorting 8 homolog (S. cerevisiae)	NM_001009921	4721	5009	+
29058	TMEM230	transmembrane protein 230	NM_001009924	781	940	+
29058	TMEM230	transmembrane protein 230	NM_001009924	1601	1748	+
5310	PKD1	polycystic kidney disease 1 (autosomal dominant)	NM_001009944	893	1210	+
5310	PKD1	polycystic kidney disease 1 (autosomal dominant)	NM_001009944	2881	3050	+
5310	PKD1	polycystic kidney disease 1 (autosomal dominant)	NM_001009944	3788	4300	+
5310	PKD1	polycystic kidney disease 1 (autosomal dominant)	NM_001009944	4391	4910	+
5310	PKD1	polycystic kidney disease 1 (autosomal dominant)	NM_001009944	5141	5510	+
5310	PKD1	polycystic kidney disease 1 (autosomal dominant)	NM_001009944	6041	6230	+
5310	PKD1	polycystic kidney disease 1 (autosomal dominant)	NM_001009944	6371	6960	+
5310	PKD1	polycystic kidney disease 1 (autosomal dominant)	NM_001009944	12971	13230	+
130074	FAM168B	family with sequence similarity 168, member B	NM_001009993	391	650	+
130074	FAM168B	family with sequence similarity 168, member B	NM_001009993	801	1110	+
130074	FAM168B	family with sequence similarity 168, member B	NM_001009993	2211	2330	+
130074	FAM168B	family with sequence similarity 168, member B	NM_001009993	4811	4980	+
23028	KDM1A	lysine (K)-specific demethylase 1A	NM_001009999	231	330	+
23028	KDM1A	lysine (K)-specific demethylase 1A	NM_001009999	371	710	+
23028	KDM1A	lysine (K)-specific demethylase 1A	NM_001009999	1591	1798	+
23028	KDM1A	lysine (K)-specific demethylase 1A	NM_001009999	2905	3058	+
6194	RPS6	ribosomal protein S6	NM_001010	551	770	+
135293	PM20D2	peptidase M20 domain containing 2	NM_001010853	1251	1478	+
149603	RNF187	ring finger protein 187	NM_001010858	1251	1350	+
284611	FAM102B	family with sequence similarity 102, member B	NM_001010883	1181	1400	+
441168	FAM26F	family with sequence similarity 26, member F	NM_001010919	771	970	+
5906	RAP1A	RAP1A, member of RAS oncogene family	NM_001010935	251	350	+
5906	RAP1A	RAP1A, member of RAS oncogene family	NM_001010935	551	930	+
55830	GLT8D1	glycosyltransferase 8 domain containing 1	NM_001010983	1806	2344	+
6201	RPS7	ribosomal protein S7	NM_001011	601	720	+
11034	DSTN	destrin (actin depolymerizing factor)	NM_001011546	365	540	+
11034	DSTN	destrin (actin depolymerizing factor)	NM_001011546	661	820	+
79145	CHCHD7	coiled-coil-helix-coiled-coil-helix domain containing 7	NM_001011667	716	1000	+
122830	NAA30	N(alpha)-acetyltransferase 30, NatC catalytic subunit	NM_001011713	541	890	+
339287	MSL1	male-specific lethal 1 homolog (Drosophila)	NM_001012241	75	895	+
339287	MSL1	male-specific lethal 1 homolog (Drosophila)	NM_001012241	2621	2794	+
338440	ANO9	anoctamin 9	NM_001012302	2391	2864	+
64400	AKTIP	AKT interacting protein	NM_001012398	1181	1280	+
116113	FOXP4	forkhead box P4	NM_001012426	2331	2750	+
1487	CTBP1	C-terminal binding protein 1	NM_001012614	1291	1490	+
1487	CTBP1	C-terminal binding protein 1	NM_001012614	1636	1940	+
9235	IL32	interleukin 32	NM_001012631	831	1023	+
6520	SLC3A2	solute carrier family 3 (amino acid transporter heavy chain), member 2	NM_001012662	518	782	+
6520	SLC3A2	solute carrier family 3 (amino acid transporter heavy chain), member 2	NM_001012662	1870	2305	+
1635	DCTD	dCMP deaminase	NM_001012732	851	1300	+
387921	NHLRC3	NHL repeat containing 3	NM_001012754	1231	1370	+
387921	NHLRC3	NHL repeat containing 3	NM_001012754	1591	2090	+
91351	DDX60L	DEAD (Asp-Glu-Ala-Asp) box polypeptide 60-like	NM_001012967	3731	3860	+
91351	DDX60L	DEAD (Asp-Glu-Ala-Asp) box polypeptide 60-like	NM_001012967	5760	6210	+
139886	SPIN4	spindlin family, member 4	NM_001012968	23	430	+
139886	SPIN4	spindlin family, member 4	NM_001012968	596	1197	+
144245	ALG10B	ALG10B, alpha-1,2-glucosyltransferase	NM_001013620	681	860	+
388969	C2orf68	chromosome 2 open reading frame 68	NM_001013649	18	160	+
388969	C2orf68	chromosome 2 open reading frame 68	NM_001013649	651	940	+
388969	C2orf68	chromosome 2 open reading frame 68	NM_001013649	1351	1530	+
388969	C2orf68	chromosome 2 open reading frame 68	NM_001013649	2741	2860	+
391059	FRRS1	ferric-chelate reductase 1	NM_001013660	2314	2574	+
402055	SRRD	SRR1 domain containing	NM_001013694	961	1254	+
440275	EIF2AK4	eukaryotic translation initiation factor 2 alpha kinase 4	NM_001013703	611	710	+
440275	EIF2AK4	eukaryotic translation initiation factor 2 alpha kinase 4	NM_001013703	2021	2325	+
146206	RLTPR	RGD motif, leucine rich repeats, tropomodulin domain and proline-rich containing	NM_001013838	3511	3891	+
146206	RLTPR	RGD motif, leucine rich repeats, tropomodulin domain and proline-rich containing	NM_001013838	4191	4449	+
55208	DCUN1D2	DCN1, defective in cullin neddylation 1, domain containing 2	NM_001014283	2191	2755	+
27005	USP21	ubiquitin specific peptidase 21	NM_001014443	441	780	+
132299	OCIAD2	OCIA domain containing 2	NM_001014446	61	290	+
83460	EMC6	ER membrane protein complex subunit 6	NM_001014764	601	790	+
93611	FBXO44	F-box protein 44	NM_001014765	2131	2277	+
3611	ILK	integrin-linked kinase	NM_001014795	1741	2056	+
9529	BAG5	BCL2-associated athanogene 5	NM_001015049	515	970	+
9529	BAG5	BCL2-associated athanogene 5	NM_001015049	1131	1630	+
9529	BAG5	BCL2-associated athanogene 5	NM_001015049	1651	1860	+
10014	HDAC5	histone deacetylase 5	NM_001015053	691	900	+
10014	HDAC5	histone deacetylase 5	NM_001015053	1321	1510	+
10014	HDAC5	histone deacetylase 5	NM_001015053	1921	2214	+
548645	DNAJC25	DnaJ (Hsp40) homolog, subfamily C , member 25	NM_001015882	571	761	+
548645	DNAJC25	DnaJ (Hsp40) homolog, subfamily C , member 25	NM_001015882	1051	1165	+
8480	RAE1	ribonucleic acid export 1	NM_001015885	1441	1690	+
6206	RPS12	ribosomal protein S12	NM_001016	288	461	+
117584	RFFL	ring finger and FYVE-like domain containing E3 ubiquitin protein ligase	NM_001017368	347	800	+
117584	RFFL	ring finger and FYVE-like domain containing E3 ubiquitin protein ligase	NM_001017368	1001	1280	+
117584	RFFL	ring finger and FYVE-like domain containing E3 ubiquitin protein ligase	NM_001017368	2911	3060	+
117584	RFFL	ring finger and FYVE-like domain containing E3 ubiquitin protein ligase	NM_001017368	3421	3540	+
445329	SULT1A4	sulfotransferase family, cytosolic, 1A, phenol-preferring, member 4	NM_001017390	841	1070	+
10147	SUGP2	SURP and G patch domain containing 2	NM_001017392	1111	1290	+
10147	SUGP2	SURP and G patch domain containing 2	NM_001017392	1521	1670	+
10147	SUGP2	SURP and G patch domain containing 2	NM_001017392	2251	2520	+
10147	SUGP2	SURP and G patch domain containing 2	NM_001017392	4381	4550	+
157570	ESCO2	establishment of sister chromatid cohesion N-acetyltransferase 2	NM_001017420	181	330	+
157570	ESCO2	establishment of sister chromatid cohesion N-acetyltransferase 2	NM_001017420	701	930	+
3635	INPP5D	inositol polyphosphate-5-phosphatase, 145kDa	NM_001017915	3311	3480	+
3635	INPP5D	inositol polyphosphate-5-phosphatase, 145kDa	NM_001017915	3651	4040	+
3635	INPP5D	inositol polyphosphate-5-phosphatase, 145kDa	NM_001017915	4198	4644	+
3320	HSP90AA1	heat shock protein 90kDa alpha (cytosolic), class A member 1	NM_001017963	671	820	+
3320	HSP90AA1	heat shock protein 90kDa alpha (cytosolic), class A member 1	NM_001017963	891	1020	+
3320	HSP90AA1	heat shock protein 90kDa alpha (cytosolic), class A member 1	NM_001017963	1211	1675	+
3320	HSP90AA1	heat shock protein 90kDa alpha (cytosolic), class A member 1	NM_001017963	2361	2691	+
3320	HSP90AA1	heat shock protein 90kDa alpha (cytosolic), class A member 1	NM_001017963	3471	3570	+
150223	YDJC	YdjC homolog (bacterial)	NM_001017964	871	1323	+
92270	ATP6AP1L	ATPase, H+ transporting, lysosomal accessory protein 1-like	NM_001017971	1811	2080	+
92270	ATP6AP1L	ATPase, H+ transporting, lysosomal accessory protein 1-like	NM_001017971	2171	2310	+
203547	VMA21	VMA21 vacuolar H+-ATPase homolog (S. cerevisiae)	NM_001017980	351	528	+
203547	VMA21	VMA21 vacuolar H+-ATPase homolog (S. cerevisiae)	NM_001017980	3311	3430	+
2790	GNG10	guanine nucleotide binding protein (G protein), gamma 10	NM_001017998	50	220	+
6209	RPS15	ribosomal protein S15	NM_001018	381	530	+
171568	POLR3H	polymerase (RNA) III (DNA directed) polypeptide H (22.9kD)	NM_001018050	1011	1443	+
26135	SERBP1	SERPINE1 mRNA binding protein 1	NM_001018067	211	650	+
26135	SERBP1	SERPINE1 mRNA binding protein 1	NM_001018067	856	1137	+
26135	SERBP1	SERPINE1 mRNA binding protein 1	NM_001018067	1138	1537	+
57175	CORO1B	coronin, actin binding protein, 1B	NM_001018070	1731	1905	+
2908	NR3C1	nuclear receptor subfamily 3, group C, member 1 (glucocorticoid receptor)	NM_001018077	962	1430	+
2908	NR3C1	nuclear receptor subfamily 3, group C, member 1 (glucocorticoid receptor)	NM_001018077	1441	2072	+
2908	NR3C1	nuclear receptor subfamily 3, group C, member 1 (glucocorticoid receptor)	NM_001018077	3211	3367	+
2356	FPGS	folylpolyglutamate synthase	NM_001018078	101	220	+
2356	FPGS	folylpolyglutamate synthase	NM_001018078	1781	1930	+
2356	FPGS	folylpolyglutamate synthase	NM_001018078	2191	2292	+
54832	VPS13C	vacuolar protein sorting 13 homolog C (S. cerevisiae)	NM_001018088	8157	8360	+
54832	VPS13C	vacuolar protein sorting 13 homolog C (S. cerevisiae)	NM_001018088	10511	10790	+
8883	NAE1	NEDD8 activating enzyme E1 subunit 1	NM_001018159	31	150	+
8883	NAE1	NEDD8 activating enzyme E1 subunit 1	NM_001018159	831	1076	+
6210	RPS15A	ribosomal protein S15a	NM_001019	411	531	+
6217	RPS16	ribosomal protein S16	NM_001020	401	571	+
9698	PUM1	pumilio RNA-binding family member 1	NM_001020658	23	630	+
9698	PUM1	pumilio RNA-binding family member 1	NM_001020658	763	1003	+
9698	PUM1	pumilio RNA-binding family member 1	NM_001020658	2241	2480	+
9698	PUM1	pumilio RNA-binding family member 1	NM_001020658	3691	3830	+
9698	PUM1	pumilio RNA-binding family member 1	NM_001020658	4031	4195	+
6218	RPS17	ribosomal protein S17	NM_001021_2	181	364	+
6223	RPS19	ribosomal protein S19	NM_001022	651	839	+
440270	GOLGA8B	golgin A8 family, member B	NM_001023567	22	600	+
440270	GOLGA8B	golgin A8 family, member B	NM_001023567	731	1454	+
440270	GOLGA8B	golgin A8 family, member B	NM_001023567	2401	2530	+
9657	IQCB1	IQ motif containing B1	NM_001023570	85	300	+
9657	IQCB1	IQ motif containing B1	NM_001023570	1122	1550	+
9657	IQCB1	IQ motif containing B1	NM_001023570	1661	1940	+
6227	RPS21	ribosomal protein S21	NM_001024	261	390	+
375	ARF1	ADP-ribosylation factor 1	NM_001024227	641	880	+
118490	MSS51	MSS51 mitochondrial translational activator	NM_001024593	781	950	+
6128	RPL6	ribosomal protein L6	NM_001024662	851	1020	+
91750	LIN52	lin-52 DREAM MuvB core complex component	NM_001024674	401	600	+
91750	LIN52	lin-52 DREAM MuvB core complex component	NM_001024674	781	880	+
5914	RARA	retinoic acid receptor, alpha	NM_001024809	1965	2500	+
6133	RPL9	ribosomal protein L9	NM_001024921	711	827	+
55763	EXOC1	exocyst complex component 1	NM_001024924	2906	3093	+
81555	YIPF5	Yip1 domain family, member 5	NM_001024947	1158	1358	+
81555	YIPF5	Yip1 domain family, member 5	NM_001024947	1851	1950	+
6309	SC5D	sterol-C5-desaturase	NM_001024956	924	1152	+
6309	SC5D	sterol-C5-desaturase	NM_001024956	1211	1447	+
6309	SC5D	sterol-C5-desaturase	NM_001024956	2151	2250	+
6309	SC5D	sterol-C5-desaturase	NM_001024956	3721	3900	+
10659	CELF2	CUGBP, Elav-like family member 2	NM_001025077	124	290	+
10659	CELF2	CUGBP, Elav-like family member 2	NM_001025077	1601	1865	+
10659	CELF2	CUGBP, Elav-like family member 2	NM_001025077	5551	5960	+
10659	CELF2	CUGBP, Elav-like family member 2	NM_001025077	7591	8020	+
23	ABCF1	ATP-binding cassette, sub-family F (GCN20), member 1	NM_001025091_2	84	200	+
23	ABCF1	ATP-binding cassette, sub-family F (GCN20), member 1	NM_001025091_2	731	900	+
23	ABCF1	ATP-binding cassette, sub-family F (GCN20), member 1	NM_001025091_2	2951	3291	+
4155	MBP	myelin basic protein	NM_001025100	51	360	+
4155	MBP	myelin basic protein	NM_001025100	461	1406	+
1452	CSNK1A1	casein kinase 1, alpha 1	NM_001025105	211	510	+
1452	CSNK1A1	casein kinase 1, alpha 1	NM_001025105	1771	1940	+
1452	CSNK1A1	casein kinase 1, alpha 1	NM_001025105	2201	2370	+
1854	DUT	deoxyuridine triphosphatase	NM_001025248	241	340	+
272	AMPD3	adenosine monophosphate deaminase 3	NM_001025390	591	800	+
272	AMPD3	adenosine monophosphate deaminase 3	NM_001025390	1121	1230	+
272	AMPD3	adenosine monophosphate deaminase 3	NM_001025390	2561	3000	+
81565	NDEL1	nudE neurodevelopment protein 1-like 1	NM_001025579	291	540	+
81565	NDEL1	nudE neurodevelopment protein 1-like 1	NM_001025579	1311	1493	+
257106	ARHGAP30	Rho GTPase activating protein 30	NM_001025598	1821	2010	+
257106	ARHGAP30	Rho GTPase activating protein 30	NM_001025598	2341	2900	+
83478	ARHGAP24	Rho GTPase activating protein 24	NM_001025616	1521	1700	+
83478	ARHGAP24	Rho GTPase activating protein 24	NM_001025616	2071	2878	+
51104	ABHD17B	abhydrolase domain containing 17B	NM_001025780	701	920	+
51104	ABHD17B	abhydrolase domain containing 17B	NM_001025780	1271	1499	+
26140	TTLL3	tubulin tyrosine ligase-like family member 3	NM_001025930	2221	2706	+
26140	TTLL3	tubulin tyrosine ligase-like family member 3	NM_001025930	2892	3120	+
26140	TTLL3	tubulin tyrosine ligase-like family member 3	NM_001025930	3191	3400	+
6231	RPS26	ribosomal protein S26	NM_001029	494	667	+
387263	C6orf120	chromosome 6 open reading frame 120	NM_001029863	111	360	+
387263	C6orf120	chromosome 6 open reading frame 120	NM_001029863	724	1158	+
387263	C6orf120	chromosome 6 open reading frame 120	NM_001029863	1191	1460	+
57713	SFMBT2	Scm-like with four mbt domains 2	NM_001029880	2815	3070	+
57713	SFMBT2	Scm-like with four mbt domains 2	NM_001029880	3151	3310	+
57713	SFMBT2	Scm-like with four mbt domains 2	NM_001029880	4171	4390	+
57713	SFMBT2	Scm-like with four mbt domains 2	NM_001029880	4661	4830	+
57713	SFMBT2	Scm-like with four mbt domains 2	NM_001029880	6041	6530	+
64745	METTL17	methyltransferase like 17	NM_001029991	501	660	+
64745	METTL17	methyltransferase like 17	NM_001029991	1261	1410	+
64745	METTL17	methyltransferase like 17	NM_001029991	1681	1780	+
6232	RPS27	ribosomal protein S27	NM_001030	251	350	+
163	AP2B1	adaptor-related protein complex 2, beta 1 subunit	NM_001030006	66	400	+
163	AP2B1	adaptor-related protein complex 2, beta 1 subunit	NM_001030006	2491	2620	+
163	AP2B1	adaptor-related protein complex 2, beta 1 subunit	NM_001030006	2911	3240	+
163	AP2B1	adaptor-related protein complex 2, beta 1 subunit	NM_001030006	4826	5450	+
164	AP1G1	adaptor-related protein complex 1, gamma 1 subunit	NM_001030007	2071	2240	+
164	AP1G1	adaptor-related protein complex 1, gamma 1 subunit	NM_001030007	2711	3318	+
164	AP1G1	adaptor-related protein complex 1, gamma 1 subunit	NM_001030007	6081	6260	+
164	AP1G1	adaptor-related protein complex 1, gamma 1 subunit	NM_001030007	6741	6840	+
6693	SPN	sialophorin	NM_001030288	226	1146	+
6693	SPN	sialophorin	NM_001030288	112	225	+
6693	SPN	sialophorin	NM_001030288	1821	2040	+
6693	SPN	sialophorin	NM_001030288	2219	2390	+
6693	SPN	sialophorin	NM_001030288	3281	3455	+
90639	COX19	COX19 cytochrome c oxidase assembly factor	NM_001031617	1911	2120	+
90639	COX19	COX19 cytochrome c oxidase assembly factor	NM_001031617	2171	2380	+
90639	COX19	COX19 cytochrome c oxidase assembly factor	NM_001031617	2441	2620	+
90639	COX19	COX19 cytochrome c oxidase assembly factor	NM_001031617	2921	3100	+
53917	RAB24	RAB24, member RAS oncogene family	NM_001031677	181	300	+
53917	RAB24	RAB24, member RAS oncogene family	NM_001031677	1181	1347	+
864	RUNX3	runt-related transcription factor 3	NM_001031680	1351	1890	+
864	RUNX3	runt-related transcription factor 3	NM_001031680	1961	2440	+
6432	SRSF7	serine/arginine-rich splicing factor 7	NM_001031684	111	210	+
9373	PLAA	phospholipase A2-activating protein	NM_001031689	2326	2620	+
54859	ELP6	elongator acetyltransferase complex subunit 6	NM_001031703	871	1170	+
57222	ERGIC1	endoplasmic reticulum-golgi intermediate compartment (ERGIC) 1	NM_001031711	1561	1770	+
60487	TRMT11	tRNA methyltransferase 11 homolog (S. cerevisiae)	NM_001031712	1421	1610	+
63933	MCUR1	mitochondrial calcium uniporter regulator 1	NM_001031713	871	1050	+
64859	NABP1	nucleic acid binding protein 1	NM_001031716	7	170	+
64859	NABP1	nucleic acid binding protein 1	NM_001031716	331	500	+
64859	NABP1	nucleic acid binding protein 1	NM_001031716	871	1141	+
64859	NABP1	nucleic acid binding protein 1	NM_001031716	3711	3840	+
79982	DNAJB14	DnaJ (Hsp40) homolog, subfamily B, member 14	NM_001031723	118	730	+
79982	DNAJB14	DnaJ (Hsp40) homolog, subfamily B, member 14	NM_001031723	781	910	+
79982	DNAJB14	DnaJ (Hsp40) homolog, subfamily B, member 14	NM_001031723	1008	1328	+
79982	DNAJB14	DnaJ (Hsp40) homolog, subfamily B, member 14	NM_001031723	1329	1464	+
79982	DNAJB14	DnaJ (Hsp40) homolog, subfamily B, member 14	NM_001031723	2131	2510	+
84245	MRI1	methylthioribose-1-phosphate isomerase 1	NM_001031727	1071	1180	+
91746	YTHDC1	YTH domain containing 1	NM_001031732	88	290	+
91746	YTHDC1	YTH domain containing 1	NM_001031732	831	1041	+
91746	YTHDC1	YTH domain containing 1	NM_001031732	2361	2542	+
1456	CSNK1G3	casein kinase 1, gamma 3	NM_001031812	473	900	+
1456	CSNK1G3	casein kinase 1, gamma 3	NM_001031812	1281	1440	+
552900	BOLA2	bolA family member 2	NM_001031827	891	1010	+
5257	PHKB	phosphorylase kinase, beta	NM_001031835	3187	3669	+
5257	PHKB	phosphorylase kinase, beta	NM_001031835	4351	4460	+
5257	PHKB	phosphorylase kinase, beta	NM_001031835	4981	5276	+
7071	KLF10	Kruppel-like factor 10	NM_001032282	851	1270	+
7071	KLF10	Kruppel-like factor 10	NM_001032282	1551	2032	+
7112	TMPO	thymopoietin	NM_001032283	301	690	+
7112	TMPO	thymopoietin	NM_001032283	791	1130	+
7112	TMPO	thymopoietin	NM_001032283	1181	1590	+
8428	STK24	serine/threonine kinase 24	NM_001032296	319	599	+
10600	USP16	ubiquitin specific peptidase 16	NM_001032410	1171	1280	+
10600	USP16	ubiquitin specific peptidase 16	NM_001032410	1471	1670	+
10600	USP16	ubiquitin specific peptidase 16	NM_001032410	1741	2230	+
6240	RRM1	ribonucleotide reductase M1	NM_001033	1641	1910	+
6240	RRM1	ribonucleotide reductase M1	NM_001033	2514	2837	+
91304	TMEM259	transmembrane protein 259	NM_001033026	1491	1740	+
91304	TMEM259	transmembrane protein 259	NM_001033026	1761	2020	+
51335	NGRN	neugrin, neurite outgrowth associated	NM_001033088	631	990	+
51247	PAIP2	poly(A) binding protein interacting protein 2	NM_001033112	191	510	+
51128	SAR1B	secretion associated, Ras related GTPase 1B	NM_001033503	651	923	+
29086	BABAM1	BRISC and BRCA1 A complex member 1	NM_001033549	231	370	+
57649	PHF12	PHD finger protein 12	NM_001033561	851	980	+
57649	PHF12	PHD finger protein 12	NM_001033561	2041	2290	+
57649	PHF12	PHD finger protein 12	NM_001033561	2351	2560	+
57649	PHF12	PHD finger protein 12	NM_001033561	3471	3670	+
9478	CABP1	calcium binding protein 1	NM_001033677	1221	1370	+
7188	TRAF5	TNF receptor-associated factor 5	NM_001033910	1161	1390	+
7188	TRAF5	TNF receptor-associated factor 5	NM_001033910	1458	1856	+
7188	TRAF5	TNF receptor-associated factor 5	NM_001033910	3081	3718	+
7073	TIAL1	TIA1 cytotoxic granule-associated RNA binding protein-like 1	NM_001033925	1640	1860	+
7073	TIAL1	TIA1 cytotoxic granule-associated RNA binding protein-like 1	NM_001033925	2191	2390	+
7311	UBA52	ubiquitin A-52 residue ribosomal protein fusion product 1	NM_001033930	461	590	+
554313	HIST2H4B	histone cluster 2, H4b	NM_001034077	10	178	+
8890	EIF2B4	eukaryotic translation initiation factor 2B, subunit 4 delta, 67kDa	NM_001034116	135	490	+
5393	EXOSC9	exosome component 9	NM_001034194	861	1090	+
5393	EXOSC9	exosome component 9	NM_001034194	1293	1520	+
162073	ITPRIPL2	inositol 1,4,5-trisphosphate receptor interacting protein-like 2	NM_001034841	241	490	+
162073	ITPRIPL2	inositol 1,4,5-trisphosphate receptor interacting protein-like 2	NM_001034841	1291	1910	+
162073	ITPRIPL2	inositol 1,4,5-trisphosphate receptor interacting protein-like 2	NM_001034841	2041	2140	+
162073	ITPRIPL2	inositol 1,4,5-trisphosphate receptor interacting protein-like 2	NM_001034841	5181	5400	+
54463	FAM134B	family with sequence similarity 134, member B	NM_001034850	131	250	+
54463	FAM134B	family with sequence similarity 134, member B	NM_001034850	1131	1620	+
6103	RPGR	retinitis pigmentosa GTPase regulator	NM_001034853	1871	2060	+
497661	C18orf32	chromosome 18 open reading frame 32	NM_001035005	341	563	+
399665	FAM102A	family with sequence similarity 102, member A	NM_001035254	31	399	+
399665	FAM102A	family with sequence similarity 102, member A	NM_001035254	1591	1990	+
399665	FAM102A	family with sequence similarity 102, member A	NM_001035254	2081	2300	+
399665	FAM102A	family with sequence similarity 102, member A	NM_001035254	3461	3740	+
11147	HHLA3	HERV-H LTR-associating 3	NM_001036645	641	864	+
116840	CNTROB	centrobin, centrosomal BRCA2 interacting protein	NM_001037144	109	230	+
116840	CNTROB	centrobin, centrosomal BRCA2 interacting protein	NM_001037144	781	990	+
116840	CNTROB	centrobin, centrosomal BRCA2 interacting protein	NM_001037144	1711	1930	+
84792	FAM220A	family with sequence similarity 220, member A	NM_001037163	801	1030	+
221937	FOXK1	forkhead box K1	NM_001037165	1391	1520	+
221937	FOXK1	forkhead box K1	NM_001037165	2117	2442	+
221937	FOXK1	forkhead box K1	NM_001037165	2571	2897	+
221937	FOXK1	forkhead box K1	NM_001037165	3011	3140	+
221937	FOXK1	forkhead box K1	NM_001037165	3251	3520	+
221937	FOXK1	forkhead box K1	NM_001037165	3661	4086	+
221937	FOXK1	forkhead box K1	NM_001037165	6524	6680	+
221937	FOXK1	forkhead box K1	NM_001037165	6711	7010	+
221937	FOXK1	forkhead box K1	NM_001037165	7061	7420	+
23597	ACOT9	acyl-CoA thioesterase 9	NM_001037171	1555	1707	+
9453	GGPS1	geranylgeranyl diphosphate synthase 1	NM_001037277	421	647	+
9453	GGPS1	geranylgeranyl diphosphate synthase 1	NM_001037277	1211	1310	+
8662	EIF3B	eukaryotic translation initiation factor 3, subunit B	NM_001037283	2371	2479	+
8662	EIF3B	eukaryotic translation initiation factor 3, subunit B	NM_001037283	2598	2810	+
8662	EIF3B	eukaryotic translation initiation factor 3, subunit B	NM_001037283	2941	3072	+
85441	HELZ2	helicase with zinc finger 2, transcriptional coactivator	NM_001037335	3711	3990	+
85441	HELZ2	helicase with zinc finger 2, transcriptional coactivator	NM_001037335	4221	4618	+
85441	HELZ2	helicase with zinc finger 2, transcriptional coactivator	NM_001037335	5091	5220	+
85441	HELZ2	helicase with zinc finger 2, transcriptional coactivator	NM_001037335	5611	6110	+
85441	HELZ2	helicase with zinc finger 2, transcriptional coactivator	NM_001037335	6411	6730	+
85441	HELZ2	helicase with zinc finger 2, transcriptional coactivator	NM_001037335	6921	7130	+
5142	PDE4B	phosphodiesterase 4B, cAMP-specific	NM_001037340	2140	2820	+
22902	RUFY3	RUN and FYVE domain containing 3	NM_001037442	1491	1910	+
22902	RUFY3	RUN and FYVE domain containing 3	NM_001037442	2091	2410	+
22902	RUFY3	RUN and FYVE domain containing 3	NM_001037442	2471	2638	+
22902	RUFY3	RUN and FYVE domain containing 3	NM_001037442	2681	2780	+
22902	RUFY3	RUN and FYVE domain containing 3	NM_001037442	4415	4550	+
8655	DYNLL1	dynein, light chain, LC8-type 1	NM_001037494	461	660	+
728841	NBPF8	neuroblastoma breakpoint family, member 8	NM_001037501	2580	3000	+
728841	NBPF8	neuroblastoma breakpoint family, member 8	NM_001037501	3061	3276	+
64374	SIL1	SIL1 nucleotide exchange factor	NM_001037633	1381	1718	+
124565	SLC38A10	solute carrier family 38, member 10	NM_001037984	2671	3660	+
26502	NARF	nuclear prelamin A recognition factor	NM_001038618	288	470	+
26502	NARF	nuclear prelamin A recognition factor	NM_001038618	1644	1770	+
56882	CDC42SE1	CDC42 small effector 1	NM_001038707	841	1350	+
5634	PRPS2	phosphoribosyl pyrophosphate synthetase 2	NM_001039091	671	790	+
654483	BOLA2B	bolA family member 2B	NM_001039182	891	1010	+
6430	SRSF5	serine/arginine-rich splicing factor 5	NM_001039465	991	1169	+
2011	MARK2	MAP/microtubule affinity-regulating kinase 2	NM_001039469	2651	3077	+
9870	AREL1	apoptosis resistant E3 ubiquitin protein ligase 1	NM_001039479	3261	3690	+
9870	AREL1	apoptosis resistant E3 ubiquitin protein ligase 1	NM_001039479	5281	5423	+
220134	SKA1	spindle and kinetochore associated complex subunit 1	NM_001039535	921	1050	+
220134	SKA1	spindle and kinetochore associated complex subunit 1	NM_001039535	1991	2120	+
256356	GK5	glycerol kinase 5 (putative)	NM_001039547	1671	1860	+
8239	USP9X	ubiquitin specific peptidase 9, X-linked	NM_001039590	51	312	+
8239	USP9X	ubiquitin specific peptidase 9, X-linked	NM_001039590	461	650	+
8239	USP9X	ubiquitin specific peptidase 9, X-linked	NM_001039590	2741	2890	+
8239	USP9X	ubiquitin specific peptidase 9, X-linked	NM_001039590	6071	6658	+
8239	USP9X	ubiquitin specific peptidase 9, X-linked	NM_001039590	8111	8559	+
8239	USP9X	ubiquitin specific peptidase 9, X-linked	NM_001039590	8667	8820	+
285148	IAH1	isoamyl acetate-hydrolyzing esterase 1 homolog (S. cerevisiae)	NM_001039613	701	900	+
58487	CREBZF	CREB/ATF bZIP transcription factor	NM_001039618	357	1436	+
58487	CREBZF	CREB/ATF bZIP transcription factor	NM_001039618	1437	1675	+
58487	CREBZF	CREB/ATF bZIP transcription factor	NM_001039618	4524	4790	+
58487	CREBZF	CREB/ATF bZIP transcription factor	NM_001039618	4875	5120	+
10419	PRMT5	protein arginine methyltransferase 5	NM_001039619	214	370	+
10419	PRMT5	protein arginine methyltransferase 5	NM_001039619	2331	2587	+
55898	UNC45A	unc-45 homolog A (C. elegans)	NM_001039675	794	1000	+
54921	CHTF8	CTF8, chromosome transmission fidelity factor 8 homolog (S. cerevisiae)	NM_001039690	311	769	+
54921	CHTF8	CTF8, chromosome transmission fidelity factor 8 homolog (S. cerevisiae)	NM_001039690	2411	2795	+
129450	TYW5	tRNA-yW synthesizing protein 5	NM_001039693	291	390	+
129450	TYW5	tRNA-yW synthesizing protein 5	NM_001039693	1019	1320	+
6619	SNAPC3	small nuclear RNA activating complex, polypeptide 3, 50kDa	NM_001039697	601	700	+
7216	TRO	trophinin	NM_001039705	481	670	+
7216	TRO	trophinin	NM_001039705	4051	4370	+
10807	SDCCAG3	serologically defined colon cancer antigen 3	NM_001039707	661	1080	+
80167	C4orf29	chromosome 4 open reading frame 29	NM_001039717	1001	1360	+
998	CDC42	cell division cycle 42	NM_001039802	201	340	+
998	CDC42	cell division cycle 42	NM_001039802	821	1110	+
998	CDC42	cell division cycle 42	NM_001039802	1841	1980	+
53344	CHIC1	cysteine-rich hydrophobic domain 1	NM_001039840	221	370	+
53344	CHIC1	cysteine-rich hydrophobic domain 1	NM_001039840	6426	6875	+
89839	ARHGAP11B	Rho GTPase activating protein 11B	NM_001039841	1	130	+
113177	IZUMO4	IZUMO family member 4	NM_001039846	731	910	+
2879	GPX4	glutathione peroxidase 4	NM_001039848	841	990	+
29888	STRN4	striatin, calmodulin binding protein 4	NM_001039877	731	950	+
29888	STRN4	striatin, calmodulin binding protein 4	NM_001039877	3031	3206	+
974	CD79B	CD79b molecule, immunoglobulin-associated beta	NM_001039933	791	1259	+
2852	GPER1	G protein-coupled estrogen receptor 1	NM_001039966	2681	2830	+
375757	SWI5	SWI5 recombination repair homolog (yeast)	NM_001040011	671	860	+
339231	ARL16	ADP-ribosylation factor-like 16	NM_001040025	621	810	+
963	CD53	CD53 molecule	NM_001040033	51	200	+
963	CD53	CD53 molecule	NM_001040033	772	1400	+
257415	FAM133B	family with sequence similarity 133, member B	NM_001040057	271	514	+
257415	FAM133B	family with sequence similarity 133, member B	NM_001040057	591	961	+
654346	LGALS9C	lectin, galactoside-binding, soluble, 9C	NM_001040078	1471	1710	+
165679	SPTSSB	serine palmitoyltransferase, small subunit B	NM_001040100	548	820	+
165679	SPTSSB	serine palmitoyltransferase, small subunit B	NM_001040100	126	547	+
27030	MLH3	mutL homolog 3	NM_001040108	2831	2950	+
116985	ARAP1	ArfGAP with RhoGAP domain, ankyrin repeat and PH domain 1	NM_001040118	651	1220	+
54896	PQLC2	PQ loop repeat containing 2	NM_001040125	1811	1990	+
54896	PQLC2	PQ loop repeat containing 2	NM_001040125	2141	2240	+
23089	PEG10	paternally expressed 10	NM_001040152	3671	4290	+
23089	PEG10	paternally expressed 10	NM_001040152	4951	5070	+
23089	PEG10	paternally expressed 10	NM_001040152	5851	5960	+
80817	CEP44	centrosomal protein 44kDa	NM_001040157	1861	2080	+
56650	CLDND1	claudin domain containing 1	NM_001040199	561	870	+
64282	PAPD5	PAP associated domain containing 5	NM_001040284	361	660	+
64282	PAPD5	PAP associated domain containing 5	NM_001040284	2047	2394	+
64282	PAPD5	PAP associated domain containing 5	NM_001040284	2431	2590	+
28958	COA3	cytochrome c oxidase assembly factor 3	NM_001040431	421	700	+
51067	YARS2	tyrosyl-tRNA synthetase 2, mitochondrial	NM_001040436	1511	1650	+
51665	ASB1	ankyrin repeat and SOCS box containing 1	NM_001040445	1151	1330	+
54545	MTMR12	myotubularin related protein 12	NM_001040446	1949	2610	+
65010	SLC26A6	solute carrier family 26 (anion exchanger), member 6	NM_001040454	2461	2730	+
51092	SIDT2	SID1 transmembrane family, member 2	NM_001040455	2561	2860	+
55180	LINS	lines homolog (Drosophila)	NM_001040616	1171	1270	+
55180	LINS	lines homolog (Drosophila)	NM_001040616	1823	1970	+
55180	LINS	lines homolog (Drosophila)	NM_001040616	2071	2310	+
467	ATF3	activating transcription factor 3	NM_001040619	1061	1260	+
83988	NCALD	neurocalcin delta	NM_001040630	481	930	+
83988	NCALD	neurocalcin delta	NM_001040630	1221	1390	+
83988	NCALD	neurocalcin delta	NM_001040630	3481	3630	+
79364	ZXDC	ZXD family zinc finger C	NM_001040653	1661	2238	+
3299	HSF4	heat shock transcription factor 4	NM_001040667	451	630	+
3619	INCENP	inner centromere protein antigens 135/155kDa	NM_001040694	961	1090	+
3619	INCENP	inner centromere protein antigens 135/155kDa	NM_001040694	2361	2570	+
23462	HEY1	hes-related family bHLH transcription factor with YRPW motif 1	NM_001040708	961	1234	+
653319	KIAA0895L	KIAA0895-like	NM_001040715	691	850	+
723790	HIST2H2AA4	histone cluster 2, H2aa4	NM_001040874	401	530	+
9989	PPP4R1	protein phosphatase 4, regulatory subunit 1	NM_001042388	1521	1710	+
9989	PPP4R1	protein phosphatase 4, regulatory subunit 1	NM_001042388	3012	3650	+
169792	GLIS3	GLIS family zinc finger 3	NM_001042413	3491	3700	+
55269	PSPC1	paraspeckle component 1	NM_001042414	1081	1350	+
1201	CLN3	ceroid-lipofuscinosis, neuronal 3	NM_001042432	1651	1910	+
831	CAST	calpastatin	NM_001042440	260	440	+
831	CAST	calpastatin	NM_001042440	501	730	+
831	CAST	calpastatin	NM_001042440	1261	1500	+
831	CAST	calpastatin	NM_001042440	1674	1882	+
831	CAST	calpastatin	NM_001042440	2071	2340	+
5660	PSAP	prosaposin	NM_001042465	251	350	+
5660	PSAP	prosaposin	NM_001042465	631	770	+
5660	PSAP	prosaposin	NM_001042465	921	1110	+
26090	ABHD12	abhydrolase domain containing 12	NM_001042472	1584	2101	+
387119	CEP85L	centrosomal protein 85kDa-like	NM_001042475	931	1290	+
387119	CEP85L	centrosomal protein 85kDa-like	NM_001042475	2221	2350	+
387119	CEP85L	centrosomal protein 85kDa-like	NM_001042475	2801	3060	+
23589	CARHSP1	calcium regulated heat stable protein 1, 24kDa	NM_001042476	321	470	+
23589	CARHSP1	calcium regulated heat stable protein 1, 24kDa	NM_001042476	749	915	+
23589	CARHSP1	calcium regulated heat stable protein 1, 24kDa	NM_001042476	916	1056	+
122786	FRMD6	FERM domain containing 6	NM_001042481	2131	2300	+
4763	NF1	neurofibromin 1	NM_001042492	1011	1110	+
4763	NF1	neurofibromin 1	NM_001042492	3081	3230	+
4763	NF1	neurofibromin 1	NM_001042492	5251	5620	+
4763	NF1	neurofibromin 1	NM_001042492	5751	5940	+
4763	NF1	neurofibromin 1	NM_001042492	8031	8160	+
4763	NF1	neurofibromin 1	NM_001042492	8611	9120	+
4763	NF1	neurofibromin 1	NM_001042492	9381	9520	+
57150	SMIM8	small integral membrane protein 8	NM_001042493	251	480	+
9990	SLC12A6	solute carrier family 12 (potassium/chloride transporter), member 6	NM_001042496	101	410	+
9990	SLC12A6	solute carrier family 12 (potassium/chloride transporter), member 6	NM_001042496	821	960	+
9990	SLC12A6	solute carrier family 12 (potassium/chloride transporter), member 6	NM_001042496	3401	3800	+
9990	SLC12A6	solute carrier family 12 (potassium/chloride transporter), member 6	NM_001042496	3871	4486	+
9990	SLC12A6	solute carrier family 12 (potassium/chloride transporter), member 6	NM_001042496	4611	4910	+
84281	C2orf88	chromosome 2 open reading frame 88	NM_001042519	175	782	+
84281	C2orf88	chromosome 2 open reading frame 88	NM_001042519	2981	3080	+
84281	C2orf88	chromosome 2 open reading frame 88	NM_001042519	3181	3320	+
84864	MINA	MYC induced nuclear antigen	NM_001042533	1831	1950	+
84864	MINA	MYC induced nuclear antigen	NM_001042533	2031	2190	+
84864	MINA	MYC induced nuclear antigen	NM_001042533	2471	2570	+
10479	SLC9A6	solute carrier family 9, subfamily A (NHE6, cation proton antiporter 6), member 6	NM_001042537	1931	2201	+
10479	SLC9A6	solute carrier family 9, subfamily A (NHE6, cation proton antiporter 6), member 6	NM_001042537	4081	4432	+
4150	MAZ	MYC-associated zinc finger protein (purine-binding transcription factor)	NM_001042539	171	290	+
4150	MAZ	MYC-associated zinc finger protein (purine-binding transcription factor)	NM_001042539	1051	1240	+
9637	FEZ2	fasciculation and elongation protein zeta 2 (zygin II)	NM_001042548	680	953	+
25936	NSL1	NSL1, MIS12 kinetochore complex component	NM_001042549	751	1003	+
25936	NSL1	NSL1, MIS12 kinetochore complex component	NM_001042549	12641	12780	+
10592	SMC2	structural maintenance of chromosomes 2	NM_001042550	1011	1240	+
10592	SMC2	structural maintenance of chromosomes 2	NM_001042550	1511	1740	+
10592	SMC2	structural maintenance of chromosomes 2	NM_001042550	2451	3136	+
10592	SMC2	structural maintenance of chromosomes 2	NM_001042550	3241	3440	+
10592	SMC2	structural maintenance of chromosomes 2	NM_001042550	5861	6009	+
64772	ENGASE	endo-beta-N-acetylglucosaminidase	NM_001042573	2091	2250	+
64772	ENGASE	endo-beta-N-acetylglucosaminidase	NM_001042573	3731	4130	+
151613	TTC14	tetratricopeptide repeat domain 14	NM_001042601	2331	2573	+
151613	TTC14	tetratricopeptide repeat domain 14	NM_001042601	3401	4217	+
5927	KDM5A	lysine (K)-specific demethylase 5A	NM_001042603	3061	3250	+
5927	KDM5A	lysine (K)-specific demethylase 5A	NM_001042603	3511	3780	+
5927	KDM5A	lysine (K)-specific demethylase 5A	NM_001042603	3811	4018	+
5927	KDM5A	lysine (K)-specific demethylase 5A	NM_001042603	4081	4330	+
5927	KDM5A	lysine (K)-specific demethylase 5A	NM_001042603	4752	5230	+
5927	KDM5A	lysine (K)-specific demethylase 5A	NM_001042603	5301	5580	+
5927	KDM5A	lysine (K)-specific demethylase 5A	NM_001042603	6301	6420	+
84992	PIGY	phosphatidylinositol glycan anchor biosynthesis, class Y	NM_001042616	561	750	+
22906	TRAK1	trafficking protein, kinesin binding 1	NM_001042646	2461	3350	+
22906	TRAK1	trafficking protein, kinesin binding 1	NM_001042646	3931	4090	+
2268	FGR	FGR proto-oncogene, Src family tyrosine kinase	NM_001042747	193	420	+
2268	FGR	FGR proto-oncogene, Src family tyrosine kinase	NM_001042747	1841	2030	+
2268	FGR	FGR proto-oncogene, Src family tyrosine kinase	NM_001042747	2041	2310	+
2268	FGR	FGR proto-oncogene, Src family tyrosine kinase	NM_001042747	2341	2461	+
10735	STAG2	stromal antigen 2	NM_001042749	152	310	+
10735	STAG2	stromal antigen 2	NM_001042749	370	767	+
10735	STAG2	stromal antigen 2	NM_001042749	1131	1460	+
10735	STAG2	stromal antigen 2	NM_001042749	1901	2228	+
10735	STAG2	stromal antigen 2	NM_001042749	3731	3939	+
10276	NET1	neuroepithelial cell transforming 1	NM_001047160	1771	2010	+
65979	PHACTR4	phosphatase and actin regulator 4	NM_001048183	841	1090	+
65979	PHACTR4	phosphatase and actin regulator 4	NM_001048183	1231	1600	+
1104	RCC1	regulator of chromosome condensation 1	NM_001048199	1401	1670	+
1104	RCC1	regulator of chromosome condensation 1	NM_001048199	1951	2220	+
9985	REC8	REC8 meiotic recombination protein	NM_001048205	1071	1250	+
23155	CLCC1	chloride channel CLIC-like 1	NM_001048210	1241	2011	+
55861	DBNDD2	dysbindin (dystrobrevin binding protein 1) domain containing 2	NM_001048226	1021	1200	+
643155	SMIM15	small integral membrane protein 15	NM_001048249	301	704	+
7132	TNFRSF1A	tumor necrosis factor receptor superfamily, member 1A	NM_001065	1461	1811	+
7132	TNFRSF1A	tumor necrosis factor receptor superfamily, member 1A	NM_001065	2054	2194	+
7133	TNFRSF1B	tumor necrosis factor receptor superfamily, member 1B	NM_001066	3051	3646	+
7153	TOP2A	topoisomerase (DNA) II alpha 170kDa	NM_001067	3341	3500	+
7153	TOP2A	topoisomerase (DNA) II alpha 170kDa	NM_001067	3731	4127	+
7153	TOP2A	topoisomerase (DNA) II alpha 170kDa	NM_001067	4631	4899	+
7153	TOP2A	topoisomerase (DNA) II alpha 170kDa	NM_001067	5401	5600	+
7155	TOP2B	topoisomerase (DNA) II beta 180kDa	NM_001068	1	210	+
7155	TOP2B	topoisomerase (DNA) II beta 180kDa	NM_001068	3251	3487	+
7155	TOP2B	topoisomerase (DNA) II beta 180kDa	NM_001068	3741	4355	+
7155	TOP2B	topoisomerase (DNA) II beta 180kDa	NM_001068	4501	4870	+
7283	TUBG1	tubulin, gamma 1	NM_001070	1631	1940	+
7298	TYMS	thymidylate synthetase	NM_001071	111	240	+
440145	MZT1	mitotic spindle organizing protein 1	NM_001071775	170	380	+
55902	ACSS2	acyl-CoA synthetase short-chain family member 2	NM_001076552	2371	2590	+
9057	SLC7A6	solute carrier family 7 (amino acid transporter light chain, y+L system), member 6	NM_001076785	1773	2012	+
9057	SLC7A6	solute carrier family 7 (amino acid transporter light chain, y+L system), member 6	NM_001076785	2661	2808	+
9057	SLC7A6	solute carrier family 7 (amino acid transporter light chain, y+L system), member 6	NM_001076785	3041	3512	+
9057	SLC7A6	solute carrier family 7 (amino acid transporter light chain, y+L system), member 6	NM_001076785	4398	4598	+
9057	SLC7A6	solute carrier family 7 (amino acid transporter light chain, y+L system), member 6	NM_001076785	5571	6036	+
79832	QSER1	glutamine and serine rich 1	NM_001076786	2281	2380	+
79832	QSER1	glutamine and serine rich 1	NM_001076786	3821	4080	+
79832	QSER1	glutamine and serine rich 1	NM_001076786	4228	4467	+
79832	QSER1	glutamine and serine rich 1	NM_001076786	5541	5758	+
7366	UGT2B15	UDP glucuronosyltransferase 2 family, polypeptide B15	NM_001076_2	51	150	+
7367	UGT2B17	UDP glucuronosyltransferase 2 family, polypeptide B17	NM_001077	410	590	+
7367	UGT2B17	UDP glucuronosyltransferase 2 family, polypeptide B17	NM_001077	1541	1785	+
79065	ATG9A	autophagy related 9A	NM_001077198	2901	3230	+
56928	SPPL2B	signal peptide peptidase like 2B	NM_001077238	2370	2637	+
56928	SPPL2B	signal peptide peptidase like 2B	NM_001077238	1652	2330	+
56928	SPPL2B	signal peptide peptidase like 2B	NM_001077238	3071	3170	+
7456	WIPF1	WAS/WASL interacting protein family, member 1	NM_001077269	831	1170	+
7456	WIPF1	WAS/WASL interacting protein family, member 1	NM_001077269	1631	1840	+
55147	RBM23	RNA binding motif protein 23	NM_001077351	241	470	+
55147	RBM23	RNA binding motif protein 23	NM_001077351	1464	1898	+
51611	DPH5	diphthamide biosynthesis 5	NM_001077394	771	1130	+
2778	GNAS	GNAS complex locus	NM_001077490	3551	3723	+
64419	MTMR14	myotubularin related protein 14	NM_001077525	2171	2520	+
414189	AGAP6	ArfGAP with GTPase domain, ankyrin repeat and PH domain 6	NM_001077665	1451	1640	+
414189	AGAP6	ArfGAP with GTPase domain, ankyrin repeat and PH domain 6	NM_001077665	1821	1950	+
414189	AGAP6	ArfGAP with GTPase domain, ankyrin repeat and PH domain 6	NM_001077665	2171	2300	+
79796	ALG9	ALG9, alpha-1,2-mannosyltransferase	NM_001077691	2181	2342	+
6426	SRSF1	serine/arginine-rich splicing factor 1	NM_001078166	113	290	+
6426	SRSF1	serine/arginine-rich splicing factor 1	NM_001078166	1561	1706	+
6426	SRSF1	serine/arginine-rich splicing factor 1	NM_001078166	2553	2966	+
8933	FAM127A	family with sequence similarity 127, member A	NM_001078171	741	930	+
2030	SLC29A1	solute carrier family 29 (equilibrative nucleoside transporter), member 1	NM_001078177	1831	2150	+
2030	SLC29A1	solute carrier family 29 (equilibrative nucleoside transporter), member 1	NM_001078177	2241	2427	+
8881	CDC16	cell division cycle 16	NM_001078645	1801	2290	+
29855	UBN1	ubinuclein 1	NM_001079514	621	790	+
29855	UBN1	ubinuclein 1	NM_001079514	1301	1430	+
29855	UBN1	ubinuclein 1	NM_001079514	1981	2140	+
29855	UBN1	ubinuclein 1	NM_001079514	2641	2880	+
29855	UBN1	ubinuclein 1	NM_001079514	4451	4620	+
22807	IKZF2	IKAROS family zinc finger 2 (Helios)	NM_001079526	401	647	+
22807	IKZF2	IKAROS family zinc finger 2 (Helios)	NM_001079526	1074	1912	+
22807	IKZF2	IKAROS family zinc finger 2 (Helios)	NM_001079526	2071	2310	+
22807	IKZF2	IKAROS family zinc finger 2 (Helios)	NM_001079526	3741	3840	+
122553	TRAPPC6B	trafficking protein particle complex 6B	NM_001079537	911	1070	+
122553	TRAPPC6B	trafficking protein particle complex 6B	NM_001079537	2941	3190	+
221092	HNRNPUL2	heterogeneous nuclear ribonucleoprotein U-like 2	NM_001079559	211	543	+
2118	ETV4	ets variant 4	NM_001079675	2121	2240	+
57189	KIAA1147	KIAA1147	NM_001080392_2	1041	1495	+
57189	KIAA1147	KIAA1147	NM_001080392_2	2211	2560	+
57189	KIAA1147	KIAA1147	NM_001080392_2	4266	4517	+
57189	KIAA1147	KIAA1147	NM_001080392_2	5291	5477	+
57189	KIAA1147	KIAA1147	NM_001080392_2	6596	7030	+
23514	SPIDR	scaffolding protein involved in DNA repair	NM_001080394	721	890	+
23514	SPIDR	scaffolding protein involved in DNA repair	NM_001080394	2741	2968	+
23392	KIAA0368	KIAA0368	NM_001080398	2731	2930	+
23392	KIAA0368	KIAA0368	NM_001080398	5441	5700	+
23392	KIAA0368	KIAA0368	NM_001080398	5945	6166	+
150726	FBXO41	F-box protein 41	NM_001080410	1	140	+
150726	FBXO41	F-box protein 41	NM_001080410	621	955	+
150726	FBXO41	F-box protein 41	NM_001080410	1191	1500	+
150726	FBXO41	F-box protein 41	NM_001080410	2531	2959	+
150726	FBXO41	F-box protein 41	NM_001080410	3031	3130	+
150726	FBXO41	F-box protein 41	NM_001080410	6801	6920	+
253461	ZBTB38	zinc finger and BTB domain containing 38	NM_001080412	3771	4000	+
253461	ZBTB38	zinc finger and BTB domain containing 38	NM_001080412	4371	4550	+
253461	ZBTB38	zinc finger and BTB domain containing 38	NM_001080412	6261	6380	+
440193	CCDC88C	coiled-coil domain containing 88C	NM_001080414	2351	2460	+
440193	CCDC88C	coiled-coil domain containing 88C	NM_001080414	2481	2740	+
440193	CCDC88C	coiled-coil domain containing 88C	NM_001080414	5573	5910	+
440193	CCDC88C	coiled-coil domain containing 88C	NM_001080414	5351	5567	+
440193	CCDC88C	coiled-coil domain containing 88C	NM_001080414	6035	6340	+
23350	U2SURP	U2 snRNP-associated SURP domain containing	NM_001080415	299	640	+
23350	U2SURP	U2 snRNP-associated SURP domain containing	NM_001080415	641	803	+
23350	U2SURP	U2 snRNP-associated SURP domain containing	NM_001080415	1011	1150	+
23350	U2SURP	U2 snRNP-associated SURP domain containing	NM_001080415	1161	1380	+
23350	U2SURP	U2 snRNP-associated SURP domain containing	NM_001080415	2580	3187	+
23135	KDM6B	lysine (K)-specific demethylase 6B	NM_001080424	2011	2290	+
23135	KDM6B	lysine (K)-specific demethylase 6B	NM_001080424	2601	3040	+
23135	KDM6B	lysine (K)-specific demethylase 6B	NM_001080424	3119	3520	+
56271	BEX4	brain expressed, X-linked 4	NM_001080425	171	410	+
123720	WHAMM	WAS protein homolog associated with actin, golgi membranes and microtubules	NM_001080435	2321	2591	+
56927	GPR108	G protein-coupled receptor 108	NM_001080452	71	190	+
56927	GPR108	G protein-coupled receptor 108	NM_001080452	1791	1921	+
26173	INTS1	integrator complex subunit 1	NM_001080453	951	1110	+
26173	INTS1	integrator complex subunit 1	NM_001080453	3951	4150	+
26173	INTS1	integrator complex subunit 1	NM_001080453	6841	6970	+
26173	INTS1	integrator complex subunit 1	NM_001080453	6641	6827	+
23403	FBXO46	F-box protein 46	NM_001080469	1091	1270	+
23403	FBXO46	F-box protein 46	NM_001080469	1871	1970	+
64283	ARHGEF28	Rho guanine nucleotide exchange factor (GEF) 28	NM_001080479	4951	5110	+
154141	MBOAT1	membrane bound O-acyltransferase domain containing 1	NM_001080480	1574	1970	+
154141	MBOAT1	membrane bound O-acyltransferase domain containing 1	NM_001080480	2424	2764	+
85015	USP45	ubiquitin specific peptidase 45	NM_001080481	2027	2307	+
10838	ZNF275	zinc finger protein 275	NM_001080485	361	730	+
10838	ZNF275	zinc finger protein 275	NM_001080485	1095	1250	+
10838	ZNF275	zinc finger protein 275	NM_001080485	1261	1520	+
10838	ZNF275	zinc finger protein 275	NM_001080485	2371	2570	+
10838	ZNF275	zinc finger protein 275	NM_001080485	3161	3650	+
10838	ZNF275	zinc finger protein 275	NM_001080485	5261	5670	+
84629	TNRC18	trinucleotide repeat containing 18	NM_001080495	981	1200	+
84629	TNRC18	trinucleotide repeat containing 18	NM_001080495	1538	1780	+
84629	TNRC18	trinucleotide repeat containing 18	NM_001080495	3911	4440	+
84629	TNRC18	trinucleotide repeat containing 18	NM_001080495	7411	7900	+
84629	TNRC18	trinucleotide repeat containing 18	NM_001080495	8301	8400	+
9827	RGP1	RGP1 retrograde golgi transport homolog (S. cerevisiae)	NM_001080496	1161	1500	+
79064	TMEM223	transmembrane protein 223	NM_001080501	501	770	+
126075	CCDC159	coiled-coil domain containing 159	NM_001080503	911	1057	+
84747	UNC119B	unc-119 homolog B (C. elegans)	NM_001080533	17	270	+
84747	UNC119B	unc-119 homolog B (C. elegans)	NM_001080533	4091	4190	+
84747	UNC119B	unc-119 homolog B (C. elegans)	NM_001080533	4271	4400	+
58509	CACTIN	cactin, spliceosome C complex subunit	NM_001080543	2501	2600	+
58509	CACTIN	cactin, spliceosome C complex subunit	NM_001080543	2861	3040	+
6688	SPI1	Spi-1 proto-oncogene	NM_001080547	981	1280	+
4641	MYO1C	myosin IC	NM_001080779	3351	3770	+
4641	MYO1C	myosin IC	NM_001080779	4251	4590	+
90416	C15orf57	chromosome 15 open reading frame 57	NM_001080791	861	1190	+
144404	TMEM120B	transmembrane protein 120B	NM_001080825	1111	1360	+
157285	SGK223	homolog of rat pragma of Rnd2	NM_001080826	2051	2180	+
23210	JMJD6	jumonji domain containing 6	NM_001081461	431	700	+
23210	JMJD6	jumonji domain containing 6	NM_001081461	1041	1190	+
10482	NXF1	nuclear RNA export factor 1	NM_001081491	1932	2130	+
10482	NXF1	nuclear RNA export factor 1	NM_001081491	3931	4069	+
57187	THOC2	THO complex 2	NM_001081550	927	1130	+
57187	THOC2	THO complex 2	NM_001081550	2061	2198	+
57187	THOC2	THO complex 2	NM_001081550	2701	2950	+
57187	THOC2	THO complex 2	NM_001081550	4289	4864	+
65057	ACD	adrenocortical dysplasia homolog (mouse)	NM_001082486	1491	1770	+
146691	TOM1L2	target of myb1-like 2 (chicken)	NM_001082968	1701	2210	+
146691	TOM1L2	target of myb1-like 2 (chicken)	NM_001082968	2297	2590	+
146691	TOM1L2	target of myb1-like 2 (chicken)	NM_001082968	2621	2900	+
146691	TOM1L2	target of myb1-like 2 (chicken)	NM_001082968	3161	3310	+
2820	GPD2	glycerol-3-phosphate dehydrogenase 2 (mitochondrial)	NM_001083112	2448	2651	+
2820	GPD2	glycerol-3-phosphate dehydrogenase 2 (mitochondrial)	NM_001083112	3661	3780	+
89846	FGD3	FYVE, RhoGEF and PH domain containing 3	NM_001083536	2801	3040	+
79903	NAA60	N(alpha)-acetyltransferase 60, NatF catalytic subunit	NM_001083601	1301	1530	+
79903	NAA60	N(alpha)-acetyltransferase 60, NatF catalytic subunit	NM_001083601	2271	2420	+
5727	PTCH1	patched 1	NM_001083602	461	670	+
5727	PTCH1	patched 1	NM_001083602	2561	2670	+
5727	PTCH1	patched 1	NM_001083602	4061	4402	+
5727	PTCH1	patched 1	NM_001083602	4511	4780	+
124454	EARS2	glutamyl-tRNA synthetase 2, mitochondrial	NM_001083614	1561	1944	+
124454	EARS2	glutamyl-tRNA synthetase 2, mitochondrial	NM_001083614	2251	2463	+
9923	ZBTB40	zinc finger and BTB domain containing 40	NM_001083621	4071	4260	+
9923	ZBTB40	zinc finger and BTB domain containing 40	NM_001083621	5681	5820	+
29966	STRN3	striatin, calmodulin binding protein 3	NM_001083893	2554	2860	+
63892	THADA	thyroid adenoma associated	NM_001083953	1401	1610	+
63892	THADA	thyroid adenoma associated	NM_001083953	1661	1820	+
63892	THADA	thyroid adenoma associated	NM_001083953	5973	6276	+
79027	ZNF655	zinc finger protein 655	NM_001083956	215	340	+
79027	ZNF655	zinc finger protein 655	NM_001083956	611	1120	+
79027	ZNF655	zinc finger protein 655	NM_001083956	1431	1690	+
79027	ZNF655	zinc finger protein 655	NM_001083956	1781	2236	+
284403	WDR62	WD repeat domain 62	NM_001083961	3851	4170	+
284403	WDR62	WD repeat domain 62	NM_001083961	4581	4740	+
6925	TCF4	transcription factor 4	NM_001083962	2251	2390	+
6925	TCF4	transcription factor 4	NM_001083962	2561	2963	+
6925	TCF4	transcription factor 4	NM_001083962	5751	5880	+
6925	TCF4	transcription factor 4	NM_001083962	6271	6480	+
790955	UQCC3	ubiquinol-cytochrome c reductase complex assembly factor 3	NM_001085372	371	612	+
133686	NADK2	NAD kinase 2, mitochondrial	NM_001085411	1411	1610	+
28964	GIT1	G protein-coupled receptor kinase interacting ArfGAP 1	NM_001085454	2441	2660	+
28964	GIT1	G protein-coupled receptor kinase interacting ArfGAP 1	NM_001085454	3241	3550	+
1500	CTNND1	catenin (cadherin-associated protein), delta 1	NM_001085458	71	230	+
1500	CTNND1	catenin (cadherin-associated protein), delta 1	NM_001085458	981	1390	+
1500	CTNND1	catenin (cadherin-associated protein), delta 1	NM_001085458	1821	2010	+
1500	CTNND1	catenin (cadherin-associated protein), delta 1	NM_001085458	3461	3730	+
1500	CTNND1	catenin (cadherin-associated protein), delta 1	NM_001085458	3791	4210	+
1500	CTNND1	catenin (cadherin-associated protein), delta 1	NM_001085458	4231	4380	+
114803	MYSM1	Myb-like, SWIRM and MPN domains 1	NM_001085487	491	1130	+
114803	MYSM1	Myb-like, SWIRM and MPN domains 1	NM_001085487	1521	1640	+
114803	MYSM1	Myb-like, SWIRM and MPN domains 1	NM_001085487	2311	2508	+
114803	MYSM1	Myb-like, SWIRM and MPN domains 1	NM_001085487	5091	5258	+
284184	C17orf89	chromosome 17 open reading frame 89	NM_001086521	451	550	+
14	AAMP	angio-associated, migratory cell protein	NM_001087	59	429	+
21	ABCA3	ATP-binding cassette, sub-family A (ABC1), member 3	NM_001089	6161	6340	+
80006	TRAPPC13	trafficking protein particle complex 13	NM_001093755	1041	1250	+
47	ACLY	ATP citrate lyase	NM_001096	42	150	+
47	ACLY	ATP citrate lyase	NM_001096	1361	1660	+
47	ACLY	ATP citrate lyase	NM_001096	2991	3170	+
47	ACLY	ATP citrate lyase	NM_001096	3481	3670	+
653519	GPR89A	G protein-coupled receptor 89A	NM_001097613	82	219	+
653519	GPR89A	G protein-coupled receptor 89A	NM_001097613	1743	2001	+
653519	GPR89A	G protein-coupled receptor 89A	NM_001097613	1480	1671	+
548644	POLR2J3	polymerase (RNA) II (DNA directed) polypeptide J3	NM_001097615	63	270	+
2650	GCNT1	glucosaminyl (N-acetyl) transferase 1, core 2	NM_001097634	1981	2290	+
50	ACO2	aconitase 2, mitochondrial	NM_001098	2372	2634	+
3185	HNRNPF	heterogeneous nuclear ribonucleoprotein F	NM_001098208	552	840	+
3185	HNRNPF	heterogeneous nuclear ribonucleoprotein F	NM_001098208	1041	1250	+
3157	HMGCS1	3-hydroxy-3-methylglutaryl-CoA synthase 1 (soluble)	NM_001098272	339	613	+
3157	HMGCS1	3-hydroxy-3-methylglutaryl-CoA synthase 1 (soluble)	NM_001098272	1681	1812	+
3157	HMGCS1	3-hydroxy-3-methylglutaryl-CoA synthase 1 (soluble)	NM_001098272	2241	2460	+
1314	COPA	coatomer protein complex, subunit alpha	NM_001098398	309	470	+
1314	COPA	coatomer protein complex, subunit alpha	NM_001098398	2911	3150	+
1314	COPA	coatomer protein complex, subunit alpha	NM_001098398	4151	4300	+
1314	COPA	coatomer protein complex, subunit alpha	NM_001098398	4331	4490	+
1314	COPA	coatomer protein complex, subunit alpha	NM_001098398	4541	4790	+
49854	ZBTB21	zinc finger and BTB domain containing 21	NM_001098402	631	810	+
49854	ZBTB21	zinc finger and BTB domain containing 21	NM_001098402	1521	1680	+
49854	ZBTB21	zinc finger and BTB domain containing 21	NM_001098402	2061	2260	+
49854	ZBTB21	zinc finger and BTB domain containing 21	NM_001098402	3071	3510	+
6603	SMARCD2	SWI/SNF related, matrix associated, actin dependent regulator of chromatin, subfamily d, member 2	NM_001098426	61	340	+
6603	SMARCD2	SWI/SNF related, matrix associated, actin dependent regulator of chromatin, subfamily d, member 2	NM_001098426	2671	2770	+
10521	DDX17	DEAD (Asp-Glu-Ala-Asp) box helicase 17	NM_001098504	1514	1860	+
10521	DDX17	DEAD (Asp-Glu-Ala-Asp) box helicase 17	NM_001098504	1871	2070	+
10521	DDX17	DEAD (Asp-Glu-Ala-Asp) box helicase 17	NM_001098504	2171	2382	+
10521	DDX17	DEAD (Asp-Glu-Ala-Asp) box helicase 17	NM_001098504	4521	4700	+
7756	ZNF207	zinc finger protein 207	NM_001098507	301	550	+
7756	ZNF207	zinc finger protein 207	NM_001098507	1141	1300	+
10553	HTATIP2	HIV-1 Tat interactive protein 2, 30kDa	NM_001098522	961	1080	+
26586	CKAP2	cytoskeleton associated protein 2	NM_001098525	811	960	+
8078	USP5	ubiquitin specific peptidase 5 (isopeptidase T)	NM_001098536	1501	1670	+
8078	USP5	ubiquitin specific peptidase 5 (isopeptidase T)	NM_001098536	2591	2890	+
8078	USP5	ubiquitin specific peptidase 5 (isopeptidase T)	NM_001098536	3071	3189	+
7009	TMBIM6	transmembrane BAX inhibitor motif containing 6	NM_001098576	437	585	+
7009	TMBIM6	transmembrane BAX inhibitor motif containing 6	NM_001098576	1171	1620	+
25912	C1orf43	chromosome 1 open reading frame 43	NM_001098616	972	1373	+
25912	C1orf43	chromosome 1 open reading frame 43	NM_001098616	1791	1890	+
3663	IRF5	interferon regulatory factor 5	NM_001098627	1656	2070	+
254225	RNF169	ring finger protein 169	NM_001098638	1541	1780	+
254225	RNF169	ring finger protein 169	NM_001098638	7541	7809	+
11102	RPP14	ribonuclease P/MRP 14kDa subunit	NM_001098783	869	1287	+
125228	FAM210A	family with sequence similarity 210, member A	NM_001098801	368	740	+
125228	FAM210A	family with sequence similarity 210, member A	NM_001098801	1051	1309	+
125228	FAM210A	family with sequence similarity 210, member A	NM_001098801	4121	4340	+
125476	INO80C	INO80 complex subunit C	NM_001098817	721	953	+
641649	TMEM91	transmembrane protein 91	NM_001098821	871	1070	+
84923	FAM104A	family with sequence similarity 104, member A	NM_001098832	2001	2290	+
643641	ZNF862	zinc finger protein 862	NM_001099220	871	1087	+
643641	ZNF862	zinc finger protein 862	NM_001099220	3571	3770	+
403341	ZBTB34	zinc finger and BTB domain containing 34	NM_001099270	1351	1621	+
5757	PTMA	prothymosin, alpha	NM_001099285	271	520	+
113115	MTFR2	mitochondrial fission regulator 2	NM_001099286	1011	1200	+
8812	CCNK	cyclin K	NM_001099402	921	1551	+
8812	CCNK	cyclin K	NM_001099402	1687	1830	+
7994	KAT6A	K(lysine) acetyltransferase 6A	NM_001099412	371	470	+
7994	KAT6A	K(lysine) acetyltransferase 6A	NM_001099412	3231	3480	+
7994	KAT6A	K(lysine) acetyltransferase 6A	NM_001099412	4128	4340	+
7994	KAT6A	K(lysine) acetyltransferase 6A	NM_001099412	6201	6618	+
100101267	POM121C	POM121 transmembrane nucleoporin C	NM_001099415	2301	2690	+
100101267	POM121C	POM121 transmembrane nucleoporin C	NM_001099415	3851	4150	+
100101267	POM121C	POM121 transmembrane nucleoporin C	NM_001099415	5001	5130	+
54828	BCAS3	breast carcinoma amplified sequence 3	NM_001099432	2791	3200	+
25989	ULK3	unc-51 like kinase 3	NM_001099436	1541	1710	+
200916	RPL22L1	ribosomal protein L22-like 1	NM_001099645	411	550	+
728689	EIF3CL	eukaryotic translation initiation factor 3, subunit C-like	NM_001099661	771	1120	+
728689	EIF3CL	eukaryotic translation initiation factor 3, subunit C-like	NM_001099661	2821	2920	+
375743	PTAR1	protein prenyltransferase alpha subunit repeat containing 1	NM_001099666	950	1193	+
375743	PTAR1	protein prenyltransferase alpha subunit repeat containing 1	NM_001099666	1571	1740	+
375743	PTAR1	protein prenyltransferase alpha subunit repeat containing 1	NM_001099666	6121	6250	+
116064	LRRC58	leucine rich repeat containing 58	NM_001099678	1101	1330	+
727866	FAM156B	family with sequence similarity 156, member B	NM_001099684	921	1260	+
143244	EIF5AL1	eukaryotic translation initiation factor 5A-like 1	NM_001099692	702	814	+
84292	WDR83	WD repeat domain 83	NM_001099737	1231	1448	+
3384	ICAM2	intercellular adhesion molecule 2	NM_001099786	791	910	+
3384	ICAM2	intercellular adhesion molecule 2	NM_001099786	1185	1330	+
201931	TMEM192	transmembrane protein 192	NM_001100389	851	1090	+
23244	PDS5A	PDS5 cohesin associated factor A	NM_001100399	1701	1920	+
23244	PDS5A	PDS5 cohesin associated factor A	NM_001100399	2601	2830	+
23244	PDS5A	PDS5 cohesin associated factor A	NM_001100399	4071	4908	+
54149	C21orf91	chromosome 21 open reading frame 91	NM_001100420	330	1080	+
54149	C21orf91	chromosome 21 open reading frame 91	NM_001100420	25	329	+
54542	RC3H2	ring finger and CCCH-type domains 2	NM_001100588	3721	3873	+
91768	CABLES1	Cdk5 and Abl enzyme substrate 1	NM_001100619	61	380	+
91768	CABLES1	Cdk5 and Abl enzyme substrate 1	NM_001100619	551	800	+
91768	CABLES1	Cdk5 and Abl enzyme substrate 1	NM_001100619	1891	2280	+
55839	CENPN	centromere protein N	NM_001100624	1581	1720	+
55839	CENPN	centromere protein N	NM_001100624	4211	4400	+
100113407	TMEM170B	transmembrane protein 170B	NM_001100829	441	610	+
254295	PHYHD1	phytanoyl-CoA dioxygenase domain containing 1	NM_001100876	1971	2130	+
653820	FAM72B	family with sequence similarity 72, member B	NM_001100910	40	508	+
23241	PACS2	phosphofurin acidic cluster sorting protein 2	NM_001100913	3201	3540	+
60	ACTB	actin, beta	NM_001101	51	170	+
60	ACTB	actin, beta	NM_001101	1093	1490	+
30827	CXXC1	CXXC finger protein 1	NM_001101654	628	730	+
30827	CXXC1	CXXC finger protein 1	NM_001101654	961	1120	+
30827	CXXC1	CXXC finger protein 1	NM_001101654	1642	1850	+
30827	CXXC1	CXXC finger protein 1	NM_001101654	2751	2958	+
51317	PHF21A	PHD finger protein 21A	NM_001101802	401	570	+
51317	PHF21A	PHD finger protein 21A	NM_001101802	1471	1570	+
51317	PHF21A	PHD finger protein 21A	NM_001101802	2431	2929	+
80143	SIKE1	suppressor of IKBKE 1	NM_001102396	21	290	+
80143	SIKE1	suppressor of IKBKE 1	NM_001102396	371	530	+
80143	SIKE1	suppressor of IKBKE 1	NM_001102396	551	853	+
10236	HNRNPR	heterogeneous nuclear ribonucleoprotein R	NM_001102398	1651	1820	+
10236	HNRNPR	heterogeneous nuclear ribonucleoprotein R	NM_001102398	1861	2090	+
7763	ZFAND5	zinc finger, AN1-type domain 5	NM_001102420	1241	1390	+
7763	ZFAND5	zinc finger, AN1-type domain 5	NM_001102420	1871	2140	+
84513	PPAPDC1B	phosphatidic acid phosphatase type 2 domain containing 1B	NM_001102559	711	860	+
84513	PPAPDC1B	phosphatidic acid phosphatase type 2 domain containing 1B	NM_001102559	1721	2025	+
90338	ZNF160	zinc finger protein 160	NM_001102603	891	1030	+
54726	OTUD4	OTU deubiquitinase 4	NM_001102653	981	1170	+
54726	OTUD4	OTU deubiquitinase 4	NM_001102653	1381	1630	+
54726	OTUD4	OTU deubiquitinase 4	NM_001102653	2135	2514	+
54726	OTUD4	OTU deubiquitinase 4	NM_001102653	2626	3531	+
91607	SLFN11	schlafen family member 11	NM_001104587	1851	2130	+
91607	SLFN11	schlafen family member 11	NM_001104587	2511	2640	+
91607	SLFN11	schlafen family member 11	NM_001104587	2701	3190	+
91607	SLFN11	schlafen family member 11	NM_001104587	4371	4550	+
55007	FAM118A	family with sequence similarity 118, member A	NM_001104595	1788	2083	+
55186	SLC25A36	solute carrier family 25 (pyrimidine nucleotide carrier), member 36	NM_001104647	127	300	+
55186	SLC25A36	solute carrier family 25 (pyrimidine nucleotide carrier), member 36	NM_001104647	1015	1320	+
55186	SLC25A36	solute carrier family 25 (pyrimidine nucleotide carrier), member 36	NM_001104647	657	805	+
55186	SLC25A36	solute carrier family 25 (pyrimidine nucleotide carrier), member 36	NM_001104647	2451	2714	+
55186	SLC25A36	solute carrier family 25 (pyrimidine nucleotide carrier), member 36	NM_001104647	4071	4243	+
23623	RUSC1	RUN and SH3 domain containing 1	NM_001105203	2231	2400	+
9070	ASH2L	ash2 (absent, small, or homeotic)-like (Drosophila)	NM_001105214	961	1140	+
9070	ASH2L	ash2 (absent, small, or homeotic)-like (Drosophila)	NM_001105214	1941	2300	+
9765	ZFYVE16	zinc finger, FYVE domain containing 16	NM_001105251	511	610	+
9765	ZFYVE16	zinc finger, FYVE domain containing 16	NM_001105251	4381	4500	+
9765	ZFYVE16	zinc finger, FYVE domain containing 16	NM_001105251	6217	6380	+
7701	ZNF142	zinc finger protein 142	NM_001105537	5511	5694	+
8525	DGKZ	diacylglycerol kinase, zeta	NM_001105540	3371	4071	+
9473	THEMIS2	thymocyte selection associated family member 2	NM_001105556	1421	1610	+
9473	THEMIS2	thymocyte selection associated family member 2	NM_001105556	2001	2190	+
9473	THEMIS2	thymocyte selection associated family member 2	NM_001105556	2421	2590	+
10277	UBE4B	ubiquitination factor E4B	NM_001105562	211	500	+
10277	UBE4B	ubiquitination factor E4B	NM_001105562	4381	4620	+
10277	UBE4B	ubiquitination factor E4B	NM_001105562	4681	4870	+
10277	UBE4B	ubiquitination factor E4B	NM_001105562	4951	5150	+
390916	NUDT19	nudix (nucleoside diphosphate linked moiety X)-type motif 19	NM_001105570	224	590	+
390916	NUDT19	nudix (nucleoside diphosphate linked moiety X)-type motif 19	NM_001105570	961	1159	+
200933	FBXO45	F-box protein 45	NM_001105573	771	1150	+
101	ADAM8	ADAM metallopeptidase domain 8	NM_001109	2888	3130	+
283450	HECTD4	HECT domain containing E3 ubiquitin protein ligase 4	NM_001109662	241	340	+
283450	HECTD4	HECT domain containing E3 ubiquitin protein ligase 4	NM_001109662	9581	9930	+
283450	HECTD4	HECT domain containing E3 ubiquitin protein ligase 4	NM_001109662	10531	10820	+
283450	HECTD4	HECT domain containing E3 ubiquitin protein ligase 4	NM_001109662	11301	11550	+
283450	HECTD4	HECT domain containing E3 ubiquitin protein ligase 4	NM_001109662	14951	15157	+
102	ADAM10	ADAM metallopeptidase domain 10	NM_001110	190	300	+
102	ADAM10	ADAM metallopeptidase domain 10	NM_001110	2701	3114	+
2316	FLNA	filamin A, alpha	NM_001110556	1151	1270	+
2316	FLNA	filamin A, alpha	NM_001110556	3591	3960	+
2316	FLNA	filamin A, alpha	NM_001110556	8241	8380	+
54	ACP5	acid phosphatase 5, tartrate resistant	NM_001111035	1131	1540	+
5141	PDE4A	phosphodiesterase 4A, cAMP-specific	NM_001111307	2041	2461	+
5141	PDE4A	phosphodiesterase 4A, cAMP-specific	NM_001111307	2541	2903	+
79039	DDX54	DEAD (Asp-Glu-Ala-Asp) box polypeptide 54	NM_001111322	2621	2740	+
79039	DDX54	DEAD (Asp-Glu-Ala-Asp) box polypeptide 54	NM_001111322	2771	3000	+
23272	FAM208A	family with sequence similarity 208, member A	NM_001112736	191	500	+
23272	FAM208A	family with sequence similarity 208, member A	NM_001112736	2001	2310	+
23272	FAM208A	family with sequence similarity 208, member A	NM_001112736	2424	2720	+
23272	FAM208A	family with sequence similarity 208, member A	NM_001112736	3001	3412	+
23272	FAM208A	family with sequence similarity 208, member A	NM_001112736	4624	5253	+
100131187	TSTD1	thiosulfate sulfurtransferase (rhodanese)-like domain containing 1	NM_001113205	551	662	+
100134934	TEN1	TEN1 CST complex subunit	NM_001113324	591	990	+
55215	FANCI	Fanconi anemia, complementation group I	NM_001113378	2111	2320	+
55215	FANCI	Fanconi anemia, complementation group I	NM_001113378	3932	4164	+
55215	FANCI	Fanconi anemia, complementation group I	NM_001113378	4430	4596	+
8874	ARHGEF7	Rho guanine nucleotide exchange factor (GEF) 7	NM_001113511	400	505	+
8874	ARHGEF7	Rho guanine nucleotide exchange factor (GEF) 7	NM_001113511	991	1100	+
8874	ARHGEF7	Rho guanine nucleotide exchange factor (GEF) 7	NM_001113511	1441	1600	+
8874	ARHGEF7	Rho guanine nucleotide exchange factor (GEF) 7	NM_001113511	1981	2380	+
165631	PARP15	poly (ADP-ribose) polymerase family, member 15	NM_001113523	81	180	+
165631	PARP15	poly (ADP-ribose) polymerase family, member 15	NM_001113523	1651	2100	+
92822	ZNF276	zinc finger protein 276	NM_001113525	2071	2230	+
1890	TYMP	thymidine phosphorylase	NM_001113756	321	480	+
113	ADCY7	adenylate cyclase 7	NM_001114	1	170	+
113	ADCY7	adenylate cyclase 7	NM_001114	1791	1930	+
113	ADCY7	adenylate cyclase 7	NM_001114	3355	4020	+
113	ADCY7	adenylate cyclase 7	NM_001114	4221	4320	+
113	ADCY7	adenylate cyclase 7	NM_001114	4597	5020	+
996	CDC27	cell division cycle 27	NM_001114091	48	240	+
996	CDC27	cell division cycle 27	NM_001114091	931	1140	+
996	CDC27	cell division cycle 27	NM_001114091	1151	1538	+
996	CDC27	cell division cycle 27	NM_001114091	2461	2950	+
996	CDC27	cell division cycle 27	NM_001114091	3061	3230	+
996	CDC27	cell division cycle 27	NM_001114091	3371	3540	+
26065	LSM14A	LSM14A, SCD6 homolog A (S. cerevisiae)	NM_001114093_2	69	280	+
26065	LSM14A	LSM14A, SCD6 homolog A (S. cerevisiae)	NM_001114093_2	881	1230	+
26065	LSM14A	LSM14A, SCD6 homolog A (S. cerevisiae)	NM_001114093_2	3241	3380	+
55421	C17orf85	chromosome 17 open reading frame 85	NM_001114118	1001	1370	+
55421	C17orf85	chromosome 17 open reading frame 85	NM_001114118	1641	1830	+
55421	C17orf85	chromosome 17 open reading frame 85	NM_001114118	2221	2627	+
2002	ELK1	ELK1, member of ETS oncogene family	NM_001114123	1681	1810	+
51135	IRAK4	interleukin-1 receptor-associated kinase 4	NM_001114182	1641	1780	+
51135	IRAK4	interleukin-1 receptor-associated kinase 4	NM_001114182	2261	2690	+
167153	PAPD4	PAP associated domain containing 4	NM_001114394	221	430	+
167153	PAPD4	PAP associated domain containing 4	NM_001114394	1651	1920	+
100134938	UPK3BL	uroplakin 3B-like	NM_001114403	1	120	+
26099	SZRD1	SUZ RNA binding domain containing 1	NM_001114600	218	430	+
26099	SZRD1	SUZ RNA binding domain containing 1	NM_001114600	611	965	+
4245	MGAT1	mannosyl (alpha-1,3-)-glycoprotein beta-1,2-N-acetylglucosaminyltransferase	NM_001114618	261	600	+
4245	MGAT1	mannosyl (alpha-1,3-)-glycoprotein beta-1,2-N-acetylglucosaminyltransferase	NM_001114618	1101	1300	+
4245	MGAT1	mannosyl (alpha-1,3-)-glycoprotein beta-1,2-N-acetylglucosaminyltransferase	NM_001114618	1351	2030	+
100137049	PLA2G4B	phospholipase A2, group IVB (cytosolic)	NM_001114633	2591	2722	+
55120	FANCL	Fanconi anemia, complementation group L	NM_001114636	1211	1565	+
1604	CD55	CD55 molecule, decay accelerating factor for complement (Cromer blood group)	NM_001114752	1151	1320	+
55683	KANSL3	KAT8 regulatory NSL complex subunit 3	NM_001115016	1901	2000	+
55683	KANSL3	KAT8 regulatory NSL complex subunit 3	NM_001115016	3051	4030	+
55683	KANSL3	KAT8 regulatory NSL complex subunit 3	NM_001115016	4531	4730	+
10227	MFSD10	major facilitator superfamily domain containing 10	NM_001120	251	400	+
10227	MFSD10	major facilitator superfamily domain containing 10	NM_001120	1061	1190	+
10227	MFSD10	major facilitator superfamily domain containing 10	NM_001120	1674	1941	+
123	PLIN2	perilipin 2	NM_001122	1341	1610	+
116986	AGAP2	ArfGAP with GTPase domain, ankyrin repeat and PH domain 2	NM_001122772	3491	3930	+
9328	GTF3C5	general transcription factor IIIC, polypeptide 5, 63kDa	NM_001122823	1851	2065	+
9328	GTF3C5	general transcription factor IIIC, polypeptide 5, 63kDa	NM_001122823	2211	2439	+
26580	BSCL2	Berardinelli-Seip congenital lipodystrophy 2 (seipin)	NM_001122955	457	630	+
28988	DBNL	drebrin-like	NM_001122956	71	230	+
28988	DBNL	drebrin-like	NM_001122956	611	857	+
10295	BCKDK	branched chain ketoacid dehydrogenase kinase	NM_001122957	1341	1508	+
10295	BCKDK	branched chain ketoacid dehydrogenase kinase	NM_001122957	1711	1996	+
57223	SMEK2	SMEK homolog 2, suppressor of mek1 (Dictyostelium)	NM_001122964	73	356	+
57223	SMEK2	SMEK homolog 2, suppressor of mek1 (Dictyostelium)	NM_001122964	721	1276	+
57223	SMEK2	SMEK homolog 2, suppressor of mek1 (Dictyostelium)	NM_001122964	2504	2790	+
57223	SMEK2	SMEK homolog 2, suppressor of mek1 (Dictyostelium)	NM_001122964	2981	3210	+
132	ADK	adenosine kinase	NM_001123	1391	1522	+
644591	PPIAL4G	peptidylprolyl isomerase A (cyclophilin A)-like 4G	NM_001123068	624	730	+
729533	FAM72A	family with sequence similarity 72, member A	NM_001123168	1	300	+
5537	PPP6C	protein phosphatase 6, catalytic subunit	NM_001123355	1631	1798	+
133	ADM	adrenomedullin	NM_001124	993	1272	+
159	ADSS	adenylosuccinate synthase	NM_001126	621	810	+
159	ADSS	adenylosuccinate synthase	NM_001126	1231	1380	+
159	ADSS	adenylosuccinate synthase	NM_001126	1624	1804	+
9056	SLC7A7	solute carrier family 7 (amino acid transporter light chain, y+L system), member 7	NM_001126106	561	850	+
734	OSGIN2	oxidative stress induced growth inhibitor family member 2	NM_001126111	891	1210	+
734	OSGIN2	oxidative stress induced growth inhibitor family member 2	NM_001126111	1291	1470	+
734	OSGIN2	oxidative stress induced growth inhibitor family member 2	NM_001126111	1771	1990	+
7157	TP53	tumor protein p53	NM_001126114	91	260	+
7157	TP53	tumor protein p53	NM_001126114	1411	1580	+
7157	TP53	tumor protein p53	NM_001126114	2601	2706	+
60386	SLC25A19	solute carrier family 25 (mitochondrial thiamine pyrophosphate carrier), member 19	NM_001126121	1191	1644	+
162	AP1B1	adaptor-related protein complex 1, beta 1 subunit	NM_001127	56	230	+
54872	PIGG	phosphatidylinositol glycan anchor biosynthesis, class G	NM_001127178	1891	2120	+
7555	CNBP	CCHC-type zinc finger, nucleic acid binding protein	NM_001127192	1191	1430	+
7555	CNBP	CCHC-type zinc finger, nucleic acid binding protein	NM_001127192	1511	1709	+
11322	TMC6	transmembrane channel-like 6	NM_001127198	291	470	+
11322	TMC6	transmembrane channel-like 6	NM_001127198	2741	2889	+
54790	TET2	tet methylcytosine dioxygenase 2	NM_001127208	2521	2810	+
54790	TET2	tet methylcytosine dioxygenase 2	NM_001127208	2871	2970	+
54790	TET2	tet methylcytosine dioxygenase 2	NM_001127208	3601	3810	+
54790	TET2	tet methylcytosine dioxygenase 2	NM_001127208	5011	5500	+
54790	TET2	tet methylcytosine dioxygenase 2	NM_001127208	5811	6130	+
54790	TET2	tet methylcytosine dioxygenase 2	NM_001127208	6151	6510	+
966	CD59	CD59 molecule, complement regulatory protein	NM_001127223	481	750	+
966	CD59	CD59 molecule, complement regulatory protein	NM_001127223	5041	5190	+
966	CD59	CD59 molecule, complement regulatory protein	NM_001127223	5211	5400	+
92305	TMEM129	transmembrane protein 129, E3 ubiquitin protein ligase	NM_001127266	1051	1170	+
92305	TMEM129	transmembrane protein 129, E3 ubiquitin protein ligase	NM_001127266	2531	2720	+
23468	CBX5	chromobox homolog 5	NM_001127322	301	967	+
23468	CBX5	chromobox homolog 5	NM_001127322	1491	1650	+
23468	CBX5	chromobox homolog 5	NM_001127322	3071	3320	+
23468	CBX5	chromobox homolog 5	NM_001127322	6571	6710	+
23468	CBX5	chromobox homolog 5	NM_001127322	7911	8050	+
23468	CBX5	chromobox homolog 5	NM_001127322	9601	9700	+
23468	CBX5	chromobox homolog 5	NM_001127322	10661	10950	+
23468	CBX5	chromobox homolog 5	NM_001127322	11552	11697	+
10459	MAD2L2	MAD2 mitotic arrest deficient-like 2 (yeast)	NM_001127325	791	1134	+
127544	RNF19B	ring finger protein 19B	NM_001127361	1921	2421	+
55536	CDCA7L	cell division cycle associated 7-like	NM_001127370	481	910	+
745	MYRF	myelin regulatory factor	NM_001127392	861	970	+
745	MYRF	myelin regulatory factor	NM_001127392	3834	4380	+
51646	YPEL5	yippee-like 5 (Drosophila)	NM_001127401	699	1170	+
51646	YPEL5	yippee-like 5 (Drosophila)	NM_001127401	2381	2596	+
9924	PAN2	PAN2 poly(A) specific ribonuclease subunit	NM_001127460	243	540	+
9924	PAN2	PAN2 poly(A) specific ribonuclease subunit	NM_001127460	1411	1690	+
9924	PAN2	PAN2 poly(A) specific ribonuclease subunit	NM_001127460	2751	2910	+
9924	PAN2	PAN2 poly(A) specific ribonuclease subunit	NM_001127460	3981	4510	+
51147	ING4	inhibitor of growth family, member 4	NM_001127582	141	570	+
55670	PEX26	peroxisomal biogenesis factor 26	NM_001127649	211	360	+
55670	PEX26	peroxisomal biogenesis factor 26	NM_001127649	451	610	+
55670	PEX26	peroxisomal biogenesis factor 26	NM_001127649	1231	1727	+
5476	CTSA	cathepsin A	NM_001127695	469	707	+
5476	CTSA	cathepsin A	NM_001127695	1831	2278	+
134957	STXBP5	syntaxin binding protein 5 (tomosyn)	NM_001127715	3751	3990	+
6935	ZEB1	zinc finger E-box binding homeobox 1	NM_001128128	521	630	+
6935	ZEB1	zinc finger E-box binding homeobox 1	NM_001128128	2591	2790	+
6935	ZEB1	zinc finger E-box binding homeobox 1	NM_001128128	3328	3716	+
55275	VPS53	vacuolar protein sorting 53 homolog (S. cerevisiae)	NM_001128159	2591	2840	+
56916	SMARCAD1	SWI/SNF-related, matrix-associated actin-dependent regulator of chromatin, subfamily a, containing DEAD/H box 1	NM_001128429	2288	2560	+
56916	SMARCAD1	SWI/SNF-related, matrix-associated actin-dependent regulator of chromatin, subfamily a, containing DEAD/H box 1	NM_001128429	3141	3510	+
9101	USP8	ubiquitin specific peptidase 8	NM_001128610	627	900	+
9101	USP8	ubiquitin specific peptidase 8	NM_001128610	1708	2140	+
9101	USP8	ubiquitin specific peptidase 8	NM_001128610	2691	2940	+
50650	ARHGEF3	Rho guanine nucleotide exchange factor (GEF) 3	NM_001128616	1981	2310	+
50650	ARHGEF3	Rho guanine nucleotide exchange factor (GEF) 3	NM_001128616	2526	3030	+
767558	LUZP6	leucine zipper protein 6	NM_001128619	124	440	+
767558	LUZP6	leucine zipper protein 6	NM_001128619	711	1003	+
767558	LUZP6	leucine zipper protein 6	NM_001128619	3351	3469	+
5058	PAK1	p21 protein (Cdc42/Rac)-activated kinase 1	NM_001128620	2111	2530	+
6597	SMARCA4	SWI/SNF related, matrix associated, actin dependent regulator of chromatin, subfamily a, member 4	NM_001128844	1891	2280	+
6597	SMARCA4	SWI/SNF related, matrix associated, actin dependent regulator of chromatin, subfamily a, member 4	NM_001128844	2301	2470	+
6597	SMARCA4	SWI/SNF related, matrix associated, actin dependent regulator of chromatin, subfamily a, member 4	NM_001128844	4581	4740	+
6597	SMARCA4	SWI/SNF related, matrix associated, actin dependent regulator of chromatin, subfamily a, member 4	NM_001128844	5151	5350	+
6597	SMARCA4	SWI/SNF related, matrix associated, actin dependent regulator of chromatin, subfamily a, member 4	NM_001128844	5361	5560	+
10452	TOMM40	translocase of outer mitochondrial membrane 40 homolog (yeast)	NM_001128917	1361	1793	+
4140	MARK3	MAP/microtubule affinity-regulating kinase 3	NM_001128918	2601	2943	+
3628	INPP1	inositol polyphosphate-1-phosphatase	NM_001128928	1571	1996	+
165	AEBP1	AE binding protein 1	NM_001129	3541	3650	+
165	AEBP1	AE binding protein 1	NM_001129	3701	3840	+
165	AEBP1	AE binding protein 1	NM_001129	3871	4080	+
50814	NSDHL	NAD(P) dependent steroid dehydrogenase-like	NM_001129765	1243	1617	+
1727	CYB5R3	cytochrome b5 reductase 3	NM_001129819	1591	1800	+
55634	KRBOX4	KRAB box domain containing 4	NM_001129899	661	880	+
55634	KRBOX4	KRAB box domain containing 4	NM_001129899	921	1090	+
55634	KRBOX4	KRAB box domain containing 4	NM_001129899	1111	1270	+
87	ACTN1	actinin, alpha 1	NM_001130004	151	350	+
87	ACTN1	actinin, alpha 1	NM_001130004	3061	3272	+
2935	GSPT1	G1 to S phase transition 1	NM_001130007	731	940	+
2935	GSPT1	G1 to S phase transition 1	NM_001130007	961	1190	+
2935	GSPT1	G1 to S phase transition 1	NM_001130007	1231	1443	+
2935	GSPT1	G1 to S phase transition 1	NM_001130007	5411	5550	+
348654	GEN1	GEN1 Holliday junction 5' flap endonuclease	NM_001130009	1831	2020	+
348654	GEN1	GEN1 Holliday junction 5' flap endonuclease	NM_001130009	2281	2540	+
348654	GEN1	GEN1 Holliday junction 5' flap endonuclease	NM_001130009	2621	2900	+
348654	GEN1	GEN1 Holliday junction 5' flap endonuclease	NM_001130009	4881	5250	+
535	ATP6V0A1	ATPase, H+ transporting, lysosomal V0 subunit a1	NM_001130020	34	210	+
535	ATP6V0A1	ATPase, H+ transporting, lysosomal V0 subunit a1	NM_001130020	2871	3108	+
535	ATP6V0A1	ATPase, H+ transporting, lysosomal V0 subunit a1	NM_001130020	3221	3410	+
535	ATP6V0A1	ATPase, H+ transporting, lysosomal V0 subunit a1	NM_001130020	3851	4030	+
1198	CLK3	CDC-like kinase 3	NM_001130028	2373	2562	+
54811	ZNF562	zinc finger protein 562	NM_001130031	557	750	+
54811	ZNF562	zinc finger protein 562	NM_001130031	891	1080	+
1429	CRYZ	crystallin, zeta (quinone reductase)	NM_001130042	981	1300	+
4650	MYO9B	myosin IXB	NM_001130065	191	420	+
4650	MYO9B	myosin IXB	NM_001130065	3851	4050	+
4650	MYO9B	myosin IXB	NM_001130065	6471	6960	+
4650	MYO9B	myosin IXB	NM_001130065	7146	7612	+
3735	KARS	lysyl-tRNA synthetase	NM_001130089	239	420	+
3735	KARS	lysyl-tRNA synthetase	NM_001130089	471	680	+
10087	COL4A3BP	collagen, type IV, alpha 3 (Goodpasture antigen) binding protein	NM_001130105	335	620	+
10087	COL4A3BP	collagen, type IV, alpha 3 (Goodpasture antigen) binding protein	NM_001130105	1264	1510	+
10087	COL4A3BP	collagen, type IV, alpha 3 (Goodpasture antigen) binding protein	NM_001130105	1711	1862	+
10087	COL4A3BP	collagen, type IV, alpha 3 (Goodpasture antigen) binding protein	NM_001130105	4936	5094	+
6709	SPTAN1	spectrin, alpha, non-erythrocytic 1	NM_001130438	3361	3470	+
6709	SPTAN1	spectrin, alpha, non-erythrocytic 1	NM_001130438	3541	3690	+
6709	SPTAN1	spectrin, alpha, non-erythrocytic 1	NM_001130438	4501	4640	+
6709	SPTAN1	spectrin, alpha, non-erythrocytic 1	NM_001130438	7791	7900	+
6726	SRP9	signal recognition particle 9kDa	NM_001130440	461	610	+
6744	SSFA2	sperm specific antigen 2	NM_001130445	1461	1730	+
6744	SSFA2	sperm specific antigen 2	NM_001130445	2121	2610	+
6744	SSFA2	sperm specific antigen 2	NM_001130445	2761	3150	+
6744	SSFA2	sperm specific antigen 2	NM_001130445	3691	3890	+
8907	AP1M1	adaptor-related protein complex 1, mu 1 subunit	NM_001130524	1551	1670	+
9043	SPAG9	sperm associated antigen 9	NM_001130528	481	810	+
9043	SPAG9	sperm associated antigen 9	NM_001130528	1471	1820	+
100170841	C17orf96	chromosome 17 open reading frame 96	NM_001130677	1531	1720	+
1977	EIF4E	eukaryotic translation initiation factor 4E	NM_001130679	1517	1700	+
1977	EIF4E	eukaryotic translation initiation factor 4E	NM_001130679	2091	2363	+
26034	IPCEF1	interaction protein for cytohesin exchange factors 1	NM_001130699	351	510	+
26034	IPCEF1	interaction protein for cytohesin exchange factors 1	NM_001130699	681	1160	+
26034	IPCEF1	interaction protein for cytohesin exchange factors 1	NM_001130699	1281	1700	+
26034	IPCEF1	interaction protein for cytohesin exchange factors 1	NM_001130699	1885	2211	+
26034	IPCEF1	interaction protein for cytohesin exchange factors 1	NM_001130699	2212	2473	+
26034	IPCEF1	interaction protein for cytohesin exchange factors 1	NM_001130699	3231	3360	+
1786	DNMT1	DNA (cytosine-5-)-methyltransferase 1	NM_001130823	791	1280	+
1786	DNMT1	DNA (cytosine-5-)-methyltransferase 1	NM_001130823	1961	2120	+
1786	DNMT1	DNA (cytosine-5-)-methyltransferase 1	NM_001130823	2211	2481	+
1786	DNMT1	DNA (cytosine-5-)-methyltransferase 1	NM_001130823	3871	4040	+
8634	RTCA	RNA 3'-terminal phosphate cyclase	NM_001130841	361	550	+
8634	RTCA	RNA 3'-terminal phosphate cyclase	NM_001130841	1181	1380	+
51719	CAB39	calcium binding protein 39	NM_001130849	422	860	+
51719	CAB39	calcium binding protein 39	NM_001130849	1511	1680	+
51719	CAB39	calcium binding protein 39	NM_001130849	1757	1962	+
10635	RAD51AP1	RAD51 associated protein 1	NM_001130862	221	368	+
10635	RAD51AP1	RAD51 associated protein 1	NM_001130862	641	920	+
10910	SUGT1	SGT1, suppressor of G2 allele of SKP1 (S. cerevisiae)	NM_001130912	882	1100	+
124411	ZNF720	zinc finger protein 720	NM_001130913	491	640	+
647087	C7orf73	chromosome 7 open reading frame 73	NM_001130929	86	526	+
23370	ARHGEF18	Rho/Rac guanine nucleotide exchange factor (GEF) 18	NM_001130955	2871	3030	+
23370	ARHGEF18	Rho/Rac guanine nucleotide exchange factor (GEF) 18	NM_001130955	4431	4610	+
23306	TMEM194A	transmembrane protein 194A	NM_001130963	1111	1440	+
23306	TMEM194A	transmembrane protein 194A	NM_001130963	1676	1860	+
23306	TMEM194A	transmembrane protein 194A	NM_001130963	4091	4270	+
23306	TMEM194A	transmembrane protein 194A	NM_001130963	4691	4810	+
23353	SUN1	Sad1 and UNC84 domain containing 1	NM_001130965	2318	2626	+
26012	NSMF	NMDA receptor synaptonuclear signaling and neuronal migration factor	NM_001130969	1811	2020	+
23240	KIAA0922	KIAA0922	NM_001131007	3232	3462	+
23240	KIAA0922	KIAA0922	NM_001131007	4541	4980	+
5830	PEX5	peroxisomal biogenesis factor 5	NM_001131025	2351	2520	+
3631	INPP4A	inositol polyphosphate-4-phosphatase, type I, 107kDa	NM_001134224	3181	3404	+
3631	INPP4A	inositol polyphosphate-4-phosphatase, type I, 107kDa	NM_001134224	4711	4940	+
3631	INPP4A	inositol polyphosphate-4-phosphatase, type I, 107kDa	NM_001134224	5902	6280	+
10947	AP3M2	adaptor-related protein complex 3, mu 2 subunit	NM_001134296	1647	1840	+
10947	AP3M2	adaptor-related protein complex 3, mu 2 subunit	NM_001134296	1896	2280	+
9922	IQSEC1	IQ motif and Sec7 domain 1	NM_001134382	993	1500	+
9922	IQSEC1	IQ motif and Sec7 domain 1	NM_001134382	4591	4750	+
9922	IQSEC1	IQ motif and Sec7 domain 1	NM_001134382	4971	5240	+
9922	IQSEC1	IQ motif and Sec7 domain 1	NM_001134382	5271	5490	+
55146	ZDHHC4	zinc finger, DHHC-type containing 4	NM_001134387	1281	1540	+
7410	VAV2	vav 2 guanine nucleotide exchange factor	NM_001134398	1081	1270	+
7410	VAV2	vav 2 guanine nucleotide exchange factor	NM_001134398	3061	3210	+
7410	VAV2	vav 2 guanine nucleotide exchange factor	NM_001134398	4095	4280	+
284613	CYB561D1	cytochrome b561 family, member D1	NM_001134404	841	1020	+
284613	CYB561D1	cytochrome b561 family, member D1	NM_001134404	1121	1220	+
8317	CDC7	cell division cycle 7	NM_001134420	901	1088	+
8317	CDC7	cell division cycle 7	NM_001134420	1543	1940	+
55573	CDV3	CDV3 homolog (mouse)	NM_001134422	597	750	+
55573	CDV3	CDV3 homolog (mouse)	NM_001134422	1851	2460	+
55144	LRRC8D	leucine rich repeat containing 8 family, member D	NM_001134479	2591	2850	+
401505	TOMM5	translocase of outer mitochondrial membrane 5 homolog (yeast)	NM_001134484	391	634	+
100128731	OST4	oligosaccharyltransferase 4 homolog (S. cerevisiae)	NM_001134693	291	464	+
51194	IPO11	importin 11	NM_001134779	3171	3360	+
6932	TCF7	transcription factor 7 (T-cell specific, HMG-box)	NM_001134851	1341	1660	+
283643	C14orf80	chromosome 14 open reading frame 80	NM_001134875	1211	1410	+
283643	C14orf80	chromosome 14 open reading frame 80	NM_001134875	1461	1682	+
1690	COCH	cochlin	NM_001135058	1401	1830	+
23516	SLC39A14	solute carrier family 39 (zinc transporter), member 14	NM_001135153	1669	2000	+
23516	SLC39A14	solute carrier family 39 (zinc transporter), member 14	NM_001135153	2041	2210	+
84307	ZNF397	zinc finger protein 397	NM_001135178	271	580	+
84307	ZNF397	zinc finger protein 397	NM_001135178	2081	2280	+
3267	AGFG1	ArfGAP with FG repeats 1	NM_001135187	671	780	+
3267	AGFG1	ArfGAP with FG repeats 1	NM_001135187	1691	2224	+
10397	NDRG1	N-myc downstream regulated 1	NM_001135242	1541	2230	+
10397	NDRG1	N-myc downstream regulated 1	NM_001135242	2271	2380	+
6949	TCOF1	Treacher Collins-Franceschetti syndrome 1	NM_001135243	811	992	+
6949	TCOF1	Treacher Collins-Franceschetti syndrome 1	NM_001135243	3991	4590	+
6949	TCOF1	Treacher Collins-Franceschetti syndrome 1	NM_001135243	4791	4930	+
8226	HDHD1	haloacid dehalogenase-like hydrolase domain containing 1	NM_001135565	913	1131	+
728568	C12orf73	chromosome 12 open reading frame 73	NM_001135570	231	380	+
221710	SMIM13	small integral membrane protein 13	NM_001135575	431	580	+
221710	SMIM13	small integral membrane protein 13	NM_001135575	1351	1633	+
134553	C5orf24	chromosome 5 open reading frame 24	NM_001135586	281	722	+
55704	CCDC88A	coiled-coil domain containing 88A	NM_001135597	3041	3640	+
55704	CCDC88A	coiled-coil domain containing 88A	NM_001135597	3761	4010	+
55704	CCDC88A	coiled-coil domain containing 88A	NM_001135597	4421	4550	+
55704	CCDC88A	coiled-coil domain containing 88A	NM_001135597	5956	6443	+
55704	CCDC88A	coiled-coil domain containing 88A	NM_001135597	6651	6810	+
129285	PPP1R21	protein phosphatase 1, regulatory subunit 21	NM_001135629	1871	2030	+
129285	PPP1R21	protein phosphatase 1, regulatory subunit 21	NM_001135629	2341	2519	+
8394	PIP5K1A	phosphatidylinositol-4-phosphate 5-kinase, type I, alpha	NM_001135638	91	260	+
8394	PIP5K1A	phosphatidylinositol-4-phosphate 5-kinase, type I, alpha	NM_001135638	301	490	+
8394	PIP5K1A	phosphatidylinositol-4-phosphate 5-kinase, type I, alpha	NM_001135638	1081	1329	+
8394	PIP5K1A	phosphatidylinositol-4-phosphate 5-kinase, type I, alpha	NM_001135638	2345	2595	+
51164	DCTN4	dynactin 4 (p62)	NM_001135644	461	610	+
51164	DCTN4	dynactin 4 (p62)	NM_001135644	1452	1870	+
51307	FAM53C	family with sequence similarity 53, member C	NM_001135647	298	493	+
51307	FAM53C	family with sequence similarity 53, member C	NM_001135647	680	1174	+
51307	FAM53C	family with sequence similarity 53, member C	NM_001135647	1505	1950	+
8761	PABPC4	poly(A) binding protein, cytoplasmic 4 (inducible form)	NM_001135653	111	240	+
8761	PABPC4	poly(A) binding protein, cytoplasmic 4 (inducible form)	NM_001135653	611	810	+
8761	PABPC4	poly(A) binding protein, cytoplasmic 4 (inducible form)	NM_001135653	1540	1831	+
8761	PABPC4	poly(A) binding protein, cytoplasmic 4 (inducible form)	NM_001135653	2801	2980	+
8934	RAB29	RAB29, member RAS oncogene family	NM_001135663	1091	1220	+
8934	RAB29	RAB29, member RAS oncogene family	NM_001135663	1764	2031	+
7419	VDAC3	voltage-dependent anion channel 3	NM_001135694	1011	1260	+
94241	TP53INP1	tumor protein p53 inducible nuclear protein 1	NM_001135733	639	1134	+
94241	TP53INP1	tumor protein p53 inducible nuclear protein 1	NM_001135733	34	638	+
94241	TP53INP1	tumor protein p53 inducible nuclear protein 1	NM_001135733	5241	5432	+
171017	ZNF384	zinc finger protein 384	NM_001135734	2141	2370	+
11319	ECD	ecdysoneless homolog (Drosophila)	NM_001135752	1951	2284	+
58516	FAM60A	family with sequence similarity 60, member A	NM_001135811	27	210	+
58516	FAM60A	family with sequence similarity 60, member A	NM_001135811	481	780	+
58516	FAM60A	family with sequence similarity 60, member A	NM_001135811	841	1070	+
125488	TTC39C	tetratricopeptide repeat domain 39C	NM_001135993	2141	2240	+
2618	GART	phosphoribosylglycinamide formyltransferase, phosphoribosylglycinamide synthetase, phosphoribosylaminoimidazole synthetase	NM_001136005_2	1385	1560	+
2618	GART	phosphoribosylglycinamide formyltransferase, phosphoribosylglycinamide synthetase, phosphoribosylaminoimidazole synthetase	NM_001136005_2	2551	2770	+
2618	GART	phosphoribosylglycinamide formyltransferase, phosphoribosylglycinamide synthetase, phosphoribosylaminoimidazole synthetase	NM_001136005_2	3181	3503	+
4776	NFATC4	nuclear factor of activated T-cells, cytoplasmic, calcineurin-dependent 4	NM_001136022	1231	1370	+
4776	NFATC4	nuclear factor of activated T-cells, cytoplasmic, calcineurin-dependent 4	NM_001136022	3981	4130	+
6396	SEC13	SEC13 homolog (S. cerevisiae)	NM_001136026	1231	1420	+
9840	TESPA1	thymocyte expressed, positive selection associated 1	NM_001136030	1051	1231	+
9840	TESPA1	thymocyte expressed, positive selection associated 1	NM_001136030	1291	1550	+
9840	TESPA1	thymocyte expressed, positive selection associated 1	NM_001136030	1861	2030	+
22827	PUF60	poly-U binding splicing factor 60KDa	NM_001136033	1621	1900	+
55657	ZNF692	zinc finger protein 692	NM_001136036	1941	2179	+
81556	VWA9	von Willebrand factor A domain containing 9	NM_001136043	1528	2223	+
131601	TPRA1	transmembrane protein, adipocyte asscociated 1	NM_001136053	1427	1670	+
203069	R3HCC1	R3H domain and coiled-coil containing 1	NM_001136108	491	980	+
10585	POMT1	protein-O-mannosyltransferase 1	NM_001136113	2458	2790	+
6158	RPL28	ribosomal protein L28	NM_001136134	548	687	+
22847	ZNF507	zinc finger protein 507	NM_001136156	1491	1720	+
22847	ZNF507	zinc finger protein 507	NM_001136156	2808	2974	+
22847	ZNF507	zinc finger protein 507	NM_001136156	3061	3180	+
440498	HSBP1L1	heat shock factor binding protein 1-like 1	NM_001136180	501	706	+
22868	FASTKD2	FAST kinase domains 2	NM_001136194	421	636	+
22868	FASTKD2	FAST kinase domains 2	NM_001136194	871	1160	+
30000	TNPO2	transportin 2	NM_001136195	351	490	+
30000	TNPO2	transportin 2	NM_001136195	4848	5065	+
2212	FCGR2A	Fc fragment of IgG, low affinity IIa, receptor (CD32)	NM_001136219	1031	1130	+
55758	RCOR3	REST corepressor 3	NM_001136223	221	390	+
55758	RCOR3	REST corepressor 3	NM_001136223	741	960	+
55758	RCOR3	REST corepressor 3	NM_001136223	1293	2064	+
552889	ATXN7L3B	ataxin 7-like 3B	NM_001136262	121	320	+
552889	ATXN7L3B	ataxin 7-like 3B	NM_001136262	591	750	+
552889	ATXN7L3B	ataxin 7-like 3B	NM_001136262	967	1210	+
552889	ATXN7L3B	ataxin 7-like 3B	NM_001136262	1251	1390	+
552889	ATXN7L3B	ataxin 7-like 3B	NM_001136262	1538	1737	+
84879	MFSD2A	major facilitator superfamily domain containing 2A	NM_001136493	1931	2110	+
284371	ZNF841	zinc finger protein 841	NM_001136499	771	920	+
80724	ACAD10	acyl-CoA dehydrogenase family, member 10	NM_001136538	2271	2530	+
80724	ACAD10	acyl-CoA dehydrogenase family, member 10	NM_001136538	3521	4098	+
57720	GPR107	G protein-coupled receptor 107	NM_001136557	691	810	+
57720	GPR107	G protein-coupled receptor 107	NM_001136557	1951	2248	+
57720	GPR107	G protein-coupled receptor 107	NM_001136557	2366	2643	+
57720	GPR107	G protein-coupled receptor 107	NM_001136557	4061	4460	+
57720	GPR107	G protein-coupled receptor 107	NM_001136557	5301	5450	+
9208	LRRFIP1	leucine rich repeat (in FLII) interacting protein 1	NM_001137552	1231	1420	+
9208	LRRFIP1	leucine rich repeat (in FLII) interacting protein 1	NM_001137552	1671	2270	+
9208	LRRFIP1	leucine rich repeat (in FLII) interacting protein 1	NM_001137552	2411	2780	+
342371	ATXN1L	ataxin 1-like	NM_001137675	131	710	+
342371	ATXN1L	ataxin 1-like	NM_001137675	1021	2340	+
10134	BCAP31	B-cell receptor-associated protein 31	NM_001139457	1047	1280	+
10134	BCAP31	B-cell receptor-associated protein 31	NM_001139457	1411	1576	+
25780	RASGRP3	RAS guanyl releasing protein 3 (calcium and DAG-regulated)	NM_001139488	341	530	+
25780	RASGRP3	RAS guanyl releasing protein 3 (calcium and DAG-regulated)	NM_001139488	1622	1860	+
25780	RASGRP3	RAS guanyl releasing protein 3 (calcium and DAG-regulated)	NM_001139488	2513	3085	+
8575	PRKRA	protein kinase, interferon-inducible double stranded RNA dependent activator	NM_001139517	314	433	+
8575	PRKRA	protein kinase, interferon-inducible double stranded RNA dependent activator	NM_001139517	1171	1290	+
59	ACTA2	actin, alpha 2, smooth muscle, aorta	NM_001141945	281	510	+
79621	RNASEH2B	ribonuclease H2, subunit B	NM_001142279	1151	1380	+
6229	RPS24	ribosomal protein S24	NM_001142285	361	535	+
79677	SMC6	structural maintenance of chromosomes 6	NM_001142286	941	1080	+
79677	SMC6	structural maintenance of chromosomes 6	NM_001142286	1121	1710	+
79677	SMC6	structural maintenance of chromosomes 6	NM_001142286	2451	3060	+
79677	SMC6	structural maintenance of chromosomes 6	NM_001142286	3511	3739	+
23295	MGRN1	mahogunin ring finger 1, E3 ubiquitin protein ligase	NM_001142290	1161	1310	+
23295	MGRN1	mahogunin ring finger 1, E3 ubiquitin protein ligase	NM_001142290	1391	1560	+
23295	MGRN1	mahogunin ring finger 1, E3 ubiquitin protein ligase	NM_001142290	4301	4900	+
23295	MGRN1	mahogunin ring finger 1, E3 ubiquitin protein ligase	NM_001142290	5931	6130	+
23295	MGRN1	mahogunin ring finger 1, E3 ubiquitin protein ligase	NM_001142290	6141	6302	+
81562	LMAN2L	lectin, mannose-binding 2-like	NM_001142292	1121	1340	+
81562	LMAN2L	lectin, mannose-binding 2-like	NM_001142292	2331	2430	+
8878	SQSTM1	sequestosome 1	NM_001142298	851	1170	+
151195	CCNYL1	cyclin Y-like 1	NM_001142300	1281	1610	+
2965	GTF2H1	general transcription factor IIH, polypeptide 1, 62kDa	NM_001142307	2371	2586	+
2965	GTF2H1	general transcription factor IIH, polypeptide 1, 62kDa	NM_001142307	2811	2920	+
5532	PPP3CB	protein phosphatase 3, catalytic subunit, beta isozyme	NM_001142353	201	420	+
5532	PPP3CB	protein phosphatase 3, catalytic subunit, beta isozyme	NM_001142353	1584	2002	+
5532	PPP3CB	protein phosphatase 3, catalytic subunit, beta isozyme	NM_001142353	2951	3148	+
5165	PDK3	pyruvate dehydrogenase kinase, isozyme 3	NM_001142386	1333	2084	+
5165	PDK3	pyruvate dehydrogenase kinase, isozyme 3	NM_001142386	8031	8300	+
5165	PDK3	pyruvate dehydrogenase kinase, isozyme 3	NM_001142386	12131	12230	+
5165	PDK3	pyruvate dehydrogenase kinase, isozyme 3	NM_001142386	12581	12759	+
4739	NEDD9	neural precursor cell expressed, developmentally down-regulated 9	NM_001142393	1041	1390	+
4739	NEDD9	neural precursor cell expressed, developmentally down-regulated 9	NM_001142393	2001	2320	+
4739	NEDD9	neural precursor cell expressed, developmentally down-regulated 9	NM_001142393	2521	2912	+
9643	MORF4L2	mortality factor 4 like 2	NM_001142418	651	1091	+
80153	EDC3	enhancer of mRNA decapping 3	NM_001142443	991	1210	+
80153	EDC3	enhancer of mRNA decapping 3	NM_001142443	1731	1930	+
80153	EDC3	enhancer of mRNA decapping 3	NM_001142443	1991	2290	+
286	ANK1	ankyrin 1, erythrocytic	NM_001142446	3392	3568	+
286	ANK1	ankyrin 1, erythrocytic	NM_001142446	5111	5900	+
286	ANK1	ankyrin 1, erythrocytic	NM_001142446	5971	6300	+
9315	NREP	neuronal regeneration related protein	NM_001142483	641	1089	+
63901	FAM111A	family with sequence similarity 111, member A	NM_001142520	641	790	+
63901	FAM111A	family with sequence similarity 111, member A	NM_001142520	881	1210	+
63901	FAM111A	family with sequence similarity 111, member A	NM_001142520	1421	1580	+
63901	FAM111A	family with sequence similarity 111, member A	NM_001142520	1651	1830	+
26271	FBXO5	F-box protein 5	NM_001142522	521	730	+
56987	BBX	bobby sox homolog (Drosophila)	NM_001142568	1220	1490	+
56987	BBX	bobby sox homolog (Drosophila)	NM_001142568	1661	2250	+
56987	BBX	bobby sox homolog (Drosophila)	NM_001142568	2331	2480	+
56987	BBX	bobby sox homolog (Drosophila)	NM_001142568	2861	2990	+
56987	BBX	bobby sox homolog (Drosophila)	NM_001142568	3181	3350	+
56987	BBX	bobby sox homolog (Drosophila)	NM_001142568	6861	7110	+
56987	BBX	bobby sox homolog (Drosophila)	NM_001142568	7351	7460	+
55765	C1orf106	chromosome 1 open reading frame 106	NM_001142569	1761	2000	+
55765	C1orf106	chromosome 1 open reading frame 106	NM_001142569	2021	2460	+
55765	C1orf106	chromosome 1 open reading frame 106	NM_001142569	3560	3810	+
5892	RAD51D	RAD51 paralog D	NM_001142571	1381	1570	+
284323	ZNF780A	zinc finger protein 780A	NM_001142579	491	612	+
4802	NFYC	nuclear transcription factor Y, gamma	NM_001142590	1481	1768	+
5033	P4HA1	prolyl 4-hydroxylase, alpha polypeptide I	NM_001142595	471	650	+
5033	P4HA1	prolyl 4-hydroxylase, alpha polypeptide I	NM_001142595	1036	1280	+
5033	P4HA1	prolyl 4-hydroxylase, alpha polypeptide I	NM_001142595	1511	1720	+
100131211	TMEM194B	transmembrane protein 194B	NM_001142645	1321	1520	+
56681	SAR1A	secretion associated, Ras related GTPase 1A	NM_001142648	18	170	+
56681	SAR1A	secretion associated, Ras related GTPase 1A	NM_001142648	650	852	+
56681	SAR1A	secretion associated, Ras related GTPase 1A	NM_001142648	853	1154	+
112479	ERI2	ERI1 exoribonuclease family member 2	NM_001142725	1241	1390	+
112479	ERI2	ERI1 exoribonuclease family member 2	NM_001142725	1761	2100	+
90417	KNSTRN	kinetochore-localized astrin/SPAG5 binding protein	NM_001142761	1431	1660	+
124944	C17orf49	chromosome 17 open reading frame 49	NM_001142798	781	881	+
9780	PIEZO1	piezo-type mechanosensitive ion channel component 1	NM_001142864	3861	4220	+
9780	PIEZO1	piezo-type mechanosensitive ion channel component 1	NM_001142864	4311	4660	+
9780	PIEZO1	piezo-type mechanosensitive ion channel component 1	NM_001142864	4711	4850	+
9780	PIEZO1	piezo-type mechanosensitive ion channel component 1	NM_001142864	5412	5820	+
9780	PIEZO1	piezo-type mechanosensitive ion channel component 1	NM_001142864	7501	7785	+
8539	API5	apoptosis inhibitor 5	NM_001142930	711	810	+
8539	API5	apoptosis inhibitor 5	NM_001142930	1571	1935	+
8539	API5	apoptosis inhibitor 5	NM_001142930	3211	3457	+
115752	DIS3L	DIS3 like exosome 3'-5' exoribonuclease	NM_001143688	1711	2150	+
115752	DIS3L	DIS3 like exosome 3'-5' exoribonuclease	NM_001143688	2951	3240	+
51629	SLC25A39	solute carrier family 25, member 39	NM_001143780	1431	1597	+
53373	TPCN1	two pore segment channel 1	NM_001143819	2711	3130	+
53373	TPCN1	two pore segment channel 1	NM_001143819	3211	3450	+
53373	TPCN1	two pore segment channel 1	NM_001143819	5111	5350	+
7541	ZBTB14	zinc finger and BTB domain containing 14	NM_001143823	1691	1976	+
10982	MAPRE2	microtubule-associated protein, RP/EB family, member 2	NM_001143827	831	950	+
10982	MAPRE2	microtubule-associated protein, RP/EB family, member 2	NM_001143827	1111	1500	+
2620	GAS2	growth arrest-specific 2	NM_001143830	1131	1340	+
4798	NFRKB	nuclear factor related to kappaB binding protein	NM_001143835	2351	2450	+
4798	NFRKB	nuclear factor related to kappaB binding protein	NM_001143835	3311	3720	+
4798	NFRKB	nuclear factor related to kappaB binding protein	NM_001143835	4111	4280	+
79022	TMEM106C	transmembrane protein 106C	NM_001143842	991	1160	+
9318	COPS2	COP9 signalosome subunit 2	NM_001143887	181	370	+
9318	COPS2	COP9 signalosome subunit 2	NM_001143887	1277	1810	+
10906	TRAFD1	TRAF-type zinc finger domain containing 1	NM_001143906	871	1430	+
145853	C15orf61	chromosome 15 open reading frame 61	NM_001143936	351	550	+
81491	GPR63	G protein-coupled receptor 63	NM_001143957	381	630	+
81491	GPR63	G protein-coupled receptor 63	NM_001143957	1283	1858	+
54820	NDE1	nudE neurodevelopment protein 1	NM_001143979	2081	2280	+
54820	NDE1	nudE neurodevelopment protein 1	NM_001143979	2421	2580	+
8045	RASSF7	Ras association (RalGDS/AF-6) domain family (N-terminal) member 7	NM_001143993	601	740	+
8045	RASSF7	Ras association (RalGDS/AF-6) domain family (N-terminal) member 7	NM_001143993	1461	1700	+
267	AMFR	autocrine motility factor receptor, E3 ubiquitin protein ligase	NM_001144	2141	2490	+
27158	NDOR1	NADPH dependent diflavin oxidoreductase 1	NM_001144026	2851	3020	+
27158	NDOR1	NADPH dependent diflavin oxidoreductase 1	NM_001144026	3251	3830	+
27158	NDOR1	NADPH dependent diflavin oxidoreductase 1	NM_001144026	4011	4500	+
27158	NDOR1	NADPH dependent diflavin oxidoreductase 1	NM_001144026	4511	4650	+
27158	NDOR1	NADPH dependent diflavin oxidoreductase 1	NM_001144026	4681	4870	+
667	DST	dystonin	NM_001144769	4201	4300	+
667	DST	dystonin	NM_001144769	5631	5770	+
667	DST	dystonin	NM_001144769	8411	8720	+
667	DST	dystonin	NM_001144769	9581	9810	+
667	DST	dystonin	NM_001144769	10001	10260	+
667	DST	dystonin	NM_001144769	16791	17110	+
965	CD58	CD58 molecule	NM_001144822	511	720	+
10260	DENND4A	DENN/MADD domain containing 4A	NM_001144823	3162	3330	+
10260	DENND4A	DENN/MADD domain containing 4A	NM_001144823	3457	4245	+
10260	DENND4A	DENN/MADD domain containing 4A	NM_001144823	5711	6020	+
4599	MX1	MX dynamin-like GTPase 1	NM_001144925	2941	3180	+
28511	NKIRAS2	NFKB inhibitor interacting Ras-like 2	NM_001144927	32	190	+
28511	NKIRAS2	NFKB inhibitor interacting Ras-like 2	NM_001144927	811	1010	+
28511	NKIRAS2	NFKB inhibitor interacting Ras-like 2	NM_001144927	1561	1700	+
5693	PSMB5	proteasome (prosome, macropain) subunit, beta type, 5	NM_001144932	291	390	+
5693	PSMB5	proteasome (prosome, macropain) subunit, beta type, 5	NM_001144932	1051	1310	+
23327	NEDD4L	neural precursor cell expressed, developmentally down-regulated 4-like, E3 ubiquitin protein ligase	NM_001144967	3211	3497	+
10783	NEK6	NIMA-related kinase 6	NM_001145001	1401	1610	+
10783	NEK6	NIMA-related kinase 6	NM_001145001	2071	2400	+
11119	BTN3A1	butyrophilin, subfamily 3, member A1	NM_001145009	1711	1860	+
11119	BTN3A1	butyrophilin, subfamily 3, member A1	NM_001145009	2291	2620	+
11119	BTN3A1	butyrophilin, subfamily 3, member A1	NM_001145009	3421	3620	+
83475	DOHH	deoxyhypusine hydroxylase/monooxygenase	NM_001145165	1171	1500	+
729993	SHISA9	shisa family member 9	NM_001145204	5217	5350	+
8031	NCOA4	nuclear receptor coactivator 4	NM_001145260	1246	1885	+
23265	EXOC7	exocyst complex component 7	NM_001145297	2271	2490	+
23265	EXOC7	exocyst complex component 7	NM_001145297	2621	2840	+
23265	EXOC7	exocyst complex component 7	NM_001145297	4351	4450	+
23265	EXOC7	exocyst complex component 7	NM_001145297	4571	4901	+
1021	CDK6	cyclin-dependent kinase 6	NM_001145306	426	768	+
1021	CDK6	cyclin-dependent kinase 6	NM_001145306	84	425	+
1021	CDK6	cyclin-dependent kinase 6	NM_001145306	1296	1670	+
1021	CDK6	cyclin-dependent kinase 6	NM_001145306	2001	2140	+
1021	CDK6	cyclin-dependent kinase 6	NM_001145306	7501	7670	+
83856	FSD1L	fibronectin type III and SPRY domain containing 1-like	NM_001145313	841	990	+
83856	FSD1L	fibronectin type III and SPRY domain containing 1-like	NM_001145313	1097	1310	+
79980	DSN1	DSN1, MIS12 kinetochore complex component	NM_001145316	251	350	+
79980	DSN1	DSN1, MIS12 kinetochore complex component	NM_001145316	1411	1590	+
79831	KDM8	lysine (K)-specific demethylase 8	NM_001145348	1621	1780	+
4289	MKLN1	muskelin 1, intracellular mediator containing kelch motifs	NM_001145354	1661	1760	+
4289	MKLN1	muskelin 1, intracellular mediator containing kelch motifs	NM_001145354	2261	2544	+
4289	MKLN1	muskelin 1, intracellular mediator containing kelch motifs	NM_001145354	10461	10700	+
55871	CBWD1	COBW domain containing 1	NM_001145355	61	190	+
25942	SIN3A	SIN3 transcription regulator family member A	NM_001145358	4398	4728	+
25942	SIN3A	SIN3 transcription regulator family member A	NM_001145358	3941	4392	+
25942	SIN3A	SIN3 transcription regulator family member A	NM_001145358	4831	4948	+
22834	ZNF652	zinc finger protein 652	NM_001145365	444	1367	+
22834	ZNF652	zinc finger protein 652	NM_001145365	1891	2620	+
22834	ZNF652	zinc finger protein 652	NM_001145365	10981	11140	+
4841	NONO	non-POU domain containing, octamer-binding	NM_001145408	698	930	+
4841	NONO	non-POU domain containing, octamer-binding	NM_001145408	1561	1880	+
9869	SETDB1	SET domain, bifurcated 1	NM_001145415	1961	2280	+
9869	SETDB1	SET domain, bifurcated 1	NM_001145415	2811	3123	+
4047	LSS	lanosterol synthase (2,3-oxidosqualene-lanosterol cyclase)	NM_001145437_2	2801	2920	+
4047	LSS	lanosterol synthase (2,3-oxidosqualene-lanosterol cyclase)	NM_001145437_2	3191	3370	+
4047	LSS	lanosterol synthase (2,3-oxidosqualene-lanosterol cyclase)	NM_001145437_2	3931	4160	+
4047	LSS	lanosterol synthase (2,3-oxidosqualene-lanosterol cyclase)	NM_001145437_2	4191	4310	+
441250	TYW1B	tRNA-yW synthesizing protein 1 homolog B (S. cerevisiae)	NM_001145440	2111	2410	+
641455	POTEM	POTE ankyrin domain family, member M	NM_001145442	2757	2867	+
9805	SCRN1	secernin 1	NM_001145513	381	650	+
9805	SCRN1	secernin 1	NM_001145513	1247	1533	+
9805	SCRN1	secernin 1	NM_001145513	2461	2650	+
9805	SCRN1	secernin 1	NM_001145513	4161	4400	+
9805	SCRN1	secernin 1	NM_001145513	5171	5270	+
125061	AFMID	arylformamidase	NM_001145526	1057	1310	+
84991	RBM17	RNA binding motif protein 17	NM_001145547	1811	1993	+
55625	ZDHHC7	zinc finger, DHHC-type containing 7	NM_001145548	1321	1480	+
55625	ZDHHC7	zinc finger, DHHC-type containing 7	NM_001145548	1531	1700	+
55625	ZDHHC7	zinc finger, DHHC-type containing 7	NM_001145548	1731	1830	+
55625	ZDHHC7	zinc finger, DHHC-type containing 7	NM_001145548	2808	3084	+
9711	KIAA0226	KIAA0226	NM_001145642	401	500	+
9711	KIAA0226	KIAA0226	NM_001145642	1111	1420	+
9711	KIAA0226	KIAA0226	NM_001145642	3221	3400	+
9711	KIAA0226	KIAA0226	NM_001145642	3741	4111	+
57711	ZNF529	zinc finger protein 529	NM_001145649	547	987	+
57711	ZNF529	zinc finger protein 529	NM_001145649	1042	1750	+
2734	GLG1	golgi glycoprotein 1	NM_001145667	2011	2220	+
2734	GLG1	golgi glycoprotein 1	NM_001145667	2531	2890	+
2734	GLG1	golgi glycoprotein 1	NM_001145667	3953	4795	+
2734	GLG1	golgi glycoprotein 1	NM_001145667	3444	3942	+
2734	GLG1	golgi glycoprotein 1	NM_001145667	6781	6880	+
2289	FKBP5	FK506 binding protein 5	NM_001145777	21	170	+
2289	FKBP5	FK506 binding protein 5	NM_001145777	251	350	+
3684	ITGAM	integrin, alpha M (complement component 3 receptor 3 subunit)	NM_001145808	1971	2170	+
3684	ITGAM	integrin, alpha M (complement component 3 receptor 3 subunit)	NM_001145808	3521	3680	+
3684	ITGAM	integrin, alpha M (complement component 3 receptor 3 subunit)	NM_001145808	3961	4234	+
6452	SH3BP2	SH3-domain binding protein 2	NM_001145855	61	240	+
6452	SH3BP2	SH3-domain binding protein 2	NM_001145855	851	1600	+
6452	SH3BP2	SH3-domain binding protein 2	NM_001145855	1914	2396	+
10940	POP1	processing of precursor 1, ribonuclease P/MRP subunit (S. cerevisiae)	NM_001145860	521	670	+
10940	POP1	processing of precursor 1, ribonuclease P/MRP subunit (S. cerevisiae)	NM_001145860	2633	3004	+
54938	SARS2	seryl-tRNA synthetase 2, mitochondrial	NM_001145901	1921	2060	+
49855	SCAPER	S-phase cyclin A-associated protein in the ER	NM_001145923	2241	2410	+
79595	SAP130	Sin3A-associated protein, 130kDa	NM_001145928	3241	3413	+
79595	SAP130	Sin3A-associated protein, 130kDa	NM_001145928	3611	3880	+
5050	PAFAH1B3	platelet-activating factor acetylhydrolase 1b, catalytic subunit 3 (29kDa)	NM_001145939	965	1090	+
93643	TJAP1	tight junction associated protein 1 (peripheral)	NM_001146018	1611	1780	+
83666	PARP9	poly (ADP-ribose) polymerase family, member 9	NM_001146106	271	410	+
83666	PARP9	poly (ADP-ribose) polymerase family, member 9	NM_001146106	621	1150	+
83666	PARP9	poly (ADP-ribose) polymerase family, member 9	NM_001146106	1861	2130	+
83666	PARP9	poly (ADP-ribose) polymerase family, member 9	NM_001146106	3461	3610	+
57708	MIER1	mesoderm induction early response 1, transcriptional regulator	NM_001146110	558	747	+
57708	MIER1	mesoderm induction early response 1, transcriptional regulator	NM_001146110	901	1290	+
57708	MIER1	mesoderm induction early response 1, transcriptional regulator	NM_001146110	1518	1919	+
64786	TBC1D15	TBC1 domain family, member 15	NM_001146214	1051	1370	+
65983	GRAMD3	GRAM domain containing 3	NM_001146321	481	620	+
65983	GRAMD3	GRAM domain containing 3	NM_001146321	1851	2277	+
9904	RBM19	RNA binding motif protein 19	NM_001146699	841	1040	+
9904	RBM19	RNA binding motif protein 19	NM_001146699	2171	2340	+
60592	SCOC	short coiled-coil protein	NM_001153585	221	626	+
60592	SCOC	short coiled-coil protein	NM_001153585	871	1080	+
308	ANXA5	annexin A5	NM_001154	391	560	+
309	ANXA6	annexin A6	NM_001155	2394	2582	+
309	ANXA6	annexin A6	NM_001155	2251	2356	+
10492	SYNCRIP	synaptotagmin binding, cytoplasmic RNA interacting protein	NM_001159677	1	240	+
10492	SYNCRIP	synaptotagmin binding, cytoplasmic RNA interacting protein	NM_001159677	851	990	+
10492	SYNCRIP	synaptotagmin binding, cytoplasmic RNA interacting protein	NM_001159677	1998	2399	+
10492	SYNCRIP	synaptotagmin binding, cytoplasmic RNA interacting protein	NM_001159677	1611	1899	+
10492	SYNCRIP	synaptotagmin binding, cytoplasmic RNA interacting protein	NM_001159677	2400	2504	+
10492	SYNCRIP	synaptotagmin binding, cytoplasmic RNA interacting protein	NM_001159677	3471	3680	+
[truncated: 12,585 more rows]
