# Supplementary material for: Evolution of transcript modification by N6-methyladenosine in primates
Source: HighWire-hosted journal article supplement (doi:10.1101/gr.212563.116), 2017-01-04
Supplement: Supplemental_Table_S3.xlsx [file Supplemental_Table_S3.xlsx]

## Sheet: sTable3.H3Peaks
GID	Symbol	Description	RefSeq_NM	Start	End	Strand
35	ACADS	acyl-CoA dehydrogenase, C-2 to C-3 short chain	NM_000017	1285	1574	+
5663	PSEN1	presenilin 1	NM_000021	1191	1360	+
5663	PSEN1	presenilin 1	NM_000021	1681	2257	+
5663	PSEN1	presenilin 1	NM_000021	4271	4450	+
100	ADA	adenosine deaminase	NM_000022	31	250	+
158	ADSL	adenylosuccinate lyase	NM_000026	1201	1360	+
158	ADSL	adenylosuccinate lyase	NM_000026	1441	1557	+
178	AGL	amylo-alpha-1, 6-glucosidase, 4-alpha-glucanotransferase	NM_000028	4161	4350	+
178	AGL	amylo-alpha-1, 6-glucosidase, 4-alpha-glucanotransferase	NM_000028	7321	7440	+
226	ALDOA	aldolase A, fructose-bisphosphate	NM_000034	2271	2384	+
367	AR	androgen receptor	NM_000044	4941	5110	+
367	AR	androgen receptor	NM_000044	6161	6260	+
367	AR	androgen receptor	NM_000044	8851	9120	+
472	ATM	ATM serine/threonine kinase	NM_000051	251	380	+
472	ATM	ATM serine/threonine kinase	NM_000051	581	750	+
472	ATM	ATM serine/threonine kinase	NM_000051	9331	9633	+
472	ATM	ATM serine/threonine kinase	NM_000051	12311	12420	+
472	ATM	ATM serine/threonine kinase	NM_000051	12551	12770	+
538	ATP7A	ATPase, Cu++ transporting, alpha polypeptide	NM_000052	343	780	+
538	ATP7A	ATPase, Cu++ transporting, alpha polypeptide	NM_000052	1216	1432	+
538	ATP7A	ATPase, Cu++ transporting, alpha polypeptide	NM_000052	4475	4820	+
538	ATP7A	ATPase, Cu++ transporting, alpha polypeptide	NM_000052	5001	5280	+
1019	CDK4	cyclin-dependent kinase 4	NM_000075	1161	1479	+
1371	CPOX	coproporphyrinogen oxidase	NM_000097	1401	1500	+
1376	CPT2	carnitine palmitoyltransferase 2	NM_000098	941	1180	+
1376	CPT2	carnitine palmitoyltransferase 2	NM_000098	1351	1557	+
1376	CPT2	carnitine palmitoyltransferase 2	NM_000098	1751	1850	+
1535	CYBA	cytochrome b-245, alpha polypeptide	NM_000101	41	190	+
1535	CYBA	cytochrome b-245, alpha polypeptide	NM_000101	511	720	+
1643	DDB2	damage-specific DNA binding protein 2, 48kDa	NM_000107	94	360	+
1643	DDB2	damage-specific DNA binding protein 2, 48kDa	NM_000107	1421	1840	+
1806	DPYD	dihydropyrimidine dehydrogenase	NM_000110	901	1080	+
1861	TOR1A	torsin family 1, member A (torsin A)	NM_000113	911	1140	+
6901	TAZ	tafazzin	NM_000116	1141	1620	+
2022	ENG	endoglin	NM_000118	2741	3050	+
2071	ERCC3	excision repair cross-complementation group 3	NM_000122	52	400	+
2073	ERCC5	excision repair cross-complementation group 5	NM_000123	1521	2120	+
2073	ERCC5	excision repair cross-complementation group 5	NM_000123	3401	3790	+
2073	ERCC5	excision repair cross-complementation group 5	NM_000123	3921	4060	+
2074	ERCC6	excision repair cross-complementation group 6	NM_000124	961	1666	+
2074	ERCC6	excision repair cross-complementation group 6	NM_000124	3441	3580	+
2074	ERCC6	excision repair cross-complementation group 6	NM_000124	3661	3940	+
2074	ERCC6	excision repair cross-complementation group 6	NM_000124	4481	4701	+
2162	F13A1	coagulation factor XIII, A1 polypeptide	NM_000129	1531	1690	+
2162	F13A1	coagulation factor XIII, A1 polypeptide	NM_000129	2321	2540	+
2162	F13A1	coagulation factor XIII, A1 polypeptide	NM_000129	3541	3680	+
2176	FANCC	Fanconi anemia, complementation group C	NM_000136	1941	2080	+
2200	FBN1	fibrillin 1	NM_000138	61	230	+
2200	FBN1	fibrillin 1	NM_000138	241	370	+
2200	FBN1	fibrillin 1	NM_000138	391	540	+
2200	FBN1	fibrillin 1	NM_000138	8671	9080	+
2271	FH	fumarate hydratase	NM_000143	1441	1593	+
2512	FTL	ferritin, light polypeptide	NM_000146	741	869	+
2517	FUCA1	fucosidase, alpha-L- 1, tissue	NM_000147	1371	1810	+
2548	GAA	glucosidase, alpha; acid	NM_000152	3603	3767	+
2639	GCDH	glutaryl-CoA dehydrogenase	NM_000159	1417	1746	+
2643	GCH1	GTP cyclohydrolase 1	NM_000161	2	180	+
2696	GIPR	gastric inhibitory polypeptide receptor	NM_000164	1	130	+
2696	GIPR	gastric inhibitory polypeptide receptor	NM_000164	1433	1995	+
2717	GLA	galactosidase, alpha	NM_000169	89	220	+
2717	GLA	galactosidase, alpha	NM_000169	1201	1381	+
2937	GSS	glutathione synthetase	NM_000178	7	210	+
2937	GSS	glutathione synthetase	NM_000178	1123	1270	+
2937	GSS	glutathione synthetase	NM_000178	1741	1898	+
2956	MSH6	mutS homolog 6	NM_000179	751	970	+
2956	MSH6	mutS homolog 6	NM_000179	1361	1713	+
2956	MSH6	mutS homolog 6	NM_000179	2820	3130	+
2956	MSH6	mutS homolog 6	NM_000179	3151	3370	+
2990	GUSB	glucuronidase, beta	NM_000181	105	290	+
2990	GUSB	glucuronidase, beta	NM_000181	581	760	+
2990	GUSB	glucuronidase, beta	NM_000181	2011	2289	+
3030	HADHA	hydroxyacyl-CoA dehydrogenase/3-ketoacyl-CoA thiolase/enoyl-CoA hydratase (trifunctional protein), alpha subunit	NM_000182	491	680	+
3030	HADHA	hydroxyacyl-CoA dehydrogenase/3-ketoacyl-CoA thiolase/enoyl-CoA hydratase (trifunctional protein), alpha subunit	NM_000182	811	1120	+
3030	HADHA	hydroxyacyl-CoA dehydrogenase/3-ketoacyl-CoA thiolase/enoyl-CoA hydratase (trifunctional protein), alpha subunit	NM_000182	2631	2804	+
3099	HK2	hexokinase 2	NM_000189	1531	1640	+
3099	HK2	hexokinase 2	NM_000189	3321	3450	+
3099	HK2	hexokinase 2	NM_000189	4581	4950	+
3099	HK2	hexokinase 2	NM_000189	5001	5170	+
3099	HK2	hexokinase 2	NM_000189	5291	5437	+
3099	HK2	hexokinase 2	NM_000189	5691	5910	+
3155	HMGCL	3-hydroxymethyl-3-methylglutaryl-CoA lyase	NM_000191	964	1360	+
3155	HMGCL	3-hydroxymethyl-3-methylglutaryl-CoA lyase	NM_000191	1411	1596	+
6448	SGSH	N-sulfoglucosamine sulfohydrolase	NM_000199	1241	1520	+
6448	SGSH	N-sulfoglucosamine sulfohydrolase	NM_000199	1771	2050	+
6448	SGSH	N-sulfoglucosamine sulfohydrolase	NM_000199	2611	2710	+
3383	ICAM1	intercellular adhesion molecule 1	NM_000201	561	670	+
3383	ICAM1	intercellular adhesion molecule 1	NM_000201	1780	2408	+
3383	ICAM1	intercellular adhesion molecule 1	NM_000201	2571	2790	+
3423	IDS	iduronate 2-sulfatase	NM_000202	1308	1804	+
3423	IDS	iduronate 2-sulfatase	NM_000202	4231	4681	+
3561	IL2RG	interleukin 2 receptor, gamma	NM_000206	66	190	+
3561	IL2RG	interleukin 2 receptor, gamma	NM_000206	1411	1510	+
3643	INSR	insulin receptor	NM_000208	3991	4250	+
3651	PDX1	pancreatic and duodenal homeobox 1	NM_000209	651	790	+
3651	PDX1	pancreatic and duodenal homeobox 1	NM_000209	1281	1410	+
3689	ITGB2	integrin, beta 2 (complement component 3 receptor 3 and 4 subunit)	NM_000211	131	290	+
3689	ITGB2	integrin, beta 2 (complement component 3 receptor 3 and 4 subunit)	NM_000211	2641	2915	+
182	JAG1	jagged 1	NM_000214	3861	4240	+
3718	JAK3	Janus kinase 3	NM_000215	1591	1810	+
3718	JAK3	Janus kinase 3	NM_000215	3331	3570	+
3718	JAK3	Janus kinase 3	NM_000215	5191	5360	+
3978	LIG1	ligase I, DNA, ATP-dependent	NM_000234	301	670	+
3978	LIG1	ligase I, DNA, ATP-dependent	NM_000234	741	1230	+
3978	LIG1	ligase I, DNA, ATP-dependent	NM_000234	2111	2280	+
3988	LIPA	lipase A, lysosomal acid, cholesterol esterase	NM_000235	1231	1627	+
4292	MLH1	mutL homolog 1	NM_000249	1381	1730	+
4548	MTR	5-methyltetrahydrofolate-homocysteine methyltransferase	NM_000254	4231	4380	+
4548	MTR	5-methyltetrahydrofolate-homocysteine methyltransferase	NM_000254	4401	4580	+
4548	MTR	5-methyltetrahydrofolate-homocysteine methyltransferase	NM_000254	4621	4780	+
4548	MTR	5-methyltetrahydrofolate-homocysteine methyltransferase	NM_000254	10221	10390	+
4644	MYO5A	myosin VA (heavy chain 12, myoxin)	NM_000259	4521	4630	+
4644	MYO5A	myosin VA (heavy chain 12, myoxin)	NM_000259	5751	5930	+
4668	NAGA	N-acetylgalactosaminidase, alpha-	NM_000262	1811	2200	+
4669	NAGLU	N-acetylglucosaminidase, alpha	NM_000263	1571	1730	+
4669	NAGLU	N-acetylglucosaminidase, alpha	NM_000263	2041	2380	+
4669	NAGLU	N-acetylglucosaminidase, alpha	NM_000263	2571	2750	+
653361	NCF1	neutrophil cytosolic factor 1	NM_000265	471	570	+
4860	PNP	purine nucleoside phosphorylase	NM_000270	48	150	+
4860	PNP	purine nucleoside phosphorylase	NM_000270	1271	1492	+
4864	NPC1	Niemann-Pick disease, type C1	NM_000271	1501	1830	+
4864	NPC1	Niemann-Pick disease, type C1	NM_000271	3991	4499	+
5190	PEX6	peroxisomal biogenesis factor 6	NM_000287	445	995	+
5256	PHKA2	phosphorylase kinase, alpha 2 (liver)	NM_000292	3954	4640	+
5261	PHKG2	phosphorylase kinase, gamma 2 (testis)	NM_000294	1351	1697	+
5311	PKD2	polycystic kidney disease 2 (autosomal dominant)	NM_000297	2621	3010	+
5351	PLOD1	procollagen-lysine, 2-oxoglutarate 5-dioxygenase 1	NM_000302	351	490	+
5351	PLOD1	procollagen-lysine, 2-oxoglutarate 5-dioxygenase 1	NM_000302	2181	2920	+
5373	PMM2	phosphomannomutase 2	NM_000303	1611	1800	+
5373	PMM2	phosphomannomutase 2	NM_000303	2121	2292	+
5925	RB1	retinoblastoma 1	NM_000321	131	310	+
5925	RB1	retinoblastoma 1	NM_000321	1941	2120	+
5925	RB1	retinoblastoma 1	NM_000321	2661	3040	+
6310	ATXN1	ataxin 1	NM_000332	841	1170	+
6310	ATXN1	ataxin 1	NM_000332	2721	2830	+
6310	ATXN1	ataxin 1	NM_000332	3071	3410	+
6314	ATXN7	ataxin 7	NM_000333	1711	1890	+
6314	ATXN7	ataxin 7	NM_000333	2461	3500	+
6314	ATXN7	ataxin 7	NM_000333	5121	5257	+
6662	SOX9	SRY (sex determining region Y)-box 9	NM_000346	2012	2270	+
412	STS	steroid sulfatase (microsomal), isozyme S	NM_000351	701	870	+
412	STS	steroid sulfatase (microsomal), isozyme S	NM_000351	1751	2400	+
412	STS	steroid sulfatase (microsomal), isozyme S	NM_000351	5431	5580	+
6948	TCN2	transcobalamin II	NM_000355	1551	1744	+
6948	TCN2	transcobalamin II	NM_000355	1951	2070	+
7248	TSC1	tuberous sclerosis 1	NM_000368	1941	2210	+
7248	TSC1	tuberous sclerosis 1	NM_000368	3455	3810	+
7248	TSC1	tuberous sclerosis 1	NM_000368	3821	4010	+
7248	TSC1	tuberous sclerosis 1	NM_000368	6841	6990	+
7248	TSC1	tuberous sclerosis 1	NM_000368	7071	7470	+
7248	TSC1	tuberous sclerosis 1	NM_000368	7981	8130	+
7372	UMPS	uridine monophosphate synthetase	NM_000373	431	1100	+
7372	UMPS	uridine monophosphate synthetase	NM_000373	1401	1626	+
7389	UROD	uroporphyrinogen decarboxylase	NM_000374	106	270	+
7454	WAS	Wiskott-Aldrich syndrome	NM_000377	1671	1787	+
642	BLMH	bleomycin hydrolase	NM_000386	1652	1919	+
642	BLMH	bleomycin hydrolase	NM_000386	2401	2530	+
788	SLC25A20	solute carrier family 25 (carnitine/acylcarnitine translocase), member 20	NM_000387	1111	1340	+
788	SLC25A20	solute carrier family 25 (carnitine/acylcarnitine translocase), member 20	NM_000387	1711	1853	+
1200	TPP1	tripeptidyl peptidase I	NM_000391	44	160	+
1200	TPP1	tripeptidyl peptidase I	NM_000391	2831	3068	+
1439	CSF2RB	colony stimulating factor 2 receptor, beta, low-affinity (granulocyte-macrophage)	NM_000395	1891	2350	+
1536	CYBB	cytochrome b-245, beta polypeptide	NM_000397	1771	1880	+
1536	CYBB	cytochrome b-245, beta polypeptide	NM_000397	3177	3413	+
1959	EGR2	early growth response 2	NM_000399	1071	1290	+
2068	ERCC2	excision repair cross-complementation group 2	NM_000400	811	980	+
2720	GLB1	galactosidase, beta 1	NM_000404	1608	1822	+
2720	GLB1	galactosidase, beta 1	NM_000404	1931	2283	+
2760	GM2A	GM2 ganglioside activator	NM_000405	135	280	+
2760	GM2A	GM2 ganglioside activator	NM_000405	901	1104	+
2760	GM2A	GM2 ganglioside activator	NM_000405	2411	2539	+
3459	IFNGR1	interferon gamma receptor 1	NM_000416	1171	1280	+
3459	IFNGR1	interferon gamma receptor 1	NM_000416	1371	1530	+
5048	PAFAH1B1	platelet-activating factor acetylhydrolase 1b, regulatory subunit 1 (45kDa)	NM_000430	17	260	+
5048	PAFAH1B1	platelet-activating factor acetylhydrolase 1b, regulatory subunit 1 (45kDa)	NM_000430	5081	5495	+
4758	NEU1	sialidase 1 (lysosomal sialidase)	NM_000434_4	1351	1740	+
4758	NEU1	sialidase 1 (lysosomal sialidase)	NM_000434_4	1781	1909	+
5019	OXCT1	3-oxoacid CoA transferase 1	NM_000436	741	870	+
5051	PAFAH2	platelet-activating factor acetylhydrolase 2, 40kDa	NM_000437	1431	1873	+
5051	PAFAH2	platelet-activating factor acetylhydrolase 2, 40kDa	NM_000437	2121	2230	+
5993	RFX5	regulatory factor X, 5 (influences HLA class II expression)	NM_000449	33	140	+
5993	RFX5	regulatory factor X, 5 (influences HLA class II expression)	NM_000449	1041	1200	+
5993	RFX5	regulatory factor X, 5 (influences HLA class II expression)	NM_000449	1394	1820	+
6794	STK11	serine/threonine kinase 11	NM_000455	651	1260	+
6821	SUOX	sulfite oxidase	NM_000456	1721	1910	+
6928	HNF1B	HNF1 homeobox B	NM_000458	251	390	+
6928	HNF1B	HNF1 homeobox B	NM_000458	2141	2410	+
7337	UBE3A	ubiquitin protein ligase E3A	NM_000462	1814	2180	+
580	BARD1	BRCA1 associated RING domain 1	NM_000465	631	1290	+
275	AMT	aminomethyltransferase	NM_000481	1481	1610	+
275	AMT	aminomethyltransferase	NM_000481	1901	2200	+
353	APRT	adenine phosphoribosyltransferase	NM_000485	661	800	+
546	ATRX	alpha thalassemia/mental retardation syndrome X-linked	NM_000489	2431	2660	+
2161	F12	coagulation factor XII (Hageman factor)	NM_000505	1881	2050	+
3949	LDLR	low density lipoprotein receptor	NM_000527	2761	3130	+
3949	LDLR	low density lipoprotein receptor	NM_000527	3391	3510	+
3949	LDLR	low density lipoprotein receptor	NM_000527	3641	3810	+
3949	LDLR	low density lipoprotein receptor	NM_000527	4591	4730	+
3949	LDLR	low density lipoprotein receptor	NM_000527	5071	5252	+
5395	PMS2	PMS2 postmeiotic segregation increased 2 (S. cerevisiae)	NM_000535	1661	1880	+
5994	RFXAP	regulatory factor X-associated protein	NM_000538	351	525	+
7249	TSC2	tuberous sclerosis 2	NM_000548	4291	4560	+
7249	TSC2	tuberous sclerosis 2	NM_000548	4591	4720	+
7249	TSC2	tuberous sclerosis 2	NM_000548	5291	5620	+
7486	WRN	Werner syndrome, RecQ helicase-like	NM_000553	1591	1980	+
7486	WRN	Werner syndrome, RecQ helicase-like	NM_000553	4922	5167	+
6890	TAP1	transporter 1, ATP-binding cassette, sub-family B (MDR/TAP)	NM_000593_8	281	510	+
6890	TAP1	transporter 1, ATP-binding cassette, sub-family B (MDR/TAP)	NM_000593_8	2623	2945	+
7124	TNF	tumor necrosis factor	NM_000594_7	871	1150	+
960	CD44	CD44 molecule (Indian blood group)	NM_000610	1051	1150	+
960	CD44	CD44 molecule (Indian blood group)	NM_000610	2218	2360	+
960	CD44	CD44 molecule (Indian blood group)	NM_000610	2481	2743	+
3588	IL10RB	interleukin 10 receptor, beta	NM_000628	1091	1354	+
3588	IL10RB	interleukin 10 receptor, beta	NM_000628	1561	1888	+
3454	IFNAR1	interferon (alpha, beta and omega) receptor 1	NM_000629	1761	1970	+
3454	IFNAR1	interferon (alpha, beta and omega) receptor 1	NM_000629	4271	4370	+
596	BCL2	B-cell CLL/lymphoma 2	NM_000633	841	1116	+
596	BCL2	B-cell CLL/lymphoma 2	NM_000633	1711	1960	+
596	BCL2	B-cell CLL/lymphoma 2	NM_000633	2001	2260	+
596	BCL2	B-cell CLL/lymphoma 2	NM_000633	2411	2730	+
596	BCL2	B-cell CLL/lymphoma 2	NM_000633	5861	6020	+
5990	RFX2	regulatory factor X, 2 (influences HLA class II expression)	NM_000635	3041	3180	+
5990	RFX2	regulatory factor X, 2 (influences HLA class II expression)	NM_000635	3371	3580	+
2936	GSR	glutathione reductase	NM_000637	631	770	+
2936	GSR	glutathione reductase	NM_000637	1461	1760	+
6402	SELL	selectin L	NM_000655	281	636	+
6402	SELL	selectin L	NM_000655	1511	1700	+
7040	TGFB1	transforming growth factor, beta 1	NM_000660	191	650	+
7040	TGFB1	transforming growth factor, beta 1	NM_000660	871	1040	+
95	ACY1	aminoacylase 1	NM_000666	1491	1670	+
128	ADH5	alcohol dehydrogenase 5 (class III), chi polypeptide	NM_000671	69	220	+
211	ALAS1	5'-aminolevulinate synthase 1	NM_000688	71	186	+
211	ALAS1	5'-aminolevulinate synthase 1	NM_000688	341	470	+
211	ALAS1	5'-aminolevulinate synthase 1	NM_000688	2021	2180	+
240	ALOX5	arachidonate 5-lipoxygenase	NM_000698	52	200	+
240	ALOX5	arachidonate 5-lipoxygenase	NM_000698	881	1080	+
240	ALOX5	arachidonate 5-lipoxygenase	NM_000698	2081	2440	+
593	BCKDHA	branched chain keto acid dehydrogenase E1, alpha polypeptide	NM_000709	1581	1730	+
645	BLVRB	biliverdin reductase B	NM_000713	661	850	+
776	CACNA1D	calcium channel, voltage-dependent, L type, alpha 1D subunit	NM_000720	1401	1560	+
776	CACNA1D	calcium channel, voltage-dependent, L type, alpha 1D subunit	NM_000720	2491	2730	+
776	CACNA1D	calcium channel, voltage-dependent, L type, alpha 1D subunit	NM_000720	6464	6800	+
782	CACNB1	calcium channel, voltage-dependent, beta 1 subunit	NM_000723	1611	1990	+
1140	CHRNB1	cholinergic receptor, nicotinic, beta 1 (muscle)	NM_000747	1511	1770	+
1312	COMT	catechol-O-methyltransferase	NM_000754	1071	1281	+
1435	CSF1	colony stimulating factor 1 (macrophage)	NM_000757	1001	1170	+
1435	CSF1	colony stimulating factor 1 (macrophage)	NM_000757	1241	1670	+
1435	CSF1	colony stimulating factor 1 (macrophage)	NM_000757	2131	2730	+
1435	CSF1	colony stimulating factor 1 (macrophage)	NM_000757	2811	3070	+
1719	DHFR	dihydrofolate reductase	NM_000791	3171	3400	+
1719	DHFR	dihydrofolate reductase	NM_000791	3601	3750	+
2557	GABRA4	gamma-aminobutyric acid (GABA) A receptor, alpha 4	NM_000809	2031	2630	+
2907	GRINA	glutamate receptor, ionotropic, N-methyl D-aspartate-associated protein 1 (glutamate binding)	NM_000837	1461	1710	+
2982	GUCY1A3	guanylate cyclase 1, soluble, alpha 3	NM_000856	1301	1916	+
2982	GUCY1A3	guanylate cyclase 1, soluble, alpha 3	NM_000856	2401	2580	+
2982	GUCY1A3	guanylate cyclase 1, soluble, alpha 3	NM_000856	3421	3630	+
2987	GUK1	guanylate kinase 1	NM_000858	1021	1141	+
3156	HMGCR	3-hydroxy-3-methylglutaryl-CoA reductase	NM_000859	2721	2951	+
3482	IGF2R	insulin-like growth factor 2 receptor	NM_000876	1671	1860	+
3482	IGF2R	insulin-like growth factor 2 receptor	NM_000876	6051	6160	+
3482	IGF2R	insulin-like growth factor 2 receptor	NM_000876	7132	7787	+
3482	IGF2R	insulin-like growth factor 2 receptor	NM_000876	8631	8996	+
3554	IL1R1	interleukin 1 receptor, type I	NM_000877	1781	1940	+
3554	IL1R1	interleukin 1 receptor, type I	NM_000877	4551	4720	+
3560	IL2RB	interleukin 2 receptor, beta	NM_000878	11	120	+
3560	IL2RB	interleukin 2 receptor, beta	NM_000878	2071	2270	+
3614	IMPDH1	IMP (inosine 5'-monophosphate) dehydrogenase 1	NM_000883	1581	1750	+
3615	IMPDH2	IMP (inosine 5'-monophosphate) dehydrogenase 2	NM_000884	581	910	+
3687	ITGAX	integrin, alpha X (complement component 3 receptor 4 subunit)	NM_000887	51	170	+
3687	ITGAX	integrin, alpha X (complement component 3 receptor 4 subunit)	NM_000887	471	570	+
3687	ITGAX	integrin, alpha X (complement component 3 receptor 4 subunit)	NM_000887	3511	3919	+
3687	ITGAX	integrin, alpha X (complement component 3 receptor 4 subunit)	NM_000887	4031	4337	+
3695	ITGB7	integrin, beta 7	NM_000889	31	220	+
3695	ITGB7	integrin, beta 7	NM_000889	391	530	+
3695	ITGB7	integrin, beta 7	NM_000889	2551	2859	+
4048	LTA4H	leukotriene A4 hydrolase	NM_000895	321	420	+
4881	NPR1	natriuretic peptide receptor 1	NM_000906	3671	3900	+
5034	P4HB	prolyl 4-hydroxylase, beta polypeptide	NM_000918	1601	1870	+
5034	P4HB	prolyl 4-hydroxylase, beta polypeptide	NM_000918	2091	2310	+
5034	P4HB	prolyl 4-hydroxylase, beta polypeptide	NM_000918	2431	2570	+
5066	PAM	peptidylglycine alpha-amidating monooxygenase	NM_000919	1381	1879	+
5066	PAM	peptidylglycine alpha-amidating monooxygenase	NM_000919	3071	3280	+
5066	PAM	peptidylglycine alpha-amidating monooxygenase	NM_000919	3721	3820	+
5143	PDE4C	phosphodiesterase 4C, cAMP-specific	NM_000923	2121	2493	+
5430	POLR2A	polymerase (RNA) II (DNA directed) polypeptide A, 220kDa	NM_000937	511	637	+
5430	POLR2A	polymerase (RNA) II (DNA directed) polypeptide A, 220kDa	NM_000937	801	1080	+
5430	POLR2A	polymerase (RNA) II (DNA directed) polypeptide A, 220kDa	NM_000937	4191	4470	+
5430	POLR2A	polymerase (RNA) II (DNA directed) polypeptide A, 220kDa	NM_000937	5111	6309	+
5431	POLR2B	polymerase (RNA) II (DNA directed) polypeptide B, 140kDa	NM_000938	1	150	+
5431	POLR2B	polymerase (RNA) II (DNA directed) polypeptide B, 140kDa	NM_000938	1881	2130	+
5431	POLR2B	polymerase (RNA) II (DNA directed) polypeptide B, 140kDa	NM_000938	2601	2840	+
5447	POR	P450 (cytochrome) oxidoreductase	NM_000941	2171	2350	+
5534	PPP3R1	protein phosphatase 3, regulatory subunit B, alpha	NM_000945	981	1169	+
6122	RPL3	ribosomal protein L3	NM_000967	1231	1330	+
6124	RPL4	ribosomal protein L4	NM_000968	951	1399	+
6125	RPL5	ribosomal protein L5	NM_000969	691	1023	+
6129	RPL7	ribosomal protein L7	NM_000971	56	330	+
6135	RPL11	ribosomal protein L11	NM_000975	531	630	+
6141	RPL18	ribosomal protein L18	NM_000979	711	880	+
6142	RPL18A	ribosomal protein L18a	NM_000980	471	654	+
6139	RPL17	ribosomal protein L17	NM_000985	781	958	+
6154	RPL26	ribosomal protein L26	NM_000987	421	555	+
6157	RPL27A	ribosomal protein L27a	NM_000990	731	846	+
6159	RPL29	ribosomal protein L29	NM_000992	511	690	+
6165	RPL35A	ribosomal protein L35a	NM_000996	371	470	+
6167	RPL37	ribosomal protein L37	NM_000997	321	420	+
490	ATP2B1	ATPase, Ca++ transporting, plasma membrane 1	NM_001001323	135	413	+
490	ATP2B1	ATPase, Ca++ transporting, plasma membrane 1	NM_001001323	631	780	+
490	ATP2B1	ATPase, Ca++ transporting, plasma membrane 1	NM_001001323	990	1293	+
490	ATP2B1	ATPase, Ca++ transporting, plasma membrane 1	NM_001001323	1581	1710	+
490	ATP2B1	ATPase, Ca++ transporting, plasma membrane 1	NM_001001323	2061	2170	+
490	ATP2B1	ATPase, Ca++ transporting, plasma membrane 1	NM_001001323	2311	2490	+
490	ATP2B1	ATPase, Ca++ transporting, plasma membrane 1	NM_001001323	3391	3535	+
490	ATP2B1	ATPase, Ca++ transporting, plasma membrane 1	NM_001001323	3744	4369	+
221035	REEP3	receptor accessory protein 3	NM_001001330	621	910	+
115939	TSR3	TSR3, 20S rRNA accumulation, homolog (S. cerevisiae)	NM_001001410	878	1087	+
115939	TSR3	TSR3, 20S rRNA accumulation, homolog (S. cerevisiae)	NM_001001410	1088	1194	+
4090	SMAD5	SMAD family member 5	NM_001001419	351	750	+
4090	SMAD5	SMAD family member 5	NM_001001419	931	1140	+
4090	SMAD5	SMAD family member 5	NM_001001419	1774	1940	+
4090	SMAD5	SMAD family member 5	NM_001001419	3381	3520	+
8675	STX16	syntaxin 16	NM_001001433	35	240	+
8675	STX16	syntaxin 16	NM_001001433	1541	1660	+
8675	STX16	syntaxin 16	NM_001001433	1751	2043	+
8675	STX16	syntaxin 16	NM_001001433	2571	2710	+
8675	STX16	syntaxin 16	NM_001001433	2731	2920	+
414062	CCL3L3	chemokine (C-C motif) ligand 3-like 3	NM_001001437_5	411	510	+
9317	PTER	phosphotriesterase related	NM_001001484	371	620	+
84717	HDGFRP2	hepatoma-derived growth factor-related protein 2	NM_001001520	1791	1970	+
84717	HDGFRP2	hepatoma-derived growth factor-related protein 2	NM_001001520	2161	2280	+
112950	MED8	mediator complex subunit 8	NM_001001653	441	810	+
112950	MED8	mediator complex subunit 8	NM_001001653	961	1190	+
144363	LYRM5	LYR motif containing 5	NM_001001660	251	370	+
339745	SPOPL	speckle-type POZ protein-like	NM_001001664	1491	1786	+
414918	DENND6B	DENN/MADD domain containing 6B	NM_001001794	1891	2000	+
415116	PIM3	Pim-3 proto-oncogene, serine/threonine kinase	NM_001001852	1281	1700	+
509	ATP5C1	ATP synthase, H+ transporting, mitochondrial F1 complex, gamma polypeptide 1	NM_001001973	171	370	+
5394	EXOSC10	exosome component 10	NM_001001998	2201	2550	+
5394	EXOSC10	exosome component 10	NM_001001998	2641	2790	+
5211	PFKL	phosphofructokinase, liver	NM_001002021	2781	3010	+
5211	PFKL	phosphofructokinase, liver	NM_001002021	3031	3180	+
5211	PFKL	phosphofructokinase, liver	NM_001002021	3261	3404	+
55862	ECHDC1	ethylmalonyl-CoA decarboxylase 1	NM_001002030	61	270	+
55862	ECHDC1	ethylmalonyl-CoA decarboxylase 1	NM_001002030	761	1030	+
55862	ECHDC1	ethylmalonyl-CoA decarboxylase 1	NM_001002030	1061	1226	+
517	ATP5G2	ATP synthase, H+ transporting, mitochondrial Fo complex, subunit C2 (subunit 9)	NM_001002031	571	690	+
517	ATP5G2	ATP synthase, H+ transporting, mitochondrial Fo complex, subunit C2 (subunit 9)	NM_001002031	1021	1142	+
51529	ANAPC11	anaphase promoting complex subunit 11	NM_001002244	761	899	+
94240	EPSTI1	epithelial stromal interaction 1 (breast)	NM_001002264	261	490	+
94240	EPSTI1	epithelial stromal interaction 1 (breast)	NM_001002264	851	1010	+
51125	GOLGA7	golgin A7	NM_001002296	561	880	+
54788	DNAJB12	DnaJ (Hsp40) homolog, subfamily B, member 12	NM_001002762	2536	2714	+
10051	SMC4	structural maintenance of chromosomes 4	NM_001002800	1751	1910	+
80223	RAB11FIP1	RAB11 family interacting protein 1 (class I)	NM_001002814	451	700	+
80223	RAB11FIP1	RAB11 family interacting protein 1 (class I)	NM_001002814	1151	1370	+
80223	RAB11FIP1	RAB11 family interacting protein 1 (class I)	NM_001002814	3871	4071	+
80223	RAB11FIP1	RAB11 family interacting protein 1 (class I)	NM_001002814	6601	6840	+
80223	RAB11FIP1	RAB11 family interacting protein 1 (class I)	NM_001002814	7031	7150	+
55727	BTBD7	BTB (POZ) domain containing 7	NM_001002860	151	310	+
55727	BTBD7	BTB (POZ) domain containing 7	NM_001002860	1091	1390	+
55727	BTBD7	BTB (POZ) domain containing 7	NM_001002860	2531	2790	+
55727	BTBD7	BTB (POZ) domain containing 7	NM_001002860	2991	3870	+
8563	THOC5	THO complex 5	NM_001002878	311	740	+
8563	THOC5	THO complex 5	NM_001002878	2381	2644	+
25776	CBY1	chibby homolog 1 (Drosophila)	NM_001002880	611	890	+
23131	GPATCH8	G patch domain containing 8	NM_001002909	3711	3850	+
147040	KCTD11	potassium channel tetramerization domain containing 11	NM_001002914	1531	1790	+
221830	TWISTNB	TWIST neighbor	NM_001002926	624	1023	+
3983	ABLIM1	actin binding LIM protein 1	NM_001003408	2471	2760	+
3983	ABLIM1	actin binding LIM protein 1	NM_001003408	2821	2930	+
3983	ABLIM1	actin binding LIM protein 1	NM_001003408	7061	7210	+
4087	SMAD2	SMAD family member 2	NM_001003652	416	658	+
4087	SMAD2	SMAD family member 2	NM_001003652	1631	1997	+
753	LDLRAD4	low density lipoprotein receptor class A domain containing 4	NM_001003674	1671	1860	+
79096	C11orf49	chromosome 11 open reading frame 49	NM_001003676	1491	1970	+
10042	HMGXB4	HMG box domain containing 4	NM_001003681	721	1010	+
10042	HMGXB4	HMG box domain containing 4	NM_001003681	1051	1290	+
29796	UQCR10	ubiquinol-cytochrome c reductase, complex III subunit X	NM_001003684	285	505	+
9587	MAD2L1BP	MAD2L1 binding protein	NM_001003690	641	810	+
7862	BRPF1	bromodomain and PHD finger containing, 1	NM_001003694	1061	1240	+
6239	RREB1	ras responsive element binding protein 1	NM_001003699	3311	3410	+
6239	RREB1	ras responsive element binding protein 1	NM_001003699	3901	4090	+
6239	RREB1	ras responsive element binding protein 1	NM_001003699	4661	4850	+
6239	RREB1	ras responsive element binding protein 1	NM_001003699	4961	5250	+
6239	RREB1	ras responsive element binding protein 1	NM_001003699	5511	6020	+
2733	GLE1	GLE1 RNA export mediator	NM_001003722	291	830	+
2733	GLE1	GLE1 RNA export mediator	NM_001003722	1042	1289	+
23299	BICD2	bicaudal D homolog 2 (Drosophila)	NM_001003800	1151	1430	+
23299	BICD2	bicaudal D homolog 2 (Drosophila)	NM_001003800	1471	1590	+
23299	BICD2	bicaudal D homolog 2 (Drosophila)	NM_001003800	1601	1700	+
23299	BICD2	bicaudal D homolog 2 (Drosophila)	NM_001003800	2411	2530	+
23299	BICD2	bicaudal D homolog 2 (Drosophila)	NM_001003800	6271	6410	+
29780	PARVB	parvin, beta	NM_001003828	323	510	+
29780	PARVB	parvin, beta	NM_001003828	1381	1574	+
90427	BMF	Bcl2 modifying factor	NM_001003940	1041	1270	+
90427	BMF	Bcl2 modifying factor	NM_001003940	1351	1630	+
90427	BMF	Bcl2 modifying factor	NM_001003940	2091	2340	+
90427	BMF	Bcl2 modifying factor	NM_001003940	2925	3110	+
8444	DYRK3	dual-specificity tyrosine-(Y)-phosphorylation regulated kinase 3	NM_001004023	1021	1170	+
408050	NOMO3	NODAL modulator 3	NM_001004067	2211	2420	+
408050	NOMO3	NODAL modulator 3	NM_001004067	3679	4022	+
4345	CD200	CD200 molecule	NM_001004196	421	560	+
283337	ZNF740	zinc finger protein 740	NM_001004304	1	430	+
283337	ZNF740	zinc finger protein 740	NM_001004304	471	661	+
283337	ZNF740	zinc finger protein 740	NM_001004304	1002	1410	+
283337	ZNF740	zinc finger protein 740	NM_001004304	3481	3670	+
440400	RNASEK	ribonuclease, RNase K	NM_001004333	542	783	+
1107	CHD3	chromodomain helicase DNA binding protein 3	NM_001005271	266	561	+
1107	CHD3	chromodomain helicase DNA binding protein 3	NM_001005271	862	1080	+
1107	CHD3	chromodomain helicase DNA binding protein 3	NM_001005271	2211	2310	+
1107	CHD3	chromodomain helicase DNA binding protein 3	NM_001005271	5051	5260	+
1107	CHD3	chromodomain helicase DNA binding protein 3	NM_001005271	6231	6390	+
6720	SREBF1	sterol regulatory element binding transcription factor 1	NM_001005291	317	790	+
6720	SREBF1	sterol regulatory element binding transcription factor 1	NM_001005291	31	288	+
9500	MAGED1	melanoma antigen family D1	NM_001005333	1281	1450	+
9500	MAGED1	melanoma antigen family D1	NM_001005333	1511	1790	+
6001	RGS10	regulator of G-protein signaling 10	NM_001005339	551	789	+
205	AK4	adenylate kinase 4	NM_001005353	177	280	+
205	AK4	adenylate kinase 4	NM_001005353	971	1280	+
205	AK4	adenylate kinase 4	NM_001005353	2061	2267	+
1785	DNM2	dynamin 2	NM_001005360	2631	2789	+
4528	MTIF2	mitochondrial translational initiation factor 2	NM_001005369	941	1270	+
4528	MTIF2	mitochondrial translational initiation factor 2	NM_001005369	2041	2307	+
10097	ACTR2	ARP2 actin-related protein 2 homolog (yeast)	NM_001005386	3311	3410	+
388403	YPEL2	yippee-like 2 (Drosophila)	NM_001005404	591	870	+
11200	CHEK2	checkpoint kinase 2	NM_001005735	221	340	+
2629	GBA	glucosidase, beta, acid	NM_001005741_2	2021	2260	+
2629	GBA	glucosidase, beta, acid	NM_001005741_2	2331	2578	+
8650	NUMB	numb homolog (Drosophila)	NM_001005743	51	150	+
8650	NUMB	numb homolog (Drosophila)	NM_001005743	1051	1170	+
8650	NUMB	numb homolog (Drosophila)	NM_001005743	2161	2500	+
387680	FAM21A	family with sequence similarity 21, member A	NM_001005751	3401	3590	+
339123	JMJD8	jumonji domain containing 8	NM_001005920	1001	1270	+
56941	HMCES	5-hydroxymethylcytosine (hmC) binding, ES cell-specific	NM_001006109	21	130	+
56941	HMCES	5-hydroxymethylcytosine (hmC) binding, ES cell-specific	NM_001006109	151	310	+
56941	HMCES	5-hydroxymethylcytosine (hmC) binding, ES cell-specific	NM_001006109	1201	1486	+
79109	MAPKAP1	mitogen-activated protein kinase associated protein 1	NM_001006617	261	400	+
79109	MAPKAP1	mitogen-activated protein kinase associated protein 1	NM_001006617	2191	2290	+
55114	ARHGAP17	Rho GTPase activating protein 17	NM_001006634	2221	2460	+
55114	ARHGAP17	Rho GTPase activating protein 17	NM_001006634	2701	3000	+
55114	ARHGAP17	Rho GTPase activating protein 17	NM_001006634	3191	3400	+
1380	CR2	complement component (3d/Epstein Barr virus) receptor 2	NM_001006658	1061	1240	+
1380	CR2	complement component (3d/Epstein Barr virus) receptor 2	NM_001006658	2521	2790	+
1380	CR2	complement component (3d/Epstein Barr virus) receptor 2	NM_001006658	3331	3710	+
10195	ALG3	ALG3, alpha-1,3- mannosyltransferase	NM_001006941	1101	1250	+
10195	ALG3	ALG3, alpha-1,3- mannosyltransferase	NM_001006941	1441	1550	+
6191	RPS4X	ribosomal protein S4, X-linked	NM_001007	797	949	+
9527	GOSR1	golgi SNAP receptor complex member 1	NM_001007024	711	967	+
9527	GOSR1	golgi SNAP receptor complex member 1	NM_001007024	1204	1420	+
9527	GOSR1	golgi SNAP receptor complex member 1	NM_001007024	2131	2300	+
7587	ZNF37A	zinc finger protein 37A	NM_001007094	6381	6540	+
7587	ZNF37A	zinc finger protein 37A	NM_001007094	6601	6720	+
8405	SPOP	speckle-type POZ protein	NM_001007226	1584	2075	+
6760	SS18	synovial sarcoma translocation, chromosome 18	NM_001007559	1341	1490	+
126298	IRGQ	immunity-related GTPase family, Q	NM_001007561	231	630	+
126298	IRGQ	immunity-related GTPase family, Q	NM_001007561	1103	1527	+
126298	IRGQ	immunity-related GTPase family, Q	NM_001007561	7727	8094	+
10390	CEPT1	choline/ethanolamine phosphotransferase 1	NM_001007794	105	280	+
10390	CEPT1	choline/ethanolamine phosphotransferase 1	NM_001007794	291	563	+
10133	OPTN	optineurin	NM_001008211	571	770	+
51114	ZDHHC9	zinc finger, DHHC-type containing 9	NM_001008222	1411	1680	+
8545	CGGBP1	CGG triplet repeat binding protein 1	NM_001008390	681	880	+
201725	C4orf46	chromosome 4 open reading frame 46	NM_001008393	431	695	+
4735	2015-09-02	septin 2	NM_001008491	1034	1300	+
4735	2015-09-02	septin 2	NM_001008491	1351	1720	+
4735	2015-09-02	septin 2	NM_001008491	3091	3227	+
169200	TMEM64	transmembrane protein 64	NM_001008495	971	1150	+
5641	LGMN	legumain	NM_001008530	87	217	+
5641	LGMN	legumain	NM_001008530	1141	1370	+
7852	CXCR4	chemokine (C-X-C motif) receptor 4	NM_001008540	511	710	+
56267	CCBL2	cysteine conjugate-beta lyase 2	NM_001008661	163	320	+
24144	TFIP11	tuftelin interacting protein 11	NM_001008697	2511	2908	+
8576	STK16	serine/threonine kinase 16	NM_001008910	1305	1422	+
8576	STK16	serine/threonine kinase 16	NM_001008910	1111	1267	+
9793	CKAP5	cytoskeleton associated protein 5	NM_001008938	911	1100	+
9793	CKAP5	cytoskeleton associated protein 5	NM_001008938	1681	1941	+
9793	CKAP5	cytoskeleton associated protein 5	NM_001008938	3461	3760	+
9793	CKAP5	cytoskeleton associated protein 5	NM_001008938	5581	5680	+
9793	CKAP5	cytoskeleton associated protein 5	NM_001008938	6021	6300	+
22883	CLSTN1	calsyntenin 1	NM_001009566	3452	3752	+
22883	CLSTN1	calsyntenin 1	NM_001009566	3911	4120	+
22883	CLSTN1	calsyntenin 1	NM_001009566	4211	4510	+
23318	ZCCHC11	zinc finger, CCHC domain containing 11	NM_001009881	661	780	+
23318	ZCCHC11	zinc finger, CCHC domain containing 11	NM_001009881	2421	2630	+
23318	ZCCHC11	zinc finger, CCHC domain containing 11	NM_001009881	2751	2880	+
146712	B3GNTL1	UDP-GlcNAc:betaGal beta-1,3-N-acetylglucosaminyltransferase-like 1	NM_001009905	1191	1380	+
23355	VPS8	vacuolar protein sorting 8 homolog (S. cerevisiae)	NM_001009921	4561	5026	+
29058	TMEM230	transmembrane protein 230	NM_001009924	811	940	+
5310	PKD1	polycystic kidney disease 1 (autosomal dominant)	NM_001009944	1	170	+
5310	PKD1	polycystic kidney disease 1 (autosomal dominant)	NM_001009944	1081	1240	+
5310	PKD1	polycystic kidney disease 1 (autosomal dominant)	NM_001009944	2501	2610	+
5310	PKD1	polycystic kidney disease 1 (autosomal dominant)	NM_001009944	2871	3080	+
5310	PKD1	polycystic kidney disease 1 (autosomal dominant)	NM_001009944	3701	4170	+
5310	PKD1	polycystic kidney disease 1 (autosomal dominant)	NM_001009944	4411	4930	+
5310	PKD1	polycystic kidney disease 1 (autosomal dominant)	NM_001009944	5101	5410	+
5310	PKD1	polycystic kidney disease 1 (autosomal dominant)	NM_001009944	6301	6960	+
5310	PKD1	polycystic kidney disease 1 (autosomal dominant)	NM_001009944	8751	8910	+
5310	PKD1	polycystic kidney disease 1 (autosomal dominant)	NM_001009944	12981	13270	+
130074	FAM168B	family with sequence similarity 168, member B	NM_001009993	421	660	+
130074	FAM168B	family with sequence similarity 168, member B	NM_001009993	801	1200	+
130074	FAM168B	family with sequence similarity 168, member B	NM_001009993	4791	5030	+
23028	KDM1A	lysine (K)-specific demethylase 1A	NM_001009999	191	340	+
23028	KDM1A	lysine (K)-specific demethylase 1A	NM_001009999	411	790	+
23028	KDM1A	lysine (K)-specific demethylase 1A	NM_001009999	1581	1790	+
23028	KDM1A	lysine (K)-specific demethylase 1A	NM_001009999	2906	3060	+
6194	RPS6	ribosomal protein S6	NM_001010	601	710	+
135293	PM20D2	peptidase M20 domain containing 2	NM_001010853	1254	1480	+
135293	PM20D2	peptidase M20 domain containing 2	NM_001010853	4051	4220	+
149603	RNF187	ring finger protein 187	NM_001010858	1201	1390	+
200205	IBA57	IBA57, iron-sulfur cluster assembly homolog (S. cerevisiae)	NM_001010867	951	1120	+
284611	FAM102B	family with sequence similarity 102, member B	NM_001010883	1151	1410	+
284611	FAM102B	family with sequence similarity 102, member B	NM_001010883	1461	1640	+
55830	GLT8D1	glycosyltransferase 8 domain containing 1	NM_001010983	1805	2310	+
6201	RPS7	ribosomal protein S7	NM_001011	601	710	+
79145	CHCHD7	coiled-coil-helix-coiled-coil-helix domain containing 7	NM_001011667	801	980	+
339287	MSL1	male-specific lethal 1 homolog (Drosophila)	NM_001012241	80	917	+
339287	MSL1	male-specific lethal 1 homolog (Drosophila)	NM_001012241	2631	2780	+
338440	ANO9	anoctamin 9	NM_001012302	2371	2865	+
64400	AKTIP	AKT interacting protein	NM_001012398	1091	1260	+
116113	FOXP4	forkhead box P4	NM_001012426	131	330	+
116113	FOXP4	forkhead box P4	NM_001012426	2341	2740	+
1487	CTBP1	C-terminal binding protein 1	NM_001012614	1634	1990	+
6520	SLC3A2	solute carrier family 3 (amino acid transporter heavy chain), member 2	NM_001012662	523	782	+
6520	SLC3A2	solute carrier family 3 (amino acid transporter heavy chain), member 2	NM_001012662	1870	2308	+
1635	DCTD	dCMP deaminase	NM_001012732	881	1020	+
387921	NHLRC3	NHL repeat containing 3	NM_001012754	1631	2095	+
339324	ZNF260	zinc finger protein 260	NM_001012756	1541	1680	+
348180	CTU2	cytosolic thiouridylase subunit 2 homolog (S. pombe)	NM_001012759	1561	1685	+
91351	DDX60L	DEAD (Asp-Glu-Ala-Asp) box polypeptide 60-like	NM_001012967	3681	3810	+
91351	DDX60L	DEAD (Asp-Glu-Ala-Asp) box polypeptide 60-like	NM_001012967	5791	5920	+
91351	DDX60L	DEAD (Asp-Glu-Ala-Asp) box polypeptide 60-like	NM_001012967	6001	6190	+
139886	SPIN4	spindlin family, member 4	NM_001012968	651	1250	+
144245	ALG10B	ALG10B, alpha-1,2-glucosyltransferase	NM_001013620	644	890	+
391059	FRRS1	ferric-chelate reductase 1	NM_001013660	2351	2576	+
402055	SRRD	SRR1 domain containing	NM_001013694	891	1259	+
440275	EIF2AK4	eukaryotic translation initiation factor 2 alpha kinase 4	NM_001013703	561	690	+
440275	EIF2AK4	eukaryotic translation initiation factor 2 alpha kinase 4	NM_001013703	2001	2200	+
146206	RLTPR	RGD motif, leucine rich repeats, tropomodulin domain and proline-rich containing	NM_001013838	2621	2800	+
146206	RLTPR	RGD motif, leucine rich repeats, tropomodulin domain and proline-rich containing	NM_001013838	3399	3900	+
146206	RLTPR	RGD motif, leucine rich repeats, tropomodulin domain and proline-rich containing	NM_001013838	4261	4452	+
541578	CXorf40B	chromosome X open reading frame 40B	NM_001013845	811	980	+
55208	DCUN1D2	DCN1, defective in cullin neddylation 1, domain containing 2	NM_001014283	2241	2751	+
440836	ODF3B	outer dense fiber of sperm tails 3B	NM_001014440	781	950	+
27005	USP21	ubiquitin specific peptidase 21	NM_001014443	471	850	+
132299	OCIAD2	OCIA domain containing 2	NM_001014446	54	170	+
83460	EMC6	ER membrane protein complex subunit 6	NM_001014764	621	780	+
93611	FBXO44	F-box protein 44	NM_001014765	2131	2280	+
3611	ILK	integrin-linked kinase	NM_001014795	1751	2058	+
9529	BAG5	BCL2-associated athanogene 5	NM_001015049	514	919	+
9529	BAG5	BCL2-associated athanogene 5	NM_001015049	1121	1600	+
9529	BAG5	BCL2-associated athanogene 5	NM_001015049	1641	1850	+
10014	HDAC5	histone deacetylase 5	NM_001015053	51	200	+
10014	HDAC5	histone deacetylase 5	NM_001015053	701	930	+
10014	HDAC5	histone deacetylase 5	NM_001015053	1951	2214	+
548645	DNAJC25	DnaJ (Hsp40) homolog, subfamily C , member 25	NM_001015882	551	731	+
548645	DNAJC25	DnaJ (Hsp40) homolog, subfamily C , member 25	NM_001015882	991	1160	+
8480	RAE1	ribonucleic acid export 1	NM_001015885	1461	1670	+
6206	RPS12	ribosomal protein S12	NM_001016	278	463	+
117584	RFFL	ring finger and FYVE-like domain containing E3 ubiquitin protein ligase	NM_001017368	331	810	+
117584	RFFL	ring finger and FYVE-like domain containing E3 ubiquitin protein ligase	NM_001017368	981	1320	+
117584	RFFL	ring finger and FYVE-like domain containing E3 ubiquitin protein ligase	NM_001017368	1531	1700	+
117584	RFFL	ring finger and FYVE-like domain containing E3 ubiquitin protein ligase	NM_001017368	2921	3090	+
10147	SUGP2	SURP and G patch domain containing 2	NM_001017392	2281	2500	+
10147	SUGP2	SURP and G patch domain containing 2	NM_001017392	4411	4520	+
23023	TMCC1	transmembrane and coiled-coil domain family 1	NM_001017395	1541	1680	+
23023	TMCC1	transmembrane and coiled-coil domain family 1	NM_001017395	1821	1990	+
157570	ESCO2	establishment of sister chromatid cohesion N-acetyltransferase 2	NM_001017420	391	640	+
157570	ESCO2	establishment of sister chromatid cohesion N-acetyltransferase 2	NM_001017420	691	1000	+
3635	INPP5D	inositol polyphosphate-5-phosphatase, 145kDa	NM_001017915	3671	4050	+
3635	INPP5D	inositol polyphosphate-5-phosphatase, 145kDa	NM_001017915	4198	4674	+
3320	HSP90AA1	heat shock protein 90kDa alpha (cytosolic), class A member 1	NM_001017963	664	800	+
3320	HSP90AA1	heat shock protein 90kDa alpha (cytosolic), class A member 1	NM_001017963	931	1050	+
3320	HSP90AA1	heat shock protein 90kDa alpha (cytosolic), class A member 1	NM_001017963	1291	1675	+
3320	HSP90AA1	heat shock protein 90kDa alpha (cytosolic), class A member 1	NM_001017963	2361	2680	+
3320	HSP90AA1	heat shock protein 90kDa alpha (cytosolic), class A member 1	NM_001017963	3481	3580	+
150223	YDJC	YdjC homolog (bacterial)	NM_001017964	941	1260	+
6209	RPS15	ribosomal protein S15	NM_001018	391	530	+
171568	POLR3H	polymerase (RNA) III (DNA directed) polypeptide H (22.9kD)	NM_001018050	1151	1330	+
26135	SERBP1	SERPINE1 mRNA binding protein 1	NM_001018067	311	570	+
26135	SERBP1	SERPINE1 mRNA binding protein 1	NM_001018067	871	1100	+
26135	SERBP1	SERPINE1 mRNA binding protein 1	NM_001018067	1381	1520	+
2908	NR3C1	nuclear receptor subfamily 3, group C, member 1 (glucocorticoid receptor)	NM_001018077	1428	2063	+
2908	NR3C1	nuclear receptor subfamily 3, group C, member 1 (glucocorticoid receptor)	NM_001018077	964	1427	+
2908	NR3C1	nuclear receptor subfamily 3, group C, member 1 (glucocorticoid receptor)	NM_001018077	2401	2560	+
2356	FPGS	folylpolyglutamate synthase	NM_001018078	81	210	+
2356	FPGS	folylpolyglutamate synthase	NM_001018078	1761	1970	+
2356	FPGS	folylpolyglutamate synthase	NM_001018078	2178	2295	+
54832	VPS13C	vacuolar protein sorting 13 homolog C (S. cerevisiae)	NM_001018088	6871	7040	+
54832	VPS13C	vacuolar protein sorting 13 homolog C (S. cerevisiae)	NM_001018088	8181	8340	+
8883	NAE1	NEDD8 activating enzyme E1 subunit 1	NM_001018159	891	1080	+
6210	RPS15A	ribosomal protein S15a	NM_001019	411	531	+
6217	RPS16	ribosomal protein S16	NM_001020	431	573	+
9698	PUM1	pumilio RNA-binding family member 1	NM_001020658	22	650	+
9698	PUM1	pumilio RNA-binding family member 1	NM_001020658	765	1003	+
9698	PUM1	pumilio RNA-binding family member 1	NM_001020658	1981	2130	+
9698	PUM1	pumilio RNA-binding family member 1	NM_001020658	2261	2460	+
9698	PUM1	pumilio RNA-binding family member 1	NM_001020658	3651	3858	+
9698	PUM1	pumilio RNA-binding family member 1	NM_001020658	4051	4197	+
6218	RPS17	ribosomal protein S17	NM_001021_2	191	366	+
6223	RPS19	ribosomal protein S19	NM_001022	661	840	+
390980	ZNF805	zinc finger protein 805	NM_001023563	9371	9550	+
440270	GOLGA8B	golgin A8 family, member B	NM_001023567	111	620	+
440270	GOLGA8B	golgin A8 family, member B	NM_001023567	751	1450	+
6227	RPS21	ribosomal protein S21	NM_001024	281	390	+
375	ARF1	ADP-ribosylation factor 1	NM_001024227	631	890	+
6128	RPL6	ribosomal protein L6	NM_001024662	871	1030	+
91750	LIN52	lin-52 DREAM MuvB core complex component	NM_001024674	411	620	+
5914	RARA	retinoic acid receptor, alpha	NM_001024809	1960	2520	+
6133	RPL9	ribosomal protein L9	NM_001024921	694	829	+
435	ASL	argininosuccinate lyase	NM_001024943	153	330	+
435	ASL	argininosuccinate lyase	NM_001024943	381	480	+
81555	YIPF5	Yip1 domain family, member 5	NM_001024947	1159	1359	+
81555	YIPF5	Yip1 domain family, member 5	NM_001024947	1831	1960	+
10659	CELF2	CUGBP, Elav-like family member 2	NM_001025077	131	320	+
10659	CELF2	CUGBP, Elav-like family member 2	NM_001025077	1611	1879	+
10659	CELF2	CUGBP, Elav-like family member 2	NM_001025077	5571	5900	+
23	ABCF1	ATP-binding cassette, sub-family F (GCN20), member 1	NM_001025091_2	3001	3282	+
4155	MBP	myelin basic protein	NM_001025100	51	410	+
4155	MBP	myelin basic protein	NM_001025100	471	1406	+
4155	MBP	myelin basic protein	NM_001025100	4261	4420	+
7307	U2AF1	U2 small nuclear RNA auxiliary factor 1	NM_001025204	371	550	+
27097	TAF5L	TAF5-like RNA polymerase II, p300/CBP-associated factor (PCAF)-associated factor, 65kDa	NM_001025247	611	840	+
27097	TAF5L	TAF5-like RNA polymerase II, p300/CBP-associated factor (PCAF)-associated factor, 65kDa	NM_001025247	971	1141	+
272	AMPD3	adenosine monophosphate deaminase 3	NM_001025390	571	760	+
272	AMPD3	adenosine monophosphate deaminase 3	NM_001025390	2518	3010	+
257106	ARHGAP30	Rho GTPase activating protein 30	NM_001025598	1781	2020	+
257106	ARHGAP30	Rho GTPase activating protein 30	NM_001025598	2341	2920	+
27106	ARRDC2	arrestin domain containing 2	NM_001025604	1481	1830	+
83478	ARHGAP24	Rho GTPase activating protein 24	NM_001025616	2401	2610	+
83478	ARHGAP24	Rho GTPase activating protein 24	NM_001025616	2671	2840	+
51104	ABHD17B	abhydrolase domain containing 17B	NM_001025780	671	920	+
51104	ABHD17B	abhydrolase domain containing 17B	NM_001025780	1281	1490	+
26140	TTLL3	tubulin tyrosine ligase-like family member 3	NM_001025930	2221	2706	+
26140	TTLL3	tubulin tyrosine ligase-like family member 3	NM_001025930	2893	3130	+
26140	TTLL3	tubulin tyrosine ligase-like family member 3	NM_001025930	3191	3390	+
6231	RPS26	ribosomal protein S26	NM_001029	495	670	+
57713	SFMBT2	Scm-like with four mbt domains 2	NM_001029880	2571	2720	+
57713	SFMBT2	Scm-like with four mbt domains 2	NM_001029880	2881	3080	+
57713	SFMBT2	Scm-like with four mbt domains 2	NM_001029880	3131	3300	+
57713	SFMBT2	Scm-like with four mbt domains 2	NM_001029880	4161	4391	+
57713	SFMBT2	Scm-like with four mbt domains 2	NM_001029880	4671	4900	+
57713	SFMBT2	Scm-like with four mbt domains 2	NM_001029880	5201	5440	+
57713	SFMBT2	Scm-like with four mbt domains 2	NM_001029880	6051	6548	+
441531	PGAM4	phosphoglycerate mutase family member 4	NM_001029891	141	240	+
64745	METTL17	methyltransferase like 17	NM_001029991	541	690	+
64745	METTL17	methyltransferase like 17	NM_001029991	1251	1360	+
6232	RPS27	ribosomal protein S27	NM_001030	231	343	+
163	AP2B1	adaptor-related protein complex 2, beta 1 subunit	NM_001030006	66	430	+
163	AP2B1	adaptor-related protein complex 2, beta 1 subunit	NM_001030006	2461	2660	+
163	AP2B1	adaptor-related protein complex 2, beta 1 subunit	NM_001030006	2941	3300	+
163	AP2B1	adaptor-related protein complex 2, beta 1 subunit	NM_001030006	4842	5387	+
164	AP1G1	adaptor-related protein complex 1, gamma 1 subunit	NM_001030007	31	190	+
164	AP1G1	adaptor-related protein complex 1, gamma 1 subunit	NM_001030007	2711	3319	+
394	ARHGAP5	Rho GTPase activating protein 5	NM_001030055	281	510	+
394	ARHGAP5	Rho GTPase activating protein 5	NM_001030055	551	840	+
394	ARHGAP5	Rho GTPase activating protein 5	NM_001030055	1511	1700	+
394	ARHGAP5	Rho GTPase activating protein 5	NM_001030055	4661	4880	+
6693	SPN	sialophorin	NM_001030288	91	190	+
6693	SPN	sialophorin	NM_001030288	231	450	+
6693	SPN	sialophorin	NM_001030288	471	1157	+
6693	SPN	sialophorin	NM_001030288	1831	2030	+
6693	SPN	sialophorin	NM_001030288	2223	2390	+
6693	SPN	sialophorin	NM_001030288	3291	3456	+
53917	RAB24	RAB24, member RAS oncogene family	NM_001031677	1140	1349	+
864	RUNX3	runt-related transcription factor 3	NM_001031680	1361	1859	+
864	RUNX3	runt-related transcription factor 3	NM_001031680	1971	2440	+
6432	SRSF7	serine/arginine-rich splicing factor 7	NM_001031684	160	300	+
9373	PLAA	phospholipase A2-activating protein	NM_001031689	2311	2580	+
54859	ELP6	elongator acetyltransferase complex subunit 6	NM_001031703	871	1190	+
57222	ERGIC1	endoplasmic reticulum-golgi intermediate compartment (ERGIC) 1	NM_001031711	161	390	+
57222	ERGIC1	endoplasmic reticulum-golgi intermediate compartment (ERGIC) 1	NM_001031711	1551	1770	+
60487	TRMT11	tRNA methyltransferase 11 homolog (S. cerevisiae)	NM_001031712	1401	1636	+
64859	NABP1	nucleic acid binding protein 1	NM_001031716	911	1149	+
79982	DNAJB14	DnaJ (Hsp40) homolog, subfamily B, member 14	NM_001031723	361	510	+
79982	DNAJB14	DnaJ (Hsp40) homolog, subfamily B, member 14	NM_001031723	1010	1440	+
91746	YTHDC1	YTH domain containing 1	NM_001031732	851	1090	+
91746	YTHDC1	YTH domain containing 1	NM_001031732	2391	2545	+
1456	CSNK1G3	casein kinase 1, gamma 3	NM_001031812	485	927	+
1456	CSNK1G3	casein kinase 1, gamma 3	NM_001031812	1261	1440	+
552900	BOLA2	bolA family member 2	NM_001031827	871	1010	+
5257	PHKB	phosphorylase kinase, beta	NM_001031835	43	340	+
5257	PHKB	phosphorylase kinase, beta	NM_001031835	3213	3670	+
5257	PHKB	phosphorylase kinase, beta	NM_001031835	3751	3910	+
5257	PHKB	phosphorylase kinase, beta	NM_001031835	4341	4519	+
5257	PHKB	phosphorylase kinase, beta	NM_001031835	4982	5283	+
7071	KLF10	Kruppel-like factor 10	NM_001032282	881	1240	+
7071	KLF10	Kruppel-like factor 10	NM_001032282	1571	2033	+
7112	TMPO	thymopoietin	NM_001032283	821	980	+
84722	PSRC1	proline/serine-rich coiled-coil 1	NM_001032291	1205	1460	+
8428	STK24	serine/threonine kinase 24	NM_001032296	331	602	+
6240	RRM1	ribonucleotide reductase M1	NM_001033	2511	2842	+
91304	TMEM259	transmembrane protein 259	NM_001033026	1521	1720	+
91304	TMEM259	transmembrane protein 259	NM_001033026	1761	2040	+
51335	NGRN	neugrin, neurite outgrowth associated	NM_001033088	561	710	+
51335	NGRN	neugrin, neurite outgrowth associated	NM_001033088	731	1130	+
51247	PAIP2	poly(A) binding protein interacting protein 2	NM_001033112	191	520	+
51128	SAR1B	secretion associated, Ras related GTPase 1B	NM_001033503	651	946	+
29086	BABAM1	BRISC and BRCA1 A complex member 1	NM_001033549	201	340	+
57649	PHF12	PHD finger protein 12	NM_001033561	831	1000	+
57649	PHF12	PHD finger protein 12	NM_001033561	2011	2260	+
57649	PHF12	PHD finger protein 12	NM_001033561	2371	2520	+
57649	PHF12	PHD finger protein 12	NM_001033561	3191	3310	+
57649	PHF12	PHD finger protein 12	NM_001033561	3531	3640	+
7188	TRAF5	TNF receptor-associated factor 5	NM_001033910	1241	1380	+
7188	TRAF5	TNF receptor-associated factor 5	NM_001033910	1458	1860	+
7188	TRAF5	TNF receptor-associated factor 5	NM_001033910	3371	3741	+
7073	TIAL1	TIA1 cytotoxic granule-associated RNA binding protein-like 1	NM_001033925	1635	1880	+
7311	UBA52	ubiquitin A-52 residue ribosomal protein fusion product 1	NM_001033930	471	590	+
554313	HIST2H4B	histone cluster 2, H4b	NM_001034077	10	176	+
8890	EIF2B4	eukaryotic translation initiation factor 2B, subunit 4 delta, 67kDa	NM_001034116	147	390	+
5393	EXOSC9	exosome component 9	NM_001034194	931	1110	+
5393	EXOSC9	exosome component 9	NM_001034194	1296	1521	+
162073	ITPRIPL2	inositol 1,4,5-trisphosphate receptor interacting protein-like 2	NM_001034841	211	380	+
54463	FAM134B	family with sequence similarity 134, member B	NM_001034850	1121	1623	+
497661	C18orf32	chromosome 18 open reading frame 32	NM_001035005	361	567	+
399665	FAM102A	family with sequence similarity 102, member A	NM_001035254	61	403	+
399665	FAM102A	family with sequence similarity 102, member A	NM_001035254	1591	2010	+
399665	FAM102A	family with sequence similarity 102, member A	NM_001035254	3481	3620	+
11147	HHLA3	HERV-H LTR-associating 3	NM_001036645	621	870	+
116840	CNTROB	centrobin, centrosomal BRCA2 interacting protein	NM_001037144	113	330	+
116840	CNTROB	centrobin, centrosomal BRCA2 interacting protein	NM_001037144	779	1010	+
116840	CNTROB	centrobin, centrosomal BRCA2 interacting protein	NM_001037144	1881	1980	+
221937	FOXK1	forkhead box K1	NM_001037165	2128	2442	+
221937	FOXK1	forkhead box K1	NM_001037165	2541	2870	+
221937	FOXK1	forkhead box K1	NM_001037165	3021	3533	+
221937	FOXK1	forkhead box K1	NM_001037165	3691	4080	+
221937	FOXK1	forkhead box K1	NM_001037165	6541	7320	+
23597	ACOT9	acyl-CoA thioesterase 9	NM_001037171	241	430	+
23597	ACOT9	acyl-CoA thioesterase 9	NM_001037171	1567	1709	+
9453	GGPS1	geranylgeranyl diphosphate synthase 1	NM_001037277	371	630	+
8662	EIF3B	eukaryotic translation initiation factor 3, subunit B	NM_001037283	151	310	+
8662	EIF3B	eukaryotic translation initiation factor 3, subunit B	NM_001037283	2321	2479	+
8662	EIF3B	eukaryotic translation initiation factor 3, subunit B	NM_001037283	2631	2810	+
8662	EIF3B	eukaryotic translation initiation factor 3, subunit B	NM_001037283	2921	3075	+
147166	TRIM16L	tripartite motif containing 16-like	NM_001037330	1291	1440	+
85441	HELZ2	helicase with zinc finger 2, transcriptional coactivator	NM_001037335	3712	3980	+
85441	HELZ2	helicase with zinc finger 2, transcriptional coactivator	NM_001037335	4191	4597	+
85441	HELZ2	helicase with zinc finger 2, transcriptional coactivator	NM_001037335	4811	5000	+
85441	HELZ2	helicase with zinc finger 2, transcriptional coactivator	NM_001037335	5628	6061	+
85441	HELZ2	helicase with zinc finger 2, transcriptional coactivator	NM_001037335	6501	6720	+
85441	HELZ2	helicase with zinc finger 2, transcriptional coactivator	NM_001037335	6891	7190	+
5142	PDE4B	phosphodiesterase 4B, cAMP-specific	NM_001037340	2141	2570	+
22902	RUFY3	RUN and FYVE domain containing 3	NM_001037442	1541	1980	+
22902	RUFY3	RUN and FYVE domain containing 3	NM_001037442	2111	2330	+
22902	RUFY3	RUN and FYVE domain containing 3	NM_001037442	2381	2802	+
8655	DYNLL1	dynein, light chain, LC8-type 1	NM_001037494	451	660	+
728841	NBPF8	neuroblastoma breakpoint family, member 8	NM_001037501	2601	2910	+
728841	NBPF8	neuroblastoma breakpoint family, member 8	NM_001037501	3061	3283	+
79966	SCD5	stearoyl-CoA desaturase 5	NM_001037582	102	330	+
79966	SCD5	stearoyl-CoA desaturase 5	NM_001037582	1201	1395	+
64374	SIL1	SIL1 nucleotide exchange factor	NM_001037633	551	730	+
64374	SIL1	SIL1 nucleotide exchange factor	NM_001037633	1411	1719	+
124565	SLC38A10	solute carrier family 38, member 10	NM_001037984	2661	3160	+
124565	SLC38A10	solute carrier family 38, member 10	NM_001037984	3171	3665	+
124565	SLC38A10	solute carrier family 38, member 10	NM_001037984	4141	4310	+
26502	NARF	nuclear prelamin A recognition factor	NM_001038618	290	450	+
26502	NARF	nuclear prelamin A recognition factor	NM_001038618	1644	1770	+
8706	B3GALNT1	beta-1,3-N-acetylgalactosaminyltransferase 1 (globoside blood group)	NM_001038628	801	980	+
8706	B3GALNT1	beta-1,3-N-acetylgalactosaminyltransferase 1 (globoside blood group)	NM_001038628	1821	1940	+
56882	CDC42SE1	CDC42 small effector 1	NM_001038707	851	1330	+
11078	TRIOBP	TRIO and F-actin binding protein	NM_001039141	6221	6400	+
654483	BOLA2B	bolA family member 2B	NM_001039182	871	1010	+
6430	SRSF5	serine/arginine-rich splicing factor 5	NM_001039465	991	1173	+
2011	MARK2	MAP/microtubule affinity-regulating kinase 2	NM_001039469	231	360	+
2011	MARK2	MAP/microtubule affinity-regulating kinase 2	NM_001039469	2671	3081	+
9870	AREL1	apoptosis resistant E3 ubiquitin protein ligase 1	NM_001039479	3291	3670	+
9870	AREL1	apoptosis resistant E3 ubiquitin protein ligase 1	NM_001039479	4721	4820	+
256356	GK5	glycerol kinase 5 (putative)	NM_001039547	1581	1780	+
8239	USP9X	ubiquitin specific peptidase 9, X-linked	NM_001039590	21	292	+
8239	USP9X	ubiquitin specific peptidase 9, X-linked	NM_001039590	421	680	+
8239	USP9X	ubiquitin specific peptidase 9, X-linked	NM_001039590	2701	2860	+
8239	USP9X	ubiquitin specific peptidase 9, X-linked	NM_001039590	6071	6658	+
8239	USP9X	ubiquitin specific peptidase 9, X-linked	NM_001039590	7821	7920	+
8239	USP9X	ubiquitin specific peptidase 9, X-linked	NM_001039590	8151	8530	+
285148	IAH1	isoamyl acetate-hydrolyzing esterase 1 homolog (S. cerevisiae)	NM_001039613	711	900	+
10419	PRMT5	protein arginine methyltransferase 5	NM_001039619	212	400	+
10419	PRMT5	protein arginine methyltransferase 5	NM_001039619	2391	2590	+
55898	UNC45A	unc-45 homolog A (C. elegans)	NM_001039675	793	950	+
55898	UNC45A	unc-45 homolog A (C. elegans)	NM_001039675	3531	3739	+
54921	CHTF8	CTF8, chromosome transmission fidelity factor 8 homolog (S. cerevisiae)	NM_001039690	311	777	+
54921	CHTF8	CTF8, chromosome transmission fidelity factor 8 homolog (S. cerevisiae)	NM_001039690	2181	2350	+
54921	CHTF8	CTF8, chromosome transmission fidelity factor 8 homolog (S. cerevisiae)	NM_001039690	2431	2870	+
129450	TYW5	tRNA-yW synthesizing protein 5	NM_001039693	1013	1290	+
7216	TRO	trophinin	NM_001039705	461	670	+
7216	TRO	trophinin	NM_001039705	4071	4620	+
80167	C4orf29	chromosome 4 open reading frame 29	NM_001039717	1011	1320	+
643866	CBLN3	cerebellin 3 precursor	NM_001039771	1171	1270	+
998	CDC42	cell division cycle 42	NM_001039802	199	330	+
53344	CHIC1	cysteine-rich hydrophobic domain 1	NM_001039840	6404	6876	+
89839	ARHGAP11B	Rho GTPase activating protein 11B	NM_001039841	1	170	+
113177	IZUMO4	IZUMO family member 4	NM_001039846	761	909	+
2879	GPX4	glutathione peroxidase 4	NM_001039848	851	993	+
29888	STRN4	striatin, calmodulin binding protein 4	NM_001039877	3041	3208	+
148137	PROSER3	proline and serine rich 3	NM_001039887	1651	1900	+
974	CD79B	CD79b molecule, immunoglobulin-associated beta	NM_001039933	911	1259	+
2852	GPER1	G protein-coupled estrogen receptor 1	NM_001039966	2751	2870	+
339231	ARL16	ADP-ribosylation factor-like 16	NM_001040025	711	880	+
963	CD53	CD53 molecule	NM_001040033	41	190	+
963	CD53	CD53 molecule	NM_001040033	781	1390	+
257415	FAM133B	family with sequence similarity 133, member B	NM_001040057	751	920	+
654346	LGALS9C	lectin, galactoside-binding, soluble, 9C	NM_001040078	1531	1710	+
116985	ARAP1	ArfGAP with RhoGAP domain, ankyrin repeat and PH domain 1	NM_001040118	674	1250	+
116985	ARAP1	ArfGAP with RhoGAP domain, ankyrin repeat and PH domain 1	NM_001040118	2931	3130	+
116985	ARAP1	ArfGAP with RhoGAP domain, ankyrin repeat and PH domain 1	NM_001040118	4941	5082	+
54896	PQLC2	PQ loop repeat containing 2	NM_001040125	1821	2030	+
23089	PEG10	paternally expressed 10	NM_001040152	1631	1760	+
23089	PEG10	paternally expressed 10	NM_001040152	2631	2840	+
23089	PEG10	paternally expressed 10	NM_001040152	2941	3200	+
23089	PEG10	paternally expressed 10	NM_001040152	3641	3840	+
23089	PEG10	paternally expressed 10	NM_001040152	3891	4280	+
23089	PEG10	paternally expressed 10	NM_001040152	4941	5145	+
80817	CEP44	centrosomal protein 44kDa	NM_001040157	1891	2040	+
56650	CLDND1	claudin domain containing 1	NM_001040199	621	870	+
64282	PAPD5	PAP associated domain containing 5	NM_001040284	216	630	+
64282	PAPD5	PAP associated domain containing 5	NM_001040284	2071	2370	+
28958	COA3	cytochrome c oxidase assembly factor 3	NM_001040431	411	660	+
51067	YARS2	tyrosyl-tRNA synthetase 2, mitochondrial	NM_001040436	611	720	+
51665	ASB1	ankyrin repeat and SOCS box containing 1	NM_001040445	341	520	+
51665	ASB1	ankyrin repeat and SOCS box containing 1	NM_001040445	1077	1360	+
51665	ASB1	ankyrin repeat and SOCS box containing 1	NM_001040445	6721	6830	+
54545	MTMR12	myotubularin related protein 12	NM_001040446	1843	2610	+
80230	RUFY1	RUN and FYVE domain containing 1	NM_001040451	1151	1270	+
65010	SLC26A6	solute carrier family 26 (anion exchanger), member 6	NM_001040454	2621	2720	+
51092	SIDT2	SID1 transmembrane family, member 2	NM_001040455	2531	2890	+
467	ATF3	activating transcription factor 3	NM_001040619	521	658	+
467	ATF3	activating transcription factor 3	NM_001040619	1011	1360	+
83988	NCALD	neurocalcin delta	NM_001040630	431	980	+
83988	NCALD	neurocalcin delta	NM_001040630	1111	1420	+
83988	NCALD	neurocalcin delta	NM_001040630	1461	1620	+
83988	NCALD	neurocalcin delta	NM_001040630	3561	3670	+
79364	ZXDC	ZXD family zinc finger C	NM_001040653	1631	2350	+
3299	HSF4	heat shock transcription factor 4	NM_001040667	411	630	+
3619	INCENP	inner centromere protein antigens 135/155kDa	NM_001040694	2281	2580	+
23462	HEY1	hes-related family bHLH transcription factor with YRPW motif 1	NM_001040708	501	720	+
23462	HEY1	hes-related family bHLH transcription factor with YRPW motif 1	NM_001040708	961	1237	+
653319	KIAA0895L	KIAA0895-like	NM_001040715	651	910	+
723790	HIST2H2AA4	histone cluster 2, H2aa4	NM_001040874	391	530	+
283871	PGP	phosphoglycolate phosphatase	NM_001042371	861	1002	+
9989	PPP4R1	protein phosphatase 4, regulatory subunit 1	NM_001042388	1461	1690	+
9989	PPP4R1	protein phosphatase 4, regulatory subunit 1	NM_001042388	3004	3667	+
169792	GLIS3	GLIS family zinc finger 3	NM_001042413	2141	2360	+
169792	GLIS3	GLIS family zinc finger 3	NM_001042413	3511	3730	+
55269	PSPC1	paraspeckle component 1	NM_001042414	1121	1330	+
1201	CLN3	ceroid-lipofuscinosis, neuronal 3	NM_001042432	252	440	+
1201	CLN3	ceroid-lipofuscinosis, neuronal 3	NM_001042432	1639	1910	+
831	CAST	calpastatin	NM_001042440	1701	1889	+
831	CAST	calpastatin	NM_001042440	2141	2320	+
5660	PSAP	prosaposin	NM_001042465	271	370	+
5660	PSAP	prosaposin	NM_001042465	961	1130	+
26090	ABHD12	abhydrolase domain containing 12	NM_001042472	1633	2101	+
387119	CEP85L	centrosomal protein 85kDa-like	NM_001042475	911	1398	+
387119	CEP85L	centrosomal protein 85kDa-like	NM_001042475	2791	3070	+
23589	CARHSP1	calcium regulated heat stable protein 1, 24kDa	NM_001042476	320	530	+
23589	CARHSP1	calcium regulated heat stable protein 1, 24kDa	NM_001042476	749	916	+
23589	CARHSP1	calcium regulated heat stable protein 1, 24kDa	NM_001042476	917	1057	+
4763	NF1	neurofibromin 1	NM_001042492	3061	3190	+
4763	NF1	neurofibromin 1	NM_001042492	5233	5650	+
4763	NF1	neurofibromin 1	NM_001042492	5791	5920	+
4763	NF1	neurofibromin 1	NM_001042492	8661	8940	+
4763	NF1	neurofibromin 1	NM_001042492	9021	9120	+
9990	SLC12A6	solute carrier family 12 (potassium/chloride transporter), member 6	NM_001042496	101	450	+
9990	SLC12A6	solute carrier family 12 (potassium/chloride transporter), member 6	NM_001042496	791	973	+
9990	SLC12A6	solute carrier family 12 (potassium/chloride transporter), member 6	NM_001042496	3411	3786	+
9990	SLC12A6	solute carrier family 12 (potassium/chloride transporter), member 6	NM_001042496	3881	4450	+
9990	SLC12A6	solute carrier family 12 (potassium/chloride transporter), member 6	NM_001042496	4661	4890	+
81624	DIAPH3	diaphanous-related formin 3	NM_001042517	3211	3400	+
81624	DIAPH3	diaphanous-related formin 3	NM_001042517	3671	3780	+
84281	C2orf88	chromosome 2 open reading frame 88	NM_001042519	581	785	+
84864	MINA	MYC induced nuclear antigen	NM_001042533	821	940	+
84864	MINA	MYC induced nuclear antigen	NM_001042533	1851	2040	+
84864	MINA	MYC induced nuclear antigen	NM_001042533	2091	2241	+
10479	SLC9A6	solute carrier family 9, subfamily A (NHE6, cation proton antiporter 6), member 6	NM_001042537	1991	2198	+
10479	SLC9A6	solute carrier family 9, subfamily A (NHE6, cation proton antiporter 6), member 6	NM_001042537	4071	4430	+
4150	MAZ	MYC-associated zinc finger protein (purine-binding transcription factor)	NM_001042539	151	420	+
4150	MAZ	MYC-associated zinc finger protein (purine-binding transcription factor)	NM_001042539	1081	1220	+
9637	FEZ2	fasciculation and elongation protein zeta 2 (zygin II)	NM_001042548	661	953	+
25936	NSL1	NSL1, MIS12 kinetochore complex component	NM_001042549	716	1006	+
10592	SMC2	structural maintenance of chromosomes 2	NM_001042550	851	1170	+
10592	SMC2	structural maintenance of chromosomes 2	NM_001042550	1271	1440	+
10592	SMC2	structural maintenance of chromosomes 2	NM_001042550	1551	1810	+
10592	SMC2	structural maintenance of chromosomes 2	NM_001042550	2511	3141	+
10592	SMC2	structural maintenance of chromosomes 2	NM_001042550	5881	6020	+
64772	ENGASE	endo-beta-N-acetylglucosaminidase	NM_001042573	2581	2780	+
64772	ENGASE	endo-beta-N-acetylglucosaminidase	NM_001042573	3811	4120	+
6238	RRBP1	ribosome binding protein 1	NM_001042576	601	840	+
6238	RRBP1	ribosome binding protein 1	NM_001042576	881	980	+
151613	TTC14	tetratricopeptide repeat domain 14	NM_001042601	3461	4220	+
5927	KDM5A	lysine (K)-specific demethylase 5A	NM_001042603	1	130	+
5927	KDM5A	lysine (K)-specific demethylase 5A	NM_001042603	141	310	+
5927	KDM5A	lysine (K)-specific demethylase 5A	NM_001042603	3001	3270	+
5927	KDM5A	lysine (K)-specific demethylase 5A	NM_001042603	3481	3770	+
5927	KDM5A	lysine (K)-specific demethylase 5A	NM_001042603	3811	4010	+
5927	KDM5A	lysine (K)-specific demethylase 5A	NM_001042603	4039	4330	+
5927	KDM5A	lysine (K)-specific demethylase 5A	NM_001042603	4751	5582	+
5927	KDM5A	lysine (K)-specific demethylase 5A	NM_001042603	6241	6390	+
5927	KDM5A	lysine (K)-specific demethylase 5A	NM_001042603	6481	6600	+
22906	TRAK1	trafficking protein, kinesin binding 1	NM_001042646	2561	2930	+
22906	TRAK1	trafficking protein, kinesin binding 1	NM_001042646	2981	3110	+
22906	TRAK1	trafficking protein, kinesin binding 1	NM_001042646	3131	3330	+
257218	SHPRH	SNF2 histone linker PHD RING helicase, E3 ubiquitin protein ligase	NM_001042683	1921	2070	+
2268	FGR	FGR proto-oncogene, Src family tyrosine kinase	NM_001042747	191	430	+
2268	FGR	FGR proto-oncogene, Src family tyrosine kinase	NM_001042747	1821	2465	+
10735	STAG2	stromal antigen 2	NM_001042749	370	767	+
10735	STAG2	stromal antigen 2	NM_001042749	152	338	+
10735	STAG2	stromal antigen 2	NM_001042749	1131	1420	+
10276	NET1	neuroepithelial cell transforming 1	NM_001047160	1755	2015	+
10276	NET1	neuroepithelial cell transforming 1	NM_001047160	2971	3140	+
65979	PHACTR4	phosphatase and actin regulator 4	NM_001048183	841	1170	+
65979	PHACTR4	phosphatase and actin regulator 4	NM_001048183	1311	1604	+
1104	RCC1	regulator of chromosome condensation 1	NM_001048199	251	360	+
1104	RCC1	regulator of chromosome condensation 1	NM_001048199	1411	1670	+
1104	RCC1	regulator of chromosome condensation 1	NM_001048199	1941	2200	+
9985	REC8	REC8 meiotic recombination protein	NM_001048205	1061	1320	+
23155	CLCC1	chloride channel CLIC-like 1	NM_001048210	1271	2013	+
55861	DBNDD2	dysbindin (dystrobrevin binding protein 1) domain containing 2	NM_001048226	991	1250	+
643155	SMIM15	small integral membrane protein 15	NM_001048249	471	708	+
6753	SSTR3	somatostatin receptor 3	NM_001051	931	1080	+
7132	TNFRSF1A	tumor necrosis factor receptor superfamily, member 1A	NM_001065	1501	1800	+
7132	TNFRSF1A	tumor necrosis factor receptor superfamily, member 1A	NM_001065	2121	2220	+
7133	TNFRSF1B	tumor necrosis factor receptor superfamily, member 1B	NM_001066	3021	3648	+
7153	TOP2A	topoisomerase (DNA) II alpha 170kDa	NM_001067	3751	4127	+
7153	TOP2A	topoisomerase (DNA) II alpha 170kDa	NM_001067	4691	4899	+
7153	TOP2A	topoisomerase (DNA) II alpha 170kDa	NM_001067	5411	5570	+
7155	TOP2B	topoisomerase (DNA) II beta 180kDa	NM_001068	3981	4220	+
7283	TUBG1	tubulin, gamma 1	NM_001070	1631	1942	+
55902	ACSS2	acyl-CoA synthetase short-chain family member 2	NM_001076552	67	207	+
55902	ACSS2	acyl-CoA synthetase short-chain family member 2	NM_001076552	2391	2600	+
9057	SLC7A6	solute carrier family 7 (amino acid transporter light chain, y+L system), member 6	NM_001076785	1773	2026	+
9057	SLC7A6	solute carrier family 7 (amino acid transporter light chain, y+L system), member 6	NM_001076785	2591	2808	+
9057	SLC7A6	solute carrier family 7 (amino acid transporter light chain, y+L system), member 6	NM_001076785	3021	3490	+
9057	SLC7A6	solute carrier family 7 (amino acid transporter light chain, y+L system), member 6	NM_001076785	4411	4598	+
9057	SLC7A6	solute carrier family 7 (amino acid transporter light chain, y+L system), member 6	NM_001076785	5611	5990	+
79832	QSER1	glutamine and serine rich 1	NM_001076786	3891	4040	+
79832	QSER1	glutamine and serine rich 1	NM_001076786	5571	5690	+
7367	UGT2B17	UDP glucuronosyltransferase 2 family, polypeptide B17	NM_001077	51	270	+
7367	UGT2B17	UDP glucuronosyltransferase 2 family, polypeptide B17	NM_001077	381	620	+
7367	UGT2B17	UDP glucuronosyltransferase 2 family, polypeptide B17	NM_001077	1541	1770	+
80818	ZNF436	zinc finger protein 436	NM_001077195	2251	2420	+
79065	ATG9A	autophagy related 9A	NM_001077198	1001	1170	+
79065	ATG9A	autophagy related 9A	NM_001077198	2871	3190	+
56928	SPPL2B	signal peptide peptidase like 2B	NM_001077238	1656	2300	+
56928	SPPL2B	signal peptide peptidase like 2B	NM_001077238	2347	2638	+
55147	RBM23	RNA binding motif protein 23	NM_001077351	251	470	+
55147	RBM23	RNA binding motif protein 23	NM_001077351	1501	1990	+
51611	DPH5	diphthamide biosynthesis 5	NM_001077394	731	1090	+
2778	GNAS	GNAS complex locus	NM_001077490	3551	3730	+
64419	MTMR14	myotubularin related protein 14	NM_001077525	2201	2520	+
414189	AGAP6	ArfGAP with GTPase domain, ankyrin repeat and PH domain 6	NM_001077665	1461	1640	+
6426	SRSF1	serine/arginine-rich splicing factor 1	NM_001078166	1621	1720	+
6426	SRSF1	serine/arginine-rich splicing factor 1	NM_001078166	2591	2971	+
6426	SRSF1	serine/arginine-rich splicing factor 1	NM_001078166	4191	4330	+
2030	SLC29A1	solute carrier family 29 (equilibrative nucleoside transporter), member 1	NM_001078177	1831	2140	+
2030	SLC29A1	solute carrier family 29 (equilibrative nucleoside transporter), member 1	NM_001078177	2271	2428	+
8881	CDC16	cell division cycle 16	NM_001078645	1841	2289	+
122553	TRAPPC6B	trafficking protein particle complex 6B	NM_001079537	3001	3170	+
221092	HNRNPUL2	heterogeneous nuclear ribonucleoprotein U-like 2	NM_001079559	215	543	+
2118	ETV4	ets variant 4	NM_001079675	621	750	+
2118	ETV4	ets variant 4	NM_001079675	2101	2290	+
6672	SP100	SP100 nuclear antigen	NM_001080391	1741	1920	+
57189	KIAA1147	KIAA1147	NM_001080392_2	981	1483	+
57189	KIAA1147	KIAA1147	NM_001080392_2	2191	2564	+
57189	KIAA1147	KIAA1147	NM_001080392_2	4281	4518	+
57189	KIAA1147	KIAA1147	NM_001080392_2	5311	5481	+
57189	KIAA1147	KIAA1147	NM_001080392_2	6593	6890	+
23514	SPIDR	scaffolding protein involved in DNA repair	NM_001080394	1811	1970	+
23514	SPIDR	scaffolding protein involved in DNA repair	NM_001080394	2751	2971	+
23392	KIAA0368	KIAA0368	NM_001080398	1321	1500	+
23392	KIAA0368	KIAA0368	NM_001080398	4181	4320	+
23392	KIAA0368	KIAA0368	NM_001080398	5451	5710	+
23392	KIAA0368	KIAA0368	NM_001080398	5943	6167	+
150726	FBXO41	F-box protein 41	NM_001080410	641	946	+
150726	FBXO41	F-box protein 41	NM_001080410	2561	2968	+
150726	FBXO41	F-box protein 41	NM_001080410	6711	6890	+
253461	ZBTB38	zinc finger and BTB domain containing 38	NM_001080412	4401	4550	+
440193	CCDC88C	coiled-coil domain containing 88C	NM_001080414	2081	2260	+
440193	CCDC88C	coiled-coil domain containing 88C	NM_001080414	2481	2730	+
440193	CCDC88C	coiled-coil domain containing 88C	NM_001080414	5575	5830	+
440193	CCDC88C	coiled-coil domain containing 88C	NM_001080414	5361	5567	+
440193	CCDC88C	coiled-coil domain containing 88C	NM_001080414	6091	6380	+
23350	U2SURP	U2 snRNP-associated SURP domain containing	NM_001080415	231	783	+
23350	U2SURP	U2 snRNP-associated SURP domain containing	NM_001080415	971	1160	+
23350	U2SURP	U2 snRNP-associated SURP domain containing	NM_001080415	1181	1410	+
23350	U2SURP	U2 snRNP-associated SURP domain containing	NM_001080415	1681	1810	+
23350	U2SURP	U2 snRNP-associated SURP domain containing	NM_001080415	2579	3193	+
23135	KDM6B	lysine (K)-specific demethylase 6B	NM_001080424	2071	2450	+
23135	KDM6B	lysine (K)-specific demethylase 6B	NM_001080424	2611	3000	+
23135	KDM6B	lysine (K)-specific demethylase 6B	NM_001080424	3119	3510	+
57662	CAMSAP3	calmodulin regulated spectrin-associated protein family, member 3	NM_001080429	2211	2420	+
79068	FTO	fat mass and obesity associated	NM_001080432	821	970	+
123720	WHAMM	WAS protein homolog associated with actin, golgi membranes and microtubules	NM_001080435	2351	2592	+
56927	GPR108	G protein-coupled receptor 108	NM_001080452	65	230	+
56927	GPR108	G protein-coupled receptor 108	NM_001080452	961	1100	+
56927	GPR108	G protein-coupled receptor 108	NM_001080452	1801	1923	+
26173	INTS1	integrator complex subunit 1	NM_001080453	921	1180	+
26173	INTS1	integrator complex subunit 1	NM_001080453	3961	4150	+
26173	INTS1	integrator complex subunit 1	NM_001080453	6842	6970	+
23403	FBXO46	F-box protein 46	NM_001080469	1291	1390	+
90874	ZNF697	zinc finger protein 697	NM_001080470	111	370	+
90874	ZNF697	zinc finger protein 697	NM_001080470	541	750	+
154141	MBOAT1	membrane bound O-acyltransferase domain containing 1	NM_001080480	1575	1977	+
154141	MBOAT1	membrane bound O-acyltransferase domain containing 1	NM_001080480	2424	2765	+
85015	USP45	ubiquitin specific peptidase 45	NM_001080481	2091	2310	+
10838	ZNF275	zinc finger protein 275	NM_001080485	401	760	+
10838	ZNF275	zinc finger protein 275	NM_001080485	1141	1240	+
10838	ZNF275	zinc finger protein 275	NM_001080485	1261	1530	+
10838	ZNF275	zinc finger protein 275	NM_001080485	3221	3330	+
10838	ZNF275	zinc finger protein 275	NM_001080485	3381	3640	+
10838	ZNF275	zinc finger protein 275	NM_001080485	5261	5420	+
10838	ZNF275	zinc finger protein 275	NM_001080485	5461	5670	+
84629	TNRC18	trinucleotide repeat containing 18	NM_001080495	931	1290	+
84629	TNRC18	trinucleotide repeat containing 18	NM_001080495	1539	1810	+
84629	TNRC18	trinucleotide repeat containing 18	NM_001080495	2021	2180	+
84629	TNRC18	trinucleotide repeat containing 18	NM_001080495	3901	4430	+
84629	TNRC18	trinucleotide repeat containing 18	NM_001080495	7461	8020	+
9827	RGP1	RGP1 retrograde golgi transport homolog (S. cerevisiae)	NM_001080496	1271	1510	+
79064	TMEM223	transmembrane protein 223	NM_001080501	468	810	+
84747	UNC119B	unc-119 homolog B (C. elegans)	NM_001080533	21	190	+
84747	UNC119B	unc-119 homolog B (C. elegans)	NM_001080533	4091	4250	+
58509	CACTIN	cactin, spliceosome C complex subunit	NM_001080543	2861	3000	+
6688	SPI1	Spi-1 proto-oncogene	NM_001080547	81	180	+
6688	SPI1	Spi-1 proto-oncogene	NM_001080547	961	1290	+
4641	MYO1C	myosin IC	NM_001080779	3371	3770	+
4641	MYO1C	myosin IC	NM_001080779	3901	4040	+
4641	MYO1C	myosin IC	NM_001080779	4171	4780	+
90416	C15orf57	chromosome 15 open reading frame 57	NM_001080791	851	1200	+
144404	TMEM120B	transmembrane protein 120B	NM_001080825	1101	1380	+
157285	SGK223	homolog of rat pragma of Rnd2	NM_001080826	785	1020	+
157285	SGK223	homolog of rat pragma of Rnd2	NM_001080826	2901	3060	+
23210	JMJD6	jumonji domain containing 6	NM_001081461	451	780	+
10482	NXF1	nuclear RNA export factor 1	NM_001081491	1933	2140	+
10482	NXF1	nuclear RNA export factor 1	NM_001081491	3991	4090	+
57187	THOC2	THO complex 2	NM_001081550	951	1143	+
57187	THOC2	THO complex 2	NM_001081550	1671	1770	+
57187	THOC2	THO complex 2	NM_001081550	2011	2198	+
57187	THOC2	THO complex 2	NM_001081550	2721	2900	+
57187	THOC2	THO complex 2	NM_001081550	4213	4850	+
146691	TOM1L2	target of myb1-like 2 (chicken)	NM_001082968	49	160	+
146691	TOM1L2	target of myb1-like 2 (chicken)	NM_001082968	1771	2186	+
146691	TOM1L2	target of myb1-like 2 (chicken)	NM_001082968	2291	2870	+
146691	TOM1L2	target of myb1-like 2 (chicken)	NM_001082968	3171	3280	+
2820	GPD2	glycerol-3-phosphate dehydrogenase 2 (mitochondrial)	NM_001083112	2417	2653	+
2820	GPD2	glycerol-3-phosphate dehydrogenase 2 (mitochondrial)	NM_001083112	3641	3800	+
89846	FGD3	FYVE, RhoGEF and PH domain containing 3	NM_001083536	791	960	+
89846	FGD3	FYVE, RhoGEF and PH domain containing 3	NM_001083536	2791	3040	+
79903	NAA60	N(alpha)-acetyltransferase 60, NatF catalytic subunit	NM_001083601	1301	1560	+
5727	PTCH1	patched 1	NM_001083602	464	690	+
5727	PTCH1	patched 1	NM_001083602	2541	2770	+
5727	PTCH1	patched 1	NM_001083602	3111	3280	+
5727	PTCH1	patched 1	NM_001083602	4051	4786	+
124454	EARS2	glutamyl-tRNA synthetase 2, mitochondrial	NM_001083614	1541	1951	+
124454	EARS2	glutamyl-tRNA synthetase 2, mitochondrial	NM_001083614	2261	2461	+
9923	ZBTB40	zinc finger and BTB domain containing 40	NM_001083621	2631	2730	+
9923	ZBTB40	zinc finger and BTB domain containing 40	NM_001083621	5901	6020	+
29966	STRN3	striatin, calmodulin binding protein 3	NM_001083893	2581	2750	+
63892	THADA	thyroid adenoma associated	NM_001083953	1421	1820	+
63892	THADA	thyroid adenoma associated	NM_001083953	6017	6278	+
79027	ZNF655	zinc finger protein 655	NM_001083956	681	1040	+
79027	ZNF655	zinc finger protein 655	NM_001083956	1461	1690	+
79027	ZNF655	zinc finger protein 655	NM_001083956	1811	2237	+
284403	WDR62	WD repeat domain 62	NM_001083961	3861	4060	+
6925	TCF4	transcription factor 4	NM_001083962	2771	2977	+
8985	PLOD3	procollagen-lysine, 2-oxoglutarate 5-dioxygenase 3	NM_001084	701	815	+
8985	PLOD3	procollagen-lysine, 2-oxoglutarate 5-dioxygenase 3	NM_001084	2511	2690	+
790955	UQCC3	ubiquinol-cytochrome c reductase complex assembly factor 3	NM_001085372	431	615	+
4163	MCC	mutated in colorectal cancers	NM_001085377	3411	3720	+
133686	NADK2	NAD kinase 2, mitochondrial	NM_001085411	1391	1640	+
28964	GIT1	G protein-coupled receptor kinase interacting ArfGAP 1	NM_001085454	2441	2660	+
1500	CTNND1	catenin (cadherin-associated protein), delta 1	NM_001085458	56	220	+
1500	CTNND1	catenin (cadherin-associated protein), delta 1	NM_001085458	981	1500	+
1500	CTNND1	catenin (cadherin-associated protein), delta 1	NM_001085458	1761	1940	+
1500	CTNND1	catenin (cadherin-associated protein), delta 1	NM_001085458	3431	3750	+
1500	CTNND1	catenin (cadherin-associated protein), delta 1	NM_001085458	3791	4190	+
1500	CTNND1	catenin (cadherin-associated protein), delta 1	NM_001085458	4211	4430	+
114803	MYSM1	Myb-like, SWIRM and MPN domains 1	NM_001085487	481	1130	+
114803	MYSM1	Myb-like, SWIRM and MPN domains 1	NM_001085487	1491	1590	+
114803	MYSM1	Myb-like, SWIRM and MPN domains 1	NM_001085487	2311	2551	+
114803	MYSM1	Myb-like, SWIRM and MPN domains 1	NM_001085487	5091	5190	+
114803	MYSM1	Myb-like, SWIRM and MPN domains 1	NM_001085487	6031	6160	+
14	AAMP	angio-associated, migratory cell protein	NM_001087	66	400	+
47	ACLY	ATP citrate lyase	NM_001096	34	150	+
47	ACLY	ATP citrate lyase	NM_001096	1351	1710	+
47	ACLY	ATP citrate lyase	NM_001096	3011	3200	+
47	ACLY	ATP citrate lyase	NM_001096	3471	3700	+
653519	GPR89A	G protein-coupled receptor 89A	NM_001097613	1736	2003	+
653519	GPR89A	G protein-coupled receptor 89A	NM_001097613	1481	1690	+
548644	POLR2J3	polymerase (RNA) II (DNA directed) polypeptide J3	NM_001097615	53	510	+
2650	GCNT1	glucosaminyl (N-acetyl) transferase 1, core 2	NM_001097634	861	1020	+
2650	GCNT1	glucosaminyl (N-acetyl) transferase 1, core 2	NM_001097634	1631	1820	+
2650	GCNT1	glucosaminyl (N-acetyl) transferase 1, core 2	NM_001097634	1991	2290	+
50	ACO2	aconitase 2, mitochondrial	NM_001098	1641	1750	+
50	ACO2	aconitase 2, mitochondrial	NM_001098	2373	2635	+
3185	HNRNPF	heterogeneous nuclear ribonucleoprotein F	NM_001098208	553	860	+
3185	HNRNPF	heterogeneous nuclear ribonucleoprotein F	NM_001098208	1031	1250	+
3157	HMGCS1	3-hydroxy-3-methylglutaryl-CoA synthase 1 (soluble)	NM_001098272	313	623	+
3157	HMGCS1	3-hydroxy-3-methylglutaryl-CoA synthase 1 (soluble)	NM_001098272	1661	1812	+
3157	HMGCS1	3-hydroxy-3-methylglutaryl-CoA synthase 1 (soluble)	NM_001098272	2261	2490	+
1314	COPA	coatomer protein complex, subunit alpha	NM_001098398	304	480	+
1314	COPA	coatomer protein complex, subunit alpha	NM_001098398	2901	3170	+
1314	COPA	coatomer protein complex, subunit alpha	NM_001098398	4541	4770	+
49854	ZBTB21	zinc finger and BTB domain containing 21	NM_001098402	33	150	+
49854	ZBTB21	zinc finger and BTB domain containing 21	NM_001098402	381	490	+
49854	ZBTB21	zinc finger and BTB domain containing 21	NM_001098402	571	900	+
49854	ZBTB21	zinc finger and BTB domain containing 21	NM_001098402	991	1170	+
49854	ZBTB21	zinc finger and BTB domain containing 21	NM_001098402	2061	2240	+
49854	ZBTB21	zinc finger and BTB domain containing 21	NM_001098402	3121	3490	+
6603	SMARCD2	SWI/SNF related, matrix associated, actin dependent regulator of chromatin, subfamily d, member 2	NM_001098426	52	350	+
6603	SMARCD2	SWI/SNF related, matrix associated, actin dependent regulator of chromatin, subfamily d, member 2	NM_001098426	2661	2760	+
3134	HLA-F	major histocompatibility complex, class I, F	NM_001098479_4	131	250	+
10521	DDX17	DEAD (Asp-Glu-Ala-Asp) box helicase 17	NM_001098504	1515	2037	+
10521	DDX17	DEAD (Asp-Glu-Ala-Asp) box helicase 17	NM_001098504	2241	2383	+
10521	DDX17	DEAD (Asp-Glu-Ala-Asp) box helicase 17	NM_001098504	4521	4740	+
8078	USP5	ubiquitin specific peptidase 5 (isopeptidase T)	NM_001098536	41	150	+
8078	USP5	ubiquitin specific peptidase 5 (isopeptidase T)	NM_001098536	1501	1650	+
8078	USP5	ubiquitin specific peptidase 5 (isopeptidase T)	NM_001098536	2581	2930	+
8078	USP5	ubiquitin specific peptidase 5 (isopeptidase T)	NM_001098536	3091	3190	+
7009	TMBIM6	transmembrane BAX inhibitor motif containing 6	NM_001098576	438	585	+
7009	TMBIM6	transmembrane BAX inhibitor motif containing 6	NM_001098576	1191	1380	+
7009	TMBIM6	transmembrane BAX inhibitor motif containing 6	NM_001098576	1391	1640	+
25912	C1orf43	chromosome 1 open reading frame 43	NM_001098616	981	1374	+
25912	C1orf43	chromosome 1 open reading frame 43	NM_001098616	1741	1873	+
3663	IRF5	interferon regulatory factor 5	NM_001098627	1660	2140	+
254225	RNF169	ring finger protein 169	NM_001098638	1131	1270	+
254225	RNF169	ring finger protein 169	NM_001098638	1481	1798	+
254225	RNF169	ring finger protein 169	NM_001098638	7542	7818	+
11102	RPP14	ribonuclease P/MRP 14kDa subunit	NM_001098783	931	1287	+
125228	FAM210A	family with sequence similarity 210, member A	NM_001098801	371	680	+
125228	FAM210A	family with sequence similarity 210, member A	NM_001098801	1052	1312	+
125476	INO80C	INO80 complex subunit C	NM_001098817	731	930	+
641649	TMEM91	transmembrane protein 91	NM_001098821	891	1070	+
84923	FAM104A	family with sequence similarity 104, member A	NM_001098832	2021	2280	+
643641	ZNF862	zinc finger protein 862	NM_001099220	641	1083	+
643641	ZNF862	zinc finger protein 862	NM_001099220	1491	1670	+
643641	ZNF862	zinc finger protein 862	NM_001099220	2941	3140	+
643641	ZNF862	zinc finger protein 862	NM_001099220	3581	3810	+
403341	ZBTB34	zinc finger and BTB domain containing 34	NM_001099270	121	300	+
403341	ZBTB34	zinc finger and BTB domain containing 34	NM_001099270	621	970	+
403341	ZBTB34	zinc finger and BTB domain containing 34	NM_001099270	1038	1290	+
403341	ZBTB34	zinc finger and BTB domain containing 34	NM_001099270	1311	1623	+
5757	PTMA	prothymosin, alpha	NM_001099285	281	520	+
8910	SGCE	sarcoglycan, epsilon	NM_001099401	60	223	+
8910	SGCE	sarcoglycan, epsilon	NM_001099401	1412	1550	+
8812	CCNK	cyclin K	NM_001099402	931	1310	+
254102	EHBP1L1	EH domain binding protein 1-like 1	NM_001099409	1081	1210	+
254102	EHBP1L1	EH domain binding protein 1-like 1	NM_001099409	1301	1510	+
254102	EHBP1L1	EH domain binding protein 1-like 1	NM_001099409	2811	2940	+
254102	EHBP1L1	EH domain binding protein 1-like 1	NM_001099409	3851	4010	+
7994	KAT6A	K(lysine) acetyltransferase 6A	NM_001099412	321	980	+
7994	KAT6A	K(lysine) acetyltransferase 6A	NM_001099412	3201	3450	+
7994	KAT6A	K(lysine) acetyltransferase 6A	NM_001099412	4122	4370	+
7994	KAT6A	K(lysine) acetyltransferase 6A	NM_001099412	4421	4600	+
7994	KAT6A	K(lysine) acetyltransferase 6A	NM_001099412	5791	6090	+
7994	KAT6A	K(lysine) acetyltransferase 6A	NM_001099412	6211	6627	+
100101267	POM121C	POM121 transmembrane nucleoporin C	NM_001099415	2031	2270	+
100101267	POM121C	POM121 transmembrane nucleoporin C	NM_001099415	2591	2730	+
100101267	POM121C	POM121 transmembrane nucleoporin C	NM_001099415	2861	2990	+
54828	BCAS3	breast carcinoma amplified sequence 3	NM_001099432	2931	3150	+
200916	RPL22L1	ribosomal protein L22-like 1	NM_001099645	431	553	+
728689	EIF3CL	eukaryotic translation initiation factor 3, subunit C-like	NM_001099661	761	1139	+
728689	EIF3CL	eukaryotic translation initiation factor 3, subunit C-like	NM_001099661	2781	2907	+
375743	PTAR1	protein prenyltransferase alpha subunit repeat containing 1	NM_001099666	958	1216	+
375743	PTAR1	protein prenyltransferase alpha subunit repeat containing 1	NM_001099666	671	947	+
375743	PTAR1	protein prenyltransferase alpha subunit repeat containing 1	NM_001099666	9381	9510	+
116064	LRRC58	leucine rich repeat containing 58	NM_001099678	1141	1340	+
727866	FAM156B	family with sequence similarity 156, member B	NM_001099684	991	1250	+
143244	EIF5AL1	eukaryotic translation initiation factor 5A-like 1	NM_001099692	731	840	+
54620	FBXL19	F-box and leucine-rich repeat protein 19	NM_001099784	1231	1330	+
54620	FBXL19	F-box and leucine-rich repeat protein 19	NM_001099784	2941	3490	+
3384	ICAM2	intercellular adhesion molecule 2	NM_001099786	1185	1330	+
9699	RIMS2	regulating synaptic membrane exocytosis 2	NM_001100117	4641	4870	+
23244	PDS5A	PDS5 cohesin associated factor A	NM_001100399	421	720	+
23244	PDS5A	PDS5 cohesin associated factor A	NM_001100399	1681	1860	+
23244	PDS5A	PDS5 cohesin associated factor A	NM_001100399	2611	2810	+
23244	PDS5A	PDS5 cohesin associated factor A	NM_001100399	4071	4911	+
54149	C21orf91	chromosome 21 open reading frame 91	NM_001100420	461	700	+
54149	C21orf91	chromosome 21 open reading frame 91	NM_001100420	891	1050	+
54542	RC3H2	ring finger and CCCH-type domains 2	NM_001100588	2171	2300	+
54542	RC3H2	ring finger and CCCH-type domains 2	NM_001100588	3641	3873	+
91768	CABLES1	Cdk5 and Abl enzyme substrate 1	NM_001100619	1	430	+
91768	CABLES1	Cdk5 and Abl enzyme substrate 1	NM_001100619	1861	2280	+
100113407	TMEM170B	transmembrane protein 170B	NM_001100829	321	700	+
254295	PHYHD1	phytanoyl-CoA dioxygenase domain containing 1	NM_001100876	1991	2130	+
400410	ST20	suppressor of tumorigenicity 20	NM_001100879	821	951	+
653820	FAM72B	family with sequence similarity 72, member B	NM_001100910	40	528	+
60	ACTB	actin, beta	NM_001101	21	170	+
60	ACTB	actin, beta	NM_001101	1101	1500	+
30827	CXXC1	CXXC finger protein 1	NM_001101654	628	790	+
30827	CXXC1	CXXC finger protein 1	NM_001101654	941	1150	+
30827	CXXC1	CXXC finger protein 1	NM_001101654	1661	1852	+
30827	CXXC1	CXXC finger protein 1	NM_001101654	2691	2960	+
51317	PHF21A	PHD finger protein 21A	NM_001101802	251	370	+
51317	PHF21A	PHD finger protein 21A	NM_001101802	401	540	+
51317	PHF21A	PHD finger protein 21A	NM_001101802	2441	2840	+
80143	SIKE1	suppressor of IKBKE 1	NM_001102396	641	830	+
10236	HNRNPR	heterogeneous nuclear ribonucleoprotein R	NM_001102398	1643	2154	+
58488	PCTP	phosphatidylcholine transfer protein	NM_001102402	791	1010	+
7763	ZFAND5	zinc finger, AN1-type domain 5	NM_001102420	1251	1370	+
7763	ZFAND5	zinc finger, AN1-type domain 5	NM_001102420	1891	2159	+
84513	PPAPDC1B	phosphatidic acid phosphatase type 2 domain containing 1B	NM_001102559	1721	2025	+
90338	ZNF160	zinc finger protein 160	NM_001102603	901	1160	+
90338	ZNF160	zinc finger protein 160	NM_001102603	2421	2530	+
54726	OTUD4	OTU deubiquitinase 4	NM_001102653	1411	1650	+
54726	OTUD4	OTU deubiquitinase 4	NM_001102653	2624	3541	+
54726	OTUD4	OTU deubiquitinase 4	NM_001102653	2139	2527	+
91607	SLFN11	schlafen family member 11	NM_001104587	1191	1400	+
91607	SLFN11	schlafen family member 11	NM_001104587	1871	2120	+
91607	SLFN11	schlafen family member 11	NM_001104587	2501	2660	+
91607	SLFN11	schlafen family member 11	NM_001104587	2721	2970	+
91607	SLFN11	schlafen family member 11	NM_001104587	3021	3170	+
55007	FAM118A	family with sequence similarity 118, member A	NM_001104595	1789	2092	+
55186	SLC25A36	solute carrier family 25 (pyrimidine nucleotide carrier), member 36	NM_001104647	1016	1328	+
9070	ASH2L	ash2 (absent, small, or homeotic)-like (Drosophila)	NM_001105214	991	1150	+
9070	ASH2L	ash2 (absent, small, or homeotic)-like (Drosophila)	NM_001105214	1971	2190	+
9765	ZFYVE16	zinc finger, FYVE domain containing 16	NM_001105251	551	650	+
7701	ZNF142	zinc finger protein 142	NM_001105537	5531	5690	+
8525	DGKZ	diacylglycerol kinase, zeta	NM_001105540	2971	3070	+
8525	DGKZ	diacylglycerol kinase, zeta	NM_001105540	3361	3816	+
8525	DGKZ	diacylglycerol kinase, zeta	NM_001105540	3901	4074	+
9473	THEMIS2	thymocyte selection associated family member 2	NM_001105556	1991	2200	+
9473	THEMIS2	thymocyte selection associated family member 2	NM_001105556	2381	2600	+
10277	UBE4B	ubiquitination factor E4B	NM_001105562	230	680	+
10277	UBE4B	ubiquitination factor E4B	NM_001105562	4461	4660	+
10277	UBE4B	ubiquitination factor E4B	NM_001105562	4671	4860	+
10277	UBE4B	ubiquitination factor E4B	NM_001105562	4981	5160	+
390916	NUDT19	nudix (nucleoside diphosphate linked moiety X)-type motif 19	NM_001105570	223	410	+
390916	NUDT19	nudix (nucleoside diphosphate linked moiety X)-type motif 19	NM_001105570	951	1160	+
200933	FBXO45	F-box protein 45	NM_001105573	791	1160	+
101	ADAM8	ADAM metallopeptidase domain 8	NM_001109	81	180	+
101	ADAM8	ADAM metallopeptidase domain 8	NM_001109	2671	2820	+
101	ADAM8	ADAM metallopeptidase domain 8	NM_001109	2888	3140	+
283450	HECTD4	HECT domain containing E3 ubiquitin protein ligase 4	NM_001109662	361	590	+
283450	HECTD4	HECT domain containing E3 ubiquitin protein ligase 4	NM_001109662	9571	10000	+
283450	HECTD4	HECT domain containing E3 ubiquitin protein ligase 4	NM_001109662	10221	10380	+
283450	HECTD4	HECT domain containing E3 ubiquitin protein ligase 4	NM_001109662	10561	10810	+
283450	HECTD4	HECT domain containing E3 ubiquitin protein ligase 4	NM_001109662	11311	11530	+
283450	HECTD4	HECT domain containing E3 ubiquitin protein ligase 4	NM_001109662	14551	14720	+
283450	HECTD4	HECT domain containing E3 ubiquitin protein ligase 4	NM_001109662	14949	15110	+
102	ADAM10	ADAM metallopeptidase domain 10	NM_001110	2621	3124	+
2316	FLNA	filamin A, alpha	NM_001110556	291	450	+
2316	FLNA	filamin A, alpha	NM_001110556	781	910	+
2316	FLNA	filamin A, alpha	NM_001110556	3541	3930	+
2316	FLNA	filamin A, alpha	NM_001110556	8211	8430	+
54	ACP5	acid phosphatase 5, tartrate resistant	NM_001111035	1131	1551	+
5141	PDE4A	phosphodiesterase 4A, cAMP-specific	NM_001111307	2036	2459	+
5141	PDE4A	phosphodiesterase 4A, cAMP-specific	NM_001111307	2541	2903	+
79039	DDX54	DEAD (Asp-Glu-Ala-Asp) box polypeptide 54	NM_001111322	1911	2030	+
79039	DDX54	DEAD (Asp-Glu-Ala-Asp) box polypeptide 54	NM_001111322	2591	3040	+
23272	FAM208A	family with sequence similarity 208, member A	NM_001112736	281	480	+
23272	FAM208A	family with sequence similarity 208, member A	NM_001112736	2061	2260	+
23272	FAM208A	family with sequence similarity 208, member A	NM_001112736	2424	2700	+
23272	FAM208A	family with sequence similarity 208, member A	NM_001112736	3081	3780	+
23272	FAM208A	family with sequence similarity 208, member A	NM_001112736	4626	5220	+
23272	FAM208A	family with sequence similarity 208, member A	NM_001112736	5301	5428	+
100131187	TSTD1	thiosulfate sulfurtransferase (rhodanese)-like domain containing 1	NM_001113205	541	662	+
100134934	TEN1	TEN1 CST complex subunit	NM_001113324	581	990	+
55215	FANCI	Fanconi anemia, complementation group I	NM_001113378	31	150	+
55215	FANCI	Fanconi anemia, complementation group I	NM_001113378	2081	2340	+
55215	FANCI	Fanconi anemia, complementation group I	NM_001113378	3933	4164	+
55215	FANCI	Fanconi anemia, complementation group I	NM_001113378	4438	4599	+
8874	ARHGEF7	Rho guanine nucleotide exchange factor (GEF) 7	NM_001113511	401	505	+
8874	ARHGEF7	Rho guanine nucleotide exchange factor (GEF) 7	NM_001113511	2021	2360	+
165631	PARP15	poly (ADP-ribose) polymerase family, member 15	NM_001113523	1661	2140	+
165631	PARP15	poly (ADP-ribose) polymerase family, member 15	NM_001113523	2491	2630	+
92822	ZNF276	zinc finger protein 276	NM_001113525	2041	2230	+
51474	LIMA1	LIM domain and actin binding 1	NM_001113546	561	760	+
51474	LIMA1	LIM domain and actin binding 1	NM_001113546	1991	2150	+
51474	LIMA1	LIM domain and actin binding 1	NM_001113546	2291	2510	+
1890	TYMP	thymidine phosphorylase	NM_001113756	231	480	+
113	ADCY7	adenylate cyclase 7	NM_001114	3356	4021	+
113	ADCY7	adenylate cyclase 7	NM_001114	4191	4340	+
113	ADCY7	adenylate cyclase 7	NM_001114	4598	5040	+
113	ADCY7	adenylate cyclase 7	NM_001114	5051	5150	+
996	CDC27	cell division cycle 27	NM_001114091	2671	2890	+
996	CDC27	cell division cycle 27	NM_001114091	3141	3270	+
26065	LSM14A	LSM14A, SCD6 homolog A (S. cerevisiae)	NM_001114093_2	841	1300	+
26065	LSM14A	LSM14A, SCD6 homolog A (S. cerevisiae)	NM_001114093_2	1461	1567	+
55421	C17orf85	chromosome 17 open reading frame 85	NM_001114118	581	740	+
55421	C17orf85	chromosome 17 open reading frame 85	NM_001114118	1021	1350	+
55421	C17orf85	chromosome 17 open reading frame 85	NM_001114118	1671	1840	+
55421	C17orf85	chromosome 17 open reading frame 85	NM_001114118	2221	2628	+
55635	DEPDC1	DEP domain containing 1	NM_001114120	2591	2770	+
2002	ELK1	ELK1, member of ETS oncogene family	NM_001114123	59	230	+
2002	ELK1	ELK1, member of ETS oncogene family	NM_001114123	1121	1230	+
2002	ELK1	ELK1, member of ETS oncogene family	NM_001114123	1621	1810	+
51135	IRAK4	interleukin-1 receptor-associated kinase 4	NM_001114182	2451	2620	+
100134938	UPK3BL	uroplakin 3B-like	NM_001114403	1	100	+
26099	SZRD1	SUZ RNA binding domain containing 1	NM_001114600	222	920	+
26099	SZRD1	SUZ RNA binding domain containing 1	NM_001114600	3271	3400	+
4245	MGAT1	mannosyl (alpha-1,3-)-glycoprotein beta-1,2-N-acetylglucosaminyltransferase	NM_001114618	241	610	+
4245	MGAT1	mannosyl (alpha-1,3-)-glycoprotein beta-1,2-N-acetylglucosaminyltransferase	NM_001114618	1111	1300	+
4245	MGAT1	mannosyl (alpha-1,3-)-glycoprotein beta-1,2-N-acetylglucosaminyltransferase	NM_001114618	1391	2002	+
4245	MGAT1	mannosyl (alpha-1,3-)-glycoprotein beta-1,2-N-acetylglucosaminyltransferase	NM_001114618	3011	3130	+
55120	FANCL	Fanconi anemia, complementation group L	NM_001114636	1311	1595	+
55683	KANSL3	KAT8 regulatory NSL complex subunit 3	NM_001115016	3101	4030	+
55683	KANSL3	KAT8 regulatory NSL complex subunit 3	NM_001115016	4521	4730	+
10227	MFSD10	major facilitator superfamily domain containing 10	NM_001120	231	430	+
10227	MFSD10	major facilitator superfamily domain containing 10	NM_001120	1675	1942	+
123	PLIN2	perilipin 2	NM_001122	1341	1608	+
116986	AGAP2	ArfGAP with GTPase domain, ankyrin repeat and PH domain 2	NM_001122772	3501	4150	+
116986	AGAP2	ArfGAP with GTPase domain, ankyrin repeat and PH domain 2	NM_001122772	4775	4920	+
9328	GTF3C5	general transcription factor IIIC, polypeptide 5, 63kDa	NM_001122823	251	350	+
9328	GTF3C5	general transcription factor IIIC, polypeptide 5, 63kDa	NM_001122823	1841	2054	+
9328	GTF3C5	general transcription factor IIIC, polypeptide 5, 63kDa	NM_001122823	2211	2440	+
222236	NAPEPLD	N-acyl phosphatidylethanolamine phospholipase D	NM_001122838_2	421	540	+
222236	NAPEPLD	N-acyl phosphatidylethanolamine phospholipase D	NM_001122838_2	921	1140	+
26580	BSCL2	Berardinelli-Seip congenital lipodystrophy 2 (seipin)	NM_001122955	456	690	+
26580	BSCL2	Berardinelli-Seip congenital lipodystrophy 2 (seipin)	NM_001122955	1831	1993	+
28988	DBNL	drebrin-like	NM_001122956	72	240	+
28988	DBNL	drebrin-like	NM_001122956	561	857	+
28988	DBNL	drebrin-like	NM_001122956	1455	1651	+
10295	BCKDK	branched chain ketoacid dehydrogenase kinase	NM_001122957	1371	1514	+
10295	BCKDK	branched chain ketoacid dehydrogenase kinase	NM_001122957	1661	1999	+
57223	SMEK2	SMEK homolog 2, suppressor of mek1 (Dictyostelium)	NM_001122964	78	290	+
57223	SMEK2	SMEK homolog 2, suppressor of mek1 (Dictyostelium)	NM_001122964	741	920	+
57223	SMEK2	SMEK homolog 2, suppressor of mek1 (Dictyostelium)	NM_001122964	1101	1298	+
57223	SMEK2	SMEK homolog 2, suppressor of mek1 (Dictyostelium)	NM_001122964	3001	3170	+
644591	PPIAL4G	peptidylprolyl isomerase A (cyclophilin A)-like 4G	NM_001123068	624	730	+
25821	MTO1	mitochondrial tRNA translation optimization 1	NM_001123226	721	910	+
5537	PPP6C	protein phosphatase 6, catalytic subunit	NM_001123355	1421	1520	+
5537	PPP6C	protein phosphatase 6, catalytic subunit	NM_001123355	1661	1798	+
54880	BCOR	BCL6 corepressor	NM_001123385	2791	2890	+
133	ADM	adrenomedullin	NM_001124	1051	1275	+
141	ADPRH	ADP-ribosylarginine hydrolase	NM_001125	321	420	+
141	ADPRH	ADP-ribosylarginine hydrolase	NM_001125	1311	1500	+
159	ADSS	adenylosuccinate synthase	NM_001126	681	780	+
159	ADSS	adenylosuccinate synthase	NM_001126	1623	1804	+
9056	SLC7A7	solute carrier family 7 (amino acid transporter light chain, y+L system), member 7	NM_001126106	521	880	+
9056	SLC7A7	solute carrier family 7 (amino acid transporter light chain, y+L system), member 7	NM_001126106	1931	2244	+
734	OSGIN2	oxidative stress induced growth inhibitor family member 2	NM_001126111	861	1260	+
734	OSGIN2	oxidative stress induced growth inhibitor family member 2	NM_001126111	1271	1490	+
734	OSGIN2	oxidative stress induced growth inhibitor family member 2	NM_001126111	1811	2022	+
734	OSGIN2	oxidative stress induced growth inhibitor family member 2	NM_001126111	2391	2560	+
60386	SLC25A19	solute carrier family 25 (mitochondrial thiamine pyrophosphate carrier), member 19	NM_001126121	1461	1646	+
64785	GINS3	GINS complex subunit 3 (Psf3 homolog)	NM_001126129	771	980	+
162	AP1B1	adaptor-related protein complex 1, beta 1 subunit	NM_001127	51	300	+
7555	CNBP	CCHC-type zinc finger, nucleic acid binding protein	NM_001127192	1231	1380	+
11322	TMC6	transmembrane channel-like 6	NM_001127198	991	1140	+
11322	TMC6	transmembrane channel-like 6	NM_001127198	2731	2890	+
54790	TET2	tet methylcytosine dioxygenase 2	NM_001127208	1061	1230	+
54790	TET2	tet methylcytosine dioxygenase 2	NM_001127208	1881	2100	+
54790	TET2	tet methylcytosine dioxygenase 2	NM_001127208	2761	2910	+
54790	TET2	tet methylcytosine dioxygenase 2	NM_001127208	3601	3790	+
54790	TET2	tet methylcytosine dioxygenase 2	NM_001127208	5141	5410	+
54790	TET2	tet methylcytosine dioxygenase 2	NM_001127208	5841	6080	+
54790	TET2	tet methylcytosine dioxygenase 2	NM_001127208	6241	6480	+
966	CD59	CD59 molecule, complement regulatory protein	NM_001127223	511	700	+
966	CD59	CD59 molecule, complement regulatory protein	NM_001127223	5061	5250	+
966	CD59	CD59 molecule, complement regulatory protein	NM_001127223	5401	5505	+
23468	CBX5	chromobox homolog 5	NM_001127322	301	973	+
23468	CBX5	chromobox homolog 5	NM_001127322	3271	3370	+
23468	CBX5	chromobox homolog 5	NM_001127322	6121	6220	+
23468	CBX5	chromobox homolog 5	NM_001127322	6501	6720	+
23468	CBX5	chromobox homolog 5	NM_001127322	10701	10987	+
23468	CBX5	chromobox homolog 5	NM_001127322	11601	11700	+
10459	MAD2L2	MAD2 mitotic arrest deficient-like 2 (yeast)	NM_001127325	821	1137	+
57157	PHTF2	putative homeodomain transcription factor 2	NM_001127358	3461	3620	+
127544	RNF19B	ring finger protein 19B	NM_001127361	1900	2421	+
55536	CDCA7L	cell division cycle associated 7-like	NM_001127370	441	910	+
55536	CDCA7L	cell division cycle associated 7-like	NM_001127370	1491	1611	+
745	MYRF	myelin regulatory factor	NM_001127392	1	120	+
745	MYRF	myelin regulatory factor	NM_001127392	761	880	+
745	MYRF	myelin regulatory factor	NM_001127392	971	1080	+
745	MYRF	myelin regulatory factor	NM_001127392	3834	4380	+
51646	YPEL5	yippee-like 5 (Drosophila)	NM_001127401	841	1130	+
9924	PAN2	PAN2 poly(A) specific ribonuclease subunit	NM_001127460	252	540	+
9924	PAN2	PAN2 poly(A) specific ribonuclease subunit	NM_001127460	1411	1680	+
9924	PAN2	PAN2 poly(A) specific ribonuclease subunit	NM_001127460	4051	4520	+
51147	ING4	inhibitor of growth family, member 4	NM_001127582	331	550	+
55670	PEX26	peroxisomal biogenesis factor 26	NM_001127649	231	410	+
55670	PEX26	peroxisomal biogenesis factor 26	NM_001127649	451	590	+
55670	PEX26	peroxisomal biogenesis factor 26	NM_001127649	1261	1716	+
5476	CTSA	cathepsin A	NM_001127695	466	700	+
5476	CTSA	cathepsin A	NM_001127695	1911	2278	+
134957	STXBP5	syntaxin binding protein 5 (tomosyn)	NM_001127715	3711	3970	+
6935	ZEB1	zinc finger E-box binding homeobox 1	NM_001128128	2601	2850	+
151525	WDSUB1	WD repeat, sterile alpha motif and U-box domain containing 1	NM_001128213	371	500	+
151525	WDSUB1	WD repeat, sterile alpha motif and U-box domain containing 1	NM_001128213	1561	1730	+
56916	SMARCAD1	SWI/SNF-related, matrix-associated actin-dependent regulator of chromatin, subfamily a, containing DEAD/H box 1	NM_001128429	3181	3490	+
23005	MAPKBP1	mitogen-activated protein kinase binding protein 1	NM_001128608	4191	4370	+
23005	MAPKBP1	mitogen-activated protein kinase binding protein 1	NM_001128608	4691	4920	+
23005	MAPKBP1	mitogen-activated protein kinase binding protein 1	NM_001128608	6101	6300	+
9101	USP8	ubiquitin specific peptidase 8	NM_001128610	609	960	+
9101	USP8	ubiquitin specific peptidase 8	NM_001128610	1711	2110	+
9101	USP8	ubiquitin specific peptidase 8	NM_001128610	2401	2620	+
9101	USP8	ubiquitin specific peptidase 8	NM_001128610	2641	2970	+
50650	ARHGEF3	Rho guanine nucleotide exchange factor (GEF) 3	NM_001128616	1951	2300	+
50650	ARHGEF3	Rho guanine nucleotide exchange factor (GEF) 3	NM_001128616	2811	3010	+
5058	PAK1	p21 protein (Cdc42/Rac)-activated kinase 1	NM_001128620	2121	2520	+
6597	SMARCA4	SWI/SNF related, matrix associated, actin dependent regulator of chromatin, subfamily a, member 4	NM_001128844	1881	2430	+
6597	SMARCA4	SWI/SNF related, matrix associated, actin dependent regulator of chromatin, subfamily a, member 4	NM_001128844	4431	4620	+
6597	SMARCA4	SWI/SNF related, matrix associated, actin dependent regulator of chromatin, subfamily a, member 4	NM_001128844	5111	5564	+
10452	TOMM40	translocase of outer mitochondrial membrane 40 homolog (yeast)	NM_001128917	1321	1630	+
4140	MARK3	MAP/microtubule affinity-regulating kinase 3	NM_001128918	2581	2938	+
3628	INPP1	inositol polyphosphate-1-phosphatase	NM_001128928	1661	1998	+
165	AEBP1	AE binding protein 1	NM_001129	3581	3750	+
165	AEBP1	AE binding protein 1	NM_001129	3851	4080	+
50814	NSDHL	NAD(P) dependent steroid dehydrogenase-like	NM_001129765	1271	1619	+
55634	KRBOX4	KRAB box domain containing 4	NM_001129899	661	840	+
87	ACTN1	actinin, alpha 1	NM_001130004	221	360	+
87	ACTN1	actinin, alpha 1	NM_001130004	3121	3330	+
2935	GSPT1	G1 to S phase transition 1	NM_001130007	751	930	+
2935	GSPT1	G1 to S phase transition 1	NM_001130007	981	1120	+
2935	GSPT1	G1 to S phase transition 1	NM_001130007	1251	1390	+
348654	GEN1	GEN1 Holliday junction 5' flap endonuclease	NM_001130009	2731	2890	+
535	ATP6V0A1	ATPase, H+ transporting, lysosomal V0 subunit a1	NM_001130020	36	210	+
535	ATP6V0A1	ATPase, H+ transporting, lysosomal V0 subunit a1	NM_001130020	371	510	+
535	ATP6V0A1	ATPase, H+ transporting, lysosomal V0 subunit a1	NM_001130020	2611	3110	+
535	ATP6V0A1	ATPase, H+ transporting, lysosomal V0 subunit a1	NM_001130020	3231	3430	+
535	ATP6V0A1	ATPase, H+ transporting, lysosomal V0 subunit a1	NM_001130020	3821	4030	+
1198	CLK3	CDC-like kinase 3	NM_001130028	2373	2562	+
54811	ZNF562	zinc finger protein 562	NM_001130031	581	740	+
54811	ZNF562	zinc finger protein 562	NM_001130031	891	1060	+
6464	SHC1	SHC (Src homology 2 domain containing) transforming protein 1	NM_001130040	491	640	+
6464	SHC1	SHC (Src homology 2 domain containing) transforming protein 1	NM_001130040	1891	2090	+
1429	CRYZ	crystallin, zeta (quinone reductase)	NM_001130042	1051	1210	+
4650	MYO9B	myosin IXB	NM_001130065	151	370	+
4650	MYO9B	myosin IXB	NM_001130065	491	710	+
4650	MYO9B	myosin IXB	NM_001130065	3381	3490	+
4650	MYO9B	myosin IXB	NM_001130065	3801	4060	+
4650	MYO9B	myosin IXB	NM_001130065	6431	6983	+
4650	MYO9B	myosin IXB	NM_001130065	7148	7613	+
3735	KARS	lysyl-tRNA synthetase	NM_001130089	21	130	+
3735	KARS	lysyl-tRNA synthetase	NM_001130089	239	460	+
3735	KARS	lysyl-tRNA synthetase	NM_001130089	531	700	+
10087	COL4A3BP	collagen, type IV, alpha 3 (Goodpasture antigen) binding protein	NM_001130105	351	570	+
10087	COL4A3BP	collagen, type IV, alpha 3 (Goodpasture antigen) binding protein	NM_001130105	1267	1500	+
10087	COL4A3BP	collagen, type IV, alpha 3 (Goodpasture antigen) binding protein	NM_001130105	1761	1860	+
10087	COL4A3BP	collagen, type IV, alpha 3 (Goodpasture antigen) binding protein	NM_001130105	2381	2520	+
10087	COL4A3BP	collagen, type IV, alpha 3 (Goodpasture antigen) binding protein	NM_001130105	4961	5095	+
4054	LTBP3	latent transforming growth factor beta binding protein 3	NM_001130144	4281	4439	+
6709	SPTAN1	spectrin, alpha, non-erythrocytic 1	NM_001130438	61	200	+
6709	SPTAN1	spectrin, alpha, non-erythrocytic 1	NM_001130438	3361	3700	+
6744	SSFA2	sperm specific antigen 2	NM_001130445	2101	2570	+
6744	SSFA2	sperm specific antigen 2	NM_001130445	2871	3110	+
9043	SPAG9	sperm associated antigen 9	NM_001130528	491	750	+
9043	SPAG9	sperm associated antigen 9	NM_001130528	1091	1310	+
9043	SPAG9	sperm associated antigen 9	NM_001130528	1457	1820	+
9043	SPAG9	sperm associated antigen 9	NM_001130528	2981	3140	+
9043	SPAG9	sperm associated antigen 9	NM_001130528	6101	6280	+
1977	EIF4E	eukaryotic translation initiation factor 4E	NM_001130679	2201	2365	+
26034	IPCEF1	interaction protein for cytohesin exchange factors 1	NM_001130699	731	1170	+
26034	IPCEF1	interaction protein for cytohesin exchange factors 1	NM_001130699	1311	1720	+
26034	IPCEF1	interaction protein for cytohesin exchange factors 1	NM_001130699	1886	2207	+
26034	IPCEF1	interaction protein for cytohesin exchange factors 1	NM_001130699	2311	2480	+
1786	DNMT1	DNA (cytosine-5-)-methyltransferase 1	NM_001130823	741	1260	+
1786	DNMT1	DNA (cytosine-5-)-methyltransferase 1	NM_001130823	1961	2482	+
1786	DNMT1	DNA (cytosine-5-)-methyltransferase 1	NM_001130823	3491	3680	+
51719	CAB39	calcium binding protein 39	NM_001130849	437	620	+
51719	CAB39	calcium binding protein 39	NM_001130849	721	860	+
51719	CAB39	calcium binding protein 39	NM_001130849	1521	1680	+
51719	CAB39	calcium binding protein 39	NM_001130849	1751	1955	+
9677	PPIP5K1	diphosphoinositol pentakisphosphate kinase 1	NM_001130858	3941	4180	+
10635	RAD51AP1	RAD51 associated protein 1	NM_001130862	271	370	+
10635	RAD51AP1	RAD51 associated protein 1	NM_001130862	751	890	+
10910	SUGT1	SGT1, suppressor of G2 allele of SKP1 (S. cerevisiae)	NM_001130912	891	1060	+
23370	ARHGEF18	Rho/Rac guanine nucleotide exchange factor (GEF) 18	NM_001130955	4401	4630	+
23306	TMEM194A	transmembrane protein 194A	NM_001130963	1163	1450	+
23306	TMEM194A	transmembrane protein 194A	NM_001130963	4101	4300	+
23353	SUN1	Sad1 and UNC84 domain containing 1	NM_001130965	1411	1570	+
23353	SUN1	Sad1 and UNC84 domain containing 1	NM_001130965	2318	2626	+
26012	NSMF	NMDA receptor synaptonuclear signaling and neuronal migration factor	NM_001130969	1801	2040	+
23240	KIAA0922	KIAA0922	NM_001131007	2831	3476	+
23240	KIAA0922	KIAA0922	NM_001131007	3641	3780	+
23240	KIAA0922	KIAA0922	NM_001131007	4531	4980	+
3631	INPP4A	inositol polyphosphate-4-phosphatase, type I, 107kDa	NM_001134224	1931	2070	+
3631	INPP4A	inositol polyphosphate-4-phosphatase, type I, 107kDa	NM_001134224	3171	3406	+
3631	INPP4A	inositol polyphosphate-4-phosphatase, type I, 107kDa	NM_001134224	5921	6260	+
10947	AP3M2	adaptor-related protein complex 3, mu 2 subunit	NM_001134296	1870	2250	+
10947	AP3M2	adaptor-related protein complex 3, mu 2 subunit	NM_001134296	1647	1869	+
9922	IQSEC1	IQ motif and Sec7 domain 1	NM_001134382	961	1280	+
9922	IQSEC1	IQ motif and Sec7 domain 1	NM_001134382	4971	5230	+
9922	IQSEC1	IQ motif and Sec7 domain 1	NM_001134382	5291	5571	+
55146	ZDHHC4	zinc finger, DHHC-type containing 4	NM_001134387	1231	1542	+
7410	VAV2	vav 2 guanine nucleotide exchange factor	NM_001134398	471	784	+
7410	VAV2	vav 2 guanine nucleotide exchange factor	NM_001134398	1078	1270	+
7410	VAV2	vav 2 guanine nucleotide exchange factor	NM_001134398	2561	2720	+
7410	VAV2	vav 2 guanine nucleotide exchange factor	NM_001134398	3021	3220	+
7410	VAV2	vav 2 guanine nucleotide exchange factor	NM_001134398	4097	4270	+
284613	CYB561D1	cytochrome b561 family, member D1	NM_001134404	751	1000	+
284613	CYB561D1	cytochrome b561 family, member D1	NM_001134404	1081	1180	+
8317	CDC7	cell division cycle 7	NM_001134420	1557	1943	+
55573	CDV3	CDV3 homolog (mouse)	NM_001134422	1901	2420	+
401505	TOMM5	translocase of outer mitochondrial membrane 5 homolog (yeast)	NM_001134484	391	630	+
100128731	OST4	oligosaccharyltransferase 4 homolog (S. cerevisiae)	NM_001134693	291	470	+
51194	IPO11	importin 11	NM_001134779	3151	3400	+
219844	HYLS1	hydrolethalus syndrome 1	NM_001134793	1391	1490	+
54806	AHI1	Abelson helper integration site 1	NM_001134831	821	1030	+
6932	TCF7	transcription factor 7 (T-cell specific, HMG-box)	NM_001134851	1401	1570	+
283643	C14orf80	chromosome 14 open reading frame 80	NM_001134875	1291	1480	+
201158	TVP23C	trans-golgi network vesicle protein 23 homolog C (S. cerevisiae)	NM_001135036	143	295	+
1690	COCH	cochlin	NM_001135058	1371	1850	+
23516	SLC39A14	solute carrier family 39 (zinc transporter), member 14	NM_001135153	1671	2001	+
23516	SLC39A14	solute carrier family 39 (zinc transporter), member 14	NM_001135153	2061	2310	+
84307	ZNF397	zinc finger protein 397	NM_001135178	121	250	+
84307	ZNF397	zinc finger protein 397	NM_001135178	281	440	+
3267	AGFG1	ArfGAP with FG repeats 1	NM_001135187	1921	2240	+
10397	NDRG1	N-myc downstream regulated 1	NM_001135242	1621	2380	+
6949	TCOF1	Treacher Collins-Franceschetti syndrome 1	NM_001135243	861	994	+
6949	TCOF1	Treacher Collins-Franceschetti syndrome 1	NM_001135243	1451	1600	+
6949	TCOF1	Treacher Collins-Franceschetti syndrome 1	NM_001135243	4031	4230	+
6949	TCOF1	Treacher Collins-Franceschetti syndrome 1	NM_001135243	4241	4500	+
8226	HDHD1	haloacid dehalogenase-like hydrolase domain containing 1	NM_001135565	861	1131	+
728568	C12orf73	chromosome 12 open reading frame 73	NM_001135570	251	393	+
221710	SMIM13	small integral membrane protein 13	NM_001135575	491	715	+
221710	SMIM13	small integral membrane protein 13	NM_001135575	1321	1627	+
134553	C5orf24	chromosome 5 open reading frame 24	NM_001135586	351	560	+
55704	CCDC88A	coiled-coil domain containing 88A	NM_001135597	2511	2680	+
55704	CCDC88A	coiled-coil domain containing 88A	NM_001135597	6651	6770	+
8394	PIP5K1A	phosphatidylinositol-4-phosphate 5-kinase, type I, alpha	NM_001135638	57	500	+
8394	PIP5K1A	phosphatidylinositol-4-phosphate 5-kinase, type I, alpha	NM_001135638	1051	1340	+
8394	PIP5K1A	phosphatidylinositol-4-phosphate 5-kinase, type I, alpha	NM_001135638	2345	2609	+
51763	INPP5K	inositol polyphosphate-5-phosphatase K	NM_001135642	2911	3070	+
51164	DCTN4	dynactin 4 (p62)	NM_001135644	1471	1790	+
51307	FAM53C	family with sequence similarity 53, member C	NM_001135647	298	495	+
51307	FAM53C	family with sequence similarity 53, member C	NM_001135647	680	1330	+
51307	FAM53C	family with sequence similarity 53, member C	NM_001135647	1509	1947	+
8761	PABPC4	poly(A) binding protein, cytoplasmic 4 (inducible form)	NM_001135653	81	230	+
8761	PABPC4	poly(A) binding protein, cytoplasmic 4 (inducible form)	NM_001135653	1542	1833	+
8934	RAB29	RAB29, member RAS oncogene family	NM_001135663	1151	1250	+
8934	RAB29	RAB29, member RAS oncogene family	NM_001135663	1771	2032	+
7419	VDAC3	voltage-dependent anion channel 3	NM_001135694	1001	1220	+
94241	TP53INP1	tumor protein p53 inducible nuclear protein 1	NM_001135733	341	440	+
94241	TP53INP1	tumor protein p53 inducible nuclear protein 1	NM_001135733	801	1142	+
171017	ZNF384	zinc finger protein 384	NM_001135734	2181	2420	+
171017	ZNF384	zinc finger protein 384	NM_001135734	2730	2883	+
11319	ECD	ecdysoneless homolog (Drosophila)	NM_001135752	2101	2286	+
58516	FAM60A	family with sequence similarity 60, member A	NM_001135811	481	759	+
58516	FAM60A	family with sequence similarity 60, member A	NM_001135811	841	1074	+
100132247	NPIPB5	nuclear pore complex interacting protein family, member B5	NM_001135865	3681	3780	+
2618	GART	phosphoribosylglycinamide formyltransferase, phosphoribosylglycinamide synthetase, phosphoribosylaminoimidazole synthetase	NM_001136005_2	1391	1600	+
2618	GART	phosphoribosylglycinamide formyltransferase, phosphoribosylglycinamide synthetase, phosphoribosylaminoimidazole synthetase	NM_001136005_2	3171	3515	+
302	ANXA2	annexin A2	NM_001136015	1341	1440	+
2217	FCGRT	Fc fragment of IgG, receptor, transporter, alpha	NM_001136019	951	1110	+
4776	NFATC4	nuclear factor of activated T-cells, cytoplasmic, calcineurin-dependent 4	NM_001136022	3974	4131	+
6396	SEC13	SEC13 homolog (S. cerevisiae)	NM_001136026	1241	1430	+
9840	TESPA1	thymocyte expressed, positive selection associated 1	NM_001136030	1041	1310	+
22827	PUF60	poly-U binding splicing factor 60KDa	NM_001136033	1661	1905	+
55657	ZNF692	zinc finger protein 692	NM_001136036	1961	2180	+
81556	VWA9	von Willebrand factor A domain containing 9	NM_001136043	1528	2224	+
131601	TPRA1	transmembrane protein, adipocyte asscociated 1	NM_001136053	1391	1680	+
203069	R3HCC1	R3H domain and coiled-coil containing 1	NM_001136108	521	992	+
10585	POMT1	protein-O-mannosyltransferase 1	NM_001136113	2491	2765	+
6158	RPL28	ribosomal protein L28	NM_001136134	552	688	+
22847	ZNF507	zinc finger protein 507	NM_001136156	1484	1729	+
22847	ZNF507	zinc finger protein 507	NM_001136156	1901	2040	+
22847	ZNF507	zinc finger protein 507	NM_001136156	2808	3370	+
440498	HSBP1L1	heat shock factor binding protein 1-like 1	NM_001136180	511	700	+
25959	KANK2	KN motif and ankyrin repeat domains 2	NM_001136191	1061	1270	+
25959	KANK2	KN motif and ankyrin repeat domains 2	NM_001136191	4191	4290	+
22868	FASTKD2	FAST kinase domains 2	NM_001136194	871	1130	+
30000	TNPO2	transportin 2	NM_001136195	4850	5072	+
55758	RCOR3	REST corepressor 3	NM_001136223	781	940	+
55758	RCOR3	REST corepressor 3	NM_001136223	1271	1380	+
55758	RCOR3	REST corepressor 3	NM_001136223	1681	2064	+
552889	ATXN7L3B	ataxin 7-like 3B	NM_001136262	61	320	+
552889	ATXN7L3B	ataxin 7-like 3B	NM_001136262	601	788	+
552889	ATXN7L3B	ataxin 7-like 3B	NM_001136262	1031	1140	+
552889	ATXN7L3B	ataxin 7-like 3B	NM_001136262	1261	1430	+
552889	ATXN7L3B	ataxin 7-like 3B	NM_001136262	1537	1737	+
126917	IFFO2	intermediate filament family orphan 2	NM_001136265	1591	1850	+
284371	ZNF841	zinc finger protein 841	NM_001136499	2541	2700	+
80724	ACAD10	acyl-CoA dehydrogenase family, member 10	NM_001136538	2291	2530	+
80724	ACAD10	acyl-CoA dehydrogenase family, member 10	NM_001136538	3521	4100	+
57720	GPR107	G protein-coupled receptor 107	NM_001136557	1931	2253	+
57720	GPR107	G protein-coupled receptor 107	NM_001136557	2366	2580	+
57720	GPR107	G protein-coupled receptor 107	NM_001136557	4181	4500	+
57720	GPR107	G protein-coupled receptor 107	NM_001136557	5361	5550	+
9208	LRRFIP1	leucine rich repeat (in FLII) interacting protein 1	NM_001137552	1171	1410	+
9208	LRRFIP1	leucine rich repeat (in FLII) interacting protein 1	NM_001137552	1701	1870	+
9208	LRRFIP1	leucine rich repeat (in FLII) interacting protein 1	NM_001137552	1971	2280	+
9208	LRRFIP1	leucine rich repeat (in FLII) interacting protein 1	NM_001137552	2431	2760	+
342371	ATXN1L	ataxin 1-like	NM_001137675	151	360	+
342371	ATXN1L	ataxin 1-like	NM_001137675	431	970	+
342371	ATXN1L	ataxin 1-like	NM_001137675	1061	2379	+
342371	ATXN1L	ataxin 1-like	NM_001137675	2391	2580	+
342371	ATXN1L	ataxin 1-like	NM_001137675	6091	6280	+
10134	BCAP31	B-cell receptor-associated protein 31	NM_001139457	1047	1320	+
25780	RASGRP3	RAS guanyl releasing protein 3 (calcium and DAG-regulated)	NM_001139488	361	570	+
25780	RASGRP3	RAS guanyl releasing protein 3 (calcium and DAG-regulated)	NM_001139488	1561	1830	+
25780	RASGRP3	RAS guanyl releasing protein 3 (calcium and DAG-regulated)	NM_001139488	2513	3085	+
8575	PRKRA	protein kinase, interferon-inducible double stranded RNA dependent activator	NM_001139517	315	450	+
59	ACTA2	actin, alpha 2, smooth muscle, aorta	NM_001141945	271	550	+
1616	DAXX	death-domain associated protein	NM_001141969_5	851	1070	+
1616	DAXX	death-domain associated protein	NM_001141969_5	1561	1710	+
1616	DAXX	death-domain associated protein	NM_001141969_5	1781	1880	+
6229	RPS24	ribosomal protein S24	NM_001142285	361	535	+
79677	SMC6	structural maintenance of chromosomes 6	NM_001142286	1141	1240	+
79677	SMC6	structural maintenance of chromosomes 6	NM_001142286	1581	1730	+
79677	SMC6	structural maintenance of chromosomes 6	NM_001142286	2761	2930	+
23295	MGRN1	mahogunin ring finger 1, E3 ubiquitin protein ligase	NM_001142290	1171	1300	+
23295	MGRN1	mahogunin ring finger 1, E3 ubiquitin protein ligase	NM_001142290	1411	1590	+
23295	MGRN1	mahogunin ring finger 1, E3 ubiquitin protein ligase	NM_001142290	4287	4907	+
81562	LMAN2L	lectin, mannose-binding 2-like	NM_001142292	1141	1330	+
8878	SQSTM1	sequestosome 1	NM_001142298	871	1110	+
151195	CCNYL1	cyclin Y-like 1	NM_001142300	1271	1570	+
2965	GTF2H1	general transcription factor IIH, polypeptide 1, 62kDa	NM_001142307	2371	2593	+
1240	CMKLR1	chemerin chemokine-like receptor 1	NM_001142343	2271	2420	+
5532	PPP3CB	protein phosphatase 3, catalytic subunit, beta isozyme	NM_001142353	1585	1970	+
5532	PPP3CB	protein phosphatase 3, catalytic subunit, beta isozyme	NM_001142353	3081	3180	+
5165	PDK3	pyruvate dehydrogenase kinase, isozyme 3	NM_001142386	1381	2085	+
5165	PDK3	pyruvate dehydrogenase kinase, isozyme 3	NM_001142386	3481	3590	+
5165	PDK3	pyruvate dehydrogenase kinase, isozyme 3	NM_001142386	8091	8308	+
5165	PDK3	pyruvate dehydrogenase kinase, isozyme 3	NM_001142386	12604	12767	+
4739	NEDD9	neural precursor cell expressed, developmentally down-regulated 9	NM_001142393	2031	2260	+
4739	NEDD9	neural precursor cell expressed, developmentally down-regulated 9	NM_001142393	2541	2913	+
9811	CTIF	CBP80/20-dependent translation initiation factor	NM_001142397	2201	2340	+
10650	SLMO1	slowmo homolog 1 (Drosophila)	NM_001142405	601	760	+
9643	MORF4L2	mortality factor 4 like 2	NM_001142418	651	1069	+
80153	EDC3	enhancer of mRNA decapping 3	NM_001142443	1691	1930	+
80153	EDC3	enhancer of mRNA decapping 3	NM_001142443	1991	2370	+
286	ANK1	ankyrin 1, erythrocytic	NM_001142446	3389	3590	+
286	ANK1	ankyrin 1, erythrocytic	NM_001142446	5110	5900	+
286	ANK1	ankyrin 1, erythrocytic	NM_001142446	5911	6300	+
63901	FAM111A	family with sequence similarity 111, member A	NM_001142520	671	800	+
63901	FAM111A	family with sequence similarity 111, member A	NM_001142520	1601	1840	+
26271	FBXO5	F-box protein 5	NM_001142522	461	680	+
56987	BBX	bobby sox homolog (Drosophila)	NM_001142568	1221	1420	+
56987	BBX	bobby sox homolog (Drosophila)	NM_001142568	1831	2230	+
56987	BBX	bobby sox homolog (Drosophila)	NM_001142568	2311	2630	+
56987	BBX	bobby sox homolog (Drosophila)	NM_001142568	6841	7080	+
55765	C1orf106	chromosome 1 open reading frame 106	NM_001142569	1441	1610	+
55765	C1orf106	chromosome 1 open reading frame 106	NM_001142569	1761	1950	+
55765	C1orf106	chromosome 1 open reading frame 106	NM_001142569	2031	2460	+
55765	C1orf106	chromosome 1 open reading frame 106	NM_001142569	3576	3870	+
5892	RAD51D	RAD51 paralog D	NM_001142571	1201	1340	+
5892	RAD51D	RAD51 paralog D	NM_001142571	1401	1550	+
284323	ZNF780A	zinc finger protein 780A	NM_001142579	471	612	+
4802	NFYC	nuclear transcription factor Y, gamma	NM_001142590	1531	1768	+
5033	P4HA1	prolyl 4-hydroxylase, alpha polypeptide I	NM_001142595	471	650	+
5033	P4HA1	prolyl 4-hydroxylase, alpha polypeptide I	NM_001142595	1031	1280	+
5033	P4HA1	prolyl 4-hydroxylase, alpha polypeptide I	NM_001142595	1531	1720	+
57666	FBRSL1	fibrosin-like 1	NM_001142641	761	920	+
57666	FBRSL1	fibrosin-like 1	NM_001142641	3001	3180	+
100131211	TMEM194B	transmembrane protein 194B	NM_001142645	1292	1646	+
56681	SAR1A	secretion associated, Ras related GTPase 1A	NM_001142648	14	200	+
56681	SAR1A	secretion associated, Ras related GTPase 1A	NM_001142648	648	910	+
56681	SAR1A	secretion associated, Ras related GTPase 1A	NM_001142648	911	1156	+
90417	KNSTRN	kinetochore-localized astrin/SPAG5 binding protein	NM_001142761	1341	1590	+
9780	PIEZO1	piezo-type mechanosensitive ion channel component 1	NM_001142864	3841	4190	+
9780	PIEZO1	piezo-type mechanosensitive ion channel component 1	NM_001142864	4291	4640	+
9780	PIEZO1	piezo-type mechanosensitive ion channel component 1	NM_001142864	5501	5840	+
9780	PIEZO1	piezo-type mechanosensitive ion channel component 1	NM_001142864	7571	7787	+
65999	LRRC61	leucine rich repeat containing 61	NM_001142928	691	1000	+
65999	LRRC61	leucine rich repeat containing 61	NM_001142928	1541	1690	+
8539	API5	apoptosis inhibitor 5	NM_001142930	1671	1840	+
8539	API5	apoptosis inhibitor 5	NM_001142930	3221	3410	+
115752	DIS3L	DIS3 like exosome 3'-5' exoribonuclease	NM_001143688	1671	2152	+
115752	DIS3L	DIS3 like exosome 3'-5' exoribonuclease	NM_001143688	2921	3237	+
115752	DIS3L	DIS3 like exosome 3'-5' exoribonuclease	NM_001143688	3571	3759	+
80313	LRRC27	leucine rich repeat containing 27	NM_001143757	1001	1210	+
51629	SLC25A39	solute carrier family 25, member 39	NM_001143780	81	210	+
51629	SLC25A39	solute carrier family 25, member 39	NM_001143780	1391	1598	+
53373	TPCN1	two pore segment channel 1	NM_001143819	2701	3140	+
53373	TPCN1	two pore segment channel 1	NM_001143819	3281	3400	+
53373	TPCN1	two pore segment channel 1	NM_001143819	3461	3620	+
53373	TPCN1	two pore segment channel 1	NM_001143819	3771	3900	+
53373	TPCN1	two pore segment channel 1	NM_001143819	5131	5310	+
2620	GAS2	growth arrest-specific 2	NM_001143830	1131	1350	+
4798	NFRKB	nuclear factor related to kappaB binding protein	NM_001143835	3391	3690	+
79022	TMEM106C	transmembrane protein 106C	NM_001143842	901	1140	+
79022	TMEM106C	transmembrane protein 106C	NM_001143842	1271	1430	+
9318	COPS2	COP9 signalosome subunit 2	NM_001143887	1321	1630	+
10906	TRAFD1	TRAF-type zinc finger domain containing 1	NM_001143906	881	1430	+
81491	GPR63	G protein-coupled receptor 63	NM_001143957	1341	1550	+
81491	GPR63	G protein-coupled receptor 63	NM_001143957	1581	1840	+
54820	NDE1	nudE neurodevelopment protein 1	NM_001143979	2071	2298	+
54820	NDE1	nudE neurodevelopment protein 1	NM_001143979	2441	2600	+
54820	NDE1	nudE neurodevelopment protein 1	NM_001143979	2651	2760	+
8045	RASSF7	Ras association (RalGDS/AF-6) domain family (N-terminal) member 7	NM_001143993	431	730	+
8045	RASSF7	Ras association (RalGDS/AF-6) domain family (N-terminal) member 7	NM_001143993	1431	1720	+
267	AMFR	autocrine motility factor receptor, E3 ubiquitin protein ligase	NM_001144	2101	2510	+
27158	NDOR1	NADPH dependent diflavin oxidoreductase 1	NM_001144026	3261	3380	+
27158	NDOR1	NADPH dependent diflavin oxidoreductase 1	NM_001144026	3481	3690	+
27158	NDOR1	NADPH dependent diflavin oxidoreductase 1	NM_001144026	4101	4200	+
27158	NDOR1	NADPH dependent diflavin oxidoreductase 1	NM_001144026	4711	4870	+
667	DST	dystonin	NM_001144769	5581	5810	+
667	DST	dystonin	NM_001144769	7051	7170	+
667	DST	dystonin	NM_001144769	8391	8720	+
667	DST	dystonin	NM_001144769	9261	9410	+
667	DST	dystonin	NM_001144769	9571	9810	+
667	DST	dystonin	NM_001144769	9961	10250	+
667	DST	dystonin	NM_001144769	16784	17160	+
10260	DENND4A	DENN/MADD domain containing 4A	NM_001144823	3211	3320	+
10260	DENND4A	DENN/MADD domain containing 4A	NM_001144823	3489	4252	+
10260	DENND4A	DENN/MADD domain containing 4A	NM_001144823	5721	5940	+
79930	DOK3	docking protein 3	NM_001144875	1171	1280	+
4599	MX1	MX dynamin-like GTPase 1	NM_001144925	2951	3160	+
5693	PSMB5	proteasome (prosome, macropain) subunit, beta type, 5	NM_001144932	1061	1280	+
23327	NEDD4L	neural precursor cell expressed, developmentally down-regulated 4-like, E3 ubiquitin protein ligase	NM_001144967	3261	3498	+
317762	CCDC85C	coiled-coil domain containing 85C	NM_001144995	1711	1910	+
10783	NEK6	NIMA-related kinase 6	NM_001145001	1391	1610	+
10783	NEK6	NIMA-related kinase 6	NM_001145001	2081	2410	+
11119	BTN3A1	butyrophilin, subfamily 3, member A1	NM_001145009	1691	1820	+
11119	BTN3A1	butyrophilin, subfamily 3, member A1	NM_001145009	2301	2600	+
285267	ZNF619	zinc finger protein 619	NM_001145082	711	930	+
285267	ZNF619	zinc finger protein 619	NM_001145082	1371	1470	+
8031	NCOA4	nuclear receptor coactivator 4	NM_001145260	1124	1894	+
8031	NCOA4	nuclear receptor coactivator 4	NM_001145260	3631	3730	+
23265	EXOC7	exocyst complex component 7	NM_001145297	2231	2420	+
23265	EXOC7	exocyst complex component 7	NM_001145297	2471	2570	+
23265	EXOC7	exocyst complex component 7	NM_001145297	2601	2820	+
23265	EXOC7	exocyst complex component 7	NM_001145297	4291	4474	+
23265	EXOC7	exocyst complex component 7	NM_001145297	4611	4898	+
83856	FSD1L	fibronectin type III and SPRY domain containing 1-like	NM_001145313	747	880	+
83856	FSD1L	fibronectin type III and SPRY domain containing 1-like	NM_001145313	1066	1440	+
83856	FSD1L	fibronectin type III and SPRY domain containing 1-like	NM_001145313	1601	1830	+
83856	FSD1L	fibronectin type III and SPRY domain containing 1-like	NM_001145313	1851	2100	+
79980	DSN1	DSN1, MIS12 kinetochore complex component	NM_001145316	221	380	+
25942	SIN3A	SIN3 transcription regulator family member A	NM_001145358	1031	1200	+
25942	SIN3A	SIN3 transcription regulator family member A	NM_001145358	2721	2850	+
25942	SIN3A	SIN3 transcription regulator family member A	NM_001145358	4393	4730	+
25942	SIN3A	SIN3 transcription regulator family member A	NM_001145358	4881	4989	+
22834	ZNF652	zinc finger protein 652	NM_001145365	422	910	+
22834	ZNF652	zinc finger protein 652	NM_001145365	921	1326	+
22834	ZNF652	zinc finger protein 652	NM_001145365	1961	2130	+
22834	ZNF652	zinc finger protein 652	NM_001145365	2141	2660	+
121642	ALKBH2	alkB, alkylation repair homolog 2 (E. coli)	NM_001145374	342	550	+
80746	TSEN2	TSEN2 tRNA splicing endonuclease subunit	NM_001145395	773	980	+
4841	NONO	non-POU domain containing, octamer-binding	NM_001145408	696	920	+
9869	SETDB1	SET domain, bifurcated 1	NM_001145415	1991	2250	+
9869	SETDB1	SET domain, bifurcated 1	NM_001145415	2801	3125	+
4047	LSS	lanosterol synthase (2,3-oxidosqualene-lanosterol cyclase)	NM_001145437_2	212	360	+
4047	LSS	lanosterol synthase (2,3-oxidosqualene-lanosterol cyclase)	NM_001145437_2	2791	2910	+
4047	LSS	lanosterol synthase (2,3-oxidosqualene-lanosterol cyclase)	NM_001145437_2	3981	4370	+
9805	SCRN1	secernin 1	NM_001145513	371	650	+
9805	SCRN1	secernin 1	NM_001145513	1249	1538	+
9805	SCRN1	secernin 1	NM_001145513	2491	2650	+
9805	SCRN1	secernin 1	NM_001145513	4161	4390	+
84991	RBM17	RNA binding motif protein 17	NM_001145547	1841	1996	+
55625	ZDHHC7	zinc finger, DHHC-type containing 7	NM_001145548	1301	1730	+
55625	ZDHHC7	zinc finger, DHHC-type containing 7	NM_001145548	1771	2010	+
55625	ZDHHC7	zinc finger, DHHC-type containing 7	NM_001145548	2812	3078	+
339541	C1orf228	chromosome 1 open reading frame 228	NM_001145636	1511	1680	+
9711	KIAA0226	KIAA0226	NM_001145642	1081	1430	+
9711	KIAA0226	KIAA0226	NM_001145642	3231	3402	+
9711	KIAA0226	KIAA0226	NM_001145642	3747	4108	+
57711	ZNF529	zinc finger protein 529	NM_001145649	531	980	+
57711	ZNF529	zinc finger protein 529	NM_001145649	1031	1550	+
2734	GLG1	golgi glycoprotein 1	NM_001145667	2011	2200	+
2734	GLG1	golgi glycoprotein 1	NM_001145667	2541	2880	+
2734	GLG1	golgi glycoprotein 1	NM_001145667	3944	4770	+
2734	GLG1	golgi glycoprotein 1	NM_001145667	3443	3943	+
2289	FKBP5	FK506 binding protein 5	NM_001145777	37	314	+
100271849	MEF2B	myocyte enhancer factor 2B	NM_001145785	1301	1450	+
3684	ITGAM	integrin, alpha M (complement component 3 receptor 3 subunit)	NM_001145808	3521	3710	+
6452	SH3BP2	SH3-domain binding protein 2	NM_001145855	61	250	+
6452	SH3BP2	SH3-domain binding protein 2	NM_001145855	871	1510	+
6452	SH3BP2	SH3-domain binding protein 2	NM_001145855	1916	2396	+
10940	POP1	processing of precursor 1, ribonuclease P/MRP subunit (S. cerevisiae)	NM_001145860	511	740	+
10940	POP1	processing of precursor 1, ribonuclease P/MRP subunit (S. cerevisiae)	NM_001145860	2634	3070	+
49855	SCAPER	S-phase cyclin A-associated protein in the ER	NM_001145923	1781	2000	+
49855	SCAPER	S-phase cyclin A-associated protein in the ER	NM_001145923	2191	2480	+
79595	SAP130	Sin3A-associated protein, 130kDa	NM_001145928	3211	3415	+
79595	SAP130	Sin3A-associated protein, 130kDa	NM_001145928	3501	3860	+
5050	PAFAH1B3	platelet-activating factor acetylhydrolase 1b, catalytic subunit 3 (29kDa)	NM_001145939	981	1090	+
83666	PARP9	poly (ADP-ribose) polymerase family, member 9	NM_001146106	831	1130	+
83666	PARP9	poly (ADP-ribose) polymerase family, member 9	NM_001146106	1841	2090	+
22949	PTGR1	prostaglandin reductase 1	NM_001146108	1121	1295	+
57708	MIER1	mesoderm induction early response 1, transcriptional regulator	NM_001146110	567	748	+
57708	MIER1	mesoderm induction early response 1, transcriptional regulator	NM_001146110	941	1260	+
57708	MIER1	mesoderm induction early response 1, transcriptional regulator	NM_001146110	1518	1919	+
84330	ZNF414	zinc finger protein 414	NM_001146175	15	140	+
64786	TBC1D15	TBC1 domain family, member 15	NM_001146214	159	325	+
64786	TBC1D15	TBC1 domain family, member 15	NM_001146214	971	1414	+
65983	GRAMD3	GRAM domain containing 3	NM_001146321	1851	2280	+
9904	RBM19	RNA binding motif protein 19	NM_001146699	841	1080	+
9904	RBM19	RNA binding motif protein 19	NM_001146699	2131	2400	+
60592	SCOC	short coiled-coil protein	NM_001153585	401	587	+
309	ANXA6	annexin A6	NM_001155	2221	2350	+
309	ANXA6	annexin A6	NM_001155	2431	2582	+
10492	SYNCRIP	synaptotagmin binding, cytoplasmic RNA interacting protein	NM_001159677	141	250	+
10492	SYNCRIP	synaptotagmin binding, cytoplasmic RNA interacting protein	NM_001159677	1791	1929	+
10492	SYNCRIP	synaptotagmin binding, cytoplasmic RNA interacting protein	NM_001159677	2211	2458	+
29	ABR	active BCR-related	NM_001159746	2981	3290	+
29	ABR	active BCR-related	NM_001159746	4781	5000	+
29	ABR	active BCR-related	NM_001159746	5031	5410	+
10969	EBNA1BP2	EBNA1 binding protein 2	NM_001159936	1181	1297	+
55856	ACOT13	acyl-CoA thioesterase 13	NM_001160094	781	1041	+
56479	KCNQ5	potassium channel, voltage gated KQT-like subfamily Q, member 5	NM_001160133	2651	3240	+
80821	DDHD1	DDHD domain containing 1	NM_001160148	2821	2970	+
80821	DDHD1	DDHD domain containing 1	NM_001160148	11851	12110	+
80821	DDHD1	DDHD domain containing 1	NM_001160148	12491	12830	+
10165	SLC25A13	solute carrier family 25 (aspartate/glutamate carrier), member 13	NM_001160210	47	170	+
10165	SLC25A13	solute carrier family 25 (aspartate/glutamate carrier), member 13	NM_001160210	2041	2230	+
10165	SLC25A13	solute carrier family 25 (aspartate/glutamate carrier), member 13	NM_001160210	2511	2690	+
476	ATP1A1	ATPase, Na+/K+ transporting, alpha 1 polypeptide	NM_001160233	391	500	+
476	ATP1A1	ATPase, Na+/K+ transporting, alpha 1 polypeptide	NM_001160233	3561	3760	+
83707	TRPT1	tRNA phosphotransferase 1	NM_001160389	833	1004	+
318	NUDT2	nudix (nucleoside diphosphate linked moiety X)-type motif 2	NM_001161	491	730	+
9047	SH2D2A	SH2 domain containing 2A	NM_001161441	871	1050	+
220002	CYB561A3	cytochrome b561 family, member A3	NM_001161454	121	384	+
220002	CYB561A3	cytochrome b561 family, member A3	NM_001161454	2931	3147	+
25886	POC1A	POC1 centriolar protein A	NM_001161581	1553	1784	+
5527	PPP2R5C	protein phosphatase 2, regulatory subunit B', gamma	NM_001161725	51	192	+
5527	PPP2R5C	protein phosphatase 2, regulatory subunit B', gamma	NM_001161725	1341	1518	+
5527	PPP2R5C	protein phosphatase 2, regulatory subunit B', gamma	NM_001161725	1781	1940	+
5527	PPP2R5C	protein phosphatase 2, regulatory subunit B', gamma	NM_001161725	1971	2080	+
191	AHCY	adenosylhomocysteinase	NM_001161766	691	850	+
191	AHCY	adenosylhomocysteinase	NM_001161766	2063	2238	+
191	AHCY	adenosylhomocysteinase	NM_001161766	2239	2369	+
728392	LOC728392	uncharacterized LOC728392	NM_001162371	1081	1270	+
9181	ARHGEF2	Rho/Rac guanine nucleotide exchange factor (GEF) 2	NM_001162383	2951	3331	+
1195	CLK1	CDC-like kinase 1	NM_001162407	471	890	+
10015	PDCD6IP	programmed cell death 6 interacting protein	NM_001162429	2341	2540	+
10015	PDCD6IP	programmed cell death 6 interacting protein	NM_001162429	2771	3000	+
23112	TNRC6B	trinucleotide repeat containing 6B	NM_001162501	173	390	+
23112	TNRC6B	trinucleotide repeat containing 6B	NM_001162501	1001	2650	+
23112	TNRC6B	trinucleotide repeat containing 6B	NM_001162501	5591	6002	+
23112	TNRC6B	trinucleotide repeat containing 6B	NM_001162501	16881	17060	+
57579	FAM135A	family with sequence similarity 135, member A	NM_001162529	2781	2940	+
57579	FAM135A	family with sequence similarity 135, member A	NM_001162529	3401	3620	+
494115	RBMXL1	RNA binding motif protein, X-linked-like 1	NM_001162536	163	290	+
494115	RBMXL1	RNA binding motif protein, X-linked-like 1	NM_001162536	1790	1933	+
9674	KIAA0040	KIAA0040	NM_001162893	199	330	+
9674	KIAA0040	KIAA0040	NM_001162893	871	1310	+
9674	KIAA0040	KIAA0040	NM_001162893	1791	2050	+
27336	HTATSF1	HIV-1 Tat specific factor 1	NM_001163280	1731	2040	+
27336	HTATSF1	HIV-1 Tat specific factor 1	NM_001163280	2311	2684	+
155061	ZNF746	zinc finger protein 746	NM_001163474	1271	1680	+
155061	ZNF746	zinc finger protein 746	NM_001163474	2011	2440	+
80179	MYO19	myosin XIX	NM_001163735	3871	4090	+
80179	MYO19	myosin XIX	NM_001163735	4111	4310	+
124997	WDR81	WD repeat domain 81	NM_001163809	3401	3610	+
124997	WDR81	WD repeat domain 81	NM_001163809	4811	4970	+
124997	WDR81	WD repeat domain 81	NM_001163809	5861	6051	+
55291	PPP6R3	protein phosphatase 6, regulatory subunit 3	NM_001164160	881	1110	+
55291	PPP6R3	protein phosphatase 6, regulatory subunit 3	NM_001164160	2091	2340	+
55291	PPP6R3	protein phosphatase 6, regulatory subunit 3	NM_001164160	2571	2720	+
55291	PPP6R3	protein phosphatase 6, regulatory subunit 3	NM_001164160	2941	3113	+
23269	MGA	MGA, MAX dimerization protein	NM_001164273	851	1020	+
23269	MGA	MGA, MAX dimerization protein	NM_001164273	8391	8530	+
23269	MGA	MGA, MAX dimerization protein	NM_001164273	9161	9410	+
2542	SLC37A4	solute carrier family 37 (glucose-6-phosphate transporter), member 4	NM_001164277	21	340	+
2542	SLC37A4	solute carrier family 37 (glucose-6-phosphate transporter), member 4	NM_001164277	552	880	+
2542	SLC37A4	solute carrier family 37 (glucose-6-phosphate transporter), member 4	NM_001164277	2391	2600	+
2317	FLNB	filamin B, beta	NM_001164317	28	200	+
2317	FLNB	filamin B, beta	NM_001164317	861	1060	+
2317	FLNB	filamin B, beta	NM_001164317	3381	3820	+
2317	FLNB	filamin B, beta	NM_001164317	8181	8510	+
2317	FLNB	filamin B, beta	NM_001164317	9391	9552	+
51735	RAPGEF6	Rap guanine nucleotide exchange factor (GEF) 6	NM_001164386	2821	2950	+
51735	RAPGEF6	Rap guanine nucleotide exchange factor (GEF) 6	NM_001164386	4282	4890	+
51735	RAPGEF6	Rap guanine nucleotide exchange factor (GEF) 6	NM_001164386	4991	5388	+
651746	ANKRD33B	ankyrin repeat domain 33B	NM_001164440	1231	1490	+
651746	ANKRD33B	ankyrin repeat domain 33B	NM_001164440	3381	3640	+
651746	ANKRD33B	ankyrin repeat domain 33B	NM_001164440	7801	8040	+
5724	PTAFR	platelet-activating factor receptor	NM_001164723	395	540	+
5724	PTAFR	platelet-activating factor receptor	NM_001164723	621	970	+
5724	PTAFR	platelet-activating factor receptor	NM_001164723	1441	1977	+
5724	PTAFR	platelet-activating factor receptor	NM_001164723	2141	2280	+
393	ARHGAP4	Rho GTPase activating protein 4	NM_001164741	211	320	+
393	ARHGAP4	Rho GTPase activating protein 4	NM_001164741	531	742	+
113444	SMIM12	small integral membrane protein 12	NM_001164824	479	1036	+
330	BIRC3	baculoviral IAP repeat containing 3	NM_001165	741	890	+
330	BIRC3	baculoviral IAP repeat containing 3	NM_001165	2750	3090	+
330	BIRC3	baculoviral IAP repeat containing 3	NM_001165	3201	3580	+
330	BIRC3	baculoviral IAP repeat containing 3	NM_001165	3921	4200	+
330	BIRC3	baculoviral IAP repeat containing 3	NM_001165	4331	4460	+
1605	DAG1	dystroglycan 1 (dystrophin-associated glycoprotein 1)	NM_001165928	1421	1520	+
6241	RRM2	ribonucleotide reductase M2	NM_001165931	1261	1500	+
84667	HES7	hes family bHLH transcription factor 7	NM_001165967	551	680	+
100101467	ZSCAN30	zinc finger and SCAN domain containing 30	NM_001166012	1083	1560	+
100101467	ZSCAN30	zinc finger and SCAN domain containing 30	NM_001166012	1921	2149	+
10908	PNPLA6	patatin-like phospholipase domain containing 6	NM_001166111	232	480	+
10908	PNPLA6	patatin-like phospholipase domain containing 6	NM_001166111	591	790	+
10908	PNPLA6	patatin-like phospholipase domain containing 6	NM_001166111	4430	4565	+
51251	NT5C3A	5'-nucleotidase, cytosolic IIIA	NM_001166118	1121	1470	+
146956	EME1	essential meiotic structure-specific endonuclease 1	NM_001166131	2081	2280	+
4720	NDUFS2	NADH dehydrogenase (ubiquinone) Fe-S protein 2, 49kDa (NADH-coenzyme Q reductase)	NM_001166159	256	480	+
79792	GSDMD	gasdermin D	NM_001166237_2	961	1130	+
79792	GSDMD	gasdermin D	NM_001166237_2	2061	2270	+
29969	MDFIC	MyoD family inhibitor domain containing	NM_001166345	1161	1390	+
29969	MDFIC	MyoD family inhibitor domain containing	NM_001166345	2211	2420	+
55869	HDAC8	histone deacetylase 8	NM_001166419	271	460	+
64743	WDR13	WD repeat domain 13	NM_001166426	161	421	+
64743	WDR13	WD repeat domain 13	NM_001166426	781	920	+
6566	SLC16A1	solute carrier family 16 (monocarboxylate transporter), member 1	NM_001166496	1391	1910	+
6566	SLC16A1	solute carrier family 16 (monocarboxylate transporter), member 1	NM_001166496	2101	2450	+
51744	CD244	CD244 molecule, natural killer cell receptor 2B4	NM_001166663	1701	1940	+
51744	CD244	CD244 molecule, natural killer cell receptor 2B4	NM_001166663	2281	2490	+
5213	PFKM	phosphofructokinase, muscle	NM_001166686	1531	1700	+
331	XIAP	X-linked inhibitor of apoptosis, E3 ubiquitin protein ligase	NM_001167	489	850	+
79886	CAAP1	caspase activity and apoptosis inhibitor 1	NM_001167575	1031	1360	+
84236	RHBDD1	rhomboid domain containing 1	NM_001167608	471	890	+
57176	VARS2	valyl-tRNA synthetase 2, mitochondrial	NM_001167734_5	751	920	+
57176	VARS2	valyl-tRNA synthetase 2, mitochondrial	NM_001167734_5	3311	3610	+
345778	MTX3	metaxin 3	NM_001167741	871	1050	+
10904	BLCAP	bladder cancer associated protein	NM_001167820	1751	2159	+
55206	SBNO1	strawberry notch homolog 1 (Drosophila)	NM_001167856	271	768	+
55206	SBNO1	strawberry notch homolog 1 (Drosophila)	NM_001167856	1781	2000	+
55206	SBNO1	strawberry notch homolog 1 (Drosophila)	NM_001167856	2021	2330	+
55206	SBNO1	strawberry notch homolog 1 (Drosophila)	NM_001167856	4051	4400	+
55206	SBNO1	strawberry notch homolog 1 (Drosophila)	NM_001167856	9211	9410	+
55101	ATP5SL	ATP5S-like	NM_001167867	1181	1380	+
55101	ATP5SL	ATP5S-like	NM_001167867	1641	1764	+
10245	TIMM17B	translocase of inner mitochondrial membrane 17 homolog B (yeast)	NM_001167947	1001	1100	+
3708	ITPR1	inositol 1,4,5-trisphosphate receptor, type 1	NM_001168272	2351	2504	+
3708	ITPR1	inositol 1,4,5-trisphosphate receptor, type 1	NM_001168272	3676	3890	+
3708	ITPR1	inositol 1,4,5-trisphosphate receptor, type 1	NM_001168272	5881	6072	+
3708	ITPR1	inositol 1,4,5-trisphosphate receptor, type 1	NM_001168272	6651	6820	+
3708	ITPR1	inositol 1,4,5-trisphosphate receptor, type 1	NM_001168272	6901	7060	+
3708	ITPR1	inositol 1,4,5-trisphosphate receptor, type 1	NM_001168272	8471	8620	+
9820	CUL7	cullin 7	NM_001168370	301	650	+
9820	CUL7	cullin 7	NM_001168370	721	960	+
9820	CUL7	cullin 7	NM_001168370	1991	2220	+
9820	CUL7	cullin 7	NM_001168370	4311	4520	+
9820	CUL7	cullin 7	NM_001168370	5321	5498	+
256714	MAP7D2	MAP7 domain containing 2	NM_001168465	1301	1988	+
5128	CDK17	cyclin-dependent kinase 17	NM_001170464	2311	2885	+
192111	PGAM5	phosphoglycerate mutase family member 5	NM_001170543	841	1362	+
57680	CHD8	chromodomain helicase DNA binding protein 8	NM_001170629	14	460	+
57680	CHD8	chromodomain helicase DNA binding protein 8	NM_001170629	1111	1254	+
57680	CHD8	chromodomain helicase DNA binding protein 8	NM_001170629	1551	1700	+
57680	CHD8	chromodomain helicase DNA binding protein 8	NM_001170629	5861	6030	+
57680	CHD8	chromodomain helicase DNA binding protein 8	NM_001170629	6081	6480	+
57680	CHD8	chromodomain helicase DNA binding protein 8	NM_001170629	7589	8020	+
9564	BCAR1	breast cancer anti-estrogen resistance 1	NM_001170714	2241	2470	+
284565	NBPF15	neuroblastoma breakpoint family, member 15	NM_001170755	2861	3484	+
728927	ZNF736	zinc finger protein 736	NM_001170905	541	1540	+
728927	ZNF736	zinc finger protein 736	NM_001170905	1571	1725	+
728927	ZNF736	zinc finger protein 736	NM_001170905	6091	6230	+
9189	ZBED1	zinc finger, BED-type containing 1	NM_001171135_2	3791	3930	+
9189	ZBED1	zinc finger, BED-type containing 1	NM_001171135_2	3991	4210	+
9203	ZMYM3	zinc finger, MYM-type 3	NM_001171162	720	1510	+
9203	ZMYM3	zinc finger, MYM-type 3	NM_001171162	4761	5050	+
23125	CAMTA2	calmodulin binding transcription activator 2	NM_001171167	1191	1448	+
23125	CAMTA2	calmodulin binding transcription activator 2	NM_001171167	3051	3310	+
23125	CAMTA2	calmodulin binding transcription activator 2	NM_001171167	4271	4430	+
51271	UBAP1	ubiquitin associated protein 1	NM_001171203	741	1470	+
90411	MCFD2	multiple coagulation factor deficiency 2	NM_001171508	550	1230	+
90411	MCFD2	multiple coagulation factor deficiency 2	NM_001171508	1341	1530	+
7422	VEGFA	vascular endothelial growth factor A	NM_001171623	511	680	+
7422	VEGFA	vascular endothelial growth factor A	NM_001171623	791	890	+
7422	VEGFA	vascular endothelial growth factor A	NM_001171623	2401	2590	+
286144	TRIQK	triple QxxK/R motif containing	NM_001171796	631	790	+
115992	RNF166	ring finger protein 166	NM_001171816	1681	1900	+
115992	RNF166	ring finger protein 166	NM_001171816	2211	2330	+
5467	PPARD	peroxisome proliferator-activated receptor delta	NM_001171818	1681	1910	+
5467	PPARD	peroxisome proliferator-activated receptor delta	NM_001171818	2195	2501	+
4205	MEF2A	myocyte enhancer factor 2A	NM_001171894	591	750	+
4205	MEF2A	myocyte enhancer factor 2A	NM_001171894	1861	2182	+
4205	MEF2A	myocyte enhancer factor 2A	NM_001171894	4779	4980	+
4205	MEF2A	myocyte enhancer factor 2A	NM_001171894	5561	5716	+
91966	CXorf40A	chromosome X open reading frame 40A	NM_001171907	851	1040	+
221416	C6orf223	chromosome 6 open reading frame 223	NM_001171992	121	290	+
221416	C6orf223	chromosome 6 open reading frame 223	NM_001171992	341	1110	+
221416	C6orf223	chromosome 6 open reading frame 223	NM_001171992	2681	2806	+
5828	PEX2	peroxisomal biogenesis factor 2	NM_001172086	301	740	+
5828	PEX2	peroxisomal biogenesis factor 2	NM_001172086	841	990	+
3603	IL16	interleukin 16	NM_001172128	2401	2580	+
3603	IL16	interleukin 16	NM_001172128	2861	3180	+
3055	HCK	HCK proto-oncogene, Src family tyrosine kinase	NM_001172132	41	302	+
3055	HCK	HCK proto-oncogene, Src family tyrosine kinase	NM_001172132	1921	2205	+
81532	MOB2	MOB kinase activator 2	NM_001172223	881	1150	+
81532	MOB2	MOB kinase activator 2	NM_001172223	1251	1420	+
84930	MASTL	microtubule associated serine/threonine kinase-like	NM_001172303	1771	2000	+
573	BAG1	BCL2-associated athanogene	NM_001172415	291	500	+
573	BAG1	BCL2-associated athanogene	NM_001172415	711	880	+
22930	RAB3GAP1	RAB3 GTPase activating protein subunit 1 (catalytic)	NM_001172435	1611	1979	+
22930	RAB3GAP1	RAB3 GTPase activating protein subunit 1 (catalytic)	NM_001172435	2161	2340	+
22930	RAB3GAP1	RAB3 GTPase activating protein subunit 1 (catalytic)	NM_001172435	2861	3247	+
4615	MYD88	myeloid differentiation primary response 88	NM_001172567	1071	1230	+
4615	MYD88	myeloid differentiation primary response 88	NM_001172567	1291	1610	+
79648	MCPH1	microcephalin 1	NM_001172574	1721	1950	+
115703	ARHGAP33	Rho GTPase activating protein 33	NM_001172630	3471	3650	+
10658	CELF1	CUGBP, Elav-like family member 1	NM_001172640	1381	1570	+
10658	CELF1	CUGBP, Elav-like family member 1	NM_001172640	1646	1942	+
10658	CELF1	CUGBP, Elav-like family member 1	NM_001172640	3121	3435	+
10658	CELF1	CUGBP, Elav-like family member 1	NM_001172640	3661	3830	+
10658	CELF1	CUGBP, Elav-like family member 1	NM_001172640	4561	4700	+
10658	CELF1	CUGBP, Elav-like family member 1	NM_001172640	5361	5540	+
10658	CELF1	CUGBP, Elav-like family member 1	NM_001172640	5841	6070	+
10658	CELF1	CUGBP, Elav-like family member 1	NM_001172640	6311	6570	+
57799	RAB40C	RAB40C, member RAS oncogene family	NM_001172663	1161	1310	+
26088	GGA1	golgi-associated, gamma adaptin ear containing, ARF binding protein 1	NM_001172688	2471	2580	+
10102	TSFM	Ts translation elongation factor, mitochondrial	NM_001172696	939	1201	+
1982	EIF4G2	eukaryotic translation initiation factor 4 gamma, 2	NM_001172705	581	789	+
1982	EIF4G2	eukaryotic translation initiation factor 4 gamma, 2	NM_001172705	1961	2220	+
1982	EIF4G2	eukaryotic translation initiation factor 4 gamma, 2	NM_001172705	2641	2820	+
147694	ZNF548	zinc finger protein 548	NM_001172773	698	1140	+
147694	ZNF548	zinc finger protein 548	NM_001172773	1221	1330	+
147694	ZNF548	zinc finger protein 548	NM_001172773	1621	1760	+
147694	ZNF548	zinc finger protein 548	NM_001172773	1811	1920	+
5236	PGM1	phosphoglucomutase 1	NM_001172818	1511	1660	+
5236	PGM1	phosphoglucomutase 1	NM_001172818	1951	2223	+
5160	PDHA1	pyruvate dehydrogenase (lipoamide) alpha 1	NM_001173454	1111	1320	+
55605	KIF21A	kinesin family member 21A	NM_001173464	351	530	+
55605	KIF21A	kinesin family member 21A	NM_001173464	2081	2320	+
55605	KIF21A	kinesin family member 21A	NM_001173464	2691	2900	+
55605	KIF21A	kinesin family member 21A	NM_001173464	3281	3430	+
79649	MAP7D3	MAP7 domain containing 3	NM_001173517	1041	1250	+
6738	TROVE2	TROVE domain family, member 2	NM_001173524	401	620	+
54971	BANP	BTG3 associated nuclear protein	NM_001173543	1931	2100	+
29117	BRD7	bromodomain containing 7	NM_001173984	261	540	+
29117	BRD7	bromodomain containing 7	NM_001173984	841	1140	+
55684	RABL6	RAB, member RAS oncogene family-like 6	NM_001173988	1261	1390	+
55684	RABL6	RAB, member RAS oncogene family-like 6	NM_001173988	2111	2407	+
55684	RABL6	RAB, member RAS oncogene family-like 6	NM_001173988	2661	2890	+
9887	SMG7	SMG7 nonsense mediated mRNA decay factor	NM_001174061	1781	2237	+
9887	SMG7	SMG7 nonsense mediated mRNA decay factor	NM_001174061	2401	2540	+
9887	SMG7	SMG7 nonsense mediated mRNA decay factor	NM_001174061	2631	2900	+
[truncated: 11,046 more rows]
