# Supplementary material for: Evolution of transcript modification by N6-methyladenosine in primates
Source: HighWire-hosted journal article supplement (doi:10.1101/gr.212563.116), 2017-01-04
Supplement: Supplemental_Table_S5.xlsx [file Supplemental_Table_S5.xlsx]

## Sheet: sTable5.C2Peaks
ENSPTRG00000000102	PARK7	parkinson protein 7 [Source:HGNC Symbol;Acc:HGNC:16369]	ENSPTRT00000000234	701	830	+
ENSPTRG00000018957	SNX13	Uncharacterized protein [Source:UniProtKB/TrEMBL;Acc:H2QU81]	ENSPTRT00000035041	2818	3530	+
ENSPTRG00000005696	EFHA1	EF-hand domain family, member A1; Uncharacterized protein [Source:UniProtKB/TrEMBL;Acc:H2Q7A0]	ENSPTRT00000010500	1271	1370	+
ENSPTRG00000013793	USP25	Ubiquitin carboxyl-terminal hydrolase [Source:UniProtKB/TrEMBL;Acc:H2QKV1]	ENSPTRT00000025751	3231	3449	+
ENSPTRG00000013792	NRIP1	Nuclear receptor interacting protein 1; Uncharacterized protein [Source:UniProtKB/TrEMBL;Acc:H2QKV0]	ENSPTRT00000025745	5151	5280	+
ENSPTRG00000003144	AP2A2	adaptor-related protein complex 2, alpha 2 subunit [Source:HGNC Symbol;Acc:HGNC:562]	ENSPTRT00000006010	861	1030	+
ENSPTRG00000005692	SAP18	Sin3A-associated protein, 18kDa [Source:HGNC Symbol;Acc:HGNC:10530]	ENSPTRT00000010491	36	190	+
ENSPTRG00000000101	TNFRSF9	tumor necrosis factor receptor superfamily, member 9 [Source:HGNC Symbol;Acc:HGNC:11924]	ENSPTRT00000000233	1311	1490	+
ENSPTRG00000017043	MSH3	Uncharacterized protein [Source:UniProtKB/TrEMBL;Acc:H2QR62]	ENSPTRT00000073868	3191	3390	+
ENSPTRG00000005694	MRP63	Mitochondrial ribosomal protein 63; Uncharacterized protein [Source:UniProtKB/TrEMBL;Acc:H2Q798]	ENSPTRT00000010497	751	974	+
ENSPTRG00000003153	MOB2	MOB kinase activator 2 [Source:HGNC Symbol;Acc:HGNC:24904]	ENSPTRT00000065816	1081	1240	+
ENSPTRG00000022488	DDX3Y	Pan troglodytes DEAD (Asp-Glu-Ala-Asp) box polypeptide 3, Y-linked (DDX3Y), mRNA. [Source:RefSeq mRNA;Acc:NM_001008986]	ENSPTRT00000041996	3831	3950	+
ENSPTRG00000000091	KLHL21	kelch-like family member 21 [Source:HGNC Symbol;Acc:HGNC:29041]	ENSPTRT00000000215	1251	1380	+
ENSPTRG00000000092	PHF13	PHD finger protein 13; Uncharacterized protein [Source:UniProtKB/TrEMBL;Acc:H2PXX3]	ENSPTRT00000000216	1161	1637	+
ENSPTRG00000003129	DEAF1	Deformed epidermal autoregulatory factor 1; Deformed epidermal autoregulatory factor 1 homolog [Source:UniProtKB/TrEMBL;Acc:H2Q2V5]	ENSPTRT00000005974	2391	2650	+
ENSPTRG00000000093	THAP3	Uncharacterized protein [Source:UniProtKB/TrEMBL;Acc:H2PXX4]	ENSPTRT00000000219	650	990	+
ENSPTRG00000020054	BMP1	Bone morphogenetic protein 1; Uncharacterized protein [Source:UniProtKB/TrEMBL;Acc:H2QVU7]	ENSPTRT00000037161	3205	3490	+
ENSPTRG00000000094	DNAJC11	DnaJ (Hsp40) homolog, subfamily C, member 11 [Source:HGNC Symbol;Acc:HGNC:25570]	ENSPTRT00000000222	2441	2540	+
ENSPTRG00000017047	ZCCHC9	Uncharacterized protein; Zinc finger, CCHC domain containing 9 [Source:UniProtKB/TrEMBL;Acc:H2QR64]	ENSPTRT00000031595	211	470	+
ENSPTRG00000000089	NOL9	Nucleolar protein 9; Serine palmitoyltransferase, long chain base subunit 2; Uncharacterized protein [Source:UniProtKB/TrEMBL;Acc:H2PXX0]	ENSPTRT00000000207	2361	2560	+
ENSPTRG00000000106	RERE	Arginine-glutamic acid dipeptide (RE) repeats; Uncharacterized protein [Source:UniProtKB/TrEMBL;Acc:H2PXY0]	ENSPTRT00000000243	5471	5640	+
ENSPTRG00000003143	CHID1	chitinase domain containing 1 [Source:HGNC Symbol;Acc:HGNC:28474]	ENSPTRT00000006002	2041	2190	+
ENSPTRG00000003138	PNPLA2	patatin-like phospholipase domain containing 2 [Source:HGNC Symbol;Acc:HGNC:30802]	ENSPTRT00000005991	1851	2065	+
ENSPTRG00000018955	AHR	Aryl hydrocarbon receptor; Uncharacterized protein [Source:UniProtKB/TrEMBL;Acc:H2QU80]	ENSPTRT00000035037	3131	3320	+
ENSPTRG00000003140	CD151	CD151 molecule (Raph blood group); Uncharacterized protein [Source:UniProtKB/TrEMBL;Acc:H2Q2W1]	ENSPTRT00000005998	1351	1480	+
ENSPTRG00000000098	VAMP3	Pan troglodytes vesicle-associated membrane protein 3 (cellubrevin) (VAMP3), mRNA. [Source:RefSeq mRNA;Acc:NM_001246583]	ENSPTRT00000000229	1951	2070	+
ENSPTRG00000018959	HDAC9	histone deacetylase 9 [Source:HGNC Symbol;Acc:HGNC:14065]	ENSPTRT00000035045	1641	1884	+
ENSPTRG00000013790	HSPA13	Heat shock protein 70kDa family, member 13; Uncharacterized protein [Source:UniProtKB/TrEMBL;Acc:H2QZS7]	ENSPTRT00000025741	2490	2660	+
ENSPTRG00000005695	ZDHHC20	zinc finger, DHHC-type containing 20 [Source:HGNC Symbol;Acc:HGNC:20749]	ENSPTRT00000010498	1091	1262	+
ENSPTRG00000003123	RASSF7	Ras association (RalGDS/AF-6) domain family (N-terminal) member 7 [Source:HGNC Symbol;Acc:HGNC:1166]	ENSPTRT00000005957	1241	1513	+
ENSPTRG00000003125	PHRF1	PHD and ring finger domains 1 [Source:HGNC Symbol;Acc:HGNC:24351]	ENSPTRT00000005959	3641	3780	+
ENSPTRG00000022487	USP9Y	Pan troglodytes ubiquitin specific peptidase 9, Y-linked (USP9Y), mRNA. [Source:RefSeq mRNA;Acc:NM_001009110]	ENSPTRT00000041991	5835	5953	+
ENSPTRG00000018951	BZW2	Basic leucine zipper and W2 domains 2; Uncharacterized protein [Source:UniProtKB/TrEMBL;Acc:H2QU76]	ENSPTRT00000035033	79	240	+
ENSPTRG00000030844	ZBTB48	Uncharacterized protein; Zinc finger and BTB domain containing 48 [Source:UniProtKB/TrEMBL;Acc:H2PXX2]	ENSPTRT00000000210	2121	2325	+
ENSPTRG00000041621	COX19	cytochrome c oxidase assembly homolog 19 (S. cerevisiae) [Source:HGNC Symbol;Acc:HGNC:28074]	ENSPTRT00000075603	1211	1390	+
ENSPTRG00000040196	GET4	Golgi to ER traffic protein 4 homolog; Uncharacterized protein [Source:UniProtKB/TrEMBL;Acc:H2RI34]	ENSPTRT00000075748	951	1230	+
ENSPTRG00000018833	SUN1	Sad1 and UNC84 domain containing 1; Uncharacterized protein [Source:UniProtKB/TrEMBL;Acc:H2QU30]	ENSPTRT00000034785	2319	2647	+
ENSPTRG00000016674	CCDC127	Coiled-coil domain containing 127; Uncharacterized protein [Source:UniProtKB/TrEMBL;Acc:H2QZX2]	ENSPTRT00000030960	761	920	+
ENSPTRG00000016677	SDHA	Succinate dehydrogenase complex, subunit A, flavoprotein (Fp); Uncharacterized protein [Source:UniProtKB/TrEMBL;Acc:H2R5Q6]	ENSPTRT00000047239	2281	2389	+
ENSPTRG00000016680	EXOC3	Aryl-hydrocarbon receptor repressor; Exocyst complex component 3; Uncharacterized protein [Source:UniProtKB/TrEMBL;Acc:H2QQK3]	ENSPTRT00000030972	751	970	+
ENSPTRG00000018857	FTSJ2	FtsJ homolog 2; Uncharacterized protein [Source:UniProtKB/TrEMBL;Acc:H2QU32]	ENSPTRT00000034828	1381	1500	+
ENSPTRG00000018861	CHST12	Carbohydrate (Chondroitin 4) sulfotransferase 12; Uncharacterized protein [Source:UniProtKB/TrEMBL;Acc:H2QU36]	ENSPTRT00000034840	1101	1499	+
ENSPTRG00000018865	BRAT1	BRCA1-associated ATM activator 1; Uncharacterized protein [Source:UniProtKB/TrEMBL;Acc:H2QU38]	ENSPTRT00000034846	2107	2532	+
ENSPTRG00000016698	CLPTM1L	CLPTM1-like [Source:HGNC Symbol;Acc:HGNC:24308]	ENSPTRT00000050914	1891	2010	+
ENSPTRG00000018868	TTYH3	Tweety homolog 3; Uncharacterized protein [Source:UniProtKB/TrEMBL;Acc:H2QU40]	ENSPTRT00000034854	3681	3900	+
ENSPTRG00000016701	LPCAT1	Uncharacterized protein [Source:UniProtKB/TrEMBL;Acc:H2QQL2]	ENSPTRT00000031031	3201	3399	+
ENSPTRG00000018870	GNA12	Guanine nucleotide binding protein (G protein) alpha 12; Uncharacterized protein [Source:UniProtKB/TrEMBL;Acc:H2QU42]	ENSPTRT00000034857	2991	3200	+
ENSPTRG00000018876	AP5Z1	adaptor-related protein complex 5, zeta 1 subunit [Source:HGNC Symbol;Acc:HGNC:22197]	ENSPTRT00000065281	2281	2420	+
ENSPTRG00000016711	ICE1	interactor of little elongator complex ELL subunit 1 [Source:HGNC Symbol;Acc:HGNC:29154]	ENSPTRT00000031043	5641	5770	+
ENSPTRG00000016713	MED10	Mediator complex subunit 10; Uncharacterized protein [Source:UniProtKB/TrEMBL;Acc:H2QQL9]	ENSPTRT00000031045	431	660	+
ENSPTRG00000033811	UBE2QL1	ubiquitin-conjugating enzyme E2Q family-like 1 [Source:HGNC Symbol;Acc:HGNC:37269]	ENSPTRT00000065618	571	750	+
ENSPTRG00000016715	NSUN2	NOP2/Sun domain family, member 2; Uncharacterized protein [Source:UniProtKB/TrEMBL;Acc:H2R3L8]	ENSPTRT00000045008	2391	2953	+
ENSPTRG00000016717	PAPD7	Uncharacterized protein [Source:UniProtKB/TrEMBL;Acc:H2QQM1]	ENSPTRT00000031049	3461	3670	+
ENSPTRG00000018882	WIPI2	Uncharacterized protein [Source:UniProtKB/TrEMBL;Acc:H2QU47]	ENSPTRT00000034889	1441	1716	+
ENSPTRG00000016721	MTRR	5-methyltetrahydrofolate-homocysteine methyltransferase reductase [Source:HGNC Symbol;Acc:HGNC:7473]	ENSPTRT00000031061	2401	2600	+
ENSPTRG00000019933	FBXO25	Uncharacterized protein [Source:UniProtKB/TrEMBL;Acc:H2QVP4]	ENSPTRT00000036947	351	530	+
ENSPTRG00000016725	CCT5	Chaperonin containing TCP1, subunit 5 (Epsilon); Uncharacterized protein [Source:UniProtKB/TrEMBL;Acc:H2QQM7]	ENSPTRT00000031066	771	960	+
ENSPTRG00000018886	TNRC18	trinucleotide repeat containing 18 [Source:HGNC Symbol;Acc:HGNC:11962]	ENSPTRT00000035540	7461	7650	+
ENSPTRG00000018890	ACTB	Pan troglodytes actin, beta (ACTB), mRNA. [Source:RefSeq mRNA;Acc:NM_001009945]	ENSPTRT00000066712	1171	1530	+
ENSPTRG00000019941	CLN8	ceroid-lipofuscinosis, neuronal 8 (epilepsy, progressive with mental retardation) [Source:HGNC Symbol;Acc:HGNC:2079]	ENSPTRT00000036957	851	1180	+
ENSPTRG00000016727	2015-03-06	Membrane-associated ring finger (C3HC4) 6; Uncharacterized protein [Source:UniProtKB/TrEMBL;Acc:H2QQM9]	ENSPTRT00000031068	3186	3540	+
ENSPTRG00000016729	ANKRD33B	Ankyrin repeat domain 33B; Uncharacterized protein [Source:UniProtKB/TrEMBL;Acc:H2QQN1]	ENSPTRT00000031071	971	1390	+
ENSPTRG00000019946	MCPH1	Pan troglodytes microcephalin 1 (MCPH1), mRNA. [Source:RefSeq mRNA;Acc:NM_001009010]	ENSPTRT00000036980	1741	1904	+
ENSPTRG00000019949	AGPAT5	1-acylglycerol-3-phosphate O-acyltransferase 5 [Source:HGNC Symbol;Acc:HGNC:20886]	ENSPTRT00000036987	2794	3060	+
ENSPTRG00000016735	TRIO	trio Rho guanine nucleotide exchange factor [Source:HGNC Symbol;Acc:HGNC:12303]	ENSPTRT00000031086	8621	9259	+
ENSPTRG00000000009	TNFRSF18	tumor necrosis factor receptor superfamily, member 18 [Source:HGNC Symbol;Acc:HGNC:11914]	ENSPTRT00000000017	1051	1190	+
ENSPTRG00000020006	LONRF1	LON peptidase N-terminal domain and ring finger 1; Uncharacterized protein [Source:UniProtKB/TrEMBL;Acc:H2QVR8]	ENSPTRT00000037064	2341	2520	+
ENSPTRG00000000025	DVL1	Pan troglodytes dishevelled, dsh homolog 1 (Drosophila) (DVL1), mRNA. [Source:RefSeq mRNA;Acc:NM_001012430]	ENSPTRT00000064008	1771	1970	+
ENSPTRG00000020009	DLC1	deleted in liver cancer 1 [Source:HGNC Symbol;Acc:HGNC:2897]	ENSPTRT00000037067	4521	4790	+
ENSPTRG00000041444		Chromosome 7 open reading frame 28A; Chromosome 7 open reading frame 28B; Uncharacterized protein [Source:UniProtKB/TrEMBL;Acc:H2RGW5]	ENSPTRT00000074300	1431	1635	+
ENSPTRG00000000028	CCNL2	cyclin L2 [Source:HGNC Symbol;Acc:HGNC:20570]	ENSPTRT00000047170	1271	1969	+
ENSPTRG00000018920		Uncharacterized protein [Source:UniProtKB/TrEMBL;Acc:H2QU63]	ENSPTRT00000034977	1701	1848	+
ENSPTRG00000040153	ZNF316	zinc finger protein 316 [Source:HGNC Symbol;Acc:HGNC:13843]	ENSPTRT00000076110	411	590	+
ENSPTRG00000018915	ZDHHC4	Uncharacterized protein; Zinc finger, DHHC-type containing 4 [Source:UniProtKB/TrEMBL;Acc:H2QU60]	ENSPTRT00000034957	1141	1451	+
ENSPTRG00000000029	MRPL20	Uncharacterized protein [Source:UniProtKB/TrEMBL;Acc:H2PXT8]	ENSPTRT00000000060	141	250	+
ENSPTRG00000000031	ATAD3B	ATPase family, AAA domain containing 3B [Source:HGNC Symbol;Acc:HGNC:24007]	ENSPTRT00000000068	229	380	+
ENSPTRG00000016736	FAM105A	family with sequence similarity 105, member A [Source:HGNC Symbol;Acc:HGNC:25629]	ENSPTRT00000031092	1311	1600	+
ENSPTRG00000000034	SSU72	SSU72 RNA polymerase II CTD phosphatase homolog; Uncharacterized protein [Source:UniProtKB/TrEMBL;Acc:H2PXU1]	ENSPTRT00000000069	461	650	+
ENSPTRG00000016738	FAM105B	Uncharacterized protein [Source:UniProtKB/TrEMBL;Acc:H2QQN7]	ENSPTRT00000031094	1111	1320	+
ENSPTRG00000000037	SLC35E2B	solute carrier family 35, member E2B [Source:HGNC Symbol;Acc:HGNC:33941]	ENSPTRT00000043775	1577	2388	+
ENSPTRG00000018910	RAC1	Pan troglodytes ras-related C3 botulinum toxin substrate 1 (rho family, small GTP binding protein Rac1) (RAC1), mRNA. [Source:RefSeq mRNA;Acc:NM_001246381]	ENSPTRT00000044585	1091	1370	+
ENSPTRG00000016743	ZNF622	Uncharacterized protein; Zinc finger protein 622 [Source:UniProtKB/TrEMBL;Acc:H2QQP1]	ENSPTRT00000031099	821	940	+
ENSPTRG00000000038	NADK	NAD kinase [Source:HGNC Symbol;Acc:HGNC:29831]	ENSPTRT00000000083	2886	3102	+
ENSPTRG00000028666	FAM220A	family with sequence similarity 220, member A [Source:HGNC Symbol;Acc:HGNC:22422]	ENSPTRT00000055615	791	1040	+
ENSPTRG00000020021	SLC7A2	solute carrier family 7 (cationic amino acid transporter, y+ system), member 2 [Source:HGNC Symbol;Acc:HGNC:11060]	ENSPTRT00000037092	1991	2440	+
ENSPTRG00000018904	EIF2AK1	Eukaryotic translation initiation factor 2-alpha kinase 1; Uncharacterized protein [Source:UniProtKB/TrEMBL;Acc:H2QU55]	ENSPTRT00000034937	1861	2090	+
ENSPTRG00000000049	RER1	RER1 retention in endoplasmic reticulum 1 homolog; Uncharacterized protein [Source:UniProtKB/TrEMBL;Acc:H2PXU7]	ENSPTRT00000000105	1101	1370	+
ENSPTRG00000018903	AIMP2	aminoacyl tRNA synthetase complex-interacting multifunctional protein 2 [Source:HGNC Symbol;Acc:HGNC:20609]	ENSPTRT00000034934	821	1020	+
ENSPTRG00000018902		Uncharacterized protein [Source:UniProtKB/TrEMBL;Acc:H2QU53]	ENSPTRT00000034932	2661	2760	+
ENSPTRG00000016748	BASP1	brain abundant, membrane attached signal protein 1 [Source:HGNC Symbol;Acc:HGNC:957]	ENSPTRT00000031106	512	750	+
ENSPTRG00000000052	PANK4	Pantothenate kinase 4; Uncharacterized protein [Source:UniProtKB/TrEMBL;Acc:H2PXV0]	ENSPTRT00000000114	2211	2639	+
ENSPTRG00000017090	ELL2	Elongation factor, RNA polymerase II, 2; Uncharacterized protein [Source:UniProtKB/TrEMBL;Acc:H2QR91]	ENSPTRT00000031666	3131	3290	+
ENSPTRG00000000053	TNFRSF14	Tumor necrosis factor receptor superfamily, member 14 (Herpesvirus entry mediator); Uncharacterized protein [Source:UniProtKB/TrEMBL;Acc:H2PXV1]	ENSPTRT00000000116	1381	1683	+
ENSPTRG00000017088	GLRX	Pan troglodytes glutaredoxin (thioltransferase) (GLRX), mRNA. [Source:RefSeq mRNA;Acc:NM_001195224]	ENSPTRT00000031664	811	998	+
ENSPTRG00000018897		Uncharacterized protein [Source:UniProtKB/TrEMBL;Acc:H2QU52]	ENSPTRT00000034921	1991	2218	+
ENSPTRG00000020026	PCM1	pericentriolar material 1 [Source:HGNC Symbol;Acc:HGNC:8727]	ENSPTRT00000037105	6431	6573	+
ENSPTRG00000000054	FAM213B	Uncharacterized protein [Source:UniProtKB/TrEMBL;Acc:H2PXV2]	ENSPTRT00000000118	771	1060	+
ENSPTRG00000017083	TTC37	tetratricopeptide repeat domain 37 [Source:HGNC Symbol;Acc:HGNC:23639]	ENSPTRT00000031651	3921	4143	+
ENSPTRG00000020027	ASAH1	Pan troglodytes N-acylsphingosine amidohydrolase (acid ceramidase) 1 (ASAH1), mRNA. [Source:RefSeq mRNA;Acc:NM_001098560]	ENSPTRT00000037110	1678	1955	+
ENSPTRG00000017079	ANKRD32	ankyrin repeat domain 32 [Source:HGNC Symbol;Acc:HGNC:25408]	ENSPTRT00000031642	3038	3476	+
ENSPTRG00000018926	MIOS	Missing oocyte, meiosis regulator, homolog; Uncharacterized protein [Source:UniProtKB/TrEMBL;Acc:H2QU66]	ENSPTRT00000034992	3061	3310	+
ENSPTRG00000018929	GLCCI1	glucocorticoid induced transcript 1 [Source:HGNC Symbol;Acc:HGNC:18713]	ENSPTRT00000034995	2156	2442	+
ENSPTRG00000000064	WRAP73	Uncharacterized protein; WD repeat containing, antisense to TP73 [Source:UniProtKB/TrEMBL;Acc:H2PXV9]	ENSPTRT00000000145	1418	1617	+
ENSPTRG00000017072	ARRDC3	Arrestin domain containing 3; Uncharacterized protein [Source:UniProtKB/TrEMBL;Acc:H2QR82]	ENSPTRT00000031632	1831	2080	+
ENSPTRG00000018934	NDUFA4	Pan troglodytes NADH dehydrogenase (ubiquinone) 1 alpha subcomplex, 4, 9kDa (NDUFA4), nuclear gene encoding mitochondrial protein, mRNA. [Source:RefSeq mRNA;Acc:NM_001079924]	ENSPTRT00000035004	411	540	+
ENSPTRG00000018935	PHF14	PHD finger protein 14; Uncharacterized protein [Source:UniProtKB/TrEMBL;Acc:H2RCM0]	ENSPTRT00000065934	1051	1260	+
ENSPTRG00000000068	LRRC47	leucine rich repeat containing 47 [Source:HGNC Symbol;Acc:HGNC:29207]	ENSPTRT00000000149	831	1070	+
ENSPTRG00000000069	CEP104	centrosomal protein 104kDa [Source:HGNC Symbol;Acc:HGNC:24866]	ENSPTRT00000000152	3601	3710	+
ENSPTRG00000017069	LYSMD3	LysM, putative peptidoglycan-binding, domain containing 3; Uncharacterized protein [Source:UniProtKB/TrEMBL;Acc:H2QR80]	ENSPTRT00000031624	561	1070	+
ENSPTRG00000003103	BET1L	Bet1 golgi vesicular membrane trafficking protein-like [Source:HGNC Symbol;Acc:HGNC:19348]	ENSPTRT00000005916	2631	2757	+
ENSPTRG00000024207	C1H1orf174	Pan troglodytes chromosome 1 open reading frame 174 ortholog (C1H1orf174), mRNA. [Source:RefSeq mRNA;Acc:NM_001251898]	ENSPTRT00000042678	831	1010	+
ENSPTRG00000024214	MEF2C	Uncharacterized protein [Source:UniProtKB/TrEMBL;Acc:H2R001]	ENSPTRT00000049896	3721	3835	+
ENSPTRG00000003104	RIC8A	Resistance to inhibitors of cholinesterase 8 homolog A; Uncharacterized protein [Source:UniProtKB/TrEMBL;Acc:H2Q2U3]	ENSPTRT00000005919	1781	2280	+
ENSPTRG00000020040	ATP6V1B2	ATPase, H+ transporting, lysosomal 56/58kDa, V1 subunit B2; Uncharacterized protein [Source:UniProtKB/TrEMBL;Acc:H2QVT8]	ENSPTRT00000037134	2894	3040	+
ENSPTRG00000003110	IFITM2	Pan troglodytes interferon induced transmembrane protein 2 (IFITM2), mRNA. [Source:RefSeq mRNA;Acc:NM_001198767]	ENSPTRT00000005933	281	380	+
ENSPTRG00000003111	IFITM1	Pan troglodytes interferon induced transmembrane protein 1 (IFITM1), mRNA. [Source:RefSeq mRNA;Acc:NM_001198758]	ENSPTRT00000055771	173	350	+
ENSPTRG00000020043	DOK2	docking protein 2, 56kDa [Source:HGNC Symbol;Acc:HGNC:2991]	ENSPTRT00000037139	1141	1320	+
ENSPTRG00000017063	CCNH	Pan troglodytes cyclin H (CCNH), mRNA. [Source:RefSeq mRNA;Acc:NM_001082413]	ENSPTRT00000074061	1071	1253	+
ENSPTRG00000020044	XPO7	Exportin 7; Uncharacterized protein [Source:UniProtKB/TrEMBL;Acc:H2QVU1]	ENSPTRT00000037141	3801	3919	+
ENSPTRG00000000078	RNF207	ring finger protein 207 [Source:HGNC Symbol;Acc:HGNC:32947]	ENSPTRT00000059688	3011	3280	+
ENSPTRG00000017062	RASA1	RAS p21 protein activator (GTPase activating protein) 1; Uncharacterized protein [Source:UniProtKB/TrEMBL;Acc:H2QR74]	ENSPTRT00000031616	3331	3670	+
ENSPTRG00000003117	PTDSS2	phosphatidylserine synthase 2 [Source:HGNC Symbol;Acc:HGNC:15463]	ENSPTRT00000005943	1411	1550	+
ENSPTRG00000000079	ICMT	Isoprenylcysteine carboxyl methyltransferase; Uncharacterized protein [Source:UniProtKB/TrEMBL;Acc:H2PXW4]	ENSPTRT00000000176	2825	3110	+
ENSPTRG00000003118	RNH1	Pan troglodytes ribonuclease/angiogenin inhibitor 1 (RNH1), mRNA. [Source:RefSeq mRNA;Acc:NM_001009060]	ENSPTRT00000062390	1591	1740	+
ENSPTRG00000000082	GPR153	G protein-coupled receptor 153 [Source:HGNC Symbol;Acc:HGNC:23618]	ENSPTRT00000000180	3501	3730	+
ENSPTRG00000024080	MPHOSPH8	M-phase phosphoprotein 8; Uncharacterized protein [Source:UniProtKB/TrEMBL;Acc:H2R0N3]	ENSPTRT00000044611	901	1277	+
ENSPTRG00000026567	COX7C	Cytochrome c oxidase subunit 7C, mitochondrial [Source:UniProtKB/Swiss-Prot;Acc:P60025]	ENSPTRT00000031614	1453	1580	+
ENSPTRG00000020048	FAM160B2	family with sequence similarity 160, member B2 [Source:HGNC Symbol;Acc:HGNC:16492]	ENSPTRT00000042625	3391	3680	+
ENSPTRG00000005680	ZMYM2	Uncharacterized protein; Zinc finger, MYM-type 2 [Source:UniProtKB/TrEMBL;Acc:H2RAA7]	ENSPTRT00000060330	4301	4506	+
ENSPTRG00000000112	SLC2A5	Pan troglodytes solute carrier family 2 (facilitated glucose/fructose transporter), member 5 (SLC2A5), mRNA. [Source:RefSeq mRNA;Acc:NM_001246591]	ENSPTRT00000000254	2045	2310	+
ENSPTRG00000020058	SLC39A14	solute carrier family 39 (zinc transporter), member 14 [Source:HGNC Symbol;Acc:HGNC:20858]	ENSPTRT00000046938	1469	1816	+
ENSPTRG00000013797	BTG3	BTG family, member 3 [Source:HGNC Symbol;Acc:HGNC:1132]	ENSPTRT00000025758	1451	1590	+
ENSPTRG00000020059	PPP3CC	Serine/threonine-protein phosphatase [Source:UniProtKB/TrEMBL;Acc:H2QVV0]	ENSPTRT00000037173	1741	1970	+
ENSPTRG00000018962	TWISTNB	TWIST neighbor; Uncharacterized protein [Source:UniProtKB/TrEMBL;Acc:H2QU84]	ENSPTRT00000035050	622	1018	+
ENSPTRG00000000113	H6PD	Hexose-6-phosphate dehydrogenase (Glucose 1-dehydrogenase); Uncharacterized protein [Source:UniProtKB/TrEMBL;Acc:H2PXY5]	ENSPTRT00000000258	2941	3070	+
ENSPTRG00000013798	C21orf91	chromosome 21 open reading frame 91 [Source:HGNC Symbol;Acc:HGNC:16459]	ENSPTRT00000025760	801	1090	+
ENSPTRG00000000114	SPSB1	SplA/ryanodine receptor domain and SOCS box containing 1; Uncharacterized protein [Source:UniProtKB/TrEMBL;Acc:H2R2W2]	ENSPTRT00000046470	1271	1460	+
ENSPTRG00000000115	SLC25A33	Solute carrier family 25, member 33; Uncharacterized protein [Source:UniProtKB/TrEMBL;Acc:H2PXY6]	ENSPTRT00000000260	1296	1429	+
ENSPTRG00000000120	PIK3CD	phosphatidylinositol-4,5-bisphosphate 3-kinase, catalytic subunit delta [Source:HGNC Symbol;Acc:HGNC:8977]	ENSPTRT00000000269	3267	3875	+
GID	Symbol	Description	RefSeq_NM	Start	End	Strand
ENSPTRG00000005705	MIPEP	mitochondrial intermediate peptidase [Source:HGNC Symbol;Acc:HGNC:7104]	ENSPTRT00000010513	41	230	+
ENSPTRG00000013807	MRPL39	mitochondrial ribosomal protein L39 [Source:HGNC Symbol;Acc:HGNC:14027]	ENSPTRT00000025772	871	986	+
ENSPTRG00000032583	SPATA13	Uncharacterized protein [Source:UniProtKB/TrEMBL;Acc:H2RDZ0]	ENSPTRT00000067983	4421	4597	+
ENSPTRG00000020065	CCAR2	cell cycle and apoptosis regulator 2 [Source:HGNC Symbol;Acc:HGNC:23360]	ENSPTRT00000037185	3841	3941	+
ENSPTRG00000014033	IL17RA	interleukin 17 receptor A [Source:HGNC Symbol;Acc:HGNC:5985]	ENSPTRT00000026205	2311	2600	+
ENSPTRG00000018970	SP4	Sp4 transcription factor; Uncharacterized protein [Source:UniProtKB/TrEMBL;Acc:H2QU88]	ENSPTRT00000035061	2361	2570	+
ENSPTRG00000005711	PARP4	Poly (ADP-ribose) polymerase family, member 4; Uncharacterized protein [Source:UniProtKB/TrEMBL;Acc:H2Q7A7]	ENSPTRT00000010521	5061	5285	+
ENSPTRG00000000121	CLSTN1	Calsyntenin 1; Uncharacterized protein [Source:UniProtKB/TrEMBL;Acc:H2PXY9]	ENSPTRT00000000270	3921	4227	+
ENSPTRG00000013809	ATP5J	ATP synthase-coupling factor 6, mitochondrial [Source:UniProtKB/TrEMBL;Acc:H2QKV8]	ENSPTRT00000025774	321	444	+
ENSPTRG00000003177	CD81	Pan troglodytes CD81 molecule (CD81), mRNA. [Source:RefSeq mRNA;Acc:NM_001009023]	ENSPTRT00000006088	1031	1160	+
ENSPTRG00000007526	SNRNP25	Small nuclear ribonucleoprotein 25kDa (U11/U12); Uncharacterized protein [Source:UniProtKB/TrEMBL;Acc:H2QA66]	ENSPTRT00000013875	1441	1658	+
ENSPTRG00000013810	GABPA	GA binding protein transcription factor, alpha subunit 60kDa; Uncharacterized protein [Source:UniProtKB/TrEMBL;Acc:H2R0L6]	ENSPTRT00000046827	1541	2030	+
ENSPTRG00000013811	APP	Pan troglodytes amyloid beta (A4) precursor protein (APP), mRNA. [Source:RefSeq mRNA;Acc:NM_001013018]	ENSPTRT00000025781	1411	1610	+
ENSPTRG00000017015	AP3B1	Adaptor-related protein complex 3, beta 1 subunit; Uncharacterized protein [Source:UniProtKB/TrEMBL;Acc:H2QR49]	ENSPTRT00000031544	2181	2393	+
ENSPTRG00000018981	FAM126A	family with sequence similarity 126, member A [Source:HGNC Symbol;Acc:HGNC:24587]	ENSPTRT00000035093	1651	1820	+
ENSPTRG00000007528	MPG	N-methylpurine-DNA glycosylase [Source:HGNC Symbol;Acc:HGNC:7211]	ENSPTRT00000045376	451	620	+
ENSPTRG00000028747	NAP1L4	Nucleosome assembly protein 1-like 4; Uncharacterized protein [Source:UniProtKB/TrEMBL;Acc:H2Q6I4]	ENSPTRT00000009637	1641	1780	+
ENSPTRG00000000126	UBE4B	ubiquitination factor E4B [Source:HGNC Symbol;Acc:HGNC:12500]	ENSPTRT00000000279	5751	5870	+
ENSPTRG00000020070	TNFRSF10B	tumor necrosis factor receptor superfamily, member 10b [Source:HGNC Symbol;Acc:HGNC:11905]	ENSPTRT00000037195	1217	1809	+
ENSPTRG00000003188	CARS	Cysteinyl-tRNA synthetase; Uncharacterized protein [Source:UniProtKB/TrEMBL;Acc:H2R5M8]	ENSPTRT00000055735	2188	2733	+
ENSPTRG00000017011	WDR41	Uncharacterized protein; WD repeat domain 41 [Source:UniProtKB/TrEMBL;Acc:H2QR46]	ENSPTRT00000031538	2331	2519	+
ENSPTRG00000018983	NUPL2	Nucleoporin like 2; Uncharacterized protein [Source:UniProtKB/TrEMBL;Acc:H2QU93]	ENSPTRT00000035099	1321	1537	+
ENSPTRG00000007535		Uncharacterized protein [Source:UniProtKB/TrEMBL;Acc:H2RB46]	ENSPTRT00000062456	2541	2750	+
ENSPTRG00000014040	BCL2L13	BCL2-like 13 (Apoptosis facilitator); Uncharacterized protein [Source:UniProtKB/TrEMBL;Acc:H2RE23]	ENSPTRT00000068157	1291	1470	+
ENSPTRG00000020073	TNFRSF10D	tumor necrosis factor receptor superfamily, member 10d, decoy with truncated death domain [Source:HGNC Symbol;Acc:HGNC:11907]	ENSPTRT00000037198	1071	1219	+
ENSPTRG00000017008	AGGF1	Angiogenic factor with G patch and FHA domains 1; Uncharacterized protein [Source:UniProtKB/TrEMBL;Acc:H2QR44]	ENSPTRT00000031529	2141	2614	+
ENSPTRG00000020074	TNFRSF10A	Tumor necrosis factor receptor superfamily, member 10a; Uncharacterized protein [Source:UniProtKB/TrEMBL;Acc:H2QVW1]	ENSPTRT00000037199	1341	1578	+
ENSPTRG00000014046	PEX26	peroxisomal biogenesis factor 26 [Source:HGNC Symbol;Acc:HGNC:22965]	ENSPTRT00000026237	1271	1670	+
ENSPTRG00000007537	AXIN1	Uncharacterized protein [Source:UniProtKB/TrEMBL;Acc:H2R1H5]	ENSPTRT00000049407	661	760	+
ENSPTRG00000007541	NME4	NME/NM23 nucleoside diphosphate kinase 4 [Source:HGNC Symbol;Acc:HGNC:7852]	ENSPTRT00000013898	481	630	+
ENSPTRG00000007540	TMEM8A	transmembrane protein 8A [Source:HGNC Symbol;Acc:HGNC:17205]	ENSPTRT00000013897	2149	2390	+
ENSPTRG00000020075	CHMP7	CHMP family, member 7; Uncharacterized protein [Source:UniProtKB/TrEMBL;Acc:H2QVW2]	ENSPTRT00000037201	1384	1740	+
ENSPTRG00000013819	LTN1	listerin E3 ubiquitin protein ligase 1 [Source:HGNC Symbol;Acc:HGNC:13082]	ENSPTRT00000025792	5111	5290	+
ENSPTRG00000018986	IGF2BP3	Insulin-like growth factor 2 mRNA binding protein 3; Uncharacterized protein [Source:UniProtKB/TrEMBL;Acc:H2QU96]	ENSPTRT00000035103	3091	3430	+
ENSPTRG00000014047	TUBA8	tubulin, alpha 8 [Source:HGNC Symbol;Acc:HGNC:12410]	ENSPTRT00000026238	1281	1470	+
ENSPTRG00000005718	MTMR6	Myotubularin related protein 6; Uncharacterized protein [Source:UniProtKB/TrEMBL;Acc:H2Q7B1]	ENSPTRT00000010532	3471	3668	+
ENSPTRG00000020076	R3HCC1	R3H domain and coiled-coil containing 1; Uncharacterized protein [Source:UniProtKB/TrEMBL;Acc:H2QVW3]	ENSPTRT00000037202	701	1180	+
ENSPTRG00000014048	USP18	Ubiquitin carboxyl-terminal hydrolase [Source:UniProtKB/TrEMBL;Acc:H2QL77]	ENSPTRT00000026239	1461	1605	+
ENSPTRG00000017004	F2R	Coagulation factor II (Thrombin) receptor; Uncharacterized protein [Source:UniProtKB/TrEMBL;Acc:H2QR41]	ENSPTRT00000031524	2311	2834	+
ENSPTRG00000007543	RAB11FIP3	RAB11 family interacting protein 3 (class II) [Source:HGNC Symbol;Acc:HGNC:17224]	ENSPTRT00000050303	3791	3900	+
ENSPTRG00000018988	TRA2A	Transformer 2 alpha homolog; Uncharacterized protein [Source:UniProtKB/TrEMBL;Acc:H2QU97]	ENSPTRT00000035105	1081	1230	+
ENSPTRG00000005719	NUPL1	Nucleoporin like 1; Uncharacterized protein [Source:UniProtKB/TrEMBL;Acc:H2Q7B2]	ENSPTRT00000010533	1841	2100	+
ENSPTRG00000020078	ENTPD4	Ectonucleoside triphosphate diphosphohydrolase 4; Uncharacterized protein [Source:UniProtKB/TrEMBL;Acc:H2QVW4]	ENSPTRT00000037204	1341	1580	+
ENSPTRG00000018989	CCDC126	coiled-coil domain containing 126 [Source:HGNC Symbol;Acc:HGNC:22398]	ENSPTRT00000035106	491	700	+
ENSPTRG00000007546	RAB40C	RAB40C, member RAS oncogene family; Uncharacterized protein [Source:UniProtKB/TrEMBL;Acc:H2QA75]	ENSPTRT00000013907	921	1220	+
ENSPTRG00000021653	WWC3	WWC family member 3 [Source:HGNC Symbol;Acc:HGNC:29237]	ENSPTRT00000040148	1321	1679	+
ENSPTRG00000014053	DGCR2	DiGeorge syndrome critical region gene 2; Uncharacterized protein [Source:UniProtKB/TrEMBL;Acc:H2QL79]	ENSPTRT00000026245	3721	3940	+
ENSPTRG00000000131	DFFA	DNA fragmentation factor, 45kDa, alpha polypeptide [Source:HGNC Symbol;Acc:HGNC:2772]	ENSPTRT00000000302	1141	1300	+
ENSPTRG00000013821	USP16	Ubiquitin carboxyl-terminal hydrolase [Source:UniProtKB/TrEMBL;Acc:H2QKW5]	ENSPTRT00000025795	1651	2050	+
ENSPTRG00000003200	NUP98	nucleoporin 98kDa [Source:HGNC Symbol;Acc:HGNC:8068]	ENSPTRT00000049272	5641	5830	+
ENSPTRG00000007547	C16orf13	chromosome 16 open reading frame 13 [Source:HGNC Symbol;Acc:HGNC:14141]	ENSPTRT00000065807	651	770	+
ENSPTRG00000000132	PEX14	Peroxisomal biogenesis factor 14; Uncharacterized protein [Source:UniProtKB/TrEMBL;Acc:H2PXZ8]	ENSPTRT00000000303	891	1187	+
ENSPTRG00000007549	WDR90	WD repeat domain 90 [Source:HGNC Symbol;Acc:HGNC:26960]	ENSPTRT00000013920	4371	4610	+
ENSPTRG00000014055	DGCR14	DiGeorge syndrome critical region gene 14; Uncharacterized protein [Source:UniProtKB/TrEMBL;Acc:H2QL81]	ENSPTRT00000026248	1421	1725	+
ENSPTRG00000013824	BACH1	BTB and CNC homology 1, basic leucine zipper transcription factor 1; Uncharacterized protein [Source:UniProtKB/TrEMBL;Acc:H2QKW7]	ENSPTRT00000025801	2211	2370	+
ENSPTRG00000000136	TARDBP	TAR DNA binding protein; Uncharacterized protein [Source:UniProtKB/TrEMBL;Acc:H2PY00]	ENSPTRT00000000310	2461	2684	+
ENSPTRG00000003204	STIM1	Stromal interaction molecule 1; Uncharacterized protein [Source:UniProtKB/TrEMBL;Acc:H2Q2X9]	ENSPTRT00000006138	2221	2340	+
ENSPTRG00000016997	POLK	Polymerase (DNA directed) kappa; Uncharacterized protein [Source:UniProtKB/TrEMBL;Acc:H2R452]	ENSPTRT00000045956	1681	1840	+
ENSPTRG00000003207	RRM1	Ribonucleoside-diphosphate reductase [Source:UniProtKB/TrEMBL;Acc:H2Q2Y0]	ENSPTRT00000006141	3051	3150	+
ENSPTRG00000021662	MSL3	male-specific lethal 3 homolog (Drosophila) [Source:HGNC Symbol;Acc:HGNC:7370]	ENSPTRT00000049748	301	530	+
ENSPTRG00000007553	STUB1	STIP1 homology and U-box containing protein 1, E3 ubiquitin protein ligase; Uncharacterized protein [Source:UniProtKB/TrEMBL;Acc:H2QA80]	ENSPTRT00000013925	1411	1585	+
ENSPTRG00000014057	SLC25A1	Solute carrier family 25 (Mitochondrial carrier citrate transporter), member 1; Uncharacterized protein [Source:UniProtKB/TrEMBL;Acc:H2QL82]	ENSPTRT00000026250	1491	1610	+
ENSPTRG00000000138	SRM	Spermidine synthase; Uncharacterized protein [Source:UniProtKB/TrEMBL;Acc:H2PY02]	ENSPTRT00000000316	1111	1270	+
ENSPTRG00000014564	TRNT1	Uncharacterized protein; tRNA nucleotidyl transferase, CCA-adding, 1 [Source:UniProtKB/TrEMBL;Acc:H2QLZ1]	ENSPTRT00000027239	1261	1490	+
ENSPTRG00000016996	COL4A3BP	collagen, type IV, alpha 3 (Goodpasture antigen) binding protein [Source:HGNC Symbol;Acc:HGNC:2205]	ENSPTRT00000031512	1131	1320	+
ENSPTRG00000018995	OSBPL3	oxysterol binding protein-like 3 [Source:HGNC Symbol;Acc:HGNC:16370]	ENSPTRT00000035120	6601	6710	+
ENSPTRG00000000140	EXOSC10	Exosome component 10; Uncharacterized protein [Source:UniProtKB/TrEMBL;Acc:H2R4F4]	ENSPTRT00000043364	2331	2527	+
ENSPTRG00000005723	RNF6	Ring finger protein (C3H2C3 type) 6; Uncharacterized protein [Source:UniProtKB/TrEMBL;Acc:H2Q7B4]	ENSPTRT00000010539	1231	1430	+
ENSPTRG00000005724	CDK8	Cyclin-dependent kinase 8; Uncharacterized protein [Source:UniProtKB/TrEMBL;Acc:H2Q7B5]	ENSPTRT00000010543	1	190	+
ENSPTRG00000007561	NARFL	Nuclear prelamin A recognition factor-like; Uncharacterized protein [Source:UniProtKB/TrEMBL;Acc:H2QA85]	ENSPTRT00000013944	1241	1660	+
ENSPTRG00000013848	SCAF4	SR-related CTD-associated factor 4; Uncharacterized protein [Source:UniProtKB/TrEMBL;Acc:H2QKY4]	ENSPTRT00000025827	3741	3990	+
ENSPTRG00000014570	ITPR1	inositol 1,4,5-trisphosphate receptor, type 1 [Source:HGNC Symbol;Acc:HGNC:6180]	ENSPTRT00000027252	8782	8950	+
ENSPTRG00000016994	HMGCR	3-hydroxy-3-methylglutaryl-CoA reductase; Uncharacterized protein [Source:UniProtKB/TrEMBL;Acc:H2QR35]	ENSPTRT00000031507	3111	3390	+
ENSPTRG00000005727	USP12	Ubiquitin carboxyl-terminal hydrolase [Source:UniProtKB/TrEMBL;Acc:H2Q7B8]	ENSPTRT00000010548	3673	3880	+
ENSPTRG00000018997	C7orf31	chromosome 7 open reading frame 31 [Source:HGNC Symbol;Acc:HGNC:21722]	ENSPTRT00000035123	2101	2313	+
ENSPTRG00000000142	MTOR	mechanistic target of rapamycin (serine/threonine kinase) [Source:HGNC Symbol;Acc:HGNC:3942]	ENSPTRT00000000323	8201	8441	+
ENSPTRG00000019000	NFE2L3	Nuclear factor (Erythroid-derived 2)-like 3; Uncharacterized protein [Source:UniProtKB/TrEMBL;Acc:H2QUA7]	ENSPTRT00000035126	2380	2600	+
ENSPTRG00000021673	RAB9A	RAB9A, member RAS oncogene family; Uncharacterized protein [Source:UniProtKB/TrEMBL;Acc:H2QYA8]	ENSPTRT00000040187	441	570	+
ENSPTRG00000007565	RPUSD1	RNA pseudouridylate synthase domain containing 1; Uncharacterized protein [Source:UniProtKB/TrEMBL;Acc:H2QA88]	ENSPTRT00000013953	911	1381	+
ENSPTRG00000021675	OFD1	oral-facial-digital syndrome 1 [Source:HGNC Symbol;Acc:HGNC:2567]	ENSPTRT00000040191	2931	3190	+
ENSPTRG00000014060	HIRA	HIR histone cell cycle regulation defective homolog A; Uncharacterized protein [Source:UniProtKB/TrEMBL;Acc:H2QL84]	ENSPTRT00000026254	3551	3854	+
ENSPTRG00000005732	MTIF3	mitochondrial translational initiation factor 3 [Source:HGNC Symbol;Acc:HGNC:29788]	ENSPTRT00000010554	1877	2068	+
ENSPTRG00000013852	C21ORF108	Uncharacterized protein [Source:UniProtKB/TrEMBL;Acc:H2QKY5]	ENSPTRT00000025833	6941	7240	+
ENSPTRG00000016989	GFM2	G elongation factor, mitochondrial 2; Uncharacterized protein [Source:UniProtKB/TrEMBL;Acc:H2QR31]	ENSPTRT00000031500	2641	2820	+
ENSPTRG00000040665	TRIM34	Pan troglodytes tripartite motif containing 34 (TRIM34), mRNA. [Source:RefSeq mRNA;Acc:NM_001205177]	ENSPTRT00000006206	671	800	+
ENSPTRG00000003258	TRIM5	Pan troglodytes tripartite motif containing 5 (TRIM5), mRNA. [Source:RefSeq mRNA;Acc:NM_001012650]	ENSPTRT00000006209	771	1010	+
ENSPTRG00000000147	FBXO44	F-box protein 44 [Source:HGNC Symbol;Acc:HGNC:24847]	ENSPTRT00000000334	1621	1850	+
ENSPTRG00000003259	TRIM22	Pan troglodytes tripartite motif containing 22 (TRIM22), mRNA. [Source:RefSeq mRNA;Acc:NM_001113396]	ENSPTRT00000048054	671	950	+
ENSPTRG00000019007	SKAP2	Src kinase associated phosphoprotein 2; Uncharacterized protein [Source:UniProtKB/TrEMBL;Acc:H2QUB2]	ENSPTRT00000035142	2271	2425	+
ENSPTRG00000016988	HEXB	Beta-hexosaminidase [Source:UniProtKB/TrEMBL;Acc:H2QR30]	ENSPTRT00000031497	1661	1824	+
ENSPTRG00000000149	MAD2L2	MAD2 mitotic arrest deficient-like 2; Uncharacterized protein [Source:UniProtKB/TrEMBL;Acc:H2PY08]	ENSPTRT00000000336	571	929	+
ENSPTRG00000038881	PRKX	Pan troglodytes protein kinase, X-linked (PRKX), mRNA. [Source:RefSeq mRNA;Acc:NM_001193662]	ENSPTRT00000074297	1121	1282	+
ENSPTRG00000003281	FAM160A2	family with sequence similarity 160, member A2 [Source:HGNC Symbol;Acc:HGNC:25378]	ENSPTRT00000006234	2511	2710	+
ENSPTRG00000005742	PAN3	PAN3 poly(A) specific ribonuclease subunit homolog; Uncharacterized protein [Source:UniProtKB/TrEMBL;Acc:H2RA81]	ENSPTRT00000060266	4711	4810	+
ENSPTRG00000023787	SYNJ1	synaptojanin 1 [Source:HGNC Symbol;Acc:HGNC:11503]	ENSPTRT00000045636	4491	5040	+
ENSPTRG00000021677	GEMIN8	Gem (Nuclear organelle) associated protein 8; Uncharacterized protein [Source:UniProtKB/TrEMBL;Acc:H2QYB2]	ENSPTRT00000040195	741	900	+
ENSPTRG00000019024	HIBADH	3-hydroxyisobutyrate dehydrogenase; Uncharacterized protein [Source:UniProtKB/TrEMBL;Acc:H2R5F7]	ENSPTRT00000035166	1691	1910	+
ENSPTRG00000003285	SMPD1	Sphingomyelin phosphodiesterase 1, acid lysosomal; Uncharacterized protein [Source:UniProtKB/TrEMBL;Acc:H2Q319]	ENSPTRT00000006240	681	1090	+
ENSPTRG00000019025	TAX1BP1	Tax1 binding protein 1; Uncharacterized protein [Source:UniProtKB/TrEMBL;Acc:H2R5F6]	ENSPTRT00000035167	1711	1995	+
ENSPTRG00000014571	BHLHE40	Basic helix-loop-helix family, member e40; Uncharacterized protein [Source:UniProtKB/TrEMBL;Acc:H2R8H1]	ENSPTRT00000027253	1361	1605	+
ENSPTRG00000014572	ARL8B	Uncharacterized protein [Source:UniProtKB/TrEMBL;Acc:H2QLZ6]	ENSPTRT00000027254	1871	2033	+
ENSPTRG00000007589	TSR3	TSR3, 20S rRNA accumulation, homolog (S. cerevisiae) [Source:HGNC Symbol;Acc:HGNC:14175]	ENSPTRT00000014004	656	820	+
ENSPTRG00000003290	TRIM3	Tripartite motif-containing 3; Uncharacterized protein [Source:UniProtKB/TrEMBL;Acc:H2R2V6]	ENSPTRT00000048436	2406	2710	+
ENSPTRG00000014068	GNB1L	Guanine nucleotide binding protein (G protein), beta polypeptide 1-like; Uncharacterized protein [Source:UniProtKB/TrEMBL;Acc:H2QL90]	ENSPTRT00000026272	1081	1450	+
ENSPTRG00000003291	ARFIP2	ADP-ribosylation factor interacting protein 2; Uncharacterized protein [Source:UniProtKB/TrEMBL;Acc:H2Q322]	ENSPTRT00000006252	1088	1300	+
ENSPTRG00000000158	PLOD1	procollagen-lysine, 2-oxoglutarate 5-dioxygenase 1 [Source:HGNC Symbol;Acc:HGNC:9081]	ENSPTRT00000000352	2231	3000	+
ENSPTRG00000013865	IFNAR2	Interferon (Alpha, beta and omega) receptor 2; Uncharacterized protein [Source:UniProtKB/TrEMBL;Acc:H2RAJ3]	ENSPTRT00000025857	1301	1870	+
ENSPTRG00000007592	C16orf91	chromosome 16 open reading frame 91 [Source:HGNC Symbol;Acc:HGNC:27558]	ENSPTRT00000014009	541	650	+
ENSPTRG00000004507	KDM5A	Uncharacterized protein [Source:UniProtKB/TrEMBL;Acc:H2RBQ9]	ENSPTRT00000064569	4601	5420	+
ENSPTRG00000005750	SLC7A1	Solute carrier family 7 (Cationic amino acid transporter, y+ system), member 1; Uncharacterized protein [Source:UniProtKB/TrEMBL;Acc:H2Q7D2]	ENSPTRT00000010579	6431	6592	+
ENSPTRG00000016982	UTP15	UTP15, U3 small nucleolar ribonucleoprotein, homolog; Uncharacterized protein [Source:UniProtKB/TrEMBL;Acc:H2QR27]	ENSPTRT00000031490	1629	1955	+
ENSPTRG00000039378	C22H22ORF29	Pan troglodytes chromosome 22 open reading frame 29 homolog (C22H22orf29), mRNA. [Source:RefSeq mRNA;Acc:NM_001243967]	ENSPTRT00000066846	441	650	+
ENSPTRG00000007594	CLCN7	Chloride channel 7; Uncharacterized protein [Source:UniProtKB/TrEMBL;Acc:H2QAA1]	ENSPTRT00000014011	2946	3621	+
ENSPTRG00000016981	ANKRA2	Ankyrin repeat, family A (RFXANK-like), 2; Uncharacterized protein [Source:UniProtKB/TrEMBL;Acc:H2QR26]	ENSPTRT00000031489	701	820	+
ENSPTRG00000003292	FXC1	Fracture callus 1 homolog; Uncharacterized protein [Source:UniProtKB/TrEMBL;Acc:H2Q323]	ENSPTRT00000006253	292	463	+
ENSPTRG00000000159	MFN2	Mitofusin 2; Uncharacterized protein [Source:UniProtKB/TrEMBL;Acc:H2PY17]	ENSPTRT00000000354	4231	4380	+
ENSPTRG00000003295	DNHD1	dynein heavy chain domain 1 [Source:HGNC Symbol;Acc:HGNC:26532]	ENSPTRT00000006257	8401	8720	+
ENSPTRG00000021693	ZRSR2	zinc finger (CCCH type), RNA-binding motif and serine/arginine rich 2 [Source:HGNC Symbol;Acc:HGNC:23019]	ENSPTRT00000046719	1311	1465	+
ENSPTRG00000016979	BTF3	Basic transcription factor 3; Uncharacterized protein [Source:UniProtKB/TrEMBL;Acc:H2QR25]	ENSPTRT00000031486	921	1050	+
ENSPTRG00000005753	KATNAL1	Katanin p60 subunit A-like 1; Uncharacterized protein [Source:UniProtKB/TrEMBL;Acc:H2Q7D4]	ENSPTRT00000010584	471	743	+
ENSPTRG00000013866	IL10RB	interleukin 10 receptor, beta [Source:HGNC Symbol;Acc:HGNC:5965]	ENSPTRT00000025858	961	1060	+
ENSPTRG00000013867	IFNAR1	Interferon (Alpha, beta and omega) receptor 1; Uncharacterized protein [Source:UniProtKB/TrEMBL;Acc:H2QKY9]	ENSPTRT00000025859	2091	2245	+
ENSPTRG00000005756	USPL1	Ubiquitin specific peptidase like 1; Uncharacterized protein [Source:UniProtKB/TrEMBL;Acc:H2RA78]	ENSPTRT00000010588	3541	3678	+
ENSPTRG00000014070	COMT	Catechol-O-methyltransferase; Uncharacterized protein [Source:UniProtKB/TrEMBL;Acc:H2QL91]	ENSPTRT00000026282	1091	1281	+
ENSPTRG00000000160	IIP45	Pan troglodytes migration and invasion inhibitory protein (MIIP), mRNA. [Source:RefSeq mRNA;Acc:NM_001145656]	ENSPTRT00000000355	1701	1800	+
ENSPTRG00000013868	IFNGR2	Interferon gamma receptor 2 (Interferon gamma transducer 1); Uncharacterized protein [Source:UniProtKB/TrEMBL;Acc:H2QKZ0]	ENSPTRT00000025860	1551	1920	+
ENSPTRG00000021700	SYAP1	Synapse associated protein 1; Uncharacterized protein [Source:UniProtKB/TrEMBL;Acc:H2QYC6]	ENSPTRT00000040241	1011	1278	+
ENSPTRG00000014585	THUMPD3	THUMP domain containing 3 [Source:HGNC Symbol;Acc:HGNC:24493]	ENSPTRT00000027272	596	789	+
ENSPTRG00000005760	HSPH1	Heat shock 105kDa/110kDa protein 1; Uncharacterized protein [Source:UniProtKB/TrEMBL;Acc:H2Q7D9]	ENSPTRT00000010595	2801	2995	+
ENSPTRG00000014586	SETD5	SET domain containing 5 [Source:HGNC Symbol;Acc:HGNC:25566]	ENSPTRT00000065633	3911	4320	+
ENSPTRG00000004513	WNK1	Pan troglodytes WNK lysine deficient protein kinase 1 (WNK1), mRNA. [Source:RefSeq mRNA;Acc:NM_001185048]	ENSPTRT00000008355	8761	8940	+
ENSPTRG00000019034	SCRN1	secernin 1 [Source:HGNC Symbol;Acc:HGNC:22192]	ENSPTRT00000035182	4961	5100	+
ENSPTRG00000016972	TNPO1	Transportin 1; Uncharacterized protein [Source:UniProtKB/TrEMBL;Acc:H2QR21]	ENSPTRT00000031475	3278	3529	+
ENSPTRG00000023231	MTMR14	myotubularin related protein 14 [Source:HGNC Symbol;Acc:HGNC:26190]	ENSPTRT00000042203	1	160	+
ENSPTRG00000021701	TXLNG	Pan troglodytes taxilin gamma (TXLNG), mRNA. [Source:RefSeq mRNA;Acc:NM_001251862]	ENSPTRT00000040243	631	1366	+
ENSPTRG00000003297	RRP8	Ribosomal RNA processing 8, methyltransferase, homolog; Uncharacterized protein [Source:UniProtKB/TrEMBL;Acc:H2Q324]	ENSPTRT00000006259	711	920	+
ENSPTRG00000013871	GART	Phosphoribosylglycinamide formyltransferase, phosphoribosylglycinamide synthetase, phosphoribosylaminoimidazole synthetase; Uncharacterized protein [Source:UniProtKB/TrEMBL;Acc:H2R3B3]	ENSPTRT00000044093	2991	3350	+
ENSPTRG00000000161	TNFRSF8	tumor necrosis factor receptor superfamily, member 8 [Source:HGNC Symbol;Acc:HGNC:11923]	ENSPTRT00000000357	1721	2080	+
ENSPTRG00000003298	ILK	Integrin-linked kinase; Uncharacterized protein [Source:UniProtKB/TrEMBL;Acc:H2Q325]	ENSPTRT00000006260	1641	1740	+
ENSPTRG00000007596	TELO2	telomere maintenance 2 [Source:HGNC Symbol;Acc:HGNC:29099]	ENSPTRT00000014013	1997	2342	+
ENSPTRG00000014072	TANGO2	transport and golgi organization 2 homolog (Drosophila) [Source:HGNC Symbol;Acc:HGNC:25439]	ENSPTRT00000026291	791	1000	+
ENSPTRG00000000164	TNFRSF1B	Uncharacterized protein [Source:UniProtKB/TrEMBL;Acc:H2PY20]	ENSPTRT00000000361	3172	3464	+
ENSPTRG00000004514	RAD52	Uncharacterized protein [Source:UniProtKB/TrEMBL;Acc:H2R128]	ENSPTRT00000042149	1371	1719	+
ENSPTRG00000000165	VPS13D	vacuolar protein sorting 13 homolog D (S. cerevisiae) [Source:HGNC Symbol;Acc:HGNC:23595]	ENSPTRT00000043064	14271	14430	+
ENSPTRG00000014073	ptr-mir-1306	ptr-mir-1306 [Source:miRBase;Acc:MI0008525]	ENSPTRT00000026294	2951	3180	+
ENSPTRG00000014592	BRPF1	Uncharacterized protein [Source:UniProtKB/TrEMBL;Acc:H2R8G7]	ENSPTRT00000058577	701	1040	+
ENSPTRG00000007602	CRAMP1L	Crm, cramped-like (Drosophila) [Source:HGNC Symbol;Acc:HGNC:14122]	ENSPTRT00000014023	781	970	+
ENSPTRG00000013872	SON	SON DNA binding protein [Source:HGNC Symbol;Acc:HGNC:11183]	ENSPTRT00000060585	5261	5550	+
ENSPTRG00000016968	PTCD2	Pan troglodytes pentatricopeptide repeat domain 2 (PTCD2), mRNA. [Source:RefSeq mRNA;Acc:NM_001246655]	ENSPTRT00000031471	1711	1890	+
ENSPTRG00000034459	HN1L	hematological and neurological expressed 1-like [Source:HGNC Symbol;Acc:HGNC:14137]	ENSPTRT00000060422	956	1120	+
ENSPTRG00000019042	GARS	glycyl-tRNA synthetase [Source:HGNC Symbol;Acc:HGNC:4162]	ENSPTRT00000035197	2442	2740	+
ENSPTRG00000014077	ZDHHC8	Pan troglodytes zinc finger, DHHC-type containing 8 (ZDHHC8), mRNA. [Source:RefSeq mRNA;Acc:NM_001038656]	ENSPTRT00000026304	1551	1740	+
ENSPTRG00000007603	MAPK8IP3	mitogen-activated protein kinase 8 interacting protein 3 [Source:HGNC Symbol;Acc:HGNC:6884]	ENSPTRT00000047895	5141	5538	+
ENSPTRG00000014594	CAMK1	Calcium/calmodulin-dependent protein kinase I; Uncharacterized protein [Source:UniProtKB/TrEMBL;Acc:H2QM08]	ENSPTRT00000027298	1031	1220	+
ENSPTRG00000016967	MRPS27	Mitochondrial ribosomal protein S27; Uncharacterized protein [Source:UniProtKB/TrEMBL;Acc:H2QR18]	ENSPTRT00000031470	1041	1320	+
ENSPTRG00000003299	TPP1	Pan troglodytes tripeptidyl peptidase I (TPP1), mRNA. [Source:RefSeq mRNA;Acc:NM_001013007]	ENSPTRT00000006261	2261	2480	+
ENSPTRG00000034273	DONSON	Pan troglodytes downstream neighbor of SON (DONSON), mRNA. [Source:RefSeq mRNA;Acc:NM_001246554]	ENSPTRT00000025870	1943	2070	+
ENSPTRG00000013874	CRYZL1	Crystallin, zeta (Quinone reductase)-like 1; Uncharacterized protein [Source:UniProtKB/TrEMBL;Acc:H2QKZ3]	ENSPTRT00000025874	1251	1450	+
ENSPTRG00000003301	MRPL17	Mitochondrial ribosomal protein L17; Uncharacterized protein [Source:UniProtKB/TrEMBL;Acc:H2Q327]	ENSPTRT00000006267	591	789	+
ENSPTRG00000014083	ZNF74	zinc finger protein 74 [Source:HGNC Symbol;Acc:HGNC:13144]	ENSPTRT00000067837	2131	2270	+
ENSPTRG00000034246		Uncharacterized protein [Source:UniProtKB/TrEMBL;Acc:H2RBI7]	ENSPTRT00000064204	2361	2711	+
ENSPTRG00000000167	DHRS3	Dehydrogenase/reductase (SDR family) member 3; Uncharacterized protein [Source:UniProtKB/TrEMBL;Acc:H2PY21]	ENSPTRT00000000369	1441	1660	+
ENSPTRG00000016956		Small EDRK-rich factor 1A (Telomeric); Uncharacterized protein [Source:UniProtKB/TrEMBL;Acc:H2R089]	ENSPTRT00000043426	1473	1595	+
ENSPTRG00000007606	MRPS34	mitochondrial ribosomal protein S34 [Source:HGNC Symbol;Acc:HGNC:16618]	ENSPTRT00000014033	891	990	+
ENSPTRG00000016955	SMN1	Survival of motor neuron 1, telomeric; Uncharacterized protein [Source:UniProtKB/TrEMBL;Acc:H2QR14]	ENSPTRT00000031451	34	170	+
ENSPTRG00000004518	FBXL14	F-box and leucine-rich repeat protein 14 [Source:HGNC Symbol;Acc:HGNC:28624]	ENSPTRT00000008367	901	1161	+
ENSPTRG00000007607	EME2	essential meiotic structure-specific endonuclease subunit 2 [Source:HGNC Symbol;Acc:HGNC:27289]	ENSPTRT00000014034	4991	5190	+
ENSPTRG00000014601	JAGN1	Jagunal homolog 1; Uncharacterized protein [Source:UniProtKB/TrEMBL;Acc:H2QM11]	ENSPTRT00000027316	901	1140	+
ENSPTRG00000003315	PPFIBP2	PTPRF interacting protein, binding protein 2 (liprin beta 2) [Source:HGNC Symbol;Acc:HGNC:9250]	ENSPTRT00000006287	3131	3380	+
ENSPTRG00000004520	ADIPOR2	Adiponectin receptor 2; Uncharacterized protein [Source:UniProtKB/TrEMBL;Acc:H2R337]	ENSPTRT00000045614	3123	3547	+
ENSPTRG00000014090	PI4KA	phosphatidylinositol 4-kinase, catalytic, alpha [Source:HGNC Symbol;Acc:HGNC:8983]	ENSPTRT00000049744	6401	6692	+
ENSPTRG00000005768	N4BP2L1	NEDD4 binding protein 2-like 1; Uncharacterized protein [Source:UniProtKB/TrEMBL;Acc:H2Q7E3]	ENSPTRT00000010611	531	917	+
ENSPTRG00000007608	SPSB3	SplA/ryanodine receptor domain and SOCS box containing 3; Uncharacterized protein [Source:UniProtKB/TrEMBL;Acc:H2QAA9]	ENSPTRT00000014036	1371	1540	+
ENSPTRG00000016953	GTF2H2	General transcription factor IIH, polypeptide 2, 44kDa; General transcription factor IIH, polypeptide 2C; General transcription factor IIH, polypeptide 2D; Uncharacterized protein [Source:UniProtKB/TrEMBL;Acc:H2QR13]	ENSPTRT00000031443	1341	1510	+
ENSPTRG00000005771	PDS5B	Uncharacterized protein [Source:UniProtKB/TrEMBL;Acc:H2Q7E5]	ENSPTRT00000010618	4367	4650	+
ENSPTRG00000007609	NUBP2	Nucleotide binding protein 2; Uncharacterized protein [Source:UniProtKB/TrEMBL;Acc:H2QAB0]	ENSPTRT00000014038	1191	1376	+
ENSPTRG00000000185	PRDM2	PR domain containing 2, with ZNF domain [Source:HGNC Symbol;Acc:HGNC:9347]	ENSPTRT00000068143	3611	3740	+
ENSPTRG00000003326	EIF3F	Pan troglodytes eukaryotic translation initiation factor 3, subunit F (EIF3F), mRNA. [Source:RefSeq mRNA;Acc:NM_001110812]	ENSPTRT00000006300	1071	1236	+
ENSPTRG00000004525	DCP1B	Uncharacterized protein [Source:UniProtKB/TrEMBL;Acc:H2Q572]	ENSPTRT00000008377	1001	1160	+
ENSPTRG00000000200	CASP9	Caspase [Source:UniProtKB/TrEMBL;Acc:H2PY35]	ENSPTRT00000000424	1531	1758	+
ENSPTRG00000005773	STARD13	StAR-related lipid transfer (START) domain containing 13 [Source:HGNC Symbol;Acc:HGNC:19164]	ENSPTRT00000010622	3351	3450	+
ENSPTRG00000009890	RNMT	mRNA cap guanine-N7 methyltransferase [Source:UniProtKB/TrEMBL;Acc:H2R6V8]	ENSPTRT00000056739	113	570	+
ENSPTRG00000007621	TBL3	transducin (beta)-like 3 [Source:HGNC Symbol;Acc:HGNC:11587]	ENSPTRT00000014053	2381	2567	+
ENSPTRG00000000201	DNAJC16	DnaJ (Hsp40) homolog, subfamily C, member 16; Uncharacterized protein [Source:UniProtKB/TrEMBL;Acc:H2PY36]	ENSPTRT00000000425	3121	3260	+
ENSPTRG00000009889	FAM210A	family with sequence similarity 210, member A [Source:HGNC Symbol;Acc:HGNC:28346]	ENSPTRT00000018164	1651	1750	+
ENSPTRG00000016950	RAD17	RAD17 homolog (S. pombe) [Source:HGNC Symbol;Acc:HGNC:9807]	ENSPTRT00000031436	2232	2450	+
ENSPTRG00000023007	LDLRAD4	low density lipoprotein receptor class A domain containing 4 [Source:HGNC Symbol;Acc:HGNC:1224]	ENSPTRT00000049903	1211	1430	+
ENSPTRG00000014609	FANCD2	Fanconi anemia, complementation group D2 [Source:HGNC Symbol;Acc:HGNC:3585]	ENSPTRT00000027333	4266	4366	+
ENSPTRG00000014094	CRKL	Uncharacterized protein; V-crk sarcoma virus CT10 oncogene homolog (Avian)-like [Source:UniProtKB/TrEMBL;Acc:H2R472]	ENSPTRT00000050467	1731	1880	+
ENSPTRG00000014095	AIFM3	Uncharacterized protein [Source:UniProtKB/TrEMBL;Acc:H2QLA2]	ENSPTRT00000026336	2201	2350	+
ENSPTRG00000009886	CEP192	centrosomal protein 192kDa [Source:HGNC Symbol;Acc:HGNC:25515]	ENSPTRT00000018160	4611	4750	+
ENSPTRG00000000205	PLEKHM2	Pleckstrin homology domain containing, family M (With RUN domain) member 2; Uncharacterized protein [Source:UniProtKB/TrEMBL;Acc:H2PY39]	ENSPTRT00000000435	1041	1637	+
ENSPTRG00000007625	ZNF598	zinc finger protein 598 [Source:HGNC Symbol;Acc:HGNC:28079]	ENSPTRT00000014061	2361	2540	+
ENSPTRG00000003340	TMEM9B	TMEM9 domain family, member B; Uncharacterized protein [Source:UniProtKB/TrEMBL;Acc:H2Q355]	ENSPTRT00000006330	691	983	+
ENSPTRG00000021735	MBTPS2	Uncharacterized protein [Source:UniProtKB/TrEMBL;Acc:H2R4T0]	ENSPTRT00000040333	1561	1750	+
ENSPTRG00000019058	AVL9	AVL9 homolog; Uncharacterized protein [Source:UniProtKB/TrEMBL;Acc:H2QUE4]	ENSPTRT00000035230	2151	2300	+
ENSPTRG00000014097	LZTR1	leucine-zipper-like transcription regulator 1 [Source:HGNC Symbol;Acc:HGNC:6742]	ENSPTRT00000026342	3881	4296	+
ENSPTRG00000031311	TSC2	tuberous sclerosis 2 [Source:HGNC Symbol;Acc:HGNC:12363]	ENSPTRT00000051068	5231	5500	+
ENSPTRG00000030309	VHL	von Hippel-Lindau tumor suppressor, E3 ubiquitin protein ligase [Source:HGNC Symbol;Acc:HGNC:12687]	ENSPTRT00000058562	401	580	+
ENSPTRG00000000210	SPEN	spen family transcriptional repressor [Source:HGNC Symbol;Acc:HGNC:17575]	ENSPTRT00000000444	6101	6280	+
ENSPTRG00000014616	TATDN2	TatD DNase domain containing 2; Uncharacterized protein [Source:UniProtKB/TrEMBL;Acc:H2QM20]	ENSPTRT00000027343	1521	1720	+
ENSPTRG00000000211	ZBTB17	Uncharacterized protein; Zinc finger and BTB domain containing 17 [Source:UniProtKB/TrEMBL;Acc:H2PY43]	ENSPTRT00000000445	2491	2714	+
ENSPTRG00000031093			ENSPTRT00000014072	1881	2040	+
ENSPTRG00000019063	KBTBD2	Kelch repeat and BTB (POZ) domain containing 2; Uncharacterized protein [Source:UniProtKB/TrEMBL;Acc:H2QUE5]	ENSPTRT00000035237	2311	2550	+
ENSPTRG00000009885	SEH1L	SEH1-like; Uncharacterized protein [Source:UniProtKB/TrEMBL;Acc:H2QEA7]	ENSPTRT00000018158	1311	1620	+
ENSPTRG00000016946	CDK7	Cyclin-dependent kinase 7; Uncharacterized protein [Source:UniProtKB/TrEMBL;Acc:H2QR08]	ENSPTRT00000031421	1091	1321	+
ENSPTRG00000019066	FKBP9	FK506 binding protein 9, 63 kDa; Uncharacterized protein [Source:UniProtKB/TrEMBL;Acc:H2QUE6]	ENSPTRT00000035240	1691	1860	+
ENSPTRG00000003345	DENND5A	DENN/MADD domain containing 5A; Uncharacterized protein [Source:UniProtKB/TrEMBL;Acc:H2Q359]	ENSPTRT00000006336	3931	4256	+
ENSPTRG00000014098	THAP7	THAP domain containing 7; Uncharacterized protein [Source:UniProtKB/TrEMBL;Acc:H2QLA4]	ENSPTRT00000026343	919	1230	+
ENSPTRG00000007635	TRAF7	TNF receptor-associated factor 7; Uncharacterized protein [Source:UniProtKB/TrEMBL;Acc:H2QAC5]	ENSPTRT00000014086	3181	3510	+
ENSPTRG00000019068	RP9	Retinitis pigmentosa 9 (Autosomal dominant); Uncharacterized protein [Source:UniProtKB/TrEMBL;Acc:H2QUE7]	ENSPTRT00000035243	511	670	+
ENSPTRG00000009884	PTPN2	Tyrosine-protein phosphatase non-receptor type [Source:UniProtKB/TrEMBL;Acc:H2QEA6]	ENSPTRT00000018156	1021	1342	+
ENSPTRG00000013886	CBR1	Carbonyl reductase 1; Uncharacterized protein [Source:UniProtKB/TrEMBL;Acc:H2QKZ8]	ENSPTRT00000025898	851	1075	+
ENSPTRG00000011810			ENSPTRT00000021980	1	140	+
ENSPTRG00000016943	CENPH	Centromere protein H; Uncharacterized protein [Source:UniProtKB/TrEMBL;Acc:H2QR06]	ENSPTRT00000031416	211	390	+
ENSPTRG00000007637	MLST8	MTOR associated protein, LST8 homolog; Uncharacterized protein [Source:UniProtKB/TrEMBL;Acc:H2QAC7]	ENSPTRT00000014090	1261	1650	+
ENSPTRG00000021740	ACOT9	Acyl-CoA thioesterase 9; Uncharacterized protein [Source:UniProtKB/TrEMBL;Acc:H2QYE6]	ENSPTRT00000040341	1521	1678	+
ENSPTRG00000009883	PSMG2	proteasome (prosome, macropain) assembly chaperone 2 [Source:HGNC Symbol;Acc:HGNC:24929]	ENSPTRT00000018152	611	730	+
ENSPTRG00000009881	SPIRE1	spire-type actin nucleation factor 1 [Source:HGNC Symbol;Acc:HGNC:30622]	ENSPTRT00000018148	2511	2670	+
ENSPTRG00000014114	UBE2L3	ubiquitin-conjugating enzyme E2L 3 [Source:HGNC Symbol;Acc:HGNC:12488]	ENSPTRT00000026369	1411	1672	+
ENSPTRG00000028713	IPO7	Importin 7; Uncharacterized protein [Source:UniProtKB/TrEMBL;Acc:H2R5K6]	ENSPTRT00000055692	4923	5120	+
ENSPTRG00000016941	SLC30A5	solute carrier family 30 (zinc transporter), member 5 [Source:HGNC Symbol;Acc:HGNC:19089]	ENSPTRT00000031411	2401	2788	+
ENSPTRG00000013890	MORC3	MORC family CW-type zinc finger 3; Uncharacterized protein [Source:UniProtKB/TrEMBL;Acc:H2QL01]	ENSPTRT00000025905	1801	2450	+
ENSPTRG00000009879	AFG3L2	AFG3 ATPase family gene 3-like 2; Uncharacterized protein [Source:UniProtKB/TrEMBL;Acc:H2QEA1]	ENSPTRT00000018144	2691	3033	+
ENSPTRG00000014117	SDF2L1	Stromal cell-derived factor 2-like 1; Uncharacterized protein [Source:UniProtKB/TrEMBL;Acc:H2QLB2]	ENSPTRT00000026373	640	870	+
ENSPTRG00000021741	SAT1	Spermidine/spermine N1-acetyltransferase 1; Uncharacterized protein [Source:UniProtKB/TrEMBL;Acc:H2QYE7]	ENSPTRT00000040343	571	766	+
ENSPTRG00000014118	PPIL2	Peptidylprolyl isomerase (Cyclophilin)-like 2; Uncharacterized protein [Source:UniProtKB/TrEMBL;Acc:H2QLB3]	ENSPTRT00000026374	2441	2660	+
ENSPTRG00000013891	CHAF1B	Chromatin assembly factor 1, subunit B (P60); Uncharacterized protein [Source:UniProtKB/TrEMBL;Acc:H2QL02]	ENSPTRT00000025906	1911	2050	+
ENSPTRG00000007641	E4F1	Uncharacterized protein [Source:UniProtKB/TrEMBL;Acc:H2R112]	ENSPTRT00000014096	1931	2290	+
ENSPTRG00000021742	APOO	Apolipoprotein O; Uncharacterized protein [Source:UniProtKB/TrEMBL;Acc:H2QYE8]	ENSPTRT00000040346	924	1111	+
ENSPTRG00000009878	TUBB6	tubulin, beta 6 class V [Source:HGNC Symbol;Acc:HGNC:20776]	ENSPTRT00000018143	1511	1830	+
ENSPTRG00000016940	PIK3R1	Phosphoinositide-3-kinase, regulatory subunit 1 (Alpha); Uncharacterized protein [Source:UniProtKB/TrEMBL;Acc:H2QR04]	ENSPTRT00000031409	2651	2914	+
ENSPTRG00000014625	ATG7	autophagy related 7 [Source:HGNC Symbol;Acc:HGNC:16935]	ENSPTRT00000027364	1821	2024	+
ENSPTRG00000019074	DPY19L1	dpy-19-like 1 (C. elegans) [Source:HGNC Symbol;Acc:HGNC:22205]	ENSPTRT00000036207	2031	2230	+
ENSPTRG00000021744	KLHL15	Uncharacterized protein [Source:UniProtKB/TrEMBL;Acc:H2R2P3]	ENSPTRT00000051043	1481	1630	+
ENSPTRG00000003350	WEE1	Uncharacterized protein; WEE1 homolog [Source:UniProtKB/TrEMBL;Acc:H2Q362]	ENSPTRT00000006344	181	380	+
ENSPTRG00000021747	ZFX	Uncharacterized protein [Source:UniProtKB/TrEMBL;Acc:H2QYE9]	ENSPTRT00000040360	1741	2484	+
ENSPTRG00000021750	PDK3	Pyruvate dehydrogenase kinase, isozyme 3; Uncharacterized protein [Source:UniProtKB/TrEMBL;Acc:H2QYF0]	ENSPTRT00000040365	1231	1390	+
ENSPTRG00000009872	MPPE1	Metallophosphoesterase 1; Uncharacterized protein [Source:UniProtKB/TrEMBL;Acc:H2QE96]	ENSPTRT00000018132	1878	2102	+
ENSPTRG00000019078	HERPUD2	HERPUD family member 2; Uncharacterized protein [Source:UniProtKB/TrEMBL;Acc:H2QUF1]	ENSPTRT00000035257	111	433	+
ENSPTRG00000005782	SPG20	Spastic paraplegia 20 (Troyer syndrome); Uncharacterized protein [Source:UniProtKB/TrEMBL;Acc:H2R0R5]	ENSPTRT00000046749	2521	2630	+
ENSPTRG00000019080	2015-09-07	Pan troglodytes septin 7 (SEPT7), transcript variant 2, mRNA. [Source:RefSeq mRNA;Acc:NM_001197121]	ENSPTRT00000062117	1747	1980	+
ENSPTRG00000016936	SREK1	Splicing regulatory glutamine/lysine-rich protein 1; Uncharacterized protein [Source:UniProtKB/TrEMBL;Acc:H2QR01]	ENSPTRT00000031402	1681	1900	+
ENSPTRG00000013897	PIGP	phosphatidylinositol glycan anchor biosynthesis, class P [Source:HGNC Symbol;Acc:HGNC:3046]	ENSPTRT00000025916	391	562	+
ENSPTRG00000016935	ERBB2IP	Erbb2 interacting protein; Uncharacterized protein [Source:UniProtKB/TrEMBL;Acc:H2QR00]	ENSPTRT00000031396	4261	4471	+
ENSPTRG00000003355	AMPD3	Adenosine monophosphate deaminase 3; Uncharacterized protein [Source:UniProtKB/TrEMBL;Acc:H2Q364]	ENSPTRT00000006353	2451	2850	+
ENSPTRG00000007647	ABCA3	ATP-binding cassette, sub-family A (ABC1), member 3 [Source:HGNC Symbol;Acc:HGNC:33]	ENSPTRT00000014106	6074	6598	+
ENSPTRG00000013898	TTC3	tetratricopeptide repeat domain 3 [Source:HGNC Symbol;Acc:HGNC:12393]	ENSPTRT00000025918	7571	7700	+
ENSPTRG00000000225	FBXO42	F-box protein 42; Uncharacterized protein [Source:UniProtKB/TrEMBL;Acc:H2PY50]	ENSPTRT00000000465	2041	2402	+
ENSPTRG00000014120	MAPK1	Mitogen-activated protein kinase 1; Uncharacterized protein [Source:UniProtKB/TrEMBL;Acc:H2QLB4]	ENSPTRT00000026378	2811	2940	+
ENSPTRG00000000226	C1ORF144	Uncharacterized protein [Source:UniProtKB/TrEMBL;Acc:H2PY51]	ENSPTRT00000000466	581	854	+
ENSPTRG00000000228	NECAP2	NECAP endocytosis associated 2; Uncharacterized protein [Source:UniProtKB/TrEMBL;Acc:H2PY52]	ENSPTRT00000000470	1681	1890	+
ENSPTRG00000014634	MKRN2	Makorin ring finger protein 2; Uncharacterized protein [Source:UniProtKB/TrEMBL;Acc:H2QM29]	ENSPTRT00000027385	1611	1730	+
ENSPTRG00000014122	TOP3B	DNA topoisomerase [Source:UniProtKB/TrEMBL;Acc:H2R4A2]	ENSPTRT00000042233	2561	2820	+
ENSPTRG00000009866	NAPG	N-ethylmaleimide-sensitive factor attachment protein, gamma; Uncharacterized protein [Source:UniProtKB/TrEMBL;Acc:H2QE91]	ENSPTRT00000018119	1021	1237	+
ENSPTRG00000014635	RAF1	Uncharacterized protein [Source:UniProtKB/TrEMBL;Acc:H2QM30]	ENSPTRT00000027387	2441	2775	+
ENSPTRG00000016934	NLN	neurolysin (metallopeptidase M3 family) [Source:HGNC Symbol;Acc:HGNC:16058]	ENSPTRT00000031390	2211	2370	+
ENSPTRG00000009864	VAPA	Uncharacterized protein; VAMP (Vesicle-associated membrane protein)-associated protein A, 33kDa [Source:UniProtKB/TrEMBL;Acc:H2QE89]	ENSPTRT00000018117	1681	1790	+
ENSPTRG00000007649	CCNF	Cyclin F; Uncharacterized protein [Source:UniProtKB/TrEMBL;Acc:H2RDP3]	ENSPTRT00000067576	4031	4140	+
ENSPTRG00000004529	FKBP4	FK506 binding protein 4, 59kDa [Source:HGNC Symbol;Acc:HGNC:3720]	ENSPTRT00000008389	1451	1570	+
ENSPTRG00000005790	EXOSC8	exosome component 8 [Source:HGNC Symbol;Acc:HGNC:17035]	ENSPTRT00000060225	931	1123	+
ENSPTRG00000013900	DSCR3	Down syndrome critical region gene 3 [Source:HGNC Symbol;Acc:HGNC:3044]	ENSPTRT00000064063	1551	1930	+
ENSPTRG00000023779	CTR9	CTR9, Paf1/RNA polymerase II complex component [Source:HGNC Symbol;Acc:HGNC:16850]	ENSPTRT00000050189	2449	3440	+
ENSPTRG00000009861	RAB31	Uncharacterized protein [Source:UniProtKB/TrEMBL;Acc:H2R191]	ENSPTRT00000072662	1841	2160	+
ENSPTRG00000003362	EIF4G2	eukaryotic translation initiation factor 4 gamma, 2 [Source:HGNC Symbol;Acc:HGNC:3297]	ENSPTRT00000006361	2501	2700	+
ENSPTRG00000013901	DYRK1A	Dual-specificity tyrosine-(Y)-phosphorylation regulated kinase 1A; Uncharacterized protein [Source:UniProtKB/TrEMBL;Acc:H2QL08]	ENSPTRT00000025924	5141	5300	+
ENSPTRG00000009860	PPP4R1	Uncharacterized protein [Source:UniProtKB/TrEMBL;Acc:H2R6V1]	ENSPTRT00000018112	2873	3449	+
ENSPTRG00000016931	TRIM23	tripartite motif containing 23 [Source:HGNC Symbol;Acc:HGNC:660]	ENSPTRT00000031384	1640	1740	+
ENSPTRG00000000241	ATP13A2	ATPase type 13A2 [Source:HGNC Symbol;Acc:HGNC:30213]	ENSPTRT00000000499	3241	3520	+
ENSPTRG00000021792	CYBB	cytochrome b-245, beta polypeptide [Source:HGNC Symbol;Acc:HGNC:2578]	ENSPTRT00000040454	3175	3364	+
ENSPTRG00000004535	RHNO1	RAD9-HUS1-RAD1 interacting nuclear orphan 1 [Source:HGNC Symbol;Acc:HGNC:28206]	ENSPTRT00000008400	1521	1710	+
ENSPTRG00000004536	TULP3	Uncharacterized protein [Source:UniProtKB/TrEMBL;Acc:H2R7L6]	ENSPTRT00000008403	1	160	+
ENSPTRG00000016930	PPWD1	peptidylprolyl isomerase domain and WD repeat containing 1 [Source:HGNC Symbol;Acc:HGNC:28954]	ENSPTRT00000031382	661	902	+
ENSPTRG00000007653	ATP6V0C	ATPase, H+ transporting, lysosomal 16kDa, V0 subunit c; Uncharacterized protein [Source:UniProtKB/TrEMBL;Acc:H2QAD7]	ENSPTRT00000014113	661	840	+
ENSPTRG00000019087	ELMO1	Engulfment and cell motility 1; Uncharacterized protein [Source:UniProtKB/TrEMBL;Acc:H2QUF7]	ENSPTRT00000035273	3101	3401	+
ENSPTRG00000014639	IQSEC1	IQ motif and Sec7 domain 1 [Source:HGNC Symbol;Acc:HGNC:29112]	ENSPTRT00000027393	3421	3590	+
ENSPTRG00000014640	NUP210	nucleoporin 210kDa [Source:HGNC Symbol;Acc:HGNC:30052]	ENSPTRT00000027394	6681	6990	+
ENSPTRG00000009859	RALBP1	RalA binding protein 1; Uncharacterized protein [Source:UniProtKB/TrEMBL;Acc:H2R6U9]	ENSPTRT00000056728	501	670	+
ENSPTRG00000014154	SMARCB1	SWI/SNF related, matrix associated, actin dependent regulator of chromatin, subfamily b, member 1; Uncharacterized protein [Source:UniProtKB/TrEMBL;Acc:H2R0D2]	ENSPTRT00000049584	1201	1350	+
ENSPTRG00000007655	PDPK1	3-phosphoinositide dependent protein kinase 1 [Source:HGNC Symbol;Acc:HGNC:8816]	ENSPTRT00000014118	6071	6467	+
ENSPTRG00000009858	TWSG1	Twisted gastrulation homolog 1; Uncharacterized protein [Source:UniProtKB/TrEMBL;Acc:H2QE88]	ENSPTRT00000018110	561	961	+
ENSPTRG00000013908	ETS2	Uncharacterized protein [Source:UniProtKB/TrEMBL;Acc:H2R1W7]	ENSPTRT00000049677	1551	1760	+
ENSPTRG00000003367	USP47	ubiquitin specific peptidase 47 [Source:HGNC Symbol;Acc:HGNC:20076]	ENSPTRT00000066998	4681	5288	+
ENSPTRG00000009857	ANKRD12	ankyrin repeat domain 12 [Source:HGNC Symbol;Acc:HGNC:29135]	ENSPTRT00000018109	2141	2290	+
ENSPTRG00000016925	CWC27	CWC27 spliceosome-associated protein homolog; Uncharacterized protein [Source:UniProtKB/TrEMBL;Acc:H2QQZ4]	ENSPTRT00000031374	1501	1690	+
ENSPTRG00000013911	PSMG1	Proteasome (Prosome, macropain) assembly chaperone 1; Uncharacterized protein [Source:UniProtKB/TrEMBL;Acc:H2RAI5]	ENSPTRT00000025948	1	180	+
ENSPTRG00000004546	PARP11	Poly (ADP-ribose) polymerase family, member 11; Uncharacterized protein [Source:UniProtKB/TrEMBL;Acc:H2Q583]	ENSPTRT00000008417	811	1186	+
ENSPTRG00000004549	CCND2	Cyclin D2; Uncharacterized protein [Source:UniProtKB/TrEMBL;Acc:H2Q584]	ENSPTRT00000008421	6001	6150	+
ENSPTRG00000000247	RCC2	Uncharacterized protein [Source:UniProtKB/TrEMBL;Acc:H2R9F1]	ENSPTRT00000000510	2591	2690	+
ENSPTRG00000019093	EPDR1	Uncharacterized protein [Source:UniProtKB/TrEMBL;Acc:H2QUG1]	ENSPTRT00000035281	1141	1320	+
ENSPTRG00000014155	DERL3	derlin 3 [Source:HGNC Symbol;Acc:HGNC:14236]	ENSPTRT00000026446	621	770	+
ENSPTRG00000013912	BRWD1	bromodomain and WD repeat domain containing 1 [Source:HGNC Symbol;Acc:HGNC:12760]	ENSPTRT00000025950	6011	6709	+
ENSPTRG00000019094	STARD3NL	STARD3 N-terminal like; Uncharacterized protein [Source:UniProtKB/TrEMBL;Acc:H2QUG2]	ENSPTRT00000035282	231	507	+
ENSPTRG00000004553	C12orf4	chromosome 12 open reading frame 4 [Source:HGNC Symbol;Acc:HGNC:1184]	ENSPTRT00000008426	1771	1945	+
ENSPTRG00000021802	BCOR	BCL6 corepressor [Source:HGNC Symbol;Acc:HGNC:20893]	ENSPTRT00000040478	2191	2390	+
ENSPTRG00000016924	SREK1IP1	SREK1-interacting protein 1; Uncharacterized protein [Source:UniProtKB/TrEMBL;Acc:H2QQZ3]	ENSPTRT00000031373	271	681	+
ENSPTRG00000014647	CHCHD4	Coiled-coil-helix-coiled-coil-helix domain containing 4; Uncharacterized protein [Source:UniProtKB/TrEMBL;Acc:H2RBJ7]	ENSPTRT00000064236	431	630	+
ENSPTRG00000021803	ATP6AP2	ATPase, H+ transporting, lysosomal accessory protein 2 [Source:HGNC Symbol;Acc:HGNC:18305]	ENSPTRT00000040483	1521	1760	+
ENSPTRG00000014648	TMEM43	transmembrane protein 43 [Source:HGNC Symbol;Acc:HGNC:28472]	ENSPTRT00000027406	2491	2620	+
ENSPTRG00000021804	CXorf38	chromosome X open reading frame 38 [Source:HGNC Symbol;Acc:HGNC:28589]	ENSPTRT00000040487	471	653	+
ENSPTRG00000021805	MED14	mediator complex subunit 14 [Source:HGNC Symbol;Acc:HGNC:2370]	ENSPTRT00000040491	4371	4600	+
ENSPTRG00000014166	GSTT1	Glutathione S-transferase theta 1; Uncharacterized protein [Source:UniProtKB/TrEMBL;Acc:H2QLD4]	ENSPTRT00000026462	632	984	+
ENSPTRG00000007663		Uncharacterized protein [Source:UniProtKB/TrEMBL;Acc:H2QAE2]	ENSPTRT00000014134	300	413	+
ENSPTRG00000009849	LAMA1	Laminin, alpha 1; Uncharacterized protein [Source:UniProtKB/TrEMBL;Acc:H2QE84]	ENSPTRT00000018099	5081	5270	+
ENSPTRG00000014167	CABIN1	calcineurin binding protein 1 [Source:HGNC Symbol;Acc:HGNC:24187]	ENSPTRT00000026466	7121	7220	+
ENSPTRG00000014649	XPC	xeroderma pigmentosum, complementation group C [Source:HGNC Symbol;Acc:HGNC:12816]	ENSPTRT00000027408	1441	1730	+
ENSPTRG00000007671	FLYWCH1	FLYWCH-type zinc finger 1 [Source:HGNC Symbol;Acc:HGNC:25404]	ENSPTRT00000064224	931	1150	+
ENSPTRG00000031426	HMGN1	Uncharacterized protein [Source:UniProtKB/TrEMBL;Acc:H2RAI4]	ENSPTRT00000060568	31	390	+
ENSPTRG00000019104	VPS41	Uncharacterized protein; Vacuolar protein sorting 41 homolog [Source:UniProtKB/TrEMBL;Acc:H2QUG3]	ENSPTRT00000035298	1141	1330	+
ENSPTRG00000004557	NDUFA9	Pan troglodytes NADH dehydrogenase (ubiquinone) 1 alpha subcomplex, 9, 39kDa (NDUFA9), nuclear gene encoding mitochondrial protein, mRNA. [Source:RefSeq mRNA;Acc:NM_001079914]	ENSPTRT00000008433	1201	1300	+
ENSPTRG00000014650	LSM3	LSM3 homolog, U6 small nuclear RNA associated; Uncharacterized protein [Source:UniProtKB/TrEMBL;Acc:H2QM39]	ENSPTRT00000027409	551	670	+
ENSPTRG00000014651	SLC6A6	solute carrier family 6 (neurotransmitter transporter), member 6 [Source:HGNC Symbol;Acc:HGNC:11052]	ENSPTRT00000027410	2711	2830	+
ENSPTRG00000040645	UFM1	ubiquitin-fold modifier 1 [Source:HGNC Symbol;Acc:HGNC:20597]	ENSPTRT00000076272	271	430	+
ENSPTRG00000003376	ARNTL	Uncharacterized protein [Source:UniProtKB/TrEMBL;Acc:H2R2H7]	ENSPTRT00000046061	2041	2381	+
ENSPTRG00000014654	CCDC174	coiled-coil domain containing 174 [Source:HGNC Symbol;Acc:HGNC:28033]	ENSPTRT00000027416	1411	1510	+
ENSPTRG00000016910	ZSWIM6	zinc finger, SWIM-type containing 6 [Source:HGNC Symbol;Acc:HGNC:29316]	ENSPTRT00000031352	411	610	+
ENSPTRG00000007679	HCFC1R1	host cell factor C1 regulator 1 (XPO1 dependent) [Source:HGNC Symbol;Acc:HGNC:21198]	ENSPTRT00000043068	701	996	+
ENSPTRG00000016908	SMIM15	small integral membrane protein 15 [Source:HGNC Symbol;Acc:HGNC:33861]	ENSPTRT00000031350	841	1000	+
ENSPTRG00000005856	LRCH1	leucine-rich repeats and calponin homology (CH) domain containing 1 [Source:HGNC Symbol;Acc:HGNC:20309]	ENSPTRT00000010765	1471	1653	+
ENSPTRG00000019127	MRPS24	Mitochondrial ribosomal protein S24; Uncharacterized protein [Source:UniProtKB/TrEMBL;Acc:H2QUH6]	ENSPTRT00000035340	491	688	+
ENSPTRG00000019125	C7ORF44	uncharacterized protein LOC736211 [Source:RefSeq peptide;Acc:NP_001238769]	ENSPTRT00000035336	811	910	+
ENSPTRG00000005857	ESD	Esterase D; Uncharacterized protein [Source:UniProtKB/TrEMBL;Acc:H2Q7J5]	ENSPTRT00000010767	821	1024	+
ENSPTRG00000014172	SPECC1L	Pan troglodytes sperm antigen with calponin homology and coiled-coil domains 1-like (SPECC1L), mRNA. [Source:RefSeq mRNA;Acc:NM_001039963]	ENSPTRT00000067733	3791	4040	+
ENSPTRG00000019124	STK17A	Serine/threonine kinase 17a; Uncharacterized protein [Source:UniProtKB/TrEMBL;Acc:H2QUH4]	ENSPTRT00000035334	1161	1617	+
ENSPTRG00000003377	BTBD10	BTB (POZ) domain containing 10; Uncharacterized protein [Source:UniProtKB/TrEMBL;Acc:H2Q374]	ENSPTRT00000006390	1251	1500	+
ENSPTRG00000016902	DEPDC1B	DEP domain containing 1B; Uncharacterized protein [Source:UniProtKB/TrEMBL;Acc:H2QQY2]	ENSPTRT00000031344	1621	1770	+
ENSPTRG00000000257	UBR4	Ubiquitin protein ligase E3 component n-recognin 4; Uncharacterized protein [Source:UniProtKB/TrEMBL;Acc:H2PY68]	ENSPTRT00000000526	14261	14650	+
ENSPTRG00000024190	FAR1	Fatty acyl CoA reductase 1; Uncharacterized protein [Source:UniProtKB/TrEMBL;Acc:H2R2T3]	ENSPTRT00000046604	2681	2930	+
ENSPTRG00000014173	ADORA2A	adenosine A2a receptor [Source:HGNC Symbol;Acc:HGNC:263]	ENSPTRT00000026478	911	1010	+
ENSPTRG00000019121	MRPL32	mitochondrial ribosomal protein L32 [Source:HGNC Symbol;Acc:HGNC:14035]	ENSPTRT00000035329	381	598	+
ENSPTRG00000019120	PSMA2	Proteasome subunit alpha type [Source:UniProtKB/TrEMBL;Acc:H2R5C6]	ENSPTRT00000035328	611	769	+
ENSPTRG00000042329		Nudix (Nucleoside diphosphate linked moiety X)-type motif 15; Uncharacterized protein [Source:UniProtKB/TrEMBL;Acc:H2Q7J8]	ENSPTRT00000075860	421	740	+
ENSPTRG00000003383	RRAS2	related RAS viral (r-ras) oncogene homolog 2 [Source:HGNC Symbol;Acc:HGNC:17271]	ENSPTRT00000006397	1521	1710	+
ENSPTRG00000005861	MED4	mediator complex subunit 4 [Source:HGNC Symbol;Acc:HGNC:17903]	ENSPTRT00000010773	341	440	+
ENSPTRG00000014657	NR2C2	nuclear receptor subfamily 2, group C, member 2 [Source:HGNC Symbol;Acc:HGNC:7972]	ENSPTRT00000027420	1558	1936	+
ENSPTRG00000013926	MX2	Myxovirus (Influenza virus) resistance 2; Uncharacterized protein [Source:UniProtKB/TrEMBL;Acc:H2QL17]	ENSPTRT00000025973	2261	2370	+
ENSPTRG00000014658	MRPS25	Pan troglodytes mitochondrial ribosomal protein S25 (MRPS25), nuclear gene encoding mitochondrial protein, mRNA. [Source:RefSeq mRNA;Acc:NM_001251923]	ENSPTRT00000027421	520	820	+
ENSPTRG00000003384	COPB1	Coatomer subunit beta [Source:UniProtKB/TrEMBL;Acc:H2Q377]	ENSPTRT00000006398	2961	3124	+
ENSPTRG00000005863	ITM2B	Pan troglodytes integral membrane protein 2B (ITM2B), mRNA. [Source:RefSeq mRNA;Acc:NM_001098547]	ENSPTRT00000010775	130	420	+
ENSPTRG00000014659	ZFYVE20	Uncharacterized protein; Zinc finger, FYVE domain containing 20 [Source:UniProtKB/TrEMBL;Acc:H2QM46]	ENSPTRT00000027422	2191	2350	+
ENSPTRG00000014177	GGT2	gamma-glutamyltransferase 2 [Source:HGNC Symbol;Acc:HGNC:4251]	ENSPTRT00000046315	2133	2335	+
ENSPTRG00000013927	MX1	Myxovirus (Influenza virus) resistance 1, interferon-inducible protein p78; Uncharacterized protein [Source:UniProtKB/TrEMBL;Acc:H2QL18]	ENSPTRT00000025974	2521	2660	+
ENSPTRG00000014661	CAPN7	Calpain 7; Uncharacterized protein [Source:UniProtKB/TrEMBL;Acc:H2QM47]	ENSPTRT00000027425	2591	3060	+
ENSPTRG00000016896	PLK2	Polo-like kinase 2; Uncharacterized protein [Source:UniProtKB/TrEMBL;Acc:H2QQY0]	ENSPTRT00000031334	2274	2791	+
ENSPTRG00000014662	SH3BP5	SH3-domain binding protein 5 (BTK-associated); Uncharacterized protein [Source:UniProtKB/TrEMBL;Acc:H2QM48]	ENSPTRT00000027426	1451	1730	+
ENSPTRG00000005864	RB1	Retinoblastoma 1; Uncharacterized protein [Source:UniProtKB/TrEMBL;Acc:H2Q7K0]	ENSPTRT00000010776	2791	3010	+
ENSPTRG00000019113	MPLKIP	M-phase specific PLK1 interacting protein [Source:HGNC Symbol;Acc:HGNC:16002]	ENSPTRT00000035318	571	779	+
ENSPTRG00000019112	CDK13	cyclin-dependent kinase 13 [Source:HGNC Symbol;Acc:HGNC:1733]	ENSPTRT00000035312	4551	4952	+
ENSPTRG00000007692	ZNF263	Uncharacterized protein; Zinc finger protein 263 [Source:UniProtKB/TrEMBL;Acc:H2QAG0]	ENSPTRT00000014178	1351	1580	+
ENSPTRG00000030297	METTL6	Methyltransferase like 6; Phosphoglucomutase 2-like 1; Uncharacterized protein [Source:UniProtKB/TrEMBL;Acc:H2R8F1]	ENSPTRT00000058534	221	510	+
ENSPTRG00000014665	EAF1	ELL associated factor 1; Uncharacterized protein [Source:UniProtKB/TrEMBL;Acc:H2QM49]	ENSPTRT00000027430	3481	3724	+
ENSPTRG00000029823	CD27	CD27 molecule [Source:HGNC Symbol;Acc:HGNC:11922]	ENSPTRT00000057618	1021	1315	+
ENSPTRG00000011647			ENSPTRT00000021707	115	290	+
ENSPTRG00000021821	FUNDC1	FUN14 domain containing 1; Uncharacterized protein [Source:UniProtKB/TrEMBL;Acc:H2R4R7]	ENSPTRT00000040533	571	770	+
ENSPTRG00000016894	GPBP1	Uncharacterized protein [Source:UniProtKB/TrEMBL;Acc:H2QQX9]	ENSPTRT00000031331	2801	2940	+
ENSPTRG00000030295	COLQ	collagen-like tail subunit (single strand of homotrimer) of asymmetric acetylcholinesterase [Source:HGNC Symbol;Acc:HGNC:2226]	ENSPTRT00000065612	2001	2170	+
ENSPTRG00000021823	KDM6A	lysine (K)-specific demethylase 6A [Source:HGNC Symbol;Acc:HGNC:12637]	ENSPTRT00000040537	4671	4933	+
ENSPTRG00000019108	RALA	Uncharacterized protein; V-ral simian leukemia viral oncogene homolog A (Ras related) [Source:UniProtKB/TrEMBL;Acc:H2QUG6]	ENSPTRT00000035305	1101	1220	+
ENSPTRG00000007700	NAA60	N(alpha)-acetyltransferase 60, NatF catalytic subunit [Source:HGNC Symbol;Acc:HGNC:25875]	ENSPTRT00000014190	421	610	+
ENSPTRG00000019134	DBNL	Uncharacterized protein [Source:UniProtKB/TrEMBL;Acc:H2QUH8]	ENSPTRT00000035352	571	850	+
ENSPTRG00000013932	C2CD2	C2 calcium-dependent domain containing 2; Uncharacterized protein [Source:UniProtKB/TrEMBL;Acc:H2QL21]	ENSPTRT00000025986	2451	2750	+
ENSPTRG00000000261	EMC1	ER membrane protein complex subunit 1 [Source:HGNC Symbol;Acc:HGNC:28957]	ENSPTRT00000059560	2924	3230	+
ENSPTRG00000004576	NCAPD2	Condensin complex subunit 1 [Source:UniProtKB/TrEMBL;Acc:H2Q5A5]	ENSPTRT00000008465	3341	3490	+
ENSPTRG00000009833	LPIN2	Lipin 2; Uncharacterized protein [Source:UniProtKB/TrEMBL;Acc:H2QE76]	ENSPTRT00000018066	611	832	+
ENSPTRG00000000262	MRTO4	Uncharacterized protein; mRNA turnover 4 homolog [Source:UniProtKB/TrEMBL;Acc:H2PY69]	ENSPTRT00000000532	861	1160	+
ENSPTRG00000016891	MAP3K1	mitogen-activated protein kinase kinase kinase 1, E3 ubiquitin protein ligase [Source:HGNC Symbol;Acc:HGNC:6848]	ENSPTRT00000031328	5021	5336	+
ENSPTRG00000009832	EMILIN2	elastin microfibril interfacer 2 [Source:HGNC Symbol;Acc:HGNC:19881]	ENSPTRT00000018065	1141	1300	+
ENSPTRG00000023284	FNDC3A	Fibronectin type III domain containing 3A; Uncharacterized protein [Source:UniProtKB/TrEMBL;Acc:H2R0Q5]	ENSPTRT00000045230	4291	4390	+
ENSPTRG00000009831	SMCHD1	Uncharacterized protein [Source:UniProtKB/TrEMBL;Acc:H2QE74]	ENSPTRT00000074035	6087	6574	+
ENSPTRG00000019136	POLM	polymerase (DNA directed), mu [Source:HGNC Symbol;Acc:HGNC:9185]	ENSPTRT00000035355	1881	2080	+
ENSPTRG00000016887	IL6ST	Interleukin 6 signal transducer (Gp130, oncostatin M receptor); Uncharacterized protein [Source:UniProtKB/TrEMBL;Acc:H2R0A7]	ENSPTRT00000031324	2599	2833	+
ENSPTRG00000014667	HACL1	2-hydroxyacyl-CoA lyase 1; Uncharacterized protein [Source:UniProtKB/TrEMBL;Acc:H2QM50]	ENSPTRT00000027443	1731	1916	+
ENSPTRG00000007708	TRAP1	TNF receptor-associated protein 1; Uncharacterized protein [Source:UniProtKB/TrEMBL;Acc:H2QAH2]	ENSPTRT00000014210	1501	1690	+
ENSPTRG00000021832	SLC9A7	solute carrier family 9, subfamily A (NHE7, cation proton antiporter 7), member 7 [Source:HGNC Symbol;Acc:HGNC:17123]	ENSPTRT00000040556	1781	2110	+
ENSPTRG00000021834	JADE3	jade family PHD finger 3 [Source:HGNC Symbol;Acc:HGNC:22982]	ENSPTRT00000040559	401	560	+
ENSPTRG00000000268	CAPZB	capping protein (actin filament) muscle Z-line, beta [Source:HGNC Symbol;Acc:HGNC:1491]	ENSPTRT00000059552	931	1050	+
ENSPTRG00000021837	RBM10	RNA binding motif protein 10 [Source:HGNC Symbol;Acc:HGNC:9896]	ENSPTRT00000040567	1101	1240	+
ENSPTRG00000020996		Uncharacterized protein [Source:UniProtKB/TrEMBL;Acc:H2QXB6]	ENSPTRT00000038828	461	599	+
ENSPTRG00000014187	ADRBK2	adrenergic, beta, receptor kinase 2 [Source:HGNC Symbol;Acc:HGNC:290]	ENSPTRT00000026501	1881	2000	+
ENSPTRG00000020725	DOCK8	dedicator of cytokinesis 8 [Source:HGNC Symbol;Acc:HGNC:19191]	ENSPTRT00000038347	7041	7210	+
ENSPTRG00000021840	CDK16	Uncharacterized protein [Source:UniProtKB/TrEMBL;Acc:H2QYI7]	ENSPTRT00000040578	2581	2710	+
ENSPTRG00000019138	POLD2	Pan troglodytes polymerase (DNA directed), delta 2, accessory subunit (POLD2), mRNA. [Source:RefSeq mRNA;Acc:NM_001246468]	ENSPTRT00000035358	1491	1600	+
ENSPTRG00000003399	PIK3C2A	Phosphoinositide-3-kinase, class 2, alpha polypeptide; Uncharacterized protein [Source:UniProtKB/TrEMBL;Acc:H2Q383]	ENSPTRT00000006426	4971	5200	+
ENSPTRG00000014668	BTD	biotinidase [Source:HGNC Symbol;Acc:HGNC:1122]	ENSPTRT00000027444	801	940	+
ENSPTRG00000000269	MINOS1	mitochondrial inner membrane organizing system 1 [Source:HGNC Symbol;Acc:HGNC:32068]	ENSPTRT00000000542	377	480	+
ENSPTRG00000030292	ANKRD28	ankyrin repeat domain 28 [Source:HGNC Symbol;Acc:HGNC:29024]	ENSPTRT00000058515	3024	3754	+
ENSPTRG00000000272	TMCO4	Transmembrane and coiled-coil domains 4; Uncharacterized protein [Source:UniProtKB/TrEMBL;Acc:H2PY73]	ENSPTRT00000000548	2731	2943	+
ENSPTRG00000007710	CREBBP	Uncharacterized protein [Source:UniProtKB/TrEMBL;Acc:H2QAH3]	ENSPTRT00000014213	7141	7485	+
ENSPTRG00000005872	CAB39L	Calcium binding protein 39-like; Uncharacterized protein [Source:UniProtKB/TrEMBL;Acc:H2Q7K4]	ENSPTRT00000010791	521	620	+
ENSPTRG00000014194	HPS4	Hermansky-Pudlak syndrome 4; Uncharacterized protein [Source:UniProtKB/TrEMBL;Acc:H2QLE6]	ENSPTRT00000026521	3261	3500	+
ENSPTRG00000021846	ARAF	v-raf murine sarcoma 3611 viral oncogene homolog [Source:HGNC Symbol;Acc:HGNC:646]	ENSPTRT00000040588	291	510	+
ENSPTRG00000003400	NUCB2	Nucleobindin 2; Uncharacterized protein [Source:UniProtKB/TrEMBL;Acc:H2Q384]	ENSPTRT00000006427	731	830	+
ENSPTRG00000013945	SLC37A1	Solute carrier family 37 (Glycerol-3-phosphate transporter), member 1; Uncharacterized protein [Source:UniProtKB/TrEMBL;Acc:H2QL31]	ENSPTRT00000026010	2811	3030	+
ENSPTRG00000020092	KCTD9	Potassium channel tetramerisation domain containing 9; Uncharacterized protein [Source:UniProtKB/TrEMBL;Acc:H2QVX3]	ENSPTRT00000037223	1471	1640	+
ENSPTRG00000020094	CDCA2	Cell division cycle associated 2; Uncharacterized protein [Source:UniProtKB/TrEMBL;Acc:H2QVX4]	ENSPTRT00000037225	3471	3590	+
ENSPTRG00000016880	PPAP2A	phosphatidic acid phosphatase type 2A [Source:HGNC Symbol;Acc:HGNC:9228]	ENSPTRT00000074733	865	1070	+
ENSPTRG00000019141	YKT6	Uncharacterized protein; YKT6 v-SNARE homolog [Source:UniProtKB/TrEMBL;Acc:H2QUI3]	ENSPTRT00000035364	1581	1820	+
ENSPTRG00000005875	RCBTB1	Regulator of chromosome condensation (RCC1) and BTB (POZ) domain containing protein 1; Uncharacterized protein [Source:UniProtKB/TrEMBL;Acc:H2Q7K5]	ENSPTRT00000010797	1451	1590	+
ENSPTRG00000016878	SKIV2L2	Superkiller viralicidic activity 2-like 2; Uncharacterized protein [Source:UniProtKB/TrEMBL;Acc:H2QQX1]	ENSPTRT00000031303	1981	2130	+
ENSPTRG00000014196	TFIP11	Pan troglodytes tuftelin interacting protein 11 (TFIP11), mRNA. [Source:RefSeq mRNA;Acc:NM_001080152]	ENSPTRT00000026524	2441	2827	+
ENSPTRG00000019144	NUDCD3	NudC domain containing 3; Uncharacterized protein [Source:UniProtKB/TrEMBL;Acc:H2QUI4]	ENSPTRT00000035380	2231	2550	+
ENSPTRG00000005878	KPNA3	Importin subunit alpha [Source:UniProtKB/TrEMBL;Acc:H2Q7K7]	ENSPTRT00000010802	2400	2522	+
ENSPTRG00000000288	MUL1	Mitochondrial E3 ubiquitin protein ligase 1; Uncharacterized protein [Source:UniProtKB/TrEMBL;Acc:H2PY85]	ENSPTRT00000000569	1511	1750	+
ENSPTRG00000023259		Uncharacterized protein [Source:UniProtKB/TrEMBL;Acc:H2R2A1]	ENSPTRT00000048704	261	375	+
ENSPTRG00000014672	OXNAD1	Oxidoreductase NAD-binding domain containing 1; Uncharacterized protein [Source:UniProtKB/TrEMBL;Acc:H2QM54]	ENSPTRT00000027450	1204	1492	+
ENSPTRG00000000291	PINK1	PTEN induced putative kinase 1; Uncharacterized protein [Source:UniProtKB/TrEMBL;Acc:H2PY88]	ENSPTRT00000000572	1781	2267	+
ENSPTRG00000014197	TPST2	Tyrosylprotein sulfotransferase 2; Uncharacterized protein [Source:UniProtKB/TrEMBL;Acc:H2QLE8]	ENSPTRT00000026526	1471	1650	+
ENSPTRG00000014673	RFTN1	Raftlin, lipid raft linker 1; Uncharacterized protein [Source:UniProtKB/TrEMBL;Acc:H2QM55]	ENSPTRT00000027452	2471	2620	+
ENSPTRG00000042450	PPP2R2A	protein phosphatase 2, regulatory subunit B, alpha [Source:HGNC Symbol;Acc:HGNC:9304]	ENSPTRT00000037228	1601	1770	+
ENSPTRG00000033766	DDOST	Dolichyl-diphosphooligosaccharide--protein glycosyltransferase; Uncharacterized protein [Source:UniProtKB/TrEMBL;Acc:H2RDP4]	ENSPTRT00000060703	1811	1940	+
ENSPTRG00000007718	DNAJA3	DnaJ (Hsp40) homolog, subfamily A, member 3; Uncharacterized protein [Source:UniProtKB/TrEMBL;Acc:H2R2N0]	ENSPTRT00000045206	1211	1655	+
ENSPTRG00000020097	BNIP3L	BCL2/adenovirus E1B 19kDa interacting protein 3-like; Uncharacterized protein [Source:UniProtKB/TrEMBL;Acc:H2QVX5]	ENSPTRT00000037229	1216	1440	+
ENSPTRG00000016875	DHX29	DEAH (Asp-Glu-Ala-His) box polypeptide 29; Uncharacterized protein [Source:UniProtKB/TrEMBL;Acc:H2QQX0]	ENSPTRT00000031298	1551	1970	+
ENSPTRG00000019147	DDX56	DEAD (Asp-Glu-Ala-Asp) box polypeptide 56; Uncharacterized protein [Source:UniProtKB/TrEMBL;Acc:H2QUI5]	ENSPTRT00000035384	2191	2480	+
ENSPTRG00000005886	RNASEH2B	ribonuclease H2, subunit B [Source:HGNC Symbol;Acc:HGNC:25671]	ENSPTRT00000049457	1231	1366	+
ENSPTRG00000021870	HDAC6	histone deacetylase 6 [Source:HGNC Symbol;Acc:HGNC:14064]	ENSPTRT00000040638	56	394	+
ENSPTRG00000004579	NOP2	NOP2 nucleolar protein homolog; Uncharacterized protein [Source:UniProtKB/TrEMBL;Acc:H2R7K6]	ENSPTRT00000044817	2201	2440	+
ENSPTRG00000014202	PITPNB	phosphatidylinositol transfer protein, beta [Source:HGNC Symbol;Acc:HGNC:9002]	ENSPTRT00000026534	1191	1360	+
ENSPTRG00000009816	THOC1	Uncharacterized protein [Source:UniProtKB/TrEMBL;Acc:H2QE64]	ENSPTRT00000018033	1891	2070	+
ENSPTRG00000007719	NMRAL1	Uncharacterized protein [Source:UniProtKB/TrEMBL;Acc:H2QAH8]	ENSPTRT00000014229	731	830	+
ENSPTRG00000021872	TIMM17B	translocase of inner mitochondrial membrane 17 homolog B (yeast) [Source:HGNC Symbol;Acc:HGNC:17310]	ENSPTRT00000073097	431	560	+
ENSPTRG00000021873	PQBP1	Polyglutamine binding protein 1; Uncharacterized protein [Source:UniProtKB/TrEMBL;Acc:H2QYK3]	ENSPTRT00000040643	571	800	+
ENSPTRG00000020735	KIAA0020	KIAA0020; Uncharacterized protein [Source:UniProtKB/TrEMBL;Acc:H2QWZ0]	ENSPTRT00000038373	1991	2110	+
ENSPTRG00000014676	TBC1D5	TBC1 domain family, member 5; Uncharacterized protein [Source:UniProtKB/TrEMBL;Acc:H2QM58]	ENSPTRT00000027456	5051	5188	+
ENSPTRG00000003408	SERGEF	secretion regulating guanine nucleotide exchange factor [Source:HGNC Symbol;Acc:HGNC:17499]	ENSPTRT00000006444	1313	1560	+
ENSPTRG00000023084	C16H16ORF5	Pan troglodytes chromosome 16 open reading frame 5 (C16H16orf5), mRNA. [Source:RefSeq mRNA;Acc:NM_001243097]	ENSPTRT00000048324	2391	2580	+
ENSPTRG00000005890	INTS6	integrator complex subunit 6 [Source:HGNC Symbol;Acc:HGNC:14879]	ENSPTRT00000010820	2671	2770	+
ENSPTRG00000019148	TMED4	Transmembrane emp24 protein transport domain containing 4; Uncharacterized protein [Source:UniProtKB/TrEMBL;Acc:H2QUI6]	ENSPTRT00000035385	1821	2010	+
ENSPTRG00000004580	CHD4	Uncharacterized protein [Source:UniProtKB/TrEMBL;Acc:H2QZP6]	ENSPTRT00000042594	3071	3588	+
ENSPTRG00000021875	PIM2	pim-2 oncogene [Source:HGNC Symbol;Acc:HGNC:8987]	ENSPTRT00000040645	2071	2180	+
ENSPTRG00000014677	SATB1	SATB homeobox 1; Uncharacterized protein [Source:UniProtKB/TrEMBL;Acc:H2QM59]	ENSPTRT00000027458	4471	4570	+
ENSPTRG00000003410	SAAL1	Serum amyloid A-like 1; Uncharacterized protein [Source:UniProtKB/TrEMBL;Acc:H2R5J4]	ENSPTRT00000006447	1091	1270	+
ENSPTRG00000007722	UBALD1	UBA-like domain containing 1 [Source:HGNC Symbol;Acc:HGNC:29576]	ENSPTRT00000014232	551	820	+
ENSPTRG00000009815	USP14	Pan troglodytes ubiquitin specific peptidase 14 (tRNA-guanine transglycosylase) (USP14), mRNA. [Source:RefSeq mRNA;Acc:NM_001045496]	ENSPTRT00000009757	2302	2455	+
ENSPTRG00000021876	OTUD5	OTU deubiquitinase 5 [Source:HGNC Symbol;Acc:HGNC:25402]	ENSPTRT00000040646	1061	1188	+
ENSPTRG00000004582	ACRBP	Pan troglodytes acrosin binding protein (ACRBP), mRNA. [Source:RefSeq mRNA;Acc:NM_001246605]	ENSPTRT00000008476	586	813	+
ENSPTRG00000019149	OGDH	Uncharacterized protein [Source:UniProtKB/TrEMBL;Acc:H2QUI7]	ENSPTRT00000035386	99	480	+
ENSPTRG00000020103	TRIM35	Tripartite motif containing 35; Uncharacterized protein [Source:UniProtKB/TrEMBL;Acc:H2QVX7]	ENSPTRT00000037239	1151	1380	+
ENSPTRG00000000296	HP1BP3	Heterochromatin protein 1, binding protein 3; Uncharacterized protein [Source:UniProtKB/TrEMBL;Acc:H2R1V4]	ENSPTRT00000044694	1831	1990	+
ENSPTRG00000005892	WDFY2	Uncharacterized protein; WD repeat and FYVE domain containing 2 [Source:UniProtKB/TrEMBL;Acc:H2Q7L3]	ENSPTRT00000010822	1621	1770	+
ENSPTRG00000020739	SLC1A1	Solute carrier family 1 (Neuronal/epithelial high affinity glutamate transporter, system Xag), member 1; Uncharacterized protein [Source:UniProtKB/TrEMBL;Acc:H2R6U6]	ENSPTRT00000056719	1781	1980	+
ENSPTRG00000020104	PTK2B	PTK2B protein tyrosine kinase 2 beta; Uncharacterized protein [Source:UniProtKB/TrEMBL;Acc:H2QVX8]	ENSPTRT00000037241	3341	3620	+
ENSPTRG00000004583	ING4	Inhibitor of growth family, member 4; Uncharacterized protein [Source:UniProtKB/TrEMBL;Acc:H2Q5A9]	ENSPTRT00000008479	321	550	+
ENSPTRG00000021877	KCND1	potassium voltage-gated channel, Shal-related subfamily, member 1 [Source:HGNC Symbol;Acc:HGNC:6237]	ENSPTRT00000040648	121	540	+
ENSPTRG00000000297	EIF4G3	Eukaryotic translation initiation factor 4 gamma, 3; Uncharacterized protein [Source:UniProtKB/TrEMBL;Acc:H2PY91]	ENSPTRT00000000582	5426	5610	+
ENSPTRG00000007724	NUDT16L1	Nudix (Nucleoside diphosphate linked moiety X)-type motif 16-like 1; Uncharacterized protein [Source:UniProtKB/TrEMBL;Acc:H2QAI1]	ENSPTRT00000014236	1201	1302	+
ENSPTRG00000009904	ROCK1	Rho-associated protein kinase 1; Rho-associated, coiled-coil containing protein kinase 1 [Source:UniProtKB/TrEMBL;Acc:H2QEB3]	ENSPTRT00000018191	5411	5650	+
ENSPTRG00000016868	SNX18	Sorting nexin 18; Uncharacterized protein [Source:UniProtKB/TrEMBL;Acc:H2QQW2]	ENSPTRT00000031287	1630	2232	+
ENSPTRG00000021882		Uncharacterized protein [Source:UniProtKB/TrEMBL;Acc:H2QYL0]	ENSPTRT00000040655	23	180	+
ENSPTRG00000003419	HPS5	Hermansky-Pudlak syndrome 5; Uncharacterized protein [Source:UniProtKB/TrEMBL;Acc:H2R5J2]	ENSPTRT00000006457	4051	4220	+
ENSPTRG00000004584	ZNF384	Uncharacterized protein; Zinc finger protein 384 [Source:UniProtKB/TrEMBL;Acc:H2R2P2]	ENSPTRT00000043105	2723	2879	+
ENSPTRG00000007727	ZNF500	Pan troglodytes zinc finger protein 500 (ZNF500), mRNA. [Source:RefSeq mRNA;Acc:NM_001071785]	ENSPTRT00000014240	1521	1758	+
ENSPTRG00000020742	AK3	adenylate kinase 3 [Source:HGNC Symbol;Acc:HGNC:17376]	ENSPTRT00000038387	901	1030	+
ENSPTRG00000021885	PLP2	proteolipid protein 2 (colonic epithelium-enriched) [Source:HGNC Symbol;Acc:HGNC:9087]	ENSPTRT00000040662	611	760	+
ENSPTRG00000020743	RCL1	RNA terminal phosphate cyclase-like 1 [Source:HGNC Symbol;Acc:HGNC:17687]	ENSPTRT00000038388	1661	2045	+
ENSPTRG00000014209	CCDC117	Coiled-coil domain containing 117; Uncharacterized protein [Source:UniProtKB/TrEMBL;Acc:H2QLF3]	ENSPTRT00000026544	731	1160	+
ENSPTRG00000020744	JAK2	Tyrosine-protein kinase [Source:UniProtKB/TrEMBL;Acc:H2QWZ4]	ENSPTRT00000038390	4779	5037	+
ENSPTRG00000003420	GTF2H1	General transcription factor IIH, polypeptide 1, 62kDa; Uncharacterized protein [Source:UniProtKB/TrEMBL;Acc:H2Q394]	ENSPTRT00000006459	2141	2361	+
ENSPTRG00000000298	ECE1	Endothelin converting enzyme 1; Uncharacterized protein [Source:UniProtKB/TrEMBL;Acc:H2R1S0]	ENSPTRT00000046600	2211	2726	+
ENSPTRG00000019150	ZMIZ2	Uncharacterized protein; Zinc finger, MIZ-type containing 2 [Source:UniProtKB/TrEMBL;Acc:H2QUI8]	ENSPTRT00000035387	3141	3335	+
ENSPTRG00000004587	MLF2	Myeloid leukemia factor 2; Uncharacterized protein [Source:UniProtKB/TrEMBL;Acc:H2Q5B2]	ENSPTRT00000008486	1391	1530	+
ENSPTRG00000007730	GLYR1	glyoxylate reductase 1 homolog (Arabidopsis) [Source:HGNC Symbol;Acc:HGNC:24434]	ENSPTRT00000014245	1441	1820	+
ENSPTRG00000009908	ESCO1	Establishment of cohesion 1 homolog 1; Uncharacterized protein [Source:UniProtKB/TrEMBL;Acc:H2QEB6]	ENSPTRT00000018196	3488	3670	+
ENSPTRG00000013948	WDR4	Uncharacterized protein; WD repeat domain 4 [Source:UniProtKB/TrEMBL;Acc:H2QL33]	ENSPTRT00000026020	1836	2129	+
ENSPTRG00000014693	UBE2E1	Ubiquitin-conjugating enzyme E2E 1; Uncharacterized protein [Source:UniProtKB/TrEMBL;Acc:H2QM68]	ENSPTRT00000027484	1182	1360	+
ENSPTRG00000007731	UBN1	Ubinuclein 1; Uncharacterized protein [Source:UniProtKB/TrEMBL;Acc:H2QAI8]	ENSPTRT00000014246	4141	4420	+
ENSPTRG00000009910	ABHD3	Abhydrolase domain containing 3; Uncharacterized protein [Source:UniProtKB/TrEMBL;Acc:H2QEB8]	ENSPTRT00000018198	1371	1520	+
ENSPTRG00000013949	NDUFV3	Pan troglodytes NADH dehydrogenase (ubiquinone) flavoprotein 3, 10kDa (NDUFV3), nuclear gene encoding mitochondrial protein, mRNA. [Source:RefSeq mRNA;Acc:NM_001071813]	ENSPTRT00000026023	181	477	+
ENSPTRG00000014695	RPL15	ribosomal protein L15 [Source:HGNC Symbol;Acc:HGNC:10306]	ENSPTRT00000027487	771	930	+
ENSPTRG00000009912	MIB1	mindbomb E3 ubiquitin protein ligase 1 [Source:HGNC Symbol;Acc:HGNC:21086]	ENSPTRT00000018200	6374	6541	+
ENSPTRG00000013950	PKNOX1	PBX/knotted 1 homeobox 1; Uncharacterized protein [Source:UniProtKB/TrEMBL;Acc:H2RAH8]	ENSPTRT00000060550	1411	1570	+
ENSPTRG00000023064	PPIA	Peptidyl-prolyl cis-trans isomerase A Peptidyl-prolyl cis-trans isomerase A, N-terminally processed [Source:UniProtKB/Swiss-Prot;Acc:Q0ZQL1]	ENSPTRT00000042850	441	746	+
ENSPTRG00000003421	LDHA	Pan troglodytes lactate dehydrogenase A (LDHA), mRNA. [Source:RefSeq mRNA;Acc:NM_001034096]	ENSPTRT00000006460	1698	1842	+
ENSPTRG00000014696	NR1D2	Nuclear receptor subfamily 1, group D, member 2; Uncharacterized protein [Source:UniProtKB/TrEMBL;Acc:H2QM71]	ENSPTRT00000027488	1851	2300	+
ENSPTRG00000024384	LAG3	lymphocyte-activation gene 3 [Source:HGNC Symbol;Acc:HGNC:6476]	ENSPTRT00000049525	1831	1990	+
ENSPTRG00000019153	H2AFV	H2A histone family, member V [Source:HGNC Symbol;Acc:HGNC:20664]	ENSPTRT00000035397	56	190	+
ENSPTRG00000005902	VPS36	Uncharacterized protein; Vacuolar protein sorting 36 homolog [Source:UniProtKB/TrEMBL;Acc:H2Q7L7]	ENSPTRT00000010840	381	690	+
ENSPTRG00000034409	PELO	Pelota homolog; Uncharacterized protein [Source:UniProtKB/TrEMBL;Acc:H2QQV5]	ENSPTRT00000031276	1361	1650	+
ENSPTRG00000020755	CD274	CD274 molecule; Uncharacterized protein [Source:UniProtKB/TrEMBL;Acc:H2QWZ8]	ENSPTRT00000038406	1303	1538	+
ENSPTRG00000016857	PARP8	poly (ADP-ribose) polymerase family, member 8 [Source:HGNC Symbol;Acc:HGNC:26124]	ENSPTRT00000031272	2551	2730	+
ENSPTRG00000019155	MYO1G	myosin IG [Source:HGNC Symbol;Acc:HGNC:13880]	ENSPTRT00000035404	3121	3270	+
ENSPTRG00000020757	KIAA1432	Uncharacterized protein [Source:UniProtKB/TrEMBL;Acc:H2R6T8]	ENSPTRT00000038413	3773	4120	+
ENSPTRG00000009916	CABLES1	Cdk5 and Abl enzyme substrate 1 [Source:HGNC Symbol;Acc:HGNC:25097]	ENSPTRT00000018207	1861	2290	+
ENSPTRG00000000304	USP48	Ubiquitin specific peptidase 48; Uncharacterized protein [Source:UniProtKB/TrEMBL;Acc:H2PY94]	ENSPTRT00000000599	3381	3575	+
ENSPTRG00000014699	TOP2B	topoisomerase (DNA) II beta 180kDa [Source:HGNC Symbol;Acc:HGNC:11990]	ENSPTRT00000027495	4441	4824	+
ENSPTRG00000016854	MRPS30	Mitochondrial ribosomal protein S30; Uncharacterized protein [Source:UniProtKB/TrEMBL;Acc:H2QQU9]	ENSPTRT00000031269	1281	1442	+
ENSPTRG00000005906	SUGT1	SGT1, suppressor of G2 allele of SKP1; Uncharacterized protein [Source:UniProtKB/TrEMBL;Acc:H2Q7L9]	ENSPTRT00000010846	881	1050	+
ENSPTRG00000013952	U2AF1	U2 small nuclear RNA auxiliary factor 1; Uncharacterized protein [Source:UniProtKB/TrEMBL;Acc:H2Q4C7]	ENSPTRT00000007520	831	940	+
ENSPTRG00000019156	CCM2	cerebral cavernous malformation 2 [Source:HGNC Symbol;Acc:HGNC:21708]	ENSPTRT00000035405	1450	1757	+
ENSPTRG00000004594	USP5	ubiquitin specific peptidase 5 (isopeptidase T) [Source:HGNC Symbol;Acc:HGNC:12628]	ENSPTRT00000008497	2461	2790	+
ENSPTRG00000016851	NNT	Nicotinamide nucleotide transhydrogenase; Uncharacterized protein [Source:UniProtKB/TrEMBL;Acc:H2QQU7]	ENSPTRT00000031266	3861	4060	+
ENSPTRG00000004595	TPI1	Pan troglodytes triosephosphate isomerase 1 (TPI1), mRNA. [Source:RefSeq mRNA;Acc:NM_001071782]	ENSPTRT00000065677	731	870	+
ENSPTRG00000009918	RIOK3	RIO kinase 3; Uncharacterized protein [Source:UniProtKB/TrEMBL;Acc:H2QEC3]	ENSPTRT00000018210	2121	2440	+
ENSPTRG00000013954	SIK1	Salt-inducible kinase 1; Uncharacterized protein [Source:UniProtKB/TrEMBL;Acc:H2QL37]	ENSPTRT00000026037	2261	2587	+
ENSPTRG00000009919	C18orf8	chromosome 18 open reading frame 8 [Source:HGNC Symbol;Acc:HGNC:24326]	ENSPTRT00000018212	1381	1600	+
ENSPTRG00000020109	CCDC25	Coiled-coil domain containing 25; Uncharacterized protein [Source:UniProtKB/TrEMBL;Acc:H2QZF2]	ENSPTRT00000051060	3421	3623	+
ENSPTRG00000014221	AP1B1	adaptor-related protein complex 1, beta 1 subunit [Source:HGNC Symbol;Acc:HGNC:554]	ENSPTRT00000026570	1	120	+
ENSPTRG00000019159	TBRG4	transforming growth factor beta regulator 4 [Source:HGNC Symbol;Acc:HGNC:17443]	ENSPTRT00000035410	1931	2189	+
ENSPTRG00000013958	RRP1B	Ribosomal RNA processing 1 homolog B; Uncharacterized protein [Source:UniProtKB/TrEMBL;Acc:H2QL39]	ENSPTRT00000026042	4931	5040	+
ENSPTRG00000014225	THOC5	THO complex 5; Uncharacterized protein [Source:UniProtKB/TrEMBL;Acc:H2R061]	ENSPTRT00000047002	2241	2515	+
ENSPTRG00000004597	LRRC23	Leucine rich repeat containing 23; Uncharacterized protein [Source:UniProtKB/TrEMBL;Acc:H2Q5B7]	ENSPTRT00000008502	1459	1613	+
ENSPTRG00000014700	NGLY1	N-glycanase 1; Uncharacterized protein [Source:UniProtKB/TrEMBL;Acc:H2QM74]	ENSPTRT00000027498	411	630	+
ENSPTRG00000020765	UHRF2	Ubiquitin-like with PHD and ring finger domains 2; Uncharacterized protein [Source:UniProtKB/TrEMBL;Acc:H2QX03]	ENSPTRT00000038425	2681	2930	+
ENSPTRG00000040962	PDXK	Pyridoxal (Pyridoxine, vitamin B6) kinase; Uncharacterized protein [Source:UniProtKB/TrEMBL;Acc:H2RGH3]	ENSPTRT00000072868	1051	1198	+
ENSPTRG00000004600	C12orf57	chromosome 12 open reading frame 57 [Source:HGNC Symbol;Acc:HGNC:29521]	ENSPTRT00000008509	431	547	+
ENSPTRG00000003424	TSG101	Tumor susceptibility gene 101; Uncharacterized protein [Source:UniProtKB/TrEMBL;Acc:H2Q397]	ENSPTRT00000006464	871	1100	+
ENSPTRG00000004601	PTPN6	protein tyrosine phosphatase, non-receptor type 6 [Source:HGNC Symbol;Acc:HGNC:9658]	ENSPTRT00000008510	2011	2110	+
ENSPTRG00000016845	HMGCS1	3-hydroxy-3-methylglutaryl-CoA synthase 1 (Soluble); 3-hydroxy-3-methylglutaryl-Coenzyme A synthase 1 (Soluble); Uncharacterized protein [Source:UniProtKB/TrEMBL;Acc:H2QQU5]	ENSPTRT00000031255	1621	1742	+
ENSPTRG00000009920	NPC1	Niemann-Pick disease, type C1 [Source:HGNC Symbol;Acc:HGNC:7897]	ENSPTRT00000018213	3991	4556	+
ENSPTRG00000014701	OXSM	3-oxoacyl-[acyl-carrier-protein] synthase, mitochondrial [Source:UniProtKB/TrEMBL;Acc:H2QM75]	ENSPTRT00000027499	1181	1491	+
ENSPTRG00000000315	ZBTB40	Uncharacterized protein; Zinc finger and BTB domain containing 40 [Source:UniProtKB/TrEMBL;Acc:H2PYA0]	ENSPTRT00000000625	8161	8380	+
ENSPTRG00000020113	SCARA5	scavenger receptor class A, member 5 (putative) [Source:HGNC Symbol;Acc:HGNC:28701]	ENSPTRT00000037256	1291	1400	+
ENSPTRG00000013962	RRP1	ribosomal RNA processing 1 [Source:HGNC Symbol;Acc:HGNC:18785]	ENSPTRT00000026051	1311	1747	+
ENSPTRG00000002229	ZMYND11	Uncharacterized protein [Source:UniProtKB/TrEMBL;Acc:H2Q1I7]	ENSPTRT00000004081	1791	2010	+
ENSPTRG00000020115	ELP3	Elongation protein 3 homolog; Uncharacterized protein [Source:UniProtKB/TrEMBL;Acc:H2QVY7]	ENSPTRT00000037259	1621	2430	+
ENSPTRG00000023289		Family with sequence similarity 156, member A; Uncharacterized protein [Source:UniProtKB/TrEMBL;Acc:H2R4Q7]	ENSPTRT00000047185	2908	3291	+
ENSPTRG00000008508	FAM57A	family with sequence similarity 57, member A [Source:HGNC Symbol;Acc:HGNC:29646]	ENSPTRT00000015697	701	864	+
ENSPTRG00000021925	KDM5C	lysine (K)-specific demethylase 5C [Source:HGNC Symbol;Acc:HGNC:11114]	ENSPTRT00000042028	551	690	+
ENSPTRG00000034071			ENSPTRT00000046688	1231	1402	+
ENSPTRG00000008511	GLOD4	glyoxalase domain containing 4 [Source:HGNC Symbol;Acc:HGNC:14111]	ENSPTRT00000015702	1761	1920	+
ENSPTRG00000016831	C5orf51	chromosome 5 open reading frame 51 [Source:HGNC Symbol;Acc:HGNC:27750]	ENSPTRT00000031239	666	853	+
ENSPTRG00000016829	OXCT1	Succinyl-CoA:3-ketoacid-coenzyme A transferase [Source:UniProtKB/TrEMBL;Acc:H2QQT8]	ENSPTRT00000031236	2671	2790	+
ENSPTRG00000007749	CARHSP1	Calcium regulated heat stable protein 1, 24kDa; Uncharacterized protein [Source:UniProtKB/TrEMBL;Acc:H2QAJ7]	ENSPTRT00000014284	440	620	+
ENSPTRG00000008512	RNMTL1	Uncharacterized protein [Source:UniProtKB/TrEMBL;Acc:H2QBT3]	ENSPTRT00000015703	1221	1540	+
ENSPTRG00000013964	AGPAT3	1-acylglycerol-3-phosphate O-acyltransferase 3; Uncharacterized protein [Source:UniProtKB/TrEMBL;Acc:H2RAH6]	ENSPTRT00000026055	1231	1639	+
ENSPTRG00000007750	USP7	ubiquitin specific peptidase 7 (herpes virus-associated) [Source:HGNC Symbol;Acc:HGNC:12630]	ENSPTRT00000060397	3071	3600	+
ENSPTRG00000003426	SPTY2D1	SPT2, Suppressor of Ty, domain containing 1 (S. cerevisiae) [Source:HGNC Symbol;Acc:HGNC:26818]	ENSPTRT00000006468	1008	1250	+
ENSPTRG00000020119	ZNF395	Uncharacterized protein; Zinc finger protein 395 [Source:UniProtKB/TrEMBL;Acc:H2QVY9]	ENSPTRT00000037263	1990	2160	+
ENSPTRG00000008513	NXN	Uncharacterized protein [Source:UniProtKB/TrEMBL;Acc:H2QBT4]	ENSPTRT00000015704	1151	1450	+
ENSPTRG00000013968	TRAPPC10	Trafficking protein particle complex 10; Uncharacterized protein [Source:UniProtKB/TrEMBL;Acc:H2QL40]	ENSPTRT00000026061	3831	4170	+
ENSPTRG00000021929	HSD17B10	Hydroxysteroid (17-beta) dehydrogenase 10; Uncharacterized protein [Source:UniProtKB/TrEMBL;Acc:H2QYN3]	ENSPTRT00000040756	12	130	+
ENSPTRG00000000321	KDM1A	lysine (K)-specific demethylase 1A [Source:HGNC Symbol;Acc:HGNC:29079]	ENSPTRT00000065879	2407	2556	+
ENSPTRG00000020124	EXTL3	Exostoses (Multiple)-like 3; Uncharacterized protein [Source:UniProtKB/TrEMBL;Acc:H2QVZ1]	ENSPTRT00000037273	3511	3698	+
ENSPTRG00000002235	LARP4B	La ribonucleoprotein domain family, member 4B; Uncharacterized protein [Source:UniProtKB/TrEMBL;Acc:H2Q1I9]	ENSPTRT00000004091	5361	5600	+
ENSPTRG00000004607	C1RL	Complement component 1, r subcomponent-like; Uncharacterized protein [Source:UniProtKB/TrEMBL;Acc:H2Q5C0]	ENSPTRT00000008517	1211	1621	+
ENSPTRG00000021930	HUWE1	HECT, UBA and WWE domain containing 1, E3 ubiquitin protein ligase [Source:HGNC Symbol;Acc:HGNC:30892]	ENSPTRT00000049267	8454	8959	+
ENSPTRG00000039806			ENSPTRT00000073497	1011	1202	+
ENSPTRG00000004609	CLSTN3	calsyntenin 3 [Source:HGNC Symbol;Acc:HGNC:18371]	ENSPTRT00000008520	2561	2837	+
ENSPTRG00000002236	GTPBP4	GTP binding protein 4 [Source:HGNC Symbol;Acc:HGNC:21535]	ENSPTRT00000004093	1591	1760	+
ENSPTRG00000019166	IGFBP3	insulin-like growth factor binding protein 3 [Source:HGNC Symbol;Acc:HGNC:5472]	ENSPTRT00000035422	1171	1320	+
ENSPTRG00000000322	LUZP1	Leucine zipper protein 1; Uncharacterized protein [Source:UniProtKB/TrEMBL;Acc:H2RCT1]	ENSPTRT00000066222	731	880	+
ENSPTRG00000013969			ENSPTRT00000026063	3021	3150	+
ENSPTRG00000004610	PEX5	Uncharacterized protein [Source:UniProtKB/TrEMBL;Acc:H2Q5C3]	ENSPTRT00000008524	1821	1987	+
ENSPTRG00000008521	YWHAE	Pan troglodytes tyrosine 3-monooxygenase/tryptophan 5-monooxygenase activation protein, epsilon polypeptide (YWHAE), mRNA. [Source:RefSeq mRNA;Acc:NM_001246368]	ENSPTRT00000015715	1711	1820	+
ENSPTRG00000000324	HNRNPR	Heterogeneous nuclear ribonucleoprotein R; Uncharacterized protein [Source:UniProtKB/TrEMBL;Acc:H2PYA4]	ENSPTRT00000000644	1901	2191	+
ENSPTRG00000021932	PHF8	PHD finger protein 8 [Source:HGNC Symbol;Acc:HGNC:20672]	ENSPTRT00000043011	1731	2438	+
ENSPTRG00000014230		Uncharacterized protein [Source:UniProtKB/TrEMBL;Acc:H2QLG5]	ENSPTRT00000026597	271	442	+
ENSPTRG00000014231	ASCC2	Activating signal cointegrator 1 complex subunit 2; Uncharacterized protein [Source:UniProtKB/TrEMBL;Acc:H2QLG6]	ENSPTRT00000026599	1571	1710	+
ENSPTRG00000005925	BORA	bora, aurora kinase A activator [Source:HGNC Symbol;Acc:HGNC:24724]	ENSPTRT00000010877	1741	1977	+
ENSPTRG00000002239	IDI1	isopentenyl-diphosphate delta isomerase 1 [Source:HGNC Symbol;Acc:HGNC:5387]	ENSPTRT00000004100	731	919	+
ENSPTRG00000020127	HMBOX1	Homeobox containing 1; Uncharacterized protein [Source:UniProtKB/TrEMBL;Acc:H2RB06]	ENSPTRT00000062276	3011	3120	+
ENSPTRG00000007751	C16orf72	chromosome 16 open reading frame 72 [Source:HGNC Symbol;Acc:HGNC:30103]	ENSPTRT00000014286	221	473	+
ENSPTRG00000013972			ENSPTRT00000063935	2301	2450	+
ENSPTRG00000023437	KIF13B	Kinesin family member 13B; Uncharacterized protein [Source:UniProtKB/TrEMBL;Acc:H2QZJ7]	ENSPTRT00000043060	5431	5640	+
ENSPTRG00000005926	DIS3	DIS3 mitotic control homolog; Uncharacterized protein [Source:UniProtKB/TrEMBL;Acc:H2RA29]	ENSPTRT00000060154	2881	3300	+
ENSPTRG00000014232	MTMR3	Myotubularin related protein 3; Uncharacterized protein [Source:UniProtKB/TrEMBL;Acc:H2QLG7]	ENSPTRT00000026601	3821	4164	+
ENSPTRG00000007756	EMP2	Pan troglodytes epithelial membrane protein 2 (EMP2), mRNA. [Source:RefSeq mRNA;Acc:NM_001105239]	ENSPTRT00000014292	1	100	+
ENSPTRG00000002243	PFKP	6-phosphofructokinase [Source:UniProtKB/TrEMBL;Acc:H2Q1J5]	ENSPTRT00000004106	2551	2698	+
ENSPTRG00000007758	NUBP1	nucleotide binding protein 1 [Source:HGNC Symbol;Acc:HGNC:8041]	ENSPTRT00000014294	48	230	+
ENSPTRG00000009923	TTC39C	tetratricopeptide repeat domain 39C [Source:HGNC Symbol;Acc:HGNC:26595]	ENSPTRT00000018221	1451	1690	+
ENSPTRG00000022972	PFKL	phosphofructokinase, liver [Source:HGNC Symbol;Acc:HGNC:8876]	ENSPTRT00000045146	2391	2540	+
ENSPTRG00000007761	CIITA	class II, major histocompatibility complex, transactivator [Source:HGNC Symbol;Acc:HGNC:7067]	ENSPTRT00000014299	4301	4478	+
ENSPTRG00000000335	TCEB3	Uncharacterized protein [Source:UniProtKB/TrEMBL;Acc:H2PYB0]	ENSPTRT00000000660	2201	2330	+
ENSPTRG00000002244	PITRM1	pitrilysin metallopeptidase 1 [Source:HGNC Symbol;Acc:HGNC:17663]	ENSPTRT00000004107	3181	3485	+
ENSPTRG00000000336	PITHD1	PITH (C-terminal proteasome-interacting domain of thioredoxin-like) domain containing 1 [Source:HGNC Symbol;Acc:HGNC:25022]	ENSPTRT00000000661	631	960	+
ENSPTRG00000008525	INPP5K	inositol polyphosphate-5-phosphatase K [Source:HGNC Symbol;Acc:HGNC:33882]	ENSPTRT00000049940	2831	2979	+
ENSPTRG00000014706	CMC1	COX assembly mitochondrial protein homolog; Uncharacterized protein [Source:UniProtKB/TrEMBL;Acc:H2QM80]	ENSPTRT00000027509	421	520	+
ENSPTRG00000014707	AZI2	5-azacytidine induced 2 [Source:HGNC Symbol;Acc:HGNC:24002]	ENSPTRT00000027510	1591	1900	+
ENSPTRG00000020129	DUSP4	Dual specificity protein phosphatase [Source:UniProtKB/TrEMBL;Acc:H2QVZ3]	ENSPTRT00000037282	1471	1720	+
ENSPTRG00000020131	TMEM66	Transmembrane protein 66; Uncharacterized protein [Source:UniProtKB/TrEMBL;Acc:H2QVZ5]	ENSPTRT00000037284	441	730	+
ENSPTRG00000004624	SLC2A14	solute carrier family 2 (facilitated glucose transporter), member 14 [Source:HGNC Symbol;Acc:HGNC:18301]	ENSPTRT00000008543	1971	2079	+
ENSPTRG00000007763	CLEC16A	Uncharacterized protein [Source:UniProtKB/TrEMBL;Acc:H2RAD6]	ENSPTRT00000014301	3151	3290	+
ENSPTRG00000016821	PRKAA1	protein kinase, AMP-activated, alpha 1 catalytic subunit [Source:HGNC Symbol;Acc:HGNC:9376]	ENSPTRT00000046291	1671	1790	+
ENSPTRG00000008526	PITPNA	phosphatidylinositol transfer protein, alpha [Source:HGNC Symbol;Acc:HGNC:9001]	ENSPTRT00000015723	481	620	+
ENSPTRG00000014238		Uncharacterized protein [Source:UniProtKB/TrEMBL;Acc:H2RCM7]	ENSPTRT00000065976	1441	1590	+
ENSPTRG00000004626	SLC2A3	Solute carrier family 2 (Facilitated glucose transporter), member 3; Uncharacterized protein [Source:UniProtKB/TrEMBL;Acc:H2Q5D0]	ENSPTRT00000008546	2340	2511	+
ENSPTRG00000000339	HMGCL	3-hydroxymethyl-3-methylglutaryl-CoA lyase; Uncharacterized protein [Source:UniProtKB/TrEMBL;Acc:H2PYB3]	ENSPTRT00000000664	984	1598	+
ENSPTRG00000007772	LITAF	Lipopolysaccharide-induced TNF factor; Uncharacterized protein [Source:UniProtKB/TrEMBL;Acc:H2RAD4]	ENSPTRT00000060391	1721	1880	+
ENSPTRG00000005932	TBC1D4	TBC1 domain family, member 4 [Source:HGNC Symbol;Acc:HGNC:19165]	ENSPTRT00000010889	4001	4443	+
ENSPTRG00000004629	FOXJ2	Forkhead box J2; Uncharacterized protein [Source:UniProtKB/TrEMBL;Acc:H2Q5D1]	ENSPTRT00000008551	1171	1270	+
ENSPTRG00000021955	RRAGB	Ras-related GTP binding B [Source:HGNC Symbol;Acc:HGNC:19901]	ENSPTRT00000040836	501	700	+
ENSPTRG00000016819	PTGER4	Pan troglodytes prostaglandin E receptor 4 (subtype EP4) (PTGER4), mRNA. [Source:RefSeq mRNA;Acc:NM_001009078]	ENSPTRT00000031222	1571	1700	+
ENSPTRG00000007774	TXNDC11	thioredoxin domain containing 11 [Source:HGNC Symbol;Acc:HGNC:28030]	ENSPTRT00000046922	2801	3011	+
ENSPTRG00000008527	SLC43A2	solute carrier family 43 (amino acid system L transporter), member 2 [Source:HGNC Symbol;Acc:HGNC:23087]	ENSPTRT00000015724	2451	2588	+
ENSPTRG00000023277	NECAP1	NECAP endocytosis associated 1; Uncharacterized protein [Source:UniProtKB/TrEMBL;Acc:H2QZF1]	ENSPTRT00000042805	781	1069	+
ENSPTRG00000021957	KLF8	Kruppel-like factor 8; Uncharacterized protein [Source:UniProtKB/TrEMBL;Acc:H2R432]	ENSPTRT00000050105	1071	1250	+
ENSPTRG00000000340	FUCA1	fucosidase, alpha-L- 1, tissue [Source:HGNC Symbol;Acc:HGNC:4006]	ENSPTRT00000000666	1057	1220	+
ENSPTRG00000005933	COMMD6	Uncharacterized protein [Source:UniProtKB/TrEMBL;Acc:H2RA27]	ENSPTRT00000060147	311	443	+
ENSPTRG00000007776	ZC3H7A	Uncharacterized protein; Zinc finger CCCH-type containing 7A [Source:UniProtKB/TrEMBL;Acc:H2QAL2]	ENSPTRT00000014316	2880	3442	+
ENSPTRG00000022529	GTF2E2	General transcription factor IIE, polypeptide 2, beta 34kDa; Uncharacterized protein [Source:UniProtKB/TrEMBL;Acc:H2QZJ1]	ENSPTRT00000049758	921	1150	+
ENSPTRG00000022763	PNRC2	Pan troglodytes proline-rich nuclear receptor coactivator 2 (PNRC2), mRNA. [Source:RefSeq mRNA;Acc:NM_001252002]	ENSPTRT00000045740	1601	1830	+
ENSPTRG00000002245	KLF6	Kruppel-like factor 6; Uncharacterized protein [Source:UniProtKB/TrEMBL;Acc:H2Q1J6]	ENSPTRT00000004108	1301	1700	+
ENSPTRG00000005934	UCHL3	ubiquitin carboxyl-terminal esterase L3 (ubiquitin thiolesterase) [Source:HGNC Symbol;Acc:HGNC:12515]	ENSPTRT00000060146	301	480	+
ENSPTRG00000016811	RICTOR	RPTOR independent companion of MTOR, complex 2 [Source:HGNC Symbol;Acc:HGNC:28611]	ENSPTRT00000050416	5131	5501	+
ENSPTRG00000024234	SFRS13A	Serine/arginine-rich splicing factor 10; Uncharacterized protein [Source:UniProtKB/TrEMBL;Acc:H2R9C4]	ENSPTRT00000059495	711	970	+
ENSPTRG00000009931	SS18	Uncharacterized protein [Source:UniProtKB/TrEMBL;Acc:H2QED4]	ENSPTRT00000018237	1181	1428	+
ENSPTRG00000019187	IKZF1	IKAROS family zinc finger 1 (Ikaros) [Source:HGNC Symbol;Acc:HGNC:13176]	ENSPTRT00000035456	4931	5075	+
ENSPTRG00000008529	SCARF1	scavenger receptor class F, member 1 [Source:HGNC Symbol;Acc:HGNC:16820]	ENSPTRT00000015727	1491	1678	+
ENSPTRG00000021964	ARHGEF9	Cdc42 guanine nucleotide exchange factor (GEF) 9; Uncharacterized protein [Source:UniProtKB/TrEMBL;Acc:H2R2Z7]	ENSPTRT00000042835	1951	2190	+
ENSPTRG00000020138	GSR	Glutathione reductase; Uncharacterized protein [Source:UniProtKB/TrEMBL;Acc:H2QVZ8]	ENSPTRT00000037300	1431	1739	+
ENSPTRG00000014713	STT3B	STT3, subunit of the oligosaccharyltransferase complex, homolog B; Uncharacterized protein [Source:UniProtKB/TrEMBL;Acc:H2QM84]	ENSPTRT00000027519	2171	2380	+
ENSPTRG00000039576	PRPF8	pre-mRNA processing factor 8 [Source:HGNC Symbol;Acc:HGNC:17340]	ENSPTRT00000074067	253	470	+
ENSPTRG00000008535	WDR81	WD repeat domain 81 [Source:HGNC Symbol;Acc:HGNC:26600]	ENSPTRT00000049817	5691	5850	+
ENSPTRG00000020145	WRN	Werner syndrome, RecQ helicase-like [Source:HGNC Symbol;Acc:HGNC:12791]	ENSPTRT00000037311	4351	4570	+
ENSPTRG00000005940	CLN5	ceroid-lipofuscinosis, neuronal 5 [Source:HGNC Symbol;Acc:HGNC:2076]	ENSPTRT00000010900	1981	2341	+
ENSPTRG00000014720	CMTM6	Pan troglodytes CKLF-like MARVEL transmembrane domain containing 6 (CMTM6), mRNA. [Source:RefSeq mRNA;Acc:NM_001246505]	ENSPTRT00000027532	1836	2033	+
ENSPTRG00000014721	DYNC1LI1	Dynein, cytoplasmic 1, light intermediate chain 1; Uncharacterized protein [Source:UniProtKB/TrEMBL;Acc:H2QM89]	ENSPTRT00000027533	1731	1856	+
ENSPTRG00000007956	SNX29	Uncharacterized protein [Source:UniProtKB/TrEMBL;Acc:H2QZP3]	ENSPTRT00000049924	691	1010	+
ENSPTRG00000007785	SNX29	sorting nexin 29 [Source:HGNC Symbol;Acc:HGNC:30542]	ENSPTRT00000014328	5221	5450	+
ENSPTRG00000022568	FBXL3	F-box and leucine-rich repeat protein 3 [Source:HGNC Symbol;Acc:HGNC:13599]	ENSPTRT00000047025	1571	1680	+
ENSPTRG00000013990	UBE2G2	Ubiquitin-conjugating enzyme E2G 2; Uncharacterized protein [Source:UniProtKB/TrEMBL;Acc:H2QL51]	ENSPTRT00000026103	2504	2690	+
ENSPTRG00000005943	MYCBP2	MYC binding protein 2, E3 ubiquitin protein ligase [Source:HGNC Symbol;Acc:HGNC:23386]	ENSPTRT00000042824	13911	14369	+
ENSPTRG00000014244	MTFP1	mitochondrial fission process 1 [Source:HGNC Symbol;Acc:HGNC:26945]	ENSPTRT00000044457	881	1256	+
ENSPTRG00000013992	PTTG1IP	Pituitary tumor-transforming 1 interacting protein; Uncharacterized protein [Source:UniProtKB/TrEMBL;Acc:H2QL53]	ENSPTRT00000026105	2451	2620	+
ENSPTRG00000021970	LAS1L	LAS1-like (S. cerevisiae) [Source:HGNC Symbol;Acc:HGNC:25726]	ENSPTRT00000040860	1431	1670	+
ENSPTRG00000014722	CNOT10	CCR4-NOT transcription complex, subunit 10; Uncharacterized protein [Source:UniProtKB/TrEMBL;Acc:H2QM90]	ENSPTRT00000027534	2411	2610	+
ENSPTRG00000002254	NET1	Neuroepithelial cell transforming 1; Uncharacterized protein [Source:UniProtKB/TrEMBL;Acc:H2Q1K3]	ENSPTRT00000004135	1740	1963	+
ENSPTRG00000013993	ITGB2	Pan troglodytes integrin, beta 2 (complement component 3 receptor 3 and 4 subunit) (ITGB2), mRNA. [Source:RefSeq mRNA;Acc:NM_001034122]	ENSPTRT00000062457	2604	2915	+
ENSPTRG00000008538	SMYD4	SET and MYND domain containing 4 [Source:HGNC Symbol;Acc:HGNC:21067]	ENSPTRT00000015750	2381	2580	+
ENSPTRG00000008539	RPA1	Replication protein A1, 70kDa; Uncharacterized protein [Source:UniProtKB/TrEMBL;Acc:H2QBU7]	ENSPTRT00000015751	2471	2600	+
ENSPTRG00000000343	IFNLR1	interferon, lambda receptor 1 [Source:HGNC Symbol;Acc:HGNC:18584]	ENSPTRT00000042722	1391	1610	+
ENSPTRG00000020149	MAK16	MAK16 homolog; Uncharacterized protein [Source:UniProtKB/TrEMBL;Acc:H2QW04]	ENSPTRT00000037326	3411	3550	+
ENSPTRG00000022895	ASB13	Ankyrin repeat and SOCS box containing 13; Uncharacterized protein [Source:UniProtKB/TrEMBL;Acc:H2R1U5]	ENSPTRT00000046981	2201	2440	+
ENSPTRG00000007792	PARN	poly(A)-specific ribonuclease [Source:HGNC Symbol;Acc:HGNC:8609]	ENSPTRT00000014343	1721	2050	+
ENSPTRG00000016806	WDR70	Uncharacterized protein; WD repeat domain 70 [Source:UniProtKB/TrEMBL;Acc:H2QQS6]	ENSPTRT00000031199	471	570	+
ENSPTRG00000000344	GRHL3	grainyhead-like 3 (Drosophila) [Source:HGNC Symbol;Acc:HGNC:25839]	ENSPTRT00000067825	2191	2471	+
ENSPTRG00000014726	GLB1	Beta-galactosidase [Source:UniProtKB/TrEMBL;Acc:H2QM92]	ENSPTRT00000027543	1941	2300	+
ENSPTRG00000002258	FAM208B	family with sequence similarity 208, member B [Source:HGNC Symbol;Acc:HGNC:23484]	ENSPTRT00000048138	6501	6600	+
ENSPTRG00000020150	TTI2	Pan troglodytes TELO2 interacting protein 2 (TTI2), mRNA. [Source:RefSeq mRNA;Acc:NM_001246539]	ENSPTRT00000045048	771	980	+
ENSPTRG00000008542	DPH1	Diphthamide biosynthesis protein 1 [Source:UniProtKB/TrEMBL;Acc:H2QBU9]	ENSPTRT00000015756	21	130	+
ENSPTRG00000014251	PES1	Pan troglodytes pescadillo ribosomal biogenesis factor 1 (PES1), mRNA. [Source:RefSeq mRNA;Acc:NM_001246365]	ENSPTRT00000026625	1381	1930	+
ENSPTRG00000004647	PHC1	Polyhomeotic homolog 1; Uncharacterized protein [Source:UniProtKB/TrEMBL;Acc:H2R7I8]	ENSPTRT00000057571	2851	3010	+
ENSPTRG00000004648	M6PR	mannose-6-phosphate receptor (cation dependent) [Source:HGNC Symbol;Acc:HGNC:6752]	ENSPTRT00000008593	2214	2437	+
ENSPTRG00000002259	GDI2	GDP dissociation inhibitor 2; Uncharacterized protein [Source:UniProtKB/TrEMBL;Acc:H2R4A9]	ENSPTRT00000004142	2301	2410	+
ENSPTRG00000013997	ADARB1	RNA-specific adenosine deaminase B1 isoform 2 [Source:RefSeq peptide;Acc:NP_001155266]	ENSPTRT00000026120	4621	4880	+
ENSPTRG00000008543	HIC1	hypermethylated in cancer 1 [Source:HGNC Symbol;Acc:HGNC:4909]	ENSPTRT00000015757	321	481	+
ENSPTRG00000008544	SMG6	SMG6 nonsense mediated mRNA decay factor [Source:HGNC Symbol;Acc:HGNC:17809]	ENSPTRT00000015761	3475	3720	+
ENSPTRG00000000346	NIPAL3	NIPA-like domain containing 3 [Source:HGNC Symbol;Acc:HGNC:25233]	ENSPTRT00000000685	1409	1710	+
ENSPTRG00000004650	A2M	Alpha-2-macroglobulin; Uncharacterized protein [Source:UniProtKB/TrEMBL;Acc:H2RC06]	ENSPTRT00000065031	1991	2090	+
ENSPTRG00000005945	SLAIN1	SLAIN motif family, member 1 [Source:HGNC Symbol;Acc:HGNC:26387]	ENSPTRT00000045796	251	450	+
ENSPTRG00000007794	BFAR	Bifunctional apoptosis regulator; Uncharacterized protein [Source:UniProtKB/TrEMBL;Acc:H2QAM1]	ENSPTRT00000014345	1871	2070	+
ENSPTRG00000014728	CRTAP	Cartilage associated protein; Uncharacterized protein [Source:UniProtKB/TrEMBL;Acc:H2QM93]	ENSPTRT00000027549	3801	3919	+
ENSPTRG00000007799	PDXDC1	Uncharacterized protein [Source:UniProtKB/TrEMBL;Acc:H2QAM2]	ENSPTRT00000014352	2831	3090	+
ENSPTRG00000000349	SRRM1	serine/arginine repetitive matrix 1 [Source:HGNC Symbol;Acc:HGNC:16638]	ENSPTRT00000000690	2591	2768	+
ENSPTRG00000021982	STARD8	StAR-related lipid transfer (START) domain containing 8 [Source:HGNC Symbol;Acc:HGNC:19161]	ENSPTRT00000040891	441	620	+
ENSPTRG00000005949	RBM26	RNA binding motif protein 26 [Source:HGNC Symbol;Acc:HGNC:20327]	ENSPTRT00000010927	2884	3010	+
ENSPTRG00000002261	FBXO18	F-box protein, helicase, 18 [Source:HGNC Symbol;Acc:HGNC:13620]	ENSPTRT00000004144	2611	2759	+
ENSPTRG00000008547	TSR1	TSR1, 20S rRNA accumulation, homolog; Uncharacterized protein [Source:UniProtKB/TrEMBL;Acc:H2QBV3]	ENSPTRT00000015769	2731	2930	+
ENSPTRG00000021990	IGBP1	immunoglobulin (CD79A) binding protein 1 [Source:HGNC Symbol;Acc:HGNC:5461]	ENSPTRT00000040901	171	350	+
ENSPTRG00000020158	ERLIN2	ER lipid raft associated 2; Uncharacterized protein [Source:UniProtKB/TrEMBL;Acc:H2QW08]	ENSPTRT00000037340	861	1280	+
ENSPTRG00000015806	PIGG	Phosphatidylinositol glycan anchor biosynthesis, class G; Uncharacterized protein [Source:UniProtKB/TrEMBL;Acc:H2QP26]	ENSPTRT00000029496	2971	3180	+
ENSPTRG00000008548	SGSM2	small G protein signaling modulator 2 [Source:HGNC Symbol;Acc:HGNC:29026]	ENSPTRT00000015770	3491	3770	+
ENSPTRG00000000350	CLIC4	Chloride intracellular channel 4; Uncharacterized protein [Source:UniProtKB/TrEMBL;Acc:H2PYC1]	ENSPTRT00000000692	1931	2090	+
ENSPTRG00000002262	IL15RA	interleukin 15 receptor, alpha [Source:HGNC Symbol;Acc:HGNC:5978]	ENSPTRT00000004147	1361	1535	+
ENSPTRG00000020160	PROSC	Proline synthetase co-transcribed homolog (Bacterial); Uncharacterized protein [Source:UniProtKB/TrEMBL;Acc:H2QW09]	ENSPTRT00000037344	721	950	+
ENSPTRG00000000351	RUNX3	runt-related transcription factor 3 [Source:HGNC Symbol;Acc:HGNC:10473]	ENSPTRT00000000695	1951	2280	+
ENSPTRG00000002263	IL2RA	Pan troglodytes interleukin 2 receptor, alpha (IL2RA), mRNA. [Source:RefSeq mRNA;Acc:NM_001035520]	ENSPTRT00000004148	1251	1500	+
ENSPTRG00000021995	PDZD11	PDZ domain containing 11; Uncharacterized protein [Source:UniProtKB/TrEMBL;Acc:H2QYR4]	ENSPTRT00000040913	901	1012	+
ENSPTRG00000007800	NTAN1	N-terminal asparagine amidase; Uncharacterized protein [Source:UniProtKB/TrEMBL;Acc:H2QAM3]	ENSPTRT00000014358	801	1080	+
ENSPTRG00000014733	UBP1	Uncharacterized protein; Upstream binding protein 1 (LBP-1a) [Source:UniProtKB/TrEMBL;Acc:H2QM95]	ENSPTRT00000027554	2030	2420	+
ENSPTRG00000002265	RBM17	RNA binding motif protein 17; Uncharacterized protein [Source:UniProtKB/TrEMBL;Acc:H2Q1L0]	ENSPTRT00000004151	1301	1495	+
ENSPTRG00000015813	PCGF3	Uncharacterized protein [Source:UniProtKB/TrEMBL;Acc:H2R3G6]	ENSPTRT00000047926	901	1450	+
ENSPTRG00000016801	NIPBL	Nipped-B homolog; Uncharacterized protein [Source:UniProtKB/TrEMBL;Acc:H2R5I6]	ENSPTRT00000031189	8641	9050	+
ENSPTRG00000007801	RRN3	RRN3 RNA polymerase I transcription factor homolog; Uncharacterized protein [Source:UniProtKB/TrEMBL;Acc:H2QAM4]	ENSPTRT00000014360	2459	2830	+
ENSPTRG00000009948	DSG2	desmoglein 2 [Source:HGNC Symbol;Acc:HGNC:3049]	ENSPTRT00000018263	2621	2760	+
ENSPTRG00000020163	BRF2	BRF2, subunit of RNA polymerase III transcription initiation factor, BRF1-like; Uncharacterized protein [Source:UniProtKB/TrEMBL;Acc:H2QW11]	ENSPTRT00000037350	1201	1350	+
ENSPTRG00000015815	GAK	Cyclin G associated kinase; Uncharacterized protein [Source:UniProtKB/TrEMBL;Acc:H2QP29]	ENSPTRT00000029516	3061	3200	+
ENSPTRG00000005967	TGDS	TDP-glucose 4,6-dehydratase; Uncharacterized protein [Source:UniProtKB/TrEMBL;Acc:H2Q7P8]	ENSPTRT00000010950	98	220	+
ENSPTRG00000020164	RAB11FIP1	RAB11 family interacting protein 1 (class I) [Source:HGNC Symbol;Acc:HGNC:30265]	ENSPTRT00000037352	7301	7429	+
ENSPTRG00000008550	METTL16	Methyltransferase like 16; Uncharacterized protein [Source:UniProtKB/TrEMBL;Acc:H2QBV6]	ENSPTRT00000015772	1331	1880	+
ENSPTRG00000014734	CLASP2	cytoplasmic linker associated protein 2 [Source:HGNC Symbol;Acc:HGNC:17078]	ENSPTRT00000045131	4701	4890	+
ENSPTRG00000022700	EIF4EBP1	eukaryotic translation initiation factor 4E binding protein 1 [Source:HGNC Symbol;Acc:HGNC:3288]	ENSPTRT00000044280	721	840	+
ENSPTRG00000002267	PFKFB3	6-phosphofructo-2-kinase/fructose-2, 6-biphosphatase 3; Uncharacterized protein [Source:UniProtKB/TrEMBL;Acc:H2Q1L1]	ENSPTRT00000004153	2301	2840	+
ENSPTRG00000020167	ASH2L	Ash2 (Absent, small, or homeotic)-like; Uncharacterized protein [Source:UniProtKB/TrEMBL;Acc:H2R2S9]	ENSPTRT00000047384	1921	2230	+
ENSPTRG00000004657	CLEC2D	C-type lectin domain family 2, member D [Source:HGNC Symbol;Acc:HGNC:14351]	ENSPTRT00000008617	631	910	+
ENSPTRG00000005968	GPR180	G protein-coupled receptor 180; Uncharacterized protein [Source:UniProtKB/TrEMBL;Acc:H2Q7P9]	ENSPTRT00000010952	1371	1571	+
ENSPTRG00000009950	B4GALT6	UDP-Gal:betaGlcNAc beta 1,4-galactosyltransferase, polypeptide 6; Uncharacterized protein [Source:UniProtKB/TrEMBL;Acc:H2QEE7]	ENSPTRT00000018266	2001	2130	+
ENSPTRG00000022721	SEPN1	selenoprotein N, 1 [Source:HGNC Symbol;Acc:HGNC:15999]	ENSPTRT00000044129	1821	1930	+
ENSPTRG00000014264	RNF185	Ring finger protein 185; Uncharacterized protein [Source:UniProtKB/TrEMBL;Acc:H2QLI3]	ENSPTRT00000026651	1531	1810	+
ENSPTRG00000004659	CD69	CD69 molecule [Source:HGNC Symbol;Acc:HGNC:1694]	ENSPTRT00000008619	611	1127	+
ENSPTRG00000020786	PSIP1	PC4 and SFRS1 interacting protein 1; Uncharacterized protein [Source:UniProtKB/TrEMBL;Acc:H2QX09]	ENSPTRT00000038464	1721	1980	+
ENSPTRG00000019198	VOPP1	vesicular, overexpressed in cancer, prosurvival protein 1 [Source:HGNC Symbol;Acc:HGNC:34518]	ENSPTRT00000035486	1371	1520	+
ENSPTRG00000009952	TRAPPC8	Trafficking protein particle complex 8; Uncharacterized protein [Source:UniProtKB/TrEMBL;Acc:H2QEE8]	ENSPTRT00000018269	4431	5000	+
ENSPTRG00000000365	FAM54B	Pan troglodytes family with sequence similarity 54, member B (FAM54B), mRNA. [Source:RefSeq mRNA;Acc:NM_001246545]	ENSPTRT00000059472	1171	1420	+
ENSPTRG00000008552	CLUH	clustered mitochondria (cluA/CLU1) homolog [Source:HGNC Symbol;Acc:HGNC:29094]	ENSPTRT00000050643	2911	3320	+
ENSPTRG00000004661	CLEC2B	C-type lectin domain family 2, member B; Uncharacterized protein [Source:UniProtKB/TrEMBL;Acc:H2Q5E6]	ENSPTRT00000008623	551	660	+
ENSPTRG00000014266	LIMK2	LIM domain kinase 2 [Source:HGNC Symbol;Acc:HGNC:6614]	ENSPTRT00000026659	1827	2042	+
ENSPTRG00000014267	PIK3IP1	Phosphoinositide-3-kinase interacting protein 1; Uncharacterized protein [Source:UniProtKB/TrEMBL;Acc:H2QLI4]	ENSPTRT00000026660	871	1132	+
ENSPTRG00000019204	GBAS	Glioblastoma amplified sequence; Uncharacterized protein [Source:UniProtKB/TrEMBL;Acc:H2QUL7]	ENSPTRT00000035493	1051	1234	+
ENSPTRG00000014735	PDCD6IP	Programmed cell death 6 interacting protein; Uncharacterized protein [Source:UniProtKB/TrEMBL;Acc:H2QM96]	ENSPTRT00000027559	2731	3110	+
ENSPTRG00000003438	HTATIP2	HIV-1 Tat interactive protein 2, 30kDa; Uncharacterized protein [Source:UniProtKB/TrEMBL;Acc:H2Q3A7]	ENSPTRT00000006487	1361	1470	+
ENSPTRG00000015825	SPON2	Spondin 2, extracellular matrix protein; Uncharacterized protein [Source:UniProtKB/TrEMBL;Acc:H2QP32]	ENSPTRT00000029537	1161	1380	+
ENSPTRG00000000367	PAQR7	Progestin and adipoQ receptor family member VII; Uncharacterized protein [Source:UniProtKB/TrEMBL;Acc:H2PYC9]	ENSPTRT00000000736	1411	1690	+
ENSPTRG00000020170	BAG4	BCL2-associated athanogene 4; Uncharacterized protein [Source:UniProtKB/TrEMBL;Acc:H2QW14]	ENSPTRT00000037362	1771	2089	+
ENSPTRG00000014268	PATZ1	POZ (BTB) and AT hook containing zinc finger 1; Uncharacterized protein [Source:UniProtKB/TrEMBL;Acc:H2QLI5]	ENSPTRT00000026663	831	1385	+
ENSPTRG00000000370	PAFAH2	Platelet-activating factor acetylhydrolase 2, 40kDa; Uncharacterized protein [Source:UniProtKB/TrEMBL;Acc:H2PYD1]	ENSPTRT00000000740	1441	1882	+
ENSPTRG00000007807	KIAA0430	KIAA0430; Uncharacterized protein [Source:UniProtKB/TrEMBL;Acc:H2QAM6]	ENSPTRT00000014372	7071	7535	+
ENSPTRG00000003439	PRMT3	Protein arginine methyltransferase 3; Uncharacterized protein [Source:UniProtKB/TrEMBL;Acc:H2Q3A8]	ENSPTRT00000006489	1801	1940	+
ENSPTRG00000019205	PSPH	Phosphoserine phosphatase; Uncharacterized protein [Source:UniProtKB/TrEMBL;Acc:H2QUL8]	ENSPTRT00000035496	1391	1492	+
ENSPTRG00000015827	CTBP1	C-terminal binding protein 1 [Source:HGNC Symbol;Acc:HGNC:2494]	ENSPTRT00000029539	1661	1770	+
ENSPTRG00000016798	NADK2	NAD kinase 2, mitochondrial [Source:HGNC Symbol;Acc:HGNC:26404]	ENSPTRT00000031185	1411	1632	+
ENSPTRG00000014272	DRG1	Developmentally regulated GTP binding protein 1; Uncharacterized protein [Source:UniProtKB/TrEMBL;Acc:H2QLI6]	ENSPTRT00000026668	1221	1382	+
ENSPTRG00000015829	MAEA	macrophage erythroblast attacher [Source:HGNC Symbol;Acc:HGNC:13731]	ENSPTRT00000029544	1931	2160	+
ENSPTRG00000019206	CCT6A	Chaperonin containing TCP1, subunit 6A (Zeta 1); Uncharacterized protein [Source:UniProtKB/TrEMBL;Acc:H2QUL9]	ENSPTRT00000035497	2291	2400	+
ENSPTRG00000014017	LSS	Lanosterol synthase (2,3-oxidosqualene-lanosterol cyclase); Uncharacterized protein [Source:UniProtKB/TrEMBL;Acc:H2R1N5]	ENSPTRT00000042387	11	200	+
ENSPTRG00000002271	SFMBT2	Scm-like with four mbt domains 2 [Source:HGNC Symbol;Acc:HGNC:20256]	ENSPTRT00000004162	2071	2270	+
ENSPTRG00000020172	PPAPDC1B	Phosphatidic acid phosphatase type 2 domain containing 1B; Uncharacterized protein [Source:UniProtKB/TrEMBL;Acc:H2QW16]	ENSPTRT00000037364	621	810	+
ENSPTRG00000020173	WHSC1L1	Uncharacterized protein; Wolf-Hirschhorn syndrome candidate 1-like 1 [Source:UniProtKB/TrEMBL;Acc:H2R3Q8]	ENSPTRT00000045036	1551	1980	+
ENSPTRG00000000375	ZNF593	Uncharacterized protein; Zinc finger protein 593 [Source:UniProtKB/TrEMBL;Acc:H2PYD5]	ENSPTRT00000000746	461	640	+
ENSPTRG00000002276	KIN	KIN, antigenic determinant of recA protein homolog; Uncharacterized protein [Source:UniProtKB/TrEMBL;Acc:H2Q1L5]	ENSPTRT00000004175	491	610	+
ENSPTRG00000015830	UVSSA	UV-stimulated scaffold protein A [Source:HGNC Symbol;Acc:HGNC:29304]	ENSPTRT00000060388	2741	2920	+
ENSPTRG00000014019	MCM3AP	minichromosome maintenance complex component 3 associated protein [Source:HGNC Symbol;Acc:HGNC:6946]	ENSPTRT00000026172	5941	6109	+
ENSPTRG00000014273	EIF4ENIF1	Eukaryotic translation initiation factor 4E nuclear import factor 1; Uncharacterized protein [Source:UniProtKB/TrEMBL;Acc:H2R1P7]	ENSPTRT00000044564	3081	3350	+
ENSPTRG00000007810	MYH11	myosin, heavy chain 11, smooth muscle [Source:HGNC Symbol;Acc:HGNC:7569]	ENSPTRT00000014378	5053	5170	+
ENSPTRG00000000379	SH3BGRL3	Uncharacterized protein [Source:UniProtKB/TrEMBL;Acc:H2PYD7]	ENSPTRT00000000752	1271	1485	+
ENSPTRG00000005976	DNAJC3	DnaJ (Hsp40) homolog, subfamily C, member 3; Uncharacterized protein [Source:UniProtKB/TrEMBL;Acc:H2Q7Q3]	ENSPTRT00000010969	1941	2410	+
ENSPTRG00000014741	TRANK1	tetratricopeptide repeat and ankyrin repeat containing 1 [Source:HGNC Symbol;Acc:HGNC:29011]	ENSPTRT00000027568	8281	8500	+
ENSPTRG00000019207	SUMF2	Sulfatase modifying factor 2; Uncharacterized protein [Source:UniProtKB/TrEMBL;Acc:H2QUM0]	ENSPTRT00000035498	1751	1892	+
ENSPTRG00000013144	RBCK1	RanBP-type and C3HC4-type zinc finger containing 1; Uncharacterized protein [Source:UniProtKB/TrEMBL;Acc:H2QJS6]	ENSPTRT00000024395	2351	2480	+
ENSPTRG00000016790	IL7R	interleukin 7 receptor [Source:HGNC Symbol;Acc:HGNC:6024]	ENSPTRT00000031173	1669	1800	+
ENSPTRG00000015834	TACC3	transforming, acidic coiled-coil containing protein 3 [Source:HGNC Symbol;Acc:HGNC:11524]	ENSPTRT00000029550	1011	1410	+
ENSPTRG00000022005	IL2RG	interleukin 2 receptor, gamma [Source:HGNC Symbol;Acc:HGNC:6010]	ENSPTRT00000048921	1	120	+
ENSPTRG00000014743	MLH1	MutL homolog 1, colon cancer, nonpolyposis type 2; Uncharacterized protein [Source:UniProtKB/TrEMBL;Acc:H2QMA1]	ENSPTRT00000027570	1381	1690	+
ENSPTRG00000013145	TBC1D20	TBC1 domain family, member 20 [Source:HGNC Symbol;Acc:HGNC:16133]	ENSPTRT00000024397	1621	1930	+
ENSPTRG00000020176	FGFR1	fibroblast growth factor receptor 1 [Source:HGNC Symbol;Acc:HGNC:3688]	ENSPTRT00000042198	241	480	+
ENSPTRG00000008572	CTNS	cystinosin, lysosomal cystine transporter [Source:HGNC Symbol;Acc:HGNC:2518]	ENSPTRT00000015814	901	1100	+
ENSPTRG00000022009	ZMYM3	zinc finger, MYM-type 3 [Source:HGNC Symbol;Acc:HGNC:13054]	ENSPTRT00000040959	1901	2000	+
ENSPTRG00000022010	NONO	non-POU domain containing, octamer-binding [Source:HGNC Symbol;Acc:HGNC:7871]	ENSPTRT00000040962	141	280	+
ENSPTRG00000023695	GATA3	Uncharacterized protein [Source:UniProtKB/TrEMBL;Acc:H2R285]	ENSPTRT00000046668	2251	2450	+
ENSPTRG00000000385	DHDDS	Uncharacterized protein [Source:UniProtKB/TrEMBL;Acc:H2R9B1]	ENSPTRT00000059456	843	1120	+
ENSPTRG00000006088	CCNB1IP1	Cyclin B1 interacting protein 1; Cyclin B1 interacting protein 1, E3 ubiquitin protein ligase; Uncharacterized protein [Source:UniProtKB/TrEMBL;Acc:H2QZI7]	ENSPTRT00000044936	1291	1400	+
ENSPTRG00000013147			ENSPTRT00000024402	81	280	+
ENSPTRG00000014022	C21orf58	chromosome 21 open reading frame 58 [Source:HGNC Symbol;Acc:HGNC:1300]	ENSPTRT00000026179	632	820	+
ENSPTRG00000008574	TMEM93	Transmembrane protein 93; Uncharacterized protein [Source:UniProtKB/TrEMBL;Acc:H2QBW9]	ENSPTRT00000015819	501	670	+
ENSPTRG00000002284	CELF2	CUGBP, Elav-like family member 2; Uncharacterized protein [Source:UniProtKB/TrEMBL;Acc:H2R2K8]	ENSPTRT00000044971	4141	4530	+
ENSPTRG00000019209	CHCHD2	Coiled-coil-helix-coiled-coil-helix domain containing 2; Uncharacterized protein [Source:UniProtKB/TrEMBL;Acc:H2QUM2]	ENSPTRT00000035503	33	150	+
ENSPTRG00000000386	HMGN2	high mobility group nucleosomal binding domain 2 [Source:HGNC Symbol;Acc:HGNC:4986]	ENSPTRT00000000765	1	408	+
ENSPTRG00000007812	ABCC1	ATP-binding cassette, sub-family C (CFTR/MRP), member 1 [Source:HGNC Symbol;Acc:HGNC:51]	ENSPTRT00000066941	5684	5989	+
ENSPTRG00000022012	ITGB1BP2	integrin beta 1 binding protein (melusin) 2 [Source:HGNC Symbol;Acc:HGNC:6154]	ENSPTRT00000040965	945	1190	+
ENSPTRG00000014025	DIP2A	DIP2 disco-interacting protein 2 homolog A (Drosophila) [Source:HGNC Symbol;Acc:HGNC:17217]	ENSPTRT00000026188	5491	5910	+
ENSPTRG00000013152	FAM110A	family with sequence similarity 110, member A [Source:HGNC Symbol;Acc:HGNC:16188]	ENSPTRT00000024407	821	1010	+
ENSPTRG00000013155	PSMF1	Proteasome (Prosome, macropain) inhibitor subunit 1 (PI31); Uncharacterized protein [Source:UniProtKB/TrEMBL;Acc:H2QJT2]	ENSPTRT00000024411	1261	1360	+
ENSPTRG00000042295			ENSPTRT00000073889	1193	1314	+
ENSPTRG00000022017	ACRC	acidic repeat containing [Source:HGNC Symbol;Acc:HGNC:15805]	ENSPTRT00000040978	991	1237	+
ENSPTRG00000005982	MBNL2	Uncharacterized protein [Source:UniProtKB/TrEMBL;Acc:H2RC91]	ENSPTRT00000065401	791	890	+
ENSPTRG00000014276	PISD	Phosphatidylserine decarboxylase; Uncharacterized protein [Source:UniProtKB/TrEMBL;Acc:H2QLI7]	ENSPTRT00000026679	941	1170	+
ENSPTRG00000000387	RPS6KA1	ribosomal protein S6 kinase, 90kDa, polypeptide 1 [Source:HGNC Symbol;Acc:HGNC:10430]	ENSPTRT00000000768	2843	3036	+
ENSPTRG00000006090	TEP1	telomerase-associated protein 1 [Source:HGNC Symbol;Acc:HGNC:11726]	ENSPTRT00000011176	7661	7780	+
ENSPTRG00000015838	WHSC1	Uncharacterized protein; Wolf-Hirschhorn syndrome candidate 1 [Source:UniProtKB/TrEMBL;Acc:H2QP41]	ENSPTRT00000029569	4916	5159	+
ENSPTRG00000020801	PLIN2	Perilipin 2; Uncharacterized protein [Source:UniProtKB/TrEMBL;Acc:H2QX16]	ENSPTRT00000038497	1351	1600	+
ENSPTRG00000014277	PRR14L	proline rich 14-like [Source:HGNC Symbol;Acc:HGNC:28738]	ENSPTRT00000026682	6891	6990	+
ENSPTRG00000022025	RPS4X	ribosomal protein S4, X-linked [Source:HGNC Symbol;Acc:HGNC:10424]	ENSPTRT00000040988	791	949	+
ENSPTRG00000005983	RAP2A	RAP2A, member of RAS oncogene family; Uncharacterized protein [Source:UniProtKB/TrEMBL;Acc:H2Q7Q7]	ENSPTRT00000010989	361	923	+
ENSPTRG00000005984	IPO5	importin 5 [Source:HGNC Symbol;Acc:HGNC:6402]	ENSPTRT00000010991	3421	3790	+
ENSPTRG00000004681	YBX3	Y box binding protein 3 [Source:HGNC Symbol;Acc:HGNC:2428]	ENSPTRT00000008667	1161	1310	+
ENSPTRG00000008578	C17orf85	chromosome 17 open reading frame 85 [Source:HGNC Symbol;Acc:HGNC:24612]	ENSPTRT00000015826	2421	2627	+
ENSPTRG00000020802	DENND4C	DENN/MADD domain containing 4C [Source:HGNC Symbol;Acc:HGNC:26079]	ENSPTRT00000046923	5051	5320	+
ENSPTRG00000000388	ARID1A	Uncharacterized protein [Source:UniProtKB/TrEMBL;Acc:H2PYE4]	ENSPTRT00000000772	5951	7000	+
ENSPTRG00000002286	USP6NL	USP6 N-terminal like [Source:HGNC Symbol;Acc:HGNC:16858]	ENSPTRT00000004188	2701	2991	+
ENSPTRG00000016784	BRIX1	Uncharacterized protein [Source:UniProtKB/TrEMBL;Acc:H2QQR2]	ENSPTRT00000031159	611	907	+
ENSPTRG00000014746	GOLGA4	Uncharacterized protein [Source:UniProtKB/TrEMBL;Acc:H2R2V8]	ENSPTRT00000046942	2151	2370	+
ENSPTRG00000019243	VKORC1L1	Uncharacterized protein; Vitamin K epoxide reductase complex, subunit 1-like 1 [Source:UniProtKB/TrEMBL;Acc:H2R5A6]	ENSPTRT00000035573	3641	3780	+
ENSPTRG00000006092	OSGEP	O-sialoglycoprotein endopeptidase; Uncharacterized protein [Source:UniProtKB/TrEMBL;Acc:H2Q7W2]	ENSPTRT00000011180	1301	1550	+
ENSPTRG00000019244	GUSB	Glucuronidase, beta; Uncharacterized protein [Source:UniProtKB/TrEMBL;Acc:H2QUN2]	ENSPTRT00000035574	2031	2283	+
ENSPTRG00000005985	FARP1	FERM, RhoGEF (ARHGEF) and pleckstrin domain protein 1 (Chondrocyte-derived); Uncharacterized protein [Source:UniProtKB/TrEMBL;Acc:H2Q7Q9]	ENSPTRT00000010993	4671	4872	+
ENSPTRG00000020178	TACC1	Transforming, acidic coiled-coil containing protein 1; Uncharacterized protein [Source:UniProtKB/TrEMBL;Acc:H2QW18]	ENSPTRT00000037381	5101	5270	+
ENSPTRG00000007819	XYLT1	Pan troglodytes xylosyltransferase I (XYLT1), mRNA. [Source:RefSeq mRNA;Acc:NM_001037289]	ENSPTRT00000014408	2691	2920	+
ENSPTRG00000013164	NSFL1C	NSFL1 (P97) cofactor (P47); Uncharacterized protein [Source:UniProtKB/TrEMBL;Acc:H2R963]	ENSPTRT00000059341	2061	2235	+
ENSPTRG00000002288	ECHDC3	Enoyl CoA hydratase domain containing 3; Uncharacterized protein [Source:UniProtKB/TrEMBL;Acc:H2Q1L8]	ENSPTRT00000004190	1150	1400	+
ENSPTRG00000004699	ETV6	Ets variant 6; Uncharacterized protein [Source:UniProtKB/TrEMBL;Acc:H2Q5G7]	ENSPTRT00000008692	1601	1940	+
ENSPTRG00000007823	RPS15A	Pan troglodytes ribosomal protein S15a (RPS15A), mRNA. [Source:RefSeq mRNA;Acc:NM_001251992]	ENSPTRT00000014415	411	531	+
ENSPTRG00000006093	APEX1	Pan troglodytes APEX nuclease (multifunctional DNA repair enzyme) 1 (APEX1), mRNA. [Source:RefSeq mRNA;Acc:NM_001081485]	ENSPTRT00000011181	391	490	+
ENSPTRG00000007824	ARL6IP1	ADP-ribosylation factor-like 6 interacting protein 1 [Source:HGNC Symbol;Acc:HGNC:697]	ENSPTRT00000014417	551	860	+
ENSPTRG00000014748	ITGA9	integrin, alpha 9 [Source:HGNC Symbol;Acc:HGNC:6145]	ENSPTRT00000027582	3291	3466	+
ENSPTRG00000002289	PROSER2	proline and serine rich 2 [Source:HGNC Symbol;Acc:HGNC:23728]	ENSPTRT00000057905	1585	1740	+
ENSPTRG00000023419	GPATCH3	G patch domain containing 3; Uncharacterized protein [Source:UniProtKB/TrEMBL;Acc:H2R1U3]	ENSPTRT00000045440	671	900	+
ENSPTRG00000015840	NELFA	negative elongation factor A [Source:RefSeq peptide;Acc:NP_001231577]	ENSPTRT00000029571	2571	2760	+
ENSPTRG00000002291	UPF2	UPF2 regulator of nonsense transcripts homolog (yeast) [Source:HGNC Symbol;Acc:HGNC:17854]	ENSPTRT00000004195	4541	4640	+
ENSPTRG00000012391	DDX18	DEAD (Asp-Glu-Ala-Asp) box polypeptide 18; Uncharacterized protein [Source:UniProtKB/TrEMBL;Acc:H2QIL6]	ENSPTRT00000023008	2021	2351	+
ENSPTRG00000007825	SMG1	SMG1 phosphatidylinositol 3-kinase-related kinase [Source:HGNC Symbol;Acc:HGNC:30045]	ENSPTRT00000042600	11271	11997	+
ENSPTRG00000020179	PLEKHA2	Pleckstrin homology domain containing, family A (Phosphoinositide binding specific) member 2; Uncharacterized protein [Source:UniProtKB/TrEMBL;Acc:H2QW19]	ENSPTRT00000037382	991	1270	+
ENSPTRG00000006094	TMEM55B	Transmembrane protein 55B; Uncharacterized protein [Source:UniProtKB/TrEMBL;Acc:H2Q7W3]	ENSPTRT00000011182	1371	1480	+
ENSPTRG00000022037	RLIM	Ring finger protein, LIM domain interacting; Uncharacterized protein [Source:UniProtKB/TrEMBL;Acc:H2QYT6]	ENSPTRT00000041018	901	1080	+
ENSPTRG00000039153	RPS6	ribosomal protein S6 [Source:HGNC Symbol;Acc:HGNC:10429]	ENSPTRT00000075488	571	770	+
ENSPTRG00000003457	LIN7C	Lin-7 homolog C; Uncharacterized protein [Source:UniProtKB/TrEMBL;Acc:H2R0V3]	ENSPTRT00000047055	351	620	+
ENSPTRG00000042247	TM2D2	TM2 domain containing 2; Uncharacterized protein [Source:UniProtKB/TrEMBL;Acc:H2RHU6]	ENSPTRT00000074964	551	770	+
ENSPTRG00000014027	PRMT2	Protein arginine methyltransferase 2; Uncharacterized protein [Source:UniProtKB/TrEMBL;Acc:H2QZF8]	ENSPTRT00000043476	2551	2650	+
ENSPTRG00000012394	CCDC93	Pan troglodytes coiled-coil domain containing 93 (CCDC93), mRNA. [Source:RefSeq mRNA;Acc:NM_001246416]	ENSPTRT00000023012	1181	1420	+
ENSPTRG00000020182	ADAM9	ADAM metallopeptidase domain 9; Uncharacterized protein [Source:UniProtKB/TrEMBL;Acc:H2QW21]	ENSPTRT00000037386	2603	2796	+
ENSPTRG00000006095	PNP	Purine nucleoside phosphorylase [Source:UniProtKB/TrEMBL;Acc:H2Q7W4]	ENSPTRT00000011183	1281	1492	+
ENSPTRG00000008583	ZZEF1	Uncharacterized protein [Source:UniProtKB/TrEMBL;Acc:H2QBX5]	ENSPTRT00000015845	10411	10530	+
ENSPTRG00000004704	DUSP16	Dual specificity phosphatase 16; Uncharacterized protein [Source:UniProtKB/TrEMBL;Acc:H2Q5H0]	ENSPTRT00000008701	2503	2766	+
ENSPTRG00000005991	DOCK9	dedicator of cytokinesis 9 [Source:HGNC Symbol;Acc:HGNC:14132]	ENSPTRT00000063936	6431	6905	+
ENSPTRG00000022047	ATRX	transcriptional regulator ATRX [Source:RefSeq peptide;Acc:NP_001009018]	ENSPTRT00000062063	1371	1550	+
ENSPTRG00000015844	MXD4	Uncharacterized protein [Source:UniProtKB/TrEMBL;Acc:H2R3G9]	ENSPTRT00000048052	281	470	+
ENSPTRG00000000401	WDTC1	Uncharacterized protein; WD and tetratricopeptide repeats 1 [Source:UniProtKB/TrEMBL;Acc:H2PYF0]	ENSPTRT00000000791	1901	2090	+
ENSPTRG00000009965	MAPRE2	microtubule-associated protein, RP/EB family, member 2 [Source:HGNC Symbol;Acc:HGNC:6891]	ENSPTRT00000018289	861	1180	+
ENSPTRG00000013171	SIRPA	Uncharacterized protein [Source:UniProtKB/TrEMBL;Acc:H2R958]	ENSPTRT00000024446	2171	2311	+
ENSPTRG00000016775	TARS	Threonyl-tRNA synthetase; Uncharacterized protein [Source:UniProtKB/TrEMBL;Acc:H2QQQ4]	ENSPTRT00000031143	2711	2820	+
ENSPTRG00000015847	FAM193A	family with sequence similarity 193, member A [Source:HGNC Symbol;Acc:HGNC:16822]	ENSPTRT00000060373	3991	4110	+
ENSPTRG00000006101	RNASE4	Pan troglodytes ribonuclease, RNase A family, 4 (RNASE4), mRNA. [Source:RefSeq mRNA;Acc:NM_001009107]	ENSPTRT00000062418	731	920	+
ENSPTRG00000004707	CDKN1B	Cyclin-dependent kinase inhibitor 1B (P27, Kip1); Uncharacterized protein [Source:UniProtKB/TrEMBL;Acc:H2Q5H2]	ENSPTRT00000008705	1081	1350	+
ENSPTRG00000022048	MAGT1	magnesium transporter 1 [Source:HGNC Symbol;Acc:HGNC:28880]	ENSPTRT00000041045	92	348	+
ENSPTRG00000013173	STK35	serine/threonine kinase 35 [Source:HGNC Symbol;Acc:HGNC:16254]	ENSPTRT00000024448	1261	1570	+
ENSPTRG00000033743	DDX47	Pan troglodytes DEAD (Asp-Glu-Ala-Asp) box polypeptide 47 (DDX47), mRNA. [Source:RefSeq mRNA;Acc:NM_001246548]	ENSPTRT00000066617	1509	1790	+
ENSPTRG00000014753	ACAA1	Acetyl-CoA acyltransferase 1; Uncharacterized protein [Source:UniProtKB/TrEMBL;Acc:H2QMA8]	ENSPTRT00000027593	1441	1808	+
ENSPTRG00000003465	ARL14EP	ADP-ribosylation factor-like 14 effector protein [Source:HGNC Symbol;Acc:HGNC:26798]	ENSPTRT00000006531	281	460	+
ENSPTRG00000022050	ATP7A	ATPase, Cu++ transporting, alpha polypeptide [Source:HGNC Symbol;Acc:HGNC:869]	ENSPTRT00000045244	4211	4496	+
ENSPTRG00000020808	MLLT3	myeloid/lymphoid or mixed-lineage leukemia (trithorax homolog, Drosophila); translocated to, 3 [Source:HGNC Symbol;Acc:HGNC:7136]	ENSPTRT00000038509	741	930	+
ENSPTRG00000008587	ANKFY1	Ankyrin repeat and FYVE domain containing 1; Uncharacterized protein [Source:UniProtKB/TrEMBL;Acc:H2R2R7]	ENSPTRT00000048468	6601	7083	+
ENSPTRG00000011605	ACP1	Acid phosphatase 1, soluble; Uncharacterized protein [Source:UniProtKB/TrEMBL;Acc:H2QHC9]	ENSPTRT00000021624	1191	1337	+
ENSPTRG00000012395	INSIG2	Insulin induced gene 2; Uncharacterized protein [Source:UniProtKB/TrEMBL;Acc:H2QIL8]	ENSPTRT00000023014	861	1030	+
ENSPTRG00000015850	ADD1	adducin 1 (alpha) [Source:HGNC Symbol;Acc:HGNC:243]	ENSPTRT00000029592	2831	2990	+
ENSPTRG00000009971	INO80C	INO80 complex subunit C [Source:HGNC Symbol;Acc:HGNC:26994]	ENSPTRT00000018302	731	910	+
ENSPTRG00000020809	FOCAD	focadhesin [Source:HGNC Symbol;Acc:HGNC:23377]	ENSPTRT00000038510	5581	5930	+
ENSPTRG00000002294	NUDT5	nudix (nucleoside diphosphate linked moiety X)-type motif 5 [Source:HGNC Symbol;Acc:HGNC:8052]	ENSPTRT00000004204	1081	1200	+
ENSPTRG00000014287	RTCB	RNA 2',3'-cyclic phosphate and 5'-OH ligase [Source:HGNC Symbol;Acc:HGNC:26935]	ENSPTRT00000026693	1561	1905	+
ENSPTRG00000009972	GALNT1	UDP-N-acetyl-alpha-D-galactosamine:polypeptide N-acetylgalactosaminyltransferase 1 (GalNAc-T1); Uncharacterized protein [Source:UniProtKB/TrEMBL;Acc:H2QEF9]	ENSPTRT00000018303	2158	2388	+
ENSPTRG00000019247	TPST1	Pan troglodytes tyrosylprotein sulfotransferase 1 (TPST1), mRNA. [Source:RefSeq mRNA;Acc:NM_001246467]	ENSPTRT00000035580	381	580	+
ENSPTRG00000019251	RABGEF1	RAB guanine nucleotide exchange factor (GEF) 1; Uncharacterized protein [Source:UniProtKB/TrEMBL;Acc:H2R595]	ENSPTRT00000055439	1344	1663	+
ENSPTRG00000013176	SNRPB	Small nuclear ribonucleoprotein-associated protein [Source:UniProtKB/TrEMBL;Acc:H2RDT2]	ENSPTRT00000067711	68	220	+
ENSPTRG00000002295	CDC123	Cell division cycle 123 homolog; Uncharacterized protein [Source:UniProtKB/TrEMBL;Acc:H2Q1M2]	ENSPTRT00000004205	1311	1486	+
ENSPTRG00000016771	ZFR	zinc finger RNA binding protein [Source:HGNC Symbol;Acc:HGNC:17277]	ENSPTRT00000031139	2941	3087	+
ENSPTRG00000019253	TMEM248	transmembrane protein 248 [Source:HGNC Symbol;Acc:HGNC:25476]	ENSPTRT00000035588	1151	1530	+
ENSPTRG00000019254	SBDS	Shwachman-Bodian-Diamond syndrome; Uncharacterized protein [Source:UniProtKB/TrEMBL;Acc:H2QUN6]	ENSPTRT00000035589	571	810	+
ENSPTRG00000040524	UBE2G1	Uncharacterized protein [Source:UniProtKB/TrEMBL;Acc:H2RIJ3]	ENSPTRT00000073431	351	460	+
ENSPTRG00000016770	MTMR12	Myotubularin related protein 12; Uncharacterized protein [Source:UniProtKB/TrEMBL;Acc:H2QQQ2]	ENSPTRT00000031137	1903	2480	+
ENSPTRG00000014754	MYD88	Pan troglodytes myeloid differentiation primary response gene (88) (MYD88), mRNA. [Source:RefSeq mRNA;Acc:NM_001130463]	ENSPTRT00000027596	1251	1600	+
ENSPTRG00000009975	SLC39A6	Solute carrier family 39 (Zinc transporter), member 6; Uncharacterized protein [Source:UniProtKB/TrEMBL;Acc:H2QEG0]	ENSPTRT00000018310	581	1030	+
ENSPTRG00000002296	CAMK1D	calcium/calmodulin-dependent protein kinase ID [Source:HGNC Symbol;Acc:HGNC:19341]	ENSPTRT00000004207	861	1020	+
ENSPTRG00000003478	EIF3M	Eukaryotic translation initiation factor 3 subunit M [Source:UniProtKB/TrEMBL;Acc:H2Q3D0]	ENSPTRT00000006554	1111	1231	+
ENSPTRG00000008593	MYBBP1A	MYB binding protein (P160) 1a [Source:HGNC Symbol;Acc:HGNC:7546]	ENSPTRT00000015858	3252	3700	+
ENSPTRG00000016768	GOLPH3	Golgi phosphoprotein 3 (Coat-protein); Uncharacterized protein [Source:UniProtKB/TrEMBL;Acc:H2QQQ1]	ENSPTRT00000031135	711	1230	+
ENSPTRG00000022060	BRWD3	bromodomain and WD repeat domain containing 3 [Source:HGNC Symbol;Acc:HGNC:17342]	ENSPTRT00000041076	5075	5301	+
ENSPTRG00000019259		Uncharacterized protein [Source:UniProtKB/TrEMBL;Acc:H2QUN7]	ENSPTRT00000035601	601	796	+
ENSPTRG00000013179	NOP56	Pan troglodytes NOP56 ribonucleoprotein homolog (yeast) (NOP56), mRNA. [Source:RefSeq mRNA;Acc:NM_001244674]	ENSPTRT00000024460	1731	1949	+
ENSPTRG00000014755	OXSR1	Oxidative-stress responsive 1; Uncharacterized protein [Source:UniProtKB/TrEMBL;Acc:H2QMA9]	ENSPTRT00000027597	2746	3014	+
ENSPTRG00000009977	ELP2	Elongation protein 2 homolog; Stat3-interacting protein; Uncharacterized protein [Source:UniProtKB/TrEMBL;Acc:G2HE55]	ENSPTRT00000044948	2221	2500	+
ENSPTRG00000000409			ENSPTRT00000000802	1101	1300	+
ENSPTRG00000005994	UBAC2	Pan troglodytes UBA domain containing 2 (UBAC2), mRNA. [Source:RefSeq mRNA;Acc:NM_001246491]	ENSPTRT00000011010	2461	2560	+
ENSPTRG00000019306	POM121C	POM121 transmembrane nucleoporin C [Source:HGNC Symbol;Acc:HGNC:34005]	ENSPTRT00000035614	3991	4210	+
ENSPTRG00000022061	SH3BGRL	Pan troglodytes SH3 domain binding glutamic acid-rich protein like (SH3BGRL), mRNA. [Source:RefSeq mRNA;Acc:NM_001246405]	ENSPTRT00000064886	811	990	+
ENSPTRG00000014290	FBXO7	F-box protein 7; Uncharacterized protein [Source:UniProtKB/TrEMBL;Acc:H2QLJ6]	ENSPTRT00000026695	381	670	+
ENSPTRG00000015852	NOP14	NOP14 nucleolar protein homolog; Uncharacterized protein [Source:UniProtKB/TrEMBL;Acc:H2QP47]	ENSPTRT00000029596	2781	2880	+
ENSPTRG00000000411	FGR	feline Gardner-Rasheed sarcoma viral oncogene homolog [Source:HGNC Symbol;Acc:HGNC:3697]	ENSPTRT00000000806	2301	2402	+
ENSPTRG00000022846	KLHL9	Uncharacterized protein [Source:UniProtKB/TrEMBL;Acc:H2R0C1]	ENSPTRT00000045154	1011	1390	+
ENSPTRG00000016763	C5orf22	chromosome 5 open reading frame 22 [Source:HGNC Symbol;Acc:HGNC:25639]	ENSPTRT00000031128	491	870	+
ENSPTRG00000005997	TM9SF2	Transmembrane 9 superfamily member 2; Uncharacterized protein [Source:UniProtKB/TrEMBL;Acc:H2Q7R2]	ENSPTRT00000011015	2171	2590	+
ENSPTRG00000004719	ATF7IP	activating transcription factor 7 interacting protein [Source:HGNC Symbol;Acc:HGNC:20092]	ENSPTRT00000008724	3771	3950	+
ENSPTRG00000007833	GDE1	Glycerophosphodiester phosphodiesterase 1; Uncharacterized protein [Source:UniProtKB/TrEMBL;Acc:H2QAN5]	ENSPTRT00000014437	861	1276	+
ENSPTRG00000016762	DROSHA	Drosha, ribonuclease type III; Uncharacterized protein [Source:UniProtKB/TrEMBL;Acc:H2R2D7]	ENSPTRT00000031125	3931	4235	+
ENSPTRG00000000413	IFI6	Pan troglodytes interferon, alpha-inducible protein 6 (IFI6), mRNA. [Source:RefSeq mRNA;Acc:NM_001009069]	ENSPTRT00000000808	539	822	+
ENSPTRG00000011614	RNASEH1	Ribonuclease H1; Uncharacterized protein [Source:UniProtKB/TrEMBL;Acc:H2QHD3]	ENSPTRT00000021649	731	1154	+
ENSPTRG00000019303		Uncharacterized protein [Source:UniProtKB/TrEMBL;Acc:H2QUR8]	ENSPTRT00000035701	741	870	+
ENSPTRG00000007834	CCP110	centriolar coiled coil protein 110kDa [Source:HGNC Symbol;Acc:HGNC:24342]	ENSPTRT00000014440	3311	3430	+
ENSPTRG00000020187	IDO1	indoleamine 2,3-dioxygenase 1 [Source:HGNC Symbol;Acc:HGNC:6059]	ENSPTRT00000037404	1596	1910	+
ENSPTRG00000004720	PLBD1	Phospholipase B domain containing 1; Uncharacterized protein [Source:UniProtKB/TrEMBL;Acc:H2Q5I2]	ENSPTRT00000008725	1731	1904	+
ENSPTRG00000015853	GRK4	G protein-coupled receptor kinase 4 [Source:HGNC Symbol;Acc:HGNC:4543]	ENSPTRT00000029600	87	370	+
ENSPTRG00000008598	PELP1	proline, glutamate and leucine rich protein 1 [Source:HGNC Symbol;Acc:HGNC:30134]	ENSPTRT00000015868	2784	3318	+
ENSPTRG00000011615	RPS7	Pan troglodytes ribosomal protein S7 (RPS7), mRNA. [Source:RefSeq mRNA;Acc:NM_001252001]	ENSPTRT00000021651	591	690	+
ENSPTRG00000020832	PLAA	Phospholipase A2-activating protein; Uncharacterized protein [Source:UniProtKB/TrEMBL;Acc:H2QX34]	ENSPTRT00000038541	2821	2983	+
ENSPTRG00000013182	CPXM1	carboxypeptidase X (M14 family), member 1 [Source:HGNC Symbol;Acc:HGNC:15771]	ENSPTRT00000024471	1971	2120	+
ENSPTRG00000007835	C16orf62	chromosome 16 open reading frame 62 [Source:HGNC Symbol;Acc:HGNC:24641]	ENSPTRT00000014442	2861	3050	+
ENSPTRG00000019298	WBSCR16	Uncharacterized protein; Williams-Beuren syndrome chromosome region 16 [Source:UniProtKB/TrEMBL;Acc:H2QUR9]	ENSPTRT00000035708	1951	2303	+
ENSPTRG00000003483	TCP11L1	T-complex 11-like 1; Uncharacterized protein [Source:UniProtKB/TrEMBL;Acc:H2Q3D5]	ENSPTRT00000006562	2001	2160	+
ENSPTRG00000000416	STX12	Syntaxin 12; Uncharacterized protein [Source:UniProtKB/TrEMBL;Acc:H2PYG1]	ENSPTRT00000000817	991	1150	+
ENSPTRG00000021972			ENSPTRT00000047850	821	1090	+
ENSPTRG00000013185	PCED1A	PC-esterase domain containing 1A [Source:HGNC Symbol;Acc:HGNC:16212]	ENSPTRT00000024477	1701	1940	+
ENSPTRG00000020193	GOLGA7	Golgi autoantigen, golgin subfamily a, 7; Uncharacterized protein [Source:UniProtKB/TrEMBL;Acc:H2QW28]	ENSPTRT00000037412	501	810	+
ENSPTRG00000014761	EXOG	Endo/exonuclease (5'-3'), endonuclease G-like; Uncharacterized protein [Source:UniProtKB/TrEMBL;Acc:H2QMB4]	ENSPTRT00000027604	800	1226	+
ENSPTRG00000013186	VPS16	vacuolar protein sorting 16 homolog (S. cerevisiae) [Source:HGNC Symbol;Acc:HGNC:14584]	ENSPTRT00000024487	2591	2720	+
ENSPTRG00000000417	PPP1R8	Protein phosphatase 1, regulatory (Inhibitor) subunit 8; Uncharacterized protein [Source:UniProtKB/TrEMBL;Acc:H2PYG2]	ENSPTRT00000000819	731	1130	+
ENSPTRG00000017656	IRF4	interferon regulatory factor 4 [Source:HGNC Symbol;Acc:HGNC:6119]	ENSPTRT00000032642	1617	1924	+
ENSPTRG00000004724	WBP11	Uncharacterized protein; WW domain binding protein 11 [Source:UniProtKB/TrEMBL;Acc:H2Q5I6]	ENSPTRT00000008729	351	460	+
ENSPTRG00000006118	HNRNPC	heterogeneous nuclear ribonucleoprotein C (C1/C2) [Source:RefSeq peptide;Acc:NP_001233371]	ENSPTRT00000044507	1261	1412	+
ENSPTRG00000022071	CHM	Choroideremia (Rab escort protein 1); Uncharacterized protein [Source:UniProtKB/TrEMBL;Acc:H2QYV2]	ENSPTRT00000041101	1901	2226	+
ENSPTRG00000019294	NCF1	neutrophil cytosolic factor 1 [Source:HGNC Symbol;Acc:HGNC:7660]	ENSPTRT00000035697	401	600	+
ENSPTRG00000000419	THEMIS2	thymocyte selection associated family member 2 [Source:HGNC Symbol;Acc:HGNC:16839]	ENSPTRT00000000822	1331	1590	+
ENSPTRG00000011622	TTC15	Tetratricopeptide repeat domain 15; Uncharacterized protein [Source:UniProtKB/TrEMBL;Acc:H2QHD9]	ENSPTRT00000021661	531	630	+
ENSPTRG00000017657	EXOC2	Exocyst complex component 2; Uncharacterized protein [Source:UniProtKB/TrEMBL;Acc:H2QS72]	ENSPTRT00000032644	3831	4076	+
ENSPTRG00000015854	HTT	huntingtin [Source:HGNC Symbol;Acc:HGNC:4851]	ENSPTRT00000029601	6791	7030	+
ENSPTRG00000003486	HIPK3	Homeodomain interacting protein kinase 3; Uncharacterized protein [Source:UniProtKB/TrEMBL;Acc:H2Q3D7]	ENSPTRT00000006565	3871	4040	+
ENSPTRG00000014296	HMGXB4	HMG box domain containing 4; Uncharacterized protein [Source:UniProtKB/TrEMBL;Acc:H2QLJ9]	ENSPTRT00000026708	1021	1170	+
ENSPTRG00000017093	CAST	calpastatin [Source:HGNC Symbol;Acc:HGNC:1515]	ENSPTRT00000031676	1791	1970	+
ENSPTRG00000019293	GTF2I	Uncharacterized protein [Source:UniProtKB/TrEMBL;Acc:H2QUR5]	ENSPTRT00000035694	3771	3960	+
ENSPTRG00000033879	PTPRA	Protein tyrosine phosphatase, receptor type, A; Uncharacterized protein [Source:UniProtKB/TrEMBL;Acc:H2RBP7]	ENSPTRT00000064519	521	700	+
ENSPTRG00000012410	RALB	v-ral simian leukemia viral oncogene homolog B [Source:HGNC Symbol;Acc:HGNC:9840]	ENSPTRT00000023036	321	510	+
ENSPTRG00000003487	KIAA1549L	KIAA1549-like [Source:HGNC Symbol;Acc:HGNC:24836]	ENSPTRT00000006566	3341	3480	+
ENSPTRG00000003489	CD59	CD59 molecule, complement regulatory protein; Uncharacterized protein [Source:UniProtKB/TrEMBL;Acc:H2Q3D9]	ENSPTRT00000006570	254	460	+
ENSPTRG00000004729	ARHGDIB	Rho GDP dissociation inhibitor (GDI) beta; Uncharacterized protein [Source:UniProtKB/TrEMBL;Acc:H2Q5I9]	ENSPTRT00000008734	10	230	+
ENSPTRG00000002309	FAM107B	family with sequence similarity 107, member B [Source:HGNC Symbol;Acc:HGNC:23726]	ENSPTRT00000004235	3181	3320	+
ENSPTRG00000000422	XKR8	Pan troglodytes XK, Kell blood group complex subunit-related family, member 8 (XKR8), mRNA. [Source:RefSeq mRNA;Acc:NM_001033037]	ENSPTRT00000000825	1731	1850	+
ENSPTRG00000011630	RNF144A	Ring finger protein 144A; Uncharacterized protein [Source:UniProtKB/TrEMBL;Acc:H2QHE3]	ENSPTRT00000021672	1481	1650	+
ENSPTRG00000014297	TOM1	target of myb1 (chicken) [Source:HGNC Symbol;Acc:HGNC:11982]	ENSPTRT00000026711	1711	1980	+
ENSPTRG00000012416	CLASP1	cytoplasmic linker associated protein 1 [Source:HGNC Symbol;Acc:HGNC:17088]	ENSPTRT00000023047	345	610	+
ENSPTRG00000011632	ID2	inhibitor of DNA binding 2, dominant negative helix-loop-helix protein [Source:HGNC Symbol;Acc:HGNC:5361]	ENSPTRT00000021674	291	480	+
ENSPTRG00000011633	KIDINS220	kinase D-interacting substrate, 220kDa [Source:HGNC Symbol;Acc:HGNC:29508]	ENSPTRT00000021679	4751	5480	+
ENSPTRG00000002311	HSPA14	Pan troglodytes heat shock 70kDa protein 14 (HSPA14), mRNA. [Source:RefSeq mRNA;Acc:NM_001246372]	ENSPTRT00000004238	291	400	+
ENSPTRG00000012419	MKI67IP	MKI67 (FHA domain) interacting nucleolar phosphoprotein; Uncharacterized protein [Source:UniProtKB/TrEMBL;Acc:H2QIN2]	ENSPTRT00000023053	781	959	+
ENSPTRG00000022082	DIAPH2	diaphanous-related formin 2 [Source:HGNC Symbol;Acc:HGNC:2877]	ENSPTRT00000047607	3391	3550	+
ENSPTRG00000015860	LRPAP1	Pan troglodytes low density lipoprotein receptor-related protein associated protein 1 (LRPAP1), mRNA. [Source:RefSeq mRNA;Acc:NM_001246391]	ENSPTRT00000029620	1181	1348	+
ENSPTRG00000020199	KAT6A	K(lysine) acetyltransferase 6A [Source:HGNC Symbol;Acc:HGNC:13013]	ENSPTRT00000037432	6501	6650	+
ENSPTRG00000012420	TSN	Translin; Uncharacterized protein [Source:UniProtKB/TrEMBL;Acc:H2QIN3]	ENSPTRT00000023054	1871	2100	+
ENSPTRG00000003491	LMO2	LIM domain only 2 (rhombotin-like 1) [Source:HGNC Symbol;Acc:HGNC:6642]	ENSPTRT00000006574	881	1070	+
ENSPTRG00000002313	SUV39H2	Uncharacterized protein [Source:UniProtKB/TrEMBL;Acc:H2QZV9]	ENSPTRT00000044828	861	1030	+
ENSPTRG00000003494	NAT10	N-acetyltransferase 10 (GCN5-related) [Source:HGNC Symbol;Acc:HGNC:29830]	ENSPTRT00000006581	261	390	+
ENSPTRG00000000426	DNAJC8	DnaJ (Hsp40) homolog, subfamily C, member 8; Uncharacterized protein [Source:UniProtKB/TrEMBL;Acc:H2PYG8]	ENSPTRT00000000834	481	670	+
ENSPTRG00000012422	GYPC	glycophorin C (Gerbich blood group) [Source:HGNC Symbol;Acc:HGNC:4704]	ENSPTRT00000044133	561	790	+
ENSPTRG00000013188	MRPS26	Mitochondrial ribosomal protein S26; Uncharacterized protein [Source:UniProtKB/TrEMBL;Acc:H2QJV0]	ENSPTRT00000024492	531	770	+
ENSPTRG00000017666	WRNIP1	Werner helicase interacting protein 1 [Source:HGNC Symbol;Acc:HGNC:20876]	ENSPTRT00000032656	1421	1580	+
ENSPTRG00000020200	AP3M2	Adaptor-related protein complex 3, mu 2 subunit; Uncharacterized protein [Source:UniProtKB/TrEMBL;Acc:H2QW32]	ENSPTRT00000037433	2341	2480	+
ENSPTRG00000012423	BIN1	bridging integrator 1 [Source:HGNC Symbol;Acc:HGNC:1052]	ENSPTRT00000023060	761	867	+
ENSPTRG00000003495	ABTB2	ankyrin repeat and BTB (POZ) domain containing 2 [Source:HGNC Symbol;Acc:HGNC:23842]	ENSPTRT00000006584	1	725	+
ENSPTRG00000002314	DCLRE1C	DNA cross-link repair 1C [Source:HGNC Symbol;Acc:HGNC:17642]	ENSPTRT00000004242	1721	1820	+
ENSPTRG00000013191	UBOX5	U-box domain containing 5; Uncharacterized protein [Source:UniProtKB/TrEMBL;Acc:H2QJV3]	ENSPTRT00000024499	2151	2270	+
ENSPTRG00000015867	LYAR	Ly1 antibody reactive [Source:HGNC Symbol;Acc:HGNC:26021]	ENSPTRT00000029628	711	950	+
ENSPTRG00000008611	MINK1	Misshapen-like kinase 1; Uncharacterized protein [Source:UniProtKB/TrEMBL;Acc:H2R152]	ENSPTRT00000050934	4761	4900	+
ENSPTRG00000017667	SERPINB1	Serpin peptidase inhibitor, clade B (Ovalbumin), member 1; Uncharacterized protein [Source:UniProtKB/TrEMBL;Acc:H2QS76]	ENSPTRT00000032658	1261	1421	+
ENSPTRG00000003496	CAT	Catalase [Source:UniProtKB/TrEMBL;Acc:H2Q3E5]	ENSPTRT00000006587	18	200	+
ENSPTRG00000000429	SESN2	sestrin 2 [Source:HGNC Symbol;Acc:HGNC:20746]	ENSPTRT00000000838	1441	1895	+
ENSPTRG00000013194	ITPA	Inosine triphosphate pyrophosphatase [Source:UniProtKB/TrEMBL;Acc:H2QJV6]	ENSPTRT00000024503	951	1111	+
ENSPTRG00000030718	PHACTR4	Phosphatase and actin regulator 4; Uncharacterized protein [Source:UniProtKB/TrEMBL;Acc:H2R9A5]	ENSPTRT00000059434	1081	1330	+
ENSPTRG00000006122	SUPT16H	Suppressor of Ty 16 homolog; Uncharacterized protein [Source:UniProtKB/TrEMBL;Acc:H2Q7Y1]	ENSPTRT00000011231	3241	3545	+
ENSPTRG00000017668	SERPINB9	Serpin peptidase inhibitor, clade B (Ovalbumin), member 9; Uncharacterized protein [Source:UniProtKB/TrEMBL;Acc:H2QS77]	ENSPTRT00000032659	841	1150	+
ENSPTRG00000020844	DDX58	DEAD (Asp-Glu-Ala-Asp) box polypeptide 58; Uncharacterized protein [Source:UniProtKB/TrEMBL;Acc:H2QX44]	ENSPTRT00000038562	2671	3007	+
ENSPTRG00000002320	FAM171A1	Uncharacterized protein [Source:UniProtKB/TrEMBL;Acc:H2R7T1]	ENSPTRT00000004256	2401	2820	+
ENSPTRG00000009989	EPG5	Ectopic P-granules autophagy protein 5 homolog; Uncharacterized protein [Source:UniProtKB/TrEMBL;Acc:H2R3Q4]	ENSPTRT00000046427	7851	7959	+
ENSPTRG00000017669	SERPINB6	serpin peptidase inhibitor, clade B (ovalbumin), member 6 [Source:HGNC Symbol;Acc:HGNC:8950]	ENSPTRT00000032661	521	720	+
ENSPTRG00000017670	NQO2	NAD(P)H dehydrogenase, quinone 2; Uncharacterized protein [Source:UniProtKB/TrEMBL;Acc:H2R2Y9]	ENSPTRT00000032662	918	1130	+
ENSPTRG00000006009	TPP2	tripeptidyl peptidase II [Source:HGNC Symbol;Acc:HGNC:12016]	ENSPTRT00000011037	3751	4018	+
ENSPTRG00000014299	MCM5	Minichromosome maintenance complex component 5; Uncharacterized protein [Source:UniProtKB/TrEMBL;Acc:H2QLK2]	ENSPTRT00000026715	2427	2540	+
ENSPTRG00000000432	RCC1	regulator of chromosome condensation [Source:RefSeq peptide;Acc:NP_001192134]	ENSPTRT00000000842	2021	2210	+
ENSPTRG00000017672	RIPK1	Receptor (TNFRSF)-interacting serine-threonine kinase 1; Uncharacterized protein [Source:UniProtKB/TrEMBL;Acc:H2QS79]	ENSPTRT00000032665	1321	1500	+
ENSPTRG00000006818	CYFIP1	Cytoplasmic FMR1 interacting protein 1; Uncharacterized protein [Source:UniProtKB/TrEMBL;Acc:H2Q913]	ENSPTRT00000012584	1541	1710	+
ENSPTRG00000014765	WDR48	Uncharacterized protein; WD repeat domain 48 [Source:UniProtKB/TrEMBL;Acc:H2QMB7]	ENSPTRT00000027610	3841	3955	+
ENSPTRG00000003498	EHF	Pan troglodytes ets homologous factor (EHF), mRNA. [Source:RefSeq mRNA;Acc:NM_001081568]	ENSPTRT00000006591	4344	4625	+
ENSPTRG00000020202	IKBKB	Uncharacterized protein [Source:UniProtKB/TrEMBL;Acc:H2QW34]	ENSPTRT00000037438	2291	2400	+
ENSPTRG00000011638	CPSF3	Pan troglodytes cleavage and polyadenylation specific factor 3, 73kDa (CPSF3), mRNA. [Source:RefSeq mRNA;Acc:NM_001246367]	ENSPTRT00000021694	2041	2240	+
ENSPTRG00000009990	PSTPIP2	proline-serine-threonine phosphatase interacting protein 2 [Source:HGNC Symbol;Acc:HGNC:9581]	ENSPTRT00000018341	301	670	+
ENSPTRG00000017673	BPHL	Biphenyl hydrolase-like (Serine hydrolase); Uncharacterized protein [Source:UniProtKB/TrEMBL;Acc:H2QS80]	ENSPTRT00000032667	961	1130	+
ENSPTRG00000006124	CHD8	Uncharacterized protein [Source:UniProtKB/TrEMBL;Acc:H2Q7Y2]	ENSPTRT00000067511	7553	8040	+
ENSPTRG00000000434	TRNAU1AP	tRNA selenocysteine 1 associated protein 1 [Source:HGNC Symbol;Acc:HGNC:30813]	ENSPTRT00000000845	621	760	+
ENSPTRG00000015875	EVC2	Ellis van Creveld syndrome 2; Uncharacterized protein [Source:UniProtKB/TrEMBL;Acc:H2QP60]	ENSPTRT00000029639	3781	4030	+
ENSPTRG00000017675	TUBB2A	tubulin, beta 2A class IIa [Source:HGNC Symbol;Acc:HGNC:12412]	ENSPTRT00000032668	1131	1364	+
ENSPTRG00000027750	TUBB2B	tubulin, beta 2B class IIb [Source:HGNC Symbol;Acc:HGNC:30829]	ENSPTRT00000032669	1411	1640	+
ENSPTRG00000020848			ENSPTRT00000038567	5241	5399	+
ENSPTRG00000002322	FAM188A	family with sequence similarity 188, member A [Source:HGNC Symbol;Acc:HGNC:23578]	ENSPTRT00000004259	1521	1620	+
ENSPTRG00000020850	APTX	aprataxin [Source:HGNC Symbol;Acc:HGNC:15984]	ENSPTRT00000038570	279	590	+
ENSPTRG00000009991	ATP5A1	Pan troglodytes ATP synthase, H+ transporting, mitochondrial F1 complex, alpha subunit 1, cardiac muscle (ATP5A1), nuclear gene encoding mitochondrial protein, mRNA. [Source:RefSeq mRNA;Acc:NM_001135736]	ENSPTRT00000018343	1721	1888	+
ENSPTRG00000000438	GMEB1	Glucocorticoid modulatory element binding protein 1; Uncharacterized protein [Source:UniProtKB/TrEMBL;Acc:H2PYH6]	ENSPTRT00000000850	1721	1939	+
ENSPTRG00000017096	ERAP2	Endoplasmic reticulum aminopeptidase 2; Uncharacterized protein [Source:UniProtKB/TrEMBL;Acc:H2QR95]	ENSPTRT00000031684	5001	5120	+
ENSPTRG00000006014	TEX30	testis expressed 30 [Source:HGNC Symbol;Acc:HGNC:25188]	ENSPTRT00000011043	711	902	+
ENSPTRG00000000439	YTHDF2	YTH domain family, member 2 [Source:HGNC Symbol;Acc:HGNC:31675]	ENSPTRT00000000851	2271	2450	+
ENSPTRG00000004735	DERA	Deoxyribose-phosphate aldolase (Putative); Uncharacterized protein [Source:UniProtKB/TrEMBL;Acc:H2Q5J5]	ENSPTRT00000008746	1208	1604	+
ENSPTRG00000019290	CLIP2	CAP-GLY domain containing linker protein 2; Uncharacterized protein [Source:UniProtKB/TrEMBL;Acc:H2QUR3]	ENSPTRT00000035687	3451	3740	+
ENSPTRG00000008614	SLC25A11	Solute carrier family 25 (Mitochondrial carrier oxoglutarate carrier), member 11; Uncharacterized protein [Source:UniProtKB/TrEMBL;Acc:H2QBZ1]	ENSPTRT00000015889	1481	1649	+
ENSPTRG00000014766	GORASP1	Golgi reassembly stacking protein 1, 65kDa; Uncharacterized protein [Source:UniProtKB/TrEMBL;Acc:H2QMB8]	ENSPTRT00000027612	1976	2305	+
ENSPTRG00000011639	IAH1	Isoamyl acetate-hydrolyzing esterase 1 homolog; Uncharacterized protein [Source:UniProtKB/TrEMBL;Acc:H2QHF0]	ENSPTRT00000021696	771	872	+
ENSPTRG00000002323	PTER	Phosphotriesterase related; Uncharacterized protein [Source:UniProtKB/TrEMBL;Acc:H2Q1N9]	ENSPTRT00000004261	139	510	+
ENSPTRG00000000442	EPB41	erythrocyte membrane protein band 4.1 [Source:HGNC Symbol;Acc:HGNC:3377]	ENSPTRT00000044855	2771	2870	+
ENSPTRG00000019289	RFC2	Replication factor C (Activator 1) 2, 40kDa; Uncharacterized protein [Source:UniProtKB/TrEMBL;Acc:H2QUR2]	ENSPTRT00000035683	1041	1280	+
ENSPTRG00000020852	DNAJA1	Pan troglodytes DnaJ (Hsp40) homolog, subfamily A, member 1 (DNAJA1), mRNA. [Source:RefSeq mRNA;Acc:NM_001246534]	ENSPTRT00000038574	1174	1496	+
ENSPTRG00000003501	CD44	CD44 molecule (Indian blood group) [Source:HGNC Symbol;Acc:HGNC:1681]	ENSPTRT00000006594	2571	2730	+
ENSPTRG00000006017	BIVM-ERCC5	BIVM-ERCC5 readthrough [Source:HGNC Symbol;Acc:HGNC:43690]	ENSPTRT00000060081	4971	5122	+
ENSPTRG00000011640	ADAM17	ADAM metallopeptidase domain 17 [Source:HGNC Symbol;Acc:HGNC:195]	ENSPTRT00000021697	2376	2866	+
ENSPTRG00000017097	LNPEP	Uncharacterized protein [Source:UniProtKB/TrEMBL;Acc:H2R5H3]	ENSPTRT00000031686	121	850	+
ENSPTRG00000022090	CSTF2	Uncharacterized protein [Source:UniProtKB/TrEMBL;Acc:H2QYW2]	ENSPTRT00000041140	1261	1560	+
ENSPTRG00000006820	NIPA1	non imprinted in Prader-Willi/Angelman syndrome 1 [Source:HGNC Symbol;Acc:HGNC:17043]	ENSPTRT00000012588	5871	6121	+
ENSPTRG00000019288	LAT2	linker for activation of T cells family, member 2 [Source:HGNC Symbol;Acc:HGNC:12749]	ENSPTRT00000035679	1161	1629	+
ENSPTRG00000038654	DCUN1D3	DCN1-like protein [Source:UniProtKB/TrEMBL;Acc:H2QAP8]	ENSPTRT00000014469	741	1252	+
ENSPTRG00000017100	RIOK2	RIO kinase 2; Uncharacterized protein [Source:UniProtKB/TrEMBL;Acc:H2QR97]	ENSPTRT00000031690	1001	1400	+
ENSPTRG00000012427	MAP3K2	Mitogen-activated protein kinase kinase kinase 2; Uncharacterized protein [Source:UniProtKB/TrEMBL;Acc:H2QIN7]	ENSPTRT00000023073	3501	3730	+
ENSPTRG00000020853	SMU1	Smu-1 suppressor of mec-8 and unc-52 homolog; Uncharacterized protein [Source:UniProtKB/TrEMBL;Acc:H2QX48]	ENSPTRT00000038576	1571	1713	+
ENSPTRG00000008615	RNF167	Ring finger protein 167; Uncharacterized protein [Source:UniProtKB/TrEMBL;Acc:H2QBZ2]	ENSPTRT00000015890	1531	1670	+
ENSPTRG00000020205	VDAC3	Uncharacterized protein [Source:UniProtKB/TrEMBL;Acc:H2R9U3]	ENSPTRT00000037444	911	1190	+
ENSPTRG00000006826	SNRPN	Pan troglodytes SNRPN upstream reading frame (SNURF), mRNA. [Source:RefSeq mRNA;Acc:NM_001256797]	ENSPTRT00000012599	811	945	+
ENSPTRG00000017103	CHD1	Chromodomain helicase DNA binding protein 1; Uncharacterized protein [Source:UniProtKB/TrEMBL;Acc:H2QR99]	ENSPTRT00000031693	5551	5833	+
ENSPTRG00000006126	TOX4	TOX high mobility group box family member 4 [Source:HGNC Symbol;Acc:HGNC:20161]	ENSPTRT00000011236	2171	2360	+
ENSPTRG00000017683	PRPF4B	PRP4 pre-mRNA processing factor 4 homolog B; Uncharacterized protein [Source:UniProtKB/TrEMBL;Acc:H2R7N8]	ENSPTRT00000050921	2911	3256	+
ENSPTRG00000011641	YWHAQ	Tyrosine 3-monooxygenase/tryptophan 5-monooxygenase activation protein, theta polypeptide; Uncharacterized protein [Source:UniProtKB/TrEMBL;Acc:H2QHF1]	ENSPTRT00000021699	1111	1210	+
ENSPTRG00000014308	APOL2	Apolipoprotein L, 2; Uncharacterized protein [Source:UniProtKB/TrEMBL;Acc:H2QLK5]	ENSPTRT00000026734	751	940	+
ENSPTRG00000014309	MYH9	myosin, heavy chain 9, non-muscle [Source:HGNC Symbol;Acc:HGNC:7579]	ENSPTRT00000026738	4211	4400	+
ENSPTRG00000020854	B4GALT1	UDP-Gal:betaGlcNAc beta 1,4- galactosyltransferase, polypeptide 1 [Source:HGNC Symbol;Acc:HGNC:924]	ENSPTRT00000038577	4091	4190	+
ENSPTRG00000006127	METTL3	Pan troglodytes methyltransferase like 3 (METTL3), mRNA. [Source:RefSeq mRNA;Acc:NM_001246555]	ENSPTRT00000011237	515	840	+
ENSPTRG00000012429	IWS1	IWS1 homolog; Uncharacterized protein [Source:UniProtKB/TrEMBL;Acc:H2QIN9]	ENSPTRT00000023078	1311	1520	+
ENSPTRG00000019287	EIF4H	Uncharacterized protein [Source:UniProtKB/TrEMBL;Acc:H2QUQ9]	ENSPTRT00000035667	2291	2400	+
ENSPTRG00000011642	TAF1B	TATA box binding protein (TBP)-associated factor, RNA polymerase I, B, 63kDa; Uncharacterized protein [Source:UniProtKB/TrEMBL;Acc:H2QHF2]	ENSPTRT00000021700	1805	2133	+
ENSPTRG00000020856	BAG1	BCL2-associated athanogene [Source:HGNC Symbol;Acc:HGNC:937]	ENSPTRT00000038579	1	110	+
ENSPTRG00000006829	UBE3A	Ubiquitin protein ligase E3A; Uncharacterized protein [Source:UniProtKB/TrEMBL;Acc:H2Q918]	ENSPTRT00000012606	2521	2660	+
ENSPTRG00000003503	PAMR1	peptidase domain containing associated with muscle regeneration 1 [Source:HGNC Symbol;Acc:HGNC:24554]	ENSPTRT00000055624	2751	2910	+
ENSPTRG00000019286	LIMK1	LIM domain kinase 1; Uncharacterized protein [Source:UniProtKB/TrEMBL;Acc:H2QUQ8]	ENSPTRT00000035666	1971	2310	+
ENSPTRG00000006022	ARGLU1	Arginine and glutamate rich 1; Uncharacterized protein [Source:UniProtKB/TrEMBL;Acc:H2Q7S5]	ENSPTRT00000011056	841	1120	+
ENSPTRG00000017106	ST8SIA4	Pan troglodytes ST8 alpha-N-acetyl-neuraminide alpha-2,8-sialyltransferase 4 (ST8SIA4), mRNA. [Source:RefSeq mRNA;Acc:NM_001037302]	ENSPTRT00000031696	1221	1630	+
ENSPTRG00000017687	ECI2	enoyl-CoA delta isomerase 2 [Source:HGNC Symbol;Acc:HGNC:14601]	ENSPTRT00000032687	1191	1300	+
ENSPTRG00000006026	ABHD13	Abhydrolase domain containing 13; Uncharacterized protein [Source:UniProtKB/TrEMBL;Acc:H2Q7S6]	ENSPTRT00000011061	1001	1230	+
ENSPTRG00000014768	CSRNP1	cysteine-serine-rich nuclear protein 1 [Source:HGNC Symbol;Acc:HGNC:14300]	ENSPTRT00000027615	911	1335	+
ENSPTRG00000023129	CAMTA2	calmodulin binding transcription activator 2 [Source:HGNC Symbol;Acc:HGNC:18807]	ENSPTRT00000042902	2441	2670	+
ENSPTRG00000009993	C18orf25	chromosome 18 open reading frame 25 [Source:HGNC Symbol;Acc:HGNC:28172]	ENSPTRT00000018346	5141	5250	+
ENSPTRG00000007855	TMEM159	Transmembrane protein 159; Uncharacterized protein [Source:UniProtKB/TrEMBL;Acc:H2QAQ1]	ENSPTRT00000072620	931	1110	+
ENSPTRG00000003504	TRIM44	Tripartite motif containing 44; Uncharacterized protein [Source:UniProtKB/TrEMBL;Acc:H2Q3F0]	ENSPTRT00000006601	1921	2042	+
ENSPTRG00000006143	ABHD4	Abhydrolase domain containing 4; Uncharacterized protein [Source:UniProtKB/TrEMBL;Acc:H2Q7Z0]	ENSPTRT00000011254	291	460	+
ENSPTRG00000014772	SLC25A38	Solute carrier family 25, member 38; Uncharacterized protein [Source:UniProtKB/TrEMBL;Acc:H2QMC1]	ENSPTRT00000027621	1201	1520	+
ENSPTRG00000020212	RNF170	ring finger protein 170 [Source:HGNC Symbol;Acc:HGNC:25358]	ENSPTRT00000037457	3661	3810	+
ENSPTRG00000006145	OXA1L	oxidase (cytochrome c) assembly 1-like [Source:HGNC Symbol;Acc:HGNC:8526]	ENSPTRT00000011256	1351	1665	+
ENSPTRG00000020858	NFX1	Nuclear transcription factor, X-box binding 1; Uncharacterized protein [Source:UniProtKB/TrEMBL;Acc:H2R0P2]	ENSPTRT00000050486	3371	3540	+
ENSPTRG00000030356	ATP10A	ATPase, class V, type 10A [Source:HGNC Symbol;Acc:HGNC:13542]	ENSPTRT00000018577	4521	4693	+
ENSPTRG00000000445	SRSF4	Serine/arginine-rich splicing factor 4; Uncharacterized protein [Source:UniProtKB/TrEMBL;Acc:H2PYI1]	ENSPTRT00000000865	1451	1580	+
ENSPTRG00000020213	HOOK3	Hook homolog 3; Uncharacterized protein [Source:UniProtKB/TrEMBL;Acc:H2QW41]	ENSPTRT00000037459	7131	7250	+
ENSPTRG00000004747	AEBP2	AE binding protein 2 [Source:HGNC Symbol;Acc:HGNC:24051]	ENSPTRT00000008773	213	735	+
ENSPTRG00000008620	KIF1C	Uncharacterized protein [Source:UniProtKB/TrEMBL;Acc:H2R1V5]	ENSPTRT00000048539	3701	3894	+
ENSPTRG00000017110	PAM	Uncharacterized protein [Source:UniProtKB/TrEMBL;Acc:H2R5G8]	ENSPTRT00000055601	2771	2980	+
ENSPTRG00000017688	CDYL	chromodomain protein, Y-like [Source:HGNC Symbol;Acc:HGNC:1811]	ENSPTRT00000032691	1841	2119	+
ENSPTRG00000013204	C20orf27	chromosome 20 open reading frame 27 [Source:HGNC Symbol;Acc:HGNC:15873]	ENSPTRT00000062384	991	1150	+
ENSPTRG00000003510	TRAF6	TNF receptor-associated factor 6; Uncharacterized protein [Source:UniProtKB/TrEMBL;Acc:H2Q3F3]	ENSPTRT00000006610	1121	1920	+
ENSPTRG00000009998	PIAS2	protein inhibitor of activated STAT, 2 [Source:HGNC Symbol;Acc:HGNC:17311]	ENSPTRT00000018355	1741	1860	+
ENSPTRG00000008621	SLC52A1	solute carrier family 52 (riboflavin transporter), member 1 [Source:HGNC Symbol;Acc:HGNC:30225]	ENSPTRT00000015899	2041	2295	+
ENSPTRG00000023056	METTL9	Methyltransferase like 9; Uncharacterized protein [Source:UniProtKB/TrEMBL;Acc:H2R0J0]	ENSPTRT00000046626	1231	1578	+
ENSPTRG00000015890	KIAA0232	KIAA0232; Uncharacterized protein [Source:UniProtKB/TrEMBL;Acc:H2QP67]	ENSPTRT00000029665	2851	3120	+
ENSPTRG00000011650	ODC1	ornithine decarboxylase 1 [Source:HGNC Symbol;Acc:HGNC:8109]	ENSPTRT00000021713	741	920	+
ENSPTRG00000013206	CDC25B	cell division cycle 25B [Source:HGNC Symbol;Acc:HGNC:1726]	ENSPTRT00000043034	3401	3660	+
ENSPTRG00000015892	TBC1D14	TBC1 domain family, member 14; Uncharacterized protein [Source:UniProtKB/TrEMBL;Acc:H2QP68]	ENSPTRT00000029667	3901	4000	+
ENSPTRG00000014776	EIF1B	Eukaryotic translation initiation factor 1B; Uncharacterized protein [Source:UniProtKB/TrEMBL;Acc:H2QMC4]	ENSPTRT00000027626	651	826	+
ENSPTRG00000020861	NOL6	Nucleolar protein family 6 (RNA-associated); Uncharacterized protein [Source:UniProtKB/TrEMBL;Acc:H2QX54]	ENSPTRT00000038592	3385	3696	+
ENSPTRG00000017692	FARS2	Pan troglodytes phenylalanyl-tRNA synthetase 2, mitochondrial (FARS2), nuclear gene encoding mitochondrial protein, mRNA. [Source:RefSeq mRNA;Acc:NM_001246463]	ENSPTRT00000032696	585	940	+
ENSPTRG00000010001	HDHD2	Haloacid dehalogenase-like hydrolase domain containing 2; Uncharacterized protein [Source:UniProtKB/TrEMBL;Acc:H2R6Q8]	ENSPTRT00000056624	1151	1330	+
ENSPTRG00000012435	WDR33	Uncharacterized protein; WD repeat domain 33 [Source:UniProtKB/TrEMBL;Acc:H2QIP3]	ENSPTRT00000023092	4041	4370	+
ENSPTRG00000017112	PPIP5K2	Diphosphoinositol pentakisphosphate kinase 2; Uncharacterized protein [Source:UniProtKB/TrEMBL;Acc:H2QRA2]	ENSPTRT00000031708	4011	4199	+
ENSPTRG00000020217	HGSNAT	Heparan-alpha-glucosaminide N-acetyltransferase; Uncharacterized protein [Source:UniProtKB/TrEMBL;Acc:H2QW44]	ENSPTRT00000037468	3651	3890	+
ENSPTRG00000006835	HERC2	HECT and RLD domain containing E3 ubiquitin protein ligase 2 [Source:HGNC Symbol;Acc:HGNC:4868]	ENSPTRT00000012625	13801	13990	+
ENSPTRG00000006147	MRPL52	mitochondrial ribosomal protein L52 [Source:HGNC Symbol;Acc:HGNC:16655]	ENSPTRT00000011264	281	397	+
ENSPTRG00000006030	IRS2	insulin receptor substrate 2 [Source:HGNC Symbol;Acc:HGNC:6126]	ENSPTRT00000011069	3911	4100	+
ENSPTRG00000003518	TTC17	Tetratricopeptide repeat domain 17; Uncharacterized protein [Source:UniProtKB/TrEMBL;Acc:H2Q3F9]	ENSPTRT00000006622	4001	4120	+
ENSPTRG00000010005	SMAD2	SMAD family member 2; Uncharacterized protein [Source:UniProtKB/TrEMBL;Acc:H2QEH9]	ENSPTRT00000018363	1631	1983	+
ENSPTRG00000012436	POLR2D	Pan troglodytes polymerase (RNA) II (DNA directed) polypeptide D (POLR2D), mRNA. [Source:RefSeq mRNA;Acc:NM_001251959]	ENSPTRT00000023093	1690	1911	+
ENSPTRG00000012437	AMMECR1L	AMME chromosomal region gene 1-like; Uncharacterized protein [Source:UniProtKB/TrEMBL;Acc:H2QIP5]	ENSPTRT00000023094	2471	2650	+
ENSPTRG00000014320	CSF2RB	colony stimulating factor 2 receptor, beta, low-affinity (granulocyte-macrophage) [Source:HGNC Symbol;Acc:HGNC:2436]	ENSPTRT00000026756	1811	2120	+
ENSPTRG00000006149	LRP10	low density lipoprotein receptor-related protein 10 [Source:HGNC Symbol;Acc:HGNC:14553]	ENSPTRT00000048448	921	1297	+
ENSPTRG00000003522	HSD17B12	Hydroxysteroid (17-beta) dehydrogenase 12; Uncharacterized protein [Source:UniProtKB/TrEMBL;Acc:H2Q3G0]	ENSPTRT00000006627	2321	2491	+
ENSPTRG00000017113	C5orf30	chromosome 5 open reading frame 30 [Source:HGNC Symbol;Acc:HGNC:25052]	ENSPTRT00000031709	471	1050	+
ENSPTRG00000008626	SCIMP	SLP adaptor and CSK interacting membrane protein [Source:HGNC Symbol;Acc:HGNC:33504]	ENSPTRT00000015912	381	520	+
ENSPTRG00000017697	RREB1	Ras responsive element binding protein 1; Uncharacterized protein [Source:UniProtKB/TrEMBL;Acc:H2R7N5]	ENSPTRT00000057702	8461	8560	+
ENSPTRG00000005191	DYRK2	Uncharacterized protein [Source:UniProtKB/TrEMBL;Acc:H2Q6F2]	ENSPTRT00000009535	2051	2330	+
ENSPTRG00000012438	SAP130	Sin3A-associated protein, 130kDa; Uncharacterized protein [Source:UniProtKB/TrEMBL;Acc:H2QIP6]	ENSPTRT00000023095	3281	3670	+
ENSPTRG00000010009	CTIF	CBP80/20-dependent translation initiation factor [Source:HGNC Symbol;Acc:HGNC:23925]	ENSPTRT00000018368	1371	1574	+
ENSPTRG00000005190	CAND1	Cullin-associated and neddylation-dissociated 1; Uncharacterized protein [Source:UniProtKB/TrEMBL;Acc:H2Q6F1]	ENSPTRT00000009533	4054	4271	+
ENSPTRG00000022103	TIMM8A	Translocase of inner mitochondrial membrane 8 homolog A; Uncharacterized protein [Source:UniProtKB/TrEMBL;Acc:H2QYW7]	ENSPTRT00000041170	581	750	+
ENSPTRG00000006151	RBM23	RNA binding motif protein 23 [Source:HGNC Symbol;Acc:HGNC:20155]	ENSPTRT00000044351	1551	2080	+
ENSPTRG00000008628	RABEP1	Rabaptin, RAB GTPase binding effector protein 1; Uncharacterized protein [Source:UniProtKB/TrEMBL;Acc:H2QC01]	ENSPTRT00000015914	3314	3530	+
ENSPTRG00000020229	PRKDC	protein kinase, DNA-activated, catalytic polypeptide [Source:HGNC Symbol;Acc:HGNC:9413]	ENSPTRT00000050339	12811	12940	+
ENSPTRG00000010010	SMAD7	SMAD family member 7; Uncharacterized protein [Source:UniProtKB/TrEMBL;Acc:H2QEI2]	ENSPTRT00000018370	551	680	+
ENSPTRG00000033952	SYNGR2	synaptogyrin 2 [Source:HGNC Symbol;Acc:HGNC:11499]	ENSPTRT00000066249	521	670	+
ENSPTRG00000006846	TJP1	Tight junction protein 1 (Zona occludens 1); Uncharacterized protein [Source:UniProtKB/TrEMBL;Acc:H2Q923]	ENSPTRT00000012641	4951	5050	+
ENSPTRG00000019278	ABHD11	Abhydrolase domain containing 11; Uncharacterized protein [Source:UniProtKB/TrEMBL;Acc:H2QUQ2]	ENSPTRT00000035647	1291	1459	+
ENSPTRG00000007871	UQCRC2	cytochrome b-c1 complex subunit 2, mitochondrial [Source:RefSeq peptide;Acc:NP_001233459]	ENSPTRT00000014499	2101	2272	+
ENSPTRG00000013211	PANK2	pantothenate kinase 2 [Source:HGNC Symbol;Acc:HGNC:15894]	ENSPTRT00000047902	1611	1883	+
ENSPTRG00000017698	SSR1	signal sequence receptor, alpha [Source:HGNC Symbol;Acc:HGNC:11323]	ENSPTRT00000032707	25	190	+
ENSPTRG00000000453	PUM1	Pumilio homolog 1; Uncharacterized protein [Source:UniProtKB/TrEMBL;Acc:H2PYI5]	ENSPTRT00000000885	4001	4187	+
ENSPTRG00000002333	STAM	Signal transducing adaptor molecule (SH3 domain and ITAM motif) 1; Uncharacterized protein [Source:UniProtKB/TrEMBL;Acc:H2Q1P5]	ENSPTRT00000004284	1891	2214	+
ENSPTRG00000022820	PJA2	Uncharacterized protein [Source:UniProtKB/TrEMBL;Acc:H2R373]	ENSPTRT00000046199	2091	2194	+
ENSPTRG00000011653	PDIA6	Pan troglodytes protein disulfide isomerase family A, member 6 (PDIA6), mRNA. [Source:RefSeq mRNA;Acc:NM_001246647]	ENSPTRT00000021718	1491	1782	+
ENSPTRG00000014333	CYTH4	cytohesin 4 [Source:HGNC Symbol;Acc:HGNC:9505]	ENSPTRT00000026783	2111	2340	+
ENSPTRG00000013212	RNF24	Ring finger protein 24; Uncharacterized protein [Source:UniProtKB/TrEMBL;Acc:H2QJW6]	ENSPTRT00000024554	411	890	+
ENSPTRG00000012439	UGGT1	UDP-glucose glycoprotein glucosyltransferase 1; Uncharacterized protein [Source:UniProtKB/TrEMBL;Acc:H2QIP7]	ENSPTRT00000023098	4493	4835	+
ENSPTRG00000017122	MAN2A1	Mannosidase, alpha, class 2A, member 1; Uncharacterized protein [Source:UniProtKB/TrEMBL;Acc:H2R5G6]	ENSPTRT00000031720	4311	4527	+
ENSPTRG00000020871	UBAP2	Ubiquitin associated protein 2; Uncharacterized protein [Source:UniProtKB/TrEMBL;Acc:H2R2C1]	ENSPTRT00000047885	3361	3470	+
ENSPTRG00000010142	MIER2	mesoderm induction early response 1, family member 2 [Source:HGNC Symbol;Acc:HGNC:29210]	ENSPTRT00000018604	1011	1160	+
ENSPTRG00000003527	ACCS	1-aminocyclopropane-1-carboxylate synthase homolog (Non-functional); Uncharacterized protein [Source:UniProtKB/TrEMBL;Acc:H2Q3G2]	ENSPTRT00000006636	1921	2139	+
ENSPTRG00000019276	WBSCR22	Williams Beuren syndrome chromosome region 22 [Source:HGNC Symbol;Acc:HGNC:16405]	ENSPTRT00000035643	21	180	+
ENSPTRG00000014789	TRAK1	trafficking protein, kinesin binding 1 [Source:HGNC Symbol;Acc:HGNC:29947]	ENSPTRT00000027649	3241	3430	+
ENSPTRG00000033700			ENSPTRT00000064862	331	585	+
ENSPTRG00000010012	RPL17	ribosomal protein L17 [Source:HGNC Symbol;Acc:HGNC:10307]	ENSPTRT00000018373	621	784	+
ENSPTRG00000022110	ARMCX2	Armadillo repeat containing, X-linked 2; Uncharacterized protein [Source:UniProtKB/TrEMBL;Acc:H2QYX2]	ENSPTRT00000041181	601	700	+
ENSPTRG00000003528	EXT2	exostosin glycosyltransferase 2 [Source:HGNC Symbol;Acc:HGNC:3513]	ENSPTRT00000006638	2471	2680	+
ENSPTRG00000006152	PRMT5	Protein arginine methyltransferase 5; Uncharacterized protein [Source:UniProtKB/TrEMBL;Acc:H2Q7Z6]	ENSPTRT00000011277	2161	2370	+
ENSPTRG00000008629	NUP88	Nucleoporin 88kDa; Uncharacterized protein [Source:UniProtKB/TrEMBL;Acc:H2QC02]	ENSPTRT00000015916	2241	2386	+
ENSPTRG00000013219	RASSF2	Ras association (RalGDS/AF-6) domain family member 2; Uncharacterized protein [Source:UniProtKB/TrEMBL;Acc:H2QJX0]	ENSPTRT00000024568	3841	4120	+
ENSPTRG00000017126	SLC25A46	Solute carrier family 25, member 46; Uncharacterized protein [Source:UniProtKB/TrEMBL;Acc:H2QRA8]	ENSPTRT00000031728	911	1270	+
ENSPTRG00000006842	APBA2	Uncharacterized protein [Source:UniProtKB/TrEMBL;Acc:H2Q920]	ENSPTRT00000012637	791	1060	+
ENSPTRG00000010155	BSG	basigin (Ok blood group) [Source:HGNC Symbol;Acc:HGNC:1116]	ENSPTRT00000018633	1681	1837	+
ENSPTRG00000012450	CCDC115	Coiled-coil domain containing 115; Uncharacterized protein [Source:UniProtKB/TrEMBL;Acc:H2QIQ1]	ENSPTRT00000023112	202	340	+
ENSPTRG00000010016	ACAA2	Acetyl-CoA acyltransferase 2; Uncharacterized protein [Source:UniProtKB/TrEMBL;Acc:H2QEI6]	ENSPTRT00000018379	1671	1920	+
ENSPTRG00000005186		Uncharacterized protein [Source:UniProtKB/TrEMBL;Acc:H2Q6E8]	ENSPTRT00000009527	781	1011	+
ENSPTRG00000017700	RIOK1	Serine/threonine-protein kinase RIO1 [Source:UniProtKB/TrEMBL;Acc:H2QS96]	ENSPTRT00000032710	1641	1905	+
ENSPTRG00000020230	MCM4	Minichromosome maintenance complex component 4; Uncharacterized protein [Source:UniProtKB/TrEMBL;Acc:H2QW49]	ENSPTRT00000037491	2111	2230	+
ENSPTRG00000008630	RPAIN	RPA interacting protein [Source:HGNC Symbol;Acc:HGNC:28641]	ENSPTRT00000059907	1421	1520	+
ENSPTRG00000014795	SEC22C	SEC22 vesicle trafficking protein homolog C; Uncharacterized protein [Source:UniProtKB/TrEMBL;Acc:H2QMD3]	ENSPTRT00000027658	991	1110	+
ENSPTRG00000019273	TBL2	Transducin (Beta)-like 2; Uncharacterized protein [Source:UniProtKB/TrEMBL;Acc:H2QUP7]	ENSPTRT00000035631	1311	1590	+
ENSPTRG00000017128	WDR36	WD repeat domain 36 [Source:HGNC Symbol;Acc:HGNC:30696]	ENSPTRT00000031731	2821	3000	+
ENSPTRG00000013220	SLC23A2	Solute carrier family 23 (Nucleobase transporters), member 2; Uncharacterized protein [Source:UniProtKB/TrEMBL;Acc:H2QJX1]	ENSPTRT00000024573	3291	3500	+
ENSPTRG00000003530	CD82	CD82 molecule; Uncharacterized protein [Source:UniProtKB/TrEMBL;Acc:H2Q3G5]	ENSPTRT00000006643	3	160	+
ENSPTRG00000012451	IMP4	IMP4, U3 small nucleolar ribonucleoprotein [Source:HGNC Symbol;Acc:HGNC:30856]	ENSPTRT00000023113	1331	1550	+
ENSPTRG00000000456	ZCCHC17	Uncharacterized protein; Zinc finger, CCHC domain containing 17 [Source:UniProtKB/TrEMBL;Acc:H2PYI8]	ENSPTRT00000000889	711	950	+
ENSPTRG00000041879	PDXP	pyridoxal (pyridoxine, vitamin B6) phosphatase [Source:HGNC Symbol;Acc:HGNC:30259]	ENSPTRT00000026803	817	1110	+
ENSPTRG00000015901	SH3TC1	SH3 domain and tetratricopeptide repeats 1 [Source:HGNC Symbol;Acc:HGNC:26009]	ENSPTRT00000029686	2299	2656	+
ENSPTRG00000019272	BCL7B	B-cell CLL/lymphoma 7B [Source:HGNC Symbol;Acc:HGNC:1005]	ENSPTRT00000035628	1066	1286	+
ENSPTRG00000006036	ING1	Inhibitor of growth family, member 1; Uncharacterized protein [Source:UniProtKB/TrEMBL;Acc:H2Q7T1]	ENSPTRT00000011090	1191	1330	+
ENSPTRG00000006038	ANKRD10	ankyrin repeat domain 10 [Source:HGNC Symbol;Acc:HGNC:20265]	ENSPTRT00000011092	2091	2209	+
ENSPTRG00000014797	NKTR	natural killer cell triggering receptor [Source:HGNC Symbol;Acc:HGNC:7833]	ENSPTRT00000027660	3081	3400	+
ENSPTRG00000013221	TMEM230	transmembrane protein 230 [Source:HGNC Symbol;Acc:HGNC:15876]	ENSPTRT00000024577	1401	1530	+
ENSPTRG00000005180	LEMD3	LEM domain containing 3; Uncharacterized protein [Source:UniProtKB/TrEMBL;Acc:H2Q6E6]	ENSPTRT00000009518	1411	1596	+
ENSPTRG00000019271	BAZ1B	Bromodomain adjacent to zinc finger domain, 1B; Uncharacterized protein [Source:UniProtKB/TrEMBL;Acc:H2QUP5]	ENSPTRT00000035623	4631	4825	+
ENSPTRG00000011661	E2F6	Pan troglodytes E2F transcription factor 6 (E2F6), mRNA. [Source:RefSeq mRNA;Acc:NM_001242344]	ENSPTRT00000021727	1328	1538	+
ENSPTRG00000003536	SLC35C1	Solute carrier family 35, member C1; Uncharacterized protein [Source:UniProtKB/TrEMBL;Acc:H2Q3G9]	ENSPTRT00000006653	1751	1980	+
ENSPTRG00000006153	HAUS4	HAUS augmin-like complex, subunit 4; Uncharacterized protein [Source:UniProtKB/TrEMBL;Acc:H2Q7Z7]	ENSPTRT00000011279	1461	1582	+
ENSPTRG00000013222	PCNA	Proliferating cell nuclear antigen [Source:UniProtKB/TrEMBL;Acc:H2QJX3]	ENSPTRT00000024578	81	190	+
ENSPTRG00000010157	POLRMT	polymerase (RNA) mitochondrial (DNA directed) [Source:HGNC Symbol;Acc:HGNC:9200]	ENSPTRT00000018637	2031	2320	+
ENSPTRG00000007877	EEF2K	Eukaryotic elongation factor-2 kinase; Uncharacterized protein [Source:UniProtKB/TrEMBL;Acc:H2QAR0]	ENSPTRT00000014508	2287	2600	+
ENSPTRG00000020872	DCAF12	DDB1 and CUL4 associated factor 12 [Source:HGNC Symbol;Acc:HGNC:19911]	ENSPTRT00000048312	1231	1440	+
ENSPTRG00000017129	CAMK4	calcium/calmodulin-dependent protein kinase IV [Source:HGNC Symbol;Acc:HGNC:1464]	ENSPTRT00000031732	1281	1774	+
ENSPTRG00000020873	UBAP1	ubiquitin associated protein 1 [Source:HGNC Symbol;Acc:HGNC:12461]	ENSPTRT00000050204	941	1270	+
ENSPTRG00000015916	WDR1	WD repeat domain 1 [Source:HGNC Symbol;Acc:HGNC:12754]	ENSPTRT00000029716	1701	1950	+
ENSPTRG00000010161	FSTL3	follistatin-like 3 (secreted glycoprotein) [Source:HGNC Symbol;Acc:HGNC:3973]	ENSPTRT00000018645	782	1160	+
ENSPTRG00000013223	CDS2	CDP-diacylglycerol synthase (phosphatidate cytidylyltransferase) 2 [Source:HGNC Symbol;Acc:HGNC:1801]	ENSPTRT00000059277	1065	1240	+
ENSPTRG00000007878	POLR3E	polymerase (RNA) III (DNA directed) polypeptide E (80kD) [Source:HGNC Symbol;Acc:HGNC:30347]	ENSPTRT00000014513	1674	2112	+
ENSPTRG00000006867	ARHGAP11A	Rho GTPase activating protein 11A; Uncharacterized protein [Source:UniProtKB/TrEMBL;Acc:H2Q931]	ENSPTRT00000012671	3551	3690	+
ENSPTRG00000008632	DHX33	Uncharacterized protein [Source:UniProtKB/TrEMBL;Acc:H2QC04]	ENSPTRT00000015919	2191	2500	+
ENSPTRG00000014352	EIF3L	Pan troglodytes eukaryotic translation initiation factor 3, subunit L (EIF3L), mRNA. [Source:RefSeq mRNA;Acc:NM_001135207]	ENSPTRT00000067693	171	320	+
ENSPTRG00000013228	GPCPD1	Glycerophosphocholine phosphodiesterase GDE1 homolog; Uncharacterized protein [Source:UniProtKB/TrEMBL;Acc:H2QJX5]	ENSPTRT00000024587	5331	5455	+
ENSPTRG00000020242	PCMTD1	Protein-L-isoaspartate (D-aspartate) O-methyltransferase domain containing 1; Uncharacterized protein [Source:UniProtKB/TrEMBL;Acc:H2QW55]	ENSPTRT00000037511	1041	1528	+
ENSPTRG00000007879	CDR2	Cerebellar degeneration-related protein 2, 62kDa; Uncharacterized protein [Source:UniProtKB/TrEMBL;Acc:H2QAR2]	ENSPTRT00000014515	1381	1530	+
ENSPTRG00000008634	DERL2	Der1-like domain family, member 2; Uncharacterized protein [Source:UniProtKB/TrEMBL;Acc:H2QC05]	ENSPTRT00000015923	668	988	+
ENSPTRG00000014354	MICALL1	Uncharacterized protein [Source:UniProtKB/TrEMBL;Acc:H2QLM8]	ENSPTRT00000026823	2201	2452	+
ENSPTRG00000017130	STARD4	StAR-related lipid transfer (START) domain containing 4; Uncharacterized protein [Source:UniProtKB/TrEMBL;Acc:H2QRB2]	ENSPTRT00000031733	1331	1430	+
ENSPTRG00000005176	GNS	Glucosamine (N-acetyl)-6-sulfatase; Uncharacterized protein [Source:UniProtKB/TrEMBL;Acc:H2Q6E4]	ENSPTRT00000009514	1908	2344	+
ENSPTRG00000014802		Uncharacterized protein [Source:UniProtKB/TrEMBL;Acc:H2QMD7]	ENSPTRT00000027670	901	1000	+
ENSPTRG00000003539	PEX16	peroxisomal biogenesis factor 16 [Source:HGNC Symbol;Acc:HGNC:8857]	ENSPTRT00000006656	1	160	+
ENSPTRG00000008637	NLRP1	NLR family, pyrin domain containing 1 [Source:HGNC Symbol;Acc:HGNC:14374]	ENSPTRT00000015929	4111	4320	+
ENSPTRG00000010021	MBD1	methyl-CpG binding domain protein 1 [Source:HGNC Symbol;Acc:HGNC:6916]	ENSPTRT00000018388	1871	2350	+
ENSPTRG00000002341	ARL5B	ADP-ribosylation factor-like 5B; Uncharacterized protein [Source:UniProtKB/TrEMBL;Acc:H2Q1P8]	ENSPTRT00000004302	761	985	+
ENSPTRG00000003542	PHF21A	Uncharacterized protein [Source:UniProtKB/TrEMBL;Acc:H2Q3H3]	ENSPTRT00000006663	1861	2040	+
ENSPTRG00000014809	SNRK	SNF related kinase; Uncharacterized protein [Source:UniProtKB/TrEMBL;Acc:H2QME0]	ENSPTRT00000027683	2351	2560	+
ENSPTRG00000013231	TRMT6	Uncharacterized protein; tRNA methyltransferase 6 homolog [Source:UniProtKB/TrEMBL;Acc:H2QJX7]	ENSPTRT00000024590	881	1120	+
ENSPTRG00000012460	FAM168B	family with sequence similarity 168, member B [Source:HGNC Symbol;Acc:HGNC:27016]	ENSPTRT00000023128	1762	1920	+
ENSPTRG00000039741			ENSPTRT00000075768	51	250	+
ENSPTRG00000000463	PEF1	Penta-EF-hand domain containing 1; Uncharacterized protein [Source:UniProtKB/TrEMBL;Acc:H2PYJ2]	ENSPTRT00000000899	1181	1530	+
ENSPTRG00000014359	PICK1	Protein interacting with PRKCA 1; Uncharacterized protein [Source:UniProtKB/TrEMBL;Acc:H2QLN1]	ENSPTRT00000026828	1161	1260	+
ENSPTRG00000023076	TYW1B	tRNA-yW synthesizing protein 1 homolog B (S. cerevisiae) [Source:HGNC Symbol;Acc:HGNC:33908]	ENSPTRT00000035590	2021	2470	+
ENSPTRG00000007885	COG7	Component of oligomeric golgi complex 7; Uncharacterized protein [Source:UniProtKB/TrEMBL;Acc:H2QAR7]	ENSPTRT00000014529	2301	2640	+
ENSPTRG00000005174	TBK1	TANK-binding kinase 1; Uncharacterized protein [Source:UniProtKB/TrEMBL;Acc:H2Q6E2]	ENSPTRT00000009511	1761	2029	+
ENSPTRG00000017708			ENSPTRT00000032719	1149	1360	+
ENSPTRG00000011665	LPIN1	lipin 1 [Source:HGNC Symbol;Acc:HGNC:13345]	ENSPTRT00000021740	2601	2960	+
ENSPTRG00000015919	HS3ST1	heparan sulfate (glucosamine) 3-O-sulfotransferase 1 [Source:HGNC Symbol;Acc:HGNC:5194]	ENSPTRT00000029720	2001	2100	+
ENSPTRG00000022897		Uncharacterized protein [Source:UniProtKB/TrEMBL;Acc:H2QW47]	ENSPTRT00000037475	2251	2465	+
ENSPTRG00000003545	DGKZ	diacylglycerol kinase, zeta [Source:HGNC Symbol;Acc:HGNC:2857]	ENSPTRT00000006670	3693	3946	+
ENSPTRG00000020246	RB1CC1	RB1-inducible coiled-coil 1; Uncharacterized protein [Source:UniProtKB/TrEMBL;Acc:H2QW57]	ENSPTRT00000037516	5511	5620	+
ENSPTRG00000007886	GGA2	golgi-associated, gamma adaptin ear containing, ARF binding protein 2 [Source:HGNC Symbol;Acc:HGNC:16064]	ENSPTRT00000014533	1672	1800	+
ENSPTRG00000017136	SRP19	Pan troglodytes signal recognition particle 19kDa (SRP19), mRNA. [Source:RefSeq mRNA;Acc:NM_001242420]	ENSPTRT00000031743	751	870	+
ENSPTRG00000015924	CPEB2	cytoplasmic polyadenylation element binding protein 2 [Source:HGNC Symbol;Acc:HGNC:21745]	ENSPTRT00000042116	2131	2512	+
ENSPTRG00000005173	XPOT	Exportin, tRNA (Nuclear export receptor for tRNAs); Uncharacterized protein [Source:UniProtKB/TrEMBL;Acc:H2R7H3]	ENSPTRT00000057507	1991	2250	+
ENSPTRG00000014812	ABHD5	Abhydrolase domain containing 5; Uncharacterized protein [Source:UniProtKB/TrEMBL;Acc:H2QME2]	ENSPTRT00000027689	1031	1130	+
ENSPTRG00000006159	ACIN1	apoptotic chromatin condensation inducer 1 [Source:HGNC Symbol;Acc:HGNC:17066]	ENSPTRT00000011290	4011	4250	+
ENSPTRG00000007888	UBFD1	ubiquitin family domain containing 1 [Source:HGNC Symbol;Acc:HGNC:30565]	ENSPTRT00000014539	1951	2140	+
ENSPTRG00000011666	TRIB2	Tribbles homolog 2; Uncharacterized protein [Source:UniProtKB/TrEMBL;Acc:H2QHG3]	ENSPTRT00000021741	2351	2700	+
ENSPTRG00000020885	SIGMAR1	Sigma non-opioid intracellular receptor 1; Uncharacterized protein [Source:UniProtKB/TrEMBL;Acc:H2QX68]	ENSPTRT00000038642	621	1010	+
ENSPTRG00000017140	MCC	mutated in colorectal cancers [Source:HGNC Symbol;Acc:HGNC:6935]	ENSPTRT00000048675	3011	3220	+
ENSPTRG00000039216	WBP5	Uncharacterized protein; WW domain binding protein 5 [Source:UniProtKB/TrEMBL;Acc:H2RH34]	ENSPTRT00000072257	321	500	+
ENSPTRG00000011668	NBAS	neuroblastoma amplified sequence [Source:HGNC Symbol;Acc:HGNC:15625]	ENSPTRT00000021745	7101	7263	+
ENSPTRG00000002346	MLLT10	myeloid/lymphoid or mixed-lineage leukemia (trithorax homolog, Drosophila); translocated to, 10 [Source:HGNC Symbol;Acc:HGNC:16063]	ENSPTRT00000004313	281	740	+
ENSPTRG00000012485	MGAT5	Mannosyl (Alpha-1,6-)-glycoprotein beta-1,6-N-acetyl-glucosaminyltransferase; Uncharacterized protein [Source:UniProtKB/TrEMBL;Acc:H2QIR3]	ENSPTRT00000023164	2221	2420	+
ENSPTRG00000028235	TCEAL3	transcription elongation factor A (SII)-like 3 [Source:HGNC Symbol;Acc:HGNC:28247]	ENSPTRT00000054939	265	380	+
ENSPTRG00000022131	MORF4L2	Pan troglodytes mortality factor 4 like 2 (MORF4L2), mRNA. [Source:RefSeq mRNA;Acc:NM_001098562]	ENSPTRT00000047653	542	1010	+
ENSPTRG00000013234	CRLS1	Cardiolipin synthase 1; Uncharacterized protein [Source:UniProtKB/TrEMBL;Acc:H2QJX9]	ENSPTRT00000024595	817	1083	+
ENSPTRG00000012486	TMEM163	transmembrane protein 163 [Source:HGNC Symbol;Acc:HGNC:25380]	ENSPTRT00000047743	131	330	+
ENSPTRG00000010022	CXXC1	CXXC finger protein 1; Uncharacterized protein [Source:UniProtKB/TrEMBL;Acc:H2QEJ0]	ENSPTRT00000018394	2751	2958	+
ENSPTRG00000020251	TCEA1	Transcription elongation factor A (SII), 1; Uncharacterized protein [Source:UniProtKB/TrEMBL;Acc:H2QW60]	ENSPTRT00000037527	1011	1150	+
ENSPTRG00000007891	DCTN5	dynactin subunit 5 [Source:RefSeq peptide;Acc:NP_001233429]	ENSPTRT00000014543	2901	3163	+
ENSPTRG00000008645	MED31	mediator complex subunit 31 [Source:HGNC Symbol;Acc:HGNC:24260]	ENSPTRT00000015946	351	619	+
ENSPTRG00000029431	MAFF	Uncharacterized protein; V-maf musculoaponeurotic fibrosarcoma oncogene homolog F (Avian) [Source:UniProtKB/TrEMBL;Acc:H2R6Z3]	ENSPTRT00000056869	471	640	+
ENSPTRG00000007892	PLK1	Polo-like kinase 1; Serine/threonine-protein kinase PLK1; Uncharacterized protein [Source:UniProtKB/TrEMBL;Acc:G2HFG8]	ENSPTRT00000014544	11	230	+
ENSPTRG00000017719	PAK1IP1	PAK1 interacting protein 1; Uncharacterized protein [Source:UniProtKB/TrEMBL;Acc:H2QSA5]	ENSPTRT00000032747	971	1230	+
ENSPTRG00000022822	TMEM184B	Pan troglodytes transmembrane protein 184B (TMEM184B), mRNA. [Source:RefSeq mRNA;Acc:NM_001251859]	ENSPTRT00000044746	1261	1960	+
ENSPTRG00000010168	MED16	mediator complex subunit 16 [Source:HGNC Symbol;Acc:HGNC:17556]	ENSPTRT00000050042	1601	1770	+
ENSPTRG00000017720	TMEM14C	Transmembrane protein 14C; Uncharacterized protein [Source:UniProtKB/TrEMBL;Acc:H2QSA6]	ENSPTRT00000032749	731	950	+
ENSPTRG00000024043	CCNT2	Cyclin T2; Uncharacterized protein [Source:UniProtKB/TrEMBL;Acc:H2R0N5]	ENSPTRT00000045615	2031	2220	+
ENSPTRG00000006877	KATNBL1	katanin p80 subunit B-like 1 [Source:HGNC Symbol;Acc:HGNC:26199]	ENSPTRT00000012690	1070	1461	+
ENSPTRG00000013240	TMX4	Pan troglodytes thioredoxin-related transmembrane protein 4 (TMX4), mRNA. [Source:RefSeq mRNA;Acc:NM_001246506]	ENSPTRT00000024608	5498	5721	+
ENSPTRG00000008649	XAF1	Uncharacterized protein; XIAP associated factor 1 [Source:UniProtKB/TrEMBL;Acc:H2QC14]	ENSPTRT00000015953	3341	3510	+
ENSPTRG00000006053	PCID2	PCI domain containing 2 [Source:HGNC Symbol;Acc:HGNC:25653]	ENSPTRT00000011119	1361	1600	+
ENSPTRG00000015927	FBXL5	F-box and leucine-rich repeat protein 5; Uncharacterized protein [Source:UniProtKB/TrEMBL;Acc:H2QP88]	ENSPTRT00000029732	1359	1995	+
ENSPTRG00000020253	MRPL15	Mitochondrial ribosomal protein L15; Uncharacterized protein [Source:UniProtKB/TrEMBL;Acc:H2QW61]	ENSPTRT00000037532	701	940	+
ENSPTRG00000002355	PIP4K2A	Uncharacterized protein [Source:UniProtKB/TrEMBL;Acc:H2Q1Q4]	ENSPTRT00000004323	1131	1390	+
ENSPTRG00000000467	PTP4A2	protein tyrosine phosphatase type IVA, member 2 [Source:HGNC Symbol;Acc:HGNC:9635]	ENSPTRT00000000915	921	1104	+
ENSPTRG00000019312	RHBDD2	Rhomboid domain containing 2; Uncharacterized protein [Source:UniProtKB/TrEMBL;Acc:H2QUS6]	ENSPTRT00000035734	1671	1800	+
ENSPTRG00000022138	FAM199X	family with sequence similarity 199, X-linked [Source:HGNC Symbol;Acc:HGNC:25195]	ENSPTRT00000041221	2601	2820	+
ENSPTRG00000003546	AMBRA1	autophagy/beclin-1 regulator 1 [Source:HGNC Symbol;Acc:HGNC:25990]	ENSPTRT00000006673	4771	4920	+
ENSPTRG00000014365	CSNK1E	Casein kinase 1, epsilon; Uncharacterized protein [Source:UniProtKB/TrEMBL;Acc:H2R0C8]	ENSPTRT00000046730	1861	2080	+
ENSPTRG00000017721	TMEM14B	transmembrane protein 14B [Source:HGNC Symbol;Acc:HGNC:21384]	ENSPTRT00000032750	851	950	+
ENSPTRG00000006878	EMC4	ER membrane protein complex subunit 4 [Source:HGNC Symbol;Acc:HGNC:28032]	ENSPTRT00000012692	681	990	+
ENSPTRG00000019313	POR	NADPH--cytochrome P450 reductase [Source:UniProtKB/TrEMBL;Acc:H2QUS7]	ENSPTRT00000035737	2071	2270	+
ENSPTRG00000014824	KIAA1143	KIAA1143 [Source:HGNC Symbol;Acc:HGNC:29198]	ENSPTRT00000027718	361	518	+
ENSPTRG00000012491	RAB3GAP1	Uncharacterized protein [Source:UniProtKB/TrEMBL;Acc:H2QIR5]	ENSPTRT00000023177	2681	3248	+
ENSPTRG00000006879	SLC12A6	Uncharacterized protein [Source:UniProtKB/TrEMBL;Acc:H2RC56]	ENSPTRT00000065236	3431	4036	+
ENSPTRG00000017146	PGGT1B	Protein geranylgeranyltransferase type I, beta subunit; Uncharacterized protein [Source:UniProtKB/TrEMBL;Acc:H2QRC3]	ENSPTRT00000031756	1051	1238	+
ENSPTRG00000020261	TMEM68	Transmembrane protein 68; Uncharacterized protein [Source:UniProtKB/TrEMBL;Acc:H2QW65]	ENSPTRT00000037540	148	312	+
ENSPTRG00000006165	HOMEZ	homeobox and leucine zipper encoding [Source:HGNC Symbol;Acc:HGNC:20164]	ENSPTRT00000011304	1571	1830	+
ENSPTRG00000034537	PPP1R3E	protein phosphatase 1, regulatory subunit 3E [Source:HGNC Symbol;Acc:HGNC:14943]	ENSPTRT00000066714	6	180	+
ENSPTRG00000020262	TGS1	trimethylguanosine synthase 1 [Source:HGNC Symbol;Acc:HGNC:17843]	ENSPTRT00000037542	881	1020	+
ENSPTRG00000006167	BCL2L2	BCL2-like 2 [Source:HGNC Symbol;Acc:HGNC:995]	ENSPTRT00000011308	3221	3390	+
ENSPTRG00000007895	PRKCB	protein kinase C, beta [Source:HGNC Symbol;Acc:HGNC:9395]	ENSPTRT00000014548	901	1110	+
ENSPTRG00000000470	TMEM39B	Transmembrane protein 39B; Uncharacterized protein [Source:UniProtKB/TrEMBL;Acc:H2R1T0]	ENSPTRT00000044784	1451	1640	+
ENSPTRG00000006168	PABPN1	poly(A) binding protein, nuclear 1 [Source:HGNC Symbol;Acc:HGNC:8565]	ENSPTRT00000011309	2141	2380	+
ENSPTRG00000010173	ARID3A	AT rich interactive domain 3A (BRIGHT-like) [Source:HGNC Symbol;Acc:HGNC:3031]	ENSPTRT00000013436	11	200	+
ENSPTRG00000005164	MON2	MON2 homolog; Uncharacterized protein [Source:UniProtKB/TrEMBL;Acc:H2RDJ5]	ENSPTRT00000067397	5501	5923	+
ENSPTRG00000010026	ME2	Malic enzyme [Source:UniProtKB/TrEMBL;Acc:H2QEJ4]	ENSPTRT00000018401	151	370	+
ENSPTRG00000010176	TMEM259	transmembrane protein 259 [Source:HGNC Symbol;Acc:HGNC:17039]	ENSPTRT00000044327	1	170	+
ENSPTRG00000020900	VCP	Uncharacterized protein; Valosin containing protein [Source:UniProtKB/TrEMBL;Acc:H2QX75]	ENSPTRT00000038667	3181	3420	+
ENSPTRG00000007897	RBBP6	Uncharacterized protein [Source:UniProtKB/TrEMBL;Acc:H2QAS9]	ENSPTRT00000014551	5361	5478	+
ENSPTRG00000010180	HMHA1	histocompatibility (minor) HA-1 [Source:HGNC Symbol;Acc:HGNC:17102]	ENSPTRT00000018693	3161	3390	+
ENSPTRG00000017150	FEM1C	Fem-1 homolog c; Uncharacterized protein [Source:UniProtKB/TrEMBL;Acc:H2QRC5]	ENSPTRT00000031760	2291	2480	+
ENSPTRG00000000471	KPNA6	Importin subunit alpha [Source:UniProtKB/TrEMBL;Acc:H2PYJ7]	ENSPTRT00000000924	1681	2060	+
ENSPTRG00000020263	LYN	Uncharacterized protein; V-yes-1 Yamaguchi sarcoma viral related oncogene homolog [Source:UniProtKB/TrEMBL;Acc:H2R453]	ENSPTRT00000044800	1951	2241	+
ENSPTRG00000017152	TMED7	Pan troglodytes transmembrane emp24 protein transport domain containing 7 (TMED7), mRNA. [Source:RefSeq mRNA;Acc:NM_001204309]	ENSPTRT00000031761	506	780	+
ENSPTRG00000014369	DDX17	Uncharacterized protein [Source:UniProtKB/TrEMBL;Acc:H2R7C9]	ENSPTRT00000057338	4511	4780	+
ENSPTRG00000007898	TNRC6A	trinucleotide repeat containing 6A [Source:HGNC Symbol;Acc:HGNC:11969]	ENSPTRT00000044206	1921	2300	+
ENSPTRG00000010028	SMAD4	SMAD family member 4; Uncharacterized protein [Source:UniProtKB/TrEMBL;Acc:H2QEJ6]	ENSPTRT00000018403	1861	2110	+
ENSPTRG00000006054	CUL4A	Cullin 4A; Uncharacterized protein [Source:UniProtKB/TrEMBL;Acc:H2Q7U2]	ENSPTRT00000011124	2160	2536	+
ENSPTRG00000014829	ZDHHC3	Uncharacterized protein; Zinc finger, DHHC-type containing 3 [Source:UniProtKB/TrEMBL;Acc:H2QMF4]	ENSPTRT00000027724	1251	1419	+
ENSPTRG00000017154	ATG12	Pan troglodytes ATG12 autophagy related 12 homolog (ATG12), mRNA. [Source:RefSeq mRNA;Acc:NM_001251998]	ENSPTRT00000055583	631	780	+
ENSPTRG00000000472	TXLNA	taxilin alpha [Source:HGNC Symbol;Acc:HGNC:30685]	ENSPTRT00000000926	1311	1450	+
ENSPTRG00000017729	HIVEP1	human immunodeficiency virus type I enhancer binding protein 1 [Source:HGNC Symbol;Acc:HGNC:4920]	ENSPTRT00000057670	8111	8268	+
ENSPTRG00000003550	ARHGAP1	Rho GTPase activating protein 1; Uncharacterized protein [Source:UniProtKB/TrEMBL;Acc:H2Q3I0]	ENSPTRT00000006681	1661	1860	+
ENSPTRG00000007900	ARHGAP17	Rho GTPase activating protein 17; Uncharacterized protein [Source:UniProtKB/TrEMBL;Acc:H2QAT1]	ENSPTRT00000014566	3081	3426	+
ENSPTRG00000010184	GPX4	Pan troglodytes glutathione peroxidase 4 (GPX4), mRNA. [Source:RefSeq mRNA;Acc:NM_001145823]	ENSPTRT00000018699	811	910	+
ENSPTRG00000020266	PLAG1	pleiomorphic adenoma gene 1 [Source:HGNC Symbol;Acc:HGNC:9045]	ENSPTRT00000037547	6541	6730	+
ENSPTRG00000008663	DLG4	discs, large homolog 4 (Drosophila) [Source:HGNC Symbol;Acc:HGNC:2903]	ENSPTRT00000015973	3081	3180	+
ENSPTRG00000020267	CHCHD7	coiled-coil-helix-coiled-coil-helix domain containing 7 [Source:HGNC Symbol;Acc:HGNC:28314]	ENSPTRT00000049678	521	740	+
ENSPTRG00000003551	ZNF408	Uncharacterized protein; Zinc finger protein 408 [Source:UniProtKB/TrEMBL;Acc:H2Q3I1]	ENSPTRT00000006682	2331	2488	+
ENSPTRG00000011673	FAM49A	family with sequence similarity 49, member A [Source:HGNC Symbol;Acc:HGNC:25373]	ENSPTRT00000021753	1188	1485	+
ENSPTRG00000000475	TMEM234	transmembrane protein 234 [Source:HGNC Symbol;Acc:HGNC:28837]	ENSPTRT00000000932	1241	1350	+
ENSPTRG00000017734	GFOD1	glucose-fructose oxidoreductase domain containing 1 [Source:HGNC Symbol;Acc:HGNC:21096]	ENSPTRT00000032773	1051	1210	+
ENSPTRG00000020902	PIGO	Uncharacterized protein [Source:UniProtKB/TrEMBL;Acc:H2QX77]	ENSPTRT00000038673	3318	3650	+
ENSPTRG00000014833	LARS2	Leucyl-tRNA synthetase 2, mitochondrial; Uncharacterized protein [Source:UniProtKB/TrEMBL;Acc:H2QMF8]	ENSPTRT00000027732	3951	4090	+
ENSPTRG00000010034	POLI	polymerase (DNA directed) iota [Source:HGNC Symbol;Acc:HGNC:9182]	ENSPTRT00000018414	1811	2281	+
ENSPTRG00000020271	IMPAD1	Inositol monophosphatase domain containing 1; Uncharacterized protein [Source:UniProtKB/TrEMBL;Acc:H2QW71]	ENSPTRT00000037553	1105	1512	+
ENSPTRG00000012494	R3HDM1	R3H domain containing 1 [Source:HGNC Symbol;Acc:HGNC:9757]	ENSPTRT00000023182	3521	3750	+
ENSPTRG00000006055	LAMP1	Pan troglodytes lysosomal-associated membrane protein 1 (LAMP1), mRNA. [Source:RefSeq mRNA;Acc:NM_001246562]	ENSPTRT00000011125	1451	1563	+
ENSPTRG00000008664	ACADVL	acyl-CoA dehydrogenase, very long chain [Source:HGNC Symbol;Acc:HGNC:92]	ENSPTRT00000015974	41	240	+
ENSPTRG00000011677	SMC6	structural maintenance of chromosomes 6 [Source:HGNC Symbol;Acc:HGNC:20466]	ENSPTRT00000021759	3561	3824	+
ENSPTRG00000019320	YWHAG	Tyrosine 3-monooxygenase/tryptophan 5-monooxygenase activation protein, gamma polypeptide; Uncharacterized protein [Source:UniProtKB/TrEMBL;Acc:H2QUT2]	ENSPTRT00000035749	681	982	+
ENSPTRG00000000484	BSDC1	BSD domain-containing protein 1 [Source:RefSeq peptide;Acc:NP_001230886]	ENSPTRT00000000946	891	1430	+
ENSPTRG00000003553	CKAP5	Cytoskeleton associated protein 5; Uncharacterized protein [Source:UniProtKB/TrEMBL;Acc:H2R5G4]	ENSPTRT00000055591	6001	6284	+
ENSPTRG00000014835	LIMD1	LIM domains containing 1; Uncharacterized protein [Source:UniProtKB/TrEMBL;Acc:H2QMF9]	ENSPTRT00000027735	3601	3760	+
ENSPTRG00000022164	TSC22D3	TSC22 domain family, member 3; Uncharacterized protein [Source:UniProtKB/TrEMBL;Acc:H2QYZ5]	ENSPTRT00000041273	891	1060	+
ENSPTRG00000010187	STK11	Serine/threonine kinase 11; Uncharacterized protein [Source:UniProtKB/TrEMBL;Acc:H2QET9]	ENSPTRT00000018706	2531	2700	+
ENSPTRG00000020277	SDCBP	Pan troglodytes syndecan binding protein (syntenin) (SDCBP), mRNA. [Source:RefSeq mRNA;Acc:NM_001246446]	ENSPTRT00000037559	1081	1180	+
ENSPTRG00000015933	TAPT1	Transmembrane anterior posterior transformation 1; Uncharacterized protein [Source:UniProtKB/TrEMBL;Acc:H2RC85]	ENSPTRT00000065366	2076	2339	+
ENSPTRG00000006180	THTPA	thiamine triphosphatase [Source:HGNC Symbol;Acc:HGNC:18987]	ENSPTRT00000011340	1091	1290	+
ENSPTRG00000020903	STOML2	Stomatin (EPB72)-like 2; Uncharacterized protein [Source:UniProtKB/TrEMBL;Acc:H2QX79]	ENSPTRT00000038675	631	740	+
ENSPTRG00000006181	AP1G2	adaptor-related protein complex 1, gamma 2 subunit [Source:HGNC Symbol;Acc:HGNC:556]	ENSPTRT00000042937	2701	2870	+
ENSPTRG00000014373	CBY1	Chibby homolog 1; Uncharacterized protein [Source:UniProtKB/TrEMBL;Acc:H2QLN8]	ENSPTRT00000026861	541	710	+
ENSPTRG00000006060	TMCO3	Transmembrane and coiled-coil domains 3; Uncharacterized protein [Source:UniProtKB/TrEMBL;Acc:H2Q7U4]	ENSPTRT00000011135	53	734	+
ENSPTRG00000030256	SACM1L	SAC1 suppressor of actin mutations 1-like (yeast) [Source:HGNC Symbol;Acc:HGNC:17059]	ENSPTRT00000058433	1631	1760	+
ENSPTRG00000005163	USP15	Ubiquitin carboxyl-terminal hydrolase [Source:UniProtKB/TrEMBL;Acc:H2Q6D4]	ENSPTRT00000009494	2681	3036	+
ENSPTRG00000014374	TOMM22	Translocase of outer mitochondrial membrane 22 homolog; Uncharacterized protein [Source:UniProtKB/TrEMBL;Acc:H2QLN9]	ENSPTRT00000026862	961	1077	+
ENSPTRG00000013250	JAG1	Delta-like protein [Source:UniProtKB/TrEMBL;Acc:H2QJZ0]	ENSPTRT00000024635	4441	4610	+
ENSPTRG00000019326	DTX2	deltex 2, E3 ubiquitin ligase [Source:HGNC Symbol;Acc:HGNC:15973]	ENSPTRT00000035762	1041	1360	+
ENSPTRG00000012496	UBXN4	UBX domain-containing protein 4 [Source:RefSeq peptide;Acc:NP_001233439]	ENSPTRT00000049278	1281	1520	+
ENSPTRG00000014840	LZTFL1	Leucine zipper transcription factor-like 1; Uncharacterized protein [Source:UniProtKB/TrEMBL;Acc:H2QMG1]	ENSPTRT00000027744	911	1040	+
ENSPTRG00000014375	JOSD1	Josephin domain containing 1; Uncharacterized protein [Source:UniProtKB/TrEMBL;Acc:H2QLP0]	ENSPTRT00000026863	2881	3030	+
ENSPTRG00000010040	TCF4	transcription factor 4 [Source:HGNC Symbol;Acc:HGNC:11634]	ENSPTRT00000047273	871	980	+
ENSPTRG00000010190	ATP5D	ATP synthase, H+ transporting, mitochondrial F1 complex, delta subunit; Uncharacterized protein [Source:UniProtKB/TrEMBL;Acc:H2QEU1]	ENSPTRT00000018709	884	990	+
ENSPTRG00000006069	RASA3	RAS p21 protein activator 3; Uncharacterized protein [Source:UniProtKB/TrEMBL;Acc:H2Q7U7]	ENSPTRT00000011148	3981	4170	+
ENSPTRG00000014376	GTPBP1	GTP binding protein 1; Uncharacterized protein [Source:UniProtKB/TrEMBL;Acc:H2QLP1]	ENSPTRT00000026864	1661	1790	+
ENSPTRG00000006882	LPCAT4	Lysophosphatidylcholine acyltransferase 4; Uncharacterized protein [Source:UniProtKB/TrEMBL;Acc:H2Q941]	ENSPTRT00000012701	1461	1743	+
ENSPTRG00000012498	MCM6	Minichromosome maintenance complex component 6; Uncharacterized protein [Source:UniProtKB/TrEMBL;Acc:H2QIR9]	ENSPTRT00000023188	2261	2760	+
ENSPTRG00000009418			ENSPTRT00000017286	211	620	+
ENSPTRG00000015936	QDPR	Quinoid dihydropteridine reductase; Uncharacterized protein [Source:UniProtKB/TrEMBL;Acc:H2QP94]	ENSPTRT00000029745	151	310	+
ENSPTRG00000023985	SUN2	Sad1 and UNC84 domain containing 2; Unc-84 homolog B; Uncharacterized protein [Source:UniProtKB/TrEMBL;Acc:H2R4A1]	ENSPTRT00000044290	2451	2820	+
ENSPTRG00000020279	NSMAF	Uncharacterized protein [Source:UniProtKB/TrEMBL;Acc:H2QW76]	ENSPTRT00000037563	2861	3180	+
ENSPTRG00000020904	FAM214B	family with sequence similarity 214, member B [Source:HGNC Symbol;Acc:HGNC:25666]	ENSPTRT00000038678	1891	2050	+
ENSPTRG00000017743	JARID2	Jumonji, AT rich interactive domain 2; Uncharacterized protein [Source:UniProtKB/TrEMBL;Acc:H2R7M3]	ENSPTRT00000032790	2151	2330	+
ENSPTRG00000000491	YARS	Tyrosyl-tRNA synthetase; Uncharacterized protein [Source:UniProtKB/TrEMBL;Acc:H2PYL0]	ENSPTRT00000000956	2453	2799	+
ENSPTRG00000022170	ATG4A	Pan troglodytes autophagy related 4A, cysteine peptidase (ATG4A), mRNA. [Source:RefSeq mRNA;Acc:NM_001246528]	ENSPTRT00000041282	1695	1831	+
ENSPTRG00000028525	POMZP3	POM121 and ZP3 fusion [Source:HGNC Symbol;Acc:HGNC:9203]	ENSPTRT00000035756	511	621	+
ENSPTRG00000019325		Uncharacterized protein [Source:UniProtKB/TrEMBL;Acc:H2QUT6]	ENSPTRT00000035765	181	343	+
ENSPTRG00000010196	NDUFS7	NADH dehydrogenase (ubiquinone) Fe-S protein 7, 20kDa (NADH-coenzyme Q reductase) [Source:HGNC Symbol;Acc:HGNC:7714]	ENSPTRT00000062449	521	640	+
ENSPTRG00000008668	CTDNEP1	Dullard homolog; Uncharacterized protein [Source:UniProtKB/TrEMBL;Acc:H2QC27]	ENSPTRT00000015980	781	1110	+
ENSPTRG00000023743	MYLIP	Myosin regulatory light chain interacting protein; Uncharacterized protein [Source:UniProtKB/TrEMBL;Acc:H2R0D4]	ENSPTRT00000043466	1471	1830	+
ENSPTRG00000003555	C11ORF49	Uncharacterized protein [Source:UniProtKB/TrEMBL;Acc:H2R5G3]	ENSPTRT00000055584	951	1110	+
ENSPTRG00000039212		Uncharacterized protein [Source:UniProtKB/TrEMBL;Acc:H2RHH5]	ENSPTRT00000074078	14	160	+
ENSPTRG00000010199	DAZAP1	Uncharacterized protein [Source:UniProtKB/TrEMBL;Acc:H2R6J1]	ENSPTRT00000018725	1111	1359	+
ENSPTRG00000000492	S100PBP	S100P binding protein [Source:HGNC Symbol;Acc:HGNC:25768]	ENSPTRT00000045664	511	1030	+
ENSPTRG00000013252	BTBD3	BTB (POZ) domain containing 3; Uncharacterized protein [Source:UniProtKB/TrEMBL;Acc:H2QJZ1]	ENSPTRT00000024637	1181	1580	+
ENSPTRG00000007913	IL4R	interleukin 4 receptor [Source:HGNC Symbol;Acc:HGNC:6015]	ENSPTRT00000014593	2671	3090	+
ENSPTRG00000005156	XRCC6BP1	Uncharacterized protein; XRCC6 binding protein 1 [Source:UniProtKB/TrEMBL;Acc:H2Q6D0]	ENSPTRT00000009482	701	1069	+
ENSPTRG00000014382	APOBEC3A	apolipoprotein B mRNA editing enzyme, catalytic polypeptide-like 3A [Source:HGNC Symbol;Acc:HGNC:17343]	ENSPTRT00000026872	881	980	+
ENSPTRG00000012501	CXCR4	Pan troglodytes chemokine (C-X-C motif) receptor 4 (CXCR4), mRNA. [Source:RefSeq mRNA;Acc:NM_001009047]	ENSPTRT00000023193	1091	1190	+
ENSPTRG00000010042	WDR7	WD repeat domain 7 [Source:HGNC Symbol;Acc:HGNC:13490]	ENSPTRT00000018426	2281	2960	+
ENSPTRG00000005155	CTDSP2	CTD (Carboxy-terminal domain, RNA polymerase II, polypeptide A) small phosphatase 2; Uncharacterized protein [Source:UniProtKB/TrEMBL;Acc:H2Q6C9]	ENSPTRT00000009481	1268	1743	+
ENSPTRG00000010200		Uncharacterized protein [Source:UniProtKB/TrEMBL;Acc:H2QEU6]	ENSPTRT00000018727	391	530	+
ENSPTRG00000014384	APOBEC3B	apolipoprotein B mRNA editing enzyme, catalytic polypeptide-like 3B [Source:HGNC Symbol;Acc:HGNC:17352]	ENSPTRT00000026877	1	130	+
ENSPTRG00000015941	DCAF16	DDB1 and CUL4 associated factor 16; Uncharacterized protein [Source:UniProtKB/TrEMBL;Acc:H2QP99]	ENSPTRT00000029752	231	622	+
ENSPTRG00000000496	RNF19B	ring finger protein 19B [Source:HGNC Symbol;Acc:HGNC:26886]	ENSPTRT00000045611	1660	2221	+
ENSPTRG00000015942	NCAPG	Non-SMC condensin I complex, subunit G; Uncharacterized protein [Source:UniProtKB/TrEMBL;Acc:H2QPA0]	ENSPTRT00000029754	3051	3262	+
ENSPTRG00000007914	IL21R	interleukin 21 receptor [Source:HGNC Symbol;Acc:HGNC:6006]	ENSPTRT00000014595	4501	4660	+
ENSPTRG00000019335	PION	Pigeon homolog; Uncharacterized protein [Source:UniProtKB/TrEMBL;Acc:H2QUT9]	ENSPTRT00000035778	2881	3120	+
ENSPTRG00000006891	AQR	Aquarius homolog; Uncharacterized protein [Source:UniProtKB/TrEMBL;Acc:H2Q944]	ENSPTRT00000012712	4163	4651	+
ENSPTRG00000042451	DHRS4L1	Pan troglodytes dehydrogenase/reductase (SDR family) member 4 like 1 (DHRS4L1), mRNA. [Source:RefSeq mRNA;Acc:NM_001251894]	ENSPTRT00000059572	1101	1245	+
ENSPTRG00000020281	TOX	Thymocyte selection-associated high mobility group box; Uncharacterized protein [Source:UniProtKB/TrEMBL;Acc:H2QW77]	ENSPTRT00000037566	2071	2190	+
ENSPTRG00000008674	EIF5A	eukaryotic translation initiation factor 5A [Source:HGNC Symbol;Acc:HGNC:3300]	ENSPTRT00000047981	771	910	+
ENSPTRG00000003556	ARFGAP2	ADP-ribosylation factor GTPase activating protein 2; Uncharacterized protein [Source:UniProtKB/TrEMBL;Acc:H2Q3I4]	ENSPTRT00000006691	2641	2760	+
ENSPTRG00000041588	APOBEC3DE	Apobec3DE; Uncharacterized protein [Source:UniProtKB/TrEMBL;Acc:G3KJ92]	ENSPTRT00000026883	1091	1280	+
ENSPTRG00000023046	GPS2	G protein pathway suppressor 2; Uncharacterized protein [Source:UniProtKB/TrEMBL;Acc:H2QC31]	ENSPTRT00000015991	1171	1330	+
ENSPTRG00000000499	AK2	Adenylate kinase 2; Uncharacterized protein [Source:UniProtKB/TrEMBL;Acc:H2PYL4]	ENSPTRT00000000968	3351	3490	+
ENSPTRG00000024219	ABI1	Uncharacterized protein [Source:UniProtKB/TrEMBL;Acc:H2R3A3]	ENSPTRT00000043990	1681	1864	+
ENSPTRG00000007915	GTF3C1	general transcription factor IIIC, polypeptide 1, alpha 220kDa [Source:HGNC Symbol;Acc:HGNC:4664]	ENSPTRT00000047908	5581	5830	+
ENSPTRG00000010204	PCSK4	proprotein convertase subtilisin/kexin type 4 [Source:HGNC Symbol;Acc:HGNC:8746]	ENSPTRT00000018733	1351	1600	+
ENSPTRG00000005152	TSFM	Elongation factor Ts, mitochondrial [Source:UniProtKB/TrEMBL;Acc:H2Q6C7]	ENSPTRT00000009476	878	1138	+
ENSPTRG00000014391	CBX7	Chromobox homolog 7; Uncharacterized protein [Source:UniProtKB/TrEMBL;Acc:H2QLQ1]	ENSPTRT00000026892	67	390	+
ENSPTRG00000005151	METTL21B	methyltransferase like 21B [Source:HGNC Symbol;Acc:HGNC:24936]	ENSPTRT00000009474	771	960	+
ENSPTRG00000014392	PDGFB	platelet-derived growth factor beta polypeptide [Source:HGNC Symbol;Acc:HGNC:8800]	ENSPTRT00000026893	2011	2379	+
ENSPTRG00000019337	PTPN12	Protein tyrosine phosphatase, non-receptor type 12; Uncharacterized protein [Source:UniProtKB/TrEMBL;Acc:H2QUU0]	ENSPTRT00000035781	1281	1800	+
ENSPTRG00000010209	MBD3	Methyl-CpG binding domain protein 3; Uncharacterized protein [Source:UniProtKB/TrEMBL;Acc:H2R3B9]	ENSPTRT00000048384	1191	1470	+
ENSPTRG00000012504	SPOPL	Speckle-type POZ protein-like; Uncharacterized protein [Source:UniProtKB/TrEMBL;Acc:H2QIS3]	ENSPTRT00000023198	2561	2760	+
ENSPTRG00000017751	FAM8A1	Family with sequence similarity 8, member A1; Uncharacterized protein [Source:UniProtKB/TrEMBL;Acc:H2QSC3]	ENSPTRT00000032815	85	310	+
ENSPTRG00000020286	CHD7	chromodomain helicase DNA binding protein 7 [Source:HGNC Symbol;Acc:HGNC:20626]	ENSPTRT00000037572	9161	9479	+
ENSPTRG00000017167	TNFAIP8	Tumor necrosis factor, alpha-induced protein 8; Uncharacterized protein [Source:UniProtKB/TrEMBL;Acc:H2QRD4]	ENSPTRT00000031783	851	1060	+
ENSPTRG00000017752	NUP153	nucleoporin 153kDa [Source:HGNC Symbol;Acc:HGNC:8062]	ENSPTRT00000050225	4841	5030	+
ENSPTRG00000020911	TESK1	Testis-specific kinase 1; Uncharacterized protein [Source:UniProtKB/TrEMBL;Acc:H2QX81]	ENSPTRT00000038690	2001	2454	+
ENSPTRG00000033982		Uncharacterized protein [Source:UniProtKB/TrEMBL;Acc:H2RD69]	ENSPTRT00000066824	283	539	+
ENSPTRG00000017168	HSD17B4	Hydroxysteroid (17-beta) dehydrogenase 4; Uncharacterized protein [Source:UniProtKB/TrEMBL;Acc:H2QRD5]	ENSPTRT00000031784	2131	2409	+
ENSPTRG00000007917	KIAA0556	KIAA0556 [Source:HGNC Symbol;Acc:HGNC:29068]	ENSPTRT00000014601	2771	3000	+
ENSPTRG00000010211	TCF3	transcription factor 3 [Source:HGNC Symbol;Acc:HGNC:11633]	ENSPTRT00000066105	2091	2340	+
ENSPTRG00000014395	TAB1	TGF-beta activated kinase 1/MAP3K7 binding protein 1 [Source:HGNC Symbol;Acc:HGNC:18157]	ENSPTRT00000026902	2121	2310	+
ENSPTRG00000005148	2015-03-09	membrane-associated ring finger (C3HC4) 9 [Source:HGNC Symbol;Acc:HGNC:25139]	ENSPTRT00000009469	1781	1960	+
ENSPTRG00000011690	LAPTM4A	lysosomal protein transmembrane 4 alpha [Source:HGNC Symbol;Acc:HGNC:6924]	ENSPTRT00000021778	1151	1250	+
ENSPTRG00000005147	CDK4	Cyclin-dependent kinase 4; Uncharacterized protein [Source:UniProtKB/TrEMBL;Acc:H2QZZ4]	ENSPTRT00000009467	1241	1406	+
ENSPTRG00000010047	NARS	Pan troglodytes asparaginyl-tRNA synthetase (NARS), mRNA. [Source:RefSeq mRNA;Acc:NM_001246373]	ENSPTRT00000018431	2751	2860	+
ENSPTRG00000014397	MIEF1	mitochondrial elongation factor 1 [Source:HGNC Symbol;Acc:HGNC:25979]	ENSPTRT00000026905	4151	4344	+
ENSPTRG00000033884	ACAP1	ArfGAP with coiled-coil, ankyrin repeat and PH domains 1 [Source:HGNC Symbol;Acc:HGNC:16467]	ENSPTRT00000066539	601	910	+
ENSPTRG00000003558	DDB2	Damage-specific DNA binding protein 2, 48kDa; Uncharacterized protein [Source:UniProtKB/TrEMBL;Acc:H2Q3I6]	ENSPTRT00000006693	1401	1840	+
ENSPTRG00000019338	RSBN1L	round spermatid basic protein 1-like [Source:HGNC Symbol;Acc:HGNC:24765]	ENSPTRT00000035783	2351	2581	+
ENSPTRG00000014398	ATF4	Pan troglodytes activating transcription factor 4 (tax-responsive enhancer element B67) (ATF4), mRNA. [Source:RefSeq mRNA;Acc:NM_001252517]	ENSPTRT00000026908	1041	1330	+
ENSPTRG00000023628	ZNF770	Uncharacterized protein; Zinc finger protein 770 [Source:UniProtKB/TrEMBL;Acc:H2R3R5]	ENSPTRT00000044254	294	1124	+
ENSPTRG00000010213	REXO1	REX1, RNA exonuclease 1 homolog (S. cerevisiae) [Source:HGNC Symbol;Acc:HGNC:24616]	ENSPTRT00000018750	1091	1490	+
ENSPTRG00000000503	ZNF362	Uncharacterized protein [Source:UniProtKB/TrEMBL;Acc:H2PYL6]	ENSPTRT00000000979	1551	1730	+
ENSPTRG00000000505	PHC2	Uncharacterized protein [Source:UniProtKB/TrEMBL;Acc:H2PYL7]	ENSPTRT00000000983	2499	2790	+
ENSPTRG00000006191	PCK2	phosphoenolpyruvate carboxykinase 2 (mitochondrial) [Source:HGNC Symbol;Acc:HGNC:8725]	ENSPTRT00000011360	1741	2192	+
ENSPTRG00000020913	SIT1	signaling threshold regulating transmembrane adaptor 1 [Source:HGNC Symbol;Acc:HGNC:17710]	ENSPTRT00000038692	653	878	+
ENSPTRG00000014399	RPS19BP1	Ribosomal protein S19 binding protein 1; Uncharacterized protein [Source:UniProtKB/TrEMBL;Acc:H2QLQ8]	ENSPTRT00000026909	691	920	+
ENSPTRG00000010215	ABHD17A	abhydrolase domain containing 17A [Source:HGNC Symbol;Acc:HGNC:28756]	ENSPTRT00000018752	1451	1652	+
ENSPTRG00000020914	CCDC107	Coiled-coil domain containing 107; Uncharacterized protein [Source:UniProtKB/TrEMBL;Acc:H2QX84]	ENSPTRT00000038693	571	912	+
ENSPTRG00000007919	XPO6	Exportin 6; Uncharacterized protein [Source:UniProtKB/TrEMBL;Acc:H2QAT9]	ENSPTRT00000014604	3771	4315	+
ENSPTRG00000005146	TSPAN31	Tetraspanin 31; Uncharacterized protein [Source:UniProtKB/TrEMBL;Acc:H2Q6C2]	ENSPTRT00000009465	711	860	+
ENSPTRG00000011692	PUM2	Pumilio homolog 2; Uncharacterized protein [Source:UniProtKB/TrEMBL;Acc:H2QHH7]	ENSPTRT00000021781	4567	4820	+
ENSPTRG00000010048	ATP8B1	ATPase, aminophospholipid transporter, class I, type 8B, member 1 [Source:HGNC Symbol;Acc:HGNC:3706]	ENSPTRT00000018432	3589	3780	+
ENSPTRG00000042465	SCAMP4	Uncharacterized protein [Source:UniProtKB/TrEMBL;Acc:H2RHP3]	ENSPTRT00000075188	1051	1250	+
ENSPTRG00000003559	ACP2	Pan troglodytes acid phosphatase 2, lysosomal (ACP2), mRNA. [Source:RefSeq mRNA;Acc:NM_001246489]	ENSPTRT00000006695	1781	2050	+
ENSPTRG00000005144	OS9	Osteosarcoma amplified 9, endoplasmic reticulum lectin; Uncharacterized protein [Source:UniProtKB/TrEMBL;Acc:H2Q6C0]	ENSPTRT00000009459	2241	2360	+
ENSPTRG00000020915	ARHGEF39	Rho guanine nucleotide exchange factor (GEF) 39 [Source:HGNC Symbol;Acc:HGNC:25909]	ENSPTRT00000038695	1071	1283	+
ENSPTRG00000013271	SNRPB2	small nuclear ribonucleoprotein polypeptide B [Source:HGNC Symbol;Acc:HGNC:11155]	ENSPTRT00000024668	981	1090	+
ENSPTRG00000010218	CSNK1G2	casein kinase 1, gamma 2 [Source:HGNC Symbol;Acc:HGNC:2455]	ENSPTRT00000018762	1	140	+
ENSPTRG00000006192	DCAF11	DDB1 and CUL4 associated factor 11; Uncharacterized protein [Source:UniProtKB/TrEMBL;Acc:H2Q816]	ENSPTRT00000011361	1451	1614	+
ENSPTRG00000012510	ARHGAP15	Rho GTPase activating protein 15 [Source:HGNC Symbol;Acc:HGNC:21030]	ENSPTRT00000023207	231	460	+
ENSPTRG00000022178	ACSL4	Acyl-CoA synthetase long-chain family member 4; Uncharacterized protein [Source:UniProtKB/TrEMBL;Acc:H2QZ01]	ENSPTRT00000041328	1961	2183	+
ENSPTRG00000010051	NEDD4L	Uncharacterized protein [Source:UniProtKB/TrEMBL;Acc:H2RCB1]	ENSPTRT00000065473	3211	3489	+
ENSPTRG00000008684	NLGN2	Uncharacterized protein [Source:UniProtKB/TrEMBL;Acc:H2R9S9]	ENSPTRT00000016004	1461	1648	+
ENSPTRG00000010221	MOB3A	MOB kinase activator 3A [Source:HGNC Symbol;Acc:HGNC:29802]	ENSPTRT00000050968	3021	3140	+
ENSPTRG00000015955	DHX15	DEAH (Asp-Glu-Ala-His) box polypeptide 15; Uncharacterized protein [Source:UniProtKB/TrEMBL;Acc:H2QPA3]	ENSPTRT00000029773	2431	2658	+
ENSPTRG00000008687	TMEM102	transmembrane protein 102 [Source:HGNC Symbol;Acc:HGNC:26722]	ENSPTRT00000016009	1521	1690	+
ENSPTRG00000010222	IZUMO4	IZUMO family member 4 [Source:HGNC Symbol;Acc:HGNC:26950]	ENSPTRT00000065909	741	912	+
ENSPTRG00000012511	GTDC1	Glycosyltransferase-like domain containing 1; Uncharacterized protein [Source:UniProtKB/TrEMBL;Acc:H2QIS8]	ENSPTRT00000023208	1691	1880	+
ENSPTRG00000002378	YME1L1	YME1-like 1 ATPase [Source:HGNC Symbol;Acc:HGNC:12843]	ENSPTRT00000004367	3381	3540	+
ENSPTRG00000014862	CCDC12	coiled-coil domain containing 12 [Source:HGNC Symbol;Acc:HGNC:28332]	ENSPTRT00000027782	34	210	+
ENSPTRG00000008689	CHRNB1	cholinergic receptor, nicotinic, beta 1 (muscle) [Source:HGNC Symbol;Acc:HGNC:1961]	ENSPTRT00000016011	1591	1840	+
ENSPTRG00000032527		Uncharacterized protein [Source:UniProtKB/TrEMBL;Acc:H2RAX8]	ENSPTRT00000062135	1061	1240	+
ENSPTRG00000014864	NBEAL2	neurobeachin-like 2 [Source:HGNC Symbol;Acc:HGNC:31928]	ENSPTRT00000044276	5811	5950	+
ENSPTRG00000012513	ZEB2	Uncharacterized protein; Zinc finger E-box binding homeobox 2 [Source:UniProtKB/TrEMBL;Acc:H2QIS9]	ENSPTRT00000023211	4201	4330	+
ENSPTRG00000010223	AP3D1	adaptor-related protein complex 3, delta 1 subunit [Source:HGNC Symbol;Acc:HGNC:568]	ENSPTRT00000018776	4701	4980	+
ENSPTRG00000008690	ZBTB4	Uncharacterized protein; Zinc finger and BTB domain containing 4 [Source:UniProtKB/TrEMBL;Acc:H2QC42]	ENSPTRT00000016012	2315	2580	+
ENSPTRG00000008691	POLR2A	polymerase (RNA) II (DNA directed) polypeptide A, 220kDa [Source:HGNC Symbol;Acc:HGNC:9187]	ENSPTRT00000048304	4941	5870	+
ENSPTRG00000006194	PSME1	Proteasome (Prosome, macropain) activator subunit 1 (PA28 alpha); Uncharacterized protein [Source:UniProtKB/TrEMBL;Acc:H2Q818]	ENSPTRT00000011367	231	455	+
ENSPTRG00000003561	MADD	MAP-kinase activating death domain [Source:HGNC Symbol;Acc:HGNC:6766]	ENSPTRT00000045254	5891	6010	+
ENSPTRG00000002379	MASTL	Microtubule associated serine/threonine kinase-like; Uncharacterized protein [Source:UniProtKB/TrEMBL;Acc:H2Q1R7]	ENSPTRT00000004369	1701	1940	+
ENSPTRG00000020917	TLN1	talin 1 [Source:HGNC Symbol;Acc:HGNC:11845]	ENSPTRT00000065139	7721	8020	+
ENSPTRG00000017757	KDM1B	Lysine (K)-specific demethylase 1B; Uncharacterized protein [Source:UniProtKB/TrEMBL;Acc:H2QSC6]	ENSPTRT00000032824	3301	3410	+
ENSPTRG00000040723	TNFSF12	Pan troglodytes tumor necrosis factor (ligand) superfamily, member 12 (TNFSF12), mRNA. [Source:RefSeq mRNA;Acc:NM_001205129]	ENSPTRT00000016014	1131	1310	+
ENSPTRG00000006903	SPRED1	Sprouty-related, EVH1 domain containing 1; Uncharacterized protein [Source:UniProtKB/TrEMBL;Acc:H2Q949]	ENSPTRT00000012732	1895	2154	+
ENSPTRG00000017758	DEK	DEK oncogene; Uncharacterized protein [Source:UniProtKB/TrEMBL;Acc:H2QSC7]	ENSPTRT00000032825	1001	1110	+
ENSPTRG00000006904	FAM98B	family with sequence similarity 98, member B [Source:HGNC Symbol;Acc:HGNC:26773]	ENSPTRT00000012733	1	190	+
ENSPTRG00000006195	EMC9	ER membrane protein complex subunit 9 [Source:HGNC Symbol;Acc:HGNC:20273]	ENSPTRT00000011369	601	830	+
ENSPTRG00000015959	SEPSECS	Sep (O-phosphoserine) tRNA:Sec (selenocysteine) tRNA synthase [Source:HGNC Symbol;Acc:HGNC:30605]	ENSPTRT00000029781	1333	1688	+
ENSPTRG00000006905	RASGRP1	RAS guanyl releasing protein 1 (calcium and DAG-regulated) [Source:HGNC Symbol;Acc:HGNC:9878]	ENSPTRT00000012734	2571	2720	+
ENSPTRG00000020298	ARMC1	Armadillo repeat-containing protein 1 [Source:UniProtKB/TrEMBL;Acc:H2QW84]	ENSPTRT00000037590	1581	1731	+
ENSPTRG00000007938	ATXN2L	ataxin 2-like [Source:HGNC Symbol;Acc:HGNC:31326]	ENSPTRT00000050910	791	940	+
ENSPTRG00000002380	ACBD5	Acyl-CoA binding domain containing 5; Uncharacterized protein [Source:UniProtKB/TrEMBL;Acc:H2Q1R8]	ENSPTRT00000004372	1211	1450	+
ENSPTRG00000017759	RNF144B	Ring finger protein 144B; Uncharacterized protein [Source:UniProtKB/TrEMBL;Acc:H2QSC8]	ENSPTRT00000032827	1611	1710	+
ENSPTRG00000014866	SETD2	Uncharacterized protein [Source:UniProtKB/TrEMBL;Acc:H2QMH8]	ENSPTRT00000027789	5351	5670	+
ENSPTRG00000028644	SNX2	sorting nexin 2 [Source:HGNC Symbol;Acc:HGNC:11173]	ENSPTRT00000055572	1312	1560	+
ENSPTRG00000014407	ADSL	adenylosuccinate lyase [Source:HGNC Symbol;Acc:HGNC:291]	ENSPTRT00000026924	1411	1530	+
ENSPTRG00000008693	SENP3	Pan troglodytes SUMO1/sentrin/SMT3 specific peptidase 3 (SENP3), mRNA. [Source:RefSeq mRNA;Acc:NM_001205128]	ENSPTRT00000016020	591	870	+
ENSPTRG00000020919	GBA2	Non-lysosomal glucosylceramidase [Source:UniProtKB/TrEMBL;Acc:H2QX87]	ENSPTRT00000038705	3156	3486	+
ENSPTRG00000040553	ZMYM6NB	ZMYM6 neighbor [Source:HGNC Symbol;Acc:HGNC:40021]	ENSPTRT00000001012	641	811	+
ENSPTRG00000017761	MBOAT1	membrane bound O-acyltransferase domain containing 1 [Source:HGNC Symbol;Acc:HGNC:21579]	ENSPTRT00000044506	1331	1430	+
ENSPTRG00000000515	ZMYM6	Uncharacterized protein; Zinc finger, MYM-type 6 [Source:UniProtKB/TrEMBL;Acc:H2R988]	ENSPTRT00000001011	3821	4057	+
ENSPTRG00000041217		Uncharacterized protein [Source:UniProtKB/TrEMBL;Acc:H2RHT2]	ENSPTRT00000076005	4171	4320	+
ENSPTRG00000006197	RNF31	Ring finger protein 31; Uncharacterized protein [Source:UniProtKB/TrEMBL;Acc:H2Q821]	ENSPTRT00000011372	3401	3500	+
ENSPTRG00000030991	PDE7A	phosphodiesterase 7A [Source:HGNC Symbol;Acc:HGNC:8791]	ENSPTRT00000059891	2761	2890	+
ENSPTRG00000015962	ZCCHC4	Uncharacterized protein; Zinc finger, CCHC domain containing 4 [Source:UniProtKB/TrEMBL;Acc:H2QPA8]	ENSPTRT00000029785	1421	1610	+
ENSPTRG00000008694	EIF4A1	Pan troglodytes eukaryotic translation initiation factor 4A, isoform 1 (EIF4A1), mRNA. [Source:RefSeq mRNA;Acc:NM_001098575]	ENSPTRT00000016021	1221	1388	+
ENSPTRG00000023584	E2F3	E2F transcription factor 3 [Source:HGNC Symbol;Acc:HGNC:3115]	ENSPTRT00000042063	1041	1190	+
ENSPTRG00000011702	ATAD2B	ATPase family, AAA domain containing 2B; Uncharacterized protein [Source:UniProtKB/TrEMBL;Acc:H2QHI2]	ENSPTRT00000021795	4161	4300	+
ENSPTRG00000010225	DOT1L	DOT1-like histone H3K79 methyltransferase [Source:HGNC Symbol;Acc:HGNC:24948]	ENSPTRT00000067663	4521	4640	+
ENSPTRG00000000518	SFPQ	Pan troglodytes splicing factor, proline- and glutamine-rich (SFPQ), mRNA. [Source:RefSeq mRNA;Acc:NM_001251847]	ENSPTRT00000001018	331	450	+
ENSPTRG00000010052	ALPK2	alpha-kinase 2 [Source:HGNC Symbol;Acc:HGNC:20565]	ENSPTRT00000018439	6011	6190	+
ENSPTRG00000007939	TUFM	Elongation factor Tu [Source:UniProtKB/TrEMBL;Acc:H2QAU9]	ENSPTRT00000014648	1521	1690	+
ENSPTRG00000002384	RAB18	RAB18, member RAS oncogene family; Uncharacterized protein [Source:UniProtKB/TrEMBL;Acc:H2R017]	ENSPTRT00000050593	441	700	+
ENSPTRG00000010053	MALT1	Mucosa associated lymphoid tissue lymphoma translocation gene 1; Uncharacterized protein [Source:UniProtKB/TrEMBL;Acc:H2QEL2]	ENSPTRT00000018441	3961	4090	+
ENSPTRG00000015963	ANAPC4	Anaphase promoting complex subunit 4; Uncharacterized protein [Source:UniProtKB/TrEMBL;Acc:H2QPA9]	ENSPTRT00000029787	2287	2628	+
ENSPTRG00000000519	ZMYM4	Uncharacterized protein; Zinc finger, MYM-type 4 [Source:UniProtKB/TrEMBL;Acc:H2PYM2]	ENSPTRT00000001019	5041	5260	+
ENSPTRG00000020302	TRIM55	tripartite motif containing 55 [Source:HGNC Symbol;Acc:HGNC:14215]	ENSPTRT00000037598	1961	2086	+
ENSPTRG00000014868	KLHL18	Kelch-like 18; Uncharacterized protein [Source:UniProtKB/TrEMBL;Acc:H2QMI0]	ENSPTRT00000027797	3301	3510	+
ENSPTRG00000011705	UBXN2A	UBX domain protein 2A; Uncharacterized protein [Source:UniProtKB/TrEMBL;Acc:H2QHI3]	ENSPTRT00000021798	861	1200	+
ENSPTRG00000017181	CEP120	Centrosomal protein 120kDa; Uncharacterized protein [Source:UniProtKB/TrEMBL;Acc:H2QRE4]	ENSPTRT00000031802	2711	3088	+
ENSPTRG00000020920	RGP1	Uncharacterized protein [Source:UniProtKB/TrEMBL;Acc:H2QX88]	ENSPTRT00000038706	5791	6060	+
ENSPTRG00000007940	SH2B1	SH2B adaptor protein 1 [Source:HGNC Symbol;Acc:HGNC:30417]	ENSPTRT00000014650	452	645	+
ENSPTRG00000013279	MGME1	mitochondrial genome maintenance exonuclease 1 [Source:HGNC Symbol;Acc:HGNC:16205]	ENSPTRT00000024680	991	1380	+
ENSPTRG00000014869	PTPN23	protein tyrosine phosphatase, non-receptor type 23 [Source:HGNC Symbol;Acc:HGNC:14406]	ENSPTRT00000027799	4711	5010	+
ENSPTRG00000000521	KIAA0319L	KIAA0319-like; Uncharacterized protein [Source:UniProtKB/TrEMBL;Acc:H2PYM3]	ENSPTRT00000001021	451	750	+
ENSPTRG00000014408	SGSM3	small G protein signaling modulator 3 [Source:HGNC Symbol;Acc:HGNC:25228]	ENSPTRT00000026927	1	140	+
ENSPTRG00000017774	MRS2	MRS2 magnesium homeostasis factor homolog; Uncharacterized protein [Source:UniProtKB/TrEMBL;Acc:H2QSD5]	ENSPTRT00000032849	1321	1480	+
ENSPTRG00000034494	IRF9	Interferon regulatory factor 9; Uncharacterized protein [Source:UniProtKB/TrEMBL;Acc:H2RBA9]	ENSPTRT00000063867	1491	1670	+
ENSPTRG00000013282	CSRP2BP	CSRP2 binding protein; Uncharacterized protein [Source:UniProtKB/TrEMBL;Acc:H2QK03]	ENSPTRT00000024687	1461	1630	+
ENSPTRG00000012525	MMADHC	methylmalonic aciduria (cobalamin deficiency) cblD type, with homocystinuria [Source:HGNC Symbol;Acc:HGNC:25221]	ENSPTRT00000023226	691	803	+
ENSPTRG00000014409	MKL1	megakaryoblastic leukemia (translocation) 1 [Source:HGNC Symbol;Acc:HGNC:14334]	ENSPTRT00000067106	2521	2799	+
ENSPTRG00000005138	DCTN2	Uncharacterized protein [Source:UniProtKB/TrEMBL;Acc:H2R0L3]	ENSPTRT00000044815	271	556	+
ENSPTRG00000010060	LMAN1	Lectin, mannose-binding, 1; Uncharacterized protein [Source:UniProtKB/TrEMBL;Acc:H2QEL7]	ENSPTRT00000018453	4411	4599	+
ENSPTRG00000014412	SLC25A17	Uncharacterized protein [Source:UniProtKB/TrEMBL;Acc:H2QLR6]	ENSPTRT00000026936	1081	1356	+
ENSPTRG00000000522	NCDN	Neurochondrin; Uncharacterized protein [Source:UniProtKB/TrEMBL;Acc:H2R2Y1]	ENSPTRT00000042093	421	590	+
ENSPTRG00000006199	REC8	REC8 meiotic recombination protein [Source:HGNC Symbol;Acc:HGNC:16879]	ENSPTRT00000011376	1101	1360	+
ENSPTRG00000017182	CSNK1G3	Casein kinase 1, gamma 3; Uncharacterized protein [Source:UniProtKB/TrEMBL;Acc:H2RAT8]	ENSPTRT00000061959	1361	1531	+
ENSPTRG00000010233	LSM7	LSM7 homolog, U6 small nuclear RNA associated; Uncharacterized protein [Source:UniProtKB/TrEMBL;Acc:H2QEW6]	ENSPTRT00000018794	381	480	+
ENSPTRG00000008695	CD68	CD68 molecule; Uncharacterized protein [Source:UniProtKB/TrEMBL;Acc:H2QC47]	ENSPTRT00000016022	511	610	+
ENSPTRG00000000525	C1orf216	chromosome 1 open reading frame 216 [Source:HGNC Symbol;Acc:HGNC:26800]	ENSPTRT00000001027	841	960	+
ENSPTRG00000011713	ITSN2	intersectin 2 [Source:HGNC Symbol;Acc:HGNC:6184]	ENSPTRT00000021817	5301	5430	+
ENSPTRG00000013289	RBBP9	Retinoblastoma binding protein 9; Uncharacterized protein [Source:UniProtKB/TrEMBL;Acc:H2QK07]	ENSPTRT00000024696	401	560	+
ENSPTRG00000013290	SEC23B	Sec23 homolog B (S. cerevisiae) [Source:HGNC Symbol;Acc:HGNC:10702]	ENSPTRT00000024700	1811	2040	+
ENSPTRG00000017184	GRAMD3	GRAM domain containing 3 [Source:HGNC Symbol;Acc:HGNC:24911]	ENSPTRT00000031809	1831	2050	+
ENSPTRG00000020309	VCPIP1	Uncharacterized protein; Valosin containing protein (P97)/p47 complex interacting protein 1 [Source:UniProtKB/TrEMBL;Acc:H2QW91]	ENSPTRT00000037613	3671	3830	+
ENSPTRG00000010238	LMNB2	lamin B2 [Source:HGNC Symbol;Acc:HGNC:6638]	ENSPTRT00000018803	4051	4230	+
ENSPTRG00000006910	EIF2AK4	Eukaryotic translation initiation factor 2 alpha kinase 4; Uncharacterized protein [Source:UniProtKB/TrEMBL;Acc:H2Q956]	ENSPTRT00000012740	5131	5230	+
ENSPTRG00000002388	WAC	Uncharacterized protein; WW domain containing adaptor with coiled-coil [Source:UniProtKB/TrEMBL;Acc:H2Q1S2]	ENSPTRT00000004387	2005	2184	+
ENSPTRG00000012534	RIF1	RAP1 interacting factor homolog; Uncharacterized protein [Source:UniProtKB/TrEMBL;Acc:H2QIT9]	ENSPTRT00000023239	7421	7720	+
ENSPTRG00000014875	SMARCC1	SWI/SNF related, matrix associated, actin dependent regulator of chromatin, subfamily c, member 1; Uncharacterized protein [Source:UniProtKB/TrEMBL;Acc:H2QMI4]	ENSPTRT00000027816	2331	2770	+
ENSPTRG00000015967	C4ORF52	Uncharacterized protein [Source:UniProtKB/TrEMBL;Acc:H2QPB2]	ENSPTRT00000029791	611	770	+
ENSPTRG00000010243	SGTA	Small glutamine-rich tetratricopeptide repeat (TPR)-containing, alpha; Uncharacterized protein [Source:UniProtKB/TrEMBL;Acc:H2QEX4]	ENSPTRT00000018808	1541	1841	+
ENSPTRG00000006200	IPO4	Importin 4; Uncharacterized protein [Source:UniProtKB/TrEMBL;Acc:H2R168]	ENSPTRT00000045329	3271	3417	+
ENSPTRG00000015968	RBPJ	recombination signal binding protein for immunoglobulin kappa J region [Source:HGNC Symbol;Acc:HGNC:5724]	ENSPTRT00000048176	1552	1916	+
ENSPTRG00000008698	FXR2	Fragile X mental retardation, autosomal homolog 2; Uncharacterized protein [Source:UniProtKB/TrEMBL;Acc:H2QC50]	ENSPTRT00000016027	2851	2980	+
ENSPTRG00000007944	CD19	CD19 molecule [Source:HGNC Symbol;Acc:HGNC:1633]	ENSPTRT00000014658	21	150	+
ENSPTRG00000003564	SLC39A13	solute carrier family 39 (zinc transporter), member 13 [Source:HGNC Symbol;Acc:HGNC:20859]	ENSPTRT00000006711	1821	1980	+
ENSPTRG00000019350	CACNA2D1	Calcium channel, voltage-dependent, alpha 2/delta subunit 1; Uncharacterized protein [Source:UniProtKB/TrEMBL;Acc:H2R2A6]	ENSPTRT00000047191	3471	3670	+
ENSPTRG00000022205	PLS3	plastin 3 [Source:HGNC Symbol;Acc:HGNC:9091]	ENSPTRT00000041377	201	320	+
ENSPTRG00000020930	CLTA	clathrin, light chain A [Source:HGNC Symbol;Acc:HGNC:2090]	ENSPTRT00000038722	725	860	+
ENSPTRG00000014417	RBX1	Ring-box 1, E3 ubiquitin protein ligase; Uncharacterized protein [Source:UniProtKB/TrEMBL;Acc:H2QLR9]	ENSPTRT00000026942	391	490	+
ENSPTRG00000039026	MBD6	Methyl-CpG binding domain protein 6; Uncharacterized protein [Source:UniProtKB/TrEMBL;Acc:H2RID1]	ENSPTRT00000072863	3141	3350	+
ENSPTRG00000007967	KIF22	Kinesin family member 22; Uncharacterized protein [Source:UniProtKB/TrEMBL;Acc:H2QAV4]	ENSPTRT00000014699	1711	1870	+
ENSPTRG00000014418	EP300	Pan troglodytes E1A binding protein p300 (EP300), mRNA. [Source:RefSeq mRNA;Acc:NM_001244670]	ENSPTRT00000026944	7341	7658	+
ENSPTRG00000022212	DOCK11	dedicator of cytokinesis 11 [Source:HGNC Symbol;Acc:HGNC:23483]	ENSPTRT00000045896	5761	5918	+
ENSPTRG00000008699	SAT2	spermidine/spermine N1-acetyltransferase family member 2 [Source:HGNC Symbol;Acc:HGNC:23160]	ENSPTRT00000016028	821	950	+
ENSPTRG00000000527	EIF2C4	Uncharacterized protein [Source:UniProtKB/TrEMBL;Acc:H2R2M1]	ENSPTRT00000001032	4761	4920	+
ENSPTRG00000006912	BMF	Bcl2 modifying factor [Source:HGNC Symbol;Acc:HGNC:24132]	ENSPTRT00000048729	2782	3000	+
ENSPTRG00000011715	NCOA1	Nuclear receptor coactivator 1; Uncharacterized protein [Source:UniProtKB/TrEMBL;Acc:H2QHJ2]	ENSPTRT00000021820	4441	4573	+
ENSPTRG00000006913	BUB1B	Budding uninhibited by benzimidazoles 1 homolog beta; Uncharacterized protein [Source:UniProtKB/TrEMBL;Acc:H2Q958]	ENSPTRT00000012746	1471	1690	+
ENSPTRG00000000528	EIF2C1	Eukaryotic translation initiation factor 2C, 1; Uncharacterized protein [Source:UniProtKB/TrEMBL;Acc:H2PYM7]	ENSPTRT00000001033	2901	3090	+
ENSPTRG00000005135	MARS	Methionyl-tRNA synthetase; Uncharacterized protein [Source:UniProtKB/TrEMBL;Acc:H2Q6B5]	ENSPTRT00000009437	2631	2884	+
ENSPTRG00000017778	TDP2	Uncharacterized protein [Source:UniProtKB/TrEMBL;Acc:H2QSD8]	ENSPTRT00000032858	1071	1350	+
ENSPTRG00000014419	L3MBTL2	L(3)mbt-like 2; Uncharacterized protein [Source:UniProtKB/TrEMBL;Acc:H2QLS1]	ENSPTRT00000026945	3031	3186	+
ENSPTRG00000020931	GNE	glucosamine (UDP-N-acetyl)-2-epimerase/N-acetylmannosamine kinase [Source:HGNC Symbol;Acc:HGNC:23657]	ENSPTRT00000038723	2091	2373	+
ENSPTRG00000010074	KIAA1468	KIAA1468 [Source:HGNC Symbol;Acc:HGNC:29289]	ENSPTRT00000018478	191	340	+
ENSPTRG00000014877	DHX30	DEAH (Asp-Glu-Ala-His) box helicase 30 [Source:HGNC Symbol;Acc:HGNC:16716]	ENSPTRT00000027823	1151	1860	+
ENSPTRG00000022214	IL13RA1	interleukin 13 receptor, alpha 1 [Source:HGNC Symbol;Acc:HGNC:5974]	ENSPTRT00000041402	1258	1728	+
ENSPTRG00000017779	ACOT13	Acyl-CoA thioesterase 13; Uncharacterized protein [Source:UniProtKB/TrEMBL;Acc:H2QSD9]	ENSPTRT00000032859	501	752	+
ENSPTRG00000020317	COPS5	COP9 signalosome subunit 5 [Source:HGNC Symbol;Acc:HGNC:2240]	ENSPTRT00000046757	1281	1440	+
ENSPTRG00000007968	MAZ	MYC-associated zinc finger protein (purine-binding transcription factor) [Source:HGNC Symbol;Acc:HGNC:6914]	ENSPTRT00000014701	801	1000	+
ENSPTRG00000017188	LMNB1	Lamin B1; Uncharacterized protein [Source:UniProtKB/TrEMBL;Acc:H2QRE7]	ENSPTRT00000031815	2821	3020	+
ENSPTRG00000017780	C6orf62	chromosome 6 open reading frame 62 [Source:HGNC Symbol;Acc:HGNC:20998]	ENSPTRT00000032860	1211	1488	+
ENSPTRG00000015971	STIM2	stromal interaction molecule 2 [Source:HGNC Symbol;Acc:HGNC:19205]	ENSPTRT00000060295	3084	3480	+
ENSPTRG00000017781	GMNN	Geminin, DNA replication inhibitor; Uncharacterized protein [Source:UniProtKB/TrEMBL;Acc:H2QSE1]	ENSPTRT00000032861	651	828	+
ENSPTRG00000033944	PTPMT1	protein tyrosine phosphatase, mitochondrial 1 [Source:HGNC Symbol;Acc:HGNC:26965]	ENSPTRT00000067681	681	917	+
ENSPTRG00000003570	KBTBD4	kelch repeat and BTB (POZ) domain containing 4 [Source:HGNC Symbol;Acc:HGNC:23761]	ENSPTRT00000045232	911	1440	+
ENSPTRG00000014878	MAP4	microtubule-associated protein 4 [Source:HGNC Symbol;Acc:HGNC:6862]	ENSPTRT00000027829	1081	1350	+
ENSPTRG00000023600	RANGAP1	Ran GTPase activating protein 1; Uncharacterized protein [Source:UniProtKB/TrEMBL;Acc:H2R2J5]	ENSPTRT00000044493	2641	3014	+
ENSPTRG00000020933	RNF38	ring finger protein 38 [Source:HGNC Symbol;Acc:HGNC:18052]	ENSPTRT00000045497	1661	1970	+
ENSPTRG00000017782	FAM65B	family with sequence similarity 65, member B [Source:HGNC Symbol;Acc:HGNC:13872]	ENSPTRT00000032863	1498	1730	+
ENSPTRG00000003571	NDUFS3	Pan troglodytes NADH dehydrogenase (ubiquinone) Fe-S protein 3, 30kDa (NADH-coenzyme Q reductase) (NDUFS3), nuclear gene encoding mitochondrial protein, mRNA. [Source:RefSeq mRNA;Acc:NM_001079913]	ENSPTRT00000006726	771	950	+
ENSPTRG00000010253	AES	amino-terminal enhancer of split [Source:HGNC Symbol;Acc:HGNC:307]	ENSPTRT00000018825	1321	1426	+
ENSPTRG00000010075	TNFRSF11A	tumor necrosis factor receptor superfamily, member 11a, NFKB activator [Source:HGNC Symbol;Acc:HGNC:11908]	ENSPTRT00000018479	1121	1510	+
ENSPTRG00000030609	CRNKL1	crooked neck pre-mRNA splicing factor 1 [Source:HGNC Symbol;Acc:HGNC:15762]	ENSPTRT00000059221	2141	2390	+
ENSPTRG00000010076	ZCCHC2	zinc finger, CCHC domain containing 2 [Source:HGNC Symbol;Acc:HGNC:22916]	ENSPTRT00000018480	3361	3580	+
ENSPTRG00000010258	NCLN	Nicalin; Uncharacterized protein [Source:UniProtKB/TrEMBL;Acc:H2QEY3]	ENSPTRT00000018834	1821	2343	+
ENSPTRG00000005134	ARHGAP9	Rho GTPase activating protein 9 [Source:HGNC Symbol;Acc:HGNC:14130]	ENSPTRT00000009434	2326	2576	+
ENSPTRG00000011717	CENPO	Centromere protein O; Uncharacterized protein [Source:UniProtKB/TrEMBL;Acc:H2QHJ4]	ENSPTRT00000021822	1701	1868	+
ENSPTRG00000032568		Uncharacterized protein [Source:UniProtKB/TrEMBL;Acc:H2Q823]	ENSPTRT00000011382	1421	1520	+
ENSPTRG00000033794	MTPAP	mitochondrial poly(A) polymerase [Source:HGNC Symbol;Acc:HGNC:25532]	ENSPTRT00000066207	1991	2150	+
ENSPTRG00000003573	MTCH2	Uncharacterized protein [Source:UniProtKB/TrEMBL;Acc:H2Q3J4]	ENSPTRT00000006728	711	972	+
ENSPTRG00000014424	ZC3H7B	Uncharacterized protein [Source:UniProtKB/TrEMBL;Acc:H2R6Y8]	ENSPTRT00000026956	2651	2896	+
ENSPTRG00000020320	ARFGEF1	ADP-ribosylation factor guanine nucleotide-exchange factor 1(Brefeldin A-inhibited); Uncharacterized protein [Source:UniProtKB/TrEMBL;Acc:H2QW96]	ENSPTRT00000037630	5809	6398	+
ENSPTRG00000000531	ADPRHL2	ADP-ribosylhydrolase like 2; Uncharacterized protein [Source:UniProtKB/TrEMBL;Acc:H2PYM9]	ENSPTRT00000001039	1271	1540	+
ENSPTRG00000002400	MAP3K8	Mitogen-activated protein kinase kinase kinase 8; Uncharacterized protein [Source:UniProtKB/TrEMBL;Acc:H2Q1S6]	ENSPTRT00000004410	2311	2410	+
ENSPTRG00000015973	ARAP2	ArfGAP with RhoGAP domain, ankyrin repeat and PH domain 2 [Source:HGNC Symbol;Acc:HGNC:16924]	ENSPTRT00000029803	5131	5478	+
ENSPTRG00000017784	CMAH	Pan troglodytes CMP-N-acetylneuraminic acid hydroxylase (CMAH), mRNA. [Source:RefSeq mRNA;Acc:NM_001009041]	ENSPTRT00000032865	1751	2070	+
ENSPTRG00000008705	WRAP53	Uncharacterized protein; WD repeat containing, antisense to TP53 [Source:UniProtKB/TrEMBL;Acc:H2QC54]	ENSPTRT00000016035	461	656	+
ENSPTRG00000022225	UBE2A	Ubiquitin-conjugating enzyme E2A (RAD6 homolog); Uncharacterized protein [Source:UniProtKB/TrEMBL;Acc:H2QZ18]	ENSPTRT00000041420	661	910	+
ENSPTRG00000003575	FNBP4	Formin binding protein 4; Uncharacterized protein [Source:UniProtKB/TrEMBL;Acc:H2Q3J5]	ENSPTRT00000006732	2831	2960	+
ENSPTRG00000019364	DMTF1	Uncharacterized protein [Source:UniProtKB/TrEMBL;Acc:H2QUV4]	ENSPTRT00000035831	1961	2381	+
ENSPTRG00000010079	BCL2	B-cell CLL/lymphoma 2; Uncharacterized protein [Source:UniProtKB/TrEMBL;Acc:H2QEM8]	ENSPTRT00000018483	1751	1900	+
ENSPTRG00000006207	GMPR2	GMP reductase [Source:UniProtKB/TrEMBL;Acc:H2Q825]	ENSPTRT00000011391	1541	1740	+
ENSPTRG00000013306	RALGAPA2	Ral GTPase activating protein, alpha subunit 2 (catalytic) [Source:HGNC Symbol;Acc:HGNC:16207]	ENSPTRT00000066338	4351	4730	+
ENSPTRG00000014427	PHF5A	PHD finger protein 5A [Source:HGNC Symbol;Acc:HGNC:18000]	ENSPTRT00000026959	645	850	+
ENSPTRG00000010080	KDSR	3-ketodihydrosphingosine reductase; Uncharacterized protein [Source:UniProtKB/TrEMBL;Acc:H2QEM9]	ENSPTRT00000018484	1065	1370	+
ENSPTRG00000017195	PRRC1	proline-rich coiled-coil 1 [Source:HGNC Symbol;Acc:HGNC:28164]	ENSPTRT00000031826	1341	1482	+
ENSPTRG00000014882	NME6	NME/NM23 nucleoside diphosphate kinase 6 [Source:HGNC Symbol;Acc:HGNC:20567]	ENSPTRT00000027836	661	810	+
ENSPTRG00000040277			ENSPTRT00000074040	428	700	+
ENSPTRG00000000533	TRAPPC3	Trafficking protein particle complex 3; Uncharacterized protein [Source:UniProtKB/TrEMBL;Acc:H2PYN0]	ENSPTRT00000001042	651	844	+
ENSPTRG00000010261	NFIC	nuclear factor I/C (CCAAT-binding transcription factor) [Source:HGNC Symbol;Acc:HGNC:7786]	ENSPTRT00000018841	181	280	+
ENSPTRG00000014430	POLR3H	Polymerase (RNA) III (DNA directed) polypeptide H (22.9kD); Uncharacterized protein [Source:UniProtKB/TrEMBL;Acc:H2QLS5]	ENSPTRT00000026963	931	1300	+
ENSPTRG00000022227	2015-09-06	septin 6 [Source:HGNC Symbol;Acc:HGNC:15848]	ENSPTRT00000041427	801	1085	+
ENSPTRG00000002404	ZEB1	zinc finger E-box binding homeobox 1 [Source:HGNC Symbol;Acc:HGNC:11642]	ENSPTRT00000048969	3341	3700	+
ENSPTRG00000010083	VPS4B	Uncharacterized protein; Vacuolar protein sorting 4 homolog B [Source:UniProtKB/TrEMBL;Acc:H2QEN0]	ENSPTRT00000018490	371	600	+
ENSPTRG00000003577	NUP160	Nucleoporin 160kDa; Uncharacterized protein [Source:UniProtKB/TrEMBL;Acc:H2R5F5]	ENSPTRT00000055567	4261	4624	+
ENSPTRG00000007977	TAOK2	Uncharacterized protein [Source:UniProtKB/TrEMBL;Acc:H2QAW1]	ENSPTRT00000014721	3321	3420	+
ENSPTRG00000013308	XRN2	5'-3' exoribonuclease 2; Uncharacterized protein [Source:UniProtKB/TrEMBL;Acc:H2QK18]	ENSPTRT00000024733	1231	1450	+
ENSPTRG00000010263	DOHH	deoxyhypusine hydroxylase/monooxygenase [Source:HGNC Symbol;Acc:HGNC:28662]	ENSPTRT00000018846	693	896	+
ENSPTRG00000002406	ARHGAP12	Rho GTPase activating protein 12 [Source:HGNC Symbol;Acc:HGNC:16348]	ENSPTRT00000004426	2781	3000	+
ENSPTRG00000014884	PLXNB1	Plexin B1; Uncharacterized protein [Source:UniProtKB/TrEMBL;Acc:H2QMJ0]	ENSPTRT00000027838	6861	7080	+
ENSPTRG00000000535	THRAP3	Thyroid hormone receptor associated protein 3; Uncharacterized protein [Source:UniProtKB/TrEMBL;Acc:H2PYN1]	ENSPTRT00000001047	3221	3361	+
ENSPTRG00000014433	PPPDE2	PPPDE peptidase domain containing 2; Uncharacterized protein [Source:UniProtKB/TrEMBL;Acc:H2QLS7]	ENSPTRT00000026968	611	883	+
ENSPTRG00000019367	CROT	carnitine O-octanoyltransferase [Source:HGNC Symbol;Acc:HGNC:2366]	ENSPTRT00000035838	2911	3114	+
ENSPTRG00000012538	ARL5A	ADP-ribosylation factor-like 5A; Uncharacterized protein [Source:UniProtKB/TrEMBL;Acc:H2R0M4]	ENSPTRT00000050898	791	929	+
ENSPTRG00000022548	XRCC6	X-ray repair complementing defective repair in Chinese hamster cells 6 [Source:HGNC Symbol;Acc:HGNC:4055]	ENSPTRT00000050424	1	130	+
ENSPTRG00000015979	PGM2	phosphoglucomutase 2 [Source:HGNC Symbol;Acc:HGNC:8906]	ENSPTRT00000029814	1591	1770	+
ENSPTRG00000010268	HMG20B	high mobility group 20B [Source:HGNC Symbol;Acc:HGNC:5002]	ENSPTRT00000018858	301	520	+
ENSPTRG00000028212	ZBTB33	Uncharacterized protein; Zinc finger and BTB domain containing 33 [Source:UniProtKB/TrEMBL;Acc:H2R4K5]	ENSPTRT00000054905	2041	2200	+
ENSPTRG00000005121	STAT6	signal transducer and activator of transcription 6, interleukin-4 induced [Source:HGNC Symbol;Acc:HGNC:11368]	ENSPTRT00000009405	2371	2670	+
ENSPTRG00000020936	PAX5	paired box 5 [Source:HGNC Symbol;Acc:HGNC:8619]	ENSPTRT00000056562	2306	2840	+
ENSPTRG00000006208	TINF2	Pan troglodytes TERF1 (TRF1)-interacting nuclear factor 2 (TINF2), mRNA. [Source:RefSeq mRNA;Acc:NM_001246606]	ENSPTRT00000011394	1201	1595	+
ENSPTRG00000014435	NHP2L1	NHP2 non-histone chromosome protein 2-like 1 (S. cerevisiae) [Source:HGNC Symbol;Acc:HGNC:7819]	ENSPTRT00000065846	971	1333	+
ENSPTRG00000022240	CUL4B	cullin 4B [Source:HGNC Symbol;Acc:HGNC:2555]	ENSPTRT00000041456	2111	2850	+
ENSPTRG00000015981	TBC1D1	TBC1 (tre-2/USP6, BUB2, cdc16) domain family, member 1 [Source:HGNC Symbol;Acc:HGNC:11578]	ENSPTRT00000029816	3651	4050	+
ENSPTRG00000007978	HIRIP3	HIRA interacting protein 3; Uncharacterized protein [Source:UniProtKB/TrEMBL;Acc:H2QAW2]	ENSPTRT00000014722	1061	1310	+
ENSPTRG00000000537	EVA1B	eva-1 homolog B (C. elegans) [Source:HGNC Symbol;Acc:HGNC:25558]	ENSPTRT00000001051	781	960	+
ENSPTRG00000006919	C15H15orf23	Pan troglodytes chromosome 15 open reading frame 23 ortholog (C15H15orf23), mRNA. [Source:RefSeq mRNA;Acc:NM_001251887]	ENSPTRT00000012756	1081	1270	+
ENSPTRG00000012540	STAM2	Signal transducing adaptor molecule (SH3 domain and ITAM motif) 2; Uncharacterized protein [Source:UniProtKB/TrEMBL;Acc:H2R6H2]	ENSPTRT00000023246	1881	2114	+
ENSPTRG00000002408	KIF5B	Kinesin family member 5B; Uncharacterized protein [Source:UniProtKB/TrEMBL;Acc:H2R425]	ENSPTRT00000042936	2501	2860	+
ENSPTRG00000014436	MEI1	meiosis inhibitor 1 [Source:HGNC Symbol;Acc:HGNC:28613]	ENSPTRT00000026971	3801	4000	+
ENSPTRG00000022241	MCTS1	Malignant T cell amplified sequence 1; Uncharacterized protein [Source:UniProtKB/TrEMBL;Acc:H2QZ28]	ENSPTRT00000041457	811	920	+
ENSPTRG00000007979	INO80E	INO80 complex subunit E [Source:HGNC Symbol;Acc:HGNC:26905]	ENSPTRT00000066871	531	630	+
ENSPTRG00000011723	DNMT3A	DNA (cytosine-5-)-methyltransferase 3 alpha [Source:HGNC Symbol;Acc:HGNC:2978]	ENSPTRT00000065900	2851	3000	+
ENSPTRG00000015983	KLF3	Kruppel-like factor 3 (Basic); Uncharacterized protein [Source:UniProtKB/TrEMBL;Acc:H2QPC1]	ENSPTRT00000029819	661	800	+
ENSPTRG00000017200	FBN2	fibrillin 2 [Source:HGNC Symbol;Acc:HGNC:3604]	ENSPTRT00000031844	8391	8879	+
ENSPTRG00000020939	ZCCHC7	zinc finger, CCHC domain containing 7 [Source:HGNC Symbol;Acc:HGNC:26209]	ENSPTRT00000073138	921	1120	+
ENSPTRG00000003578	PTPRJ	protein tyrosine phosphatase, receptor type, J [Source:HGNC Symbol;Acc:HGNC:9673]	ENSPTRT00000006736	4181	4439	+
ENSPTRG00000000541	MRPS15	Mitochondrial ribosomal protein S15; Uncharacterized protein [Source:UniProtKB/TrEMBL;Acc:H2PYN6]	ENSPTRT00000001060	821	937	+
ENSPTRG00000020940	GRHPR	glyoxylate reductase/hydroxypyruvate reductase [Source:HGNC Symbol;Acc:HGNC:4570]	ENSPTRT00000038746	51	190	+
ENSPTRG00000005120	NAB2	NGFI-A binding protein 2 (EGR1 binding protein 2); Uncharacterized protein [Source:UniProtKB/TrEMBL;Acc:H2Q6A3]	ENSPTRT00000009402	762	1060	+
ENSPTRG00000007983	ALDOA	Pan troglodytes aldolase A, fructose-bisphosphate (ALDOA), mRNA. [Source:RefSeq mRNA;Acc:NM_001144833]	ENSPTRT00000064205	1411	1520	+
ENSPTRG00000006920	IVD	Uncharacterized protein [Source:UniProtKB/TrEMBL;Acc:H2Q963]	ENSPTRT00000012757	1151	1280	+
ENSPTRG00000014438	CCDC134	Coiled-coil domain containing 134; Uncharacterized protein [Source:UniProtKB/TrEMBL;Acc:H2QLS9]	ENSPTRT00000026973	701	880	+
ENSPTRG00000019369	ABCB1	ATP-binding cassette, sub-family B (MDR/TAP), member 1 [Source:HGNC Symbol;Acc:HGNC:40]	ENSPTRT00000035843	4181	4524	+
ENSPTRG00000005119	TMEM194A	Transmembrane protein 194A; Uncharacterized protein [Source:UniProtKB/TrEMBL;Acc:H2Q6A2]	ENSPTRT00000009400	4121	4270	+
ENSPTRG00000023028	BAHD1	bromo adjacent homology domain containing 1 [Source:HGNC Symbol;Acc:HGNC:29153]	ENSPTRT00000050264	951	1210	+
ENSPTRG00000014439	SREBF2	Uncharacterized protein [Source:UniProtKB/TrEMBL;Acc:H2QLT0]	ENSPTRT00000026976	4411	4510	+
ENSPTRG00000003696	OSBP	Oxysterol-binding protein [Source:UniProtKB/TrEMBL;Acc:H2Q3R2]	ENSPTRT00000006906	3821	3941	+
ENSPTRG00000012543	PRPF40A	PRP40 pre-mRNA processing factor 40 homolog A; Uncharacterized protein [Source:UniProtKB/TrEMBL;Acc:H2R0E8]	ENSPTRT00000047111	2512	2680	+
ENSPTRG00000006923	C15orf57	chromosome 15 open reading frame 57 [Source:HGNC Symbol;Acc:HGNC:28295]	ENSPTRT00000043376	561	990	+
ENSPTRG00000008710	KDM6B	lysine (K)-specific demethylase 6B [Source:HGNC Symbol;Acc:HGNC:29012]	ENSPTRT00000075604	3122	3536	+
ENSPTRG00000000544	ZC3H12A	Uncharacterized protein [Source:UniProtKB/TrEMBL;Acc:H2PYN9]	ENSPTRT00000001069	1301	1560	+
ENSPTRG00000020941	ZBTB5	Uncharacterized protein; Zinc finger and BTB domain containing 5 [Source:UniProtKB/TrEMBL;Acc:H2QXA0]	ENSPTRT00000038748	2021	2190	+
ENSPTRG00000020944	POLR1E	polymerase (RNA) I polypeptide E, 53kDa [Source:HGNC Symbol;Acc:HGNC:17631]	ENSPTRT00000042273	1591	1920	+
ENSPTRG00000006210	RABGGTA	Rab geranylgeranyltransferase, alpha subunit; Uncharacterized protein [Source:UniProtKB/TrEMBL;Acc:H2Q828]	ENSPTRT00000011397	1981	2140	+
ENSPTRG00000013318	CD93	CD93 molecule [Source:HGNC Symbol;Acc:HGNC:15855]	ENSPTRT00000024744	1111	1290	+
ENSPTRG00000022246	THOC2	THO complex 2; Uncharacterized protein [Source:UniProtKB/TrEMBL;Acc:H2QZ30]	ENSPTRT00000041467	4251	4778	+
ENSPTRG00000013319	NXT1	NTF2-like export factor 1; Uncharacterized protein [Source:UniProtKB/TrEMBL;Acc:H2QK26]	ENSPTRT00000024745	711	870	+
ENSPTRG00000013320	GZF1	Pan troglodytes GDNF-inducible zinc finger protein 1 (GZF1), mRNA. [Source:RefSeq mRNA;Acc:NM_001114622]	ENSPTRT00000048702	741	870	+
ENSPTRG00000013321	NAPB	N-ethylmaleimide-sensitive factor attachment protein, beta; Uncharacterized protein [Source:UniProtKB/TrEMBL;Acc:H2QK28]	ENSPTRT00000024747	2451	2630	+
ENSPTRG00000003697	PATL1	Protein associated with topoisomerase II homolog 1; Uncharacterized protein [Source:UniProtKB/TrEMBL;Acc:H2Q3R3]	ENSPTRT00000006907	3921	4024	+
ENSPTRG00000010275	APBA3	Amyloid beta (A4) protein-binding, family A, member 3; Uncharacterized protein [Source:UniProtKB/TrEMBL;Acc:H2QEZ6]	ENSPTRT00000018869	541	680	+
ENSPTRG00000015990	WDR19	Uncharacterized protein; WD repeat domain 19 [Source:UniProtKB/TrEMBL;Acc:H2QPC5]	ENSPTRT00000029828	2861	3020	+
ENSPTRG00000014885	CCDC51	Coiled-coil domain containing 51; Uncharacterized protein [Source:UniProtKB/TrEMBL;Acc:H2QMJ1]	ENSPTRT00000027845	751	950	+
ENSPTRG00000041769	TMA7	translation machinery associated 7 homolog (S. cerevisiae) [Source:HGNC Symbol;Acc:HGNC:26932]	ENSPTRT00000074225	71	170	+
ENSPTRG00000010276	MRPL54	Mitochondrial ribosomal protein L54; Uncharacterized protein [Source:UniProtKB/TrEMBL;Acc:H2QEZ7]	ENSPTRT00000018870	431	620	+
ENSPTRG00000020330	SLCO5A1	solute carrier organic anion transporter family, member 5A1 [Source:HGNC Symbol;Acc:HGNC:19046]	ENSPTRT00000037651	3241	3340	+
ENSPTRG00000022248	STAG2	stromal antigen 2 [Source:HGNC Symbol;Acc:HGNC:11355]	ENSPTRT00000041474	2181	2358	+
ENSPTRG00000014441	TNFRSF13C	tumor necrosis factor receptor superfamily, member 13C [Source:HGNC Symbol;Acc:HGNC:17755]	ENSPTRT00000026978	291	410	+
ENSPTRG00000014442	CENPM	Centromere protein M; Uncharacterized protein [Source:UniProtKB/TrEMBL;Acc:H2QLT2]	ENSPTRT00000026979	761	912	+
ENSPTRG00000008714	CHD3	chromodomain helicase DNA binding protein 3 [Source:HGNC Symbol;Acc:HGNC:1918]	ENSPTRT00000016052	6531	6670	+
ENSPTRG00000017795	TRIM38	Tripartite motif containing 38; Uncharacterized protein [Source:UniProtKB/TrEMBL;Acc:H2QSE9]	ENSPTRT00000032882	1921	2040	+
ENSPTRG00000006927	FAM82A2	Pan troglodytes family with sequence similarity 82, member A2 (FAM82A2), mRNA. [Source:RefSeq mRNA;Acc:NM_001246600]	ENSPTRT00000012776	1891	2110	+
ENSPTRG00000000547	SNIP1	Smad nuclear interacting protein 1; Uncharacterized protein [Source:UniProtKB/TrEMBL;Acc:H2PYP1]	ENSPTRT00000001073	641	800	+
ENSPTRG00000012548	NR4A2	Nuclear receptor subfamily 4, group A, member 2; Uncharacterized protein [Source:UniProtKB/TrEMBL;Acc:H2QIU4]	ENSPTRT00000023257	1681	2066	+
ENSPTRG00000017202	ISOC1	Isochorismatase domain containing 1; Uncharacterized protein [Source:UniProtKB/TrEMBL;Acc:H2R5E6]	ENSPTRT00000055549	851	1070	+
ENSPTRG00000012549	GPD2	Glycerol-3-phosphate dehydrogenase 2 (Mitochondrial); Uncharacterized protein [Source:UniProtKB/TrEMBL;Acc:H2R361]	ENSPTRT00000046648	5631	5750	+
ENSPTRG00000020333	NCOA2	Nuclear receptor coactivator 2; Uncharacterized protein [Source:UniProtKB/TrEMBL;Acc:H2QWA2]	ENSPTRT00000037654	2211	2480	+
ENSPTRG00000015991	RFC1	Replication factor C (Activator 1) 1, 145kDa; Uncharacterized protein [Source:UniProtKB/TrEMBL;Acc:H2QPC6]	ENSPTRT00000029829	3371	3560	+
ENSPTRG00000017808		Histone H2B [Source:UniProtKB/TrEMBL;Acc:H2RDL9]	ENSPTRT00000032904	441	580	+
ENSPTRG00000006211	DHRS1	dehydrogenase/reductase (SDR family) member 1 [Source:HGNC Symbol;Acc:HGNC:16445]	ENSPTRT00000011400	81	250	+
ENSPTRG00000000549	GNL2	Pan troglodytes guanine nucleotide binding protein-like 2 (nucleolar) (GNL2), mRNA. [Source:RefSeq mRNA;Acc:NM_001246398]	ENSPTRT00000001076	2241	2353	+
ENSPTRG00000010099	TMX3	Thioredoxin-related transmembrane protein 3; Uncharacterized protein [Source:UniProtKB/TrEMBL;Acc:H2QEN9]	ENSPTRT00000018526	1579	1962	+
ENSPTRG00000033875	TOMM5	translocase of outer mitochondrial membrane 5 homolog (yeast) [Source:HGNC Symbol;Acc:HGNC:31369]	ENSPTRT00000038755	362	621	+
ENSPTRG00000013331	GGTLC1	gamma-glutamyltransferase light chain 1 [Source:HGNC Symbol;Acc:HGNC:16437]	ENSPTRT00000024760	744	934	+
ENSPTRG00000017830	BTN3A1	Uncharacterized protein [Source:UniProtKB/TrEMBL;Acc:H2QSH4]	ENSPTRT00000032930	1591	1840	+
ENSPTRG00000002413	ITGB1	integrin, beta 1 (fibronectin receptor, beta polypeptide, antigen CD29 includes MDF2, MSK12) [Source:HGNC Symbol;Acc:HGNC:6153]	ENSPTRT00000004453	2645	2856	+
ENSPTRG00000005116	ZBTB39	Uncharacterized protein; Zinc finger and BTB domain containing 39 [Source:UniProtKB/TrEMBL;Acc:H2Q6A0]	ENSPTRT00000009397	2191	2350	+
ENSPTRG00000011726	ASXL2	Additional sex combs like 2; Uncharacterized protein [Source:UniProtKB/TrEMBL;Acc:H2QHK0]	ENSPTRT00000021847	3491	3910	+
ENSPTRG00000017206	HINT1	Histidine triad nucleotide binding protein 1; Uncharacterized protein [Source:UniProtKB/TrEMBL;Acc:H2QRF6]	ENSPTRT00000031855	521	674	+
ENSPTRG00000010286	DAPK3	Pan troglodytes death-associated protein kinase 3 (DAPK3), mRNA. [Source:RefSeq mRNA;Acc:NM_001246574]	ENSPTRT00000018891	1674	1880	+
ENSPTRG00000033813	NOP9	NOP9 nucleolar protein [Source:HGNC Symbol;Acc:HGNC:19826]	ENSPTRT00000065613	1901	2101	+
ENSPTRG00000017208	CDC42SE2	CDC42 small effector 2; Uncharacterized protein [Source:UniProtKB/TrEMBL;Acc:H2R2H3]	ENSPTRT00000048701	931	1120	+
ENSPTRG00000022934	SASH3	SAM and SH3 domain containing 3 [Source:HGNC Symbol;Acc:HGNC:15975]	ENSPTRT00000049303	1261	1510	+
ENSPTRG00000013335	C20H20ORF3	Chromosome 20 open reading frame 3; Uncharacterized protein [Source:UniProtKB/TrEMBL;Acc:H2QK40]	ENSPTRT00000024768	1761	2060	+
ENSPTRG00000003700	MRPL16	Mitochondrial ribosomal protein L16; Uncharacterized protein [Source:UniProtKB/TrEMBL;Acc:H2Q3R6]	ENSPTRT00000006911	702	1050	+
ENSPTRG00000010288	EEF2	eukaryotic translation elongation factor 2 [Source:HGNC Symbol;Acc:HGNC:3214]	ENSPTRT00000018897	1631	1840	+
ENSPTRG00000019372	DBF4	Uncharacterized protein [Source:UniProtKB/TrEMBL;Acc:H2R576]	ENSPTRT00000035848	1841	2390	+
ENSPTRG00000017209	RAPGEF6	Rap guanine nucleotide exchange factor (GEF) 6; Uncharacterized protein [Source:UniProtKB/TrEMBL;Acc:H2QRF8]	ENSPTRT00000031861	5041	5311	+
ENSPTRG00000014889	PFKFB4	6-phosphofructo-2-kinase/fructose-2, 6-biphosphatase 4; Uncharacterized protein [Source:UniProtKB/TrEMBL;Acc:H2QMJ4]	ENSPTRT00000027852	3181	3330	+
ENSPTRG00000008717	TRAPPC1	Trafficking protein particle complex 1; Uncharacterized protein [Source:UniProtKB/TrEMBL;Acc:H2QC63]	ENSPTRT00000016058	701	810	+
ENSPTRG00000020952	EXOSC3	exosome component 3 [Source:HGNC Symbol;Acc:HGNC:17944]	ENSPTRT00000038763	671	940	+
ENSPTRG00000008719	CNTROB	Uncharacterized protein [Source:UniProtKB/TrEMBL;Acc:H2QC64]	ENSPTRT00000016062	731	960	+
ENSPTRG00000000552	CDCA8	Pan troglodytes cell division cycle associated 8 (CDCA8), mRNA. [Source:RefSeq mRNA;Acc:NM_001246430]	ENSPTRT00000001080	851	1070	+
ENSPTRG00000015994	LIAS	Lipoyl synthase, mitochondrial [Source:UniProtKB/TrEMBL;Acc:H2QPC8]	ENSPTRT00000029834	1521	1643	+
ENSPTRG00000020953	DCAF10	DDB1 and CUL4 associated factor 10; Uncharacterized protein [Source:UniProtKB/TrEMBL;Acc:H2QXA6]	ENSPTRT00000038764	1421	1610	+
ENSPTRG00000010290	PIAS4	protein inhibitor of activated STAT, 4 [Source:HGNC Symbol;Acc:HGNC:17002]	ENSPTRT00000018899	61	230	+
ENSPTRG00000010292	ZBTB7A	Uncharacterized protein; Zinc finger and BTB domain containing 7A [Source:UniProtKB/TrEMBL;Acc:H2QF05]	ENSPTRT00000018903	1511	1790	+
ENSPTRG00000010294	MAP2K2	Uncharacterized protein [Source:UniProtKB/TrEMBL;Acc:H2QF06]	ENSPTRT00000018907	1271	1380	+
ENSPTRG00000005108	PTGES3	Pan troglodytes prostaglandin E synthase 3 (cytosolic) (PTGES3), mRNA. [Source:RefSeq mRNA;Acc:NM_001246402]	ENSPTRT00000009388	1011	1200	+
ENSPTRG00000012553	CYTIP	cytohesin 1 interacting protein [Source:HGNC Symbol;Acc:HGNC:9506]	ENSPTRT00000023263	1061	1350	+
ENSPTRG00000011729	RAB10	RAB10, member RAS oncogene family; Uncharacterized protein [Source:UniProtKB/TrEMBL;Acc:H2QHK2]	ENSPTRT00000021850	1031	1250	+
ENSPTRG00000017829	BTN2A2	butyrophilin, subfamily 2, member A2 [Source:HGNC Symbol;Acc:HGNC:1137]	ENSPTRT00000042859	2281	2380	+
ENSPTRG00000007984	PPP4C	Serine/threonine-protein phosphatase [Source:UniProtKB/TrEMBL;Acc:H2RA87]	ENSPTRT00000014735	981	1273	+
ENSPTRG00000020956	ALDH1B1	Aldehyde dehydrogenase 1 family, member B1; Uncharacterized protein [Source:UniProtKB/TrEMBL;Acc:H2QXA8]	ENSPTRT00000038769	1661	1810	+
ENSPTRG00000019374	ADAM22	ADAM metallopeptidase domain 22 [Source:HGNC Symbol;Acc:HGNC:201]	ENSPTRT00000064920	5901	6140	+
ENSPTRG00000015996	UGDH	UDP-glucose 6-dehydrogenase [Source:UniProtKB/TrEMBL;Acc:H2QPC9]	ENSPTRT00000029837	61	300	+
ENSPTRG00000006933	SPINT1	serine peptidase inhibitor, Kunitz type 1 [Source:HGNC Symbol;Acc:HGNC:11246]	ENSPTRT00000012784	1761	2100	+
ENSPTRG00000011732	HADHA	Hydroxyacyl-CoA dehydrogenase/3-ketoacyl-CoA thiolase/enoyl-CoA hydratase (Trifunctional protein), alpha subunit; Uncharacterized protein [Source:UniProtKB/TrEMBL;Acc:H2QHK4]	ENSPTRT00000021853	2441	2808	+
ENSPTRG00000007986	YPEL3	yippee-like 3 (Drosophila) [Source:HGNC Symbol;Acc:HGNC:18327]	ENSPTRT00000014737	541	710	+
ENSPTRG00000005107	ATP5B	ATP synthase, H+ transporting, mitochondrial F1 complex, beta polypeptide [Source:HGNC Symbol;Acc:HGNC:830]	ENSPTRT00000009387	1711	1830	+
ENSPTRG00000000557	YRDC	Uncharacterized protein [Source:UniProtKB/TrEMBL;Acc:H2PYP8]	ENSPTRT00000001086	1316	1510	+
ENSPTRG00000015998	UBE2K	Pan troglodytes ubiquitin-conjugating enzyme E2K (UBE2K), mRNA. [Source:RefSeq mRNA;Acc:NM_001246525]	ENSPTRT00000029839	771	1092	+
ENSPTRG00000029813	HMGN4	high mobility group nucleosomal binding domain 4 [Source:HGNC Symbol;Acc:HGNC:4989]	ENSPTRT00000057595	114	550	+
ENSPTRG00000012555	ACVR1	Activin A receptor, type I; Uncharacterized protein [Source:UniProtKB/TrEMBL;Acc:H2QIU9]	ENSPTRT00000023267	1962	2280	+
ENSPTRG00000017837	ZNF322A	Uncharacterized protein; Zinc finger protein 322A [Source:UniProtKB/TrEMBL;Acc:H2QSH9]	ENSPTRT00000032941	1861	2080	+
ENSPTRG00000014452	TCF20	Transcription factor 20 (AR1); Uncharacterized protein [Source:UniProtKB/TrEMBL;Acc:H2QLT9]	ENSPTRT00000027002	5401	5800	+
ENSPTRG00000000558		Uncharacterized protein [Source:UniProtKB/TrEMBL;Acc:H2PYP9]	ENSPTRT00000001087	401	560	+
ENSPTRG00000022932	MTF1	Metal-regulatory transcription factor 1; Uncharacterized protein [Source:UniProtKB/TrEMBL;Acc:H2R0J1]	ENSPTRT00000042692	2541	2710	+
ENSPTRG00000015999	PDS5A	PDS5, regulator of cohesion maintenance, homolog A; Uncharacterized protein [Source:UniProtKB/TrEMBL;Acc:H2RCA5]	ENSPTRT00000065455	4091	4950	+
ENSPTRG00000009376	PHB	Pan troglodytes prohibitin (PHB), mRNA. [Source:RefSeq mRNA;Acc:NM_001246403]	ENSPTRT00000017203	941	1040	+
ENSPTRG00000007988	MAPK3	mitogen-activated protein kinase 3 [Source:HGNC Symbol;Acc:HGNC:6877]	ENSPTRT00000014740	1661	1770	+
ENSPTRG00000017847	ZNF184	Uncharacterized protein; Zinc finger protein 184 [Source:UniProtKB/TrEMBL;Acc:H2QSI3]	ENSPTRT00000032956	2021	2120	+
ENSPTRG00000013338	ENTPD6	Ectonucleoside triphosphate diphosphohydrolase 6 (Putative); Uncharacterized protein [Source:UniProtKB/TrEMBL;Acc:H2QZG6]	ENSPTRT00000042064	2641	2750	+
ENSPTRG00000034463	FNIP1	Folliculin interacting protein 1; Uncharacterized protein [Source:UniProtKB/TrEMBL;Acc:H2QRF9]	ENSPTRT00000031866	2441	2777	+
ENSPTRG00000007989	CORO1A	coronin, actin binding protein, 1A [Source:HGNC Symbol;Acc:HGNC:2252]	ENSPTRT00000014741	1451	1573	+
ENSPTRG00000030681	INPP5B	inositol polyphosphate-5-phosphatase, 75kDa [Source:HGNC Symbol;Acc:HGNC:6077]	ENSPTRT00000059378	1333	1480	+
ENSPTRG00000020999	PGM5	phosphoglucomutase 5 [Source:HGNC Symbol;Acc:HGNC:8908]	ENSPTRT00000038832	1	260	+
ENSPTRG00000011733	HADHB	Pan troglodytes hydroxyacyl-CoA dehydrogenase/3-ketoacyl-CoA thiolase/enoyl-CoA hydratase (trifunctional protein), beta subunit (HADHB), nuclear gene encoding mitochondrial protein, mRNA. [Source:RefSeq mRNA;Acc:NM_001034119]	ENSPTRT00000021854	2011	2176	+
ENSPTRG00000033935		Uncharacterized protein [Source:UniProtKB/TrEMBL;Acc:H2QLU2]	ENSPTRT00000027016	471	687	+
ENSPTRG00000006936	VPS18	Uncharacterized protein; Vacuolar protein sorting 18 homolog [Source:UniProtKB/TrEMBL;Acc:H2Q973]	ENSPTRT00000012787	1931	2080	+
ENSPTRG00000006937	DLL4	delta-like 4 (Drosophila) [Source:HGNC Symbol;Acc:HGNC:2910]	ENSPTRT00000012788	2432	2643	+
ENSPTRG00000021001	PIP5K1B	phosphatidylinositol-4-phosphate 5-kinase, type I, beta [Source:HGNC Symbol;Acc:HGNC:8995]	ENSPTRT00000038835	2051	2250	+
ENSPTRG00000023125	ZKSCAN8	Pan troglodytes zinc finger protein 192 (ZNF192), mRNA. [Source:RefSeq mRNA;Acc:NM_001195266]	ENSPTRT00000032976	1331	1840	+
ENSPTRG00000020339	MSC	Musculin; Uncharacterized protein [Source:UniProtKB/TrEMBL;Acc:H2R068]	ENSPTRT00000048370	861	1460	+
ENSPTRG00000014460	POLDIP3	Polymerase (DNA-directed), delta interacting protein 3; Uncharacterized protein [Source:UniProtKB/TrEMBL;Acc:H2QLU3]	ENSPTRT00000027019	1341	1590	+
ENSPTRG00000009374	ZNF652	Uncharacterized protein; Zinc finger protein 652 [Source:UniProtKB/TrEMBL;Acc:H2QDD2]	ENSPTRT00000017201	2361	2580	+
ENSPTRG00000021005	TJP2	tight junction protein 2 [Source:HGNC Symbol;Acc:HGNC:11828]	ENSPTRT00000038842	3681	3944	+
ENSPTRG00000009371	ABI3	ABI family, member 3 [Source:HGNC Symbol;Acc:HGNC:29859]	ENSPTRT00000017198	2001	2100	+
ENSPTRG00000012559	PKP4	Plakophilin 4; Uncharacterized protein [Source:UniProtKB/TrEMBL;Acc:H2QIV2]	ENSPTRT00000023278	961	1180	+
ENSPTRG00000006939	INO80	INO80 homolog; Uncharacterized protein [Source:UniProtKB/TrEMBL;Acc:H2R3P6]	ENSPTRT00000050252	5381	5580	+
ENSPTRG00000013340	ABHD12	Abhydrolase domain containing 12; Uncharacterized protein [Source:UniProtKB/TrEMBL;Acc:H2QK43]	ENSPTRT00000024781	1642	2088	+
ENSPTRG00000010309	CHAF1A	Uncharacterized protein [Source:UniProtKB/TrEMBL;Acc:H2QF16]	ENSPTRT00000018938	391	640	+
ENSPTRG00000003715	MS4A1	membrane-spanning 4-domains, subfamily A, member 1 [Source:HGNC Symbol;Acc:HGNC:7315]	ENSPTRT00000055547	2151	2260	+
ENSPTRG00000022919	TERF1	Telomeric repeat binding factor (NIMA-interacting) 1; Uncharacterized protein [Source:UniProtKB/TrEMBL;Acc:H2R473]	ENSPTRT00000051064	1161	1390	+
ENSPTRG00000000559	SF3A3	Pan troglodytes splicing factor 3a, subunit 3, 60kDa (SF3A3), mRNA. [Source:RefSeq mRNA;Acc:NM_001246453]	ENSPTRT00000001088	61	190	+
ENSPTRG00000022277	RBM4B	RNA binding motif protein 4B [Source:HGNC Symbol;Acc:HGNC:28842]	ENSPTRT00000041549	3301	3400	+
ENSPTRG00000017212	CSF2	colony stimulating factor 2 (granulocyte-macrophage) [Source:HGNC Symbol;Acc:HGNC:2434]	ENSPTRT00000031869	431	645	+
ENSPTRG00000014461	CYB5R3	Uncharacterized protein [Source:UniProtKB/TrEMBL;Acc:H2QLU4]	ENSPTRT00000027020	1361	1490	+
ENSPTRG00000016002	RHOH	ras homolog family member H [Source:HGNC Symbol;Acc:HGNC:686]	ENSPTRT00000029844	981	1100	+
ENSPTRG00000006221	KHNYN	KH and NYN domain containing; Uncharacterized protein [Source:UniProtKB/TrEMBL;Acc:H2Q837]	ENSPTRT00000011415	4831	4940	+
ENSPTRG00000011735	EPT1	Pan troglodytes ethanolaminephosphotransferase 1 (CDP-ethanolamine-specific) (EPT1), mRNA. [Source:RefSeq mRNA;Acc:NM_001146697]	ENSPTRT00000021858	1303	1590	+
ENSPTRG00000020350	TMEM70	transmembrane protein 70 [Source:HGNC Symbol;Acc:HGNC:26050]	ENSPTRT00000037684	371	540	+
ENSPTRG00000010110	TIMM21	translocase of inner mitochondrial membrane 21 homolog (yeast) [Source:HGNC Symbol;Acc:HGNC:25010]	ENSPTRT00000018545	1091	1260	+
ENSPTRG00000017883	TRIM27	Tripartite motif containing 27; Uncharacterized protein [Source:UniProtKB/TrEMBL;Acc:H2QSK5]	ENSPTRT00000033008	1411	1780	+
ENSPTRG00000007995	CD2BP2	CD2 (cytoplasmic tail) binding protein 2 [Source:HGNC Symbol;Acc:HGNC:1656]	ENSPTRT00000014757	841	1051	+
ENSPTRG00000009365	UBE2Z	ubiquitin-conjugating enzyme E2Z [Source:HGNC Symbol;Acc:HGNC:25847]	ENSPTRT00000042637	2377	2546	+
ENSPTRG00000007996	TBC1D10B	TBC1 domain family, member 10B [Source:HGNC Symbol;Acc:HGNC:24510]	ENSPTRT00000050981	2121	2580	+
ENSPTRG00000013344			ENSPTRT00000024791	1371	1540	+
ENSPTRG00000012563	BAZ2B	bromodomain adjacent to zinc finger domain, 2B [Source:HGNC Symbol;Acc:HGNC:963]	ENSPTRT00000023286	6801	6980	+
ENSPTRG00000005106	BAZ2A	bromodomain adjacent to zinc finger domain, 2A [Source:HGNC Symbol;Acc:HGNC:962]	ENSPTRT00000009386	3121	3266	+
ENSPTRG00000002418	CUL2	cullin 2 [Source:HGNC Symbol;Acc:HGNC:2552]	ENSPTRT00000004474	2471	2844	+
ENSPTRG00000017901	UBD	ubiquitin D [Source:HGNC Symbol;Acc:HGNC:18795]	ENSPTRT00000033028	481	752	+
ENSPTRG00000009363	CALCOCO2	Pan troglodytes calcium binding and coiled-coil domain 2 (CALCOCO2), mRNA. [Source:RefSeq mRNA;Acc:NM_001246386]	ENSPTRT00000017189	451	1125	+
ENSPTRG00000007998	2015-09-01	septin 1 [Source:HGNC Symbol;Acc:HGNC:2879]	ENSPTRT00000014761	1461	1580	+
ENSPTRG00000010114	CNDP2	Pan troglodytes CNDP dipeptidase 2 (metallopeptidase M20 family) (CNDP2), mRNA. [Source:RefSeq mRNA;Acc:NM_001246419]	ENSPTRT00000018550	2150	2382	+
ENSPTRG00000006942	CHP1	calcineurin-like EF-hand protein 1 [Source:HGNC Symbol;Acc:HGNC:17433]	ENSPTRT00000012795	2911	3050	+
ENSPTRG00000023704	C5orf56	chromosome 5 open reading frame 56 [Source:HGNC Symbol;Acc:HGNC:33838]	ENSPTRT00000049084	214	360	+
ENSPTRG00000010319	DPP9	dipeptidyl-peptidase 9 [Source:HGNC Symbol;Acc:HGNC:18648]	ENSPTRT00000018956	4051	4260	+
ENSPTRG00000033946	SLC35F6	solute carrier family 35, member F6 [Source:HGNC Symbol;Acc:HGNC:26055]	ENSPTRT00000021870	841	1300	+
ENSPTRG00000013356	HM13	histocompatibility (minor) 13 [Source:HGNC Symbol;Acc:HGNC:16435]	ENSPTRT00000024807	1611	1725	+
ENSPTRG00000003724	PRPF19	PRP19/PSO4 pre-mRNA processing factor 19 homolog; Uncharacterized protein [Source:UniProtKB/TrEMBL;Acc:H2Q3T2]	ENSPTRT00000006945	2031	2130	+
ENSPTRG00000006944	NUSAP1	Nucleolar and spindle associated protein 1; Uncharacterized protein [Source:UniProtKB/TrEMBL;Acc:H2Q978]	ENSPTRT00000012798	1371	1537	+
ENSPTRG00000017216	IRF1	Interferon regulatory factor 1; Uncharacterized protein [Source:UniProtKB/TrEMBL;Acc:H2QRG4]	ENSPTRT00000031881	1181	1350	+
ENSPTRG00000012564	2015-03-07	Membrane-associated ring finger (C3HC4) 7; Uncharacterized protein [Source:UniProtKB/TrEMBL;Acc:H2QIV6]	ENSPTRT00000023289	2291	2390	+
ENSPTRG00000014465	PACSIN2	Protein kinase C and casein kinase substrate in neurons 2; Uncharacterized protein [Source:UniProtKB/TrEMBL;Acc:H2QLU5]	ENSPTRT00000027030	1871	2030	+
ENSPTRG00000000564			ENSPTRT00000001093	1071	1320	+
ENSPTRG00000008001	DCTPP1	Pan troglodytes dCTP pyrophosphatase 1 (DCTPP1), mRNA. [Source:RefSeq mRNA;Acc:NM_001243107]	ENSPTRT00000014764	421	730	+
ENSPTRG00000008002			ENSPTRT00000014765	901	1000	+
ENSPTRG00000008004	ITGAL	integrin alpha-L [Source:RefSeq peptide;Acc:NP_001029341]	ENSPTRT00000059160	3463	3710	+
ENSPTRG00000019384	GTPBP10	GTP-binding protein 10 (Putative); Uncharacterized protein [Source:UniProtKB/TrEMBL;Acc:H2QUW6]	ENSPTRT00000035872	1091	1260	+
ENSPTRG00000012566	LY75-CD302	LY75-CD302 readthrough [Source:HGNC Symbol;Acc:HGNC:38828]	ENSPTRT00000023291	4721	4860	+
ENSPTRG00000042414	PTAR1	Protein prenyltransferase alpha subunit repeat containing 1; Uncharacterized protein [Source:UniProtKB/TrEMBL;Acc:H2RI15]	ENSPTRT00000074570	8361	8530	+
ENSPTRG00000017218	RAD50	RAD50 homolog; Uncharacterized protein [Source:UniProtKB/TrEMBL;Acc:H2QRG6]	ENSPTRT00000031884	2531	2680	+
ENSPTRG00000003725	TMEM109	Transmembrane protein 109; Uncharacterized protein [Source:UniProtKB/TrEMBL;Acc:H2Q3T3]	ENSPTRT00000006946	1891	2088	+
ENSPTRG00000011743	TMEM214	Transmembrane protein 214; Uncharacterized protein [Source:UniProtKB/TrEMBL;Acc:H2QHL1]	ENSPTRT00000021877	2871	3001	+
ENSPTRG00000008006	ZNF768	Uncharacterized protein [Source:UniProtKB/TrEMBL;Acc:H2QAX7]	ENSPTRT00000014771	1681	1790	+
ENSPTRG00000006234	G2E3	G2/M-phase specific E3 ubiquitin protein ligase; Uncharacterized protein [Source:UniProtKB/TrEMBL;Acc:H2Q846]	ENSPTRT00000011434	2274	2388	+
ENSPTRG00000002420	CREM	cAMP responsive element modulator [Source:HGNC Symbol;Acc:HGNC:2352]	ENSPTRT00000004475	1181	1430	+
ENSPTRG00000010119	ZADH2	Uncharacterized protein; Zinc binding alcohol dehydrogenase domain containing 2 [Source:UniProtKB/TrEMBL;Acc:H2QEQ3]	ENSPTRT00000018560	3011	3153	+
ENSPTRG00000019385	CLDN12	Claudin 12; Uncharacterized protein [Source:UniProtKB/TrEMBL;Acc:H2QUW7]	ENSPTRT00000035873	341	658	+
ENSPTRG00000010121	ZNF516	zinc finger protein 516 [Source:HGNC Symbol;Acc:HGNC:28990]	ENSPTRT00000018563	1551	1760	+
ENSPTRG00000006945	NDUFAF1	Pan troglodytes NADH dehydrogenase (ubiquinone) complex I, assembly factor 1 (NDUFAF1), mRNA. [Source:RefSeq mRNA;Acc:NM_001079923]	ENSPTRT00000012799	682	960	+
ENSPTRG00000009350	SKAP1	src kinase associated phosphoprotein 1 [Source:HGNC Symbol;Acc:HGNC:15605]	ENSPTRT00000017172	1391	1560	+
ENSPTRG00000020359	PEX2	Peroxisomal biogenesis factor 2; Peroxisomal membrane protein 3, 35kDa; Uncharacterized protein [Source:UniProtKB/TrEMBL;Acc:H2R0I3]	ENSPTRT00000046943	151	520	+
ENSPTRG00000006235	SCFD1	sec1 family domain containing 1 [Source:HGNC Symbol;Acc:HGNC:20726]	ENSPTRT00000011437	1091	1320	+
ENSPTRG00000006946	RTF1	Rtf1, Paf1/RNA polymerase II complex component, homolog; Uncharacterized protein [Source:UniProtKB/TrEMBL;Acc:H2Q980]	ENSPTRT00000012800	4075	4281	+
ENSPTRG00000000573	PABPC4	Poly(A) binding protein, cytoplasmic 4 (Inducible form); Uncharacterized protein [Source:UniProtKB/TrEMBL;Acc:H2QZS4]	ENSPTRT00000048629	1571	1825	+
ENSPTRG00000008011	PRR14	Proline rich 14; Uncharacterized protein [Source:UniProtKB/TrEMBL;Acc:H2QAY3]	ENSPTRT00000014778	1251	1360	+
ENSPTRG00000033842	NCKIPSD	Uncharacterized protein [Source:UniProtKB/TrEMBL;Acc:H2QMK0]	ENSPTRT00000027881	801	1103	+
ENSPTRG00000020361	ZC2HC1A	Uncharacterized protein [Source:UniProtKB/TrEMBL;Acc:H2QWB5]	ENSPTRT00000037697	871	1050	+
ENSPTRG00000010322	TICAM1	TIR domain-containing adapter molecule 1 [Source:RefSeq peptide;Acc:NP_001123604]	ENSPTRT00000018966	71	200	+
ENSPTRG00000010324	PLIN3	perilipin 3 [Source:HGNC Symbol;Acc:HGNC:16893]	ENSPTRT00000018970	1285	1400	+
ENSPTRG00000022286	PHF6	Uncharacterized protein [Source:UniProtKB/TrEMBL;Acc:H2QZ49]	ENSPTRT00000041572	1121	1310	+
ENSPTRG00000011744	AGBL5	ATP/GTP binding protein-like 5; Uncharacterized protein [Source:UniProtKB/TrEMBL;Acc:H2R8X0]	ENSPTRT00000021878	1421	1630	+
ENSPTRG00000013359	BCL2L1	BCL2-like 1; Uncharacterized protein [Source:UniProtKB/TrEMBL;Acc:H2QK53]	ENSPTRT00000024813	1071	1340	+
ENSPTRG00000017219	IL13	Pan troglodytes interleukin 13 (IL13), mRNA. [Source:RefSeq mRNA;Acc:NM_001008992]	ENSPTRT00000031885	1111	1280	+
ENSPTRG00000014897	IP6K2	inositol hexakisphosphate kinase 2 [Source:HGNC Symbol;Acc:HGNC:17313]	ENSPTRT00000027882	501	690	+
ENSPTRG00000009349	SNX11	Pan troglodytes sorting nexin 11 (SNX11), mRNA. [Source:RefSeq mRNA;Acc:NM_001246380]	ENSPTRT00000050552	2261	2400	+
ENSPTRG00000022963	TIMELESS	Timeless homolog; Uncharacterized protein [Source:UniProtKB/TrEMBL;Acc:H2R1D2]	ENSPTRT00000050973	3901	4020	+
ENSPTRG00000013360	TPX2	TPX2, microtubule-associated [Source:HGNC Symbol;Acc:HGNC:1249]	ENSPTRT00000024815	3021	3300	+
ENSPTRG00000014468	MCAT	Malonyl CoA:ACP acyltransferase (Mitochondrial); Uncharacterized protein [Source:UniProtKB/TrEMBL;Acc:H2QLU8]	ENSPTRT00000027038	991	1270	+
ENSPTRG00000014900	SLC25A20	Solute carrier family 25 (Carnitine/acylcarnitine translocase), member 20; Uncharacterized protein [Source:UniProtKB/TrEMBL;Acc:H2QMK3]	ENSPTRT00000027891	1581	1780	+
ENSPTRG00000017221	KIF3A	kinesin-like protein KIF3A [Source:RefSeq peptide;Acc:NP_001233450]	ENSPTRT00000064973	1721	1890	+
ENSPTRG00000022631	NFE2L1	nuclear factor, erythroid 2-like 1 [Source:HGNC Symbol;Acc:HGNC:7781]	ENSPTRT00000043342	3281	3457	+
ENSPTRG00000008012	FBRS	Uncharacterized protein [Source:UniProtKB/TrEMBL;Acc:H2R153]	ENSPTRT00000045768	1481	1620	+
ENSPTRG00000014470	TTLL12	Tubulin tyrosine ligase-like family, member 12; Uncharacterized protein [Source:UniProtKB/TrEMBL;Acc:H2QLU9]	ENSPTRT00000027042	2191	2350	+
ENSPTRG00000039991	VPS37C	vacuolar protein sorting 37 homolog C (S. cerevisiae) [Source:HGNC Symbol;Acc:HGNC:26097]	ENSPTRT00000074639	811	980	+
ENSPTRG00000019389	AKAP9	A kinase (PRKA) anchor protein (Yotiao) 9; Uncharacterized protein [Source:UniProtKB/TrEMBL;Acc:H2R568]	ENSPTRT00000035882	10181	10380	+
ENSPTRG00000014902	ARIH2	Ariadne homolog 2; Uncharacterized protein [Source:UniProtKB/TrEMBL;Acc:H2QMK4]	ENSPTRT00000027893	1731	2074	+
ENSPTRG00000008013	SRCAP	Snf2-related CREBBP activator protein [Source:HGNC Symbol;Acc:HGNC:16974]	ENSPTRT00000060271	9601	9790	+
ENSPTRG00000016014	SLC30A9	solute carrier family 30 (zinc transporter), member 9 [Source:HGNC Symbol;Acc:HGNC:1329]	ENSPTRT00000046447	1701	2055	+
ENSPTRG00000010127	ATP9B	ATPase, class II, type 9B [Source:HGNC Symbol;Acc:HGNC:13541]	ENSPTRT00000018576	361	680	+
ENSPTRG00000000577	PPIE	Peptidyl-prolyl cis-trans isomerase E [Source:UniProtKB/TrEMBL;Acc:H2PYR1]	ENSPTRT00000001112	1091	1299	+
ENSPTRG00000005095	STAT2	Signal transducer and activator of transcription 2, 113kDa; Uncharacterized protein [Source:UniProtKB/TrEMBL;Acc:H2Q688]	ENSPTRT00000009371	2171	2330	+
ENSPTRG00000020364	HEY1	Uncharacterized protein [Source:UniProtKB/TrEMBL;Acc:H2QWB8]	ENSPTRT00000037700	1001	1236	+
ENSPTRG00000002429	ZNF248	Uncharacterized protein; Zinc finger protein 248 [Source:UniProtKB/TrEMBL;Acc:H2QZG5]	ENSPTRT00000044451	4491	4690	+
ENSPTRG00000014903	P4HTM	Prolyl 4-hydroxylase, transmembrane (Endoplasmic reticulum); Uncharacterized protein [Source:UniProtKB/TrEMBL;Acc:H2QMK5]	ENSPTRT00000027895	1841	2241	+
ENSPTRG00000042406	ZNF25	zinc finger protein 25 [Source:HGNC Symbol;Acc:HGNC:13043]	ENSPTRT00000073079	341	560	+
ENSPTRG00000002437	ZNF33A	zinc finger protein 33A [Source:HGNC Symbol;Acc:HGNC:13096]	ENSPTRT00000004524	581	860	+
ENSPTRG00000020365	MRPS28	Mitochondrial ribosomal protein S28; Uncharacterized protein [Source:UniProtKB/TrEMBL;Acc:H2QWB9]	ENSPTRT00000037701	471	609	+
ENSPTRG00000006949	RPAP1	RNA polymerase II associated protein 1; Uncharacterized protein [Source:UniProtKB/TrEMBL;Acc:H2Q983]	ENSPTRT00000012806	4171	4350	+
ENSPTRG00000020367	TPD52	tumor protein D52 [Source:HGNC Symbol;Acc:HGNC:12005]	ENSPTRT00000037703	820	960	+
ENSPTRG00000010327	KDM4B	lysine (K)-specific demethylase 4B [Source:HGNC Symbol;Acc:HGNC:29136]	ENSPTRT00000018974	3291	3853	+
ENSPTRG00000014905	WDR6	WD repeat domain 6 [Source:HGNC Symbol;Acc:HGNC:12758]	ENSPTRT00000027899	2011	2150	+
ENSPTRG00000008014	PHKG2	Phosphorylase kinase, gamma 2 (Testis); Uncharacterized protein [Source:UniProtKB/TrEMBL;Acc:H2QAY4]	ENSPTRT00000014784	1191	1570	+
ENSPTRG00000005093	IL23A	interleukin 23, alpha subunit p19 [Source:HGNC Symbol;Acc:HGNC:15488]	ENSPTRT00000009369	831	990	+
ENSPTRG00000010133	CTDP1	CTD (carboxy-terminal domain, RNA polymerase II, polypeptide A) phosphatase, subunit 1 [Source:HGNC Symbol;Acc:HGNC:2498]	ENSPTRT00000018587	3241	3440	+
ENSPTRG00000017222	2015-09-08	Uncharacterized protein [Source:UniProtKB/TrEMBL;Acc:H2QRG8]	ENSPTRT00000031890	1461	1560	+
ENSPTRG00000005090	CNPY2	Uncharacterized protein [Source:UniProtKB/TrEMBL;Acc:H2Q685]	ENSPTRT00000009365	1901	2100	+
ENSPTRG00000000579	TRIT1	Uncharacterized protein; tRNA isopentenyltransferase 1 [Source:UniProtKB/TrEMBL;Acc:H2PYR3]	ENSPTRT00000001115	1861	2056	+
ENSPTRG00000014907	NDUFAF3	NADH dehydrogenase (Ubiquinone) 1 alpha subcomplex, assembly factor 3; Uncharacterized protein [Source:UniProtKB/TrEMBL;Acc:H2QMK7]	ENSPTRT00000027905	1071	1177	+
ENSPTRG00000003736	VWCE	von Willebrand factor C and EGF domains [Source:HGNC Symbol;Acc:HGNC:26487]	ENSPTRT00000006969	2371	2620	+
ENSPTRG00000017915	PPP1R11	Pan troglodytes protein phosphatase 1, regulatory (inhibitor) subunit 11 (PPP1R11), mRNA. [Source:RefSeq mRNA;Acc:NM_001071817]	ENSPTRT00000033076	551	720	+
ENSPTRG00000010135	PQLC1	PQ loop repeat containing 1; Uncharacterized protein [Source:UniProtKB/TrEMBL;Acc:H2QER2]	ENSPTRT00000018591	2391	2530	+
ENSPTRG00000002441	BMS1	BMS1 ribosome biogenesis factor [Source:HGNC Symbol;Acc:HGNC:23505]	ENSPTRT00000004533	3931	4438	+
ENSPTRG00000011751	PREB	Prolactin regulatory element binding; Uncharacterized protein [Source:UniProtKB/TrEMBL;Acc:H2QHL6]	ENSPTRT00000021891	2001	2160	+
ENSPTRG00000014908	IMPDH2	Inosine-5'-monophosphate dehydrogenase [Source:UniProtKB/TrEMBL;Acc:H2R178]	ENSPTRT00000027908	621	830	+
ENSPTRG00000009343	PNPO	Pyridoxamine 5'-phosphate oxidase; Uncharacterized protein [Source:UniProtKB/TrEMBL;Acc:H2QDB2]	ENSPTRT00000017158	2931	3170	+
ENSPTRG00000019391	CYP51A1	Cytochrome P450, family 51, subfamily A, polypeptide 1; Uncharacterized protein [Source:UniProtKB/TrEMBL;Acc:H2QUX0]	ENSPTRT00000035893	1521	1720	+
ENSPTRG00000013368	PDRG1	p53 and DNA-damage regulated 1 [Source:HGNC Symbol;Acc:HGNC:16119]	ENSPTRT00000024831	741	930	+
ENSPTRG00000016017	ATP8A1	ATPase, aminophospholipid transporter (APLT), class I, type 8A, member 1 [Source:HGNC Symbol;Acc:HGNC:13531]	ENSPTRT00000029870	6261	6420	+
ENSPTRG00000003737	DDB1	damage-specific DNA binding protein 1, 127kDa [Source:HGNC Symbol;Acc:HGNC:2717]	ENSPTRT00000006972	3901	4040	+
ENSPTRG00000038894	HSBP1L1	heat shock factor binding protein 1-like 1 [Source:HGNC Symbol;Acc:HGNC:37243]	ENSPTRT00000076200	351	520	+
ENSPTRG00000020372	PAG1	Phosphoprotein associated with glycosphingolipid microdomains 1; Uncharacterized protein [Source:UniProtKB/TrEMBL;Acc:H2QWC2]	ENSPTRT00000037710	1661	1760	+
ENSPTRG00000008015	RNF40	ring finger protein 40, E3 ubiquitin protein ligase [Source:HGNC Symbol;Acc:HGNC:16867]	ENSPTRT00000014789	1901	2130	+
ENSPTRG00000005087	COQ10A	Coenzyme Q10 homolog A; Uncharacterized protein [Source:UniProtKB/TrEMBL;Acc:H2Q684]	ENSPTRT00000009360	1151	1430	+
ENSPTRG00000019393	KRIT1	KRIT1, ankyrin repeat containing; Uncharacterized protein [Source:UniProtKB/TrEMBL;Acc:H2QUX1]	ENSPTRT00000035896	2881	3040	+
ENSPTRG00000006953	MGA	MAX gene associated; Uncharacterized protein [Source:UniProtKB/TrEMBL;Acc:H2Q985]	ENSPTRT00000012813	9721	9897	+
ENSPTRG00000003738	DAK	Pan troglodytes dihydroxyacetone kinase 2 homolog (S. cerevisiae) (DAK), mRNA. [Source:RefSeq mRNA;Acc:NM_001246594]	ENSPTRT00000006973	1841	2080	+
ENSPTRG00000023070	QRICH1	Glutamine-rich 1; Uncharacterized protein [Source:UniProtKB/TrEMBL;Acc:H2R0N0]	ENSPTRT00000050522	2741	3110	+
ENSPTRG00000020373	FABP5	fatty acid binding protein 5 (psoriasis-associated) [Source:HGNC Symbol;Acc:HGNC:3560]	ENSPTRT00000037711	51	150	+
ENSPTRG00000010137	RBFA	Uncharacterized protein [Source:UniProtKB/TrEMBL;Acc:H2QER4]	ENSPTRT00000018594	561	962	+
ENSPTRG00000017226	UQCRQ	Ubiquinol-cytochrome c reductase, complex III subunit VII, 9.5kDa; Uncharacterized protein [Source:UniProtKB/TrEMBL;Acc:H2QRH0]	ENSPTRT00000031894	301	427	+
ENSPTRG00000013371	HCK	hemopoietic cell kinase [Source:HGNC Symbol;Acc:HGNC:4840]	ENSPTRT00000024836	241	390	+
ENSPTRG00000002443	CSGALNACT2	chondroitin sulfate N-acetylgalactosaminyltransferase 2 [Source:HGNC Symbol;Acc:HGNC:24292]	ENSPTRT00000004541	1761	2020	+
ENSPTRG00000010138	ADNP2	ADNP homeobox 2; Uncharacterized protein [Source:UniProtKB/TrEMBL;Acc:H2QER5]	ENSPTRT00000018596	3701	3850	+
ENSPTRG00000017228	AFF4	AF4/FMR2 family, member 4; Uncharacterized protein [Source:UniProtKB/TrEMBL;Acc:H2QRH1]	ENSPTRT00000031898	4551	4770	+
ENSPTRG00000011754	SLC5A6	Solute carrier family 5 (Sodium-dependent vitamin transporter), member 6; Uncharacterized protein [Source:UniProtKB/TrEMBL;Acc:H2QHL8]	ENSPTRT00000021894	3021	3153	+
ENSPTRG00000005085	ANKRD52	ankyrin repeat domain 52 [Source:HGNC Symbol;Acc:HGNC:26614]	ENSPTRT00000009357	3001	3170	+
ENSPTRG00000008021	FBXL19	F-box and leucine-rich repeat protein 19 [Source:HGNC Symbol;Acc:HGNC:25300]	ENSPTRT00000014796	151	420	+
ENSPTRG00000014910	QARS	Glutaminyl-tRNA synthetase; Uncharacterized protein [Source:UniProtKB/TrEMBL;Acc:H2QMK8]	ENSPTRT00000027910	2321	2440	+
ENSPTRG00000024332	TRIM26	Pan troglodytes tripartite motif containing 26 (TRIM26), mRNA. [Source:RefSeq mRNA;Acc:NM_001044376]	ENSPTRT00000048788	1711	1880	+
ENSPTRG00000008022	ORAI3	ORAI calcium release-activated calcium modulator 3 [Source:HGNC Symbol;Acc:HGNC:28185]	ENSPTRT00000073801	551	660	+
ENSPTRG00000013372	TM9SF4	Transmembrane 9 superfamily protein member 4; Uncharacterized protein [Source:UniProtKB/TrEMBL;Acc:H2QK60]	ENSPTRT00000024838	3421	3894	+
ENSPTRG00000012574	TANK	TRAF family member-associated NFKB activator; Uncharacterized protein [Source:UniProtKB/TrEMBL;Acc:H2QIV9]	ENSPTRT00000023303	1321	1420	+
ENSPTRG00000014483	SAMM50	Sorting and assembly machinery component 50 homolog; Uncharacterized protein [Source:UniProtKB/TrEMBL;Acc:H2QLV3]	ENSPTRT00000027070	1581	1750	+
ENSPTRG00000009337	MRPL10	mitochondrial ribosomal protein L10 [Source:HGNC Symbol;Acc:HGNC:14055]	ENSPTRT00000017146	647	1007	+
ENSPTRG00000008024	SETD1A	SET domain containing 1A; Uncharacterized protein [Source:UniProtKB/TrEMBL;Acc:H2QAZ0]	ENSPTRT00000014800	1271	1450	+
ENSPTRG00000003741	TMEM216	Pan troglodytes transmembrane protein 216 (TMEM216), mRNA. [Source:RefSeq mRNA;Acc:NM_001242568]	ENSPTRT00000065606	811	1230	+
ENSPTRG00000017923	TRIM39	Pan troglodytes tripartite motif containing 39 (TRIM39), mRNA. [Source:RefSeq mRNA;Acc:NM_001071795]	ENSPTRT00000057537	1821	2160	+
ENSPTRG00000002446	HNRNPF	Pan troglodytes heterogeneous nuclear ribonucleoprotein F (HNRNPF), mRNA. [Source:RefSeq mRNA;Acc:NM_001246537]	ENSPTRT00000004547	181	380	+
ENSPTRG00000000581	MFSD2A	Uncharacterized protein [Source:UniProtKB/TrEMBL;Acc:H2R239]	ENSPTRT00000048933	1821	2127	+
ENSPTRG00000029902			ENSPTRT00000045286	1851	2012	+
ENSPTRG00000005082	RNF41	Ring finger protein 41; Uncharacterized protein [Source:UniProtKB/TrEMBL;Acc:H2Q681]	ENSPTRT00000009352	1071	1417	+
ENSPTRG00000019394	ANKIB1	Ankyrin repeat and IBR domain containing 1; Uncharacterized protein [Source:UniProtKB/TrEMBL;Acc:H2QUX2]	ENSPTRT00000035897	3841	3990	+
ENSPTRG00000011755	ATRAID	all-trans retinoic acid-induced differentiation factor [Source:HGNC Symbol;Acc:HGNC:24090]	ENSPTRT00000021896	971	1120	+
ENSPTRG00000006238	STRN3	Uncharacterized protein [Source:UniProtKB/TrEMBL;Acc:H2R1X9]	ENSPTRT00000044991	2021	2300	+
ENSPTRG00000003742	CPSF7	cleavage and polyadenylation specific factor 7, 59kDa [Source:HGNC Symbol;Acc:HGNC:30098]	ENSPTRT00000006978	2851	3160	+
ENSPTRG00000017229	ZCCHC10	zinc finger, CCHC domain containing 10 [Source:HGNC Symbol;Acc:HGNC:25954]	ENSPTRT00000046282	431	785	+
ENSPTRG00000002448	ZNF32	zinc finger protein 32 [Source:HGNC Symbol;Acc:HGNC:13095]	ENSPTRT00000004559	541	720	+
ENSPTRG00000009336	OSBPL7	oxysterol binding protein-like 7 [Source:HGNC Symbol;Acc:HGNC:16387]	ENSPTRT00000045163	3361	3500	+
ENSPTRG00000006964	EHD4	EH-domain containing 4; Uncharacterized protein [Source:UniProtKB/TrEMBL;Acc:H2Q987]	ENSPTRT00000012842	1571	1982	+
ENSPTRG00000017230	HSPA4	Heat shock 70kDa protein 4; Uncharacterized protein [Source:UniProtKB/TrEMBL;Acc:H2QRH2]	ENSPTRT00000031900	2391	2834	+
ENSPTRG00000005081	SMARCC2	SWI/SNF related, matrix associated, actin dependent regulator of chromatin, subfamily c, member 2 [Source:HGNC Symbol;Acc:HGNC:11105]	ENSPTRT00000009351	3721	3957	+
ENSPTRG00000002452	RASSF4	Ras association (RalGDS/AF-6) domain family member 4 [Source:HGNC Symbol;Acc:HGNC:20793]	ENSPTRT00000004569	2351	2470	+
ENSPTRG00000017912	PATR-E	Pan troglodytes major histocompatibility complex, class I, E (PATR-E), mRNA. [Source:RefSeq mRNA;Acc:NM_001045498]	ENSPTRT00000062050	1651	1770	+
ENSPTRG00000019395	GATAD1	GATA zinc finger domain containing 1 [Source:HGNC Symbol;Acc:HGNC:29941]	ENSPTRT00000035899	961	1272	+
ENSPTRG00000003743	SDHAF2	Pan troglodytes protein phosphatase 1, regulatory subunit 32 (PPP1R32), nuclear gene encoding mitochondrial protein, mRNA. [Source:RefSeq mRNA;Acc:NM_001251854]	ENSPTRT00000006979	321	687	+
ENSPTRG00000006240	HECTD1	HECT domain containing E3 ubiquitin protein ligase 1 [Source:HGNC Symbol;Acc:HGNC:20157]	ENSPTRT00000066178	7133	7490	+
ENSPTRG00000019396	PEX1	Peroxisomal biogenesis factor 1; Uncharacterized protein [Source:UniProtKB/TrEMBL;Acc:H2R566]	ENSPTRT00000055372	701	980	+
ENSPTRG00000013374	PLAGL2	Pleiomorphic adenoma gene-like 2; Uncharacterized protein [Source:UniProtKB/TrEMBL;Acc:H2QK61]	ENSPTRT00000024840	811	1000	+
ENSPTRG00000002193			ENSPTRT00000004022	5861	6361	+
ENSPTRG00000013375	ptr-mir-1825	Pan troglodytes protein O-fucosyltransferase 1 (POFUT1), mRNA. [Source:RefSeq mRNA;Acc:NM_001008982]	ENSPTRT00000024842	4091	4350	+
ENSPTRG00000008031	VKORC1	Pan troglodytes vitamin K epoxide reductase complex subunit 1 (VKORC1), mRNA. [Source:RefSeq mRNA;Acc:NM_001251930]	ENSPTRT00000014815	761	990	+
ENSPTRG00000009333	KPNB1	Uncharacterized protein [Source:UniProtKB/TrEMBL;Acc:H2QDA3]	ENSPTRT00000017140	3846	4146	+
ENSPTRG00000017928	GNL1	Pan troglodytes guanine nucleotide binding protein-like 1 (GNL1), mRNA. [Source:RefSeq mRNA;Acc:NM_001071796]	ENSPTRT00000033100	2971	3210	+
ENSPTRG00000022308	SLC9A6	Sodium/hydrogen exchanger [Source:UniProtKB/TrEMBL;Acc:H2R4I7]	ENSPTRT00000054879	1551	1785	+
ENSPTRG00000014911	USP19	ubiquitin specific peptidase 19 [Source:HGNC Symbol;Acc:HGNC:12617]	ENSPTRT00000027911	1501	1750	+
ENSPTRG00000014480	PARVB	parvin, beta [Source:HGNC Symbol;Acc:HGNC:14653]	ENSPTRT00000066625	1381	1500	+
ENSPTRG00000005079	ESYT1	extended synaptotagmin-like protein 1 [Source:HGNC Symbol;Acc:HGNC:29534]	ENSPTRT00000009343	3581	3720	+
ENSPTRG00000013377	ASXL1	additional sex combs like 1 (Drosophila) [Source:HGNC Symbol;Acc:HGNC:18318]	ENSPTRT00000043057	5211	5320	+
ENSPTRG00000014484	PARVG	parvin, gamma [Source:HGNC Symbol;Acc:HGNC:14654]	ENSPTRT00000027071	282	400	+
ENSPTRG00000022320	ARHGEF6	Rac/Cdc42 guanine nucleotide exchange factor (GEF) 6 [Source:HGNC Symbol;Acc:HGNC:685]	ENSPTRT00000049100	3451	3590	+
ENSPTRG00000000584	PPT1	Palmitoyl-protein thioesterase 1; Uncharacterized protein [Source:UniProtKB/TrEMBL;Acc:H2PYR6]	ENSPTRT00000001122	2351	2469	+
ENSPTRG00000017930	ABCF1	Pan troglodytes ATP-binding cassette, sub-family F (GCN20), member 1 (ABCF1), mRNA. [Source:RefSeq mRNA;Acc:NM_001042379]	ENSPTRT00000033105	2981	3160	+
ENSPTRG00000009330	NPEPPS	aminopeptidase puromycin sensitive [Source:HGNC Symbol;Acc:HGNC:7900]	ENSPTRT00000017137	3991	4145	+
ENSPTRG00000003751	FEN1	Flap endonuclease 1 [Source:UniProtKB/TrEMBL;Acc:H2Q3U7]	ENSPTRT00000006999	881	1270	+
ENSPTRG00000041542	FADS1	Fatty acid desaturase 1; Uncharacterized protein [Source:UniProtKB/TrEMBL;Acc:H2R2R9]	ENSPTRT00000047625	3251	3630	+
ENSPTRG00000024040	NOL4L	nucleolar protein 4-like [Source:HGNC Symbol;Acc:HGNC:16106]	ENSPTRT00000059167	1331	1460	+
ENSPTRG00000011761	MPV17	MpV17 mitochondrial inner membrane protein [Source:HGNC Symbol;Acc:HGNC:7224]	ENSPTRT00000021903	647	990	+
ENSPTRG00000019397	RBM48	RNA binding motif protein 48 [Source:HGNC Symbol;Acc:HGNC:21785]	ENSPTRT00000050615	641	880	+
ENSPTRG00000002462	FAM21A	Uncharacterized protein [Source:UniProtKB/TrEMBL;Acc:H2RCY9]	ENSPTRT00000066467	661	920	+
ENSPTRG00000017234	C5orf15	chromosome 5 open reading frame 15 [Source:HGNC Symbol;Acc:HGNC:20656]	ENSPTRT00000031906	341	798	+
ENSPTRG00000002497	TIMM23	Translocase of inner mitochondrial membrane 23 homolog; Uncharacterized protein [Source:UniProtKB/TrEMBL;Acc:H2Q1W6]	ENSPTRT00000004674	1111	1220	+
ENSPTRG00000011763	GTF3C2	general transcription factor IIIC, polypeptide 2, beta 110kDa [Source:HGNC Symbol;Acc:HGNC:4665]	ENSPTRT00000021905	2211	2390	+
ENSPTRG00000021023	ALDH1A1	Pan troglodytes aldehyde dehydrogenase 1 family, member A1 (ALDH1A1), mRNA. [Source:RefSeq mRNA;Acc:NM_001246547]	ENSPTRT00000038881	1721	1870	+
ENSPTRG00000019400	CDK6	Cyclin-dependent kinase 6; Uncharacterized protein [Source:UniProtKB/TrEMBL;Acc:H2QUX4]	ENSPTRT00000035908	324	510	+
ENSPTRG00000011765	EIF2B4	Translation initiation factor eIF-2B subunit delta; Uncharacterized protein [Source:UniProtKB/TrEMBL;Acc:G2HE47]	ENSPTRT00000021908	57	280	+
ENSPTRG00000008034	KAT8	K(lysine) acetyltransferase 8 [Source:HGNC Symbol;Acc:HGNC:17933]	ENSPTRT00000075743	281	510	+
ENSPTRG00000014488	PRR5	Proline rich 5 (Renal); Uncharacterized protein [Source:UniProtKB/TrEMBL;Acc:H2QLV6]	ENSPTRT00000027076	1281	1440	+
ENSPTRG00000010334	SAFB2	scaffold attachment factor B2 [Source:HGNC Symbol;Acc:HGNC:21605]	ENSPTRT00000018990	1101	1220	+
ENSPTRG00000003753	FADS2	Fatty acid desaturase 2; Uncharacterized protein [Source:UniProtKB/TrEMBL;Acc:H2Q3U8]	ENSPTRT00000007003	141	250	+
ENSPTRG00000006971	VPS39	vacuolar protein sorting 39 homolog (S. cerevisiae) [Source:HGNC Symbol;Acc:HGNC:20593]	ENSPTRT00000012850	4441	4700	+
[truncated: 3,676 more rows]
