# Supplementary material for: Evolution of transcript modification by N6-methyladenosine in primates
Source: HighWire-hosted journal article supplement (doi:10.1101/gr.212563.116), 2017-01-04
Supplement: Supplemental_Table_S6.xlsx [file Supplemental_Table_S6.xlsx]

## Sheet: sTable6.R1Peaks
GID	Symbol	Description	RefSeq_NM	Start	End	Strand
ENSMMUG00000003485	RNMT	RNA (guanine-7-) methyltransferase [Source:HGNC Symbol;Acc:HGNC:10075]	ENSMMUT00000004935	181	450	+
ENSMMUG00000006800	SEH1L	SEH1-like (S. cerevisiae) [Source:HGNC Symbol;Acc:HGNC:30379]	ENSMMUT00000009510	1231	1350	+
ENSMMUG00000021992		Uncharacterized protein [Source:UniProtKB/TrEMBL;Acc:F6RJX6]	ENSMMUT00000030945	741	991	+
ENSMMUG00000021855		Uncharacterized protein [Source:UniProtKB/TrEMBL;Acc:F7EHZ2]	ENSMMUT00000030750	371	620	+
ENSMMUG00000021125	AFG3L2	AFG3-like AAA ATPase 2 [Source:HGNC Symbol;Acc:HGNC:315]	ENSMMUT00000029712	2611	2955	+
ENSMMUG00000010471	IMPA2	Uncharacterized protein [Source:UniProtKB/TrEMBL;Acc:F7BN86]	ENSMMUT00000048294	961	1170	+
ENSMMUG00000000682	NAPG	Gamma-soluble NSF attachment protein; Uncharacterized protein [Source:UniProtKB/TrEMBL;Acc:F6Z0B6]	ENSMMUT00000048292	701	841	+
ENSMMUG00000015014	VAPA	Uncharacterized protein [Source:UniProtKB/TrEMBL;Acc:F6V5Z9]	ENSMMUT00000021047	453	730	+
ENSMMUG00000019525	PPP4R1	protein phosphatase 4, regulatory subunit 1 [Source:HGNC Symbol;Acc:HGNC:9320]	ENSMMUT00000027427	3171	3390	+
ENSMMUG00000010726	TWSG1	Twisted gastrulation protein homolog 1; Twisted gastrulation protein-like protein 1; Uncharacterized protein [Source:UniProtKB/TrEMBL;Acc:F7G4Z4]	ENSMMUT00000015000	1583	1833	+
ENSMMUG00000022005	ZFP161	Uncharacterized protein; Zinc finger protein 161 homolog [Source:UniProtKB/TrEMBL;Acc:F6RIC1]	ENSMMUT00000030966	1351	1635	+
ENSMMUG00000005086	TGIF1	Uncharacterized protein [Source:UniProtKB/TrEMBL;Acc:F7AEU1]	ENSMMUT00000048280	1471	1790	+
ENSMMUG00000019893	MYL12A	Uncharacterized protein [Source:UniProtKB/TrEMBL;Acc:F7AEV1]	ENSMMUT00000027950	801	950	+
ENSMMUG00000005461		Uncharacterized protein [Source:UniProtKB/TrEMBL;Acc:F7AEY8]	ENSMMUT00000007689	3541	4094	+
ENSMMUG00000004046	TYMS	Thymidylate synthase [Source:UniProtKB/TrEMBL;Acc:F6ZR67]	ENSMMUT00000005744	81	200	+
ENSMMUG00000004660	USP14	Ubiquitin carboxyl-terminal hydrolase [Source:UniProtKB/TrEMBL;Acc:F6T5R9]	ENSMMUT00000048273	251	370	+
ENSMMUG00000004656	ROCK1	Rho-associated, coiled-coil containing protein kinase 1 [Source:HGNC Symbol;Acc:HGNC:10251]	ENSMMUT00000006584	2621	2870	+
ENSMMUG00000012987	ESCO1	establishment of sister chromatid cohesion N-acetyltransferase 1 [Source:HGNC Symbol;Acc:HGNC:24645]	ENSMMUT00000011617	3691	3892	+
ENSMMUG00000004382	ABHD3	abhydrolase domain containing 3 [Source:HGNC Symbol;Acc:HGNC:18718]	ENSMMUT00000006223	1225	1530	+
ENSMMUG00000010227	MIB1	Uncharacterized protein [Source:UniProtKB/TrEMBL;Acc:F6S3M0]	ENSMMUT00000014297	1	230	+
ENSMMUG00000021480	C18orf8	chromosome 18 open reading frame 8 [Source:HGNC Symbol;Acc:HGNC:24326]	ENSMMUT00000030239	1261	1480	+
ENSMMUG00000021484	NPC1	Niemann-Pick disease, type C1 [Source:HGNC Symbol;Acc:HGNC:7897]	ENSMMUT00000030245	3721	4234	+
ENSMMUG00000004343	TTC39C	Uncharacterized protein [Source:UniProtKB/TrEMBL;Acc:F6XMC4]	ENSMMUT00000006168	1851	1990	+
ENSMMUG00000032555	PPIA	Peptidyl-prolyl cis-trans isomerase [Source:UniProtKB/TrEMBL;Acc:F7CF53]	ENSMMUT00000048255	350	490	+
ENSMMUG00000018006	TRAPPC8	trafficking protein particle complex 8 [Source:HGNC Symbol;Acc:HGNC:29169]	ENSMMUT00000025301	3041	3230	+
ENSMMUG00000017662	MAPRE2	APC-binding protein EB2; Microtubule-associated protein RP/EB family member 2 isoform 1; Uncharacterized protein [Source:UniProtKB/TrEMBL;Acc:F6UH42]	ENSMMUT00000024831	1071	1340	+
ENSMMUG00000000457	GALNT1	Polypeptide N-acetylgalactosaminyltransferase 1; Uncharacterized protein [Source:UniProtKB/TrEMBL;Acc:F6YR98]	ENSMMUT00000000670	1501	1690	+
ENSMMUG00000018777	RPRD1A	Uncharacterized protein [Source:UniProtKB/TrEMBL;Acc:F6ZTW1]	ENSMMUT00000026403	771	953	+
ENSMMUG00000007514	ZBED1	DREF-like protein; Uncharacterized protein; Zinc finger BED domain-containing protein 1 [Source:UniProtKB/TrEMBL;Acc:F6QDB5]	ENSMMUT00000010509	2451	2640	+
ENSMMUG00000018784	SLC39A6	solute carrier family 39 (zinc transporter), member 6 [Source:HGNC Symbol;Acc:HGNC:18607]	ENSMMUT00000026411	281	730	+
ENSMMUG00000018785	ELP2	elongator acetyltransferase complex subunit 2 [Source:HGNC Symbol;Acc:HGNC:18248]	ENSMMUT00000026419	2311	2520	+
ENSMMUG00000032541		Peptidyl-prolyl cis-trans isomerase [Source:UniProtKB/TrEMBL;Acc:F7CFS5]	ENSMMUT00000048219	380	490	+
ENSMMUG00000023561		Uncharacterized protein [Source:UniProtKB/TrEMBL;Acc:F7HI14]	ENSMMUT00000033141	881	1010	+
ENSMMUG00000006191	TBL1Y	F-box-like/WD repeat-containing protein TBL1Y [Source:RefSeq peptide;Acc:NP_001138540]	ENSMMUT00000008662	731	900	+
ENSMMUG00000008503			ENSMMUT00000011883	721	1180	+
ENSMMUG00000016290	WWC3	WWC family member 3 [Source:HGNC Symbol;Acc:HGNC:29237]	ENSMMUT00000048208	2451	2550	+
ENSMMUG00000002689	MSL3	male-specific lethal 3 homolog (Drosophila) [Source:HGNC Symbol;Acc:HGNC:7370]	ENSMMUT00000003831	791	950	+
ENSMMUG00000007816	SMAD2	Mothers against decapentaplegic homolog 2 isoform 2; Uncharacterized protein [Source:UniProtKB/TrEMBL;Acc:F7CIW0]	ENSMMUT00000010947	1291	1650	+
ENSMMUG00000019410	OFD1	oral-facial-digital syndrome 1 [Source:HGNC Symbol;Acc:HGNC:2567]	ENSMMUT00000048188	3011	3130	+
ENSMMUG00000001760	DYM	dymeclin [Source:HGNC Symbol;Acc:HGNC:21317]	ENSMMUT00000002484	2124	2250	+
ENSMMUG00000018837			ENSMMUT00000026483	408	525	+
ENSMMUG00000013595	GEMIN8	Gem-associated protein 8; Uncharacterized protein [Source:UniProtKB/TrEMBL;Acc:F7CL46]	ENSMMUT00000019083	631	870	+
ENSMMUG00000017842	MOSPD2	motile sperm domain containing 2 [Source:HGNC Symbol;Acc:HGNC:28381]	ENSMMUT00000025075	1691	1858	+
ENSMMUG00000009050	MBD1	Uncharacterized protein [Source:UniProtKB/TrEMBL;Acc:F7CL60]	ENSMMUT00000012652	841	1010	+
ENSMMUG00000009051	CXXC1	CpG-binding protein isoform 2; Uncharacterized protein [Source:UniProtKB/TrEMBL;Acc:F7FBL1]	ENSMMUT00000012656	1651	1843	+
ENSMMUG00000022001	ME2	malic enzyme 2, NAD(+)-dependent, mitochondrial [Source:HGNC Symbol;Acc:HGNC:6984]	ENSMMUT00000030960	891	1120	+
ENSMMUG00000018334	SMAD4	Mothers against decapentaplegic homolog 4; Mothers against decapentaplegic-like protein 4; Uncharacterized protein [Source:UniProtKB/TrEMBL;Acc:F7H894]	ENSMMUT00000025767	781	970	+
ENSMMUG00000023652	MEX3C	mex-3 RNA binding family member C [Source:HGNC Symbol;Acc:HGNC:28040]	ENSMMUT00000033272	1441	1630	+
ENSMMUG00000014054	ZRSR2	Uncharacterized protein [Source:UniProtKB/TrEMBL;Acc:F7AGD2]	ENSMMUT00000019730	1331	1430	+
ENSMMUG00000010157		Uncharacterized protein [Source:UniProtKB/TrEMBL;Acc:F7CL83]	ENSMMUT00000014183	1	110	+
ENSMMUG00000012001	TCF4	transcription factor 4 [Source:HGNC Symbol;Acc:HGNC:11634]	ENSMMUT00000048171	2211	2390	+
ENSMMUG00000012916	WDR7	WD repeat domain 7 [Source:HGNC Symbol;Acc:HGNC:13490]	ENSMMUT00000018117	2901	3000	+
ENSMMUG00000022568	FECH	ferrochelatase [Source:HGNC Symbol;Acc:HGNC:3647]	ENSMMUT00000031752	1421	1590	+
ENSMMUG00000019974	NARS	asparaginyl-tRNA synthetase [Source:HGNC Symbol;Acc:HGNC:7643]	ENSMMUT00000048160	1591	1720	+
ENSMMUG00000006616	NEDD4L	neural precursor cell expressed, developmentally down-regulated 4-like, E3 ubiquitin protein ligase [Source:HGNC Symbol;Acc:HGNC:7728]	ENSMMUT00000009279	2771	3099	+
ENSMMUG00000020513	PHKA2	Uncharacterized protein [Source:UniProtKB/TrEMBL;Acc:F7AXU3]	ENSMMUT00000028871	3921	4370	+
ENSMMUG00000014235	MALT1	Uncharacterized protein [Source:UniProtKB/TrEMBL;Acc:F7D797]	ENSMMUT00000019975	2201	2740	+
ENSMMUG00000014993		Uncharacterized protein [Source:UniProtKB/TrEMBL;Acc:F7AYT8]	ENSMMUT00000021019	1	120	+
ENSMMUG00000017336	PDHA1	Uncharacterized protein [Source:UniProtKB/TrEMBL;Acc:F7AYV7]	ENSMMUT00000024373	1021	1190	+
ENSMMUG00000012622	PMAIP1	Phorbol-12-myristate-13-acetate-induced protein 1; Uncharacterized protein [Source:UniProtKB/TrEMBL;Acc:F7F0V0]	ENSMMUT00000017701	251	580	+
ENSMMUG00000002207		Uncharacterized protein [Source:UniProtKB/TrEMBL;Acc:F6WF47]	ENSMMUT00000003124	1171	1283	+
ENSMMUG00000002209	KIAA1468	KIAA1468 [Source:HGNC Symbol;Acc:HGNC:29289]	ENSMMUT00000003126	3231	3330	+
ENSMMUG00000004434	ZCCHC2	zinc finger, CCHC domain containing 2 [Source:HGNC Symbol;Acc:HGNC:22916]	ENSMMUT00000006285	1991	2752	+
ENSMMUG00000004744	SH3KBP1	SH3-domain kinase binding protein 1 [Source:HGNC Symbol;Acc:HGNC:13867]	ENSMMUT00000006705	2211	2310	+
ENSMMUG00000006578	KDSR	3-ketodihydrosphingosine reductase; Uncharacterized protein [Source:UniProtKB/TrEMBL;Acc:F7HPT5]	ENSMMUT00000009209	1090	1380	+
ENSMMUG00000021184	VPS4B	Suppressor of K(+) transport growth defect 1; Uncharacterized protein; Vacuolar protein sorting-associated protein 4B [Source:UniProtKB/TrEMBL;Acc:F7H6D5]	ENSMMUT00000029805	341	680	+
ENSMMUG00000002134	RPS6KA3	ribosomal protein S6 kinase, 90kDa, polypeptide 3 [Source:HGNC Symbol;Acc:HGNC:10432]	ENSMMUT00000003012	2151	2536	+
ENSMMUG00000022874		Uncharacterized protein [Source:UniProtKB/TrEMBL;Acc:F6WMH1]	ENSMMUT00000032201	441	550	+
ENSMMUG00000017728	TMX3	Protein disulfide-isomerase TMX3; Uncharacterized protein [Source:UniProtKB/TrEMBL;Acc:F7F8A3]	ENSMMUT00000024918	1584	1780	+
ENSMMUG00000009241	CD226	Macaca mulatta CD226 molecule (CD226), mRNA. [Source:RefSeq mRNA;Acc:NM_001042643]	ENSMMUT00000012914	921	1070	+
ENSMMUG00000006979	EIF2S3	Uncharacterized protein [Source:UniProtKB/TrEMBL;Acc:F7DQV0]	ENSMMUT00000009753	2071	2230	+
ENSMMUG00000032499		L-lactate dehydrogenase [Source:UniProtKB/TrEMBL;Acc:F7BCH4]	ENSMMUT00000048116	691	790	+
ENSMMUG00000012819	PDK3	pyruvate dehydrogenase kinase, isozyme 3 [Source:HGNC Symbol;Acc:HGNC:8811]	ENSMMUT00000017985	1111	1210	+
ENSMMUG00000014916	TSHZ1	Serologically defined colon cancer antigen 33; Uncharacterized protein [Source:UniProtKB/TrEMBL;Acc:F6TV51]	ENSMMUT00000020922	3011	3310	+
ENSMMUG00000012710	CXHXORF21	Uncharacterized protein [Source:UniProtKB/TrEMBL;Acc:F7DFI5]	ENSMMUT00000017818	871	1040	+
ENSMMUG00000032487		Uncharacterized protein [Source:UniProtKB/TrEMBL;Acc:F7AAI1]	ENSMMUT00000018790	21	130	+
ENSMMUG00000009151	CTDP1	CTD (carboxy-terminal domain, RNA polymerase II, polypeptide A) phosphatase, subunit 1 [Source:HGNC Symbol;Acc:HGNC:2498]	ENSMMUT00000012797	1571	1720	+
ENSMMUG00000001612	PQLC1	Uncharacterized protein [Source:UniProtKB/TrEMBL;Acc:F7GUX7]	ENSMMUT00000002275	1	120	+
ENSMMUG00000001613	TXNL4A	Thioredoxin-like protein 4A; Uncharacterized protein [Source:UniProtKB/TrEMBL;Acc:F7GUX1]	ENSMMUT00000002279	751	855	+
ENSMMUG00000014855	RBFA	ribosome binding factor A (putative) [Source:HGNC Symbol;Acc:HGNC:26120]	ENSMMUT00000020843	691	1030	+
ENSMMUG00000013710	ADNP2	ADNP homeobox protein 2; Uncharacterized protein; Zinc finger protein 508 [Source:UniProtKB/TrEMBL;Acc:F6S545]	ENSMMUT00000019249	2951	3167	+
ENSMMUG00000012762	ATP6AP2	Renin receptor; Renin/prorenin receptor; Uncharacterized protein [Source:UniProtKB/TrEMBL;Acc:F7EMR9]	ENSMMUT00000017907	1111	1298	+
ENSMMUG00000005263	CXorf38	chromosome X open reading frame 38 [Source:HGNC Symbol;Acc:HGNC:28589]	ENSMMUT00000007407	611	910	+
ENSMMUG00000005264	MED14	Uncharacterized protein [Source:UniProtKB/TrEMBL;Acc:F7BPL6]	ENSMMUT00000007409	4421	4651	+
ENSMMUG00000013753	USP9X	Ubiquitin carboxyl-terminal hydrolase [Source:UniProtKB/TrEMBL;Acc:F6RFN9]	ENSMMUT00000019313	7131	7431	+
ENSMMUG00000017569	DDX3X	Uncharacterized protein [Source:UniProtKB/TrEMBL;Acc:F6WRP9]	ENSMMUT00000024715	1	110	+
ENSMMUG00000032474		Uncharacterized protein [Source:UniProtKB/TrEMBL;Acc:F7BRA6]	ENSMMUT00000048076	1232	1380	+
ENSMMUG00000003317	KDM6A	lysine (K)-specific demethylase 6A [Source:HGNC Symbol;Acc:HGNC:12637]	ENSMMUT00000004692	4621	4740	+
ENSMMUG00000019663	CHST7	Carbohydrate sulfotransferase 7; Uncharacterized protein [Source:UniProtKB/TrEMBL;Acc:F7CNI9]	ENSMMUT00000027623	1631	1970	+
ENSMMUG00000003897	SLC9A7	Sodium/hydrogen exchanger [Source:UniProtKB/TrEMBL;Acc:F7H3I0]	ENSMMUT00000005520	1262	1500	+
ENSMMUG00000032469		Ferritin [Source:UniProtKB/TrEMBL;Acc:F7BRS0]	ENSMMUT00000048066	98	210	+
ENSMMUG00000023016	JADE3	jade family PHD finger 3 [Source:HGNC Symbol;Acc:HGNC:22982]	ENSMMUT00000032388	1841	2350	+
ENSMMUG00000017422	NDUFB11	Uncharacterized protein [Source:UniProtKB/TrEMBL;Acc:F7HPV6]	ENSMMUT00000024503	961	1100	+
ENSMMUG00000017423	RBM10	Uncharacterized protein [Source:UniProtKB/TrEMBL;Acc:F7BRT1]	ENSMMUT00000024508	2871	2980	+
ENSMMUG00000017428	UBA1	ubiquitin-like modifier activating enzyme 1 [Source:HGNC Symbol;Acc:HGNC:12469]	ENSMMUT00000048061	3231	3410	+
ENSMMUG00000014002	CDK16	cyclin-dependent kinase 16 [Source:HGNC Symbol;Acc:HGNC:8749]	ENSMMUT00000019651	1391	1520	+
ENSMMUG00000016608	USP11	Ubiquitin carboxyl-terminal hydrolase [Source:UniProtKB/TrEMBL;Acc:F6TXQ2]	ENSMMUT00000023336	771	950	+
ENSMMUG00000011418	ARAF	v-raf murine sarcoma 3611 viral oncogene homolog [Source:HGNC Symbol;Acc:HGNC:646]	ENSMMUT00000015986	521	720	+
ENSMMUG00000011426	TIMP1	Macaca mulatta TIMP metallopeptidase inhibitor 1 (TIMP1), mRNA. [Source:RefSeq mRNA;Acc:NM_001032939]	ENSMMUT00000015998	761	890	+
ENSMMUG00000032465	CFP	complement factor properdin [Source:HGNC Symbol;Acc:HGNC:8864]	ENSMMUT00000048055	1241	1390	+
ENSMMUG00000019420	ELK1	ELK1, member of ETS oncogene family [Source:HGNC Symbol;Acc:HGNC:3321]	ENSMMUT00000027292	1521	1775	+
ENSMMUG00000018535	UXT	Uncharacterized protein [Source:UniProtKB/TrEMBL;Acc:F7A1Y5]	ENSMMUT00000026060	171	320	+
ENSMMUG00000016975	SLC38A5	solute carrier family 38, member 5 [Source:HGNC Symbol;Acc:HGNC:18070]	ENSMMUT00000023855	1491	1800	+
ENSMMUG00000018894	FTSJ1	Putative ribosomal RNA methyltransferase 1 isoform b; Uncharacterized protein [Source:UniProtKB/TrEMBL;Acc:F7A6V3]	ENSMMUT00000026559	1221	1604	+
ENSMMUG00000018336	EBP	Uncharacterized protein [Source:UniProtKB/TrEMBL;Acc:F7H890]	ENSMMUT00000025769	251	390	+
ENSMMUG00000018335	TBC1D25	Uncharacterized protein [Source:UniProtKB/TrEMBL;Acc:F7CH11]	ENSMMUT00000025768	1271	1500	+
ENSMMUG00000004439		Uncharacterized protein [Source:UniProtKB/TrEMBL;Acc:F7EEK9]	ENSMMUT00000006295	1681	1830	+
ENSMMUG00000015396	WDR13	WD repeat domain 13 [Source:HGNC Symbol;Acc:HGNC:14352]	ENSMMUT00000021585	101	240	+
ENSMMUG00000019767	WAS	Wiskott-Aldrich syndrome [Source:HGNC Symbol;Acc:HGNC:12731]	ENSMMUT00000027786	1	100	+
ENSMMUG00000019768	SUV39H1	Histone-lysine N-methyltransferase SUV39H1; Uncharacterized protein [Source:UniProtKB/TrEMBL;Acc:F6X1Z9]	ENSMMUT00000013170	2561	2720	+
ENSMMUG00000016465	HDAC6	Uncharacterized protein [Source:UniProtKB/TrEMBL;Acc:F7GBE5]	ENSMMUT00000023129	3771	4100	+
ENSMMUG00000004547	TIMM17B	Mitochondrial import inner membrane translocase subunit Tim17-B; Mitochondrial import inner membrane translocase subunit Tim17-B isoform 2; Uncharacterized protein [Source:UniProtKB/TrEMBL;Acc:F6S5R4]	ENSMMUT00000006430	831	940	+
ENSMMUG00000004548	PQBP1	Polyglutamine-binding protein 1; Polyglutamine-binding protein 1 isoform 1; Uncharacterized protein [Source:UniProtKB/TrEMBL;Acc:F6S5L8]	ENSMMUT00000006434	311	589	+
ENSMMUG00000004553	SLC35A2	UDP-galactose translocator isoform a; Uncharacterized protein [Source:UniProtKB/TrEMBL;Acc:F6S505]	ENSMMUT00000048045	1141	1480	+
ENSMMUG00000004557	PIM2	Serine/threonine-protein kinase pim-2; Uncharacterized protein [Source:UniProtKB/TrEMBL;Acc:F6S4X1]	ENSMMUT00000006443	1941	2040	+
ENSMMUG00000023494	TFE3	Transcription factor E3; Uncharacterized protein [Source:UniProtKB/TrEMBL;Acc:F7E2P9]	ENSMMUT00000033057	2061	2240	+
ENSMMUG00000010620	WDR45	Uncharacterized protein [Source:UniProtKB/TrEMBL;Acc:F7BK22]	ENSMMUT00000048038	1508	1730	+
ENSMMUG00000023022	PLP2	Intestinal membrane A4 protein; Proteolipid protein 2; Uncharacterized protein [Source:UniProtKB/TrEMBL;Acc:F6VM49]	ENSMMUT00000032395	531	720	+
ENSMMUG00000023024	PRICKLE3	prickle homolog 3 (Drosophila) [Source:HGNC Symbol;Acc:HGNC:6645]	ENSMMUT00000032398	1751	2018	+
ENSMMUG00000008618	CACNA1F	Uncharacterized protein [Source:UniProtKB/TrEMBL;Acc:F7CMS5]	ENSMMUT00000048033	5258	5440	+
ENSMMUG00000008623	CCDC22	Coiled-coil domain-containing protein 22; Uncharacterized protein [Source:UniProtKB/TrEMBL;Acc:F7FCZ3]	ENSMMUT00000012053	2151	2300	+
ENSMMUG00000020553	KDM5C	Uncharacterized protein [Source:UniProtKB/TrEMBL;Acc:F7CUG7]	ENSMMUT00000028923	3611	3780	+
ENSMMUG00000009296	HSD17B10	Uncharacterized protein [Source:UniProtKB/TrEMBL;Acc:F7CV42]	ENSMMUT00000012994	16	150	+
ENSMMUG00000006362	HUWE1	HECT, UBA and WWE domain containing 1, E3 ubiquitin protein ligase [Source:HGNC Symbol;Acc:HGNC:30892]	ENSMMUT00000008929	13461	13790	+
ENSMMUG00000008751	PHF8	PHD finger protein 8 [Source:HGNC Symbol;Acc:HGNC:20672]	ENSMMUT00000012232	5301	5407	+
ENSMMUG00000008422	TRO	Uncharacterized protein [Source:UniProtKB/TrEMBL;Acc:F6VBW8]	ENSMMUT00000011774	3397	3810	+
ENSMMUG00000008425	PFKFB1	6-phosphofructo-2-kinase/fructose-2, 6-biphosphatase 1; Uncharacterized protein [Source:UniProtKB/TrEMBL;Acc:F6VBV5]	ENSMMUT00000011781	1491	1620	+
ENSMMUG00000008428	APEX2	DNA-(Apurinic or apyrimidinic site) lyase 2; Uncharacterized protein [Source:UniProtKB/TrEMBL;Acc:F6VBU4]	ENSMMUT00000011782	1261	1490	+
ENSMMUG00000002442		Uncharacterized protein [Source:UniProtKB/TrEMBL;Acc:F6PJ83]	ENSMMUT00000003482	691	800	+
ENSMMUG00000011534	MAGEH1	MAGE-H1 antigen; Melanoma-associated antigen H1; Uncharacterized protein [Source:UniProtKB/TrEMBL;Acc:F7BZI8]	ENSMMUT00000016157	711	1050	+
ENSMMUG00000012836	UBQLN2	Protein linking IAP with cytoskeleton 2; Ubiquilin-2; Uncharacterized protein [Source:UniProtKB/TrEMBL;Acc:F6TBT9]	ENSMMUT00000018007	1491	1730	+
ENSMMUG00000016233	ARHGEF9	Uncharacterized protein [Source:UniProtKB/TrEMBL;Acc:F7GHA1]	ENSMMUT00000022809	1141	1301	+
ENSMMUG00000003922	LAS1L	LAS1-like (S. cerevisiae) [Source:HGNC Symbol;Acc:HGNC:25726]	ENSMMUT00000005558	1604	1900	+
ENSMMUG00000015031	EDA2R	Uncharacterized protein [Source:UniProtKB/TrEMBL;Acc:F6TM24]	ENSMMUT00000021072	771	960	+
ENSMMUG00000015291	STARD8	StAR-related lipid transfer (START) domain containing 8 [Source:HGNC Symbol;Acc:HGNC:19161]	ENSMMUT00000047969	3871	4010	+
ENSMMUG00000020965	EFNB1	EPH-related receptor tyrosine kinase ligand 2; Ephrin-B1; Uncharacterized protein [Source:UniProtKB/TrEMBL;Acc:F7H0J3]	ENSMMUT00000029484	1711	1950	+
ENSMMUG00000006416	FAM155B	family with sequence similarity 155, member B [Source:HGNC Symbol;Acc:HGNC:30701]	ENSMMUT00000008996	221	480	+
ENSMMUG00000013929			ENSMMUT00000047964	781	930	+
ENSMMUG00000013948	DLG3	Uncharacterized protein [Source:UniProtKB/TrEMBL;Acc:F6SE42]	ENSMMUT00000047963	4791	4990	+
ENSMMUG00000032428	CXHXORF65	Uncharacterized protein [Source:UniProtKB/TrEMBL;Acc:F6UBR1]	ENSMMUT00000047957	351	544	+
ENSMMUG00000017797	MED12	Uncharacterized protein [Source:UniProtKB/TrEMBL;Acc:F7E1A2]	ENSMMUT00000025014	6302	6570	+
ENSMMUG00000000667	ZMYM3	Uncharacterized protein; Zinc finger MYM-type protein 3 isoform 1 [Source:UniProtKB/TrEMBL;Acc:F6UBU8]	ENSMMUT00000000961	161	680	+
ENSMMUG00000020481	NONO	Non-POU domain-containing octamer-binding protein; Non-POU domain-containing octamer-binding protein isoform 1; Uncharacterized protein [Source:UniProtKB/TrEMBL;Acc:F6UC36]	ENSMMUT00000028825	234	450	+
ENSMMUG00000032425			ENSMMUT00000047947	911	1080	+
ENSMMUG00000015238	OGT	O-linked N-acetylglucosamine (GlcNAc) transferase [Source:HGNC Symbol;Acc:HGNC:8127]	ENSMMUT00000021361	2545	2790	+
ENSMMUG00000003295	RPS4Y2	40S ribosomal protein S4, Y isoform 2 [Source:RefSeq peptide;Acc:NP_001138538]	ENSMMUT00000031304	712	851	+
ENSMMUG00000007592	HDAC8	Uncharacterized protein [Source:UniProtKB/TrEMBL;Acc:F6SKJ5]	ENSMMUT00000047943	188	400	+
ENSMMUG00000007593	PHKA1	Phosphorylase b kinase regulatory subunit alpha, skeletal muscle isoform isoform 2; Uncharacterized protein [Source:UniProtKB/TrEMBL;Acc:F6SK73]	ENSMMUT00000010630	221	320	+
ENSMMUG00000015619	ABCB7	Uncharacterized protein [Source:UniProtKB/TrEMBL;Acc:F6RUB1]	ENSMMUT00000021913	2101	2342	+
ENSMMUG00000021204	UPRT	Uncharacterized protein [Source:UniProtKB/TrEMBL;Acc:F6UIX9]	ENSMMUT00000047936	1	130	+
ENSMMUG00000019569	CXHXORF26	UPF0368 protein Cxorf26; Uncharacterized protein [Source:UniProtKB/TrEMBL;Acc:F7BGP6]	ENSMMUT00000027489	971	1150	+
ENSMMUG00000014407	MAGT1	magnesium transporter 1 [Source:HGNC Symbol;Acc:HGNC:28880]	ENSMMUT00000020218	21	244	+
ENSMMUG00000010763	BRWD3	bromodomain and WD repeat domain containing 3 [Source:HGNC Symbol;Acc:HGNC:17342]	ENSMMUT00000015047	4631	5150	+
ENSMMUG00000016776	CHM	choroideremia (Rab escort protein 1) [Source:HGNC Symbol;Acc:HGNC:1940]	ENSMMUT00000023568	1871	2100	+
ENSMMUG00000000126	PINK1	Serine/threonine-protein kinase PINK1, mitochondrial; Uncharacterized protein [Source:UniProtKB/TrEMBL;Acc:F7H674]	ENSMMUT00000000181	1724	2393	+
ENSMMUG00000004096		Uncharacterized protein [Source:UniProtKB/TrEMBL;Acc:F6ZC17]	ENSMMUT00000005816	276	458	+
ENSMMUG00000013008	CSTF2	Uncharacterized protein [Source:UniProtKB/TrEMBL;Acc:F7HR34]	ENSMMUT00000018243	1331	1510	+
ENSMMUG00000019572	TIMM8A	Mitochondrial import inner membrane translocase subunit Tim8 A isoform 1; Uncharacterized protein [Source:UniProtKB/TrEMBL;Acc:F7BGN5]	ENSMMUT00000027490	111	570	+
ENSMMUG00000019573	BTK	Uncharacterized protein [Source:UniProtKB/TrEMBL;Acc:F6UTT6]	ENSMMUT00000027493	1091	1376	+
ENSMMUG00000019577	GLA	Alpha-galactosidase A; Uncharacterized protein [Source:UniProtKB/TrEMBL;Acc:F7BGG3]	ENSMMUT00000027499	1121	1292	+
ENSMMUG00000019580	HNRPH1	Heterogeneous nuclear ribonucleoprotein H2; Uncharacterized protein [Source:UniProtKB/TrEMBL;Acc:F7BG13]	ENSMMUT00000027500	247	680	+
ENSMMUG00000032394	ARMCX6	armadillo repeat containing, X-linked 6 [Source:HGNC Symbol;Acc:HGNC:26094]	ENSMMUT00000047884	1	344	+
ENSMMUG00000015655	ARMCX3	ARM protein lost in epithelial cancers on chromosome X 3; Armadillo repeat-containing X-linked protein 3; Uncharacterized protein [Source:UniProtKB/TrEMBL;Acc:F6RKR8]	ENSMMUT00000021960	381	837	+
ENSMMUG00000005291	ARMCX5	Uncharacterized protein [Source:UniProtKB/TrEMBL;Acc:F7BBB8]	ENSMMUT00000007443	741	1230	+
ENSMMUG00000004152			ENSMMUT00000005900	311	600	+
ENSMMUG00000004155	BEX2	brain expressed X-linked 2 [Source:HGNC Symbol;Acc:HGNC:30933]	ENSMMUT00000005902	631	770	+
ENSMMUG00000006111		Uncharacterized protein [Source:UniProtKB/TrEMBL;Acc:F7B6E6]	ENSMMUT00000047866	291	922	+
ENSMMUG00000004674	PRPS1	Ribose-phosphate pyrophosphokinase 1 isoform 1; Uncharacterized protein [Source:UniProtKB/TrEMBL;Acc:F6RUH7]	ENSMMUT00000006603	621	813	+
ENSMMUG00000008207	TSC22D3	TSC22 domain family protein 3 isoform 1; Uncharacterized protein [Source:UniProtKB/TrEMBL;Acc:F6WLE5]	ENSMMUT00000047859	1281	1430	+
ENSMMUG00000016981	PSMD10	Uncharacterized protein [Source:UniProtKB/TrEMBL;Acc:F6WLI1]	ENSMMUT00000023864	571	760	+
ENSMMUG00000004188	ACSL4	Uncharacterized protein [Source:UniProtKB/TrEMBL;Acc:F6WSX9]	ENSMMUT00000005948	1941	2237	+
ENSMMUG00000022822	TMEM164	Transmembrane protein 164; Transmembrane protein 164 isoform b; Uncharacterized protein [Source:UniProtKB/TrEMBL;Acc:F6UNP1]	ENSMMUT00000047846	1631	1840	+
ENSMMUG00000019688		Uncharacterized protein [Source:UniProtKB/TrEMBL;Acc:F6WTU5]	ENSMMUT00000027657	421	532	+
ENSMMUG00000017109		Purine nucleoside phosphorylase [Source:UniProtKB/TrEMBL;Acc:F7H566]	ENSMMUT00000024056	31	170	+
ENSMMUG00000011497	WDR44	Uncharacterized protein [Source:UniProtKB/TrEMBL;Acc:F6WUC2]	ENSMMUT00000047830	1551	1690	+
ENSMMUG00000011498	DOCK11	Uncharacterized protein [Source:UniProtKB/TrEMBL;Acc:F6WUE6]	ENSMMUT00000047828	5451	5590	+
ENSMMUG00000022665	CXorf56	chromosome X open reading frame 56 [Source:HGNC Symbol;Acc:HGNC:26239]	ENSMMUT00000031888	491	660	+
ENSMMUG00000022670	NKRF	NF-kappa-B-repressing factor; NF-kappa-B-repressing factor isoform 2; Uncharacterized protein [Source:UniProtKB/TrEMBL;Acc:F7GU34]	ENSMMUT00000031899	2371	2580	+
ENSMMUG00000017669	2015-09-06	Septin-6 isoform D; Uncharacterized protein [Source:UniProtKB/TrEMBL;Acc:F6TJ60]	ENSMMUT00000047822	1161	1511	+
ENSMMUG00000011076	ZBTB33	Transcriptional regulator Kaiso; Uncharacterized protein [Source:UniProtKB/TrEMBL;Acc:F7FX83]	ENSMMUT00000015486	1411	2180	+
ENSMMUG00000009037	CUL4B	cullin 4B [Source:HGNC Symbol;Acc:HGNC:2555]	ENSMMUT00000012636	2961	3210	+
ENSMMUG00000003745	THOC2	Uncharacterized protein [Source:UniProtKB/TrEMBL;Acc:F6RSZ2]	ENSMMUT00000005302	4171	4560	+
ENSMMUG00000020695	SASH3	SAM and SH3 domain containing 3 [Source:HGNC Symbol;Acc:HGNC:15975]	ENSMMUT00000029109	1273	1450	+
ENSMMUG00000020699	ZDHHC9	zinc finger, DHHC-type containing 9 [Source:HGNC Symbol;Acc:HGNC:18475]	ENSMMUT00000029113	1221	1380	+
ENSMMUG00000008389	RBMX2	RNA-binding motif protein, X-linked 2; Uncharacterized protein [Source:UniProtKB/TrEMBL;Acc:F6TRP5]	ENSMMUT00000047799	691	1000	+
ENSMMUG00000003479	FRMD7	FERM domain containing 7 [Source:HGNC Symbol;Acc:HGNC:8079]	ENSMMUT00000047791	1421	1580	+
ENSMMUG00000016588	RAP2C	Ras-related protein Rap-2c; Uncharacterized protein [Source:UniProtKB/TrEMBL;Acc:F6VPD5]	ENSMMUT00000023294	546	1503	+
ENSMMUG00000007997	PHF6	PHD finger protein 6 isoform 1; Uncharacterized protein [Source:UniProtKB/TrEMBL;Acc:F7HLJ3]	ENSMMUT00000011185	1151	1303	+
ENSMMUG00000008303	HPRT1	hypoxanthine phosphoribosyltransferase 1 [Source:HGNC Symbol;Acc:HGNC:5157]	ENSMMUT00000011614	321	600	+
ENSMMUG00000018717	ZNF75D	zinc finger protein 75D [Source:HGNC Symbol;Acc:HGNC:13145]	ENSMMUT00000047779	2571	2700	+
ENSMMUG00000017881	DDX26B	Uncharacterized protein [Source:UniProtKB/TrEMBL;Acc:F7F5N7]	ENSMMUT00000025125	3471	3570	+
ENSMMUG00000002706	MMGT1	membrane magnesium transporter 1 [Source:HGNC Symbol;Acc:HGNC:28100]	ENSMMUT00000003848	2427	2598	+
ENSMMUG00000011271	SLC9A6	Sodium/hydrogen exchanger [Source:UniProtKB/TrEMBL;Acc:F6WNU8]	ENSMMUT00000015764	4121	4385	+
ENSMMUG00000000297	MAP7D3	MAP7 domain containing 3 [Source:HGNC Symbol;Acc:HGNC:25742]	ENSMMUT00000000435	921	1030	+
ENSMMUG00000006450	HTATSF1	Uncharacterized protein [Source:UniProtKB/TrEMBL;Acc:F7HDT6]	ENSMMUT00000009046	1681	1830	+
ENSMMUG00000013768	ARHGEF6	Rac/Cdc42 guanine nucleotide exchange factor (GEF) 6 [Source:HGNC Symbol;Acc:HGNC:685]	ENSMMUT00000019339	2041	2318	+
ENSMMUG00000000671		Uncharacterized protein [Source:UniProtKB/TrEMBL;Acc:F6Z0U3]	ENSMMUT00000000964	1111	1590	+
ENSMMUG00000006801	CXORF40A	Protein CXorf40A isoform a; Uncharacterized protein [Source:UniProtKB/TrEMBL;Acc:F7H1B2]	ENSMMUT00000047744	811	980	+
ENSMMUG00000004633	HMGB3	high mobility group box 3 [Source:HGNC Symbol;Acc:HGNC:5004]	ENSMMUT00000006553	581	680	+
ENSMMUG00000009034	VMA21	Uncharacterized protein; Vacuolar ATPase assembly integral membrane protein VMA21 [Source:UniProtKB/TrEMBL;Acc:F7FG76]	ENSMMUT00000012627	381	536	+
ENSMMUG00000013176	NSDHL	Sterol-4-alpha-carboxylate 3-dehydrogenase, decarboxylating; Uncharacterized protein [Source:UniProtKB/TrEMBL;Acc:F6XR64]	ENSMMUT00000018484	1221	1410	+
ENSMMUG00000013386	ZNF275	Uncharacterized protein [Source:UniProtKB/TrEMBL;Acc:F7AB50]	ENSMMUT00000018779	291	430	+
ENSMMUG00000012739	HAUS7	HAUS augmin-like complex, subunit 7 [Source:HGNC Symbol;Acc:HGNC:32979]	ENSMMUT00000017871	1941	2050	+
ENSMMUG00000011480	FAM58A	Cyclin-related protein FAM58A isoform 1; Uncharacterized protein [Source:UniProtKB/TrEMBL;Acc:F7D906]	ENSMMUT00000016078	806	1305	+
ENSMMUG00000012744	BCAP31	Uncharacterized protein [Source:UniProtKB/TrEMBL;Acc:F7ESN9]	ENSMMUT00000017877	802	1050	+
ENSMMUG00000003372	SRPK3	SRSF protein kinase 3 [Source:HGNC Symbol;Acc:HGNC:11402]	ENSMMUT00000004769	1741	1910	+
ENSMMUG00000003374	IDH3G	isocitrate dehydrogenase 3 (NAD+) gamma [Source:HGNC Symbol;Acc:HGNC:5386]	ENSMMUT00000004770	931	1060	+
ENSMMUG00000003379	L1CAM	Uncharacterized protein [Source:UniProtKB/TrEMBL;Acc:F7FEV5]	ENSMMUT00000004793	3661	3920	+
ENSMMUG00000000323	ARHGAP4	Uncharacterized protein [Source:UniProtKB/TrEMBL;Acc:F6YUI4]	ENSMMUT00000000471	591	750	+
ENSMMUG00000000319	HCFC1	host cell factor C1 [Source:HGNC Symbol;Acc:HGNC:4839]	ENSMMUT00000000463	3991	4560	+
ENSMMUG00000005132	TMEM187	Uncharacterized protein [Source:UniProtKB/TrEMBL;Acc:F7BXH9]	ENSMMUT00000007233	1171	1450	+
ENSMMUG00000018704	MECP2	Uncharacterized protein [Source:UniProtKB/TrEMBL;Acc:F6YIN8]	ENSMMUT00000026295	1307	1714	+
ENSMMUG00000013668	FLNA	Uncharacterized protein [Source:UniProtKB/TrEMBL;Acc:F6YS48]	ENSMMUT00000019204	7061	7220	+
ENSMMUG00000005495	DNASE1L1	Deoxyribonuclease [Source:UniProtKB/TrEMBL;Acc:F7FYN3]	ENSMMUT00000007734	1991	2168	+
ENSMMUG00000005498	TAZ	Tafazzin [Source:UniProtKB/Swiss-Prot;Acc:Q6IV77]	ENSMMUT00000047724	1681	1808	+
ENSMMUG00000005502	GDI1	Rab GDP dissociation inhibitor alpha; Uncharacterized protein [Source:UniProtKB/TrEMBL;Acc:F7FLQ1]	ENSMMUT00000007745	2091	2228	+
ENSMMUG00000005505	FAM50A	family with sequence similarity 50, member A [Source:HGNC Symbol;Acc:HGNC:18786]	ENSMMUT00000007747	251	550	+
ENSMMUG00000009015	UBL4A	Ubiquitin-like protein 4A; Uncharacterized protein [Source:UniProtKB/TrEMBL;Acc:F7FHB2]	ENSMMUT00000012596	1691	1790	+
ENSMMUG00000009012	FAM3A	family with sequence similarity 3, member A [Source:HGNC Symbol;Acc:HGNC:13749]	ENSMMUT00000047720	481	710	+
ENSMMUG00000017409	G6PD	glucose-6-phosphate dehydrogenase [Source:HGNC Symbol;Acc:HGNC:4057]	ENSMMUT00000024487	2191	2330	+
ENSMMUG00000017277	IKBKG	inhibitor of kappa light polypeptide gene enhancer in B-cells, kinase gamma [Source:HGNC Symbol;Acc:HGNC:5961]	ENSMMUT00000047716	1431	1530	+
ENSMMUG00000005768	DKC1	H/ACA ribonucleoprotein complex subunit 4 isoform 1; Uncharacterized protein [Source:UniProtKB/TrEMBL;Acc:F6W1E4]	ENSMMUT00000008100	1461	1820	+
ENSMMUG00000010248	FUNDC2	FUN14 domain-containing protein 2 [Source:UniProtKB/TrEMBL;Acc:F6QM97]	ENSMMUT00000014327	451	570	+
ENSMMUG00000023099	LRPAP1	low density lipoprotein receptor-related protein associated protein 1 [Source:HGNC Symbol;Acc:HGNC:6701]	ENSMMUT00000032498	1161	1360	+
ENSMMUG00000015095	VBP1	Uncharacterized protein [Source:UniProtKB/TrEMBL;Acc:F6WUT9]	ENSMMUT00000021153	231	540	+
ENSMMUG00000009476	F8A1	Factor VIII intron 22 protein [Source:UniProtKB/TrEMBL;Acc:H9F759]	ENSMMUT00000013225	791	960	+
ENSMMUG00000032308		60S ribosome subunit biogenesis protein NIP7 homolog [Source:UniProtKB/TrEMBL;Acc:F7GMN1]	ENSMMUT00000047709	552	736	+
ENSMMUG00000002015	VAMP7	Uncharacterized protein [Source:UniProtKB/TrEMBL;Acc:F6UTB2]	ENSMMUT00000002855	1401	1623	+
ENSMMUG00000002016	IL9R	interleukin 9 receptor [Source:HGNC Symbol;Acc:HGNC:6030]	ENSMMUT00000002856	1181	1420	+
ENSMMUG00000008392	HTT	huntingtin [Source:HGNC Symbol;Acc:HGNC:4851]	ENSMMUT00000011739	13071	13270	+
ENSMMUG00000008383	MFSD10	Uncharacterized protein [Source:UniProtKB/TrEMBL;Acc:F7HMH5]	ENSMMUT00000011722	1	100	+
ENSMMUG00000008379	ADD1	Uncharacterized protein [Source:UniProtKB/TrEMBL;Acc:F7HMH8]	ENSMMUT00000011718	121	220	+
ENSMMUG00000013158	FAM193A	family with sequence similarity 193, member A [Source:HGNC Symbol;Acc:HGNC:16822]	ENSMMUT00000018460	3011	3140	+
ENSMMUG00000007948	RNF4	ring finger protein 4 [Source:HGNC Symbol;Acc:HGNC:10067]	ENSMMUT00000011120	471	570	+
ENSMMUG00000001160	MXD4	Uncharacterized protein [Source:UniProtKB/TrEMBL;Acc:F6RHV5]	ENSMMUT00000001636	3631	3730	+
ENSMMUG00000009943	WHSC1	Uncharacterized protein [Source:UniProtKB/TrEMBL;Acc:F6RJF5]	ENSMMUT00000013882	3111	3280	+
ENSMMUG00000011191	TACC3	transforming, acidic coiled-coil containing protein 3 [Source:HGNC Symbol;Acc:HGNC:11524]	ENSMMUT00000015655	851	1220	+
ENSMMUG00000011190	TMEM129	transmembrane protein 129 [Source:HGNC Symbol;Acc:HGNC:25137]	ENSMMUT00000015651	461	630	+
ENSMMUG00000008357	MAEA	Uncharacterized protein [Source:UniProtKB/TrEMBL;Acc:F7GP35]	ENSMMUT00000011684	1601	1800	+
ENSMMUG00000008323	CTBP1	C-terminal-binding protein 1 isoform 2; Uncharacterized protein [Source:UniProtKB/TrEMBL;Acc:F7GP87]	ENSMMUT00000047694	1585	1860	+
ENSMMUG00000017221	TMEM175	Uncharacterized protein [Source:UniProtKB/TrEMBL;Acc:F7GPA0]	ENSMMUT00000024206	1101	1280	+
ENSMMUG00000016919	GAK	cyclin G associated kinase [Source:HGNC Symbol;Acc:HGNC:4113]	ENSMMUT00000023783	2241	2650	+
ENSMMUG00000015800	NOC2L	nucleolar complex associated 2 homolog (S. cerevisiae) [Source:HGNC Symbol;Acc:HGNC:24517]	ENSMMUT00000047680	2291	2510	+
ENSMMUG00000001817	HES4	hes family bHLH transcription factor 4 [Source:HGNC Symbol;Acc:HGNC:24149]	ENSMMUT00000002557	662	830	+
ENSMMUG00000000838	AGRN	agrin [Source:HGNC Symbol;Acc:HGNC:329]	ENSMMUT00000047676	7061	7210	+
ENSMMUG00000010030	UBE2J2	ubiquitin-conjugating enzyme E2, J2 [Source:HGNC Symbol;Acc:HGNC:19268]	ENSMMUT00000047670	611	820	+
ENSMMUG00000013862	ACAP3	Uncharacterized protein [Source:UniProtKB/TrEMBL;Acc:F6RLI5]	ENSMMUT00000019456	1371	1562	+
ENSMMUG00000013866	CPSF3L	cleavage and polyadenylation specific factor 3-like [Source:HGNC Symbol;Acc:HGNC:26052]	ENSMMUT00000047665	1991	2240	+
ENSMMUG00000013875	GLTPD1	Glycolipid transfer protein domain-containing protein 1; Uncharacterized protein [Source:UniProtKB/TrEMBL;Acc:F6RDA0]	ENSMMUT00000019474	1681	1850	+
ENSMMUG00000006904	CCNL2	cyclin L2 [Source:HGNC Symbol;Acc:HGNC:20570]	ENSMMUT00000009647	2111	2770	+
ENSMMUG00000006905	MRPL20	39S ribosomal protein L20, mitochondrial; Uncharacterized protein [Source:UniProtKB/TrEMBL;Acc:F7EZM8]	ENSMMUT00000009648	421	600	+
ENSMMUG00000001549			ENSMMUT00000047660	361	660	+
ENSMMUG00000001551	SSU72	Uncharacterized protein [Source:UniProtKB/TrEMBL;Acc:F7G552]	ENSMMUT00000002192	451	630	+
ENSMMUG00000012961	MIB2	mindbomb E3 ubiquitin protein ligase 2 [Source:HGNC Symbol;Acc:HGNC:30577]	ENSMMUT00000018174	61	330	+
ENSMMUG00000005578	SLC35E2B	solute carrier family 35, member E2B [Source:HGNC Symbol;Acc:HGNC:33941]	ENSMMUT00000047651	1050	1210	+
ENSMMUG00000010879	NADK	NAD kinase [Source:HGNC Symbol;Acc:HGNC:29831]	ENSMMUT00000015215	567	702	+
ENSMMUG00000001896	GNB1	Guanine nucleotide-binding protein G(I)/G(S)/G(T) subunit beta-1; Uncharacterized protein [Source:UniProtKB/TrEMBL;Acc:F7FXA9]	ENSMMUT00000002674	1171	1367	+
ENSMMUG00000010280	SKI	v-ski avian sarcoma viral oncogene homolog [Source:HGNC Symbol;Acc:HGNC:10896]	ENSMMUT00000014367	581	840	+
ENSMMUG00000012346	RER1	retention in endoplasmic reticulum sorting receptor 1 [Source:HGNC Symbol;Acc:HGNC:30309]	ENSMMUT00000017308	1021	1340	+
ENSMMUG00000014686	PANK4	Pantothenate kinase 4; Uncharacterized protein [Source:UniProtKB/TrEMBL;Acc:F7GTZ5]	ENSMMUT00000020589	2381	2640	+
ENSMMUG00000016329	TNFRSF14	Macaca mulatta tumor necrosis factor receptor superfamily, member 14 (herpesvirus entry mediator) (TNFRSF14), mRNA. [Source:RefSeq mRNA;Acc:NM_001043357]	ENSMMUT00000022931	1161	1402	+
ENSMMUG00000003786	WRAP73	WD repeat containing, antisense to TP73 [Source:HGNC Symbol;Acc:HGNC:12759]	ENSMMUT00000005357	881	1050	+
ENSMMUG00000032284	LRRC47	leucine rich repeat containing 47 [Source:HGNC Symbol;Acc:HGNC:29207]	ENSMMUT00000047630	1581	1730	+
ENSMMUG00000015173	CEP104	centrosomal protein 104kDa [Source:HGNC Symbol;Acc:HGNC:24866]	ENSMMUT00000021276	3041	3260	+
ENSMMUG00000016837	KCNAB2	Uncharacterized protein; Voltage-gated potassium channel subunit beta-2 isoform 1 [Source:UniProtKB/TrEMBL;Acc:F7C3Q4]	ENSMMUT00000047625	1131	1240	+
ENSMMUG00000018350	ICMT	isoprenylcysteine carboxyl methyltransferase [Source:HGNC Symbol;Acc:HGNC:5350]	ENSMMUT00000025788	2011	2240	+
ENSMMUG00000004092	GPR153	Uncharacterized protein [Source:UniProtKB/TrEMBL;Acc:F6ZCU5]	ENSMMUT00000005806	1861	2372	+
ENSMMUG00000004094			ENSMMUT00000005809	1361	1460	+
ENSMMUG00000023681	NOL9	nucleolar protein 9 [Source:HGNC Symbol;Acc:HGNC:26265]	ENSMMUT00000047616	2061	2220	+
ENSMMUG00000032281	ZBTB48	zinc finger and BTB domain containing 48 [Source:HGNC Symbol;Acc:HGNC:4930]	ENSMMUT00000025556	1981	2184	+
ENSMMUG00000018181	KLHL21	Uncharacterized protein [Source:UniProtKB/TrEMBL;Acc:F7EDJ1]	ENSMMUT00000047615	2381	2560	+
ENSMMUG00000009537	PHF13	PHD finger protein 13; Uncharacterized protein [Source:UniProtKB/TrEMBL;Acc:F6YEY8]	ENSMMUT00000013312	1081	1529	+
ENSMMUG00000002047	THAP3	THAP domain containing, apoptosis associated protein 3 [Source:HGNC Symbol;Acc:HGNC:20855]	ENSMMUT00000002898	351	495	+
ENSMMUG00000004686	DNAJC11	Uncharacterized protein [Source:UniProtKB/TrEMBL;Acc:F6RU29]	ENSMMUT00000006619	121	340	+
ENSMMUG00000032279		Uncharacterized protein [Source:UniProtKB/TrEMBL;Acc:F7GDS7]	ENSMMUT00000047611	261	370	+
ENSMMUG00000016546	TNFRSF9	Tumor necrosis factor receptor superfamily member 9; Uncharacterized protein [Source:UniProtKB/TrEMBL;Acc:F6W5G6]	ENSMMUT00000023238	621	760	+
ENSMMUG00000019671	PARK7	Uncharacterized protein [Source:UniProtKB/TrEMBL;Acc:F7CMK7]	ENSMMUT00000027633	471	570	+
ENSMMUG00000021399	RERE	Arginine-glutamic acid dipeptide repeats protein isoform a; Uncharacterized protein [Source:UniProtKB/TrEMBL;Acc:F7GDT6]	ENSMMUT00000047610	5301	5460	+
ENSMMUG00000016307	SLC2A5	Solute carrier family 2, facilitated glucose transporter member 5 isoform 1; Uncharacterized protein [Source:UniProtKB/TrEMBL;Acc:F7GT75]	ENSMMUT00000022903	1821	2070	+
ENSMMUG00000006224	PIK3CD	Uncharacterized protein [Source:UniProtKB/TrEMBL;Acc:F7HLC7]	ENSMMUT00000008706	3031	3180	+
ENSMMUG00000006225	CLSTN1	Calsyntenin-1 isoform 1; Uncharacterized protein [Source:UniProtKB/TrEMBL;Acc:F7HLB8]	ENSMMUT00000008710	3521	3800	+
ENSMMUG00000013292	LZIC	leucine zipper and CTNNBIP1 domain containing [Source:HGNC Symbol;Acc:HGNC:17497]	ENSMMUT00000018661	11	170	+
ENSMMUG00000016296	UBE4B	ubiquitination factor E4B [Source:HGNC Symbol;Acc:HGNC:12500]	ENSMMUT00000022893	4331	4470	+
ENSMMUG00000002171	KIF1B	kinesin family member 1B [Source:HGNC Symbol;Acc:HGNC:16636]	ENSMMUT00000003063	2001	2250	+
ENSMMUG00000032254	DFFA	DNAation factor subunit alpha isoform 2; Uncharacterized protein [Source:UniProtKB/TrEMBL;Acc:F7GIW4]	ENSMMUT00000047581	821	1010	+
ENSMMUG00000019979		Uncharacterized protein [Source:UniProtKB/TrEMBL;Acc:F7FS99]	ENSMMUT00000028081	781	908	+
ENSMMUG00000007456		Uncharacterized protein [Source:UniProtKB/TrEMBL;Acc:F6SW93]	ENSMMUT00000047578	2431	2659	+
ENSMMUG00000019321	SRM	Spermidine synthase; Uncharacterized protein [Source:UniProtKB/TrEMBL;Acc:F6S2N2]	ENSMMUT00000027131	1061	1275	+
ENSMMUG00000019322	EXOSC10	Uncharacterized protein [Source:UniProtKB/TrEMBL;Acc:F6S2J3]	ENSMMUT00000027134	2181	2533	+
ENSMMUG00000019325	MTOR	mechanistic target of rapamycin (serine/threonine kinase) [Source:HGNC Symbol;Acc:HGNC:3942]	ENSMMUT00000027142	7221	7390	+
ENSMMUG00000032252	UBIAD1	UbiA prenyltransferase domain-containing protein 1; Uncharacterized protein [Source:UniProtKB/TrEMBL;Acc:F7GJ37]	ENSMMUT00000047577	1131	1360	+
ENSMMUG00000032251	FBXO44	F-box only protein 44 isoform 1; Uncharacterized protein [Source:UniProtKB/TrEMBL;Acc:F7BAM9]	ENSMMUT00000047576	1791	1890	+
ENSMMUG00000023669	MAD2L2	Uncharacterized protein [Source:UniProtKB/TrEMBL;Acc:F7GJ53]	ENSMMUT00000033295	1601	1710	+
ENSMMUG00000004677	AGTRAP	Type-1 angiotensin II receptor-associated protein isoform a; Uncharacterized protein [Source:UniProtKB/TrEMBL;Acc:F6RUB9]	ENSMMUT00000006609	511	820	+
ENSMMUG00000007828	MTHFR	Methylenetetrahydrofolate reductase [Source:UniProtKB/TrEMBL;Acc:F7CI98]	ENSMMUT00000047571	2141	2310	+
ENSMMUG00000014174		Uncharacterized protein [Source:UniProtKB/TrEMBL;Acc:F7ALL1]	ENSMMUT00000019890	791	950	+
ENSMMUG00000023449	MFN2	mitofusin 2 [Source:HGNC Symbol;Acc:HGNC:16877]	ENSMMUT00000032989	2011	2260	+
ENSMMUG00000008340	TNFRSF8	tumor necrosis factor receptor superfamily, member 8 [Source:HGNC Symbol;Acc:HGNC:11923]	ENSMMUT00000011663	2341	2550	+
ENSMMUG00000021447	TNFRSF1B	Tumor necrosis factor receptor superfamily member 1B; Uncharacterized protein [Source:UniProtKB/TrEMBL;Acc:F7EAE4]	ENSMMUT00000030188	1751	2050	+
ENSMMUG00000032246		Uncharacterized protein [Source:UniProtKB/TrEMBL;Acc:F7GUU4]	ENSMMUT00000047561	1491	1770	+
ENSMMUG00000005681	DHRS3	Short-chain dehydrogenase/reductase 3; Uncharacterized protein [Source:UniProtKB/TrEMBL;Acc:F6U5I2]	ENSMMUT00000007984	1601	1703	+
ENSMMUG00000017040	PRDM2	Uncharacterized protein [Source:UniProtKB/TrEMBL;Acc:F7B9E8]	ENSMMUT00000047558	4531	4720	+
ENSMMUG00000005951	EFHD2	EF-hand domain-containing protein D2; Uncharacterized protein [Source:UniProtKB/TrEMBL;Acc:F6UUX9]	ENSMMUT00000008333	1111	1280	+
ENSMMUG00000016281	PLEKHM2	pleckstrin homology domain containing, family M (with RUN domain) member 2 [Source:HGNC Symbol;Acc:HGNC:29131]	ENSMMUT00000022871	3338	3510	+
ENSMMUG00000008026	SPEN	spen family transcriptional repressor [Source:HGNC Symbol;Acc:HGNC:17575]	ENSMMUT00000011233	11101	11500	+
ENSMMUG00000008031	ZBTB17	Uncharacterized protein [Source:UniProtKB/TrEMBL;Acc:F7FNS0]	ENSMMUT00000011238	2551	2727	+
ENSMMUG00000012733	FBXO42	F-box only protein 42; Uncharacterized protein [Source:UniProtKB/TrEMBL;Acc:F7ETH8]	ENSMMUT00000017856	2041	2480	+
ENSMMUG00000019940	NECAP2	Uncharacterized protein [Source:UniProtKB/TrEMBL;Acc:F7G079]	ENSMMUT00000028017	961	1210	+
ENSMMUG00000001610	ATP13A2	Uncharacterized protein [Source:UniProtKB/TrEMBL;Acc:F7FP50]	ENSMMUT00000002283	3509	3830	+
ENSMMUG00000004751	ALDH4A1	aldehyde dehydrogenase 4 family, member A1 [Source:HGNC Symbol;Acc:HGNC:406]	ENSMMUT00000006715	2561	2750	+
ENSMMUG00000006669	UBR4	ubiquitin protein ligase E3 component n-recognin 4 [Source:HGNC Symbol;Acc:HGNC:30313]	ENSMMUT00000009356	14231	14620	+
ENSMMUG00000006688	EMC1	Uncharacterized protein [Source:UniProtKB/TrEMBL;Acc:F7FSE2]	ENSMMUT00000009373	4101	4200	+
ENSMMUG00000006695	MRTO4	Uncharacterized protein; mRNA turnover protein 4 homolog [Source:UniProtKB/TrEMBL;Acc:F7HJV5]	ENSMMUT00000009376	691	987	+
ENSMMUG00000006892	PQLC2	PQ loop repeat containing 2 [Source:HGNC Symbol;Acc:HGNC:26001]	ENSMMUT00000047524	1681	2040	+
ENSMMUG00000006894	CAPZB	capping protein (actin filament) muscle Z-line, beta [Source:HGNC Symbol;Acc:HGNC:1491]	ENSMMUT00000009634	931	1190	+
ENSMMUG00000006908	MUL1	Mitochondrial ubiquitin ligase activator of NFKB 1; Uncharacterized protein [Source:UniProtKB/TrEMBL;Acc:F7EZL0]	ENSMMUT00000009650	441	760	+
ENSMMUG00000008852	HP1BP3	Uncharacterized protein [Source:UniProtKB/TrEMBL;Acc:F7DYV3]	ENSMMUT00000012381	1591	1760	+
ENSMMUG00000004149	EIF4G3	eukaryotic translation initiation factor 4 gamma, 3 [Source:HGNC Symbol;Acc:HGNC:3298]	ENSMMUT00000013999	1281	1440	+
ENSMMUG00000010942	ECE1	endothelin converting enzyme 1 [Source:HGNC Symbol;Acc:HGNC:3146]	ENSMMUT00000015315	2181	2590	+
ENSMMUG00000017344	USP48	ubiquitin specific peptidase 48 [Source:HGNC Symbol;Acc:HGNC:18533]	ENSMMUT00000024395	1984	2160	+
ENSMMUG00000008057			ENSMMUT00000011270	121	270	+
ENSMMUG00000023382	EPHB2	Uncharacterized protein [Source:UniProtKB/TrEMBL;Acc:F7E3T0]	ENSMMUT00000032896	341	530	+
ENSMMUG00000009773	KDM1A	Uncharacterized protein [Source:UniProtKB/TrEMBL;Acc:F6ZH68]	ENSMMUT00000013655	2821	2986	+
ENSMMUG00000010970	HNRNPR	Uncharacterized protein [Source:UniProtKB/TrEMBL;Acc:F7GDH1]	ENSMMUT00000015348	1811	1990	+
ENSMMUG00000011832	E2F2	E2F transcription factor 2 [Source:HGNC Symbol;Acc:HGNC:3114]	ENSMMUT00000016580	1241	1530	+
ENSMMUG00000005560	ID3	DNA-binding protein inhibitor ID-3; Uncharacterized protein [Source:UniProtKB/TrEMBL;Acc:F7GBM3]	ENSMMUT00000007821	571	840	+
ENSMMUG00000003173	TCEB3	transcription elongation factor B (SIII), polypeptide 3 (110kDa, elongin A) [Source:HGNC Symbol;Acc:HGNC:11620]	ENSMMUT00000004493	2161	2380	+
ENSMMUG00000019554	PITHD1	PITH domain-containing protein 1; Uncharacterized protein [Source:UniProtKB/TrEMBL;Acc:F7CKL5]	ENSMMUT00000027463	651	1040	+
ENSMMUG00000019551	LYPLA2	Uncharacterized protein [Source:UniProtKB/TrEMBL;Acc:F7CKM3]	ENSMMUT00000047497	1591	1690	+
ENSMMUG00000019549	GALE	UDP-glucose 4-epimerase; Uncharacterized protein [Source:UniProtKB/TrEMBL;Acc:F7CKR0]	ENSMMUT00000027457	1011	1200	+
ENSMMUG00000019548	HMGCL	Uncharacterized protein [Source:UniProtKB/TrEMBL;Acc:F7CQT4]	ENSMMUT00000027454	1151	1500	+
ENSMMUG00000004216	FUCA1	fucosidase, alpha-L- 1, tissue [Source:HGNC Symbol;Acc:HGNC:4006]	ENSMMUT00000005987	1246	1400	+
ENSMMUG00000013783	PNRC2	proline-rich nuclear receptor coactivator 2 [Source:HGNC Symbol;Acc:HGNC:23158]	ENSMMUT00000019350	251	724	+
ENSMMUG00000004466	NIPAL3	NIPA-like domain containing 3 [Source:HGNC Symbol;Acc:HGNC:25233]	ENSMMUT00000006327	1531	1810	+
ENSMMUG00000002416	CLIC4	Chloride intracellular channel protein 4; Uncharacterized protein [Source:UniProtKB/TrEMBL;Acc:F6PP70]	ENSMMUT00000003434	3081	3289	+
ENSMMUG00000002420	RUNX3	runt-related transcription factor 3 [Source:HGNC Symbol;Acc:HGNC:10473]	ENSMMUT00000003439	958	1260	+
ENSMMUG00000002970	RSRP1	arginine/serine-rich protein 1 [Source:HGNC Symbol;Acc:HGNC:25234]	ENSMMUT00000004211	421	710	+
ENSMMUG00000032217	TMEM50A	Transmembrane protein 50A; Uncharacterized protein [Source:UniProtKB/TrEMBL;Acc:F7FZH5]	ENSMMUT00000047485	1871	2150	+
ENSMMUG00000023385	LDLRAP1	low density lipoprotein receptor adaptor protein 1 [Source:HGNC Symbol;Acc:HGNC:18640]	ENSMMUT00000032904	1511	1720	+
ENSMMUG00000004788	MAN1C1	mannosidase, alpha, class 1C, member 1 [Source:HGNC Symbol;Acc:HGNC:19080]	ENSMMUT00000006761	1271	1390	+
ENSMMUG00000007854	MTFR1L	mitochondrial fission regulator 1-like [Source:HGNC Symbol;Acc:HGNC:28836]	ENSMMUT00000011001	1231	1660	+
ENSMMUG00000000655	PAFAH2	Uncharacterized protein [Source:UniProtKB/TrEMBL;Acc:F6WZL7]	ENSMMUT00000000944	371	530	+
ENSMMUG00000016874	PDIK1L	PDLIM1 interacting kinase 1 like [Source:HGNC Symbol;Acc:HGNC:18981]	ENSMMUT00000047477	381	680	+
ENSMMUG00000004682	ZNF593	Uncharacterized protein; Zinc finger protein 593 [Source:UniProtKB/TrEMBL;Acc:F6RU82]	ENSMMUT00000006614	415	620	+
ENSMMUG00000000644	CEP85	Centrosomal protein of 85 kDa; Uncharacterized protein [Source:UniProtKB/TrEMBL;Acc:F6XS40]	ENSMMUT00000000928	2261	2510	+
ENSMMUG00000000646	SH3BGRL3	Uncharacterized protein [Source:UniProtKB/TrEMBL;Acc:F6XR95]	ENSMMUT00000000932	1281	1449	+
ENSMMUG00000022426	DHDDS	Uncharacterized protein [Source:UniProtKB/TrEMBL;Acc:F6XBP5]	ENSMMUT00000047465	2961	3174	+
ENSMMUG00000022111	RPS6KA1	ribosomal protein S6 kinase, 90kDa, polypeptide 1 [Source:HGNC Symbol;Acc:HGNC:10430]	ENSMMUT00000031109	2961	3156	+
ENSMMUG00000012697	ARID1A	Uncharacterized protein [Source:UniProtKB/TrEMBL;Acc:F7DX46]	ENSMMUT00000017806	6471	6630	+
ENSMMUG00000012700	PIGV	phosphatidylinositol glycan anchor biosynthesis, class V [Source:HGNC Symbol;Acc:HGNC:26031]	ENSMMUT00000047459	1231	1330	+
ENSMMUG00000013856	ZDHHC18	zinc finger, DHHC-type containing 18 [Source:HGNC Symbol;Acc:HGNC:20712]	ENSMMUT00000019446	831	1120	+
ENSMMUG00000018721	GPN2	GPN-loop GTPase 2; Uncharacterized protein [Source:UniProtKB/TrEMBL;Acc:F6YBW8]	ENSMMUT00000026316	1301	1410	+
ENSMMUG00000018723	GPATCH3	Uncharacterized protein [Source:UniProtKB/TrEMBL;Acc:F6YBV8]	ENSMMUT00000026318	661	840	+
ENSMMUG00000016893	SLC9A1	Sodium/hydrogen exchanger [Source:UniProtKB/TrEMBL;Acc:F7CQM0]	ENSMMUT00000023727	481	580	+
ENSMMUG00000004762	WDTC1	Uncharacterized protein; WD and tetratricopeptide repeats protein 1 [Source:UniProtKB/TrEMBL;Acc:F6SM88]	ENSMMUT00000006729	2261	2570	+
ENSMMUG00000004767	TMEM222	Uncharacterized protein [Source:UniProtKB/TrEMBL;Acc:F6SM64]	ENSMMUT00000047451	601	910	+
ENSMMUG00000004768	SYTL1	synaptotagmin-like 1 [Source:HGNC Symbol;Acc:HGNC:15584]	ENSMMUT00000006734	481	680	+
ENSMMUG00000014434	FGR	Tyrosine-protein kinase Fgr; Uncharacterized protein [Source:UniProtKB/TrEMBL;Acc:F7BHF8]	ENSMMUT00000020255	1891	2110	+
ENSMMUG00000011454	2015-06-16	Macaca mulatta 6-16 protein-like (6-16), mRNA. [Source:RefSeq mRNA;Acc:NM_001048170]	ENSMMUT00000016036	661	810	+
ENSMMUG00000012243	FAM76A	Uncharacterized protein [Source:UniProtKB/TrEMBL;Acc:F6V7A1]	ENSMMUT00000017156	811	980	+
ENSMMUG00000012252	STX12	Uncharacterized protein [Source:UniProtKB/TrEMBL;Acc:F6V089]	ENSMMUT00000047443	621	950	+
ENSMMUG00000006933	PPP1R8	Uncharacterized protein [Source:UniProtKB/TrEMBL;Acc:F7E1S7]	ENSMMUT00000032572	681	1062	+
ENSMMUG00000019993	SESN2	Sestrin-2; Uncharacterized protein [Source:UniProtKB/TrEMBL;Acc:F7FNU6]	ENSMMUT00000028099	2961	3150	+
ENSMMUG00000018338		Uncharacterized protein [Source:UniProtKB/TrEMBL;Acc:F7H672]	ENSMMUT00000025772	711	820	+
ENSMMUG00000011391	YTHDF2	Uncharacterized protein [Source:UniProtKB/TrEMBL;Acc:F6W6I0]	ENSMMUT00000047434	1101	1260	+
ENSMMUG00000011377	EPB41	erythrocyte membrane protein band 4.1 [Source:HGNC Symbol;Acc:HGNC:3377]	ENSMMUT00000015930	1271	1380	+
ENSMMUG00000007110	SRSF4	Serine/arginine-rich splicing factor 4; Uncharacterized protein [Source:UniProtKB/TrEMBL;Acc:F7DYE3]	ENSMMUT00000009922	841	1020	+
ENSMMUG00000015659	MECR	Trans-2-enoyl-CoA reductase, mitochondrial isoform a; Uncharacterized protein [Source:UniProtKB/TrEMBL;Acc:F6RDJ9]	ENSMMUT00000021963	1611	2060	+
ENSMMUG00000008744	LAPTM5	lysosomal protein transmembrane 5 [Source:HGNC Symbol;Acc:HGNC:29612]	ENSMMUT00000012216	1	120	+
ENSMMUG00000013520	PUM1	Pumilio homolog 1 isoform 1; Uncharacterized protein [Source:UniProtKB/TrEMBL;Acc:F6Z785]	ENSMMUT00000018986	3691	3854	+
ENSMMUG00000019406	SNRNP40	U5 small nuclear ribonucleoprotein 40 kDa protein; Uncharacterized protein [Source:UniProtKB/TrEMBL;Acc:F6SV59]	ENSMMUT00000027255	1251	1400	+
ENSMMUG00000023397		Uncharacterized protein [Source:UniProtKB/TrEMBL;Acc:F7FE57]	ENSMMUT00000032920	881	1080	+
ENSMMUG00000012930	PTP4A2	protein tyrosine phosphatase type IVA, member 2 [Source:HGNC Symbol;Acc:HGNC:9635]	ENSMMUT00000018132	1001	1110	+
ENSMMUG00000015650	TMEM39B	Transmembrane protein 39B; Uncharacterized protein [Source:UniProtKB/TrEMBL;Acc:F6RKY8]	ENSMMUT00000021954	1481	1763	+
ENSMMUG00000008455	KPNA6	Uncharacterized protein [Source:UniProtKB/TrEMBL;Acc:F6UVJ8]	ENSMMUT00000047421	3551	3670	+
ENSMMUG00000009948	HDAC1	Histone deacetylase [Source:UniProtKB/TrEMBL;Acc:F6RIU8]	ENSMMUT00000013891	1011	1341	+
ENSMMUG00000009951	MARCKSL1	MARCKS-related protein; Uncharacterized protein [Source:UniProtKB/TrEMBL;Acc:F6RIS3]	ENSMMUT00000013893	641	930	+
ENSMMUG00000001264	BSDC1	Uncharacterized protein [Source:UniProtKB/TrEMBL;Acc:F7CXY4]	ENSMMUT00000047415	881	1173	+
ENSMMUG00000009940	RBBP4	Histone-binding protein RBBP4 isoform a; Uncharacterized protein [Source:UniProtKB/TrEMBL;Acc:F6RJL6]	ENSMMUT00000013878	381	490	+
ENSMMUG00000006282	RNF19B	ring finger protein 19B [Source:HGNC Symbol;Acc:HGNC:26886]	ENSMMUT00000008793	1	210	+
ENSMMUG00000006285	ADC	Uncharacterized protein [Source:UniProtKB/TrEMBL;Acc:F7GQB1]	ENSMMUT00000008798	1731	1910	+
ENSMMUG00000003267	ZNF362	Uncharacterized protein; Zinc finger protein 362 [Source:UniProtKB/TrEMBL;Acc:F7DIM6]	ENSMMUT00000004621	1661	1970	+
ENSMMUG00000003269	PHC2	Uncharacterized protein [Source:UniProtKB/TrEMBL;Acc:F7DIK0]	ENSMMUT00000004629	2543	2850	+
ENSMMUG00000019793	ZMYM4	Uncharacterized protein [Source:UniProtKB/TrEMBL;Acc:F7G1U3]	ENSMMUT00000027829	4591	4770	+
ENSMMUG00000019811		Uncharacterized protein [Source:UniProtKB/TrEMBL;Acc:F7G1B5]	ENSMMUT00000027838	351	466	+
ENSMMUG00000019812	NCDN	Neurochondrin isoform 1; Uncharacterized protein [Source:UniProtKB/TrEMBL;Acc:F7G1A2]	ENSMMUT00000027841	741	870	+
ENSMMUG00000013090	PSMB2	Proteasome subunit beta type [Source:UniProtKB/TrEMBL;Acc:F6XJL9]	ENSMMUT00000018360	1	100	+
ENSMMUG00000006251	AGO1	argonaute RISC catalytic component 1 [Source:HGNC Symbol;Acc:HGNC:3262]	ENSMMUT00000008747	2731	3080	+
ENSMMUG00000022499	TRAPPC3	Trafficking protein particle complex subunit 3; Uncharacterized protein [Source:UniProtKB/TrEMBL;Acc:F7A3R2]	ENSMMUT00000031638	651	848	+
ENSMMUG00000014622	THRAP3	Thyroid hormone receptor-associated protein 3; Uncharacterized protein [Source:UniProtKB/TrEMBL;Acc:F7GNF6]	ENSMMUT00000020506	3101	3240	+
ENSMMUG00000011688			ENSMMUT00000016372	741	880	+
ENSMMUG00000011689	EVA1B	eva-1 homolog B (C. elegans) [Source:HGNC Symbol;Acc:HGNC:25558]	ENSMMUT00000016373	781	890	+
ENSMMUG00000016212	STK40	serine/threonine kinase 40 [Source:HGNC Symbol;Acc:HGNC:21373]	ENSMMUT00000022778	1511	1724	+
ENSMMUG00000010323	ZC3H12A	Uncharacterized protein [Source:UniProtKB/TrEMBL;Acc:F6RGY4]	ENSMMUT00000014442	1151	1490	+
ENSMMUG00000008421	SNIP1	Smad nuclear-interacting protein 1; Uncharacterized protein [Source:UniProtKB/TrEMBL;Acc:F6VCH4]	ENSMMUT00000011771	1031	1190	+
ENSMMUG00000008419	GNL2	guanine nucleotide binding protein-like 2 (nucleolar) [Source:HGNC Symbol;Acc:HGNC:29925]	ENSMMUT00000011769	531	650	+
ENSMMUG00000005372	YRDC	YrdC domain-containing protein, mitochondrial [Source:UniProtKB/TrEMBL;Acc:H9F8J3]	ENSMMUT00000007561	1181	1320	+
ENSMMUG00000023634	RRAGC	Uncharacterized protein [Source:UniProtKB/TrEMBL;Acc:F7H1S0]	ENSMMUT00000033247	2081	2240	+
ENSMMUG00000009562		Uncharacterized protein [Source:UniProtKB/TrEMBL;Acc:F6X516]	ENSMMUT00000013356	1891	2110	+
ENSMMUG00000007497	PABPC4	Polyadenylate-binding protein 4 isoform 3; Uncharacterized protein [Source:UniProtKB/TrEMBL;Acc:F6QKA5]	ENSMMUT00000010491	1461	1780	+
ENSMMUG00000018869	PPIE	Peptidyl-prolyl cis-trans isomerase [Source:UniProtKB/TrEMBL;Acc:F6WZW1]	ENSMMUT00000026526	1001	1272	+
ENSMMUG00000016220	TRIT1	Uncharacterized protein [Source:UniProtKB/TrEMBL;Acc:F7FQY3]	ENSMMUT00000022790	1811	2086	+
ENSMMUG00000016222	TXN	Thioredoxin [Source:UniProtKB/TrEMBL;Acc:F6RHG3]	ENSMMUT00000022794	1	120	+
ENSMMUG00000009188	CAP1	Adenylyl cyclase-associated protein [Source:UniProtKB/TrEMBL;Acc:F7FR05]	ENSMMUT00000012844	971	1140	+
ENSMMUG00000009189	PPT1	Uncharacterized protein [Source:UniProtKB/TrEMBL;Acc:F7HMC2]	ENSMMUT00000012845	44	250	+
ENSMMUG00000032180	RLF	rearranged L-myc fusion [Source:HGNC Symbol;Acc:HGNC:10025]	ENSMMUT00000047364	5271	5460	+
ENSMMUG00000005992	ZMPSTE24	CAAX prenyl protease 1 homolog; Uncharacterized protein [Source:UniProtKB/TrEMBL;Acc:F6UEH3]	ENSMMUT00000008382	1341	1640	+
ENSMMUG00000013839	SMAP2	Stromal membrane-associated protein 2 isoform 1; Uncharacterized protein [Source:UniProtKB/TrEMBL;Acc:F6SYR6]	ENSMMUT00000019423	1189	1410	+
ENSMMUG00000017101	CTPS	CTP synthase [Source:UniProtKB/TrEMBL;Acc:F7H5B5]	ENSMMUT00000024045	2241	2470	+
ENSMMUG00000016215	HIVEP3	Uncharacterized protein [Source:UniProtKB/TrEMBL;Acc:F7FTZ7]	ENSMMUT00000022785	7571	7840	+
ENSMMUG00000014138	FOXJ3	Uncharacterized protein [Source:UniProtKB/TrEMBL;Acc:F7C0R5]	ENSMMUT00000019844	2131	2240	+
ENSMMUG00000013125	RIMKLA	N-acetylaspartyl-glutamate synthetase A; Uncharacterized protein [Source:UniProtKB/TrEMBL;Acc:F6ZGM3]	ENSMMUT00000018413	851	1030	+
ENSMMUG00000013126	PPCS	phosphopantothenoylcysteine synthetase [Source:HGNC Symbol;Acc:HGNC:25686]	ENSMMUT00000018414	1011	1200	+
ENSMMUG00000022068	SLC6A12	Transporter [Source:UniProtKB/TrEMBL;Acc:F7FU70]	ENSMMUT00000031046	1811	1930	+
ENSMMUG00000013653	KDM5A	lysine (K)-specific demethylase 5A [Source:HGNC Symbol;Acc:HGNC:9886]	ENSMMUT00000047342	4821	4930	+
ENSMMUG00000018650	WNK1	WNK lysine deficient protein kinase 1 [Source:HGNC Symbol;Acc:HGNC:14540]	ENSMMUT00000014449	6311	6800	+
ENSMMUG00000022381	LEPRE1	leucine proline-enriched proteoglycan (leprecan) 1 [Source:HGNC Symbol;Acc:HGNC:19316]	ENSMMUT00000031482	2621	2946	+
ENSMMUG00000019440	FBXL14	F-box and leucine-rich repeat protein 14; F-box/LRR-repeat protein 14; Uncharacterized protein [Source:UniProtKB/TrEMBL;Acc:F6R1C1]	ENSMMUT00000027308	961	1130	+
ENSMMUG00000017262	ADIPOR2	Adiponectin receptor protein 2; Progestin and adipoQ receptor family member II; Uncharacterized protein [Source:UniProtKB/TrEMBL;Acc:F7GWW1]	ENSMMUT00000024271	3301	3440	+
ENSMMUG00000016111	C1H1ORF50	Uncharacterized protein; Uncharacterized protein C1orf50 [Source:UniProtKB/TrEMBL;Acc:F7GIR8]	ENSMMUT00000022655	551	740	+
ENSMMUG00000000373	SLC2A1	Solute carrier family 2, facilitated glucose transporter member 1; Uncharacterized protein [Source:UniProtKB/TrEMBL;Acc:F6YFI2]	ENSMMUT00000000538	2011	2266	+
ENSMMUG00000002640	EBNA1BP2	Uncharacterized protein [Source:UniProtKB/TrEMBL;Acc:F7H747]	ENSMMUT00000003764	1001	1159	+
ENSMMUG00000003149	CDC20	Cell division cycle protein 20 homolog; Uncharacterized protein [Source:UniProtKB/TrEMBL;Acc:F7FUI4]	ENSMMUT00000047334	1631	1751	+
ENSMMUG00000019385	FOXM1	forkhead box M1 [Source:HGNC Symbol;Acc:HGNC:3818]	ENSMMUT00000027225	2041	2270	+
ENSMMUG00000004171	RHNO1	Uncharacterized protein [Source:UniProtKB/TrEMBL;Acc:F6XB13]	ENSMMUT00000005924	561	720	+
ENSMMUG00000003152	ELOVL1	Elongation of very long chain fatty acids protein 1; Uncharacterized protein [Source:UniProtKB/TrEMBL;Acc:F7FUS0]	ENSMMUT00000004468	931	1240	+
ENSMMUG00000032172		Uncharacterized protein [Source:UniProtKB/TrEMBL;Acc:F7FUJ1]	ENSMMUT00000047332	301	460	+
ENSMMUG00000023671	MED8	mediator complex subunit 8 [Source:HGNC Symbol;Acc:HGNC:19971]	ENSMMUT00000033305	611	800	+
ENSMMUG00000023674	C1ORF84	Uncharacterized protein [Source:UniProtKB/TrEMBL;Acc:F7FUT6]	ENSMMUT00000033310	7861	8293	+
ENSMMUG00000008546	CCND2	cyclin D2 [Source:HGNC Symbol;Acc:HGNC:1583]	ENSMMUT00000011951	721	860	+
ENSMMUG00000008548	C12orf5	chromosome 12 open reading frame 5 [Source:HGNC Symbol;Acc:HGNC:1185]	ENSMMUT00000011952	711	860	+
ENSMMUG00000015189	RAD51AP1	RAD51 associated protein 1 [Source:HGNC Symbol;Acc:HGNC:16956]	ENSMMUT00000021300	171	270	+
ENSMMUG00000020813		Uncharacterized protein [Source:UniProtKB/TrEMBL;Acc:F7H7P1]	ENSMMUT00000029283	1001	1250	+
ENSMMUG00000012477	PTPRF	protein tyrosine phosphatase, receptor type, F [Source:HGNC Symbol;Acc:HGNC:9670]	ENSMMUT00000016765	2601	2970	+
ENSMMUG00000012479	KDM4A	lysine (K)-specific demethylase 4A [Source:HGNC Symbol;Acc:HGNC:22978]	ENSMMUT00000017497	2841	3160	+
ENSMMUG00000015555	ST3GAL3	Uncharacterized protein [Source:UniProtKB/TrEMBL;Acc:F6Q803]	ENSMMUT00000047317	2111	2340	+
ENSMMUG00000014266	TAPBPL	Tapasin-related protein; Uncharacterized protein [Source:UniProtKB/TrEMBL;Acc:F7BYR4]	ENSMMUT00000047319	731	940	+
ENSMMUG00000000377	TNFRSF1A	tumor necrosis factor receptor superfamily, member 1A [Source:HGNC Symbol;Acc:HGNC:11916]	ENSMMUT00000000541	1491	1600	+
ENSMMUG00000014265	CD27	CD27L receptor; Uncharacterized protein [Source:UniProtKB/TrEMBL;Acc:F7BYS2]	ENSMMUT00000020014	1101	1296	+
ENSMMUG00000014262	VAMP1	Uncharacterized protein; Vesicle-associated membrane protein 1 isoform 2 [Source:UniProtKB/TrEMBL;Acc:F7BYS8]	ENSMMUT00000020013	236	370	+
ENSMMUG00000018677	NCAPD2	Condensin complex subunit 1 [Source:UniProtKB/TrEMBL;Acc:F6ZY62]	ENSMMUT00000026258	4111	4368	+
ENSMMUG00000015142	IPO13	Uncharacterized protein [Source:UniProtKB/TrEMBL;Acc:F6UE53]	ENSMMUT00000021235	591	1490	+
ENSMMUG00000018679	GAPDH	Glyceraldehyde-3-phosphate dehydrogenase; Uncharacterized protein [Source:UniProtKB/TrEMBL;Acc:F6WJJ6]	ENSMMUT00000008204	1171	1340	+
ENSMMUG00000015150	DPH2	DPH2 homolog (S. cerevisiae) [Source:HGNC Symbol;Acc:HGNC:3004]	ENSMMUT00000021242	1517	1750	+
ENSMMUG00000015154	ATP6V0B	Uncharacterized protein; V-type proton ATPase 21 kDa proteolipid subunit isoform 1 [Source:UniProtKB/TrEMBL;Acc:F6UDI5]	ENSMMUT00000047311	1631	1740	+
ENSMMUG00000015155	B4GALT2	UDP-Gal:betaGlcNAc beta 1,4- galactosyltransferase, polypeptide 2 [Source:HGNC Symbol;Acc:HGNC:925]	ENSMMUT00000021248	931	1110	+
ENSMMUG00000018685	CHD4	chromodomain helicase DNA binding protein 4 [Source:HGNC Symbol;Acc:HGNC:1919]	ENSMMUT00000026275	4991	5250	+
ENSMMUG00000015158	SLC6A9	Transporter [Source:UniProtKB/TrEMBL;Acc:F6UD64]	ENSMMUT00000021254	1911	2130	+
ENSMMUG00000011645	DMAP1	Uncharacterized protein [Source:UniProtKB/TrEMBL;Acc:F6PT62]	ENSMMUT00000047308	961	1210	+
ENSMMUG00000016985	ING4	Uncharacterized protein [Source:UniProtKB/TrEMBL;Acc:F7AYZ2]	ENSMMUT00000023867	381	550	+
ENSMMUG00000016990	ZNF384	Uncharacterized protein [Source:UniProtKB/TrEMBL;Acc:F6PRQ4]	ENSMMUT00000023877	1601	1730	+
ENSMMUG00000021929	KIF2C	Uncharacterized protein [Source:UniProtKB/TrEMBL;Acc:F6T486]	ENSMMUT00000047297	481	640	+
ENSMMUG00000005192	USP5	Ubiquitin carboxyl-terminal hydrolase [Source:UniProtKB/TrEMBL;Acc:F7CT78]	ENSMMUT00000007312	2541	2790	+
ENSMMUG00000009443	ENO2	Gamma-enolase; Uncharacterized protein [Source:UniProtKB/TrEMBL;Acc:F6X1V9]	ENSMMUT00000047285	2721	2830	+
ENSMMUG00000010203	PTPN6	protein tyrosine phosphatase, non-receptor type 6 [Source:HGNC Symbol;Acc:HGNC:9658]	ENSMMUT00000014246	1763	1930	+
ENSMMUG00000012993	HECTD3	E3 ubiquitin-protein ligase HECTD3; Uncharacterized protein [Source:UniProtKB/TrEMBL;Acc:F7HR90]	ENSMMUT00000018229	3241	3380	+
ENSMMUG00000010207	EMG1	Nucleolar protein EMG1-like protein; Ribosomal RNA small subunit methyltransferase NEP1; Uncharacterized protein [Source:UniProtKB/TrEMBL;Acc:F6SII9]	ENSMMUT00000014251	727	922	+
ENSMMUG00000010210	LPCAT3	Lysophospholipid acyltransferase 5; Uncharacterized protein [Source:UniProtKB/TrEMBL;Acc:F6SI36]	ENSMMUT00000014255	2121	2270	+
ENSMMUG00000020079	MUTYH	Uncharacterized protein [Source:UniProtKB/TrEMBL;Acc:F7G5B4]	ENSMMUT00000028242	381	560	+
ENSMMUG00000006470	C1R	complement component 1, r subcomponent [Source:HGNC Symbol;Acc:HGNC:1246]	ENSMMUT00000012440	1563	2080	+
ENSMMUG00000008897	C1RL	Uncharacterized protein [Source:UniProtKB/TrEMBL;Acc:F7DNI9]	ENSMMUT00000012442	1071	1454	+
ENSMMUG00000008899	CLSTN3	Alcadein-beta; Calsyntenin-3; Uncharacterized protein [Source:UniProtKB/TrEMBL;Acc:F7DNG4]	ENSMMUT00000047276	3261	3813	+
ENSMMUG00000004242	PEX5	peroxisomal biogenesis factor 5 [Source:HGNC Symbol;Acc:HGNC:9719]	ENSMMUT00000006018	2902	3095	+
ENSMMUG00000019613	EHMT1	euchromatic histone-lysine N-methyltransferase 1 [Source:HGNC Symbol;Acc:HGNC:24650]	ENSMMUT00000027540	441	630	+
ENSMMUG00000020081	TOE1	Uncharacterized protein [Source:UniProtKB/TrEMBL;Acc:F7GPC3]	ENSMMUT00000028245	1551	1860	+
ENSMMUG00000019610	ZMYND19	Uncharacterized protein; Zinc finger MYND domain-containing protein 19 [Source:UniProtKB/TrEMBL;Acc:F7B823]	ENSMMUT00000027535	891	1130	+
ENSMMUG00000006221	PRDX1	Peroxiredoxin-1; Uncharacterized protein [Source:UniProtKB/TrEMBL;Acc:F7HLH7]	ENSMMUT00000008701	811	910	+
ENSMMUG00000019607	PNPLA7	Uncharacterized protein [Source:UniProtKB/TrEMBL;Acc:F7B8I9]	ENSMMUT00000027531	4161	4390	+
ENSMMUG00000000439	SLC2A3	Solute carrier family 2, facilitated glucose transporter member 3; Uncharacterized protein [Source:UniProtKB/TrEMBL;Acc:F7A5T7]	ENSMMUT00000047265	2410	2532	+
ENSMMUG00000019605	NELF	Uncharacterized protein [Source:UniProtKB/TrEMBL;Acc:F7B8J7]	ENSMMUT00000047251	1781	2020	+
ENSMMUG00000015253	NECAP1	Adaptin ear-binding coat-associated protein 1; NECAP endocytosis-associated protein 1; Uncharacterized protein [Source:UniProtKB/TrEMBL;Acc:F7DZS2]	ENSMMUT00000021386	821	1066	+
ENSMMUG00000001960	GPBP1L1	Uncharacterized protein; Vasculin-like protein 1 [Source:UniProtKB/TrEMBL;Acc:F6VH41]	ENSMMUT00000002774	2321	2480	+
ENSMMUG00000015371	MAST2	microtubule associated serine/threonine kinase 2 [Source:HGNC Symbol;Acc:HGNC:19035]	ENSMMUT00000021572	5461	5660	+
ENSMMUG00000019602	NOXA1	Uncharacterized protein [Source:UniProtKB/TrEMBL;Acc:F7B8N9]	ENSMMUT00000027525	1091	1190	+
ENSMMUG00000015078	POMGNT1	Protein O-linked-mannose beta-1,2-N-acetylglucosaminyltransferase 1; Uncharacterized protein [Source:UniProtKB/TrEMBL;Acc:F6WVH8]	ENSMMUT00000047232	3231	3448	+
ENSMMUG00000017846	M6PR	Cation-dependent mannose-6-phosphate receptor; Cation-dependent mannose-6-phosphate receptor isoform 1; Uncharacterized protein [Source:UniProtKB/TrEMBL;Acc:F7DKQ6]	ENSMMUT00000025082	2061	2318	+
ENSMMUG00000018105			ENSMMUT00000025434	1	190	+
ENSMMUG00000032149	LRRC41	leucine rich repeat containing 41 [Source:HGNC Symbol;Acc:HGNC:16917]	ENSMMUT00000047229	971	1089	+
ENSMMUG00000002717	NSUN4	NOP2/Sun domain family, member 4 [Source:HGNC Symbol;Acc:HGNC:31802]	ENSMMUT00000047228	1461	1680	+
ENSMMUG00000001669	ANAPC2	Anaphase-promoting complex subunit 2; Uncharacterized protein [Source:UniProtKB/TrEMBL;Acc:F7G3J3]	ENSMMUT00000002370	271	725	+
ENSMMUG00000002714	FAAH	fatty acid amide hydrolase [Source:HGNC Symbol;Acc:HGNC:3553]	ENSMMUT00000003861	1891	2009	+
ENSMMUG00000008036	MAN1B1	mannosidase, alpha, class 1B, member 1 [Source:HGNC Symbol;Acc:HGNC:6823]	ENSMMUT00000047220	2061	2730	+
ENSMMUG00000004863	ATPAF1	Uncharacterized protein [Source:UniProtKB/TrEMBL;Acc:F7AVF1]	ENSMMUT00000006871	869	1182	+
ENSMMUG00000002144		Uncharacterized protein [Source:UniProtKB/TrEMBL;Acc:F6TLI5]	ENSMMUT00000021087	3741	3930	+
ENSMMUG00000015293	CLEC2D	C-type lectin domain family 2, member D [Source:HGNC Symbol;Acc:HGNC:14351]	ENSMMUT00000021444	1	100	+
ENSMMUG00000017860	NPDC1	neural proliferation, differentiation and control, 1 [Source:HGNC Symbol;Acc:HGNC:7899]	ENSMMUT00000025100	1101	1450	+
ENSMMUG00000021434	ABCA2	Uncharacterized protein [Source:UniProtKB/TrEMBL;Acc:F7EB93]	ENSMMUT00000030167	5711	5970	+
ENSMMUG00000021432	C9ORF142	Uncharacterized protein [Source:UniProtKB/TrEMBL;Acc:F7EEU9]	ENSMMUT00000030165	701	820	+
ENSMMUG00000017375	CMPK1	Uncharacterized protein [Source:UniProtKB/TrEMBL;Acc:F7GRA8]	ENSMMUT00000024433	438	695	+
ENSMMUG00000011528	FBXW5	Uncharacterized protein [Source:UniProtKB/TrEMBL;Acc:F7C048]	ENSMMUT00000016147	1811	2010	+
ENSMMUG00000011527	TRAF2	TNF receptor-associated factor 2; Uncharacterized protein [Source:UniProtKB/TrEMBL;Acc:F7C057]	ENSMMUT00000016145	1591	2030	+
ENSMMUG00000005042	RABL6	Uncharacterized protein [Source:UniProtKB/TrEMBL;Acc:F7AJN9]	ENSMMUT00000047189	2141	2362	+
ENSMMUG00000032138		Uncharacterized protein [Source:UniProtKB/TrEMBL;Acc:F7GRC6]	ENSMMUT00000047192	181	280	+
ENSMMUG00000004651		Uncharacterized protein [Source:UniProtKB/TrEMBL;Acc:F7GSH5]	ENSMMUT00000006578	110	221	+
ENSMMUG00000019056	FAF1	Uncharacterized protein [Source:UniProtKB/TrEMBL;Acc:F6QTM2]	ENSMMUT00000026774	2461	2577	+
ENSMMUG00000019057	CDKN2C	Cyclin-dependent kinase 4 inhibitor C; Uncharacterized protein [Source:UniProtKB/TrEMBL;Acc:F6QTJ3]	ENSMMUT00000026777	2141	2310	+
ENSMMUG00000012112	RNF11	RING finger protein 11; Uncharacterized protein [Source:UniProtKB/TrEMBL;Acc:F7H8S3]	ENSMMUT00000016957	331	650	+
ENSMMUG00000005082	MAGOHB	Uncharacterized protein [Source:UniProtKB/TrEMBL;Acc:F7C459]	ENSMMUT00000007169	171	360	+
ENSMMUG00000012055	EPS15	epidermal growth factor receptor pathway substrate 15 [Source:HGNC Symbol;Acc:HGNC:3419]	ENSMMUT00000016881	2477	2660	+
ENSMMUG00000032136	FAM69B	family with sequence similarity 69, member B [Source:HGNC Symbol;Acc:HGNC:28290]	ENSMMUT00000047182	961	1130	+
ENSMMUG00000020990	AGPAT2	1-acylglycerol-3-phosphate O-acyltransferase 2 [Source:HGNC Symbol;Acc:HGNC:325]	ENSMMUT00000029515	1071	1260	+
ENSMMUG00000019282		Uncharacterized protein [Source:UniProtKB/TrEMBL;Acc:F6SBG9]	ENSMMUT00000027084	96	222	+
ENSMMUG00000026981	mml-mir-126	mml-mir-126 [Source:miRBase;Acc:MI0007616]	ENSMMUT00000036682	1591	1720	+
ENSMMUG00000004735	OSBPL9	oxysterol binding protein-like 9 [Source:HGNC Symbol;Acc:HGNC:16386]	ENSMMUT00000006691	1951	2050	+
ENSMMUG00000017022	NOTCH1	Uncharacterized protein [Source:UniProtKB/TrEMBL;Acc:F6Y5M4]	ENSMMUT00000023931	7281	7610	+
ENSMMUG00000023315	BCL2L14	Uncharacterized protein [Source:UniProtKB/TrEMBL;Acc:F7FAF4]	ENSMMUT00000047171	321	470	+
ENSMMUG00000004738	NRD1	Uncharacterized protein [Source:UniProtKB/TrEMBL;Acc:F6SU75]	ENSMMUT00000006703	3241	3340	+
ENSMMUG00000018578	LOH12CR1	Uncharacterized protein [Source:UniProtKB/TrEMBL;Acc:F6YFS9]	ENSMMUT00000026112	931	1171	+
ENSMMUG00000018580	DUSP16	dual specificity phosphatase 16 [Source:HGNC Symbol;Acc:HGNC:17909]	ENSMMUT00000026116	2141	2260	+
ENSMMUG00000003636		Uncharacterized protein [Source:UniProtKB/TrEMBL;Acc:F6Q5X6]	ENSMMUT00000005151	411	588	+
ENSMMUG00000022370	CDKN1B	Cyclin-dependent kinase inhibitor 1B; Uncharacterized protein [Source:UniProtKB/TrEMBL;Acc:F6Z4R0]	ENSMMUT00000031466	391	960	+
ENSMMUG00000014329	CC2D1B	coiled-coil and C2 domain containing 1B [Source:HGNC Symbol;Acc:HGNC:29386]	ENSMMUT00000020104	531	760	+
ENSMMUG00000017993	DDX47	DEAD (Asp-Glu-Ala-Asp) box polypeptide 47 [Source:HGNC Symbol;Acc:HGNC:18682]	ENSMMUT00000025281	1730	2140	+
ENSMMUG00000003106	SEC16A	SEC16 homolog A (S. cerevisiae) [Source:HGNC Symbol;Acc:HGNC:29006]	ENSMMUT00000004405	2671	2840	+
ENSMMUG00000014330	ORC1	Uncharacterized protein [Source:UniProtKB/TrEMBL;Acc:F7CZ60]	ENSMMUT00000020110	911	1220	+
ENSMMUG00000017023	ZCCHC11	zinc finger, CCHC domain containing 11 [Source:HGNC Symbol;Acc:HGNC:28981]	ENSMMUT00000023933	2111	2280	+
ENSMMUG00000003105	INPP5E	inositol polyphosphate-5-phosphatase, 72 kDa [Source:HGNC Symbol;Acc:HGNC:21474]	ENSMMUT00000004393	1	370	+
ENSMMUG00000003098	PMPCA	Mitochondrial-processing peptidase subunit alpha; Uncharacterized protein [Source:UniProtKB/TrEMBL;Acc:F7DRX8]	ENSMMUT00000004388	1911	2050	+
ENSMMUG00000003086	SNAPC4	small nuclear RNA activating complex, polypeptide 4, 190kDa [Source:HGNC Symbol;Acc:HGNC:11137]	ENSMMUT00000004369	3611	3860	+
ENSMMUG00000003664	ATF7IP	Activating transcription factor 7-interacting protein 1; Uncharacterized protein [Source:UniProtKB/TrEMBL;Acc:F6TC80]	ENSMMUT00000017779	3521	3870	+
ENSMMUG00000003081	GPSM1	Uncharacterized protein [Source:UniProtKB/TrEMBL;Acc:F7DSI4]	ENSMMUT00000004362	1741	1940	+
ENSMMUG00000032120		Peptidyl-prolyl cis-trans isomerase [Source:UniProtKB/TrEMBL;Acc:F6YD24]	ENSMMUT00000047155	383	490	+
ENSMMUG00000004952	SCP2	sterol carrier protein 2 [Source:HGNC Symbol;Acc:HGNC:10606]	ENSMMUT00000006980	1171	1330	+
ENSMMUG00000032119	HIST1H4K	Histone H4 [Source:UniProtKB/TrEMBL;Acc:F7HAP8]	ENSMMUT00000047152	1	100	+
ENSMMUG00000019299	WBP11	Uncharacterized protein; WW domain-binding protein 11 [Source:UniProtKB/TrEMBL;Acc:F6S9X4]	ENSMMUT00000027106	371	490	+
ENSMMUG00000016827	UBAC1	UBA domain containing 1 [Source:HGNC Symbol;Acc:HGNC:30221]	ENSMMUT00000023643	1541	1644	+
ENSMMUG00000016246	CHMP2B	Charged multivesicular body protein 2b; Uncharacterized protein [Source:UniProtKB/TrEMBL;Acc:F7GEL2]	ENSMMUT00000022826	202	690	+
ENSMMUG00000021497	CAMSAP1	calmodulin regulated spectrin-associated protein 1 [Source:HGNC Symbol;Acc:HGNC:19946]	ENSMMUT00000030260	4261	4550	+
ENSMMUG00000007606	CPT2	Carnitine O-palmitoyltransferase 2, mitochondrial; Uncharacterized protein [Source:UniProtKB/TrEMBL;Acc:F6SJN6]	ENSMMUT00000010644	911	1120	+
ENSMMUG00000018032	ARHGDIB	Uncharacterized protein [Source:UniProtKB/TrEMBL;Acc:F7FJ95]	ENSMMUT00000025324	1	120	+
ENSMMUG00000021507	C2H3ORF38	Uncharacterized protein [Source:UniProtKB/TrEMBL;Acc:F7FFW4]	ENSMMUT00000030275	1191	1399	+
ENSMMUG00000007612	LRP8	low density lipoprotein receptor-related protein 8, apolipoprotein e receptor [Source:HGNC Symbol;Acc:HGNC:6700]	ENSMMUT00000010655	2601	2769	+
ENSMMUG00000020334	PROS1	Macaca mulatta protein S (alpha) (PROS1), mRNA. [Source:RefSeq mRNA;Acc:NM_001044726]	ENSMMUT00000028602	2531	2930	+
ENSMMUG00000013307	STRAP	serine/threonine kinase receptor associated protein [Source:HGNC Symbol;Acc:HGNC:30796]	ENSMMUT00000018682	321	530	+
ENSMMUG00000021597	MRPS2	mitochondrial ribosomal protein S2 [Source:HGNC Symbol;Acc:HGNC:14495]	ENSMMUT00000047119	1251	1450	+
ENSMMUG00000003546		Uncharacterized protein [Source:UniProtKB/TrEMBL;Acc:F7EXN3]	ENSMMUT00000005015	2031	2190	+
ENSMMUG00000001413	YIPF1	Yip1 domain family, member 1 [Source:HGNC Symbol;Acc:HGNC:25231]	ENSMMUT00000047118	1411	1800	+
ENSMMUG00000009549	CLDND1	Uncharacterized protein [Source:UniProtKB/TrEMBL;Acc:F6Y8C4]	ENSMMUT00000013325	1081	1200	+
ENSMMUG00000010833	CPOX	coproporphyrinogen oxidase [Source:HGNC Symbol;Acc:HGNC:2321]	ENSMMUT00000015150	1351	1530	+
ENSMMUG00000007182	LRRC42	leucine rich repeat containing 42 [Source:HGNC Symbol;Acc:HGNC:28792]	ENSMMUT00000047109	1591	1850	+
ENSMMUG00000008183	RXRA	retinoid X receptor, alpha [Source:HGNC Symbol;Acc:HGNC:10477]	ENSMMUT00000011436	601	730	+
ENSMMUG00000007183	TMEM59	Transmembrane protein 59; Uncharacterized protein [Source:UniProtKB/TrEMBL;Acc:F6YT92]	ENSMMUT00000047102	227	380	+
ENSMMUG00000014159		Uncharacterized protein; WD repeat-containing protein 5 [Source:UniProtKB/TrEMBL;Acc:F7AMK0]	ENSMMUT00000019871	971	1250	+
ENSMMUG00000005463	BRD3	Bromodomain-containing protein 3; Uncharacterized protein [Source:UniProtKB/TrEMBL;Acc:F6YTC0]	ENSMMUT00000047098	2551	2710	+
ENSMMUG00000002939	C3ORF26	Uncharacterized protein [Source:UniProtKB/TrEMBL;Acc:F7GZZ0]	ENSMMUT00000004168	61	260	+
ENSMMUG00000017214	VAV2	vav 2 guanine nucleotide exchange factor [Source:HGNC Symbol;Acc:HGNC:12658]	ENSMMUT00000024200	3011	3110	+
ENSMMUG00000020026	TBC1D23	TBC1 domain family member 23 isoform 2; Uncharacterized protein [Source:UniProtKB/TrEMBL;Acc:F7GGM6]	ENSMMUT00000028144	2309	2450	+
ENSMMUG00000020025	TOMM70A	Mitochondrial import receptor subunit TOM70; Uncharacterized protein [Source:UniProtKB/TrEMBL;Acc:F7GGN2]	ENSMMUT00000028143	2191	2420	+
ENSMMUG00000013680	FAM151A	family with sequence similarity 151, member A [Source:HGNC Symbol;Acc:HGNC:25032]	ENSMMUT00000019212	1486	1716	+
ENSMMUG00000002861	TMEM45A	Transmembrane protein 45A; Uncharacterized protein [Source:UniProtKB/TrEMBL;Acc:F6YZ93]	ENSMMUT00000047091	491	660	+
ENSMMUG00000006754	TTC4	Uncharacterized protein [Source:UniProtKB/TrEMBL;Acc:F6QZ42]	ENSMMUT00000009453	1741	1870	+
ENSMMUG00000002863	TFG	Protein TFG isoform 1; Uncharacterized protein [Source:UniProtKB/TrEMBL;Acc:F7HHW2]	ENSMMUT00000004055	981	1440	+
ENSMMUG00000010857	RECQL	RecQ helicase-like [Source:HGNC Symbol;Acc:HGNC:9948]	ENSMMUT00000015186	2081	2212	+
ENSMMUG00000010859	GOLT1B	Golgi transport 1-like protein B; Uncharacterized protein [Source:UniProtKB/TrEMBL;Acc:F7G341]	ENSMMUT00000015189	601	880	+
ENSMMUG00000010981	SLC2A6	solute carrier family 2 (facilitated glucose transporter), member 6 [Source:HGNC Symbol;Acc:HGNC:11011]	ENSMMUT00000015361	1	190	+
ENSMMUG00000032084	PARS2	Uncharacterized protein [Source:UniProtKB/TrEMBL;Acc:F6YZE4]	ENSMMUT00000047084	351	490	+
ENSMMUG00000000937	ADAMTS13	ADAM metallopeptidase with thrombospondin type 1 motif, 13 [Source:HGNC Symbol;Acc:HGNC:1366]	ENSMMUT00000001339	4041	4470	+
ENSMMUG00000021577	DHCR24	Delta(24)-sterol reductase; Uncharacterized protein [Source:UniProtKB/TrEMBL;Acc:F7ECX2]	ENSMMUT00000030362	1451	1550	+
ENSMMUG00000020808	CMAS	Uncharacterized protein [Source:UniProtKB/TrEMBL;Acc:F7H7Q0]	ENSMMUT00000029276	21	200	+
ENSMMUG00000022348	SURF4	Uncharacterized protein [Source:UniProtKB/TrEMBL;Acc:F6Z001]	ENSMMUT00000031440	1711	1890	+
ENSMMUG00000022344	SURF1	Surfeit locus protein 1; Uncharacterized protein [Source:UniProtKB/TrEMBL;Acc:F6ZCK1]	ENSMMUT00000031436	851	1000	+
ENSMMUG00000017782	PCNP	PEST proteolytic signal-containing nuclear protein; Uncharacterized protein [Source:UniProtKB/TrEMBL;Acc:F6R4G2]	ENSMMUT00000021994	2126	2240	+
ENSMMUG00000015060	ZBTB11	Uncharacterized protein [Source:UniProtKB/TrEMBL;Acc:F6TKM4]	ENSMMUT00000021107	2751	3210	+
ENSMMUG00000022340	MED22	Mediator of RNA polymerase II transcription subunit 22 isoform b; Uncharacterized protein [Source:UniProtKB/TrEMBL;Acc:F6ZDB0]	ENSMMUT00000031429	31	160	+
ENSMMUG00000015059		Uncharacterized protein [Source:UniProtKB/TrEMBL;Acc:F6TKN9]	ENSMMUT00000021105	301	430	+
ENSMMUG00000006643	ETNK1	ethanolamine kinase 1 [Source:HGNC Symbol;Acc:HGNC:24649]	ENSMMUT00000009297	1	256	+
ENSMMUG00000021567	FAM55C	Putative uncharacterized protein FAM55C; Uncharacterized protein [Source:UniProtKB/TrEMBL;Acc:F7EDF4]	ENSMMUT00000030349	471	570	+
ENSMMUG00000021568	NFKBIZ	Uncharacterized protein [Source:UniProtKB/TrEMBL;Acc:F7A0S0]	ENSMMUT00000030353	921	1110	+
ENSMMUG00000009107	ALCAM	activated leukocyte cell adhesion molecule [Source:HGNC Symbol;Acc:HGNC:400]	ENSMMUT00000012743	4401	4500	+
ENSMMUG00000015274	RALGDS	ral guanine nucleotide dissociation stimulator [Source:HGNC Symbol;Acc:HGNC:9842]	ENSMMUT00000021415	2281	2890	+
ENSMMUG00000007565	CBLB	Uncharacterized protein [Source:UniProtKB/TrEMBL;Acc:F6T053]	ENSMMUT00000010578	2921	3476	+
ENSMMUG00000008787	BBX	bobby sox homolog (Drosophila) [Source:HGNC Symbol;Acc:HGNC:14422]	ENSMMUT00000012279	1991	2193	+
ENSMMUG00000007050			ENSMMUT00000009848	841	947	+
ENSMMUG00000023128	ITPR2	inositol 1,4,5-trisphosphate receptor, type 2 [Source:HGNC Symbol;Acc:HGNC:6181]	ENSMMUT00000047039	8091	8616	+
ENSMMUG00000008791	CD47	Uncharacterized protein [Source:UniProtKB/TrEMBL;Acc:F7A7Y5]	ENSMMUT00000012287	321	605	+
ENSMMUG00000006466	ASUN	asunder spermatogenesis regulator [Source:HGNC Symbol;Acc:HGNC:20174]	ENSMMUT00000009071	1951	2225	+
ENSMMUG00000003217	TM7SF3	transmembrane 7 superfamily member 3 [Source:HGNC Symbol;Acc:HGNC:23049]	ENSMMUT00000004558	2431	2620	+
ENSMMUG00000003218	MED21	Mediator of RNA polymerase II transcription subunit 21; Uncharacterized protein [Source:UniProtKB/TrEMBL;Acc:F7EAW2]	ENSMMUT00000004559	361	574	+
ENSMMUG00000023248	STK38L	Serine/threonine-protein kinase 38-like protein; Uncharacterized protein [Source:UniProtKB/TrEMBL;Acc:F7E684]	ENSMMUT00000032696	1222	1982	+
ENSMMUG00000004590	DDX31	DEAD (Asp-Glu-Ala-Asp) box polypeptide 31 [Source:HGNC Symbol;Acc:HGNC:16715]	ENSMMUT00000047029	521	740	+
ENSMMUG00000018468	SETX	senataxin [Source:HGNC Symbol;Acc:HGNC:445]	ENSMMUT00000025962	8111	8260	+
ENSMMUG00000001727	MED27	Uncharacterized protein [Source:UniProtKB/TrEMBL;Acc:F7GN95]	ENSMMUT00000002437	921	1240	+
ENSMMUG00000021741	MRPS35	28S ribosomal protein S35, mitochondrial isoform 1; Uncharacterized protein [Source:UniProtKB/TrEMBL;Acc:F7DXV5]	ENSMMUT00000030596	761	890	+
ENSMMUG00000000386	ATG4C	Cysteine protease ATG4C isoform 8; Uncharacterized protein [Source:UniProtKB/TrEMBL;Acc:F6X5Z7]	ENSMMUT00000000560	481	710	+
ENSMMUG00000006479	RAPGEF1	Rap guanine nucleotide exchange factor (GEF) 1 [Source:HGNC Symbol;Acc:HGNC:4568]	ENSMMUT00000047017	3131	3280	+
ENSMMUG00000010531	PTHLH	Uncharacterized protein [Source:UniProtKB/TrEMBL;Acc:F7D665]	ENSMMUT00000014736	411	593	+
ENSMMUG00000011802	CCDC91	coiled-coil domain containing 91 [Source:HGNC Symbol;Acc:HGNC:24855]	ENSMMUT00000047019	961	1730	+
ENSMMUG00000020046	ALG6	ALG6, alpha-1,3-glucosyltransferase [Source:HGNC Symbol;Acc:HGNC:23157]	ENSMMUT00000047018	1741	1890	+
ENSMMUG00000020047	ITGB3BP	Centromere protein R isoform 2; Uncharacterized protein [Source:UniProtKB/TrEMBL;Acc:F7GD31]	ENSMMUT00000028183	351	510	+
ENSMMUG00000009976	UCK1	Uridine kinase [Source:UniProtKB/TrEMBL;Acc:F6R3B0]	ENSMMUT00000013932	921	1320	+
ENSMMUG00000000696	ABHD10	Abhydrolase domain-containing protein 10, mitochondrial; Uncharacterized protein [Source:UniProtKB/TrEMBL;Acc:F6YZH0]	ENSMMUT00000000999	711	960	+
ENSMMUG00000009975	POMT1	protein-O-mannosyltransferase 1 [Source:HGNC Symbol;Acc:HGNC:9202]	ENSMMUT00000013930	2203	3005	+
ENSMMUG00000016068	TMPRSS7	Uncharacterized protein [Source:UniProtKB/TrEMBL;Acc:F7GPG5]	ENSMMUT00000022600	1581	1709	+
ENSMMUG00000016073	GCSAM	germinal center-associated, signaling and motility [Source:HGNC Symbol;Acc:HGNC:20253]	ENSMMUT00000022603	1371	1500	+
ENSMMUG00000020049	PGM1	Uncharacterized protein [Source:UniProtKB/TrEMBL;Acc:F7G9X6]	ENSMMUT00000028186	1901	2200	+
ENSMMUG00000015817	TMTC1	Uncharacterized protein [Source:UniProtKB/TrEMBL;Acc:F7AG29]	ENSMMUT00000022217	2681	3020	+
ENSMMUG00000009973	PRRC2B	proline-rich coiled-coil 2B [Source:HGNC Symbol;Acc:HGNC:28121]	ENSMMUT00000013924	1761	1900	+
ENSMMUG00000001361	IPO8	Importin-8; Importin-8 isoform 1; Uncharacterized protein [Source:UniProtKB/TrEMBL;Acc:F7D6M8]	ENSMMUT00000001925	3131	3373	+
ENSMMUG00000014232	ATG3	Autophagy-related protein 3 [Source:UniProtKB/TrEMBL;Acc:F7D7B0]	ENSMMUT00000019973	651	810	+
ENSMMUG00000001359	CAPRIN2	Uncharacterized protein [Source:UniProtKB/TrEMBL;Acc:F6Y0D5]	ENSMMUT00000046991	3721	3890	+
ENSMMUG00000021278	FAM78A	Putative uncharacterized protein FAM78A; Uncharacterized protein [Source:UniProtKB/TrEMBL;Acc:F6VF69]	ENSMMUT00000029937	1641	1775	+
ENSMMUG00000021724	NUP214	nucleoporin 214kDa [Source:HGNC Symbol;Acc:HGNC:8064]	ENSMMUT00000030575	5091	5270	+
ENSMMUG00000014236	SLC35A5	Putative UDP-sugar transporter protein SLC35A5; Uncharacterized protein [Source:UniProtKB/TrEMBL;Acc:F7D791]	ENSMMUT00000019977	1381	1570	+
ENSMMUG00000018566	JAK1	Tyrosine-protein kinase [Source:UniProtKB/TrEMBL;Acc:F6YLX1]	ENSMMUT00000026100	1021	1220	+
ENSMMUG00000001079	AK4	adenylate kinase 4 [Source:HGNC Symbol;Acc:HGNC:363]	ENSMMUT00000001530	551	670	+
ENSMMUG00000003199	CD200R1	Uncharacterized protein [Source:UniProtKB/TrEMBL;Acc:F7EF72]	ENSMMUT00000004532	1211	1370	+
ENSMMUG00000009155	FAM60A	Family with sequence similarity 60, member A; Uncharacterized protein [Source:UniProtKB/TrEMBL;Acc:F7HRP9]	ENSMMUT00000012801	681	790	+
ENSMMUG00000003221	DENND5B	DENN/MADD domain containing 5B [Source:HGNC Symbol;Acc:HGNC:28338]	ENSMMUT00000004564	1361	1730	+
ENSMMUG00000003264	LEPROT	Uncharacterized protein [Source:UniProtKB/TrEMBL;Acc:F7DIZ5]	ENSMMUT00000004615	51	170	+
ENSMMUG00000014876	C3orf17	chromosome 3 open reading frame 17 [Source:HGNC Symbol;Acc:HGNC:24496]	ENSMMUT00000020871	1401	1700	+
ENSMMUG00000012498	EXOSC2	exosome component 2 [Source:HGNC Symbol;Acc:HGNC:17097]	ENSMMUT00000017529	801	1050	+
ENSMMUG00000008249	FUBP3	far upstream element (FUSE) binding protein 3 [Source:HGNC Symbol;Acc:HGNC:4005]	ENSMMUT00000011531	701	820	+
ENSMMUG00000007490	PDE4B	Uncharacterized protein [Source:UniProtKB/TrEMBL;Acc:F6QKG3]	ENSMMUT00000010490	1556	2289	+
ENSMMUG00000013655	DNM1L	Dynamin-1-like protein isoform 3; Uncharacterized protein [Source:UniProtKB/TrEMBL;Acc:F7GI50]	ENSMMUT00000046968	2561	2670	+
ENSMMUG00000004200	GPR107	G protein-coupled receptor 107 [Source:HGNC Symbol;Acc:HGNC:17830]	ENSMMUT00000005969	1691	2030	+
ENSMMUG00000003797	USP20	ubiquitin specific peptidase 20 [Source:HGNC Symbol;Acc:HGNC:12619]	ENSMMUT00000005374	3791	4000	+
ENSMMUG00000020740	ATP6V1A	Uncharacterized protein; V-type proton ATPase catalytic subunit A [Source:UniProtKB/TrEMBL;Acc:F7HT50]	ENSMMUT00000029171	1741	1840	+
ENSMMUG00000001943	GRAMD1C	GRAM domain containing 1C [Source:HGNC Symbol;Acc:HGNC:25252]	ENSMMUT00000002752	2265	2490	+
ENSMMUG00000001214	ALG10B	Alpha-1,2-glucosyltransferase ALG10-A; Uncharacterized protein [Source:UniProtKB/TrEMBL;Acc:F7DA70]	ENSMMUT00000001718	834	1100	+
ENSMMUG00000003793	TOR1B	torsin family 1, member B (torsin B) [Source:HGNC Symbol;Acc:HGNC:11995]	ENSMMUT00000005366	821	990	+
ENSMMUG00000000645	SLC35D1	UDP-glucuronic acid/UDP-N-acetylgalactosamine transporter; Uncharacterized protein [Source:UniProtKB/TrEMBL;Acc:F6XS30]	ENSMMUT00000000931	981	1269	+
ENSMMUG00000011816	ASB6	Uncharacterized protein [Source:UniProtKB/TrEMBL;Acc:F7H7C0]	ENSMMUT00000016551	1381	1820	+
ENSMMUG00000020640	TIGIT	T cell immunoreceptor with Ig and ITIM domains [Source:HGNC Symbol;Acc:HGNC:26838]	ENSMMUT00000029037	3361	3589	+
ENSMMUG00000006057	METTL11A	Alpha N-terminal protein methyltransferase 1A; Uncharacterized protein [Source:UniProtKB/TrEMBL;Acc:F7HMB4]	ENSMMUT00000046949	751	971	+
ENSMMUG00000010443		Non-histone chromosomal protein HMG-17; Uncharacterized protein [Source:UniProtKB/TrEMBL;Acc:F7FJE3]	ENSMMUT00000014609	61	364	+
ENSMMUG00000011767	CRAT	Uncharacterized protein [Source:UniProtKB/TrEMBL;Acc:F7HQL2]	ENSMMUT00000016494	2571	2670	+
ENSMMUG00000000651	IL12RB2	interleukin 12 receptor, beta 2 [Source:HGNC Symbol;Acc:HGNC:5972]	ENSMMUT00000000941	2391	2590	+
ENSMMUG00000000652	SERBP1	Uncharacterized protein [Source:UniProtKB/TrEMBL;Acc:F6WZG6]	ENSMMUT00000000947	802	1088	+
ENSMMUG00000015857	LRRK2	Uncharacterized protein [Source:UniProtKB/TrEMBL;Acc:F7C7Z0]	ENSMMUT00000022280	4031	4130	+
ENSMMUG00000011765	FAM73B	family with sequence similarity 73, member B [Source:HGNC Symbol;Acc:HGNC:23621]	ENSMMUT00000016488	1651	1770	+
ENSMMUG00000012010	TMEM39A	Transmembrane protein 39A; Uncharacterized protein [Source:UniProtKB/TrEMBL;Acc:F7H043]	ENSMMUT00000016822	1671	1885	+
ENSMMUG00000032029		Uncharacterized protein [Source:UniProtKB/TrEMBL;Acc:F7C7E8]	ENSMMUT00000022286	1	110	+
ENSMMUG00000014808	GADD45A	Growth arrest and DNA damage-inducible protein GADD45 alpha isoform 1; Uncharacterized protein [Source:UniProtKB/TrEMBL;Acc:F6W540]	ENSMMUT00000020772	891	1202	+
ENSMMUG00000012012	POGLUT1	Uncharacterized protein [Source:UniProtKB/TrEMBL;Acc:F7GYD9]	ENSMMUT00000016828	3141	3250	+
ENSMMUG00000011757	NUP188	nucleoporin 188kDa [Source:HGNC Symbol;Acc:HGNC:17859]	ENSMMUT00000016474	3171	3400	+
ENSMMUG00000012014	TIMMDC1	translocase of inner mitochondrial membrane domain containing 1 [Source:HGNC Symbol;Acc:HGNC:1321]	ENSMMUT00000016830	911	1150	+
ENSMMUG00000017799	LRRC8A	Leucine-rich repeat-containing protein 8A; Uncharacterized protein [Source:UniProtKB/TrEMBL;Acc:F7E1A8]	ENSMMUT00000025013	2471	2830	+
ENSMMUG00000021848	CCBL1	Uncharacterized protein [Source:UniProtKB/TrEMBL;Acc:F7EI81]	ENSMMUT00000046922	931	1160	+
ENSMMUG00000016367	CD80	Macaca mulatta CD80 molecule (CD80), mRNA. [Source:RefSeq mRNA;Acc:NM_001042642]	ENSMMUT00000046924	1361	1540	+
ENSMMUG00000000900	ADPRH	Uncharacterized protein; [Protein ADP-ribosylarginine] hydrolase [Source:UniProtKB/TrEMBL;Acc:F6REF0]	ENSMMUT00000001286	3301	3414	+
ENSMMUG00000032024		Uncharacterized protein [Source:UniProtKB/TrEMBL;Acc:F7HRH0]	ENSMMUT00000046918	8	226	+
ENSMMUG00000010865	GXYLT1	glucoside xylosyltransferase 1 [Source:HGNC Symbol;Acc:HGNC:27482]	ENSMMUT00000046915	1871	1990	+
ENSMMUG00000010868	YAF2	Uncharacterized protein [Source:UniProtKB/TrEMBL;Acc:F7G033]	ENSMMUT00000046913	161	550	+
ENSMMUG00000010870	ZER1	Protein zer-1 homolog; Uncharacterized protein [Source:UniProtKB/TrEMBL;Acc:F7G019]	ENSMMUT00000015203	2671	2895	+
ENSMMUG00000010146	ZDHHC12	zinc finger, DHHC-type containing 12 [Source:HGNC Symbol;Acc:HGNC:19159]	ENSMMUT00000046910	681	860	+
ENSMMUG00000021921	LRRC40	Leucine-rich repeat-containing protein 40; Uncharacterized protein [Source:UniProtKB/TrEMBL;Acc:F6T4T3]	ENSMMUT00000030839	1701	1910	+
ENSMMUG00000013852	SRSF11	Serine/arginine-rich splicing factor 11 isoform 1; Uncharacterized protein [Source:UniProtKB/TrEMBL;Acc:F7HTJ5]	ENSMMUT00000046903	437	1344	+
ENSMMUG00000009333	WDR34	WD repeat domain 34 [Source:HGNC Symbol;Acc:HGNC:28296]	ENSMMUT00000013045	1301	1509	+
ENSMMUG00000001980	GSK3B	glycogen synthase kinase 3 beta [Source:HGNC Symbol;Acc:HGNC:4617]	ENSMMUT00000002798	231	380	+
ENSMMUG00000013853	ANKRD13C	ankyrin repeat domain 13C [Source:HGNC Symbol;Acc:HGNC:25374]	ENSMMUT00000046901	1471	1694	+
ENSMMUG00000000075	LRRC58	Uncharacterized protein [Source:UniProtKB/TrEMBL;Acc:F7HJX5]	ENSMMUT00000000106	1101	1360	+
ENSMMUG00000002925	FSTL1	Follistatin-related protein 1; Uncharacterized protein [Source:UniProtKB/TrEMBL;Acc:F7H1Q5]	ENSMMUT00000004149	781	920	+
ENSMMUG00000001594	RABL3	Rab-like protein 3; Uncharacterized protein [Source:UniProtKB/TrEMBL;Acc:F7GV36]	ENSMMUT00000002254	2	120	+
ENSMMUG00000005989	GLE1	Nucleoporin GLE1 isoform 1; Uncharacterized protein [Source:UniProtKB/TrEMBL;Acc:F6UEL7]	ENSMMUT00000008376	2715	2870	+
ENSMMUG00000017312	ZRANB2	Uncharacterized protein; Zinc finger Ran-binding domain-containing protein 2 isoform 2 [Source:UniProtKB/TrEMBL;Acc:F7HS64]	ENSMMUT00000024335	951	1080	+
ENSMMUG00000005987	ODF2	outer dense fiber of sperm tails 2 [Source:HGNC Symbol;Acc:HGNC:8114]	ENSMMUT00000046888	2121	2220	+
ENSMMUG00000023334			ENSMMUT00000032824	741	840	+
ENSMMUG00000001045	IQCB1	Uncharacterized protein [Source:UniProtKB/TrEMBL;Acc:F6QNF6]	ENSMMUT00000001492	1691	2000	+
ENSMMUG00000011811	ANO6	Anoctamin [Source:UniProtKB/TrEMBL;Acc:F7GVV8]	ENSMMUT00000046884	4111	4260	+
ENSMMUG00000032020	CERCAM	cerebral endothelial cell adhesion molecule [Source:HGNC Symbol;Acc:HGNC:23723]	ENSMMUT00000046883	1921	2272	+
ENSMMUG00000015962	ARID2	Uncharacterized protein [Source:UniProtKB/TrEMBL;Acc:F6XWD2]	ENSMMUT00000022445	5561	5720	+
ENSMMUG00000014593	CRYZ	Quinone oxidoreductase isoform a; Uncharacterized protein [Source:UniProtKB/TrEMBL;Acc:F7GW27]	ENSMMUT00000046878	691	830	+
ENSMMUG00000014148	SLC27A4	solute carrier family 27 (fatty acid transporter), member 4 [Source:HGNC Symbol;Acc:HGNC:10998]	ENSMMUT00000019859	1941	2240	+
ENSMMUG00000014146	TRUB2	TruB pseudouridine (psi) synthase family member 2 [Source:HGNC Symbol;Acc:HGNC:17170]	ENSMMUT00000019856	1331	1580	+
ENSMMUG00000023791	SCAF11	SR-related CTD-associated factor 11 [Source:HGNC Symbol;Acc:HGNC:10784]	ENSMMUT00000046876	3601	3760	+
ENSMMUG00000011999	SLC38A1	Sodium-coupled neutral amino acid transporter 1; Uncharacterized protein [Source:UniProtKB/TrEMBL;Acc:F7GW54]	ENSMMUT00000046870	2679	2790	+
ENSMMUG00000022359	SLC38A2	Amino acid transporter A2; Sodium-coupled neutral amino acid transporter 2; Uncharacterized protein [Source:UniProtKB/TrEMBL;Acc:F6Z5M8]	ENSMMUT00000031455	165	630	+
ENSMMUG00000016379	KPNA1	Importin subunit alpha [Source:UniProtKB/TrEMBL;Acc:F7G2W5]	ENSMMUT00000022995	2051	2230	+
ENSMMUG00000020217	PIGK	GPI-anchor transamidase; Uncharacterized protein [Source:UniProtKB/TrEMBL;Acc:F6V958]	ENSMMUT00000028442	991	1190	+
ENSMMUG00000020547	PARP15	poly (ADP-ribose) polymerase family, member 15 [Source:HGNC Symbol;Acc:HGNC:26876]	ENSMMUT00000046861	1781	1990	+
ENSMMUG00000013712	CIZ1	CDKN1A interacting zinc finger protein 1 [Source:HGNC Symbol;Acc:HGNC:16744]	ENSMMUT00000019255	981	1100	+
ENSMMUG00000022569	PARP14	Uncharacterized protein [Source:UniProtKB/TrEMBL;Acc:F6ZKI8]	ENSMMUT00000031754	3841	4090	+
ENSMMUG00000020200		Uncharacterized protein [Source:UniProtKB/TrEMBL;Acc:F7BLV1]	ENSMMUT00000028420	492	675	+
ENSMMUG00000022572	HSPBAP1	HSPB (heat shock 27kDa) associated protein 1 [Source:HGNC Symbol;Acc:HGNC:16389]	ENSMMUT00000031757	1111	1599	+
ENSMMUG00000020219	ZZZ3	zinc finger, ZZ-type containing 3 [Source:HGNC Symbol;Acc:HGNC:24523]	ENSMMUT00000028446	1611	1780	+
ENSMMUG00000020628	ARPC5L	Actin-related protein 2/3 complex subunit 5 [Source:UniProtKB/TrEMBL;Acc:F7BM58]	ENSMMUT00000029023	1311	1510	+
ENSMMUG00000011441	TMEM106C	Endoplasmic reticulum membrane protein overexpressed in cancer; Transmembrane protein 106C isoform a; Uncharacterized protein [Source:UniProtKB/TrEMBL;Acc:F7B9V1]	ENSMMUT00000016015	1131	1380	+
ENSMMUG00000007702	SEC22A	SEC22 vesicle trafficking protein homolog A (S. cerevisiae) [Source:HGNC Symbol;Acc:HGNC:20260]	ENSMMUT00000010788	756	920	+
ENSMMUG00000007358	PSMB7	Proteasome subunit beta type [Source:UniProtKB/TrEMBL;Acc:F7E9M5]	ENSMMUT00000010282	821	970	+
ENSMMUG00000007354	NEK6	Uncharacterized protein [Source:UniProtKB/TrEMBL;Acc:F7E9P3]	ENSMMUT00000046842	1181	1440	+
ENSMMUG00000032012		Uncharacterized protein [Source:UniProtKB/TrEMBL;Acc:F7H6F6]	ENSMMUT00000046833	31	155	+
ENSMMUG00000022919	STRBP	Spermatid perinuclear RNA-binding protein isoform 1; Uncharacterized protein [Source:UniProtKB/TrEMBL;Acc:F6W6A5]	ENSMMUT00000046825	1761	1910	+
ENSMMUG00000003877	C12ORF41	Uncharacterized protein [Source:UniProtKB/TrEMBL;Acc:F7H5U3]	ENSMMUT00000046824	2511	2653	+
ENSMMUG00000000670	RABGAP1	RAB GTPase activating protein 1 [Source:HGNC Symbol;Acc:HGNC:17155]	ENSMMUT00000032260	3084	3210	+
ENSMMUG00000007629	CCNT1	Cyclin-T1; Uncharacterized protein [Source:UniProtKB/TrEMBL;Acc:F7AQL5]	ENSMMUT00000010683	1851	2050	+
ENSMMUG00000021134	RC3H2	Uncharacterized protein [Source:UniProtKB/TrEMBL;Acc:F7H8K8]	ENSMMUT00000029726	3701	3800	+
ENSMMUG00000008430	CACNB3	Uncharacterized protein; Voltage-dependent L-type calcium channel subunit beta-3 isoform 1 [Source:UniProtKB/TrEMBL;Acc:F6VB97]	ENSMMUT00000011789	1441	1830	+
ENSMMUG00000003457	PRKACB	Uncharacterized protein [Source:UniProtKB/TrEMBL;Acc:F6QM55]	ENSMMUT00000004886	211	430	+
ENSMMUG00000006971	FKBP11	FK506 binding protein 11, 19 kDa [Source:HGNC Symbol;Acc:HGNC:18624]	ENSMMUT00000009745	541	682	+
ENSMMUG00000011106	SNX4	sorting nexin 4 [Source:HGNC Symbol;Acc:HGNC:11175]	ENSMMUT00000015524	961	1380	+
ENSMMUG00000022181	RPF1	Ribosome production factor 1; Uncharacterized protein [Source:UniProtKB/TrEMBL;Acc:F6XHR5]	ENSMMUT00000031195	201	380	+
ENSMMUG00000017125	OSBPL11	oxysterol binding protein-like 11 [Source:HGNC Symbol;Acc:HGNC:16397]	ENSMMUT00000024078	2621	2800	+
ENSMMUG00000015713	PRKAG1	Uncharacterized protein [Source:UniProtKB/TrEMBL;Acc:F6SF90]	ENSMMUT00000022060	1571	1670	+
ENSMMUG00000011455	RBM18	Probable RNA-binding protein 18; Putative RNA-binding protein 18; RNA-binding motif protein 18; Uncharacterized protein [Source:UniProtKB/TrEMBL;Acc:F7B3N2]	ENSMMUT00000016035	1131	1290	+
ENSMMUG00000012847	SLC41A3	Uncharacterized protein [Source:UniProtKB/TrEMBL;Acc:F6TAX3]	ENSMMUT00000046794	1691	2045	+
ENSMMUG00000010127	CTBS	chitobiase, di-N-acetyl- [Source:HGNC Symbol;Acc:HGNC:2496]	ENSMMUT00000014139	1041	1217	+
ENSMMUG00000015718	KMT2D	lysine (K)-specific methyltransferase 2D [Source:HGNC Symbol;Acc:HGNC:7133]	ENSMMUT00000022067	13291	13590	+
ENSMMUG00000015721	RHEBL1	Uncharacterized protein [Source:UniProtKB/TrEMBL;Acc:F6SED7]	ENSMMUT00000022068	961	1140	+
ENSMMUG00000012769	LMBR1L	limb development membrane protein 1-like [Source:HGNC Symbol;Acc:HGNC:18268]	ENSMMUT00000017920	2171	2310	+
ENSMMUG00000015403	MCOLN2	mucolipin 2 [Source:HGNC Symbol;Acc:HGNC:13357]	ENSMMUT00000021593	2371	2520	+
ENSMMUG00000013024	STOM	Uncharacterized protein [Source:UniProtKB/TrEMBL;Acc:F7HP15]	ENSMMUT00000018264	631	860	+
ENSMMUG00000008932	WDR63	WD repeat domain 63 [Source:HGNC Symbol;Acc:HGNC:30711]	ENSMMUT00000046787	2581	2930	+
ENSMMUG00000021081	TUBA1B	Uncharacterized protein [Source:UniProtKB/TrEMBL;Acc:F6Y0X7]	ENSMMUT00000046745	1448	1688	+
ENSMMUG00000005595	RAB14	Ras-related protein Rab-14; Uncharacterized protein [Source:UniProtKB/TrEMBL;Acc:F7G3Z8]	ENSMMUT00000007872	661	960	+
ENSMMUG00000010020	C1orf52	chromosome 1 open reading frame 52 [Source:HGNC Symbol;Acc:HGNC:24871]	ENSMMUT00000013987	461	708	+
ENSMMUG00000004195			ENSMMUT00000005958	551	1190	+
ENSMMUG00000016719	CHCHD6	Coiled-coil-helix-coiled-coil-helix domain-containing protein 6; Uncharacterized protein [Source:UniProtKB/TrEMBL;Acc:F6VDL1]	ENSMMUT00000023489	401	550	+
ENSMMUG00000016720	PLXNA1	Uncharacterized protein [Source:UniProtKB/TrEMBL;Acc:F6VDJ2]	ENSMMUT00000023490	1	370	+
ENSMMUG00000017659	FBLN2	fibulin 2 [Source:HGNC Symbol;Acc:HGNC:3601]	ENSMMUT00000024829	2571	2744	+
ENSMMUG00000020123	TRAF1	Epstein-Barr virus-induced protein 6; TNF receptor-associated factor 1 isoform a; Uncharacterized protein [Source:UniProtKB/TrEMBL;Acc:F7GHV4]	ENSMMUT00000028314	1303	1871	+
ENSMMUG00000001646	FBXW2	F-box and WD repeat domain containing 2 [Source:HGNC Symbol;Acc:HGNC:13608]	ENSMMUT00000002327	1091	1270	+
ENSMMUG00000015885	MEGF9	Uncharacterized protein [Source:UniProtKB/TrEMBL;Acc:F7C0W7]	ENSMMUT00000022326	1421	1680	+
ENSMMUG00000023255	CDK5RAP2	CDK5 regulatory subunit associated protein 2 [Source:HGNC Symbol;Acc:HGNC:18672]	ENSMMUT00000032715	3241	3510	+
ENSMMUG00000015979	NUP210	Uncharacterized protein [Source:UniProtKB/TrEMBL;Acc:F6XNW1]	ENSMMUT00000022467	6200	6617	+
ENSMMUG00000001342	IQSEC1	Uncharacterized protein [Source:UniProtKB/TrEMBL;Acc:F7B954]	ENSMMUT00000001899	891	1220	+
ENSMMUG00000013487	SH3GLB1	Uncharacterized protein [Source:UniProtKB/TrEMBL;Acc:F6ZLA9]	ENSMMUT00000018928	1151	1280	+
ENSMMUG00000001340	RPL32	60S ribosomal protein L32; Uncharacterized protein [Source:UniProtKB/TrEMBL;Acc:F7B979]	ENSMMUT00000001896	36	200	+
ENSMMUG00000014056	HS2ST1	Heparan sulfate 2-O-sulfotransferase 1 isoform 1; Uncharacterized protein [Source:UniProtKB/TrEMBL;Acc:F7AGA6]	ENSMMUT00000019733	1371	1480	+
ENSMMUG00000007450	RAF1	RAF proto-oncogene serine/threonine-protein kinase; Uncharacterized protein [Source:UniProtKB/TrEMBL;Acc:F6SWC0]	ENSMMUT00000010416	2291	2628	+
ENSMMUG00000017383	LMO4	Uncharacterized protein [Source:UniProtKB/TrEMBL;Acc:F7H4J3]	ENSMMUT00000024447	1	100	+
ENSMMUG00000020588	PKN2	protein kinase N2 [Source:HGNC Symbol;Acc:HGNC:9406]	ENSMMUT00000028962	2571	2870	+
ENSMMUG00000007195	TSEN2	TSEN2 tRNA splicing endonuclease subunit [Source:HGNC Symbol;Acc:HGNC:28422]	ENSMMUT00000010049	481	630	+
ENSMMUG00000002794	GTF2B	Transcription initiation factor IIB; Uncharacterized protein [Source:UniProtKB/TrEMBL;Acc:F7H232]	ENSMMUT00000003964	831	1170	+
ENSMMUG00000018795	CCBL2	cysteine conjugate-beta lyase 2 [Source:HGNC Symbol;Acc:HGNC:33238]	ENSMMUT00000026430	421	610	+
ENSMMUG00000019251	GBP3	guanylate binding protein 3 [Source:HGNC Symbol;Acc:HGNC:4184]	ENSMMUT00000027039	1591	1920	+
ENSMMUG00000021806	VGLL4	vestigial-like family member 4 [Source:HGNC Symbol;Acc:HGNC:28966]	ENSMMUT00000030686	3271	3402	+
ENSMMUG00000000662	GBP1	Uncharacterized protein [Source:UniProtKB/TrEMBL;Acc:F7A8B5]	ENSMMUT00000000954	1711	2080	+
ENSMMUG00000000663	GBP6	Uncharacterized protein [Source:UniProtKB/TrEMBL;Acc:F6RNS5]	ENSMMUT00000000957	2191	2562	+
ENSMMUG00000020157		Uncharacterized protein [Source:UniProtKB/TrEMBL;Acc:F6TR70]	ENSMMUT00000028362	1581	1870	+
ENSMMUG00000017707	LRRC8B	Leucine-rich repeat-containing protein 8B; Uncharacterized protein [Source:UniProtKB/TrEMBL;Acc:F6U352]	ENSMMUT00000024887	3131	3290	+
ENSMMUG00000008003	LRRC8C	Leucine-rich repeat-containing protein 8C; Uncharacterized protein [Source:UniProtKB/TrEMBL;Acc:F7HLE0]	ENSMMUT00000011191	2481	2620	+
ENSMMUG00000003442	ZNF326	Uncharacterized protein; Zinc finger protein 326 isoform 1 [Source:UniProtKB/TrEMBL;Acc:F7F4S6]	ENSMMUT00000004871	1571	1737	+
ENSMMUG00000019933		Uncharacterized protein [Source:UniProtKB/TrEMBL;Acc:F7GMD6]	ENSMMUT00000027999	711	933	+
ENSMMUG00000031981			ENSMMUT00000012203	245	371	+
ENSMMUG00000018290	EMC3	ER membrane protein complex subunit 3 [Source:HGNC Symbol;Acc:HGNC:23999]	ENSMMUT00000025702	611	780	+
ENSMMUG00000009788		Uncharacterized protein [Source:UniProtKB/TrEMBL;Acc:F7DXF0]	ENSMMUT00000030600	1211	1340	+
ENSMMUG00000002029			ENSMMUT00000015005	481	602	+
ENSMMUG00000018285	CRELD1	Uncharacterized protein [Source:UniProtKB/TrEMBL;Acc:F7GW64]	ENSMMUT00000025698	1821	2090	+
ENSMMUG00000004900	C15H9ORF91	Uncharacterized protein [Source:UniProtKB/TrEMBL;Acc:F7CJG5]	ENSMMUT00000006920	1751	1910	+
ENSMMUG00000004899	ATP6V1G1	ATPase, H+ transporting, lysosomal 13kDa, V1 subunit G1 [Source:HGNC Symbol;Acc:HGNC:864]	ENSMMUT00000006919	19	350	+
ENSMMUG00000011010	CDC7	Cell division cycle 7-related protein kinase; Uncharacterized protein [Source:UniProtKB/TrEMBL;Acc:F7GQW8]	ENSMMUT00000015393	1331	1710	+
ENSMMUG00000007544	TROAP	Trophinin-associated protein; Uncharacterized protein [Source:UniProtKB/TrEMBL;Acc:F6T807]	ENSMMUT00000010554	1391	1640	+
ENSMMUG00000008018	AKNA	AT-hook transcription factor [Source:HGNC Symbol;Acc:HGNC:24108]	ENSMMUT00000011218	4541	4650	+
ENSMMUG00000003762	SPATS2	spermatogenesis associated, serine-rich 2 [Source:HGNC Symbol;Acc:HGNC:18650]	ENSMMUT00000005324	111	360	+
ENSMMUG00000018280	JAGN1	jagunal homolog 1 (Drosophila) [Source:HGNC Symbol;Acc:HGNC:26926]	ENSMMUT00000025687	781	1030	+
ENSMMUG00000010628	RPUSD3	RNA pseudouridylate synthase domain containing 3 [Source:HGNC Symbol;Acc:HGNC:28437]	ENSMMUT00000005013	851	1220	+
ENSMMUG00000022498	FMNL3	Uncharacterized protein [Source:UniProtKB/TrEMBL;Acc:F6YW64]	ENSMMUT00000031644	2681	2895	+
ENSMMUG00000005068	GFI1	Uncharacterized protein; Zinc finger protein Gfi-1 [Source:UniProtKB/TrEMBL;Acc:F7C4S3]	ENSMMUT00000007148	2101	2579	+
ENSMMUG00000005960	TMBIM6	Bax inhibitor 1; Uncharacterized protein [Source:UniProtKB/TrEMBL;Acc:F7GWD0]	ENSMMUT00000008344	771	886	+
ENSMMUG00000005073	FAM69A	Family with sequence similarity 69, member A; Uncharacterized protein [Source:UniProtKB/TrEMBL;Acc:F7C4M8]	ENSMMUT00000007155	951	1170	+
ENSMMUG00000016808	MTF2	Uncharacterized protein [Source:UniProtKB/TrEMBL;Acc:F7CTR3]	ENSMMUT00000046698	1681	2113	+
ENSMMUG00000031965	ALAD	aminolevulinate dehydratase [Source:HGNC Symbol;Acc:HGNC:395]	ENSMMUT00000046694	971	1080	+
ENSMMUG00000021689	RACGAP1	Rac GTPase-activating protein 1; Uncharacterized protein [Source:UniProtKB/TrEMBL;Acc:F7F0L1]	ENSMMUT00000030517	2491	2600	+
ENSMMUG00000016811	TMED5	Transmembrane emp24 domain-containing protein 5 isoform 1; Uncharacterized protein [Source:UniProtKB/TrEMBL;Acc:F7CTP8]	ENSMMUT00000023618	1011	1250	+
ENSMMUG00000007808	MTMR14	myotubularin related protein 14 [Source:HGNC Symbol;Acc:HGNC:26190]	ENSMMUT00000010937	1951	2210	+
ENSMMUG00000006529	ASIC1	acid-sensing (proton-gated) ion channel 1 [Source:HGNC Symbol;Acc:HGNC:100]	ENSMMUT00000009151	1641	1810	+
ENSMMUG00000005844	PRPF4	U4/U6 small nuclear ribonucleoprotein Prp4; Uncharacterized protein [Source:UniProtKB/TrEMBL;Acc:F6TT32]	ENSMMUT00000008195	1821	2040	+
ENSMMUG00000006531	SMARCD1	SWI/SNF-related matrix-associated actin-dependent regulator of chromatin subfamily D member 1 isoform a; Uncharacterized protein [Source:UniProtKB/TrEMBL;Acc:F7HTX9]	ENSMMUT00000009155	401	600	+
ENSMMUG00000011197	SLC31A1	Copper transporter 1; High affinity copper uptake protein 1; Uncharacterized protein [Source:UniProtKB/TrEMBL;Acc:F6USX2]	ENSMMUT00000015665	701	870	+
ENSMMUG00000016818	DR1	Protein Dr1; Uncharacterized protein [Source:UniProtKB/TrEMBL;Acc:F7C9G1]	ENSMMUT00000023633	661	1030	+
ENSMMUG00000016471	CERS5	ceramide synthase 5 [Source:HGNC Symbol;Acc:HGNC:23749]	ENSMMUT00000023135	1851	1970	+
ENSMMUG00000003943	SETD5	Uncharacterized protein [Source:UniProtKB/TrEMBL;Acc:F6ZMI9]	ENSMMUT00000005591	4151	4720	+
ENSMMUG00000017307	THUMPD3	THUMP domain containing 3 [Source:HGNC Symbol;Acc:HGNC:24493]	ENSMMUT00000046669	1223	1400	+
ENSMMUG00000013857	GCLM	Glutamate--cysteine ligase regulatory subunit; Uncharacterized protein [Source:UniProtKB/TrEMBL;Acc:F6RLS0]	ENSMMUT00000019447	1041	1140	+
ENSMMUG00000008172	LARP4	La ribonucleoprotein domain family, member 4 [Source:HGNC Symbol;Acc:HGNC:24320]	ENSMMUT00000046660	1981	2410	+
ENSMMUG00000000464	ROD1	Uncharacterized protein [Source:UniProtKB/TrEMBL;Acc:F6YQQ9]	ENSMMUT00000000686	1451	1610	+
ENSMMUG00000010565	DIP2B	DIP2 disco-interacting protein 2 homolog B (Drosophila) [Source:HGNC Symbol;Acc:HGNC:29284]	ENSMMUT00000046650	4441	4760	+
ENSMMUG00000008807	EDEM1	ER degradation-enhancing alpha-mannosidase-like 1; Uncharacterized protein [Source:UniProtKB/TrEMBL;Acc:F7F1M7]	ENSMMUT00000012313	2011	2260	+
ENSMMUG00000008810		ADP-ribosylation factor-like protein 8B; Uncharacterized protein [Source:UniProtKB/TrEMBL;Acc:F7F1D7]	ENSMMUT00000012317	391	570	+
ENSMMUG00000023304	GNG10	Guanine nucleotide-binding protein subunit gamma [Source:UniProtKB/TrEMBL;Acc:F7FAQ9]	ENSMMUT00000032787	551	690	+
ENSMMUG00000014588	BHLHE40	Class E basic helix-loop-helix protein 40; Uncharacterized protein [Source:UniProtKB/TrEMBL;Acc:F7GRJ4]	ENSMMUT00000020459	1261	1550	+
ENSMMUG00000012095	ATF1	Cyclic AMP-dependent transcription factor ATF-1; Uncharacterized protein [Source:UniProtKB/TrEMBL;Acc:F7HB38]	ENSMMUT00000016937	1171	1330	+
ENSMMUG00000022961	SLC11A2	Natural resistance-associated macrophage protein 2 isoform 1; Uncharacterized protein [Source:UniProtKB/TrEMBL;Acc:F6U6C6]	ENSMMUT00000046646	3411	3580	+
ENSMMUG00000014013	ABCD3	ATP-binding cassette, sub-family D (ALD), member 3 [Source:HGNC Symbol;Acc:HGNC:67]	ENSMMUT00000019668	1571	1760	+
ENSMMUG00000016315	KIAA0368	KIAA0368 [Source:HGNC Symbol;Acc:HGNC:29020]	ENSMMUT00000022916	3591	3770	+
ENSMMUG00000012453	LETMD1	LETM1 domain containing 1 [Source:HGNC Symbol;Acc:HGNC:24241]	ENSMMUT00000017460	1211	1428	+
ENSMMUG00000012457	CSRNP2	cysteine-serine-rich nuclear protein 2 [Source:HGNC Symbol;Acc:HGNC:16006]	ENSMMUT00000017463	1241	1830	+
ENSMMUG00000004734	SUMF1	sulfatase modifying factor 1 [Source:HGNC Symbol;Acc:HGNC:20376]	ENSMMUT00000006685	1981	2090	+
ENSMMUG00000000152	TFCP2	Uncharacterized protein [Source:UniProtKB/TrEMBL;Acc:F7HG29]	ENSMMUT00000046624	2111	2230	+
ENSMMUG00000001884	DAZAP2	DAZ associated protein 2 [Source:HGNC Symbol;Acc:HGNC:2684]	ENSMMUT00000002653	1	140	+
ENSMMUG00000009425	ACTB	Uncharacterized protein [Source:UniProtKB/TrEMBL;Acc:F6X9G9]	ENSMMUT00000013155	1114	1350	+
ENSMMUG00000000695	TMEM245	transmembrane protein 245 [Source:HGNC Symbol;Acc:HGNC:1363]	ENSMMUT00000000995	2541	2907	+
ENSMMUG00000016388	FRRS1	ferric-chelate reductase 1 [Source:HGNC Symbol;Acc:HGNC:27622]	ENSMMUT00000023009	1791	1900	+
ENSMMUG00000021441	AGL	amylo-alpha-1, 6-glucosidase, 4-alpha-glucanotransferase [Source:HGNC Symbol;Acc:HGNC:321]	ENSMMUT00000046612	4021	4330	+
ENSMMUG00000004238	HIAT1	hippocampus abundant transcript 1 [Source:HGNC Symbol;Acc:HGNC:23363]	ENSMMUT00000006013	1361	1845	+
ENSMMUG00000016959	PPP4R2	protein phosphatase 4, regulatory subunit 2 [Source:HGNC Symbol;Acc:HGNC:18296]	ENSMMUT00000023827	1341	1580	+
ENSMMUG00000015392	C11H12ORF44	Uncharacterized protein [Source:UniProtKB/TrEMBL;Acc:F6S8V3]	ENSMMUT00000046599	951	1320	+
ENSMMUG00000007128	RYBP	Uncharacterized protein [Source:UniProtKB/TrEMBL;Acc:F7DTJ9]	ENSMMUT00000009941	1361	1540	+
ENSMMUG00000019357	IKBKAP	inhibitor of kappa light polypeptide gene enhancer in B-cells, kinase complex-associated protein [Source:HGNC Symbol;Acc:HGNC:5959]	ENSMMUT00000027191	3991	4200	+
ENSMMUG00000014944	RAD23B	RAD23 homolog B (S. cerevisiae) [Source:HGNC Symbol;Acc:HGNC:9813]	ENSMMUT00000020955	1521	1630	+
ENSMMUG00000002669	FCMD	Fukutin isoform a; Uncharacterized protein [Source:UniProtKB/TrEMBL;Acc:F7H2P6]	ENSMMUT00000003802	1121	1380	+
ENSMMUG00000003728	SLC30A7	Uncharacterized protein; Zinc transporter 7 [Source:UniProtKB/TrEMBL;Acc:F6S235]	ENSMMUT00000005275	1021	1280	+
ENSMMUG00000015024	SLC44A1	solute carrier family 44 (choline transporter), member 1 [Source:HGNC Symbol;Acc:HGNC:18798]	ENSMMUT00000021065	3771	4164	+
ENSMMUG00000003730	DPH5	diphthamide biosynthesis 5 [Source:HGNC Symbol;Acc:HGNC:24270]	ENSMMUT00000005277	701	840	+
ENSMMUG00000002468	KRT5	keratin 5 [Source:HGNC Symbol;Acc:HGNC:6442]	ENSMMUT00000003511	871	980	+
ENSMMUG00000020608	ABCA1	Uncharacterized protein [Source:UniProtKB/TrEMBL;Acc:F7BTN9]	ENSMMUT00000028999	6011	6270	+
ENSMMUG00000008627	ARL6IP5	PRA1 family protein 3; Uncharacterized protein [Source:UniProtKB/TrEMBL;Acc:F7FCU0]	ENSMMUT00000012063	551	960	+
ENSMMUG00000008620	UBA3	Uncharacterized protein [Source:UniProtKB/TrEMBL;Acc:F7FCV2]	ENSMMUT00000012059	1311	1427	+
ENSMMUG00000020463	SMC2	Uncharacterized protein [Source:UniProtKB/TrEMBL;Acc:F6VS74]	ENSMMUT00000046564	2691	2830	+
ENSMMUG00000009693	SUCLG2	Uncharacterized protein [Source:UniProtKB/TrEMBL;Acc:F6Y3N7]	ENSMMUT00000013533	131	280	+
ENSMMUG00000004081	KBTBD8	Uncharacterized protein [Source:UniProtKB/TrEMBL;Acc:F6ZJ59]	ENSMMUT00000005790	1261	1510	+
ENSMMUG00000016670	RNF20	E3 ubiquitin-protein ligase BRE1A; Uncharacterized protein [Source:UniProtKB/TrEMBL;Acc:F6VU61]	ENSMMUT00000023429	3001	3290	+
ENSMMUG00000001531	LRIG1	leucine-rich repeats and immunoglobulin-like domains 1 [Source:HGNC Symbol;Acc:HGNC:17360]	ENSMMUT00000002164	2761	2870	+
ENSMMUG00000001529	SLC25A26	Uncharacterized protein [Source:UniProtKB/TrEMBL;Acc:F7GC43]	ENSMMUT00000046558	691	988	+
ENSMMUG00000023797	C9ORF125	Transmembrane protein C9orf125; Uncharacterized protein [Source:UniProtKB/TrEMBL;Acc:F7HRC5]	ENSMMUT00000033487	1321	1470	+
ENSMMUG00000018039	RNPC3	RNA-binding region (RNP1, RRM) containing 3 [Source:HGNC Symbol;Acc:HGNC:18666]	ENSMMUT00000025339	721	950	+
ENSMMUG00000006802	PRMT6	Protein arginine N-methyltransferase 6; Uncharacterized protein [Source:UniProtKB/TrEMBL;Acc:F7H1A9]	ENSMMUT00000009512	994	1230	+
ENSMMUG00000001526	TEX10	Testis-expressed sequence 10 protein; Uncharacterized protein [Source:UniProtKB/TrEMBL;Acc:F7GC51]	ENSMMUT00000002156	311	920	+
ENSMMUG00000000329	SPRYD3	SPRY domain containing 3 [Source:HGNC Symbol;Acc:HGNC:25920]	ENSMMUT00000000483	1011	1270	+
ENSMMUG00000020339	SOAT2	sterol O-acyltransferase 2 [Source:HGNC Symbol;Acc:HGNC:11178]	ENSMMUT00000028610	1781	2015	+
ENSMMUG00000001509	PSMD6	26S proteasome non-ATPase regulatory subunit 6; Uncharacterized protein [Source:UniProtKB/TrEMBL;Acc:F7GFM2]	ENSMMUT00000046530	1751	1940	+
ENSMMUG00000011415	ERP44	endoplasmic reticulum protein 44 [Source:HGNC Symbol;Acc:HGNC:18311]	ENSMMUT00000015983	501	600	+
ENSMMUG00000011414	STX17	Syntaxin-17; Uncharacterized protein [Source:UniProtKB/TrEMBL;Acc:F6VSJ7]	ENSMMUT00000015982	1441	2130	+
ENSMMUG00000005245	ITGB7	integrin, beta 7 [Source:HGNC Symbol;Acc:HGNC:6162]	ENSMMUT00000007384	2091	2360	+
ENSMMUG00000010662	ALG2	Uncharacterized protein [Source:UniProtKB/TrEMBL;Acc:F7B4R0]	ENSMMUT00000014910	861	970	+
ENSMMUG00000010155	PRPF38B	Pre-mRNA-splicing factor 38B; Uncharacterized protein [Source:UniProtKB/TrEMBL;Acc:F6QPW1]	ENSMMUT00000014178	2731	2870	+
ENSMMUG00000019561	GALNT12	Uncharacterized protein [Source:UniProtKB/TrEMBL;Acc:F7BMV2]	ENSMMUT00000027480	1651	1902	+
ENSMMUG00000018523	ANKS6	Uncharacterized protein [Source:UniProtKB/TrEMBL;Acc:F7A2F6]	ENSMMUT00000026043	3161	3320	+
ENSMMUG00000015672	PDHB	Pyruvate dehydrogenase E1 component subunit beta, mitochondrial isoform 1; Uncharacterized protein [Source:UniProtKB/TrEMBL;Acc:F6R4J1]	ENSMMUT00000046499	161	390	+
ENSMMUG00000020036	SP1	Transcription factor Sp1 isoform a; Uncharacterized protein [Source:UniProtKB/TrEMBL;Acc:F7GDJ8]	ENSMMUT00000028166	2451	2670	+
ENSMMUG00000031892			ENSMMUT00000046502	765	905	+
ENSMMUG00000009265	WDR47	WD repeat domain 47 [Source:HGNC Symbol;Acc:HGNC:29141]	ENSMMUT00000012951	2931	3160	+
ENSMMUG00000015654	C9orf156	chromosome 9 open reading frame 156 [Source:HGNC Symbol;Acc:HGNC:30967]	ENSMMUT00000046494	781	1160	+
ENSMMUG00000002841		Uncharacterized protein [Source:UniProtKB/TrEMBL;Acc:F7H2H7]	ENSMMUT00000004027	543	980	+
ENSMMUG00000006315	ABHD6	Uncharacterized protein [Source:UniProtKB/TrEMBL;Acc:F7HIR3]	ENSMMUT00000046489	1271	1788	+
ENSMMUG00000018492	TARBP2	TAR (HIV-1) RNA binding protein 2 [Source:HGNC Symbol;Acc:HGNC:11569]	ENSMMUT00000026007	1511	1719	+
ENSMMUG00000021837	SARS	seryl-tRNA synthetase [Source:HGNC Symbol;Acc:HGNC:10537]	ENSMMUT00000030726	1	598	+
ENSMMUG00000012281	NCBP1	80 kDa nuclear cap-binding protein; Uncharacterized protein [Source:UniProtKB/TrEMBL;Acc:F7DRW1]	ENSMMUT00000017202	2251	2369	+
ENSMMUG00000015375	CELSR2	cadherin, EGF LAG seven-pass G-type receptor 2 [Source:HGNC Symbol;Acc:HGNC:3231]	ENSMMUT00000021557	5831	6270	+
ENSMMUG00000000706	FLNB	Uncharacterized protein [Source:UniProtKB/TrEMBL;Acc:F6YS56]	ENSMMUT00000001021	3401	3600	+
ENSMMUG00000012279	TSTD2	Uncharacterized protein [Source:UniProtKB/TrEMBL;Acc:F7DS33]	ENSMMUT00000017200	1331	1540	+
ENSMMUG00000022313		Uncharacterized protein [Source:UniProtKB/TrEMBL;Acc:F6XDN2]	ENSMMUT00000031392	101	260	+
ENSMMUG00000012278	TMOD1	Erythrocyte tropomodulin; Tropomodulin-1; Uncharacterized protein [Source:UniProtKB/TrEMBL;Acc:F7DS60]	ENSMMUT00000017196	1061	1230	+
ENSMMUG00000016241	ATP5G1	Uncharacterized protein [Source:UniProtKB/TrEMBL;Acc:F7GGY3]	ENSMMUT00000046480	621	732	+
ENSMMUG00000009457	CALCOCO1	Uncharacterized protein [Source:UniProtKB/TrEMBL;Acc:F7AA22]	ENSMMUT00000046479	1161	1420	+
ENSMMUG00000005813	PSMA5	Proteasome subunit alpha type [Source:UniProtKB/TrEMBL;Acc:F6VLE9]	ENSMMUT00000008148	681	857	+
ENSMMUG00000004800	SLMAP	Uncharacterized protein [Source:UniProtKB/TrEMBL;Acc:F6S6L4]	ENSMMUT00000046475	2481	2580	+
ENSMMUG00000008670	SHB	Uncharacterized protein [Source:UniProtKB/TrEMBL;Acc:F7DQX6]	ENSMMUT00000012122	1	240	+
ENSMMUG00000008667	DCAF10	DDB1 and CUL4 associated factor 10 [Source:HGNC Symbol;Acc:HGNC:23686]	ENSMMUT00000012115	1361	1730	+
ENSMMUG00000008665	EXOSC3	Exosome complex component RRP40 isoform 1; Uncharacterized protein [Source:UniProtKB/TrEMBL;Acc:F7F3T0]	ENSMMUT00000012112	741	960	+
ENSMMUG00000005818	GNAI3	Guanine nucleotide-binding protein G(K) subunit alpha; Uncharacterized protein [Source:UniProtKB/TrEMBL;Acc:F6VL43]	ENSMMUT00000008155	1191	1460	+
ENSMMUG00000012989	HNRNPA1	heterogeneous nuclear ribonucleoprotein A1 [Source:HGNC Symbol;Acc:HGNC:5031]	ENSMMUT00000018222	871	1050	+
ENSMMUG00000018619	DENND6A	DENN/MADD domain containing 6A [Source:HGNC Symbol;Acc:HGNC:26635]	ENSMMUT00000026175	1711	2106	+
ENSMMUG00000005182	COPZ1	Uncharacterized protein [Source:UniProtKB/TrEMBL;Acc:F7CYT2]	ENSMMUT00000007296	351	498	+
ENSMMUG00000017887	TOMM5	Uncharacterized protein [Source:UniProtKB/TrEMBL;Acc:F7F1V2]	ENSMMUT00000025137	351	510	+
ENSMMUG00000018617	ARF4	ADP-ribosylation factor 4; Uncharacterized protein [Source:UniProtKB/TrEMBL;Acc:F6XZM8]	ENSMMUT00000026172	711	860	+
ENSMMUG00000017886	FBXO10	F-box protein 10 [Source:HGNC Symbol;Acc:HGNC:13589]	ENSMMUT00000025134	2921	3050	+
ENSMMUG00000017892	POLR1E	polymerase (RNA) I polypeptide E, 53kDa [Source:HGNC Symbol;Acc:HGNC:17631]	ENSMMUT00000025144	551	650	+
ENSMMUG00000000108	NCKAP1L	NCK-associated protein 1-like [Source:HGNC Symbol;Acc:HGNC:4862]	ENSMMUT00000000158	3518	3690	+
ENSMMUG00000003782	MELK	maternal embryonic leucine zipper kinase [Source:HGNC Symbol;Acc:HGNC:16870]	ENSMMUT00000005354	1881	1980	+
ENSMMUG00000010163	ARHGEF3	Rho guanine nucleotide exchange factor (GEF) 3 [Source:HGNC Symbol;Acc:HGNC:683]	ENSMMUT00000046452	2781	2950	+
ENSMMUG00000006135	GNE	glucosamine (UDP-N-acetyl)-2-epimerase/N-acetylmannosamine kinase [Source:HGNC Symbol;Acc:HGNC:23657]	ENSMMUT00000008576	2011	2327	+
ENSMMUG00000002820	FAM208A	Uncharacterized protein [Source:UniProtKB/TrEMBL;Acc:F7H086]	ENSMMUT00000003993	4431	4640	+
ENSMMUG00000016203	KIAA0748	Uncharacterized protein [Source:UniProtKB/TrEMBL;Acc:F7FPM2]	ENSMMUT00000022768	1091	1230	+
ENSMMUG00000002017		Uncharacterized protein [Source:UniProtKB/TrEMBL;Acc:F6TMP5]	ENSMMUT00000002858	821	930	+
ENSMMUG00000031865			ENSMMUT00000046442	330	550	+
ENSMMUG00000019272	SELK	Macaca mulatta selenoprotein K (SELK), mRNA. [Source:RefSeq mRNA;Acc:NM_001159381]	ENSMMUT00000027069	90	210	+
ENSMMUG00000019269	ACTR8	Uncharacterized protein [Source:UniProtKB/TrEMBL;Acc:F6SI88]	ENSMMUT00000027064	1721	2016	+
ENSMMUG00000016337	HINT2	Histidine triad nucleotide-binding protein 2, mitochondrial; Uncharacterized protein [Source:UniProtKB/TrEMBL;Acc:F7GRL0]	ENSMMUT00000046437	27	240	+
ENSMMUG00000013232	CD63	CD63 antigen isoform A; Melanoma-associated antigen ME491; Uncharacterized protein [Source:UniProtKB/TrEMBL;Acc:F6XET9]	ENSMMUT00000018559	911	1070	+
ENSMMUG00000005426	STRIP1	striatin interacting protein 1 [Source:HGNC Symbol;Acc:HGNC:25916]	ENSMMUT00000007635	2271	2680	+
ENSMMUG00000006292	ORMDL2	ORM1-like 2 (S. cerevisiae) [Source:HGNC Symbol;Acc:HGNC:16037]	ENSMMUT00000008810	1	140	+
ENSMMUG00000006293	DNAJC14	DnaJ (Hsp40) homolog, subfamily C, member 14 [Source:HGNC Symbol;Acc:HGNC:24581]	ENSMMUT00000008812	611	890	+
ENSMMUG00000016333	RGP1	Retrograde Golgi transport protein RGP1 homolog; Uncharacterized protein [Source:UniProtKB/TrEMBL;Acc:F7GRM3]	ENSMMUT00000022937	1061	1370	+
ENSMMUG00000016331	GBA2	glucosidase, beta (bile acid) 2 [Source:HGNC Symbol;Acc:HGNC:18986]	ENSMMUT00000046426	3294	3626	+
ENSMMUG00000016328	CREB3	Uncharacterized protein [Source:UniProtKB/TrEMBL;Acc:F7GSV7]	ENSMMUT00000022933	291	420	+
ENSMMUG00000031856	TLN1	talin 1 [Source:HGNC Symbol;Acc:HGNC:11845]	ENSMMUT00000046424	7851	8030	+
ENSMMUG00000007230	PRKCD	protein kinase C, delta [Source:HGNC Symbol;Acc:HGNC:9399]	ENSMMUT00000010110	1941	2130	+
ENSMMUG00000016197	RFT1	RFT1 homolog (S. cerevisiae) [Source:HGNC Symbol;Acc:HGNC:30220]	ENSMMUT00000022755	2271	2480	+
ENSMMUG00000018684	KCNA3	Potassium voltage-gated channel subfamily A member 3; Uncharacterized protein [Source:UniProtKB/TrEMBL;Acc:F6ZSH4]	ENSMMUT00000026267	1051	1150	+
ENSMMUG00000000811	CD53	CD53 molecule [Source:HGNC Symbol;Acc:HGNC:1686]	ENSMMUT00000001175	941	1330	+
ENSMMUG00000016323	ARHGEF39	Rho guanine nucleotide exchange factor (GEF) 39 [Source:HGNC Symbol;Acc:HGNC:25909]	ENSMMUT00000046416	1141	1620	+
ENSMMUG00000018816	PMEL	premelanosome protein [Source:HGNC Symbol;Acc:HGNC:10880]	ENSMMUT00000046415	1310	1620	+
ENSMMUG00000002463	DRAM2	DNA damage-regulated autophagy modulator protein 2; Uncharacterized protein [Source:UniProtKB/TrEMBL;Acc:F7HGZ0]	ENSMMUT00000003506	951	1190	+
ENSMMUG00000016327	CCDC107	coiled-coil domain containing 107 [Source:HGNC Symbol;Acc:HGNC:28465]	ENSMMUT00000022930	644	810	+
ENSMMUG00000002461	CEPT1	Choline/ethanolaminephosphotransferase 1; Uncharacterized protein [Source:UniProtKB/TrEMBL;Acc:F7HL54]	ENSMMUT00000003505	1	433	+
ENSMMUG00000018817	CDK2	cyclin-dependent kinase 2 [Source:HGNC Symbol;Acc:HGNC:1771]	ENSMMUT00000026459	1063	1290	+
ENSMMUG00000016319	SIT1	Signaling threshold-regulating transmembrane adapter 1; Suppression-inducing transmembrane adapter 1; Uncharacterized protein [Source:UniProtKB/TrEMBL;Acc:F7GT19]	ENSMMUT00000022917	671	870	+
ENSMMUG00000016316	TESK1	Dual specificity testis-specific protein kinase 1; Uncharacterized protein [Source:UniProtKB/TrEMBL;Acc:F7GT25]	ENSMMUT00000022914	2031	2418	+
ENSMMUG00000017042		40S ribosomal protein S26; Uncharacterized protein [Source:UniProtKB/TrEMBL;Acc:F7HQQ4]	ENSMMUT00000023957	501	651	+
ENSMMUG00000002164	PA2G4	Uncharacterized protein [Source:UniProtKB/TrEMBL;Acc:F6U975]	ENSMMUT00000046387	1481	1630	+
ENSMMUG00000003311	WDR77	Methylosome protein 50; Uncharacterized protein [Source:UniProtKB/TrEMBL;Acc:F7EL45]	ENSMMUT00000004682	1951	2078	+
ENSMMUG00000031842	CHCHD3	Coiled-coil-helix-coiled-coil-helix domain-containing protein 3, mitochondrial; Uncharacterized protein [Source:UniProtKB/TrEMBL;Acc:F7G3N0]	ENSMMUT00000046391	212	420	+
ENSMMUG00000012526	GLT8D1	Glycosyltransferase 8 domain-containing protein 1; Uncharacterized protein [Source:UniProtKB/TrEMBL;Acc:F7ECP8]	ENSMMUT00000046388	1021	1555	+
ENSMMUG00000003313	ATP5F1	ATP synthase subunit b, mitochondrial; Uncharacterized protein [Source:UniProtKB/TrEMBL;Acc:F7EHQ1]	ENSMMUT00000004684	427	911	+
ENSMMUG00000011864	STOML2	Stomatin-like protein 2; Uncharacterized protein [Source:UniProtKB/TrEMBL;Acc:F7H2K5]	ENSMMUT00000016624	641	850	+
ENSMMUG00000021979	ESYT1	Extended synaptotagmin-1 isoform 2; Uncharacterized protein [Source:UniProtKB/TrEMBL;Acc:F6RSH0]	ENSMMUT00000030926	11	240	+
ENSMMUG00000017361	PBRM1	Uncharacterized protein [Source:UniProtKB/TrEMBL;Acc:F7H6U8]	ENSMMUT00000024425	3891	4220	+
ENSMMUG00000031839		Uncharacterized protein [Source:UniProtKB/TrEMBL;Acc:F7HNE0]	ENSMMUT00000046381	701	810	+
ENSMMUG00000020191	FANCG	Fanconi anemia group G protein; Uncharacterized protein [Source:UniProtKB/TrEMBL;Acc:F6WT79]	ENSMMUT00000028406	1	180	+
ENSMMUG00000014489	DDX20	DEAD (Asp-Glu-Ala-Asp) box polypeptide 20 [Source:HGNC Symbol;Acc:HGNC:2743]	ENSMMUT00000020325	2471	2992	+
ENSMMUG00000020190	VCP	Uncharacterized protein [Source:UniProtKB/TrEMBL;Acc:F6WT88]	ENSMMUT00000046375	2611	2890	+
ENSMMUG00000021981	RNF41	E3 ubiquitin-protein ligase NRDP1; E3 ubiquitin-protein ligase NRDP1 isoform 1; Uncharacterized protein [Source:UniProtKB/TrEMBL;Acc:F6RSF7]	ENSMMUT00000046371	1181	1570	+
ENSMMUG00000008679	ANKRD52	ankyrin repeat domain 52 [Source:HGNC Symbol;Acc:HGNC:26614]	ENSMMUT00000012130	1441	1640	+
ENSMMUG00000005619	NISCH	nischarin [Source:HGNC Symbol;Acc:HGNC:18006]	ENSMMUT00000007901	4941	5060	+
ENSMMUG00000002483	CS	citrate synthase [Source:HGNC Symbol;Acc:HGNC:2422]	ENSMMUT00000003531	1469	1695	+
ENSMMUG00000013271	CNPY2	MIR-interacting saposin-like protein; Protein canopy homolog 2 isoform 1; Uncharacterized protein [Source:UniProtKB/TrEMBL;Acc:F6Z678]	ENSMMUT00000018635	1021	1200	+
ENSMMUG00000013482	PAN2	PAB-dependent poly(A)-specific ribonuclease subunit 2 isoform 3; Uncharacterized protein [Source:UniProtKB/TrEMBL;Acc:F6ZLF2]	ENSMMUT00000046364	4411	4662	+
ENSMMUG00000016982	BAP1	BRCA1 associated protein-1 (ubiquitin carboxy-terminal hydrolase) [Source:HGNC Symbol;Acc:HGNC:950]	ENSMMUT00000023865	3391	3490	+
ENSMMUG00000031831	IL23A	Interleukin-23 subunit alpha; Uncharacterized protein [Source:UniProtKB/TrEMBL;Acc:F7HQI5]	ENSMMUT00000046362	781	960	+
ENSMMUG00000000803	STAT2	Signal transducer and activator of transcription 2 isoform 1; Uncharacterized protein; p113 [Source:UniProtKB/TrEMBL;Acc:F6R1P6]	ENSMMUT00000001167	2321	2620	+
ENSMMUG00000020774	SIGMAR1	Uncharacterized protein [Source:UniProtKB/TrEMBL;Acc:F7HC79]	ENSMMUT00000029221	601	940	+
ENSMMUG00000021878	TIMELESS	timeless circadian clock [Source:HGNC Symbol;Acc:HGNC:11813]	ENSMMUT00000030782	3511	3770	+
ENSMMUG00000008234	WDR82	Uncharacterized protein; WD repeat-containing protein 82 [Source:UniProtKB/TrEMBL;Acc:F7HSB5]	ENSMMUT00000011508	925	1372	+
ENSMMUG00000000859	SPRYD4	SPRY domain containing 4 [Source:HGNC Symbol;Acc:HGNC:27468]	ENSMMUT00000001227	471	600	+
ENSMMUG00000000860	GLS2	Uncharacterized protein [Source:UniProtKB/TrEMBL;Acc:F6TFZ2]	ENSMMUT00000046354	2301	2580	+
ENSMMUG00000015670	MOV10	Uncharacterized protein [Source:UniProtKB/TrEMBL;Acc:F6R595]	ENSMMUT00000046352	4161	4310	+
ENSMMUG00000015671		Uncharacterized protein [Source:UniProtKB/TrEMBL;Acc:F6R574]	ENSMMUT00000021990	331	460	+
ENSMMUG00000019332	BAZ2A	bromodomain adjacent to zinc finger domain, 2A [Source:HGNC Symbol;Acc:HGNC:962]	ENSMMUT00000027154	1901	2440	+
ENSMMUG00000012485	POC1A	Uncharacterized protein [Source:UniProtKB/TrEMBL;Acc:F7FAV6]	ENSMMUT00000017502	1531	1710	+
ENSMMUG00000006171	SLC16A1	Monocarboxylate transporter 1; Uncharacterized protein [Source:UniProtKB/TrEMBL;Acc:F7HQX2]	ENSMMUT00000008638	1701	1880	+
ENSMMUG00000001027		ATP synthase subunit beta [Source:UniProtKB/TrEMBL;Acc:F6SIE0]	ENSMMUT00000001464	1	140	+
ENSMMUG00000019098	LRIG2	leucine-rich repeats and immunoglobulin-like domains 2 [Source:HGNC Symbol;Acc:HGNC:20889]	ENSMMUT00000026841	3561	3700	+
ENSMMUG00000013766	MMU.4022	Prostaglandin E synthase 3; Uncharacterized protein [Source:UniProtKB/TrEMBL;Acc:F6Q847]	ENSMMUT00000019329	601	838	+
ENSMMUG00000031826	UBAP1	Ubiquitin-associated protein 1; Ubiquitin-associated protein 1 isoform 1; Uncharacterized protein [Source:UniProtKB/TrEMBL;Acc:F7H7K7]	ENSMMUT00000046343	1141	1270	+
ENSMMUG00000019657	ABHD14B	Macaca mulatta abhydrolase domain containing 14B (ABHD14B), mRNA. [Source:RefSeq mRNA;Acc:NM_001171865]	ENSMMUT00000027612	1671	1807	+
ENSMMUG00000019658	ABHD14A	Abhydrolase domain-containing protein 14A; Uncharacterized protein [Source:UniProtKB/TrEMBL;Acc:F7CNR2]	ENSMMUT00000027618	831	1060	+
ENSMMUG00000017458	DCAF12	DDB1 and CUL4 associated factor 12 [Source:HGNC Symbol;Acc:HGNC:19911]	ENSMMUT00000024551	3191	3351	+
ENSMMUG00000022205	PCBP4	Uncharacterized protein [Source:UniProtKB/TrEMBL;Acc:F6Z9M6]	ENSMMUT00000031236	2091	2280	+
ENSMMUG00000017819	PHTF1	Uncharacterized protein [Source:UniProtKB/TrEMBL;Acc:F7DW84]	ENSMMUT00000046336	1441	1560	+
ENSMMUG00000012597	UBAP2	ubiquitin associated protein 2 [Source:HGNC Symbol;Acc:HGNC:14185]	ENSMMUT00000017667	1911	2040	+
ENSMMUG00000017823	RSBN1	Uncharacterized protein [Source:UniProtKB/TrEMBL;Acc:F7DVS5]	ENSMMUT00000025046	2171	2310	+
ENSMMUG00000019783	TMEM194A	Transmembrane protein 194A; Uncharacterized protein [Source:UniProtKB/TrEMBL;Acc:F7G5G8]	ENSMMUT00000027808	4051	4260	+
ENSMMUG00000006786	PTPN22	Uncharacterized protein [Source:UniProtKB/TrEMBL;Acc:F7H1I7]	ENSMMUT00000046334	1351	1600	+
ENSMMUG00000003644	RRP9	Uncharacterized protein [Source:UniProtKB/TrEMBL;Acc:F6PY48]	ENSMMUT00000005161	3	410	+
ENSMMUG00000017527	STAT6	Signal transducer and activator of transcription 6 isoform 1; Uncharacterized protein [Source:UniProtKB/TrEMBL;Acc:F6UMM2]	ENSMMUT00000024650	3831	3931	+
ENSMMUG00000000389	NOL6	Uncharacterized protein [Source:UniProtKB/TrEMBL;Acc:F6X5R1]	ENSMMUT00000000568	3602	3889	+
ENSMMUG00000019528	AP4B1	adaptor-related protein complex 4, beta 1 subunit [Source:HGNC Symbol;Acc:HGNC:572]	ENSMMUT00000027431	2121	2393	+
ENSMMUG00000012002	RAD54L2	RAD54-like 2 (S. cerevisiae) [Source:HGNC Symbol;Acc:HGNC:29123]	ENSMMUT00000016810	3751	4020	+
ENSMMUG00000021535	HIPK1	homeodomain interacting protein kinase 1 [Source:HGNC Symbol;Acc:HGNC:19006]	ENSMMUT00000030307	5461	5560	+
ENSMMUG00000004280	VPRBP	Vpr (HIV-1) binding protein [Source:HGNC Symbol;Acc:HGNC:30911]	ENSMMUT00000006085	4048	4360	+
ENSMMUG00000004278	MANF	Uncharacterized protein [Source:UniProtKB/TrEMBL;Acc:F6ZSK8]	ENSMMUT00000006082	421	600	+
ENSMMUG00000010495	MAPKAPK3	MAP kinase-activated protein kinase 3; Uncharacterized protein [Source:UniProtKB/TrEMBL;Acc:F7BFL2]	ENSMMUT00000014687	1651	2000	+
ENSMMUG00000020149	CHMP5	Charged multivesicular body protein 5 isoform 1; Chromatin-modifying protein 5; Uncharacterized protein [Source:UniProtKB/TrEMBL;Acc:F6TSB3]	ENSMMUT00000028350	581	890	+
ENSMMUG00000021789	R3HDM2	Uncharacterized protein [Source:UniProtKB/TrEMBL;Acc:F7DE77]	ENSMMUT00000030661	2554	2930	+
ENSMMUG00000010497	CISH	Cytokine-inducible SH2-containing protein isoform 2; Uncharacterized protein [Source:UniProtKB/TrEMBL;Acc:F7BFK3]	ENSMMUT00000014688	1141	1240	+
ENSMMUG00000010498	HEMK1	HemK methyltransferase family member 1 [Source:HGNC Symbol;Acc:HGNC:24923]	ENSMMUT00000014691	1461	1580	+
ENSMMUG00000010499	C2H3ORF18	Putative uncharacterized protein C3orf18; Uncharacterized protein [Source:UniProtKB/TrEMBL;Acc:F7B9A5]	ENSMMUT00000046313	1101	1340	+
ENSMMUG00000022060	ARHGAP9	Uncharacterized protein [Source:UniProtKB/TrEMBL;Acc:F7HP48]	ENSMMUT00000031047	2471	2660	+
ENSMMUG00000002086	B4GALT1	Beta-1,4-galactosyltransferase 1; Uncharacterized protein [Source:UniProtKB/TrEMBL;Acc:F6WPI5]	ENSMMUT00000046311	581	790	+
ENSMMUG00000011277	MARS	Uncharacterized protein [Source:UniProtKB/TrEMBL;Acc:F6WA55]	ENSMMUT00000015780	2441	2781	+
ENSMMUG00000007724	APTX	Uncharacterized protein [Source:UniProtKB/TrEMBL;Acc:F7C3I2]	ENSMMUT00000010833	1211	1350	+
ENSMMUG00000007021	TMEM115	Transmembrane protein 115; Uncharacterized protein [Source:UniProtKB/TrEMBL;Acc:F7F5U5]	ENSMMUT00000009810	1721	1890	+
ENSMMUG00000001974	CSDE1	Uncharacterized protein [Source:UniProtKB/TrEMBL;Acc:F6VGN9]	ENSMMUT00000002788	1	100	+
ENSMMUG00000007019	CYB561D2	Cytochrome b561 domain-containing protein 2; Uncharacterized protein [Source:UniProtKB/TrEMBL;Acc:F7H9V8]	ENSMMUT00000046307	1421	1520	+
ENSMMUG00000007013	NPRL2	nitrogen permease regulator-like 2 (S. cerevisiae) [Source:HGNC Symbol;Acc:HGNC:24969]	ENSMMUT00000009806	1431	1647	+
ENSMMUG00000011286	DDIT3	DNA damage-inducible transcript 3 protein; Uncharacterized protein [Source:UniProtKB/TrEMBL;Acc:F6WA37]	ENSMMUT00000015789	521	710	+
ENSMMUG00000011292	DCTN2	dynactin 2 (p50) [Source:HGNC Symbol;Acc:HGNC:2712]	ENSMMUT00000046301	251	530	+
ENSMMUG00000006996	RASSF1	Uncharacterized protein [Source:UniProtKB/TrEMBL;Acc:F7DJY8]	ENSMMUT00000009778	1731	1870	+
ENSMMUG00000001973	SIKE1	Uncharacterized protein [Source:UniProtKB/TrEMBL;Acc:F6VGR3]	ENSMMUT00000046304	611	810	+
ENSMMUG00000002686	TOPORS	Uncharacterized protein [Source:UniProtKB/TrEMBL;Acc:F7H9W6]	ENSMMUT00000003826	3181	3320	+
ENSMMUG00000020119	IFRD2	Uncharacterized protein [Source:UniProtKB/TrEMBL;Acc:F7GI34]	ENSMMUT00000028306	1841	1946	+
ENSMMUG00000001180	DTX3	deltex 3, E3 ubiquitin ligase [Source:HGNC Symbol;Acc:HGNC:24457]	ENSMMUT00000001668	1631	1770	+
ENSMMUG00000020116	GNAI2	Uncharacterized protein [Source:UniProtKB/TrEMBL;Acc:F7FD32]	ENSMMUT00000028300	1771	1920	+
ENSMMUG00000008151	ATP1A1	Uncharacterized protein [Source:UniProtKB/TrEMBL;Acc:F7HE84]	ENSMMUT00000011389	271	410	+
ENSMMUG00000001182	B4GALNT1	Beta-1,4 N-acetylgalactosaminyltransferase 1; Uncharacterized protein [Source:UniProtKB/TrEMBL;Acc:F6R9K4]	ENSMMUT00000001675	4201	4380	+
ENSMMUG00000020710	OS9	Uncharacterized protein [Source:UniProtKB/TrEMBL;Acc:F6PTF4]	ENSMMUT00000029133	2091	2240	+
ENSMMUG00000010337	SEMA3F	sema domain, immunoglobulin domain (Ig), short basic domain, secreted, (semaphorin) 3F [Source:HGNC Symbol;Acc:HGNC:10728]	ENSMMUT00000014456	2676	3091	+
ENSMMUG00000006074	PLAA	Phospholipase A-2-activating protein; Uncharacterized protein [Source:UniProtKB/TrEMBL;Acc:F6VW58]	ENSMMUT00000008493	2291	2610	+
ENSMMUG00000004921	RBM5	RNA-binding protein 5; Uncharacterized protein [Source:UniProtKB/TrEMBL;Acc:F7CDY6]	ENSMMUT00000006944	2201	2380	+
ENSMMUG00000023690	AGAP2	Arf-GAP with GTPase, ANK repeat and PH domain-containing protein 2 isoform PIKE-S; Uncharacterized protein [Source:UniProtKB/TrEMBL;Acc:F7HCX8]	ENSMMUT00000033343	3541	3680	+
ENSMMUG00000016905	TTF2	transcription termination factor, RNA polymerase II [Source:HGNC Symbol;Acc:HGNC:12398]	ENSMMUT00000023746	1771	1930	+
ENSMMUG00000006073	CAAP1	Uncharacterized protein [Source:UniProtKB/TrEMBL;Acc:F6W2I1]	ENSMMUT00000008491	711	1120	+
ENSMMUG00000023691	TSPAN31	Tetraspanin-31; Uncharacterized protein [Source:UniProtKB/TrEMBL;Acc:F7HCX5]	ENSMMUT00000033346	971	1135	+
ENSMMUG00000001137	MTAP	S-methyl-5'-thioadenosine phosphorylase [Source:UniProtKB/Swiss-Prot;Acc:F6RQL9]	ENSMMUT00000001605	971	1210	+
ENSMMUG00000016480	CAMKV	Uncharacterized protein [Source:UniProtKB/TrEMBL;Acc:F7G7H4]	ENSMMUT00000023155	1321	1546	+
ENSMMUG00000021685	MAN1A2	mannosidase, alpha, class 1A, member 2 [Source:HGNC Symbol;Acc:HGNC:6822]	ENSMMUT00000030511	2601	2940	+
ENSMMUG00000022143	2015-03-09	Uncharacterized protein [Source:UniProtKB/TrEMBL;Acc:F7H3B9]	ENSMMUT00000031146	1841	1989	+
ENSMMUG00000010959	KLHL9	kelch-like family member 9 [Source:HGNC Symbol;Acc:HGNC:18732]	ENSMMUT00000015335	1041	1320	+
ENSMMUG00000004907	FAM46C	Uncharacterized protein [Source:UniProtKB/TrEMBL;Acc:F7CJC7]	ENSMMUT00000006929	1551	1650	+
ENSMMUG00000022148	METTL1	Uncharacterized protein; tRNA (Guanine-N(7)-)-methyltransferase isoform a [Source:UniProtKB/TrEMBL;Acc:F7H363]	ENSMMUT00000031157	861	1230	+
ENSMMUG00000008513	WDR3	Uncharacterized protein [Source:UniProtKB/TrEMBL;Acc:F6WR72]	ENSMMUT00000011907	3271	3370	+
ENSMMUG00000020980	UBA7	Uncharacterized protein [Source:UniProtKB/TrEMBL;Acc:F7HMU1]	ENSMMUT00000029505	981	1130	+
ENSMMUG00000019070	FOCAD	focadhesin [Source:HGNC Symbol;Acc:HGNC:23377]	ENSMMUT00000012459	5251	5674	+
ENSMMUG00000005893	TSFM	Elongation factor Ts, mitochondrial [Source:UniProtKB/TrEMBL;Acc:F6TKZ4]	ENSMMUT00000046256	913	1170	+
ENSMMUG00000020979	FAM212A	family with sequence similarity 212, member A [Source:HGNC Symbol;Acc:HGNC:32480]	ENSMMUT00000029502	571	740	+
ENSMMUG00000014589	IP6K1	Inositol hexakisphosphate kinase 1 isoform 1; Uncharacterized protein [Source:UniProtKB/TrEMBL;Acc:F7GRE2]	ENSMMUT00000020464	1353	1782	+
ENSMMUG00000014584	GMPPB	Mannose-1-phosphate guanyltransferase beta isoform 2; Uncharacterized protein [Source:UniProtKB/TrEMBL;Acc:F7GRE3]	ENSMMUT00000020460	1401	1630	+
ENSMMUG00000005321	CTDSP2	CTD (carboxy-terminal domain, RNA polymerase II, polypeptide A) small phosphatase 2 [Source:HGNC Symbol;Acc:HGNC:17077]	ENSMMUT00000007489	1041	1693	+
ENSMMUG00000019218	XRCC6BP1	Uncharacterized protein [Source:UniProtKB/TrEMBL;Acc:F6QPF2]	ENSMMUT00000026995	491	640	+
ENSMMUG00000008325	MLLT3	Uncharacterized protein [Source:UniProtKB/TrEMBL;Acc:F7HSZ1]	ENSMMUT00000011644	1041	1170	+
ENSMMUG00000014564	RNF123	ring finger protein 123 [Source:HGNC Symbol;Acc:HGNC:21148]	ENSMMUT00000020450	4121	4280	+
ENSMMUG00000004233	LRIG3	leucine-rich repeats and immunoglobulin-like domains 3 [Source:HGNC Symbol;Acc:HGNC:30991]	ENSMMUT00000006007	3421	3630	+
ENSMMUG00000003412			ENSMMUT00000004827	1091	1289	+
ENSMMUG00000000955	USP15	Ubiquitin carboxyl-terminal hydrolase [Source:UniProtKB/TrEMBL;Acc:F6QY38]	ENSMMUT00000001366	2701	3035	+
ENSMMUG00000004338	DENND4C	DENN/MADD domain containing 4C [Source:HGNC Symbol;Acc:HGNC:26079]	ENSMMUT00000046240	2971	3120	+
ENSMMUG00000023089	PHGDH	phosphoglycerate dehydrogenase [Source:HGNC Symbol;Acc:HGNC:8923]	ENSMMUT00000046237	3071	3170	+
ENSMMUG00000000956	MON2	MON2 homolog (S. cerevisiae) [Source:HGNC Symbol;Acc:HGNC:29177]	ENSMMUT00000001368	4561	4720	+
ENSMMUG00000018396	HAUS6	Uncharacterized protein [Source:UniProtKB/TrEMBL;Acc:F7GZC3]	ENSMMUT00000025855	2911	3200	+
ENSMMUG00000018395	RRAGA	Uncharacterized protein [Source:UniProtKB/TrEMBL;Acc:F7GZF7]	ENSMMUT00000025851	131	430	+
ENSMMUG00000001955	C11H12ORF66	Uncharacterized protein [Source:UniProtKB/TrEMBL;Acc:F6VH90]	ENSMMUT00000002768	711	1500	+
ENSMMUG00000018375	NOTCH2	Uncharacterized protein [Source:UniProtKB/TrEMBL;Acc:F7DFJ1]	ENSMMUT00000025824	7620	8090	+
ENSMMUG00000014540	APEH	Acylamino-acid-releasing enzyme; Uncharacterized protein [Source:UniProtKB/TrEMBL;Acc:F7G744]	ENSMMUT00000020403	2628	2779	+
ENSMMUG00000002664			ENSMMUT00000016990	1186	1307	+
ENSMMUG00000007659	XPOT	exportin, tRNA [Source:HGNC Symbol;Acc:HGNC:12826]	ENSMMUT00000046231	1931	2270	+
ENSMMUG00000012707	SEC22B	Uncharacterized protein; Vesicle-trafficking protein SEC22b [Source:UniProtKB/TrEMBL;Acc:F7DJM1]	ENSMMUT00000017815	781	950	+
ENSMMUG00000004683	DAG1	Dystroglycan preproprotein; Uncharacterized protein [Source:UniProtKB/TrEMBL;Acc:F6RU72]	ENSMMUT00000006615	3301	3480	+
ENSMMUG00000031778		Uncharacterized protein [Source:UniProtKB/TrEMBL;Acc:F6VZC4]	ENSMMUT00000015968	261	370	+
ENSMMUG00000019640	GPR89B	Golgi pH regulator B; Uncharacterized protein [Source:UniProtKB/TrEMBL;Acc:F7D013]	ENSMMUT00000027588	1671	1887	+
ENSMMUG00000000822	USP4	ubiquitin specific peptidase 4 (proto-oncogene) [Source:HGNC Symbol;Acc:HGNC:12627]	ENSMMUT00000001187	2821	2990	+
ENSMMUG00000023229	RASSF3	Uncharacterized protein [Source:UniProtKB/TrEMBL;Acc:F7E6U8]	ENSMMUT00000032674	1	110	+
ENSMMUG00000006481	GNS	N-acetylglucosamine-6-sulfatase; Uncharacterized protein [Source:UniProtKB/TrEMBL;Acc:F7HBI0]	ENSMMUT00000009088	1842	2094	+
ENSMMUG00000016736	RNF115	Uncharacterized protein [Source:UniProtKB/TrEMBL;Acc:F6V5Y8]	ENSMMUT00000023511	973	1228	+
ENSMMUG00000016892	LEMD3	Inner nuclear membrane protein Man1 isoform 1; Uncharacterized protein [Source:UniProtKB/TrEMBL;Acc:F7CQM6]	ENSMMUT00000023726	2651	2770	+
ENSMMUG00000002833	KLHDC8B	Uncharacterized protein [Source:UniProtKB/TrEMBL;Acc:F7H011]	ENSMMUT00000004012	1641	1830	+
ENSMMUG00000016735	POLR3C	Uncharacterized protein [Source:UniProtKB/TrEMBL;Acc:F6V621]	ENSMMUT00000023509	1641	1835	+
ENSMMUG00000016621	TMBIM4	Uncharacterized protein [Source:UniProtKB/TrEMBL;Acc:F6TPJ2]	ENSMMUT00000023356	581	844	+
ENSMMUG00000002948	USP19	ubiquitin specific peptidase 19 [Source:HGNC Symbol;Acc:HGNC:12617]	ENSMMUT00000004176	1441	1650	+
ENSMMUG00000031768	RPL17	ribosomal protein L17 [Source:HGNC Symbol;Acc:HGNC:10307]	ENSMMUT00000046206	421	520	+
ENSMMUG00000005660	QRICH1	glutamine-rich 1 [Source:HGNC Symbol;Acc:HGNC:24713]	ENSMMUT00000007959	761	960	+
ENSMMUG00000008300	CAND1	Cullin-associated NEDD8-dissociated protein 1; Cullin-associated and neddylation-dissociated protein 1; Uncharacterized protein [Source:UniProtKB/TrEMBL;Acc:F7H6Z9]	ENSMMUT00000011609	3922	4142	+
ENSMMUG00000005656	IMPDH2	Inosine-5'-monophosphate dehydrogenase [Source:UniProtKB/TrEMBL;Acc:F6VXT4]	ENSMMUT00000007958	511	850	+
ENSMMUG00000011650	DYRK2	Uncharacterized protein [Source:UniProtKB/TrEMBL;Acc:F6PSZ0]	ENSMMUT00000016324	1861	2060	+
ENSMMUG00000016048	PEX11B	peroxisomal biogenesis factor 11 beta [Source:HGNC Symbol;Acc:HGNC:8853]	ENSMMUT00000022564	431	600	+
ENSMMUG00000002920		Uncharacterized protein [Source:UniProtKB/TrEMBL;Acc:F6PTJ8]	ENSMMUT00000004143	401	521	+
ENSMMUG00000005649	WDR6	Uncharacterized protein [Source:UniProtKB/TrEMBL;Acc:F6W4V1]	ENSMMUT00000007942	2151	2380	+
ENSMMUG00000018725	MDM1	Uncharacterized protein [Source:UniProtKB/TrEMBL;Acc:F6YB04]	ENSMMUT00000026320	341	630	+
ENSMMUG00000006130	P4HTM	prolyl 4-hydroxylase, transmembrane (endoplasmic reticulum) [Source:HGNC Symbol;Acc:HGNC:28858]	ENSMMUT00000008569	1481	1640	+
ENSMMUG00000015418	SLC25A20	Uncharacterized protein [Source:UniProtKB/TrEMBL;Acc:F6PTP5]	ENSMMUT00000021620	1371	1610	+
ENSMMUG00000011442	RAP1B	Ras-related protein Rap-1b; Ras-related protein Rap-1b isoform 1; Uncharacterized protein [Source:UniProtKB/TrEMBL;Acc:F7B9T3]	ENSMMUT00000016016	801	1040	+
ENSMMUG00000016053	LIX1L	Uncharacterized protein [Source:UniProtKB/TrEMBL;Acc:F7GPQ7]	ENSMMUT00000022573	451	692	+
ENSMMUG00000000081	PRKAR2A	protein kinase, cAMP-dependent, regulatory, type II, alpha [Source:HGNC Symbol;Acc:HGNC:9391]	ENSMMUT00000000115	1	252	+
ENSMMUG00000014186	NUP107	Uncharacterized protein [Source:UniProtKB/TrEMBL;Acc:F7AS65]	ENSMMUT00000019904	2131	2260	+
ENSMMUG00000014730	IP6K2	Uncharacterized protein [Source:UniProtKB/TrEMBL;Acc:F6PU82]	ENSMMUT00000046185	1661	1914	+
ENSMMUG00000019570			ENSMMUT00000027488	901	1037	+
ENSMMUG00000016624	TMEM261	transmembrane protein 261 [Source:HGNC Symbol;Acc:HGNC:30536]	ENSMMUT00000023359	391	580	+
ENSMMUG00000014720	NCKIPSD	Uncharacterized protein [Source:UniProtKB/TrEMBL;Acc:F7GBC7]	ENSMMUT00000020647	501	1132	+
ENSMMUG00000015985			ENSMMUT00000022476	1901	2040	+
ENSMMUG00000031754	SLC26A6	Uncharacterized protein [Source:UniProtKB/TrEMBL;Acc:F6PIY5]	ENSMMUT00000020622	2541	2710	+
ENSMMUG00000009024	CHD1L	chromodomain helicase DNA binding protein 1-like [Source:HGNC Symbol;Acc:HGNC:1916]	ENSMMUT00000012616	1715	1960	+
ENSMMUG00000014193	MDM2	Uncharacterized protein [Source:UniProtKB/TrEMBL;Acc:F7AJY5]	ENSMMUT00000019920	1021	1410	+
ENSMMUG00000002176	UHRF2	ubiquitin-like with PHD and ring finger domains 2, E3 ubiquitin protein ligase [Source:HGNC Symbol;Acc:HGNC:12557]	ENSMMUT00000003071	401	610	+
ENSMMUG00000014705	UQCRC1	Macaca mulatta ubiquinol-cytochrome c reductase core protein I (UQCRC1), mRNA. [Source:RefSeq mRNA;Acc:NM_001040119]	ENSMMUT00000020619	1471	1590	+
ENSMMUG00000005469	ERMP1	endoplasmic reticulum metallopeptidase 1 [Source:HGNC Symbol;Acc:HGNC:23703]	ENSMMUT00000007705	2	573	+
ENSMMUG00000009020	KIAA1432	Uncharacterized protein [Source:UniProtKB/TrEMBL;Acc:F7FH62]	ENSMMUT00000012605	2053	2468	+
ENSMMUG00000002921	CPSF6	Cleavage and polyadenylation specificity factor subunit 6; Uncharacterized protein [Source:UniProtKB/TrEMBL;Acc:F7H1Q9]	ENSMMUT00000004145	1821	1976	+
ENSMMUG00000016786	BCL9	B-cell CLL/lymphoma 9 protein; Uncharacterized protein [Source:UniProtKB/TrEMBL;Acc:F7D4Z2]	ENSMMUT00000023584	5111	5220	+
ENSMMUG00000013561	ACP6	Lysophosphatidic acid phosphatase type 6; Uncharacterized protein [Source:UniProtKB/TrEMBL;Acc:F6PJQ1]	ENSMMUT00000046160	1681	1792	+
ENSMMUG00000006197	PLGRKT	Transmembrane protein C9orf46; Uncharacterized protein [Source:UniProtKB/TrEMBL;Acc:F7HNT6]	ENSMMUT00000008670	551	694	+
ENSMMUG00000006196			ENSMMUT00000008668	538	690	+
ENSMMUG00000014558	JAK2	Tyrosine-protein kinase [Source:UniProtKB/TrEMBL;Acc:F7GT47]	ENSMMUT00000020426	3831	4000	+
ENSMMUG00000000502			ENSMMUT00000000738	986	1147	+
ENSMMUG00000006716	RCL1	Uncharacterized protein [Source:UniProtKB/TrEMBL;Acc:F7BDP3]	ENSMMUT00000009404	1171	1428	+
ENSMMUG00000000143	AK3	GTP:AMP phosphotransferase, mitochondrial isoform a; Uncharacterized protein [Source:UniProtKB/TrEMBL;Acc:F7H3S6]	ENSMMUT00000000204	1961	2112	+
ENSMMUG00000000591	PFKFB4	Uncharacterized protein [Source:UniProtKB/TrEMBL;Acc:F6ZP74]	ENSMMUT00000000856	951	1160	+
ENSMMUG00000007258	BOLA1	BolA-like protein 1; Uncharacterized protein [Source:UniProtKB/TrEMBL;Acc:F7FGU2]	ENSMMUT00000010138	351	510	+
ENSMMUG00000007256	SF3B4	Splicing factor 3B subunit 4; Uncharacterized protein [Source:UniProtKB/TrEMBL;Acc:F7FGV3]	ENSMMUT00000010136	881	1070	+
ENSMMUG00000014853	CNOT2	CCR4-NOT transcription complex subunit 2; CCR4-associated factor 2; Uncharacterized protein [Source:UniProtKB/TrEMBL;Acc:F7BE69]	ENSMMUT00000046139	2221	2380	+
ENSMMUG00000002362	KIAA0020	KIAA0020 [Source:HGNC Symbol;Acc:HGNC:29676]	ENSMMUT00000003348	1541	1640	+
ENSMMUG00000003078	NME6	NME/NM23 nucleoside diphosphate kinase 6 [Source:HGNC Symbol;Acc:HGNC:20567]	ENSMMUT00000004358	421	570	+
ENSMMUG00000013681	PLEKHO1	Uncharacterized protein [Source:UniProtKB/TrEMBL;Acc:F7BER0]	ENSMMUT00000019215	1441	1631	+
ENSMMUG00000003823	MAP4	microtubule-associated protein 4 [Source:HGNC Symbol;Acc:HGNC:6862]	ENSMMUT00000005407	581	690	+
ENSMMUG00000021531	ANP32E	acidic (leucine-rich) nuclear phosphoprotein 32 family, member E [Source:HGNC Symbol;Acc:HGNC:16673]	ENSMMUT00000017513	341	789	+
ENSMMUG00000015279	SMARCA2	Uncharacterized protein [Source:UniProtKB/TrEMBL;Acc:F7BEV7]	ENSMMUT00000021425	3491	3640	+
ENSMMUG00000020942	LGR5	Uncharacterized protein [Source:UniProtKB/TrEMBL;Acc:F7BF56]	ENSMMUT00000029451	2471	2830	+
ENSMMUG00000003820	DHX30	Uncharacterized protein [Source:UniProtKB/TrEMBL;Acc:F7HRB8]	ENSMMUT00000005402	1331	2060	+
ENSMMUG00000021386	APH1A	Uncharacterized protein [Source:UniProtKB/TrEMBL;Acc:F7FDJ2]	ENSMMUT00000030104	1311	1460	+
ENSMMUG00000020943	ZFC3H1	zinc finger, C3H1-type containing [Source:HGNC Symbol;Acc:HGNC:28328]	ENSMMUT00000029452	6721	6869	+
ENSMMUG00000009345	SMARCC1	Uncharacterized protein [Source:UniProtKB/TrEMBL;Acc:F7HJG9]	ENSMMUT00000013058	2321	2450	+
ENSMMUG00000013385	C3ORF75	Uncharacterized protein [Source:UniProtKB/TrEMBL;Acc:F7AB69]	ENSMMUT00000018775	721	890	+
ENSMMUG00000014046	SCAP	SREBF chaperone [Source:HGNC Symbol;Acc:HGNC:30634]	ENSMMUT00000019716	3740	3921	+
ENSMMUG00000016976	DOCK8	Uncharacterized protein [Source:UniProtKB/TrEMBL;Acc:F7AZW3]	ENSMMUT00000023857	6171	6710	+
ENSMMUG00000007303	RPRD2	regulation of nuclear pre-mRNA domain containing 2 [Source:HGNC Symbol;Acc:HGNC:29039]	ENSMMUT00000010201	2841	3040	+
ENSMMUG00000007727	TBC1D15	TBC1 domain family, member 15 [Source:HGNC Symbol;Acc:HGNC:25694]	ENSMMUT00000010816	821	1250	+
ENSMMUG00000006256	TARS2	threonyl-tRNA synthetase 2, mitochondrial (putative) [Source:HGNC Symbol;Acc:HGNC:30740]	ENSMMUT00000008757	2031	2260	+
ENSMMUG00000014045	PTPN23	protein tyrosine phosphatase, non-receptor type 23 [Source:HGNC Symbol;Acc:HGNC:14406]	ENSMMUT00000019713	4861	5020	+
ENSMMUG00000009638	GLIPR1	Glioma pathogenesis-related protein 1; Uncharacterized protein [Source:UniProtKB/TrEMBL;Acc:F6YQN5]	ENSMMUT00000013458	311	580	+
ENSMMUG00000009640	KRR1	KRR1 small subunit processome component [Source:UniProtKB/TrEMBL;Acc:F6YQM6]	ENSMMUT00000013459	1021	1230	+
ENSMMUG00000008221	MCL1	Induced myeloid leukemia cell differentiation protein Mcl-1 isoform 1; Uncharacterized protein [Source:UniProtKB/TrEMBL;Acc:F7HUE9]	ENSMMUT00000011489	561	1320	+
ENSMMUG00000011856		Uncharacterized protein [Source:UniProtKB/TrEMBL;Acc:F7BLR5]	ENSMMUT00000016606	781	896	+
ENSMMUG00000015583		Uncharacterized protein [Source:UniProtKB/TrEMBL;Acc:F6TEK2]	ENSMMUT00000046092	421	540	+
ENSMMUG00000019813	NBEAL2	Uncharacterized protein [Source:UniProtKB/TrEMBL;Acc:F7BMD6]	ENSMMUT00000027846	5211	5370	+
ENSMMUG00000000541	ARNT	aryl hydrocarbon receptor nuclear translocator [Source:HGNC Symbol;Acc:HGNC:700]	ENSMMUT00000000789	2421	2540	+
ENSMMUG00000017862	BBS10	Bardet-Biedl syndrome 10 [Source:HGNC Symbol;Acc:HGNC:26291]	ENSMMUT00000025102	261	590	+
ENSMMUG00000017864	OSBPL8	Oxysterol-binding protein [Source:UniProtKB/TrEMBL;Acc:F7DPV1]	ENSMMUT00000025106	1441	1690	+
ENSMMUG00000023235	SETDB1	SET domain, bifurcated 1 [Source:HGNC Symbol;Acc:HGNC:10761]	ENSMMUT00000032683	2671	3030	+
ENSMMUG00000023234	LASS2	Uncharacterized protein [Source:UniProtKB/TrEMBL;Acc:F7BTC4]	ENSMMUT00000032680	1201	1454	+
ENSMMUG00000012603	FAM122A	Protein FAM122A; Putative uncharacterized protein FAM122A; Uncharacterized protein [Source:UniProtKB/TrEMBL;Acc:F7F9H1]	ENSMMUT00000017668	871	1070	+
ENSMMUG00000003780	TJP2	tight junction protein 2 [Source:HGNC Symbol;Acc:HGNC:11828]	ENSMMUT00000009605	631	970	+
ENSMMUG00000010068	PRUNE	Uncharacterized protein [Source:UniProtKB/TrEMBL;Acc:F6T7H8]	ENSMMUT00000014058	1201	1658	+
ENSMMUG00000003132	PTAR1	Uncharacterized protein [Source:UniProtKB/TrEMBL;Acc:F7BU18]	ENSMMUT00000004437	939	1130	+
ENSMMUG00000002130	SACM1L	Uncharacterized protein [Source:UniProtKB/TrEMBL;Acc:F6UPL3]	ENSMMUT00000046057	2381	2540	+
ENSMMUG00000010074	CDC42SE1	CDC42 small effector protein 1; Uncharacterized protein [Source:UniProtKB/TrEMBL;Acc:F6T0R1]	ENSMMUT00000014064	331	570	+
ENSMMUG00000010711	LIMD1	LIM domains containing 1 [Source:HGNC Symbol;Acc:HGNC:6612]	ENSMMUT00000014982	261	500	+
ENSMMUG00000000225	KLF9	Krueppel-like factor 9; Uncharacterized protein [Source:UniProtKB/TrEMBL;Acc:F6XHI0]	ENSMMUT00000000337	41	340	+
ENSMMUG00000018020	LARS2	leucyl-tRNA synthetase 2, mitochondrial [Source:HGNC Symbol;Acc:HGNC:17095]	ENSMMUT00000025310	2741	3260	+
ENSMMUG00000005742	CDCP1	CUB domain containing protein 1 [Source:HGNC Symbol;Acc:HGNC:24357]	ENSMMUT00000008062	2901	3060	+
ENSMMUG00000007898	LYSMD1	LysM and putative peptidoglycan-binding domain-containing protein 1 isoform a; Uncharacterized protein [Source:UniProtKB/TrEMBL;Acc:F7AZF7]	ENSMMUT00000011059	1181	1400	+
ENSMMUG00000007900	SCNM1	Sodium channel modifier 1 isoform 1; Uncharacterized protein [Source:UniProtKB/TrEMBL;Acc:F6PSF1]	ENSMMUT00000011062	681	840	+
ENSMMUG00000019130	EXOSC7	Exosome complex component RRP42; Uncharacterized protein [Source:UniProtKB/TrEMBL;Acc:F6T0A2]	ENSMMUT00000046049	821	1060	+
ENSMMUG00000019214	PPP1R12A	Uncharacterized protein [Source:UniProtKB/TrEMBL;Acc:F6QPC9]	ENSMMUT00000026990	3081	3320	+
ENSMMUG00000019740	ZDHHC3	Palmitoyltransferase ZDHHC3 isoform 1; Uncharacterized protein [Source:UniProtKB/TrEMBL;Acc:F7AYQ9]	ENSMMUT00000027743	1439	1890	+
ENSMMUG00000005228	PSMD4	Macaca mulatta proteasome (prosome, macropain) 26S subunit, non-ATPase, 4 (PSMD4), mRNA. [Source:RefSeq mRNA;Acc:NM_001136568]	ENSMMUT00000046046	2511	2700	+
ENSMMUG00000013166	ZNF687	Uncharacterized protein [Source:UniProtKB/TrEMBL;Acc:F6Z211]	ENSMMUT00000046043	1921	2040	+
ENSMMUG00000003650	TMEM42	Transmembrane protein 42; Uncharacterized protein [Source:UniProtKB/TrEMBL;Acc:F6PXS8]	ENSMMUT00000005166	421	680	+
ENSMMUG00000013170	PI4KB	Uncharacterized protein [Source:UniProtKB/TrEMBL;Acc:F6XXW9]	ENSMMUT00000018476	2921	3200	+
ENSMMUG00000020924	PSMB4	Proteasome subunit beta type [Source:UniProtKB/TrEMBL;Acc:F7H4P3]	ENSMMUT00000029425	12	210	+
ENSMMUG00000002357	TMEM2	Uncharacterized protein [Source:UniProtKB/TrEMBL;Acc:F7C0J3]	ENSMMUT00000003340	401	890	+
ENSMMUG00000019196	GDA	Uncharacterized protein [Source:UniProtKB/TrEMBL;Acc:F7CWR5]	ENSMMUT00000046029	881	990	+
ENSMMUG00000020925	POGZ	Pogo transposable element with ZNF domain isoform 1; Uncharacterized protein [Source:UniProtKB/TrEMBL;Acc:F7H4N3]	ENSMMUT00000029430	5871	6020	+
ENSMMUG00000011305	TMTC2	Transmembrane and TPR repeat-containing protein 2; Uncharacterized protein [Source:UniProtKB/TrEMBL;Acc:F6UNE9]	ENSMMUT00000015823	881	1030	+
ENSMMUG00000001096	TCAIM	T cell activation inhibitor, mitochondrial [Source:HGNC Symbol;Acc:HGNC:25241]	ENSMMUT00000001553	1331	1460	+
ENSMMUG00000023124	TMEM43	transmembrane protein 43 [Source:HGNC Symbol;Acc:HGNC:28472]	ENSMMUT00000046004	1091	1200	+
ENSMMUG00000012667	ANXA1	Annexin [Source:UniProtKB/TrEMBL;Acc:F7D2H1]	ENSMMUT00000045992	1291	1400	+
ENSMMUG00000001029	ANO10	anoctamin 10 [Source:HGNC Symbol;Acc:HGNC:25519]	ENSMMUT00000001467	931	1110	+
ENSMMUG00000001028	SNRK	Uncharacterized protein [Source:UniProtKB/TrEMBL;Acc:F6SIC4]	ENSMMUT00000001465	2351	2490	+
ENSMMUG00000006340	SLC6A6	Transporter [Source:UniProtKB/TrEMBL;Acc:F7D2B9]	ENSMMUT00000008890	81	230	+
ENSMMUG00000014777	C11H3ORF19	Uncharacterized protein [Source:UniProtKB/TrEMBL;Acc:F6WDL1]	ENSMMUT00000020732	1231	1410	+
ENSMMUG00000014780	C3orf20	chromosome 3 open reading frame 20 [Source:HGNC Symbol;Acc:HGNC:25320]	ENSMMUT00000045987	3131	3270	+
ENSMMUG00000021242	NKTR	natural killer cell triggering receptor [Source:HGNC Symbol;Acc:HGNC:7833]	ENSMMUT00000029888	2511	2810	+
ENSMMUG00000005156	NR2C2	nuclear receptor subfamily 2, group C, member 2 [Source:HGNC Symbol;Acc:HGNC:7972]	ENSMMUT00000007264	1631	1840	+
ENSMMUG00000005158	ZFYVE20	zinc finger, FYVE domain containing 20 [Source:HGNC Symbol;Acc:HGNC:20759]	ENSMMUT00000007266	2231	2340	+
ENSMMUG00000001075		Uncharacterized protein [Source:UniProtKB/TrEMBL;Acc:F6QMK0]	ENSMMUT00000001528	2151	2400	+
ENSMMUG00000014627	CTNNB1	Uncharacterized protein [Source:UniProtKB/TrEMBL;Acc:F6VB10]	ENSMMUT00000020513	2865	3125	+
ENSMMUG00000019754	VPS13A	Uncharacterized protein [Source:UniProtKB/TrEMBL;Acc:F6VC84]	ENSMMUT00000027775	9461	9635	+
ENSMMUG00000008146	CHTOP	Uncharacterized protein [Source:UniProtKB/TrEMBL;Acc:F6VBS9]	ENSMMUT00000011381	1101	1240	+
ENSMMUG00000022965		Uncharacterized protein [Source:UniProtKB/TrEMBL;Acc:F6U6B5]	ENSMMUT00000032328	671	850	+
ENSMMUG00000008148	SNAPIN	SNARE-associated protein Snapin; Uncharacterized protein [Source:UniProtKB/TrEMBL;Acc:F7HGD6]	ENSMMUT00000011382	391	670	+
ENSMMUG00000008149	ILF2	Uncharacterized protein [Source:UniProtKB/TrEMBL;Acc:F7HE92]	ENSMMUT00000011384	1060	1400	+
ENSMMUG00000013171	H1FX	Histone H1x; Uncharacterized protein [Source:UniProtKB/TrEMBL;Acc:F6Z1X9]	ENSMMUT00000018474	811	1000	+
ENSMMUG00000013167	C11H3ORF37	Uncharacterized protein [Source:UniProtKB/TrEMBL;Acc:F6Z1Y7]	ENSMMUT00000018473	1191	1410	+
ENSMMUG00000022963	SLC25A38	Uncharacterized protein [Source:UniProtKB/TrEMBL;Acc:F6U6E7]	ENSMMUT00000032324	561	900	+
ENSMMUG00000011585	CNBP	Cellular nucleic acid-binding protein isoform 3; Uncharacterized protein [Source:UniProtKB/TrEMBL;Acc:F6PPB3]	ENSMMUT00000016234	1091	1290	+
ENSMMUG00000020147	CSRNP1	Uncharacterized protein [Source:UniProtKB/TrEMBL;Acc:F6TYP2]	ENSMMUT00000028348	1861	2060	+
ENSMMUG00000020144	GORASP1	Uncharacterized protein [Source:UniProtKB/TrEMBL;Acc:F6TYT5]	ENSMMUT00000028343	1111	1340	+
ENSMMUG00000006338	ACAD9	Uncharacterized protein [Source:UniProtKB/TrEMBL;Acc:F7HE77]	ENSMMUT00000008889	2053	2350	+
ENSMMUG00000019482	INTS3	Uncharacterized protein [Source:UniProtKB/TrEMBL;Acc:F7D405]	ENSMMUT00000027376	4011	4190	+
ENSMMUG00000023365	TLE4	transducin-like enhancer of split 4 [Source:HGNC Symbol;Acc:HGNC:11840]	ENSMMUT00000006540	3131	3250	+
ENSMMUG00000020138	WDR48	Uncharacterized protein [Source:UniProtKB/TrEMBL;Acc:F6TZL8]	ENSMMUT00000028339	2052	2474	+
ENSMMUG00000001798		Uncharacterized protein [Source:UniProtKB/TrEMBL;Acc:F6VCG1]	ENSMMUT00000002528	871	980	+
ENSMMUG00000018663	EEFSEC	eukaryotic elongation factor, selenocysteine-tRNA-specific [Source:HGNC Symbol;Acc:HGNC:24614]	ENSMMUT00000026235	971	1450	+
ENSMMUG00000018662	RUVBL1	Uncharacterized protein [Source:UniProtKB/TrEMBL;Acc:F6VIT7]	ENSMMUT00000045922	891	1050	+
ENSMMUG00000018661	SEC61A1	Sec61 alpha 1 subunit (S. cerevisiae) [Source:HGNC Symbol;Acc:HGNC:18276]	ENSMMUT00000026233	2351	2630	+
ENSMMUG00000002696	GATAD2B	GATA zinc finger domain containing 2B [Source:HGNC Symbol;Acc:HGNC:30778]	ENSMMUT00000003838	91	295	+
ENSMMUG00000019931	UBQLN1	ubiquilin 1 [Source:HGNC Symbol;Acc:HGNC:12508]	ENSMMUT00000027997	311	540	+
ENSMMUG00000005002	DENND4B	DENN/MADD domain containing 4B [Source:HGNC Symbol;Acc:HGNC:29044]	ENSMMUT00000007052	4521	4780	+
ENSMMUG00000018792	EXOG	endo/exonuclease (5'-3'), endonuclease G-like [Source:HGNC Symbol;Acc:HGNC:3347]	ENSMMUT00000026426	751	1080	+
ENSMMUG00000018790	ACVR2B	Uncharacterized protein [Source:UniProtKB/TrEMBL;Acc:F6ZPM8]	ENSMMUT00000026424	1351	1540	+
ENSMMUG00000005005	CRTC2	Uncharacterized protein [Source:UniProtKB/TrEMBL;Acc:F6VJE1]	ENSMMUT00000007054	1201	1410	+
ENSMMUG00000000166	ABTB1	Uncharacterized protein [Source:UniProtKB/TrEMBL;Acc:F7HLS9]	ENSMMUT00000000243	1231	1510	+
ENSMMUG00000005007	SLC39A1	Uncharacterized protein; Zinc transporter ZIP1 [Source:UniProtKB/TrEMBL;Acc:F7AMB0]	ENSMMUT00000007057	921	1160	+
ENSMMUG00000000996	OXSR1	Serine/threonine-protein kinase OSR1; Uncharacterized protein [Source:UniProtKB/TrEMBL;Acc:F6SQU7]	ENSMMUT00000001423	1221	1330	+
ENSMMUG00000000158	MCM2	minichromosome maintenance complex component 2 [Source:HGNC Symbol;Acc:HGNC:6944]	ENSMMUT00000000234	2697	2962	+
ENSMMUG00000005010	JTB	jumping translocation breakpoint [Source:HGNC Symbol;Acc:HGNC:6201]	ENSMMUT00000007064	821	983	+
ENSMMUG00000000756	TPRA1	Uncharacterized protein [Source:UniProtKB/TrEMBL;Acc:F6RK16]	ENSMMUT00000001090	1251	1600	+
ENSMMUG00000000995	MYD88	Macaca mulatta myeloid differentiation primary response gene (88) (MYD88), mRNA. [Source:RefSeq mRNA;Acc:NM_001130681]	ENSMMUT00000001422	1151	1270	+
ENSMMUG00000000990	ACAA1	Uncharacterized protein [Source:UniProtKB/TrEMBL;Acc:F6SR59]	ENSMMUT00000001420	1501	1761	+
ENSMMUG00000010805	TPM3	tropomyosin 3 [Source:HGNC Symbol;Acc:HGNC:12012]	ENSMMUT00000015105	565	830	+
ENSMMUG00000008801	AGTPBP1	Uncharacterized protein [Source:UniProtKB/TrEMBL;Acc:F6VRN6]	ENSMMUT00000012318	1421	1900	+
ENSMMUG00000015864	TMTC3	transmembrane and tetratricopeptide repeat containing 3 [Source:HGNC Symbol;Acc:HGNC:26899]	ENSMMUT00000045898	2161	2260	+
ENSMMUG00000001275			ENSMMUT00000001807	481	804	+
ENSMMUG00000010808	C1orf43	chromosome 1 open reading frame 43 [Source:HGNC Symbol;Acc:HGNC:29876]	ENSMMUT00000015112	741	1127	+
ENSMMUG00000001898	NAA35	Uncharacterized protein [Source:UniProtKB/TrEMBL;Acc:F7FX45]	ENSMMUT00000002682	741	860	+
ENSMMUG00000010810	UBAP2L	Ubiquitin-associated protein 2-like isoform b; Uncharacterized protein [Source:UniProtKB/TrEMBL;Acc:F6VRQ3]	ENSMMUT00000015117	2111	2220	+
ENSMMUG00000003574	POC1B	Uncharacterized protein [Source:UniProtKB/TrEMBL;Acc:F6VRP4]	ENSMMUT00000005055	1331	1831	+
ENSMMUG00000003399	ISCA1	Iron-sulfur cluster assembly 1 homolog, mitochondrial; Uncharacterized protein [Source:UniProtKB/TrEMBL;Acc:F7FEI1]	ENSMMUT00000004809	741	880	+
ENSMMUG00000003401	ZCCHC6	zinc finger, CCHC domain containing 6 [Source:HGNC Symbol;Acc:HGNC:25817]	ENSMMUT00000004824	5431	5570	+
ENSMMUG00000023364	ATP8B2	ATPase, aminophospholipid transporter, class I, type 8B, member 2 [Source:HGNC Symbol;Acc:HGNC:13534]	ENSMMUT00000032874	3529	3950	+
ENSMMUG00000003411		Thioredoxin [Source:UniProtKB/TrEMBL;Acc:F7FDU7]	ENSMMUT00000004826	1	100	+
ENSMMUG00000017053	DAPK1	Death-associated protein kinase 1; Uncharacterized protein [Source:UniProtKB/TrEMBL;Acc:F7HLL1]	ENSMMUT00000023978	4711	4848	+
ENSMMUG00000016995	LUM	Keratan sulfate proteoglycan lumican; Lumican; Uncharacterized protein [Source:UniProtKB/TrEMBL;Acc:F6PRP0]	ENSMMUT00000023883	471	590	+
ENSMMUG00000017609	CTSL	cathepsin L [Source:HGNC Symbol;Acc:HGNC:2537]	ENSMMUT00000024761	1381	1480	+
ENSMMUG00000022978	IL6R	Uncharacterized protein [Source:UniProtKB/TrEMBL;Acc:F6U605]	ENSMMUT00000032343	1521	1770	+
ENSMMUG00000019547	UBE2Q1	ubiquitin-conjugating enzyme E2Q family member 1 [Source:HGNC Symbol;Acc:HGNC:15698]	ENSMMUT00000027456	1181	1515	+
ENSMMUG00000016093	ADAR	Uncharacterized protein [Source:UniProtKB/TrEMBL;Acc:F7GLF8]	ENSMMUT00000022629	3572	3863	+
ENSMMUG00000009555	BTG1	Protein BTG1; Uncharacterized protein [Source:UniProtKB/TrEMBL;Acc:F6Y7P5]	ENSMMUT00000013333	471	840	+
ENSMMUG00000017793	KCNN3	potassium intermediate/small conductance calcium-activated channel, subfamily N, member 3 [Source:HGNC Symbol;Acc:HGNC:6292]	ENSMMUT00000025006	731	950	+
ENSMMUG00000012532	SECISBP2	SECIS binding protein 2 [Source:HGNC Symbol;Acc:HGNC:30972]	ENSMMUT00000017569	2601	2790	+
ENSMMUG00000002027	PMVK	phosphomevalonate kinase [Source:HGNC Symbol;Acc:HGNC:9141]	ENSMMUT00000002868	791	940	+
ENSMMUG00000006576	PBXIP1	pre-B-cell leukemia homeobox interacting protein 1 [Source:HGNC Symbol;Acc:HGNC:21199]	ENSMMUT00000009208	1331	1490	+
ENSMMUG00000006579	PYGO2	pygopus family PHD finger 2 [Source:HGNC Symbol;Acc:HGNC:30257]	ENSMMUT00000009211	1231	1660	+
ENSMMUG00000008629	SEMA4D	sema domain, immunoglobulin domain (Ig), transmembrane domain (TM) and short cytoplasmic domain, (semaphorin) 4D [Source:HGNC Symbol;Acc:HGNC:10732]	ENSMMUT00000012067	4001	4399	+
ENSMMUG00000006581	SHC1	Uncharacterized protein [Source:UniProtKB/TrEMBL;Acc:F6VZ20]	ENSMMUT00000009213	1861	2050	+
ENSMMUG00000015917	ST6GALNAC4	Uncharacterized protein [Source:UniProtKB/TrEMBL;Acc:F6VZ33]	ENSMMUT00000045870	911	1156	+
ENSMMUG00000006584	FLAD1	Uncharacterized protein [Source:UniProtKB/TrEMBL;Acc:F6VZZ3]	ENSMMUT00000045867	661	980	+
ENSMMUG00000018258	PTGES2	prostaglandin E synthase 2 [Source:HGNC Symbol;Acc:HGNC:17822]	ENSMMUT00000025656	751	960	+
ENSMMUG00000004053	ZBTB7B	Uncharacterized protein [Source:UniProtKB/TrEMBL;Acc:F6W012]	ENSMMUT00000005752	1711	1840	+
ENSMMUG00000014375	FAM102A	Early estrogen-induced gene 1 protein; Early estrogen-induced gene 1 protein isoform a; Uncharacterized protein [Source:UniProtKB/TrEMBL;Acc:F7CLX8]	ENSMMUT00000020172	1261	1680	+
ENSMMUG00000013610	ETV5	Uncharacterized protein [Source:UniProtKB/TrEMBL;Acc:F7GSQ6]	ENSMMUT00000019110	551	780	+
ENSMMUG00000014374	DPM2	Uncharacterized protein [Source:UniProtKB/TrEMBL;Acc:F7CLY7]	ENSMMUT00000020171	1271	1540	+
ENSMMUG00000001185	TRA2B	Uncharacterized protein [Source:UniProtKB/TrEMBL;Acc:F6R8W2]	ENSMMUT00000001680	1	190	+
ENSMMUG00000018686	ST6GALNAC6	Alpha-N-acetylgalactosaminide alpha-2,6-sialyltransferase 6; Uncharacterized protein [Source:UniProtKB/TrEMBL;Acc:F6ZS86]	ENSMMUT00000026270	921	1030	+
ENSMMUG00000023340	ADAM15	ADAM metallopeptidase domain 15 [Source:HGNC Symbol;Acc:HGNC:193]	ENSMMUT00000032837	2571	2806	+
ENSMMUG00000018903	VEZT	Uncharacterized protein [Source:UniProtKB/TrEMBL;Acc:F6TT91]	ENSMMUT00000026576	2211	2460	+
ENSMMUG00000013813	METAP2	Methionine aminopeptidase [Source:UniProtKB/TrEMBL;Acc:F6T624]	ENSMMUT00000045854	1571	1710	+
ENSMMUG00000013018	SENP2	SUMO1/sentrin/SMT3 specific peptidase 2 [Source:HGNC Symbol;Acc:HGNC:23116]	ENSMMUT00000018259	2531	2730	+
ENSMMUG00000013195	CDK9	Uncharacterized protein [Source:UniProtKB/TrEMBL;Acc:F6XP46]	ENSMMUT00000018509	1481	1650	+
ENSMMUG00000000521	NTN4	Uncharacterized protein [Source:UniProtKB/TrEMBL;Acc:F7A3Z5]	ENSMMUT00000000765	2871	3046	+
ENSMMUG00000000425	VPS8	vacuolar protein sorting 8 homolog (S. cerevisiae) [Source:HGNC Symbol;Acc:HGNC:29122]	ENSMMUT00000000624	4541	4939	+
ENSMMUG00000013219	SLC50A1	Uncharacterized protein [Source:UniProtKB/TrEMBL;Acc:F6TTJ4]	ENSMMUT00000018542	1181	1296	+
ENSMMUG00000016424	PTRH1	Putative peptidyl-tRNA hydrolase; Uncharacterized protein [Source:UniProtKB/TrEMBL;Acc:F7FKW9]	ENSMMUT00000023062	2071	2260	+
ENSMMUG00000012180	KRTCAP2	Uncharacterized protein [Source:UniProtKB/TrEMBL;Acc:F7HTS8]	ENSMMUT00000017057	391	532	+
ENSMMUG00000009312	LTA4H	leukotriene A4 hydrolase [Source:HGNC Symbol;Acc:HGNC:6710]	ENSMMUT00000013015	151	310	+
ENSMMUG00000002953	MAGEF1	melanoma antigen family F, 1 [Source:HGNC Symbol;Acc:HGNC:29639]	ENSMMUT00000004181	561	700	+
ENSMMUG00000031625			ENSMMUT00000045839	1	120	+
ENSMMUG00000015902	CDK17	Cyclin-dependent kinase 17 isoform 1; Uncharacterized protein [Source:UniProtKB/TrEMBL;Acc:F7ATI3]	ENSMMUT00000022345	1571	1827	+
ENSMMUG00000004093	NEDD1	neural precursor cell expressed, developmentally down-regulated 1 [Source:HGNC Symbol;Acc:HGNC:7723]	ENSMMUT00000045826	2111	2350	+
ENSMMUG00000012167	SLC2A8	Solute carrier family 2, facilitated glucose transporter member 8; Uncharacterized protein [Source:UniProtKB/TrEMBL;Acc:F6TU81]	ENSMMUT00000045822	1371	1621	+
ENSMMUG00000008506	MTX1	Uncharacterized protein [Source:UniProtKB/TrEMBL;Acc:F6TU71]	ENSMMUT00000011889	1321	1529	+
ENSMMUG00000007524	POLR2H	polymerase (RNA) II (DNA directed) polypeptide H [Source:HGNC Symbol;Acc:HGNC:9195]	ENSMMUT00000010524	1520	1670	+
ENSMMUG00000023719	TMPO	Thymopoietin isoform alpha; Uncharacterized protein [Source:UniProtKB/TrEMBL;Acc:F7HAU0]	ENSMMUT00000033382	781	920	+
ENSMMUG00000008507			ENSMMUT00000011892	881	1050	+
ENSMMUG00000023036	SLC25A3	Uncharacterized protein [Source:UniProtKB/TrEMBL;Acc:F6TUD5]	ENSMMUT00000032414	1008	1197	+
ENSMMUG00000018313	SCAMP3	Secretory carrier-associated membrane protein 3 isoform 1; Uncharacterized protein [Source:UniProtKB/TrEMBL;Acc:F6TUP0]	ENSMMUT00000045813	1391	1510	+
ENSMMUG00000010934	EIF4G1	eukaryotic translation initiation factor 4 gamma, 1 [Source:HGNC Symbol;Acc:HGNC:3296]	ENSMMUT00000015299	1331	1540	+
ENSMMUG00000023141	CLK2	Uncharacterized protein [Source:UniProtKB/TrEMBL;Acc:F7FI62]	ENSMMUT00000032554	1041	1240	+
ENSMMUG00000000800	PSMD2	proteasome (prosome, macropain) 26S subunit, non-ATPase, 2 [Source:HGNC Symbol;Acc:HGNC:9559]	ENSMMUT00000001162	3321	3440	+
ENSMMUG00000023144	FDPS	Uncharacterized protein [Source:UniProtKB/TrEMBL;Acc:F7FI22]	ENSMMUT00000032559	1121	1459	+
ENSMMUG00000023145	RUSC1	RUN and SH3 domain containing 1 [Source:HGNC Symbol;Acc:HGNC:17153]	ENSMMUT00000032561	2241	2430	+
ENSMMUG00000018951	ALG3	Uncharacterized protein [Source:UniProtKB/TrEMBL;Acc:F6YE20]	ENSMMUT00000026647	711	830	+
ENSMMUG00000018080	DAP3	death associated protein 3 [Source:HGNC Symbol;Acc:HGNC:2673]	ENSMMUT00000045790	1251	1497	+
ENSMMUG00000006558	ABCF3	ATP-binding cassette, sub-family F (GCN20), member 3 [Source:HGNC Symbol;Acc:HGNC:72]	ENSMMUT00000009191	2071	2420	+
ENSMMUG00000003668	GAPVD1	GTPase activating protein and VPS9 domains 1 [Source:HGNC Symbol;Acc:HGNC:23375]	ENSMMUT00000005198	431	650	+
ENSMMUG00000023601	UHRF1BP1L	UHRF1 binding protein 1-like [Source:HGNC Symbol;Acc:HGNC:29102]	ENSMMUT00000033205	1981	2210	+
ENSMMUG00000009981	MSTO1	misato 1, mitochondrial distribution and morphology regulator [Source:HGNC Symbol;Acc:HGNC:29678]	ENSMMUT00000045785	1701	2003	+
ENSMMUG00000005217	HSPA5	78 kDa glucose-regulated protein; Uncharacterized protein [Source:UniProtKB/TrEMBL;Acc:F7C3R1]	ENSMMUT00000007348	1541	2000	+
ENSMMUG00000006553	DVL3	Uncharacterized protein [Source:UniProtKB/TrEMBL;Acc:F7HRV7]	ENSMMUT00000009182	2061	2270	+
ENSMMUG00000009987	GON4L	gon-4-like (C. elegans) [Source:HGNC Symbol;Acc:HGNC:25973]	ENSMMUT00000013947	3831	4000	+
ENSMMUG00000023600	SCYL2	Uncharacterized protein [Source:UniProtKB/TrEMBL;Acc:F7HDE5]	ENSMMUT00000033200	2661	2830	+
ENSMMUG00000006562	EIF2B5	Translation initiation factor eIF-2B subunit epsilon; Uncharacterized protein [Source:UniProtKB/TrEMBL;Acc:F7HRU2]	ENSMMUT00000009193	2421	2880	+
ENSMMUG00000007223	DIRAS2	Distinct subgroup of the Ras family member 2; GTP-binding protein Di-Ras2; Uncharacterized protein [Source:UniProtKB/TrEMBL;Acc:F7EK27]	ENSMMUT00000010092	1011	1110	+
ENSMMUG00000001748	SYK	Tyrosine-protein kinase [Source:UniProtKB/TrEMBL;Acc:F7GLV2]	ENSMMUT00000002471	2111	2260	+
ENSMMUG00000023257	NFIL3	E4 promoter-binding protein 4; Nuclear factor interleukin-3-regulated protein; Uncharacterized protein [Source:UniProtKB/TrEMBL;Acc:F7DIW5]	ENSMMUT00000032711	1281	1420	+
ENSMMUG00000005515	ABCC5	Multidrug resistance-associated protein 5 isoform 2; Uncharacterized protein [Source:UniProtKB/TrEMBL;Acc:F6U893]	ENSMMUT00000007759	4141	4300	+
ENSMMUG00000018075	YY1AP1	YY1 associated protein 1 [Source:HGNC Symbol;Acc:HGNC:30935]	ENSMMUT00000045764	2741	2850	+
ENSMMUG00000003006	SPTLC1	serine palmitoyltransferase, long chain base subunit 1 [Source:HGNC Symbol;Acc:HGNC:11277]	ENSMMUT00000004255	1331	1450	+
ENSMMUG00000004628	IARS	isoleucyl-tRNA synthetase [Source:HGNC Symbol;Acc:HGNC:5330]	ENSMMUT00000006546	3321	3470	+
ENSMMUG00000012891	UTP20	Uncharacterized protein [Source:UniProtKB/TrEMBL;Acc:F6S843]	ENSMMUT00000018092	8331	8570	+
ENSMMUG00000021312	SYT11	Uncharacterized protein [Source:UniProtKB/TrEMBL;Acc:F6UYD0]	ENSMMUT00000029997	171	600	+
ENSMMUG00000018874	RIT1	GTP-binding protein Rit1; Uncharacterized protein [Source:UniProtKB/TrEMBL;Acc:F6WZ38]	ENSMMUT00000026531	671	960	+
ENSMMUG00000004648	KIAA0907	KIAA0907 [Source:HGNC Symbol;Acc:HGNC:29145]	ENSMMUT00000006575	2523	2770	+
ENSMMUG00000013661	PARL	Presenilins-associated rhomboid-like protein, mitochondrial isoform 1 preproprotein; Uncharacterized protein [Source:UniProtKB/TrEMBL;Acc:F7FXP9]	ENSMMUT00000027860	1061	1230	+
ENSMMUG00000005092	ARHGEF2	Rho/Rac guanine nucleotide exchange factor (GEF) 2 [Source:HGNC Symbol;Acc:HGNC:682]	ENSMMUT00000007190	3261	3559	+
ENSMMUG00000008070	YEATS2	YEATS domain containing 2 [Source:HGNC Symbol;Acc:HGNC:25489]	ENSMMUT00000011285	4811	4990	+
ENSMMUG00000008067	KLHL24	Uncharacterized protein [Source:UniProtKB/TrEMBL;Acc:F7H156]	ENSMMUT00000011280	1862	2327	+
ENSMMUG00000022115	KLHL6	kelch-like family member 6 [Source:HGNC Symbol;Acc:HGNC:18653]	ENSMMUT00000031111	1913	2143	+
ENSMMUG00000013495	SSR2	Uncharacterized protein [Source:UniProtKB/TrEMBL;Acc:F6ZKS3]	ENSMMUT00000018942	901	1109	+
ENSMMUG00000010553	MCCC1	Uncharacterized protein [Source:UniProtKB/TrEMBL;Acc:F6W233]	ENSMMUT00000014772	2191	2340	+
ENSMMUG00000004642	IPPK	Inositol-pentakisphosphate 2-kinase; Uncharacterized protein [Source:UniProtKB/TrEMBL;Acc:F6TD69]	ENSMMUT00000006565	1568	1790	+
ENSMMUG00000004689	DRAM1	Uncharacterized protein [Source:UniProtKB/TrEMBL;Acc:F6RM51]	ENSMMUT00000006622	1117	1342	+
ENSMMUG00000001061	BICD2	Uncharacterized protein [Source:UniProtKB/TrEMBL;Acc:F6QN47]	ENSMMUT00000001509	1621	1786	+
ENSMMUG00000020795	FGD3	Uncharacterized protein [Source:UniProtKB/TrEMBL;Acc:F6W261]	ENSMMUT00000045738	2911	3125	+
ENSMMUG00000010552	DCUN1D1	DCN1-like protein [Source:UniProtKB/TrEMBL;Acc:F7CZQ4]	ENSMMUT00000014771	731	900	+
ENSMMUG00000019323		Uncharacterized protein [Source:UniProtKB/TrEMBL;Acc:F6S2M3]	ENSMMUT00000045737	4768	5070	+
ENSMMUG00000031599		Uncharacterized protein [Source:UniProtKB/TrEMBL;Acc:F6W298]	ENSMMUT00000045734	51	160	+
ENSMMUG00000014398	NINJ1	Ninjurin-1; Uncharacterized protein [Source:UniProtKB/TrEMBL;Acc:F7BWD3]	ENSMMUT00000020201	671	1100	+
ENSMMUG00000018530		Uncharacterized protein [Source:UniProtKB/TrEMBL;Acc:F7A219]	ENSMMUT00000026053	1	100	+
ENSMMUG00000009493	FAM120A	Uncharacterized protein [Source:UniProtKB/TrEMBL;Acc:F6W8T6]	ENSMMUT00000045721	2971	3390	+
ENSMMUG00000006350	NT5DC3	Uncharacterized protein [Source:UniProtKB/TrEMBL;Acc:F7HC19]	ENSMMUT00000008909	1741	2120	+
ENSMMUG00000019656	TTC14	Uncharacterized protein [Source:UniProtKB/TrEMBL;Acc:F7CU52]	ENSMMUT00000027615	2201	2360	+
ENSMMUG00000023469	HSP90B1	Uncharacterized protein [Source:UniProtKB/TrEMBL;Acc:F6W970]	ENSMMUT00000033019	821	1010	+
ENSMMUG00000008281	PHF2	PHD finger protein 2 [Source:HGNC Symbol;Acc:HGNC:8920]	ENSMMUT00000011583	3951	4160	+
ENSMMUG00000031591	C11H12ORF73	Putative uncharacterized protein C12orf73; Uncharacterized protein [Source:UniProtKB/TrEMBL;Acc:F6W981]	ENSMMUT00000045714	261	370	+
ENSMMUG00000021291	TDG	thymine-DNA glycosylase [Source:HGNC Symbol;Acc:HGNC:11700]	ENSMMUT00000029955	991	1290	+
ENSMMUG00000000090	SMG5	Uncharacterized protein [Source:UniProtKB/TrEMBL;Acc:F6W9D7]	ENSMMUT00000000134	2861	3010	+
ENSMMUG00000022571	HCFC2	Uncharacterized protein [Source:UniProtKB/TrEMBL;Acc:F6W9B8]	ENSMMUT00000031756	2165	2429	+
ENSMMUG00000009746	NDUFB5	Uncharacterized protein [Source:UniProtKB/TrEMBL;Acc:F6W9A8]	ENSMMUT00000013614	407	586	+
ENSMMUG00000009742	ACTL6A	Macaca mulatta actin-like 6A (ACTL6A), mRNA. [Source:RefSeq mRNA;Acc:NM_001104559]	ENSMMUT00000013608	341	450	+
ENSMMUG00000017127	CHST11	Carbohydrate sulfotransferase 11 isoform 1; Uncharacterized protein [Source:UniProtKB/TrEMBL;Acc:F6W9N9]	ENSMMUT00000045705	1331	1460	+
ENSMMUG00000000092	C1orf85	chromosome 1 open reading frame 85 [Source:HGNC Symbol;Acc:HGNC:29436]	ENSMMUT00000000137	1171	1420	+
ENSMMUG00000016343	HIATL1	Uncharacterized protein [Source:UniProtKB/TrEMBL;Acc:F7GRF2]	ENSMMUT00000022950	2271	2410	+
ENSMMUG00000017133	C12orf45	chromosome 12 open reading frame 45 [Source:HGNC Symbol;Acc:HGNC:28628]	ENSMMUT00000024087	461	590	+
ENSMMUG00000009519	KIAA1033	KIAA1033 [Source:HGNC Symbol;Acc:HGNC:29174]	ENSMMUT00000013281	3431	3760	+
ENSMMUG00000004079	MFN1	Mitofusin-1; Uncharacterized protein [Source:UniProtKB/TrEMBL;Acc:F6ZJ06]	ENSMMUT00000005794	1931	2110	+
ENSMMUG00000002634	PTCH1	patched 1 [Source:HGNC Symbol;Acc:HGNC:9585]	ENSMMUT00000003754	3651	4200	+
ENSMMUG00000005188	PIK3CA	Uncharacterized protein [Source:UniProtKB/TrEMBL;Acc:F7CTS2]	ENSMMUT00000007307	3021	3350	+
ENSMMUG00000003711	TCP11L2	Uncharacterized protein [Source:UniProtKB/TrEMBL;Acc:F6S8U5]	ENSMMUT00000005257	1556	1980	+
ENSMMUG00000005208	POLR3B	DNA-directed RNA polymerase [Source:UniProtKB/TrEMBL;Acc:F6WH42]	ENSMMUT00000045683	4261	4631	+
ENSMMUG00000011787	ERCC6L2	excision repair cross-complementation group 6-like 2 [Source:HGNC Symbol;Acc:HGNC:26922]	ENSMMUT00000016520	625	850	+
ENSMMUG00000019597	TBL1XR1	Uncharacterized protein [Source:UniProtKB/TrEMBL;Acc:F7B9D1]	ENSMMUT00000027520	1431	1630	+
ENSMMUG00000007992	SLC35D2	Uncharacterized protein [Source:UniProtKB/TrEMBL;Acc:F6WHP3]	ENSMMUT00000011180	788	1230	+
ENSMMUG00000022279	C11H12ORF23	Putative uncharacterized protein C12orf23; Uncharacterized protein [Source:UniProtKB/TrEMBL;Acc:F6WHZ2]	ENSMMUT00000031337	491	777	+
ENSMMUG00000008295	C9ORF21	Uncharacterized protein [Source:UniProtKB/TrEMBL;Acc:F6WNS0]	ENSMMUT00000011595	351	450	+
ENSMMUG00000002623	APOA1BP	apolipoprotein A-I binding protein [Source:HGNC Symbol;Acc:HGNC:18453]	ENSMMUT00000003734	1151	1390	+
ENSMMUG00000015544	PWP1	Uncharacterized protein [Source:UniProtKB/TrEMBL;Acc:F6RFX4]	ENSMMUT00000021805	181	340	+
ENSMMUG00000031574		Uncharacterized protein [Source:UniProtKB/TrEMBL;Acc:F6WPM1]	ENSMMUT00000045660	371	510	+
ENSMMUG00000015550	PRDM4	PR domain zinc finger protein 4 [Source:UniProtKB/TrEMBL;Acc:F6RFV6]	ENSMMUT00000021807	771	1200	+
ENSMMUG00000017124	SART3	Squamous cell carcinoma antigen recognized by T-cells 3; Uncharacterized protein [Source:UniProtKB/TrEMBL;Acc:F7H2Z6]	ENSMMUT00000024076	2881	3260	+
ENSMMUG00000000512	CORO1C	Coronin [Source:UniProtKB/TrEMBL;Acc:F6YB63]	ENSMMUT00000045652	1241	1690	+
ENSMMUG00000015107	SSH1	slingshot protein phosphatase 1 [Source:HGNC Symbol;Acc:HGNC:30579]	ENSMMUT00000021176	2811	2940	+
ENSMMUG00000000037	ISG20L2	Interferon-stimulated 20 kDa exonuclease-like 2; Uncharacterized protein [Source:UniProtKB/TrEMBL;Acc:F7HRE8]	ENSMMUT00000000053	1241	1440	+
ENSMMUG00000022199	PHC3	polyhomeotic homolog 3 (Drosophila) [Source:HGNC Symbol;Acc:HGNC:15682]	ENSMMUT00000031219	2991	3210	+
ENSMMUG00000000038	RRNAD1	Uncharacterized protein [Source:UniProtKB/TrEMBL;Acc:F6UBA9]	ENSMMUT00000045650	461	600	+
ENSMMUG00000021899	SEC62	Translocation protein SEC62; Uncharacterized protein [Source:UniProtKB/TrEMBL;Acc:F6TBV4]	ENSMMUT00000030813	783	1242	+
ENSMMUG00000000039	MRPL24	39S ribosomal protein L24, mitochondrial; Uncharacterized protein [Source:UniProtKB/TrEMBL;Acc:F7HPI2]	ENSMMUT00000000055	681	876	+
ENSMMUG00000010918	PRCC	Uncharacterized protein [Source:UniProtKB/TrEMBL;Acc:F7GLP8]	ENSMMUT00000015279	1837	1940	+
ENSMMUG00000005237	USP30	Ubiquitin carboxyl-terminal hydrolase [Source:UniProtKB/TrEMBL;Acc:F7BWU9]	ENSMMUT00000007375	1601	1860	+
ENSMMUG00000006956	ALKBH2	Alpha-ketoglutarate-dependent dioxygenase alkB homolog 2 isoform 1; Uncharacterized protein [Source:UniProtKB/TrEMBL;Acc:F7DWK4]	ENSMMUT00000009720	321	450	+
ENSMMUG00000012424	NTRK1	neurotrophic tyrosine kinase, receptor, type 1 [Source:HGNC Symbol;Acc:HGNC:8031]	ENSMMUT00000017421	2251	2410	+
ENSMMUG00000021875	MYNN	Uncharacterized protein [Source:UniProtKB/TrEMBL;Acc:F6PYX1]	ENSMMUT00000045645	1411	1600	+
ENSMMUG00000019649	KCTD10	Uncharacterized protein [Source:UniProtKB/TrEMBL;Acc:F7CV62]	ENSMMUT00000027599	691	940	+
ENSMMUG00000019650	UBE3B	ubiquitin protein ligase E3B [Source:HGNC Symbol;Acc:HGNC:13478]	ENSMMUT00000027600	3291	3440	+
ENSMMUG00000005938	PDCD10	programmed cell death 10 [Source:HGNC Symbol;Acc:HGNC:8761]	ENSMMUT00000021997	721	910	+
ENSMMUG00000011665	MMAB	methylmalonic aciduria (cobalamin deficiency) cblB type [Source:HGNC Symbol;Acc:HGNC:19331]	ENSMMUT00000045638	641	920	+
ENSMMUG00000012436	ARHGEF11	Rho guanine nucleotide exchange factor (GEF) 11 [Source:HGNC Symbol;Acc:HGNC:14580]	ENSMMUT00000017438	5711	5880	+
ENSMMUG00000008974		Uncharacterized protein [Source:UniProtKB/TrEMBL;Acc:F7EQR1]	ENSMMUT00000012540	3411	3530	+
ENSMMUG00000008972	FCRL5	Fc receptor-like 5 [Source:HGNC Symbol;Acc:HGNC:18508]	ENSMMUT00000012536	381	513	+
ENSMMUG00000009564	NMD3	NMD3 ribosome export adaptor [Source:HGNC Symbol;Acc:HGNC:24250]	ENSMMUT00000013344	1829	2074	+
ENSMMUG00000003540	PPM1L	protein phosphatase, Mg2+/Mn2+ dependent, 1L [Source:HGNC Symbol;Acc:HGNC:16381]	ENSMMUT00000005003	331	430	+
ENSMMUG00000018083	KPNA4	karyopherin alpha 4 (importin alpha 3) [Source:HGNC Symbol;Acc:HGNC:6397]	ENSMMUT00000025402	1991	2270	+
ENSMMUG00000019830	FCRL2	Fc receptor-like 2 [Source:HGNC Symbol;Acc:HGNC:14875]	ENSMMUT00000027868	1481	1820	+
ENSMMUG00000007678	ANKRD13A	ankyrin repeat domain 13A [Source:HGNC Symbol;Acc:HGNC:21268]	ENSMMUT00000010755	1901	2030	+
ENSMMUG00000020826	C12orf76	chromosome 12 open reading frame 76 [Source:HGNC Symbol;Acc:HGNC:33790]	ENSMMUT00000029297	401	530	+
ENSMMUG00000001739	ATP2A2	ATPase, Ca++ transporting, cardiac muscle, slow twitch 2 [Source:HGNC Symbol;Acc:HGNC:812]	ENSMMUT00000002456	1	230	+
ENSMMUG00000018675	ANAPC7	Uncharacterized protein [Source:UniProtKB/TrEMBL;Acc:F6ZY88]	ENSMMUT00000026255	2251	2360	+
ENSMMUG00000006494	GPN3	Uncharacterized protein [Source:UniProtKB/TrEMBL;Acc:F7H992]	ENSMMUT00000009103	921	1070	+
ENSMMUG00000023510	MFSD1	major facilitator superfamily domain containing 1 [Source:HGNC Symbol;Acc:HGNC:25874]	ENSMMUT00000033073	1691	2010	+
ENSMMUG00000004961	GFM1	Uncharacterized protein [Source:UniProtKB/TrEMBL;Acc:F6UJH2]	ENSMMUT00000045602	2251	2507	+
ENSMMUG00000013156	PPTC7	PTC7 protein phosphatase homolog (S. cerevisiae) [Source:HGNC Symbol;Acc:HGNC:30695]	ENSMMUT00000018458	3581	3718	+
ENSMMUG00000013664	PPP1CC	Serine/threonine-protein phosphatase [Source:UniProtKB/TrEMBL;Acc:F7GFT6]	ENSMMUT00000019184	1061	1345	+
ENSMMUG00000002223	SH2B3	Uncharacterized protein [Source:UniProtKB/TrEMBL;Acc:F6W719]	ENSMMUT00000003148	1581	1710	+
ENSMMUG00000031548		Peptidyl-prolyl cis-trans isomerase [Source:UniProtKB/TrEMBL;Acc:F6UK89]	ENSMMUT00000045595	341	490	+
ENSMMUG00000017107	BRAP	BRCA1-associated protein; Uncharacterized protein [Source:UniProtKB/TrEMBL;Acc:F7H5B0]	ENSMMUT00000024051	1391	1810	+
ENSMMUG00000015754	ACAD10	acyl-CoA dehydrogenase family, member 10 [Source:HGNC Symbol;Acc:HGNC:21597]	ENSMMUT00000022113	2201	2420	+
ENSMMUG00000016497	CCNL1	cyclin L1 [Source:HGNC Symbol;Acc:HGNC:20569]	ENSMMUT00000014999	1961	2084	+
ENSMMUG00000000366	TIPARP	Uncharacterized protein [Source:UniProtKB/TrEMBL;Acc:F6USD8]	ENSMMUT00000045586	1721	2139	+
ENSMMUG00000016970	SSR3	Translocon-associated protein subunit gamma; Uncharacterized protein [Source:UniProtKB/TrEMBL;Acc:F7B6K2]	ENSMMUT00000023845	291	460	+
ENSMMUG00000007324	GMPS	Glutamine-hydrolyzing GMP synthase; Uncharacterized protein [Source:UniProtKB/TrEMBL;Acc:F7EE95]	ENSMMUT00000010233	2191	2300	+
ENSMMUG00000013917	NAA25	N(alpha)-acetyltransferase 25, NatB auxiliary subunit [Source:HGNC Symbol;Acc:HGNC:25783]	ENSMMUT00000019536	2767	2910	+
ENSMMUG00000005255	TRAFD1	TRAF-type zinc finger domain-containing protein 1; Uncharacterized protein [Source:UniProtKB/TrEMBL;Acc:F7BQF4]	ENSMMUT00000007399	2231	2400	+
ENSMMUG00000007126		Uncharacterized protein [Source:UniProtKB/TrEMBL;Acc:F6V133]	ENSMMUT00000045572	9091	9200	+
ENSMMUG00000011347	DHX36	Uncharacterized protein [Source:UniProtKB/TrEMBL;Acc:F6U0V1]	ENSMMUT00000015892	2885	3265	+
ENSMMUG00000031542	IGSF8	immunoglobulin superfamily, member 8 [Source:HGNC Symbol;Acc:HGNC:17813]	ENSMMUT00000045566	1001	1190	+
ENSMMUG00000015910	MBNL1	Uncharacterized protein [Source:UniProtKB/TrEMBL;Acc:F7ALT3]	ENSMMUT00000022363	5261	5450	+
ENSMMUG00000001665	SUCNR1	succinate receptor 1 [Source:HGNC Symbol;Acc:HGNC:4542]	ENSMMUT00000002359	771	950	+
ENSMMUG00000013253	PTPN11	Tyrosine-protein phosphatase non-receptor type 11; Uncharacterized protein [Source:UniProtKB/TrEMBL;Acc:F6ZJD8]	ENSMMUT00000018606	1771	2070	+
ENSMMUG00000017841		DDB1-and CUL4-associated factor 8; Uncharacterized protein [Source:UniProtKB/TrEMBL;Acc:F7DQC9]	ENSMMUT00000025072	361	756	+
ENSMMUG00000021852	PEX19	Uncharacterized protein [Source:UniProtKB/TrEMBL;Acc:F7EI07]	ENSMMUT00000030747	1511	1710	+
ENSMMUG00000021854	COPA	Uncharacterized protein [Source:UniProtKB/TrEMBL;Acc:F6WKP1]	ENSMMUT00000030749	3181	3390	+
ENSMMUG00000021795	DDX54	DEAD (Asp-Glu-Ala-Asp) box polypeptide 54 [Source:HGNC Symbol;Acc:HGNC:20084]	ENSMMUT00000030669	2691	2990	+
ENSMMUG00000015590	SIAH2	E3 ubiquitin-protein ligase SIAH2; Uncharacterized protein [Source:UniProtKB/TrEMBL;Acc:F6TED2]	ENSMMUT00000021864	826	1303	+
ENSMMUG00000017695	SERP1	Ribosome-associated membrane protein RAMP4-2; Stress-associated endoplasmic reticulum protein 1; Uncharacterized protein [Source:UniProtKB/TrEMBL;Acc:F6U9F6]	ENSMMUT00000024872	1213	1420	+
ENSMMUG00000001129	RITA1	RBPJ interacting and tubulin associated 1 [Source:HGNC Symbol;Acc:HGNC:25925]	ENSMMUT00000001594	401	690	+
ENSMMUG00000021856	NCSTN	Uncharacterized protein [Source:UniProtKB/TrEMBL;Acc:F6WKT8]	ENSMMUT00000030756	2271	2729	+
ENSMMUG00000017696	EIF2A	Uncharacterized protein [Source:UniProtKB/TrEMBL;Acc:F6U3K9]	ENSMMUT00000045550	941	1210	+
ENSMMUG00000004435	TPCN1	two pore segment channel 1 [Source:HGNC Symbol;Acc:HGNC:18182]	ENSMMUT00000006288	2581	2800	+
ENSMMUG00000010496	RBM19	RNA binding motif protein 19 [Source:HGNC Symbol;Acc:HGNC:29098]	ENSMMUT00000014689	831	990	+
ENSMMUG00000023335	RNF13	ring finger protein 13 [Source:HGNC Symbol;Acc:HGNC:10057]	ENSMMUT00000032825	751	1156	+
ENSMMUG00000017215	TM4SF1	transmembrane 4 L six family member 1 [Source:HGNC Symbol;Acc:HGNC:11853]	ENSMMUT00000024196	1415	1624	+
ENSMMUG00000031532		Uncharacterized protein [Source:UniProtKB/TrEMBL;Acc:F6WLA4]	ENSMMUT00000006972	243	377	+
ENSMMUG00000001906	MED13L	Mediator of RNA polymerase II transcription subunit 13-like; Uncharacterized protein [Source:UniProtKB/TrEMBL;Acc:F7FWX5]	ENSMMUT00000002694	6871	7210	+
ENSMMUG00000005528	HPS3	Hermansky-Pudlak syndrome 3 [Source:HGNC Symbol;Acc:HGNC:15597]	ENSMMUT00000007784	2701	2930	+
ENSMMUG00000005526	HLTF	helicase-like transcription factor [Source:HGNC Symbol;Acc:HGNC:11099]	ENSMMUT00000007782	1801	1980	+
ENSMMUG00000005521	GYG1	Uncharacterized protein [Source:UniProtKB/TrEMBL;Acc:F7GFD0]	ENSMMUT00000007776	1017	1204	+
ENSMMUG00000017479	FBXO21	F-box protein 21 [Source:HGNC Symbol;Acc:HGNC:13592]	ENSMMUT00000024578	1751	2210	+
ENSMMUG00000001996	F11R	Uncharacterized protein [Source:UniProtKB/TrEMBL;Acc:F6V265]	ENSMMUT00000002834	1591	1920	+
ENSMMUG00000010235	RFC5	Replication factor C subunit 5 isoform 1; Uncharacterized protein [Source:UniProtKB/TrEMBL;Acc:F6QMV0]	ENSMMUT00000014309	1092	1319	+
ENSMMUG00000002003	USF1	Uncharacterized protein [Source:UniProtKB/TrEMBL;Acc:F6V1J8]	ENSMMUT00000002839	1141	1300	+
ENSMMUG00000017055	C2H3ORF58	Golgi protein GoPro49 isoform a; Uncharacterized protein [Source:UniProtKB/TrEMBL;Acc:F7HNR0]	ENSMMUT00000023972	1731	1886	+
ENSMMUG00000010236	WSB2	WD repeat and SOCS box containing 2 [Source:HGNC Symbol;Acc:HGNC:19222]	ENSMMUT00000014310	1061	1200	+
ENSMMUG00000009694	SLC9A9	Sodium/hydrogen exchanger [Source:UniProtKB/TrEMBL;Acc:F6WTB3]	ENSMMUT00000045526	2981	3150	+
ENSMMUG00000005098	PEBP1	Phosphatidylethanolamine-binding protein; Phosphatidylethanolamine-binding protein 1; Uncharacterized protein [Source:UniProtKB/TrEMBL;Acc:F5CI18]	ENSMMUT00000007191	1291	1390	+
ENSMMUG00000002775	U2SURP	U2 snRNP-associated SURP domain containing [Source:HGNC Symbol;Acc:HGNC:30855]	ENSMMUT00000003941	3141	3260	+
ENSMMUG00000002010	DEDD	Death effector domain-containing protein; Uncharacterized protein [Source:UniProtKB/TrEMBL;Acc:F6UTR2]	ENSMMUT00000002848	991	1230	+
ENSMMUG00000019860	PRKAB1	5'-AMP-activated protein kinase subunit beta-1; Uncharacterized protein [Source:UniProtKB/TrEMBL;Acc:F7GTI4]	ENSMMUT00000027911	1401	1610	+
ENSMMUG00000022631	USP21	ubiquitin specific peptidase 21 [Source:HGNC Symbol;Acc:HGNC:12620]	ENSMMUT00000045520	381	680	+
ENSMMUG00000014038	XRN1	5'-3' exoribonuclease 1 isoform b; Uncharacterized protein [Source:UniProtKB/TrEMBL;Acc:F6WU61]	ENSMMUT00000045513	1311	1410	+
ENSMMUG00000011210	RAB35	RAB35, member RAS oncogene family [Source:HGNC Symbol;Acc:HGNC:9774]	ENSMMUT00000045518	581	1138	+
ENSMMUG00000009152	GCN1L1	GCN1 general control of amino-acid synthesis 1-like 1 (yeast) [Source:HGNC Symbol;Acc:HGNC:4199]	ENSMMUT00000012805	8021	8470	+
ENSMMUG00000022629	B4GALT3	Uncharacterized protein [Source:UniProtKB/TrEMBL;Acc:F6WU79]	ENSMMUT00000031844	1201	1705	+
ENSMMUG00000009157	RPLP0	ribosomal protein, large, P0 [Source:HGNC Symbol;Acc:HGNC:10371]	ENSMMUT00000045510	461	700	+
ENSMMUG00000004520	NDUFS2	Uncharacterized protein [Source:UniProtKB/TrEMBL;Acc:F6SCT3]	ENSMMUT00000025476	478	770	+
ENSMMUG00000012256	ATP1B3	Uncharacterized protein [Source:UniProtKB/TrEMBL;Acc:F6V064]	ENSMMUT00000045508	1354	1486	+
ENSMMUG00000009418	RASA2	Uncharacterized protein [Source:UniProtKB/TrEMBL;Acc:F6X9K0]	ENSMMUT00000013151	2321	2606	+
ENSMMUG00000031526	ZBTB38	Uncharacterized protein; Zinc finger and BTB domain-containing protein 38 [Source:UniProtKB/TrEMBL;Acc:F6TJ26]	ENSMMUT00000045502	2811	2910	+
ENSMMUG00000016494	SRSF9	Uncharacterized protein [Source:UniProtKB/TrEMBL;Acc:F7G4A1]	ENSMMUT00000023167	1	341	+
ENSMMUG00000004223	RNF10	RING finger protein 10; Uncharacterized protein [Source:UniProtKB/TrEMBL;Acc:F6TJ77]	ENSMMUT00000045497	2231	2420	+
ENSMMUG00000022153	SLC25A36	solute carrier family 25 (pyrimidine nucleotide carrier ), member 36 [Source:HGNC Symbol;Acc:HGNC:25554]	ENSMMUT00000031161	671	786	+
ENSMMUG00000018126	TOMM40L	Mitochondrial import receptor subunit TOM40B; Uncharacterized protein [Source:UniProtKB/TrEMBL;Acc:F7FCD5]	ENSMMUT00000045499	2271	2590	+
ENSMMUG00000000287	NMNAT3	Uncharacterized protein [Source:UniProtKB/TrEMBL;Acc:F6X0R2]	ENSMMUT00000000421	1111	1289	+
ENSMMUG00000020602	POP5	Ribonuclease P/MRP protein subunit POP5 isoform a; Uncharacterized protein [Source:UniProtKB/TrEMBL;Acc:F7BZ76]	ENSMMUT00000028986	581	700	+
ENSMMUG00000003051	COPB2	coatomer protein complex, subunit beta 2 (beta prime) [Source:HGNC Symbol;Acc:HGNC:2232]	ENSMMUT00000004320	981	1080	+
ENSMMUG00000003048	MRPS22	28S ribosomal protein S22, mitochondrial; Uncharacterized protein [Source:UniProtKB/TrEMBL;Acc:F6VEV8]	ENSMMUT00000004317	941	1068	+
ENSMMUG00000020648	ACADS	Uncharacterized protein [Source:UniProtKB/TrEMBL;Acc:F6TRA8]	ENSMMUT00000029046	1207	1518	+
ENSMMUG00000012411	SDHC	Succinate dehydrogenase cytochrome b560 subunit, mitochondrial isoform 2; Uncharacterized protein [Source:UniProtKB/TrEMBL;Acc:F6TR99]	ENSMMUT00000017397	931	1125	+
ENSMMUG00000020650	SPPL3	Uncharacterized protein [Source:UniProtKB/TrEMBL;Acc:F6TRI6]	ENSMMUT00000029047	1911	2100	+
ENSMMUG00000003775	FCGR2B	Uncharacterized protein [Source:UniProtKB/TrEMBL;Acc:F7GVR0]	ENSMMUT00000005345	1201	1320	+
ENSMMUG00000021284	DBR1	Lariat debranching enzyme; Uncharacterized protein [Source:UniProtKB/TrEMBL;Acc:F6V8K9]	ENSMMUT00000029946	1461	1612	+
ENSMMUG00000016969	CAMKK2	calcium/calmodulin-dependent protein kinase kinase 2, beta [Source:HGNC Symbol;Acc:HGNC:1470]	ENSMMUT00000045468	2291	2650	+
ENSMMUG00000004047	DUSP12	dual specificity phosphatase 12 [Source:HGNC Symbol;Acc:HGNC:3067]	ENSMMUT00000005743	931	1081	+
ENSMMUG00000004049	ATF6	Uncharacterized protein [Source:UniProtKB/TrEMBL;Acc:F6ZR51]	ENSMMUT00000005748	1781	2060	+
ENSMMUG00000019360	TMEM22	Transmembrane protein 22; Uncharacterized protein [Source:UniProtKB/TrEMBL;Acc:F6TAG1]	ENSMMUT00000027190	1371	1640	+
ENSMMUG00000003263	STAG1	stromal antigen 1 [Source:HGNC Symbol;Acc:HGNC:11354]	ENSMMUT00000004616	3061	3220	+
ENSMMUG00000019513	UHMK1	Uncharacterized protein [Source:UniProtKB/TrEMBL;Acc:F7CXV5]	ENSMMUT00000027409	2565	2782	+
ENSMMUG00000003262	PCCB	Propionyl-CoA carboxylase beta chain, mitochondrial isoform 1; Uncharacterized protein [Source:UniProtKB/TrEMBL;Acc:F7DJ09]	ENSMMUT00000004614	1581	1790	+
ENSMMUG00000019514	UAP1	UDP-N-acetylhexosamine pyrophosphorylase; Uncharacterized protein [Source:UniProtKB/TrEMBL;Acc:F7CXU2]	ENSMMUT00000027411	211	520	+
ENSMMUG00000019090		Uncharacterized protein [Source:UniProtKB/TrEMBL;Acc:F6QD77]	ENSMMUT00000045464	2181	2355	+
ENSMMUG00000021563	RNF34	Uncharacterized protein [Source:UniProtKB/TrEMBL;Acc:F7F6I1]	ENSMMUT00000030345	381	530	+
ENSMMUG00000021564	KDM2B	Uncharacterized protein [Source:UniProtKB/TrEMBL;Acc:F7EGM6]	ENSMMUT00000045460	4181	4420	+
ENSMMUG00000000933	MSL2	Male-specific lethal 2 homolog isoform 1; Uncharacterized protein [Source:UniProtKB/TrEMBL;Acc:F6R6H5]	ENSMMUT00000001331	3401	3520	+
ENSMMUG00000031508		Uncharacterized protein [Source:UniProtKB/TrEMBL;Acc:F7EHY7]	ENSMMUT00000030751	412	549	+
ENSMMUG00000001306	ORAI1	Uncharacterized protein [Source:UniProtKB/TrEMBL;Acc:F7BNH0]	ENSMMUT00000001846	730	1177	+
ENSMMUG00000005306	TRIM11	Uncharacterized protein [Source:UniProtKB/TrEMBL;Acc:F7GJW9]	ENSMMUT00000007472	121	310	+
ENSMMUG00000012842		Uncharacterized protein [Source:UniProtKB/TrEMBL;Acc:F6TBI5]	ENSMMUT00000018016	721	880	+
ENSMMUG00000012650	BCL7A	Uncharacterized protein [Source:UniProtKB/TrEMBL;Acc:F7E7W3]	ENSMMUT00000017742	1481	1590	+
ENSMMUG00000012652	MLXIP	MLX interacting protein [Source:HGNC Symbol;Acc:HGNC:17055]	ENSMMUT00000017744	3171	3580	+
ENSMMUG00000012750	ANAPC13	Anaphase-promoting complex subunit 13; Uncharacterized protein [Source:UniProtKB/TrEMBL;Acc:F7ENP2]	ENSMMUT00000017885	612	910	+
ENSMMUG00000012654	B3GNT4	UDP-GlcNAc:betaGal beta-1,3-N-acetylglucosaminyltransferase 4 [Source:HGNC Symbol;Acc:HGNC:15683]	ENSMMUT00000017746	1121	1220	+
ENSMMUG00000018037	VPS33A	Diablo homolog, mitochondrial isoform 1; Uncharacterized protein [Source:UniProtKB/TrEMBL;Acc:F7E7K2]	ENSMMUT00000029577	2041	2170	+
ENSMMUG00000023087	C1ORF69	Uncharacterized protein [Source:UniProtKB/TrEMBL;Acc:F6URQ3]	ENSMMUT00000032482	841	1040	+
ENSMMUG00000008918	SRPRB	Signal recognition particle receptor subunit beta; Uncharacterized protein [Source:UniProtKB/TrEMBL;Acc:F7DHR2]	ENSMMUT00000012467	638	1023	+
ENSMMUG00000000059	TOPBP1	DNA topoisomerase 2-binding protein 1; Uncharacterized protein [Source:UniProtKB/TrEMBL;Acc:F7HM93]	ENSMMUT00000000085	3821	3950	+
ENSMMUG00000021928	CLIP1	CAP-GLY domain containing linker protein 1 [Source:HGNC Symbol;Acc:HGNC:10461]	ENSMMUT00000030851	2681	2810	+
ENSMMUG00000002790	MRPL55	mitochondrial ribosomal protein L55 [Source:HGNC Symbol;Acc:HGNC:16686]	ENSMMUT00000045434	1091	1250	+
ENSMMUG00000000058			ENSMMUT00000000082	1771	1970	+
ENSMMUG00000002791	C1H1ORF35	Uncharacterized protein [Source:UniProtKB/TrEMBL;Acc:F7GI10]	ENSMMUT00000003960	1241	1340	+
ENSMMUG00000002792			ENSMMUT00000003961	491	770	+
ENSMMUG00000007556	KNTC1	kinetochore associated 1 [Source:HGNC Symbol;Acc:HGNC:17255]	ENSMMUT00000010566	5791	5950	+
ENSMMUG00000001869	SNAP47	Uncharacterized protein [Source:UniProtKB/TrEMBL;Acc:F7GK63]	ENSMMUT00000002631	2021	2170	+
ENSMMUG00000001867	JMJD4	Uncharacterized protein [Source:UniProtKB/TrEMBL;Acc:F7GP81]	ENSMMUT00000002630	2031	2460	+
ENSMMUG00000021771	UBA5	ubiquitin-like modifier activating enzyme 5 [Source:HGNC Symbol;Acc:HGNC:23230]	ENSMMUT00000030632	1	150	+
ENSMMUG00000015222	VPS37B	vacuolar protein sorting 37 homolog B (S. cerevisiae) [Source:HGNC Symbol;Acc:HGNC:25754]	ENSMMUT00000021341	561	670	+
ENSMMUG00000019678	MPHOSPH9	Uncharacterized protein [Source:UniProtKB/TrEMBL;Acc:F7CH33]	ENSMMUT00000027641	241	410	+
ENSMMUG00000008636	ADCK3	Chaperone activity of bc1 complex-like, mitochondrial; Uncharacterized protein [Source:UniProtKB/TrEMBL;Acc:F7F8M4]	ENSMMUT00000012079	2031	2160	+
ENSMMUG00000001154	NUDT16	U8 snoRNA-decapping enzyme isoform 2; Uncharacterized protein [Source:UniProtKB/TrEMBL;Acc:F6RQ47]	ENSMMUT00000001625	521	746	+
ENSMMUG00000000434	CDK2AP1	Uncharacterized protein [Source:UniProtKB/TrEMBL;Acc:F7A6I0]	ENSMMUT00000000632	201	327	+
ENSMMUG00000011496	SBNO1	strawberry notch homolog 1 (Drosophila) [Source:HGNC Symbol;Acc:HGNC:22973]	ENSMMUT00000016098	2051	2320	+
ENSMMUG00000018525	PSEN2	Uncharacterized protein [Source:UniProtKB/TrEMBL;Acc:F7A2D1]	ENSMMUT00000045407	1826	2010	+
ENSMMUG00000005137	ATP2C1	Uncharacterized protein [Source:UniProtKB/TrEMBL;Acc:F6YCV0]	ENSMMUT00000007242	2341	2450	+
ENSMMUG00000023048		Cytochrome b-c1 complex subunit Rieske, mitochondrial [Source:UniProtKB/TrEMBL;Acc:F6V7Y3]	ENSMMUT00000032429	369	610	+
ENSMMUG00000031491	TMED2	transmembrane emp24 domain trafficking protein 2 [Source:HGNC Symbol;Acc:HGNC:16996]	ENSMMUT00000045404	351	534	+
ENSMMUG00000013178	DDX55	DEAD (Asp-Glu-Ala-Asp) box polypeptide 55 [Source:HGNC Symbol;Acc:HGNC:20085]	ENSMMUT00000018486	1491	1890	+
ENSMMUG00000020294	PIK3R4	phosphoinositide-3-kinase, regulatory subunit 4 [Source:HGNC Symbol;Acc:HGNC:8982]	ENSMMUT00000028545	1101	1240	+
ENSMMUG00000021820	PARP1	poly (ADP-ribose) polymerase 1 [Source:HGNC Symbol;Acc:HGNC:270]	ENSMMUT00000030705	731	940	+
ENSMMUG00000013181	EIF2B1	eukaryotic translation initiation factor 2B, subunit 1 alpha, 26kDa [Source:HGNC Symbol;Acc:HGNC:3257]	ENSMMUT00000018489	1371	1590	+
ENSMMUG00000020377		Uncharacterized protein [Source:UniProtKB/TrEMBL;Acc:F6UGC1]	ENSMMUT00000028657	111	270	+
ENSMMUG00000006546	ATP6V0A2	Uncharacterized protein [Source:UniProtKB/TrEMBL;Acc:F7HS27]	ENSMMUT00000009171	1881	2012	+
ENSMMUG00000002560	SPOPL	Speckle-type POZ protein-like; Uncharacterized protein [Source:UniProtKB/TrEMBL;Acc:F7HSR0]	ENSMMUT00000003641	1111	1310	+
ENSMMUG00000004933	METTL6	Uncharacterized protein [Source:UniProtKB/TrEMBL;Acc:F7CDC5]	ENSMMUT00000006960	201	440	+
ENSMMUG00000009213	ZNF664	Uncharacterized protein [Source:UniProtKB/TrEMBL;Acc:F7HJR3]	ENSMMUT00000012881	421	590	+
ENSMMUG00000019058	ACBD3	Uncharacterized protein [Source:UniProtKB/TrEMBL;Acc:F6QTK2]	ENSMMUT00000026776	1061	1600	+
ENSMMUG00000023107	NCOR2	nuclear receptor corepressor 2 [Source:HGNC Symbol;Acc:HGNC:7673]	ENSMMUT00000045391	8091	8259	+
ENSMMUG00000021330	KYNU	Kynureninase [Source:UniProtKB/TrEMBL;Acc:F6URB1]	ENSMMUT00000030020	1031	1270	+
ENSMMUG00000031483	H3F3B	H3 histone, family 3B (H3.3B) [Source:HGNC Symbol;Acc:HGNC:4765]	ENSMMUT00000045394	1	150	+
ENSMMUG00000006528	ARHGAP15	Rho GTPase-activating protein 15; Uncharacterized protein [Source:UniProtKB/TrEMBL;Acc:F7H6M3]	ENSMMUT00000009146	161	370	+
ENSMMUG00000017148	SDE2	SDE2 telomere maintenance homolog (S. pombe) [Source:HGNC Symbol;Acc:HGNC:26643]	ENSMMUT00000045392	1201	1360	+
ENSMMUG00000016486	SCARB1	scavenger receptor class B, member 1 [Source:HGNC Symbol;Acc:HGNC:1664]	ENSMMUT00000045387	246	410	+
ENSMMUG00000011434	PYCR2	Uncharacterized protein [Source:UniProtKB/TrEMBL;Acc:F7BA50]	ENSMMUT00000045383	1358	1577	+
ENSMMUG00000017902	DHX37	Uncharacterized protein [Source:UniProtKB/TrEMBL;Acc:F7F112]	ENSMMUT00000025156	3521	3854	+
ENSMMUG00000005213	BRI3BP	Uncharacterized protein [Source:UniProtKB/TrEMBL;Acc:F7CM63]	ENSMMUT00000007339	584	810	+
ENSMMUG00000022519		Uncharacterized protein [Source:UniProtKB/TrEMBL;Acc:F6YNW6]	ENSMMUT00000031678	595	720	+
ENSMMUG00000011117	AACS	acetoacetyl-CoA synthetase [Source:HGNC Symbol;Acc:HGNC:21298]	ENSMMUT00000015538	2401	2680	+
ENSMMUG00000010691		Uncharacterized protein [Source:UniProtKB/TrEMBL;Acc:F7G5W7]	ENSMMUT00000014948	571	684	+
ENSMMUG00000006926			ENSMMUT00000009677	721	919	+
ENSMMUG00000021288	ANKRD28	ankyrin repeat domain 28 [Source:HGNC Symbol;Acc:HGNC:29024]	ENSMMUT00000012772	3021	3240	+
ENSMMUG00000000134	SRP9	Signal recognition particle 9 kDa protein [Source:UniProtKB/TrEMBL;Acc:F7G5Y8]	ENSMMUT00000045368	241	528	+
ENSMMUG00000005767	SLC15A4	solute carrier family 15 (oligopeptide transporter), member 4 [Source:HGNC Symbol;Acc:HGNC:23090]	ENSMMUT00000008097	1261	1810	+
ENSMMUG00000003472	LBR	Lamin-B receptor; Uncharacterized protein [Source:UniProtKB/TrEMBL;Acc:F7EBC6]	ENSMMUT00000004915	3501	3657	+
ENSMMUG00000022693	OXNAD1	Oxidoreductase NAD-binding domain-containing protein 1; Uncharacterized protein [Source:UniProtKB/TrEMBL;Acc:F7GSN7]	ENSMMUT00000031934	1151	1330	+
ENSMMUG00000022694	RFTN1	Uncharacterized protein [Source:UniProtKB/TrEMBL;Acc:F7GSN3]	ENSMMUT00000031935	1351	1580	+
ENSMMUG00000023776	TBC1D5	TBC1 domain family, member 5 [Source:HGNC Symbol;Acc:HGNC:19166]	ENSMMUT00000033462	2269	2570	+
ENSMMUG00000012227	WDR26	Uncharacterized protein [Source:UniProtKB/TrEMBL;Acc:F7G637]	ENSMMUT00000045356	5931	6070	+
ENSMMUG00000019009	SATB1	DNA-binding protein SATB1 isoform 1; Uncharacterized protein [Source:UniProtKB/TrEMBL;Acc:F6XW50]	ENSMMUT00000045357	2691	2860	+
ENSMMUG00000020927	RAN	GTP-binding nuclear protein Ran; Uncharacterized protein [Source:UniProtKB/TrEMBL;Acc:F7H2M4]	ENSMMUT00000029433	841	940	+
ENSMMUG00000005633	MMADHC	Methylmalonic aciduria and homocystinuria type D protein, mitochondrial; Uncharacterized protein [Source:UniProtKB/TrEMBL;Acc:F6WCH6]	ENSMMUT00000045355	414	540	+
ENSMMUG00000002041	GPR133	G protein-coupled receptor 133 [Source:HGNC Symbol;Acc:HGNC:19893]	ENSMMUT00000045352	3637	3937	+
ENSMMUG00000009936	CNIH4	Uncharacterized protein [Source:UniProtKB/TrEMBL;Acc:F6Y4B7]	ENSMMUT00000013871	501	616	+
ENSMMUG00000006992	RAB5A	Ras-related protein Rab-5A; Uncharacterized protein [Source:UniProtKB/TrEMBL;Acc:F7DQ40]	ENSMMUT00000009768	701	1101	+
ENSMMUG00000022510	NVL	nuclear VCP-like [Source:HGNC Symbol;Acc:HGNC:8070]	ENSMMUT00000031669	1531	1700	+
ENSMMUG00000020343	SFSWAP	Splicing factor, suppressor of white-apricot homolog; Uncharacterized protein [Source:UniProtKB/TrEMBL;Acc:F6W9M1]	ENSMMUT00000028613	111	220	+
ENSMMUG00000010331	MMP17	matrix metallopeptidase 17 (membrane-inserted) [Source:HGNC Symbol;Acc:HGNC:7163]	ENSMMUT00000014451	1331	1650	+
ENSMMUG00000015773	ULK1	unc-51 like autophagy activating kinase 1 [Source:HGNC Symbol;Acc:HGNC:12558]	ENSMMUT00000022141	1441	1650	+
ENSMMUG00000031463	PUS1	tRNA pseudouridine synthase [Source:UniProtKB/TrEMBL;Acc:F7G6D4]	ENSMMUT00000045343	881	990	+
ENSMMUG00000002400	DEGS1	Sphingolipid delta(4)-desaturase DES1; Uncharacterized protein [Source:UniProtKB/TrEMBL;Acc:F6PPX9]	ENSMMUT00000003410	1141	1310	+
ENSMMUG00000000676	FBXO28	Uncharacterized protein [Source:UniProtKB/TrEMBL;Acc:F6Z0J2]	ENSMMUT00000000972	761	1320	+
ENSMMUG00000017729	EP400	Uncharacterized protein [Source:UniProtKB/TrEMBL;Acc:F7F7Y2]	ENSMMUT00000024923	7511	7650	+
ENSMMUG00000011146	TP53BP2	tumor protein p53 binding protein, 2 [Source:HGNC Symbol;Acc:HGNC:12000]	ENSMMUT00000015577	4031	4230	+
ENSMMUG00000006353	RPL15	ribosomal protein L15 [Source:HGNC Symbol;Acc:HGNC:10306]	ENSMMUT00000008913	641	769	+
ENSMMUG00000006739	DDX51	DEAD (Asp-Glu-Ala-Asp) box polypeptide 51 [Source:HGNC Symbol;Acc:HGNC:20082]	ENSMMUT00000005660	2081	2300	+
ENSMMUG00000007371	TOP2B	Uncharacterized protein [Source:UniProtKB/TrEMBL;Acc:F7E563]	ENSMMUT00000010309	4471	4750	+
ENSMMUG00000015026	BROX	BRO1 domain-containing protein BROX; Uncharacterized protein [Source:UniProtKB/TrEMBL;Acc:F6V547]	ENSMMUT00000021067	1461	1690	+
ENSMMUG00000014790	NGLY1	N-glycanase 1 [Source:HGNC Symbol;Acc:HGNC:17646]	ENSMMUT00000020754	411	570	+
ENSMMUG00000015025	AIDA	Uncharacterized protein [Source:UniProtKB/TrEMBL;Acc:F6V576]	ENSMMUT00000021063	11	220	+
ENSMMUG00000010521	ARL5A	ADP-ribosylation factor-like 5A [Source:HGNC Symbol;Acc:HGNC:696]	ENSMMUT00000014723	751	918	+
ENSMMUG00000015463			ENSMMUT00000021685	1369	1564	+
ENSMMUG00000015467	ANKLE2	ankyrin repeat and LEM domain containing 2 [Source:HGNC Symbol;Acc:HGNC:29101]	ENSMMUT00000021691	671	1030	+
ENSMMUG00000031451	GOLGA3	Uncharacterized protein [Source:UniProtKB/TrEMBL;Acc:F7GA16]	ENSMMUT00000045319	4361	4596	+
ENSMMUG00000019327	SLC4A7	Uncharacterized protein [Source:UniProtKB/TrEMBL;Acc:F6RVT7]	ENSMMUT00000027141	3381	3640	+
ENSMMUG00000020182	HLX	Uncharacterized protein [Source:UniProtKB/TrEMBL;Acc:F6UPM6]	ENSMMUT00000028397	1031	1280	+
ENSMMUG00000015468	CHFR	checkpoint with forkhead and ring finger domains, E3 ubiquitin protein ligase [Source:HGNC Symbol;Acc:HGNC:20455]	ENSMMUT00000045312	2291	2456	+
ENSMMUG00000031450		Uncharacterized protein [Source:UniProtKB/TrEMBL;Acc:F7GD62]	ENSMMUT00000045313	170	310	+
ENSMMUG00000011607	NR4A2	Nuclear receptor subfamily 4 group A member 2; Uncharacterized protein [Source:UniProtKB/TrEMBL;Acc:F6PLH4]	ENSMMUT00000016263	1871	2430	+
ENSMMUG00000007784	RAB3GAP2	RAB3 GTPase activating protein subunit 2 (non-catalytic) [Source:HGNC Symbol;Acc:HGNC:17168]	ENSMMUT00000045297	4801	5030	+
ENSMMUG00000004897	GPD2	Glycerol-3-phosphate dehydrogenase, mitochondrial; Uncharacterized protein [Source:UniProtKB/TrEMBL;Acc:F7CJI8]	ENSMMUT00000006917	2097	2364	+
ENSMMUG00000008608	STT3B	STT3B, subunit of the oligosaccharyltransferase complex (catalytic) [Source:HGNC Symbol;Acc:HGNC:30611]	ENSMMUT00000012035	2221	2500	+
ENSMMUG00000014176	CYTIP	Uncharacterized protein [Source:UniProtKB/TrEMBL;Acc:F7AT53]	ENSMMUT00000019894	681	830	+
ENSMMUG00000007783	IARS2	isoleucyl-tRNA synthetase 2, mitochondrial [Source:HGNC Symbol;Acc:HGNC:29685]	ENSMMUT00000010899	2661	2998	+
ENSMMUG00000009931	CMTM7	Uncharacterized protein [Source:UniProtKB/TrEMBL;Acc:F6Y4G7]	ENSMMUT00000013865	1141	1300	+
ENSMMUG00000018497	ACVR1	Activin receptor type-1; Uncharacterized protein [Source:UniProtKB/TrEMBL;Acc:F7A9J8]	ENSMMUT00000026013	2141	2260	+
ENSMMUG00000001443	CMTM6	CKLF-like MARVEL transmembrane domain-containing protein 6; Uncharacterized protein [Source:UniProtKB/TrEMBL;Acc:F7BRV9]	ENSMMUT00000002044	566	840	+
ENSMMUG00000008722	EPRS	glutamyl-prolyl-tRNA synthetase [Source:HGNC Symbol;Acc:HGNC:3418]	ENSMMUT00000012189	2921	3090	+
ENSMMUG00000005465	DYNC1LI1	dynein, cytoplasmic 1, light intermediate chain 1 [Source:HGNC Symbol;Acc:HGNC:18745]	ENSMMUT00000007694	511	620	+
ENSMMUG00000006596	CNOT10	CCR4-NOT transcription complex subunit 10; Uncharacterized protein [Source:UniProtKB/TrEMBL;Acc:F7GGC1]	ENSMMUT00000045291	2491	2600	+
ENSMMUG00000011638	PKP4	plakophilin 4 [Source:HGNC Symbol;Acc:HGNC:9026]	ENSMMUT00000016310	3441	3560	+
ENSMMUG00000031442		Uncharacterized protein [Source:UniProtKB/TrEMBL;Acc:F7GGC8]	ENSMMUT00000045289	246	450	+
ENSMMUG00000016917	UBP1	Uncharacterized protein; Upstream-binding protein 1 isoform b [Source:UniProtKB/TrEMBL;Acc:F7CJ26]	ENSMMUT00000045283	2412	2854	+
ENSMMUG00000018877	RGS19	Regulator of G-protein signaling 19; Uncharacterized protein [Source:UniProtKB/TrEMBL;Acc:F6WYU6]	ENSMMUT00000026536	531	650	+
ENSMMUG00000031438	CLASP2	Uncharacterized protein [Source:UniProtKB/TrEMBL;Acc:F6VGJ2]	ENSMMUT00000002795	441	560	+
ENSMMUG00000018878	TCEA2	Uncharacterized protein [Source:UniProtKB/TrEMBL;Acc:F6WYS1]	ENSMMUT00000026540	801	1000	+
ENSMMUG00000022639	KCTD3	Uncharacterized protein [Source:UniProtKB/TrEMBL;Acc:F7FRD8]	ENSMMUT00000031856	2164	2753	+
ENSMMUG00000015558	PRPF6	pre-mRNA processing factor 6 [Source:HGNC Symbol;Acc:HGNC:15860]	ENSMMUT00000021821	312	490	+
ENSMMUG00000015556	ZNF512B	zinc finger protein 512B [Source:HGNC Symbol;Acc:HGNC:29212]	ENSMMUT00000021816	2431	2600	+
ENSMMUG00000020719	2015-03-07	membrane-associated ring finger (C3HC4) 7, E3 ubiquitin protein ligase [Source:HGNC Symbol;Acc:HGNC:17393]	ENSMMUT00000029145	1651	1870	+
ENSMMUG00000015634	CENPF	Uncharacterized protein [Source:UniProtKB/TrEMBL;Acc:F6RLX8]	ENSMMUT00000021938	9201	9380	+
ENSMMUG00000003702		Uncharacterized protein [Source:UniProtKB/TrEMBL;Acc:F6SFF8]	ENSMMUT00000027941	1446	1616	+
ENSMMUG00000015631	SMYD2	SET and MYND domain containing 2 [Source:HGNC Symbol;Acc:HGNC:20982]	ENSMMUT00000021928	1211	1350	+
ENSMMUG00000000171	ZGPAT	zinc finger, CCCH-type with G patch domain [Source:HGNC Symbol;Acc:HGNC:15948]	ENSMMUT00000000256	3201	3350	+
ENSMMUG00000000175			ENSMMUT00000000264	351	450	+
ENSMMUG00000000167	RTEL1	regulator of telomere elongation helicase 1 [Source:HGNC Symbol;Acc:HGNC:15888]	ENSMMUT00000000246	3481	3720	+
ENSMMUG00000011735	ANGEL2	angel homolog 2 (Drosophila) [Source:HGNC Symbol;Acc:HGNC:30534]	ENSMMUT00000016433	1461	1597	+
ENSMMUG00000014905	ST6GAL1	Beta-galactoside alpha-2,6-sialyltransferase 1 isoform a; Uncharacterized protein [Source:UniProtKB/TrEMBL;Acc:F6TW24]	ENSMMUT00000020911	461	560	+
ENSMMUG00000011906	PSMD14	26S proteasome non-ATPase regulatory subunit 14; Uncharacterized protein [Source:UniProtKB/TrEMBL;Acc:F7HMX1]	ENSMMUT00000016683	1451	1580	+
ENSMMUG00000019287	NSL1	NSL1, MIS12 kinetochore complex component [Source:HGNC Symbol;Acc:HGNC:24548]	ENSMMUT00000027089	791	901	+
ENSMMUG00000009198	BCL6	B-cell lymphoma 6 protein isoform 1; Uncharacterized protein [Source:UniProtKB/TrEMBL;Acc:F7HM62]	ENSMMUT00000012862	1581	1890	+
ENSMMUG00000006168	GMEB2	glucocorticoid modulatory element binding protein 2 [Source:HGNC Symbol;Acc:HGNC:4371]	ENSMMUT00000008626	1451	1600	+
ENSMMUG00000015056	BATF3	Uncharacterized protein [Source:UniProtKB/TrEMBL;Acc:F6TKQ3]	ENSMMUT00000021102	451	630	+
ENSMMUG00000006070	PRIC285	Uncharacterized protein [Source:UniProtKB/TrEMBL;Acc:F6W2L0]	ENSMMUT00000008486	4755	4890	+
ENSMMUG00000012185	ATF3	Uncharacterized protein [Source:UniProtKB/TrEMBL;Acc:F7FN44]	ENSMMUT00000045259	551	1160	+
ENSMMUG00000006064	PPDPF	Pancreatic progenitor cell differentiation and proliferation factor; Uncharacterized protein [Source:UniProtKB/TrEMBL;Acc:F6W3F1]	ENSMMUT00000008475	551	760	+
ENSMMUG00000002141	TMEM206	transmembrane protein 206 [Source:HGNC Symbol;Acc:HGNC:25593]	ENSMMUT00000003024	861	1010	+
ENSMMUG00000019771	PPP2R5A	Serine/threonine-protein phosphatase 2A 56 kDa regulatory subunit alpha isoform isoform 1; Uncharacterized protein [Source:UniProtKB/TrEMBL;Acc:F7APV7]	ENSMMUT00000027790	1931	2040	+
ENSMMUG00000010176	DTL	Denticleless protein homolog; Uncharacterized protein [Source:UniProtKB/TrEMBL;Acc:F6SRD8]	ENSMMUT00000014207	1831	2190	+
ENSMMUG00000010174	INTS7	integrator complex subunit 7 [Source:HGNC Symbol;Acc:HGNC:24484]	ENSMMUT00000045249	2611	3092	+
ENSMMUG00000005216	NEK2	Serine/threonine-protein kinase Nek2 isoform 1; Uncharacterized protein [Source:UniProtKB/TrEMBL;Acc:F7C8J4]	ENSMMUT00000007344	1481	1600	+
ENSMMUG00000019590	GCA	Grancalcin; Uncharacterized protein [Source:UniProtKB/TrEMBL;Acc:F7B9J4]	ENSMMUT00000027512	391	520	+
ENSMMUG00000000868	SLC30A1	Uncharacterized protein [Source:UniProtKB/TrEMBL;Acc:F6TFE8]	ENSMMUT00000001239	1211	1370	+
ENSMMUG00000031427	TRAF5	TNF receptor-associated factor 5 [Source:HGNC Symbol;Acc:HGNC:12035]	ENSMMUT00000045246	1431	1820	+
ENSMMUG00000015330	CCDC50	Coiled-coil domain-containing protein 50 short isoform; Uncharacterized protein [Source:UniProtKB/TrEMBL;Acc:F6SPZ0]	ENSMMUT00000021498	1721	1920	+
ENSMMUG00000015911	ARFGAP1	ADP-ribosylation factor GTPase-activating protein 1 isoform a; Uncharacterized protein [Source:UniProtKB/TrEMBL;Acc:F7AMI0]	ENSMMUT00000022360	1411	1690	+
ENSMMUG00000009231	NKAIN4	Uncharacterized protein [Source:UniProtKB/TrEMBL;Acc:F7FNM7]	ENSMMUT00000012905	1031	1270	+
ENSMMUG00000017867		Uncharacterized protein [Source:UniProtKB/TrEMBL;Acc:F7DPM8]	ENSMMUT00000025109	281	390	+
ENSMMUG00000009227	YTHDF1	Uncharacterized protein; YTH domain family protein 1 [Source:UniProtKB/TrEMBL;Acc:F7FNP8]	ENSMMUT00000045241	1741	1920	+
ENSMMUG00000018840	SCN3A	Uncharacterized protein [Source:UniProtKB/TrEMBL;Acc:F6ZAM3]	ENSMMUT00000026491	6231	6530	+
ENSMMUG00000022066	DIEXF	Uncharacterized protein [Source:UniProtKB/TrEMBL;Acc:F7FP23]	ENSMMUT00000031048	2281	2450	+
ENSMMUG00000005712	GID8	Protein C20orf11; Two hybrid-associated protein 1 with RanBPM; Uncharacterized protein [Source:UniProtKB/TrEMBL;Acc:F6U494]	ENSMMUT00000008016	551	840	+
ENSMMUG00000019310	DIDO1	Uncharacterized protein [Source:UniProtKB/TrEMBL;Acc:F6S3P4]	ENSMMUT00000027116	6501	6790	+
ENSMMUG00000009765	OPA1	Uncharacterized protein [Source:UniProtKB/TrEMBL;Acc:F6Y1N8]	ENSMMUT00000013660	3181	3350	+
ENSMMUG00000022065	IRF6	Interferon regulatory factor 6 isoform 1; Uncharacterized protein [Source:UniProtKB/TrEMBL;Acc:F7FP28]	ENSMMUT00000031042	1511	1610	+
ENSMMUG00000008229	TCFL5	transcription factor-like 5 (basic helix-loop-helix) [Source:HGNC Symbol;Acc:HGNC:11646]	ENSMMUT00000045232	721	830	+
ENSMMUG00000016848	SLCO4A1	solute carrier organic anion transporter family, member 4A1 [Source:HGNC Symbol;Acc:HGNC:10953]	ENSMMUT00000023672	2191	2504	+
ENSMMUG00000012032	ATP13A3	ATPase type 13A3 [Source:HGNC Symbol;Acc:HGNC:24113]	ENSMMUT00000016854	3446	3724	+
ENSMMUG00000019177	GALNT3	Uncharacterized protein [Source:UniProtKB/TrEMBL;Acc:F6R679]	ENSMMUT00000026944	1	450	+
ENSMMUG00000005006	RPS21	ribosomal protein S21 [Source:HGNC Symbol;Acc:HGNC:10409]	ENSMMUT00000007061	301	410	+
ENSMMUG00000012626	ADRM1	Uncharacterized protein [Source:UniProtKB/TrEMBL;Acc:F7F0I5]	ENSMMUT00000045214	1241	1406	+
ENSMMUG00000002021	BDH1	3-hydroxybutyrate dehydrogenase, type 1 [Source:HGNC Symbol;Acc:HGNC:1027]	ENSMMUT00000002862	731	1030	+
ENSMMUG00000016585	DLG1	Uncharacterized protein [Source:UniProtKB/TrEMBL;Acc:F6VPE3]	ENSMMUT00000023290	2221	2460	+
ENSMMUG00000012623	OSBPL2	oxysterol binding protein-like 2 [Source:HGNC Symbol;Acc:HGNC:15761]	ENSMMUT00000017707	1911	2104	+
ENSMMUG00000006215	STK39	serine threonine kinase 39 [Source:HGNC Symbol;Acc:HGNC:17717]	ENSMMUT00000008694	1831	1960	+
ENSMMUG00000007825	NCBP2	Nuclear cap-binding protein subunit 2 isoform 1; Uncharacterized protein [Source:UniProtKB/TrEMBL;Acc:F7CIQ8]	ENSMMUT00000010957	461	580	+
ENSMMUG00000002259	SENP5	SUMO1/sentrin specific peptidase 5 [Source:HGNC Symbol;Acc:HGNC:28407]	ENSMMUT00000003195	1521	1690	+
ENSMMUG00000014338	LASS6	Uncharacterized protein [Source:UniProtKB/TrEMBL;Acc:F7CYG3]	ENSMMUT00000045202	1301	1430	+
ENSMMUG00000012607	MTG2	mitochondrial ribosome-associated GTPase 2 [Source:HGNC Symbol;Acc:HGNC:16239]	ENSMMUT00000017676	921	1130	+
ENSMMUG00000003774	PIGX	phosphatidylinositol glycan anchor biosynthesis, class X [Source:HGNC Symbol;Acc:HGNC:26046]	ENSMMUT00000005341	539	680	+
ENSMMUG00000003773	CEP19	Centrosomal protein of 19 kDa; Uncharacterized protein [Source:UniProtKB/TrEMBL;Acc:F7FWC1]	ENSMMUT00000020765	581	730	+
ENSMMUG00000021637	LRRC33	Uncharacterized protein [Source:UniProtKB/TrEMBL;Acc:F7DZ44]	ENSMMUT00000030450	1921	2080	+
ENSMMUG00000018354	PSMA7	Uncharacterized protein [Source:UniProtKB/TrEMBL;Acc:F7H3W3]	ENSMMUT00000025794	471	645	+
ENSMMUG00000014084	LSM14B	Uncharacterized protein [Source:UniProtKB/TrEMBL;Acc:F7CDJ6]	ENSMMUT00000019776	751	950	+
ENSMMUG00000019100	UBXN7	UBX domain protein 7 [Source:HGNC Symbol;Acc:HGNC:29119]	ENSMMUT00000026843	961	1460	+
ENSMMUG00000008696	TAF4	TAF4 RNA polymerase II, TATA box binding protein (TBP)-associated factor, 135kDa [Source:HGNC Symbol;Acc:HGNC:11537]	ENSMMUT00000012154	1861	2010	+
ENSMMUG00000002114	TFRC	Transferrin receptor 1; Transferrin receptor protein 1; Uncharacterized protein [Source:UniProtKB/TrEMBL;Acc:F6UX47]	ENSMMUT00000002982	2141	2440	+
ENSMMUG00000023567	MAPKAPK2	mitogen-activated protein kinase-activated protein kinase 2 [Source:HGNC Symbol;Acc:HGNC:6887]	ENSMMUT00000033149	1301	1639	+
ENSMMUG00000000972	TNK2	Uncharacterized protein [Source:UniProtKB/TrEMBL;Acc:F6SXS0]	ENSMMUT00000045187	1831	2300	+
ENSMMUG00000019520			ENSMMUT00000027421	981	1130	+
ENSMMUG00000002528	EIF2D	Uncharacterized protein [Source:UniProtKB/TrEMBL;Acc:F7GM46]	ENSMMUT00000003596	761	930	+
ENSMMUG00000007560		Uncharacterized protein [Source:UniProtKB/TrEMBL;Acc:F6T0Y7]	ENSMMUT00000010569	451	610	+
ENSMMUG00000013185	ATP5E	Macaca mulatta H+ transporting F1 ATP synthase epsilon subunit (ATP5E), mRNA. [Source:RefSeq mRNA;Acc:NM_001032901]	ENSMMUT00000018497	311	410	+
ENSMMUG00000015390	NELFCD	negative elongation factor complex member C/D [Source:HGNC Symbol;Acc:HGNC:15934]	ENSMMUT00000021578	1811	2163	+
ENSMMUG00000010266	GNAS1	Uncharacterized protein [Source:UniProtKB/TrEMBL;Acc:F6PUT7]	ENSMMUT00000014360	2921	3020	+
ENSMMUG00000002526	IKBKE	Uncharacterized protein [Source:UniProtKB/TrEMBL;Acc:F7GM52]	ENSMMUT00000003591	1041	1420	+
ENSMMUG00000023062	UBR3	Uncharacterized protein [Source:UniProtKB/TrEMBL;Acc:F7GM61]	ENSMMUT00000032452	1281	1400	+
ENSMMUG00000004318			ENSMMUT00000045165	62	693	+
ENSMMUG00000001833	STX16	Uncharacterized protein [Source:UniProtKB/TrEMBL;Acc:F7GQX4]	ENSMMUT00000002581	1201	1320	+
ENSMMUG00000019944	PPP4R1	Putative serine/threonine-protein phosphatase 4 regulatory subunit 1-like protein; Uncharacterized protein [Source:UniProtKB/TrEMBL;Acc:F7FZT4]	ENSMMUT00000028028	221	440	+
ENSMMUG00000022589	PMEPA1	Solid tumor-associated 1 protein; Uncharacterized protein [Source:UniProtKB/TrEMBL;Acc:F6ZDP3]	ENSMMUT00000031785	741	1010	+
ENSMMUG00000021426	SLC41A1	Solute carrier family 41 member 1; Uncharacterized protein [Source:UniProtKB/TrEMBL;Acc:F7EEX1]	ENSMMUT00000030159	4431	4620	+
ENSMMUG00000021227	RAB7L1	Ras-related protein Rab-7L1 isoform 1; Uncharacterized protein [Source:UniProtKB/TrEMBL;Acc:F7HTT7]	ENSMMUT00000029866	871	1130	+
ENSMMUG00000031391	RBM38	RNA-binding protein 38 isoform a; Uncharacterized protein [Source:UniProtKB/TrEMBL;Acc:F7GMA4]	ENSMMUT00000045156	851	1209	+
ENSMMUG00000000252	RAE1	Uncharacterized protein; mRNA export factor; mRNA-associated protein mrnp 41 [Source:UniProtKB/TrEMBL;Acc:F6X9Q4]	ENSMMUT00000000372	1471	1670	+
ENSMMUG00000007301	DYNC1I2	Uncharacterized protein [Source:UniProtKB/TrEMBL;Acc:F7F396]	ENSMMUT00000010208	2001	2189	+
ENSMMUG00000010480	TMCC2	Uncharacterized protein [Source:UniProtKB/TrEMBL;Acc:F7BGY3]	ENSMMUT00000014664	1551	1810	+
ENSMMUG00000007310	SLC25A12	Calcium-binding mitochondrial carrier protein Aralar1; Uncharacterized protein [Source:UniProtKB/TrEMBL;Acc:F7F2U3]	ENSMMUT00000010218	1921	2199	+
ENSMMUG00000007313	HAT1	histone acetyltransferase 1 [Source:HGNC Symbol;Acc:HGNC:4821]	ENSMMUT00000010219	951	1350	+
ENSMMUG00000000070	AURKA	Uncharacterized protein [Source:UniProtKB/TrEMBL;Acc:F7GNU0]	ENSMMUT00000045131	1231	1690	+
ENSMMUG00000007314	METAP1D	Methionine aminopeptidase [Source:UniProtKB/TrEMBL;Acc:F7F2S1]	ENSMMUT00000010220	751	959	+
ENSMMUG00000018358	ZNF217	Uncharacterized protein [Source:UniProtKB/TrEMBL;Acc:F7GNV2]	ENSMMUT00000025798	2881	3130	+
ENSMMUG00000013035	TSHZ2	teashirt zinc finger homeobox 2 [Source:HGNC Symbol;Acc:HGNC:13010]	ENSMMUT00000018285	2861	3060	+
ENSMMUG00000018846	ZFP64	Uncharacterized protein [Source:UniProtKB/TrEMBL;Acc:F6XST5]	ENSMMUT00000026498	1811	2040	+
ENSMMUG00000014672	ZAK	Mitogen-activated protein kinase kinase kinase MLT isoform 2; Uncharacterized protein [Source:UniProtKB/TrEMBL;Acc:F7FLS9]	ENSMMUT00000045114	2061	2220	+
ENSMMUG00000016563		Uncharacterized protein [Source:UniProtKB/TrEMBL;Acc:F7GQ93]	ENSMMUT00000023260	241	870	+
ENSMMUG00000014228	CDCA7	Cell division cycle-associated protein 7 isoform 2; Uncharacterized protein [Source:UniProtKB/TrEMBL;Acc:F7D7H5]	ENSMMUT00000019966	1661	1780	+
ENSMMUG00000031377		Uncharacterized protein [Source:UniProtKB/TrEMBL;Acc:F7GQ97]	ENSMMUT00000045112	239	340	+
ENSMMUG00000016561	PPP1R15B	protein phosphatase 1, regulatory subunit 15B [Source:HGNC Symbol;Acc:HGNC:14951]	ENSMMUT00000023258	2371	2610	+
ENSMMUG00000001851			ENSMMUT00000002605	224	330	+
ENSMMUG00000021818	SP3	Sp3 transcription factor [Source:HGNC Symbol;Acc:HGNC:11208]	ENSMMUT00000030702	2011	2205	+
ENSMMUG00000007092	OLA1	Obg-like ATPase 1 isoform 1; Uncharacterized protein [Source:UniProtKB/TrEMBL;Acc:F7ERJ8]	ENSMMUT00000045105	651	787	+
ENSMMUG00000002761	ADNP	Activity-dependent neuroprotective protein; Activity-dependent neuroprotector homeobox protein; Uncharacterized protein [Source:UniProtKB/TrEMBL;Acc:F7H2B6]	ENSMMUT00000003924	3621	3990	+
ENSMMUG00000007878	PTPN1	Tyrosine-protein phosphatase non-receptor type [Source:UniProtKB/TrEMBL;Acc:F7B6C1]	ENSMMUT00000011037	11	110	+
ENSMMUG00000008460	SOX13	SRY (sex determining region Y)-box 13 [Source:HGNC Symbol;Acc:HGNC:11192]	ENSMMUT00000011831	1721	1860	+
ENSMMUG00000012228	TMEM189	Uncharacterized protein [Source:UniProtKB/TrEMBL;Acc:F6VEX3]	ENSMMUT00000017124	2281	2390	+
ENSMMUG00000010539	ZC3H11A	Uncharacterized protein [Source:UniProtKB/TrEMBL;Acc:F7D104]	ENSMMUT00000014745	5481	5684	+
ENSMMUG00000000757	RNF114	RING finger protein 114; Uncharacterized protein [Source:UniProtKB/TrEMBL;Acc:F6RK58]	ENSMMUT00000001088	1751	1920	+
ENSMMUG00000007801	LAX1	lymphocyte transmembrane adaptor 1 [Source:HGNC Symbol;Acc:HGNC:26005]	ENSMMUT00000010928	981	1520	+
ENSMMUG00000002715	SLC9A8	solute carrier family 9, subfamily A (NHE8, cation proton antiporter 8), member 8 [Source:HGNC Symbol;Acc:HGNC:20728]	ENSMMUT00000003864	1771	1940	+
ENSMMUG00000002124	B4GALT5	Beta-1,4-galactosyltransferase 5; Uncharacterized protein [Source:UniProtKB/TrEMBL;Acc:F6UWL7]	ENSMMUT00000002993	991	1510	+
ENSMMUG00000023623	ZNFX1	zinc finger, NFX1-type containing 1 [Source:HGNC Symbol;Acc:HGNC:29271]	ENSMMUT00000033229	1701	1850	+
ENSMMUG00000023621	DDX27	Putative ATP-dependent RNA helicase DDX27; Uncharacterized protein [Source:UniProtKB/TrEMBL;Acc:F7HB37]	ENSMMUT00000033228	1821	2300	+
ENSMMUG00000003954	ATP5G3	ATP synthase lipid-binding protein, mitochondrial isoform A; Uncharacterized protein [Source:UniProtKB/TrEMBL;Acc:F6ZG64]	ENSMMUT00000005606	1	204	+
ENSMMUG00000023498	KIAA1715	Protein lunapark; Uncharacterized protein [Source:UniProtKB/TrEMBL;Acc:F7E2N7]	ENSMMUT00000033059	1041	1319	+
ENSMMUG00000002302	STAU1	Uncharacterized protein [Source:UniProtKB/TrEMBL;Acc:F7AER2]	ENSMMUT00000003261	2241	2460	+
ENSMMUG00000019636	CSE1L	Exportin-2; Exportin-2 isoform 1; Uncharacterized protein [Source:UniProtKB/TrEMBL;Acc:F7AUV0]	ENSMMUT00000027581	1871	2010	+
ENSMMUG00000008502	AGPS	alkylglycerone phosphate synthase [Source:HGNC Symbol;Acc:HGNC:327]	ENSMMUT00000011881	871	1060	+
ENSMMUG00000019635	ARFGEF2	ADP-ribosylation factor guanine nucleotide-exchange factor 2 (brefeldin A-inhibited) [Source:HGNC Symbol;Acc:HGNC:15853]	ENSMMUT00000027578	5481	5700	+
ENSMMUG00000000801	TMEM183A	Uncharacterized protein [Source:UniProtKB/TrEMBL;Acc:F6R1V8]	ENSMMUT00000001163	333	540	+
ENSMMUG00000002185	PRKRA	protein kinase, interferon-inducible double stranded RNA dependent activator [Source:HGNC Symbol;Acc:HGNC:9438]	ENSMMUT00000003086	621	730	+
ENSMMUG00000007046	ADIPOR1	Adiponectin receptor protein 1; Uncharacterized protein [Source:UniProtKB/TrEMBL;Acc:F7F197]	ENSMMUT00000033260	1411	1850	+
ENSMMUG00000017849	KLHL12	Kelch-like protein 12; Uncharacterized protein [Source:UniProtKB/TrEMBL;Acc:F7DK52]	ENSMMUT00000025086	2337	2730	+
ENSMMUG00000012020	NCOA3	nuclear receptor coactivator 3 [Source:HGNC Symbol;Acc:HGNC:7670]	ENSMMUT00000016843	4341	4860	+
ENSMMUG00000015233	KDM5B	lysine (K)-specific demethylase 5B [Source:HGNC Symbol;Acc:HGNC:18039]	ENSMMUT00000021356	4231	4470	+
ENSMMUG00000015710	ZMYND8	Uncharacterized protein [Source:UniProtKB/TrEMBL;Acc:F6SF51]	ENSMMUT00000022057	3781	4055	+
ENSMMUG00000001926	RNPEP	Uncharacterized protein [Source:UniProtKB/TrEMBL;Acc:F6TYZ5]	ENSMMUT00000002725	1431	1670	+
ENSMMUG00000001924	TIMM17A	Mitochondrial import inner membrane translocase subunit Tim17-A; Uncharacterized protein [Source:UniProtKB/TrEMBL;Acc:F6TZ17]	ENSMMUT00000002722	561	740	+
ENSMMUG00000001916	IPO9	importin 9 [Source:HGNC Symbol;Acc:HGNC:19425]	ENSMMUT00000002714	3191	3449	+
ENSMMUG00000008069	UBE2E3	Ubiquitin-conjugating enzyme E2 E3; Uncharacterized protein [Source:UniProtKB/TrEMBL;Acc:F7H158]	ENSMMUT00000011283	571	830	+
ENSMMUG00000000300	ITGA4	integrin, alpha 4 (antigen CD49D, alpha 4 subunit of VLA-4 receptor) [Source:HGNC Symbol;Acc:HGNC:6140]	ENSMMUT00000000438	2431	2610	+
ENSMMUG00000014277	SSFA2	Sperm-specific antigen 2 isoform 2; Uncharacterized protein [Source:UniProtKB/TrEMBL;Acc:F7BY73]	ENSMMUT00000020034	2561	2750	+
ENSMMUG00000014394	DNAJC10	DnaJ homolog subfamily C member 10; Uncharacterized protein [Source:UniProtKB/TrEMBL;Acc:F7BX23]	ENSMMUT00000020198	279	440	+
ENSMMUG00000015064	ELMO2	Engulfment and cell motility protein 2; Uncharacterized protein [Source:UniProtKB/TrEMBL;Acc:F6WWC5]	ENSMMUT00000021115	2901	3140	+
ENSMMUG00000018071	SLC35C2	Uncharacterized protein [Source:UniProtKB/TrEMBL;Acc:F7EKU7]	ENSMMUT00000025382	141	370	+
ENSMMUG00000005921	KIF21B	kinesin family member 21B [Source:HGNC Symbol;Acc:HGNC:29442]	ENSMMUT00000008286	2851	3030	+
ENSMMUG00000003683	CD40	CD40 molecule, TNF receptor superfamily member 5 [Source:HGNC Symbol;Acc:HGNC:11919]	ENSMMUT00000005213	1241	1450	+
ENSMMUG00000012218	CAMSAP1L1	Uncharacterized protein [Source:UniProtKB/TrEMBL;Acc:F6VME1]	ENSMMUT00000017110	4221	4510	+
ENSMMUG00000016555	NCOA5	Nuclear receptor coactivator 5; Uncharacterized protein [Source:UniProtKB/TrEMBL;Acc:F7FXV9]	ENSMMUT00000045016	701	860	+
ENSMMUG00000004268	DDX59	DEAD (Asp-Glu-Ala-Asp) box polypeptide 59 [Source:HGNC Symbol;Acc:HGNC:25360]	ENSMMUT00000006068	811	1050	+
ENSMMUG00000013702	ZNF335	zinc finger protein 335 [Source:HGNC Symbol;Acc:HGNC:15807]	ENSMMUT00000019246	4221	4438	+
ENSMMUG00000007334	ZNF281	Uncharacterized protein [Source:UniProtKB/TrEMBL;Acc:F7EE00]	ENSMMUT00000010244	2681	2820	+
ENSMMUG00000008265	GULP1	Uncharacterized protein [Source:UniProtKB/TrEMBL;Acc:F7FYB9]	ENSMMUT00000045005	1141	1250	+
ENSMMUG00000013697	PCIF1	PDX1 C-terminal inhibiting factor 1 [Source:HGNC Symbol;Acc:HGNC:16200]	ENSMMUT00000019234	1997	2365	+
ENSMMUG00000009960	CTSA	Uncharacterized protein [Source:UniProtKB/TrEMBL;Acc:F6RBN1]	ENSMMUT00000045002	2891	3030	+
ENSMMUG00000000009	PTPRC	Uncharacterized protein [Source:UniProtKB/TrEMBL;Acc:F7HTR2]	ENSMMUT00000000016	3621	3890	+
ENSMMUG00000012510	ACOT8	Uncharacterized protein [Source:UniProtKB/TrEMBL;Acc:F7EDA8]	ENSMMUT00000045001	1001	1100	+
ENSMMUG00000021022	DNTTIP1	Deoxynucleotidyltransferase terminal-interacting protein 1; Uncharacterized protein [Source:UniProtKB/TrEMBL;Acc:F7G203]	ENSMMUT00000044992	1101	1245	+
ENSMMUG00000019335	RPL3	ribosomal protein L3 [Source:HGNC Symbol;Acc:HGNC:10332]	ENSMMUT00000027159	347	467	+
ENSMMUG00000011080	WDR75	WD repeat domain 75 [Source:HGNC Symbol;Acc:HGNC:25725]	ENSMMUT00000015492	2247	2603	+
ENSMMUG00000014310	ASNSD1	asparagine synthetase domain containing 1 [Source:HGNC Symbol;Acc:HGNC:24910]	ENSMMUT00000020080	2131	2335	+
ENSMMUG00000014315	OSGEPL1	O-sialoglycoprotein endopeptidase-like 1 [Source:HGNC Symbol;Acc:HGNC:23075]	ENSMMUT00000020084	311	480	+
ENSMMUG00000014316	ORMDL1	ORM1-like protein 1; Uncharacterized protein [Source:UniProtKB/TrEMBL;Acc:F7D5L1]	ENSMMUT00000020085	821	980	+
ENSMMUG00000003406	SDC4	Syndecan [Source:UniProtKB/TrEMBL;Acc:F7FE95]	ENSMMUT00000004816	578	786	+
ENSMMUG00000007283	HIBCH	3-hydroxyisobutyryl-CoA hydrolase [Source:HGNC Symbol;Acc:HGNC:4908]	ENSMMUT00000010173	281	460	+
ENSMMUG00000007289	MFSD6	Major facilitator superfamily domain-containing protein 6; Uncharacterized protein [Source:UniProtKB/TrEMBL;Acc:F7FBJ5]	ENSMMUT00000010182	2281	2540	+
ENSMMUG00000001145	TMEM194B	Uncharacterized protein [Source:UniProtKB/TrEMBL;Acc:F6RQD0]	ENSMMUT00000001615	801	1030	+
ENSMMUG00000022664	NAB1	NGFI-A-binding protein 1; Uncharacterized protein [Source:UniProtKB/TrEMBL;Acc:F7AIE9]	ENSMMUT00000031891	1518	1688	+
ENSMMUG00000005612	GLS	Uncharacterized protein [Source:UniProtKB/TrEMBL;Acc:F6WK20]	ENSMMUT00000044972	2334	2533	+
ENSMMUG00000005613	STAT1	Signal transducer and activator of transcription 1-alpha/beta isoform alpha; Uncharacterized protein [Source:UniProtKB/TrEMBL;Acc:F6WE02]	ENSMMUT00000007897	2581	2840	+
ENSMMUG00000013206	YWHAB	14-3-3 protein beta/alpha; Uncharacterized protein [Source:UniProtKB/TrEMBL;Acc:F6XFG9]	ENSMMUT00000018526	2531	2660	+
ENSMMUG00000005617	STAT4	Uncharacterized protein [Source:UniProtKB/TrEMBL;Acc:F6WDY6]	ENSMMUT00000007899	781	940	+
ENSMMUG00000013969	SERINC3	Serine incorporator 3; Tumor differentially expressed protein 1; Uncharacterized protein [Source:UniProtKB/TrEMBL;Acc:F6S622]	ENSMMUT00000019608	1381	1680	+
ENSMMUG00000005621	SLC39A10	Uncharacterized protein; Zinc transporter ZIP10 [Source:UniProtKB/TrEMBL;Acc:F6WDC7]	ENSMMUT00000044946	2811	3020	+
ENSMMUG00000003486	RGS1	Uncharacterized protein [Source:UniProtKB/TrEMBL;Acc:F7E7H3]	ENSMMUT00000004937	681	1039	+
ENSMMUG00000000396	IFT52	Intraflagellar transport protein 52 homolog; Protein NGD5-like protein; Uncharacterized protein [Source:UniProtKB/TrEMBL;Acc:F6X5E4]	ENSMMUT00000000578	1211	1420	+
ENSMMUG00000022623		Uncharacterized protein [Source:UniProtKB/TrEMBL;Acc:F6Z6B5]	ENSMMUT00000031835	151	250	+
ENSMMUG00000005626	STK17B	serine/threonine kinase 17b [Source:HGNC Symbol;Acc:HGNC:11396]	ENSMMUT00000007913	851	1178	+
ENSMMUG00000021423	PLA2G4A	Uncharacterized protein [Source:UniProtKB/TrEMBL;Acc:F7EEZ1]	ENSMMUT00000030156	1271	1390	+
ENSMMUG00000016857	PTGS2	Uncharacterized protein [Source:UniProtKB/TrEMBL;Acc:F7BWZ9]	ENSMMUT00000023682	1811	1969	+
ENSMMUG00000005627	HECW2	Uncharacterized protein [Source:UniProtKB/TrEMBL;Acc:F6WD73]	ENSMMUT00000007914	591	850	+
ENSMMUG00000008643	GTF3C3	General transcription factor 3C polypeptide 3 isoform 1; Uncharacterized protein [Source:UniProtKB/TrEMBL;Acc:F7F8I5]	ENSMMUT00000012085	80	520	+
ENSMMUG00000011124			ENSMMUT00000015549	335	448	+
ENSMMUG00000022425	ANKRD44	Uncharacterized protein [Source:UniProtKB/TrEMBL;Acc:F6XBK4]	ENSMMUT00000031547	1461	1600	+
ENSMMUG00000020458	CHD6	chromodomain helicase DNA binding protein 6 [Source:HGNC Symbol;Acc:HGNC:19057]	ENSMMUT00000028784	7901	8064	+
ENSMMUG00000022430	SF3B1	Splicing factor 3B subunit 1 isoform 1; Uncharacterized protein [Source:UniProtKB/TrEMBL;Acc:F6X4D3]	ENSMMUT00000031550	3021	3140	+
ENSMMUG00000010489	HSPD1	Uncharacterized protein [Source:UniProtKB/TrEMBL;Acc:F7BGB7]	ENSMMUT00000014673	1731	1850	+
ENSMMUG00000016547	MOBKL3	Uncharacterized protein [Source:UniProtKB/TrEMBL;Acc:F6W5E9]	ENSMMUT00000023239	1341	1514	+
ENSMMUG00000005905	PLCG1	1-phosphatidylinositol-4,5-bisphosphate phosphodiesterase gamma-1 isoform a; Uncharacterized protein [Source:UniProtKB/TrEMBL;Acc:F6WWF3]	ENSMMUT00000008266	4031	4190	+
ENSMMUG00000023810	MARS2	methionyl-tRNA synthetase 2, mitochondrial [Source:HGNC Symbol;Acc:HGNC:25133]	ENSMMUT00000033506	1005	1899	+
ENSMMUG00000011112	TOP1	Uncharacterized protein [Source:UniProtKB/TrEMBL;Acc:F6TZC2]	ENSMMUT00000015533	821	1000	+
ENSMMUG00000013879	TRMT1L	Uncharacterized protein [Source:UniProtKB/TrEMBL;Acc:F6RCA6]	ENSMMUT00000019482	2171	2460	+
ENSMMUG00000023167	TYW5	tRNA-yW synthesizing protein 5 [Source:HGNC Symbol;Acc:HGNC:26754]	ENSMMUT00000032587	1071	1190	+
ENSMMUG00000023168	C2orf47	chromosome 2 open reading frame 47 [Source:HGNC Symbol;Acc:HGNC:26198]	ENSMMUT00000032588	1111	1266	+
ENSMMUG00000008101	SPATS2L	SPATS2-like protein isoform a; Uncharacterized protein [Source:UniProtKB/TrEMBL;Acc:F7HIW4]	ENSMMUT00000011324	1281	1520	+
ENSMMUG00000008102	KCTD18	Uncharacterized protein [Source:UniProtKB/TrEMBL;Acc:F7HIV8]	ENSMMUT00000011326	1298	1510	+
ENSMMUG00000003378	ACTR5	Uncharacterized protein [Source:UniProtKB/TrEMBL;Acc:F7FIM2]	ENSMMUT00000004776	1871	2183	+
ENSMMUG00000019515	FAM129A	family with sequence similarity 129, member A [Source:HGNC Symbol;Acc:HGNC:16784]	ENSMMUT00000027414	1841	2180	+
ENSMMUG00000017350	RALGAPB	Uncharacterized protein [Source:UniProtKB/TrEMBL;Acc:F7B4G0]	ENSMMUT00000044899	5134	5320	+
ENSMMUG00000005410	EDEM3	Uncharacterized protein [Source:UniProtKB/TrEMBL;Acc:F7GT33]	ENSMMUT00000007610	2301	2692	+
ENSMMUG00000022202	BZW1	basic leucine zipper and W2 domains 1 [Source:HGNC Symbol;Acc:HGNC:18380]	ENSMMUT00000031227	2611	2710	+
ENSMMUG00000006640	CLK1	Uncharacterized protein [Source:UniProtKB/TrEMBL;Acc:F7B4G9]	ENSMMUT00000044898	81	500	+
ENSMMUG00000006639	NIF3L1	NIF3-like protein 1 isoform 1; Uncharacterized protein [Source:UniProtKB/TrEMBL;Acc:F7B590]	ENSMMUT00000044895	1322	1540	+
ENSMMUG00000016399	RGL1	Uncharacterized protein [Source:UniProtKB/TrEMBL;Acc:F7FYX4]	ENSMMUT00000023027	3391	3580	+
ENSMMUG00000014460	ORC2	origin recognition complex, subunit 2 [Source:HGNC Symbol;Acc:HGNC:8488]	ENSMMUT00000020284	2111	2260	+
ENSMMUG00000018924	RPRD1B	Cell cycle-related and expression-elevated protein in tumor; Regulation of nuclear pre-mRNA domain-containing protein 1B; Uncharacterized protein [Source:UniProtKB/TrEMBL;Acc:F6ZTV4]	ENSMMUT00000026603	1021	1499	+
ENSMMUG00000018923	TTI1	TELO2 interacting protein 1 [Source:HGNC Symbol;Acc:HGNC:29029]	ENSMMUT00000026601	901	1010	+
ENSMMUG00000018458	SMG7	Uncharacterized protein [Source:UniProtKB/TrEMBL;Acc:F7C550]	ENSMMUT00000025950	4461	4770	+
ENSMMUG00000017224	CTNNBL1	Uncharacterized protein [Source:UniProtKB/TrEMBL;Acc:F7BBR8]	ENSMMUT00000024215	1741	1880	+
ENSMMUG00000015940	BLCAP	Bladder cancer-associated protein; Uncharacterized protein [Source:UniProtKB/TrEMBL;Acc:F7AJE1]	ENSMMUT00000022417	1618	2015	+
ENSMMUG00000010363	RPN2	ribophorin II [Source:HGNC Symbol;Acc:HGNC:10382]	ENSMMUT00000044862	2021	2230	+
ENSMMUG00000011506	RIC8A	RIC8 guanine nucleotide exchange factor A [Source:HGNC Symbol;Acc:HGNC:29550]	ENSMMUT00000016112	2251	2360	+
ENSMMUG00000023812	TRAK2	Trafficking kinesin-binding protein 2; Uncharacterized protein [Source:UniProtKB/TrEMBL;Acc:F7HR24]	ENSMMUT00000033510	3191	3370	+
ENSMMUG00000004625	ATHL1	Uncharacterized protein [Source:UniProtKB/TrEMBL;Acc:F6PZB6]	ENSMMUT00000006541	1	260	+
ENSMMUG00000018141	STRADB	Uncharacterized protein [Source:UniProtKB/TrEMBL;Acc:F6UPQ9]	ENSMMUT00000025494	1451	1676	+
ENSMMUG00000015084	LAMC1	Uncharacterized protein [Source:UniProtKB/TrEMBL;Acc:F6WVB2]	ENSMMUT00000021141	4611	4830	+
ENSMMUG00000013257	IFITM1	interferon induced transmembrane protein 1 [Source:HGNC Symbol;Acc:HGNC:5412]	ENSMMUT00000018611	1	140	+
ENSMMUG00000021723	B4GALNT4	beta-1,4-N-acetyl-galactosaminyl transferase 4 [Source:HGNC Symbol;Acc:HGNC:26315]	ENSMMUT00000030568	1531	1780	+
ENSMMUG00000005635	DHX9	ATP-dependent RNA helicase A; Uncharacterized protein [Source:UniProtKB/TrEMBL;Acc:F6W5Y4]	ENSMMUT00000007925	781	1000	+
ENSMMUG00000002091	SAMHD1	Uncharacterized protein [Source:UniProtKB/TrEMBL;Acc:F6WNQ8]	ENSMMUT00000044855	1491	1740	+
ENSMMUG00000010782	PTDSS2	phosphatidylserine synthase 2 [Source:HGNC Symbol;Acc:HGNC:15463]	ENSMMUT00000015065	1301	1460	+
ENSMMUG00000010783	RNH1	Ribonuclease/angiogenin inhibitor 1; Uncharacterized protein [Source:UniProtKB/TrEMBL;Acc:F7CA88]	ENSMMUT00000044852	2661	2779	+
ENSMMUG00000008201	NDRG3	NDRG family member 3 [Source:HGNC Symbol;Acc:HGNC:14462]	ENSMMUT00000011464	1001	1100	+
ENSMMUG00000021661	LRRC56	Uncharacterized protein [Source:UniProtKB/TrEMBL;Acc:F7F5I8]	ENSMMUT00000030485	3231	3500	+
ENSMMUG00000000582	NOP58	Nucleolar protein 58; Uncharacterized protein [Source:UniProtKB/TrEMBL;Acc:F6ZQ04]	ENSMMUT00000000845	1341	1895	+
ENSMMUG00000021665	RASSF7	Ras association (RalGDS/AF-6) domain family (N-terminal) member 7 [Source:HGNC Symbol;Acc:HGNC:1166]	ENSMMUT00000044844	1521	1740	+
ENSMMUG00000008195	TGIF2	Uncharacterized protein [Source:UniProtKB/TrEMBL;Acc:F7GWV2]	ENSMMUT00000044839	614	860	+
ENSMMUG00000006589	ZNF648	zinc finger protein 648 [Source:HGNC Symbol;Acc:HGNC:18190]	ENSMMUT00000009223	221	400	+
ENSMMUG00000004012	PHRF1	PHD and ring finger domains 1 [Source:HGNC Symbol;Acc:HGNC:24351]	ENSMMUT00000005686	3491	3620	+
ENSMMUG00000021152	FAM117B	Uncharacterized protein [Source:UniProtKB/TrEMBL;Acc:F7H8Y5]	ENSMMUT00000029754	1191	1450	+
ENSMMUG00000020691	AAR2	AAR2 splicing factor homolog (S. cerevisiae) [Source:HGNC Symbol;Acc:HGNC:15886]	ENSMMUT00000029105	901	1090	+
ENSMMUG00000031286	IER5	Immediate early response gene 5 protein [Source:UniProtKB/TrEMBL;Acc:H9FB72]	ENSMMUT00000044834	751	930	+
ENSMMUG00000020023	MR1	Uncharacterized protein [Source:UniProtKB/TrEMBL;Acc:F7GIY9]	ENSMMUT00000028140	1241	1420	+
ENSMMUG00000002660	DEAF1	DEAF1 transcription factor [Source:HGNC Symbol;Acc:HGNC:14677]	ENSMMUT00000003795	1371	1650	+
ENSMMUG00000020021	STX6	Uncharacterized protein [Source:UniProtKB/TrEMBL;Acc:F7GIZ6]	ENSMMUT00000028139	951	1460	+
ENSMMUG00000020019	KIAA1614	KIAA1614 [Source:HGNC Symbol;Acc:HGNC:29327]	ENSMMUT00000028136	1791	1990	+
ENSMMUG00000009306	SCAND1	SCAN domain-containing protein 1; Uncharacterized protein [Source:UniProtKB/TrEMBL;Acc:F7H1F7]	ENSMMUT00000013004	596	770	+
ENSMMUG00000007511	PDDC1	Parkinson disease 7 domain containing 1 [Source:HGNC Symbol;Acc:HGNC:26616]	ENSMMUT00000044821	1	129	+
ENSMMUG00000007512	CEND1	BM88 antigen; Cell cycle exit and neuronal differentiation protein 1; Uncharacterized protein [Source:UniProtKB/TrEMBL;Acc:F6QDS4]	ENSMMUT00000010506	291	450	+
ENSMMUG00000016715	LRDD	Uncharacterized protein [Source:UniProtKB/TrEMBL;Acc:F6VDQ1]	ENSMMUT00000023484	2461	2700	+
ENSMMUG00000012047	QSOX1	quiescin Q6 sulfhydryl oxidase 1 [Source:HGNC Symbol;Acc:HGNC:9756]	ENSMMUT00000016874	2677	2900	+
ENSMMUG00000006017	CD28	Macaca mulatta CD28 molecule (CD28), mRNA. [Source:RefSeq mRNA;Acc:NM_001042641]	ENSMMUT00000008415	201	370	+
ENSMMUG00000010951	NFS1	Uncharacterized protein [Source:UniProtKB/TrEMBL;Acc:F7BXK5]	ENSMMUT00000044804	1851	2110	+
ENSMMUG00000020627	RPLP2	60S acidic ribosomal protein P2; Uncharacterized protein [Source:UniProtKB/TrEMBL;Acc:F7CGS1]	ENSMMUT00000029022	351	450	+
ENSMMUG00000020625	PNPLA2	patatin-like phospholipase domain containing 2 [Source:HGNC Symbol;Acc:HGNC:30802]	ENSMMUT00000029020	1321	1490	+
ENSMMUG00000020623	CD151	Macaca mulatta RNA binding protein CD151 (PETA-3), mRNA. [Source:RefSeq mRNA;Acc:NM_001032822]	ENSMMUT00000029017	1151	1330	+
ENSMMUG00000020960	CPNE1	copine I [Source:HGNC Symbol;Acc:HGNC:2314]	ENSMMUT00000029479	876	1020	+
ENSMMUG00000003618	CHID1	Chitinase domain-containing protein 1 isoform a; Uncharacterized protein [Source:UniProtKB/TrEMBL;Acc:F6QEE2]	ENSMMUT00000005126	1281	1450	+
ENSMMUG00000003620	AP2A2	adaptor-related protein complex 2, alpha 2 subunit [Source:HGNC Symbol;Acc:HGNC:562]	ENSMMUT00000005127	1841	1980	+
ENSMMUG00000023456	ERGIC3	ERGIC and golgi 3 [Source:HGNC Symbol;Acc:HGNC:15927]	ENSMMUT00000033006	1231	1335	+
ENSMMUG00000016788	NDUFS1	NADH dehydrogenase (ubiquinone) Fe-S protein 1, 75kDa (NADH-coenzyme Q reductase) [Source:HGNC Symbol;Acc:HGNC:7707]	ENSMMUT00000023589	2091	2255	+
ENSMMUG00000001054	EEF1B2	Elongation factor 1-beta; Uncharacterized protein [Source:UniProtKB/TrEMBL;Acc:F6QN95]	ENSMMUT00000001502	941	1050	+
ENSMMUG00000003104	TOLLIP	Uncharacterized protein [Source:UniProtKB/TrEMBL;Acc:F7DRQ6]	ENSMMUT00000004391	831	980	+
ENSMMUG00000007335	CEP250	centrosomal protein 250kDa [Source:HGNC Symbol;Acc:HGNC:1859]	ENSMMUT00000010254	7041	7210	+
ENSMMUG00000003768	SOAT1	sterol O-acyltransferase 1 [Source:HGNC Symbol;Acc:HGNC:11177]	ENSMMUT00000005330	1611	2082	+
ENSMMUG00000017450		Uncharacterized protein [Source:UniProtKB/TrEMBL;Acc:F6TYM1]	ENSMMUT00000044778	641	1195	+
ENSMMUG00000017735	FASTKD2	FAST kinase domains 2 [Source:HGNC Symbol;Acc:HGNC:29160]	ENSMMUT00000024934	211	760	+
ENSMMUG00000013352			ENSMMUT00000018740	1161	1400	+
ENSMMUG00000006261	TOR3A	Uncharacterized protein [Source:UniProtKB/TrEMBL;Acc:F7FUL9]	ENSMMUT00000008765	1181	1424	+
ENSMMUG00000006260	FAM20B	Glycosaminoglycan xylosylkinase; Uncharacterized protein [Source:UniProtKB/TrEMBL;Acc:F7H529]	ENSMMUT00000008763	1421	1780	+
ENSMMUG00000022602	METTL21A	Methyltransferase-like protein 21A; Uncharacterized protein [Source:UniProtKB/TrEMBL;Acc:F6Z7E5]	ENSMMUT00000031804	661	830	+
ENSMMUG00000010032	EDEM2	ER degradation-enhancing alpha-mannosidase-like 2; ER degradation-enhancing alpha-mannosidase-like 2 isoform 1; Uncharacterized protein [Source:UniProtKB/TrEMBL;Acc:F6Q1A3]	ENSMMUT00000014003	1421	1853	+
ENSMMUG00000017551	RALGPS2	Uncharacterized protein [Source:UniProtKB/TrEMBL;Acc:F6TH23]	ENSMMUT00000024689	1651	2110	+
ENSMMUG00000017550		Uncharacterized protein [Source:UniProtKB/TrEMBL;Acc:F6RJV5]	ENSMMUT00000030947	833	950	+
ENSMMUG00000000229	TRPC4AP	Short transient receptor potential channel 4-associated protein; Uncharacterized protein [Source:UniProtKB/TrEMBL;Acc:F6XAU6]	ENSMMUT00000000342	2061	2220	+
ENSMMUG00000017524	PIKFYVE	phosphoinositide kinase, FYVE finger containing [Source:HGNC Symbol;Acc:HGNC:23785]	ENSMMUT00000024646	6321	6580	+
ENSMMUG00000017940	GSS	glutathione synthetase [Source:HGNC Symbol;Acc:HGNC:4624]	ENSMMUT00000025208	1041	1250	+
ENSMMUG00000017932	ACSS2	Uncharacterized protein [Source:UniProtKB/TrEMBL;Acc:F7AV12]	ENSMMUT00000025206	2771	2893	+
ENSMMUG00000002043	CD81	CD81 antigen; Uncharacterized protein [Source:UniProtKB/TrEMBL;Acc:F6WY45]	ENSMMUT00000002892	1341	1476	+
ENSMMUG00000015948	MGST3	Microsomal glutathione S-transferase 3; Uncharacterized protein [Source:UniProtKB/TrEMBL;Acc:F7B1G5]	ENSMMUT00000044729	21	160	+
ENSMMUG00000007753	NAP1L4	nucleosome assembly protein 1-like 4 [Source:HGNC Symbol;Acc:HGNC:7640]	ENSMMUT00000010857	1011	1120	+
ENSMMUG00000017682	PIGU	Uncharacterized protein [Source:UniProtKB/TrEMBL;Acc:F6UA73]	ENSMMUT00000024856	1439	1800	+
ENSMMUG00000000511	CARS	Uncharacterized protein [Source:UniProtKB/TrEMBL;Acc:F6YB56]	ENSMMUT00000044727	2071	2470	+
ENSMMUG00000010520	LANCL1	LanC-like protein 1; Uncharacterized protein [Source:UniProtKB/TrEMBL;Acc:F7B2A9]	ENSMMUT00000014719	1261	1417	+
ENSMMUG00000015946	ALDH9A1	aldehyde dehydrogenase 9 family, member A1 [Source:HGNC Symbol;Acc:HGNC:412]	ENSMMUT00000022424	1331	1460	+
ENSMMUG00000005585	TMCO1	Transmembrane and coiled-coil domain-containing protein 1; Uncharacterized protein [Source:UniProtKB/TrEMBL;Acc:F7G4J4]	ENSMMUT00000007853	151	408	+
ENSMMUG00000017681	MAP1LC3A	Microtubule-associated proteins 1A/1B light chain 3A isoform a; Uncharacterized protein [Source:UniProtKB/TrEMBL;Acc:F6UA91]	ENSMMUT00000024855	781	945	+
ENSMMUG00000000565	UCK2	Uridine kinase [Source:UniProtKB/TrEMBL;Acc:F6ZWL3]	ENSMMUT00000000821	1191	1290	+
ENSMMUG00000012912	ITCH	itchy E3 ubiquitin protein ligase [Source:HGNC Symbol;Acc:HGNC:13890]	ENSMMUT00000018113	2761	2970	+
ENSMMUG00000017789	POGK	Pogo transposable element with KRAB domain; Uncharacterized protein [Source:UniProtKB/TrEMBL;Acc:F7EU02]	ENSMMUT00000025001	1361	1500	+
ENSMMUG00000016306		Adenosylhomocysteinase [Source:UniProtKB/TrEMBL;Acc:F7GT77]	ENSMMUT00000022902	1263	2050	+
ENSMMUG00000023543	NECAB3	N-terminal EF-hand calcium binding protein 3 [Source:HGNC Symbol;Acc:HGNC:15851]	ENSMMUT00000033120	1051	1260	+
ENSMMUG00000011976	DHCR7	7-dehydrocholesterol reductase [Source:HGNC Symbol;Acc:HGNC:2860]	ENSMMUT00000016774	1256	1430	+
ENSMMUG00000009184	MPZL1	Uncharacterized protein [Source:UniProtKB/TrEMBL;Acc:F7HPB4]	ENSMMUT00000012838	581	720	+
ENSMMUG00000010389	DCAF6	Uncharacterized protein [Source:UniProtKB/TrEMBL;Acc:F7BF92]	ENSMMUT00000014535	1851	2150	+
ENSMMUG00000012318	ATIC	5-aminoimidazole-4-carboxamide ribonucleotide formyltransferase/IMP cyclohydrolase [Source:HGNC Symbol;Acc:HGNC:794]	ENSMMUT00000017264	51	180	+
ENSMMUG00000021166	TIPRL	TOR signaling pathway regulator [Source:HGNC Symbol;Acc:HGNC:30231]	ENSMMUT00000029776	650	820	+
ENSMMUG00000010784	TPCN2	two pore segment channel 2 [Source:HGNC Symbol;Acc:HGNC:20820]	ENSMMUT00000015074	2631	2832	+
ENSMMUG00000010204		40S ribosomal protein S12 [Source:UniProtKB/TrEMBL;Acc:F6SIP5]	ENSMMUT00000014245	307	468	+
ENSMMUG00000010128	IGHMBP2	immunoglobulin mu binding protein 2 [Source:HGNC Symbol;Acc:HGNC:5542]	ENSMMUT00000014141	2601	2760	+
ENSMMUG00000021078	ATP1B1	Sodium/potassium-transporting ATPase subunit beta-1; Uncharacterized protein [Source:UniProtKB/TrEMBL;Acc:F7CJP4]	ENSMMUT00000044679	1231	1467	+
ENSMMUG00000007117	ASXL1	Additional sex combs-like protein 1; Uncharacterized protein [Source:UniProtKB/TrEMBL;Acc:F7DTX3]	ENSMMUT00000009931	2771	2920	+
ENSMMUG00000012897	KIF3B	Kinesin-like protein KIF3B; Microtubule plus end-directed kinesin motor 3B; Uncharacterized protein [Source:UniProtKB/TrEMBL;Acc:F6S877]	ENSMMUT00000018090	2281	2470	+
ENSMMUG00000008979	POFUT1	protein O-fucosyltransferase 1 [Source:HGNC Symbol;Acc:HGNC:14988]	ENSMMUT00000008842	984	1200	+
ENSMMUG00000000118	PLAGL2	Pleiomorphic adenoma-like protein 2; Uncharacterized protein; Zinc finger protein PLAGL2 [Source:UniProtKB/TrEMBL;Acc:F7H8A5]	ENSMMUT00000000169	2431	2570	+
ENSMMUG00000017416	TM9SF4	Uncharacterized protein [Source:UniProtKB/TrEMBL;Acc:F7CJR7]	ENSMMUT00000044673	3631	3920	+
ENSMMUG00000016213	PPP6R3	protein phosphatase 6, regulatory subunit 3 [Source:HGNC Symbol;Acc:HGNC:1173]	ENSMMUT00000022783	4236	4490	+
ENSMMUG00000013039	SLC19A2	Uncharacterized protein [Source:UniProtKB/TrEMBL;Acc:F7H816]	ENSMMUT00000018296	1771	1870	+
ENSMMUG00000000966	TPX2	Uncharacterized protein [Source:UniProtKB/TrEMBL;Acc:F6QQI0]	ENSMMUT00000001379	2741	2920	+
ENSMMUG00000023192	CHKA	choline kinase alpha [Source:HGNC Symbol;Acc:HGNC:1937]	ENSMMUT00000032626	1421	1600	+
ENSMMUG00000023190	TCIRG1	Uncharacterized protein [Source:UniProtKB/TrEMBL;Acc:F7EFI0]	ENSMMUT00000032623	799	1050	+
ENSMMUG00000017964	PECR	Uncharacterized protein [Source:UniProtKB/TrEMBL;Acc:F7DTT0]	ENSMMUT00000025238	831	1039	+
ENSMMUG00000005119	HM13	Minor histocompatibility antigen H13 isoform 3; Uncharacterized protein [Source:UniProtKB/TrEMBL;Acc:F7BXY7]	ENSMMUT00000007221	1381	1730	+
ENSMMUG00000023184	UNC93B1	Uncharacterized protein [Source:UniProtKB/TrEMBL;Acc:F7EJ77]	ENSMMUT00000032611	2211	2310	+
ENSMMUG00000019539	SMARCAL1	Uncharacterized protein [Source:UniProtKB/TrEMBL;Acc:F7CK94]	ENSMMUT00000027448	741	1020	+
ENSMMUG00000018528	NUDT8	nudix (nucleoside diphosphate linked moiety X)-type motif 8 [Source:HGNC Symbol;Acc:HGNC:8055]	ENSMMUT00000026051	351	510	+
ENSMMUG00000005262	ZCCHC3	Uncharacterized protein [Source:UniProtKB/TrEMBL;Acc:F7BPQ3]	ENSMMUT00000007406	361	920	+
ENSMMUG00000011821	PITPNM1	phosphatidylinositol transfer protein, membrane-associated 1 [Source:HGNC Symbol;Acc:HGNC:9003]	ENSMMUT00000016563	3541	3790	+
ENSMMUG00000012601	RBCK1	Uncharacterized protein [Source:UniProtKB/TrEMBL;Acc:F7CKH7]	ENSMMUT00000044638	421	520	+
ENSMMUG00000004461	TBC1D20	TBC1 domain family, member 20 [Source:HGNC Symbol;Acc:HGNC:16133]	ENSMMUT00000006318	791	1120	+
ENSMMUG00000031224	CSNK2A1	Casein kinase II subunit alpha isoform a; Uncharacterized protein [Source:UniProtKB/TrEMBL;Acc:F7CKR9]	ENSMMUT00000044635	2351	2520	+
ENSMMUG00000022808	ARPC2	Uncharacterized protein [Source:UniProtKB/TrEMBL;Acc:F6UWA0]	ENSMMUT00000032100	451	590	+
ENSMMUG00000005483	RPS6KB2	ribosomal protein S6 kinase, 70kDa, polypeptide 2 [Source:HGNC Symbol;Acc:HGNC:10437]	ENSMMUT00000007715	1311	1490	+
ENSMMUG00000017353	SRXN1	Sulfiredoxin-1; Uncharacterized protein [Source:UniProtKB/TrEMBL;Acc:F7H9B2]	ENSMMUT00000024401	281	410	+
ENSMMUG00000013639	BAT2L2	Uncharacterized protein [Source:UniProtKB/TrEMBL;Acc:F7GIJ3]	ENSMMUT00000019149	4521	4630	+
ENSMMUG00000022812	AAMP	Macaca mulatta angio-associated, migratory cell protein (AAMP), mRNA. [Source:RefSeq mRNA;Acc:NM_001171059]	ENSMMUT00000044621	13	340	+
ENSMMUG00000007266	METTL13	Uncharacterized protein [Source:UniProtKB/TrEMBL;Acc:F7FCH5]	ENSMMUT00000010151	2011	2220	+
ENSMMUG00000017280	TBC1D10C	Uncharacterized protein [Source:UniProtKB/TrEMBL;Acc:F7CR35]	ENSMMUT00000024290	1241	1730	+
ENSMMUG00000018473	SIRPG	signal-regulatory protein gamma [Source:HGNC Symbol;Acc:HGNC:15757]	ENSMMUT00000030350	1391	1600	+
ENSMMUG00000022817	TMBIM1	Transmembrane BAX inhibitor motif-containing protein 1; Uncharacterized protein [Source:UniProtKB/TrEMBL;Acc:F6UPC8]	ENSMMUT00000032112	1281	1410	+
ENSMMUG00000004523	POLD4	DNA polymerase delta subunit 4; DNA polymerase delta subunit p12; Uncharacterized protein [Source:UniProtKB/TrEMBL;Acc:F6SCR4]	ENSMMUT00000006404	744	910	+
ENSMMUG00000015928	ANKRD13D	ankyrin repeat domain 13 family, member D [Source:HGNC Symbol;Acc:HGNC:27880]	ENSMMUT00000044611	1831	1990	+
ENSMMUG00000010050	SNRPB	Small nuclear ribonucleoprotein-associated protein [Source:UniProtKB/TrEMBL;Acc:F6TEX8]	ENSMMUT00000014035	991	1111	+
ENSMMUG00000007280	SUCO	SUN domain containing ossification factor [Source:HGNC Symbol;Acc:HGNC:1240]	ENSMMUT00000019300	5641	5767	+
ENSMMUG00000015268	CTDSP1	Carboxy-terminal domain RNA polymerase II polypeptide A small phosphatase 1 isoform 1; Uncharacterized protein [Source:UniProtKB/TrEMBL;Acc:F7DV44]	ENSMMUT00000021406	2511	2630	+
ENSMMUG00000008771	KDM2A	Lysine-specific demethylase 2A; Lysine-specific demethylase 2A isoform a; Uncharacterized protein [Source:UniProtKB/TrEMBL;Acc:F7DKL6]	ENSMMUT00000012253	3681	3890	+
ENSMMUG00000007285	FASLG	Macaca mulatta Fas ligand (TNF superfamily, member 6) (FASLG), mRNA. [Source:RefSeq mRNA;Acc:NM_001032838]	ENSMMUT00000010180	1191	1440	+
ENSMMUG00000013888	NOP56	Uncharacterized protein [Source:UniProtKB/TrEMBL;Acc:F6R553]	ENSMMUT00000019496	1451	1650	+
ENSMMUG00000021328	IDH3B	Uncharacterized protein [Source:UniProtKB/TrEMBL;Acc:F6URC2]	ENSMMUT00000030015	1421	1520	+
ENSMMUG00000004533	PC	Pyruvate carboxylase [Source:UniProtKB/TrEMBL;Acc:F6SC45]	ENSMMUT00000006414	3331	3630	+
ENSMMUG00000005510	TNFSF4	Uncharacterized protein [Source:UniProtKB/TrEMBL;Acc:F7FL80]	ENSMMUT00000007751	861	1360	+
ENSMMUG00000006737	ZNF142	Uncharacterized protein [Source:UniProtKB/TrEMBL;Acc:F7HF94]	ENSMMUT00000009431	4941	5170	+
ENSMMUG00000004534	LRFN4	Uncharacterized protein [Source:UniProtKB/TrEMBL;Acc:F6SC36]	ENSMMUT00000006415	1021	1180	+
ENSMMUG00000006740	BCS1L	BC1 (ubiquinol-cytochrome c reductase) synthesis-like [Source:HGNC Symbol;Acc:HGNC:1020]	ENSMMUT00000044598	612	870	+
ENSMMUG00000004531	RCE1	CAAX prenyl protease 2 isoform 1; Uncharacterized protein [Source:UniProtKB/TrEMBL;Acc:F6SC53]	ENSMMUT00000006413	881	1431	+
ENSMMUG00000022798	DARS2	aspartyl-tRNA synthetase 2, mitochondrial [Source:HGNC Symbol;Acc:HGNC:25538]	ENSMMUT00000032079	1751	1930	+
ENSMMUG00000020363	RBM4	Uncharacterized protein [Source:UniProtKB/TrEMBL;Acc:F6W8J1]	ENSMMUT00000044584	1181	1380	+
ENSMMUG00000005200	FAM113A	Uncharacterized protein [Source:UniProtKB/TrEMBL;Acc:F7CSK4]	ENSMMUT00000007324	1711	1997	+
ENSMMUG00000007830	RBM14	RNA binding motif protein 14 [Source:HGNC Symbol;Acc:HGNC:14219]	ENSMMUT00000010964	471	710	+
ENSMMUG00000005513	CCS	Copper chaperone for superoxide dismutase; Superoxide dismutase copper chaperone; Uncharacterized protein [Source:UniProtKB/TrEMBL;Acc:F7FL64]	ENSMMUT00000007754	861	1050	+
ENSMMUG00000002496	CTSF	cathepsin F [Source:HGNC Symbol;Acc:HGNC:2531]	ENSMMUT00000044575	1731	1920	+
ENSMMUG00000005204	VPS16	Uncharacterized protein [Source:UniProtKB/TrEMBL;Acc:F6QQW0]	ENSMMUT00000044573	2531	2679	+
ENSMMUG00000001571	CACYBP	Calcyclin-binding protein isoform 1; Uncharacterized protein [Source:UniProtKB/TrEMBL;Acc:F7FP94]	ENSMMUT00000002223	571	908	+
ENSMMUG00000005878	PTPRA	protein tyrosine phosphatase, receptor type, A [Source:HGNC Symbol;Acc:HGNC:9664]	ENSMMUT00000008238	521	670	+
ENSMMUG00000000546			ENSMMUT00000000794	1	270	+
ENSMMUG00000000791	CNPPD1	Protein CNPPD1; Uncharacterized protein [Source:UniProtKB/TrEMBL;Acc:F6RA57]	ENSMMUT00000001143	1131	1240	+
ENSMMUG00000011158	DPP3	dipeptidyl-peptidase 3 [Source:HGNC Symbol;Acc:HGNC:3008]	ENSMMUT00000015596	821	960	+
ENSMMUG00000000792	FAM134A	family with sequence similarity 134, member A [Source:HGNC Symbol;Acc:HGNC:28450]	ENSMMUT00000001148	1101	1630	+
ENSMMUG00000002072	RFWD2	E3 ubiquitin-protein ligase RFWD2 isoform a; Uncharacterized protein [Source:UniProtKB/TrEMBL;Acc:F6QR11]	ENSMMUT00000044569	2571	2732	+
ENSMMUG00000019616	ABCB6	ATP-binding cassette, sub-family B (MDR/TAP), member 6 [Source:HGNC Symbol;Acc:HGNC:47]	ENSMMUT00000027546	2741	2970	+
ENSMMUG00000019619	ATG9A	Uncharacterized protein [Source:UniProtKB/TrEMBL;Acc:F6QR66]	ENSMMUT00000027554	2791	3090	+
ENSMMUG00000031203	ITPA	Inosine triphosphate pyrophosphatase [Source:UniProtKB/TrEMBL;Acc:F6QR76]	ENSMMUT00000044561	855	1067	+
ENSMMUG00000014510	ANKZF1	ankyrin repeat and zinc finger domain containing 1 [Source:HGNC Symbol;Acc:HGNC:25527]	ENSMMUT00000020352	1868	2140	+
ENSMMUG00000019626	STK16	Uncharacterized protein [Source:UniProtKB/TrEMBL;Acc:F7B0W4]	ENSMMUT00000027568	1151	1290	+
ENSMMUG00000022518	PACS1	phosphofurin acidic cluster sorting protein 1 [Source:HGNC Symbol;Acc:HGNC:30032]	ENSMMUT00000031680	1461	1670	+
ENSMMUG00000022283	ATRN	attractin [Source:HGNC Symbol;Acc:HGNC:885]	ENSMMUT00000031348	4071	4596	+
ENSMMUG00000019628	TUBA4A	Tubulin alpha-4A chain; Uncharacterized protein [Source:UniProtKB/TrEMBL;Acc:F6QRE8]	ENSMMUT00000044554	1221	1424	+
ENSMMUG00000011743	SF3B2	splicing factor 3b, subunit 2, 145kDa [Source:HGNC Symbol;Acc:HGNC:10769]	ENSMMUT00000016447	2571	2675	+
ENSMMUG00000012003	DNAJB2	Uncharacterized protein [Source:UniProtKB/TrEMBL;Acc:F7H055]	ENSMMUT00000016817	1011	1480	+
ENSMMUG00000000634	ZNF692	Uncharacterized protein [Source:UniProtKB/TrEMBL;Acc:F6QRI7]	ENSMMUT00000000912	1722	1913	+
ENSMMUG00000019115	EIF1AD	Eukaryotic translation initiation factor 1A domain-containing protein; Putative RNA-binding protein EIF1AD; Uncharacterized protein [Source:UniProtKB/TrEMBL;Acc:F6T7W0]	ENSMMUT00000026863	581	830	+
ENSMMUG00000000632	SH3BP5L	SH3 domain-binding protein 5-like; Uncharacterized protein [Source:UniProtKB/TrEMBL;Acc:F6Y0K6]	ENSMMUT00000000907	2024	2400	+
ENSMMUG00000019012	EFEMP2	Uncharacterized protein [Source:UniProtKB/TrEMBL;Acc:F6QSF0]	ENSMMUT00000044538	1821	2143	+
ENSMMUG00000022079	C20orf27	chromosome 20 open reading frame 27 [Source:HGNC Symbol;Acc:HGNC:15873]	ENSMMUT00000031062	1751	1880	+
ENSMMUG00000018922	CDC25B	cell division cycle 25B [Source:HGNC Symbol;Acc:HGNC:1726]	ENSMMUT00000026604	2581	2830	+
ENSMMUG00000019585	ZNF496	zinc finger protein 496 [Source:HGNC Symbol;Acc:HGNC:23713]	ENSMMUT00000027506	1891	2300	+
ENSMMUG00000019014	MUS81	MUS81 structure-specific endonuclease subunit [Source:HGNC Symbol;Acc:HGNC:29814]	ENSMMUT00000026719	2161	2306	+
ENSMMUG00000019956	PANK2	Uncharacterized protein [Source:UniProtKB/TrEMBL;Acc:F6QZB9]	ENSMMUT00000028051	1673	1870	+
ENSMMUG00000016408	AHCTF1	AT hook containing transcription factor 1 [Source:HGNC Symbol;Acc:HGNC:24618]	ENSMMUT00000023043	6561	6940	+
ENSMMUG00000004703	RNF24	ring finger protein 24 [Source:HGNC Symbol;Acc:HGNC:13779]	ENSMMUT00000006643	571	670	+
ENSMMUG00000017938	GMPPA	Mannose-1-phosphate guanyltransferase alpha; Uncharacterized protein [Source:UniProtKB/TrEMBL;Acc:F6QZY6]	ENSMMUT00000044527	1731	1830	+
ENSMMUG00000019949	PRNP	Macaca mulatta prion protein (PRNP), mRNA. [Source:RefSeq mRNA;Acc:NM_001047152]	ENSMMUT00000028037	62	744	+
ENSMMUG00000019839	KAT5	Uncharacterized protein [Source:UniProtKB/TrEMBL;Acc:F6QZE4]	ENSMMUT00000027881	291	420	+
ENSMMUG00000007418	RELA	Uncharacterized protein [Source:UniProtKB/TrEMBL;Acc:F6QZH6]	ENSMMUT00000044528	1489	1629	+
ENSMMUG00000020005	SLC23A1	Sodium-dependent vitamin C transporter 2; Solute carrier family 23 member 2; Uncharacterized protein [Source:UniProtKB/TrEMBL;Acc:F6R000]	ENSMMUT00000044526	2831	3020	+
ENSMMUG00000007416	SIPA1	Uncharacterized protein [Source:UniProtKB/TrEMBL;Acc:F6SXF3]	ENSMMUT00000010366	271	730	+
ENSMMUG00000007408		Uncharacterized protein [Source:UniProtKB/TrEMBL;Acc:F6SXG8]	ENSMMUT00000010364	2501	2730	+
ENSMMUG00000007406	PCNXL3	Uncharacterized protein [Source:UniProtKB/TrEMBL;Acc:F6T3E7]	ENSMMUT00000010354	911	1190	+
ENSMMUG00000013258	TMEM230	UPF0414 transmembrane protein C20orf30 isoform 1; Uncharacterized protein [Source:UniProtKB/TrEMBL;Acc:F6R010]	ENSMMUT00000018612	501	919	+
ENSMMUG00000007404	MAP3K11	Mitogen-activated protein kinase kinase kinase 11; Uncharacterized protein [Source:UniProtKB/TrEMBL;Acc:F6T3F7]	ENSMMUT00000010353	2851	3100	+
ENSMMUG00000013259	PCNA	Proliferating cell nuclear antigen [Source:UniProtKB/TrEMBL;Acc:F6ZD63]	ENSMMUT00000018615	1	100	+
ENSMMUG00000013242	CHPF	Chondroitin sulfate synthase 2 isoform 1; Uncharacterized protein [Source:UniProtKB/TrEMBL;Acc:F6ZK43]	ENSMMUT00000018592	2331	2520	+
ENSMMUG00000022208	SCCPDH	saccharopine dehydrogenase (putative) [Source:HGNC Symbol;Acc:HGNC:24275]	ENSMMUT00000031237	941	1100	+
ENSMMUG00000013261	CDS2	CDP-diacylglycerol synthase (phosphatidate cytidylyltransferase) 2 [Source:HGNC Symbol;Acc:HGNC:1801]	ENSMMUT00000018617	1208	1425	+
ENSMMUG00000011380	CNST	consortin, connexin sorting protein [Source:HGNC Symbol;Acc:HGNC:26486]	ENSMMUT00000044519	1341	1640	+
ENSMMUG00000014169	EHBP1L1	Uncharacterized protein [Source:UniProtKB/TrEMBL;Acc:F7ALS2]	ENSMMUT00000019884	3511	3750	+
ENSMMUG00000022915	TFB2M	Uncharacterized protein [Source:UniProtKB/TrEMBL;Acc:F6W6K7]	ENSMMUT00000032256	1251	1460	+
ENSMMUG00000001809	GPCPD1	glycerophosphocholine phosphodiesterase GDE1 homolog (S. cerevisiae) [Source:HGNC Symbol;Acc:HGNC:26957]	ENSMMUT00000002545	1561	1900	+
ENSMMUG00000031183	FAM89B	Uncharacterized protein [Source:UniProtKB/TrEMBL;Acc:F6R0S9]	ENSMMUT00000044516	1291	1390	+
ENSMMUG00000002519	STK11IP	Uncharacterized protein [Source:UniProtKB/TrEMBL;Acc:F7HCE7]	ENSMMUT00000003584	3281	3550	+
ENSMMUG00000013728	TRMT6	Uncharacterized protein [Source:UniProtKB/TrEMBL;Acc:F6RNX4]	ENSMMUT00000019293	831	1040	+
ENSMMUG00000023477	SCYL1	SCY1-like 1 (S. cerevisiae) [Source:HGNC Symbol;Acc:HGNC:14372]	ENSMMUT00000033028	2241	2420	+
ENSMMUG00000013740	MCM8	Uncharacterized protein [Source:UniProtKB/TrEMBL;Acc:F6R1F4]	ENSMMUT00000044502	2971	3136	+
ENSMMUG00000023300	FRMD8	Uncharacterized protein [Source:UniProtKB/TrEMBL;Acc:F7FB33]	ENSMMUT00000032778	1281	1390	+
ENSMMUG00000023297	SLC25A45	Uncharacterized protein [Source:UniProtKB/TrEMBL;Acc:F6R1G1]	ENSMMUT00000032777	675	934	+
ENSMMUG00000031175	COX20	Putative uncharacterized protein FAM36A; Uncharacterized protein [Source:UniProtKB/TrEMBL;Acc:F6R113]	ENSMMUT00000044503	321	450	+
ENSMMUG00000022310	PPPDE1	Uncharacterized protein [Source:UniProtKB/TrEMBL;Acc:F6XDP6]	ENSMMUT00000031390	641	940	+
ENSMMUG00000013744	CRLS1	cardiolipin synthase 1 [Source:HGNC Symbol;Acc:HGNC:16148]	ENSMMUT00000019299	202	360	+
ENSMMUG00000022031	POLA2	DNA polymerase alpha subunit B [Source:UniProtKB/TrEMBL;Acc:F7HTD4]	ENSMMUT00000030995	2351	2467	+
ENSMMUG00000000016	ADSS	Adenylosuccinate synthetase isozyme 2 [Source:UniProtKB/TrEMBL;Acc:F7HTL0]	ENSMMUT00000000024	1382	1635	+
ENSMMUG00000013475	CAPN1	Uncharacterized protein [Source:UniProtKB/TrEMBL;Acc:F6ZLR4]	ENSMMUT00000018915	2701	2923	+
ENSMMUG00000021137	TMX4	Thioredoxin-related transmembrane protein 4; Uncharacterized protein [Source:UniProtKB/TrEMBL;Acc:F7HDA1]	ENSMMUT00000029730	1821	2070	+
ENSMMUG00000018781	SYVN1	E3 ubiquitin-protein ligase synoviolin isoform b; Uncharacterized protein [Source:UniProtKB/TrEMBL;Acc:F6ZQL6]	ENSMMUT00000026406	1021	1180	+
ENSMMUG00000006159	WDFY1	WD repeat and FYVE domain containing 1 [Source:HGNC Symbol;Acc:HGNC:20451]	ENSMMUT00000044489	1	110	+
ENSMMUG00000018778	MRPL49	39S ribosomal protein L49, mitochondrial; Uncharacterized protein [Source:UniProtKB/TrEMBL;Acc:F6ZWE1]	ENSMMUT00000026397	511	746	+
ENSMMUG00000019914	CEP170	centrosomal protein 170kDa [Source:HGNC Symbol;Acc:HGNC:28920]	ENSMMUT00000044485	4801	4930	+
ENSMMUG00000018775	ZNHIT2	zinc finger, HIT-type containing 2 [Source:HGNC Symbol;Acc:HGNC:1177]	ENSMMUT00000026394	1181	1300	+
ENSMMUG00000018773	TM7SF2	transmembrane 7 superfamily member 2 [Source:HGNC Symbol;Acc:HGNC:11863]	ENSMMUT00000026393	1582	1800	+
ENSMMUG00000022259	CUL3	Cullin-3; Uncharacterized protein [Source:UniProtKB/TrEMBL;Acc:F6R900]	ENSMMUT00000044483	2111	2520	+
ENSMMUG00000018139		Uncharacterized protein [Source:UniProtKB/TrEMBL;Acc:F6SUF4]	ENSMMUT00000025488	841	1010	+
ENSMMUG00000031168	SAC3D1	SAC3 domain containing 1 [Source:HGNC Symbol;Acc:HGNC:30179]	ENSMMUT00000044479	1141	1490	+
ENSMMUG00000008761	EXO1	exonuclease 1 [Source:HGNC Symbol;Acc:HGNC:3511]	ENSMMUT00000044472	2241	2430	+
ENSMMUG00000000722	RHBDD1	rhomboid domain containing 1 [Source:HGNC Symbol;Acc:HGNC:23081]	ENSMMUT00000001039	191	450	+
ENSMMUG00000018116	JAG1	jagged 1 [Source:HGNC Symbol;Acc:HGNC:6188]	ENSMMUT00000025448	3318	3660	+
ENSMMUG00000003975	PPP2R5B	protein phosphatase 2, regulatory subunit B', beta [Source:HGNC Symbol;Acc:HGNC:9310]	ENSMMUT00000005635	1121	1260	+
ENSMMUG00000018913	BTBD3	Uncharacterized protein [Source:UniProtKB/TrEMBL;Acc:F6ZZJ5]	ENSMMUT00000026589	1211	1670	+
ENSMMUG00000003973	ATG2A	autophagy related 2A [Source:HGNC Symbol;Acc:HGNC:29028]	ENSMMUT00000005632	5731	6240	+
ENSMMUG00000003972	EHD1	EH domain-containing protein 1; Testilin; Uncharacterized protein [Source:UniProtKB/TrEMBL;Acc:F6XYM2]	ENSMMUT00000005630	1881	2130	+
ENSMMUG00000012354	NDUFAF5	Uncharacterized protein [Source:UniProtKB/TrEMBL;Acc:F7EJI0]	ENSMMUT00000017319	891	1053	+
ENSMMUG00000005669	OPN3	opsin 3 [Source:HGNC Symbol;Acc:HGNC:14007]	ENSMMUT00000007970	521	720	+
ENSMMUG00000010872			ENSMMUT00000015205	290	398	+
ENSMMUG00000005667	FH	fumarate hydratase [Source:HGNC Symbol;Acc:HGNC:3700]	ENSMMUT00000007968	1361	1562	+
ENSMMUG00000007545			ENSMMUT00000010553	1457	1630	+
ENSMMUG00000013246		Uncharacterized protein [Source:UniProtKB/TrEMBL;Acc:F6SVD6]	ENSMMUT00000018594	281	440	+
ENSMMUG00000013247	AGFG1	Uncharacterized protein [Source:UniProtKB/TrEMBL;Acc:F6SVJ9]	ENSMMUT00000044444	1431	1760	+
ENSMMUG00000013786	DSTN	Uncharacterized protein [Source:UniProtKB/TrEMBL;Acc:F6TEG7]	ENSMMUT00000019359	591	700	+
ENSMMUG00000007610	RPS6KA4	Uncharacterized protein [Source:UniProtKB/TrEMBL;Acc:F6SDE0]	ENSMMUT00000010650	2441	2580	+
ENSMMUG00000011476	SNX5	Uncharacterized protein [Source:UniProtKB/TrEMBL;Acc:F6T231]	ENSMMUT00000044432	1141	1550	+
ENSMMUG00000015842	TRIP12	thyroid hormone receptor interactor 12 [Source:HGNC Symbol;Acc:HGNC:12306]	ENSMMUT00000022264	5951	6120	+
ENSMMUG00000011479	C10H20ORF72	Uncharacterized protein [Source:UniProtKB/TrEMBL;Acc:F7ADZ7]	ENSMMUT00000016070	1171	1350	+
ENSMMUG00000017803	ESRRA	Uncharacterized protein [Source:UniProtKB/TrEMBL;Acc:F6T237]	ENSMMUT00000012293	1391	1622	+
ENSMMUG00000012199	SP140	SP140 nuclear body protein [Source:HGNC Symbol;Acc:HGNC:17133]	ENSMMUT00000017083	2591	2740	+
ENSMMUG00000023140	PET117	Cytochrome c oxidase assembly factor-like; Uncharacterized protein [Source:UniProtKB/TrEMBL;Acc:F7DFJ7]	ENSMMUT00000032553	1301	1570	+
ENSMMUG00000010073	MTR	5-methyltetrahydrofolate-homocysteine methyltransferase [Source:HGNC Symbol;Acc:HGNC:7468]	ENSMMUT00000014067	3451	3550	+
ENSMMUG00000012948	PLCB3	Uncharacterized protein [Source:UniProtKB/TrEMBL;Acc:F6RJC0]	ENSMMUT00000018158	3098	3440	+
ENSMMUG00000006222	ITM2C	Uncharacterized protein [Source:UniProtKB/TrEMBL;Acc:F7HLD2]	ENSMMUT00000008702	91	200	+
ENSMMUG00000004146	RBBP9	Uncharacterized protein [Source:UniProtKB/TrEMBL;Acc:F6XKM4]	ENSMMUT00000005882	431	560	+
ENSMMUG00000012878	SEC23B	Uncharacterized protein [Source:UniProtKB/TrEMBL;Acc:F6SFU7]	ENSMMUT00000018065	2261	2420	+
ENSMMUG00000031146	C2orf72	chromosome 2 open reading frame 72 [Source:HGNC Symbol;Acc:HGNC:27418]	ENSMMUT00000044421	351	500	+
ENSMMUG00000012945	FKBP2	Peptidyl-prolyl cis-trans isomerase [Source:UniProtKB/TrEMBL;Acc:F6RJJ7]	ENSMMUT00000018154	471	630	+
ENSMMUG00000011769	PSMD1	proteasome (prosome, macropain) 26S subunit, non-ATPase, 1 [Source:HGNC Symbol;Acc:HGNC:9554]	ENSMMUT00000016500	2410	2730	+
ENSMMUG00000012944	VEGFB	Uncharacterized protein; Vascular endothelial growth factor B [Source:UniProtKB/TrEMBL;Acc:F6RJK6]	ENSMMUT00000018151	751	980	+
ENSMMUG00000012941	NUDT22	Uncharacterized protein [Source:UniProtKB/TrEMBL;Acc:F6RJR0]	ENSMMUT00000018147	991	1090	+
ENSMMUG00000012940	TRPT1	tRNA phosphotransferase 1 [Source:HGNC Symbol;Acc:HGNC:20316]	ENSMMUT00000018146	801	927	+
ENSMMUG00000012939	FERMT3	fermitin family member 3 [Source:HGNC Symbol;Acc:HGNC:23151]	ENSMMUT00000018145	2041	2220	+
ENSMMUG00000031145		Uncharacterized protein [Source:UniProtKB/TrEMBL;Acc:F6T953]	ENSMMUT00000044412	291	445	+
ENSMMUG00000012880	DTD1	D-tyrosyl-tRNA(Tyr) deacylase [Source:UniProtKB/TrEMBL;Acc:F6SFP9]	ENSMMUT00000018068	901	1050	+
ENSMMUG00000009932			ENSMMUT00000013866	11	150	+
ENSMMUG00000019565	PDE6D	Retinal rod rhodopsin-sensitive cGMP 3',5'-cyclic phosphodiesterase subunit delta; Uncharacterized protein [Source:UniProtKB/TrEMBL;Acc:F7BMR1]	ENSMMUT00000027484	13	230	+
ENSMMUG00000000479	MACROD1	Uncharacterized protein [Source:UniProtKB/TrEMBL;Acc:F6YJM3]	ENSMMUT00000000706	1051	1200	+
ENSMMUG00000022831	COPS7B	Uncharacterized protein [Source:UniProtKB/TrEMBL;Acc:F6T991]	ENSMMUT00000044406	1831	1996	+
ENSMMUG00000015132	LGALS8	Galectin-8 isoform b; Uncharacterized protein [Source:UniProtKB/TrEMBL;Acc:F6UKX3]	ENSMMUT00000021214	1281	1411	+
ENSMMUG00000007709	CRNKL1	crooked neck pre-mRNA splicing factor 1 [Source:HGNC Symbol;Acc:HGNC:15762]	ENSMMUT00000044404	181	350	+
ENSMMUG00000014131	MARK2	MAP/microtubule affinity-regulating kinase 2 [Source:HGNC Symbol;Acc:HGNC:3332]	ENSMMUT00000044397	1991	2390	+
ENSMMUG00000022151	EIF4E2	Uncharacterized protein [Source:UniProtKB/TrEMBL;Acc:F6TAR5]	ENSMMUT00000031159	40	200	+
ENSMMUG00000012211	GIGYF2	GRB10 interacting GYF protein 2 [Source:HGNC Symbol;Acc:HGNC:11960]	ENSMMUT00000044386	4351	4480	+
ENSMMUG00000005776	ATL3	atlastin GTPase 3 [Source:HGNC Symbol;Acc:HGNC:24526]	ENSMMUT00000008108	1181	1450	+
ENSMMUG00000002060	KIZ	kizuna centrosomal protein [Source:HGNC Symbol;Acc:HGNC:15865]	ENSMMUT00000044385	701	910	+
ENSMMUG00000011405	XRN2	5'-3' exoribonuclease 2 [Source:HGNC Symbol;Acc:HGNC:12836]	ENSMMUT00000015973	1221	1340	+
ENSMMUG00000007145	GGPS1	Geranylgeranyl pyrophosphate synthase; Uncharacterized protein [Source:UniProtKB/TrEMBL;Acc:F7DMS6]	ENSMMUT00000044383	561	810	+
ENSMMUG00000007141	ARID4B	Uncharacterized protein [Source:UniProtKB/TrEMBL;Acc:F7DMU1]	ENSMMUT00000009969	2441	2620	+
ENSMMUG00000031139		Peptidyl-prolyl cis-trans isomerase [Source:UniProtKB/TrEMBL;Acc:F6RNM6]	ENSMMUT00000006482	350	493	+
ENSMMUG00000022386	NXT1	NTF2-related export protein 1; Protein p15; Uncharacterized protein [Source:UniProtKB/TrEMBL;Acc:F6YYV6]	ENSMMUT00000031485	681	900	+
ENSMMUG00000022387	GZF1	GDNF-inducible zinc finger protein 1 [Source:HGNC Symbol;Acc:HGNC:15808]	ENSMMUT00000031486	1931	2449	+
ENSMMUG00000023358	ATG16L1	Uncharacterized protein [Source:UniProtKB/TrEMBL;Acc:F7E8C5]	ENSMMUT00000032865	581	830	+
ENSMMUG00000022388	NAPB	N-ethylmaleimide-sensitive factor attachment protein, beta [Source:HGNC Symbol;Acc:HGNC:15751]	ENSMMUT00000031490	9	170	+
ENSMMUG00000020354	SLC3A2	Uncharacterized protein [Source:UniProtKB/TrEMBL;Acc:F6RUW5]	ENSMMUT00000028625	362	617	+
ENSMMUG00000018779	WDR74	WD repeat domain 74 [Source:HGNC Symbol;Acc:HGNC:25529]	ENSMMUT00000026407	1151	1290	+
ENSMMUG00000020597	ACSS1	acyl-CoA synthetase short-chain family member 1 [Source:HGNC Symbol;Acc:HGNC:16091]	ENSMMUT00000028978	3351	3620	+
ENSMMUG00000005280	STX5	Syntaxin-5; Uncharacterized protein [Source:UniProtKB/TrEMBL;Acc:F7BHP2]	ENSMMUT00000007430	1641	1790	+
ENSMMUG00000021703	TARBP1	TAR (HIV-1) RNA binding protein 1 [Source:HGNC Symbol;Acc:HGNC:11568]	ENSMMUT00000030535	731	980	+
ENSMMUG00000011874	ENTPD6	ectonucleoside triphosphate diphosphohydrolase 6 (putative) [Source:HGNC Symbol;Acc:HGNC:3368]	ENSMMUT00000044373	1991	2160	+
ENSMMUG00000000188	NXF1	nuclear RNA export factor 1 [Source:HGNC Symbol;Acc:HGNC:8071]	ENSMMUT00000000280	1921	2130	+
ENSMMUG00000023094	TMEM223	transmembrane protein 223 [Source:HGNC Symbol;Acc:HGNC:28464]	ENSMMUT00000032490	481	750	+
ENSMMUG00000003682	TMEM179B	Transmembrane protein 179B; Uncharacterized protein [Source:UniProtKB/TrEMBL;Acc:F6SNV8]	ENSMMUT00000005210	721	850	+
ENSMMUG00000000110	TAF6L	TAF6-like RNA polymerase II, p300/CBP-associated factor (PCAF)-associated factor, 65kDa [Source:HGNC Symbol;Acc:HGNC:17305]	ENSMMUT00000000159	1721	1850	+
ENSMMUG00000014368	POLR2G	DNA-directed RNA polymerase II subunit RPB7; Uncharacterized protein [Source:UniProtKB/TrEMBL;Acc:F7CM41]	ENSMMUT00000020163	431	590	+
ENSMMUG00000005646	DGKD	diacylglycerol kinase, delta 130kDa [Source:HGNC Symbol;Acc:HGNC:2851]	ENSMMUT00000007941	2201	2370	+
ENSMMUG00000014367	TTC9C	tetratricopeptide repeat domain 9C [Source:HGNC Symbol;Acc:HGNC:28432]	ENSMMUT00000020161	841	1010	+
ENSMMUG00000014363	BSCL2	Uncharacterized protein [Source:UniProtKB/TrEMBL;Acc:F6RV88]	ENSMMUT00000020160	351	570	+
ENSMMUG00000012614	NTPCR	Uncharacterized protein [Source:UniProtKB/TrEMBL;Acc:F6RV68]	ENSMMUT00000017686	611	757	+
ENSMMUG00000009201	ABHD12	Uncharacterized protein [Source:UniProtKB/TrEMBL;Acc:F6RVA3]	ENSMMUT00000044365	1291	1900	+
ENSMMUG00000005761	UBXN1	UBX domain-containing protein 1; Uncharacterized protein [Source:UniProtKB/TrEMBL;Acc:F6W1J6]	ENSMMUT00000008090	421	720	+
ENSMMUG00000005247	EGLN1	Uncharacterized protein [Source:UniProtKB/TrEMBL;Acc:F7BR52]	ENSMMUT00000007389	1241	1480	+
ENSMMUG00000013949		Uncharacterized protein [Source:UniProtKB/TrEMBL;Acc:F6SE34]	ENSMMUT00000019580	381	480	+
ENSMMUG00000013951	INTS5	Uncharacterized protein [Source:UniProtKB/TrEMBL;Acc:F6SE14]	ENSMMUT00000019582	2001	2310	+
ENSMMUG00000018117	GANAB	Neutral alpha-glucosidase AB isoform 2; Uncharacterized protein [Source:UniProtKB/TrEMBL;Acc:F6RVK6]	ENSMMUT00000044356	2981	3420	+
ENSMMUG00000005801	GNPAT	Uncharacterized protein [Source:UniProtKB/TrEMBL;Acc:F6RVY3]	ENSMMUT00000008135	2081	2422	+
ENSMMUG00000021221	HJURP	Holliday junction recognition protein [Source:HGNC Symbol;Acc:HGNC:25444]	ENSMMUT00000029861	891	1090	+
ENSMMUG00000031126	B3GAT3	beta-1,3-glucuronyltransferase 3 (glucuronosyltransferase I) [Source:HGNC Symbol;Acc:HGNC:923]	ENSMMUT00000044350	871	980	+
ENSMMUG00000018112	EML3	echinoderm microtubule associated protein like 3 [Source:HGNC Symbol;Acc:HGNC:26666]	ENSMMUT00000025443	2641	2930	+
ENSMMUG00000011516	ARL4C	Uncharacterized protein [Source:UniProtKB/TrEMBL;Acc:F7C5U3]	ENSMMUT00000016123	971	1256	+
ENSMMUG00000018110	MTA2	Metastasis-associated 1-like 1; Metastasis-associated protein MTA2; Uncharacterized protein [Source:UniProtKB/TrEMBL;Acc:F7EC89]	ENSMMUT00000025438	2741	2840	+
ENSMMUG00000011569		Uncharacterized protein [Source:UniProtKB/TrEMBL;Acc:F7BLH6]	ENSMMUT00000016210	1	140	+
ENSMMUG00000008191	FAM89A	family with sequence similarity 89, member A [Source:HGNC Symbol;Acc:HGNC:25057]	ENSMMUT00000011446	401	780	+
ENSMMUG00000005892	ARV1	ARV1 homolog (S. cerevisiae) [Source:HGNC Symbol;Acc:HGNC:29561]	ENSMMUT00000044343	881	1224	+
ENSMMUG00000006598	EEF1G	eukaryotic translation elongation factor 1 gamma [Source:HGNC Symbol;Acc:HGNC:3213]	ENSMMUT00000009232	1331	1450	+
ENSMMUG00000010793	CXCR7	C-X-C chemokine receptor type 7; Uncharacterized protein [Source:UniProtKB/TrEMBL;Acc:F7GTL4]	ENSMMUT00000015082	1321	1469	+
ENSMMUG00000021605	COPS8	Uncharacterized protein [Source:UniProtKB/TrEMBL;Acc:F7E470]	ENSMMUT00000030411	911	1140	+
ENSMMUG00000022222	IL17RA	Uncharacterized protein [Source:UniProtKB/TrEMBL;Acc:F6S2R4]	ENSMMUT00000044342	2131	2310	+
ENSMMUG00000021477	ATP6V1E1	ATPase, H+ transporting, lysosomal 31kDa, V1 subunit E1 [Source:HGNC Symbol;Acc:HGNC:857]	ENSMMUT00000044322	66	410	+
ENSMMUG00000018482	UBE2F	NEDD8-conjugating enzyme UBE2F isoform 1; Uncharacterized protein [Source:UniProtKB/TrEMBL;Acc:F6X242]	ENSMMUT00000025988	591	740	+
ENSMMUG00000005877	COG2	component of oligomeric golgi complex 2 [Source:HGNC Symbol;Acc:HGNC:6546]	ENSMMUT00000008227	2281	2420	+
ENSMMUG00000020801		Uncharacterized protein [Source:UniProtKB/TrEMBL;Acc:F7H9R5]	ENSMMUT00000029266	871	1090	+
ENSMMUG00000018483	SCLY	selenocysteine lyase [Source:HGNC Symbol;Acc:HGNC:18161]	ENSMMUT00000044312	10	160	+
ENSMMUG00000014140	PEX26	Uncharacterized protein [Source:UniProtKB/TrEMBL;Acc:F6SAA0]	ENSMMUT00000044309	1261	1580	+
ENSMMUG00000002285	GALNT2	Polypeptide N-acetylgalactosaminyltransferase 2; Uncharacterized protein [Source:UniProtKB/TrEMBL;Acc:F7B3H7]	ENSMMUT00000003236	1701	2130	+
ENSMMUG00000009509	URB2	Uncharacterized protein [Source:UniProtKB/TrEMBL;Acc:F6YMV8]	ENSMMUT00000013269	4501	4678	+
ENSMMUG00000018908	ILKAP	Uncharacterized protein [Source:UniProtKB/TrEMBL;Acc:F6ZZW8]	ENSMMUT00000026584	1251	1425	+
ENSMMUG00000009508	TAF5L	TAF5-like RNA polymerase II p300/CBP-associated factor-associated factor 65 kDa subunit 5L isoform a; Uncharacterized protein [Source:UniProtKB/TrEMBL;Acc:F6YMW6]	ENSMMUT00000013268	1171	1370	+
ENSMMUG00000022094	ABCB10	ATP-binding cassette, sub-family B (MDR/TAP), member 10 [Source:HGNC Symbol;Acc:HGNC:41]	ENSMMUT00000031081	3481	3580	+
ENSMMUG00000003272		Uncharacterized protein [Source:UniProtKB/TrEMBL;Acc:F7FKN6]	ENSMMUT00000004628	1	141	+
ENSMMUG00000019925	DGCR2	DiGeorge syndrome critical region gene 2 [Source:HGNC Symbol;Acc:HGNC:2845]	ENSMMUT00000027987	1401	1570	+
ENSMMUG00000022091	NUP133	nucleoporin 133kDa [Source:HGNC Symbol;Acc:HGNC:18016]	ENSMMUT00000031079	3001	3280	+
ENSMMUG00000006655	MYRF	myelin regulatory factor [Source:HGNC Symbol;Acc:HGNC:1181]	ENSMMUT00000044299	3881	4070	+
ENSMMUG00000005431	SLC25A1	Tricarboxylate transport protein, mitochondrial; Uncharacterized protein [Source:UniProtKB/TrEMBL;Acc:F7GRH3]	ENSMMUT00000007641	1511	1610	+
[truncated: 3,144 more rows]
