# Supplementary material for: Evolution of transcript modification by N6-methyladenosine in primates
Source: HighWire-hosted journal article supplement (doi:10.1101/gr.212563.116), 2017-01-04
Supplement: Supplemental_Table_S7.xlsx [file Supplemental_Table_S7.xlsx]

## Sheet: sTable7.R2Peaks
GID	Symbol	Description	RefSeq_NM	Start	End	Strand
ENSMMUG00000003485	RNMT	RNA (guanine-7-) methyltransferase [Source:HGNC Symbol;Acc:HGNC:10075]	ENSMMUT00000004935	1591	1730	+
ENSMMUG00000002512	CEP192	centrosomal protein 192kDa [Source:HGNC Symbol;Acc:HGNC:25515]	ENSMMUT00000048301	1821	1970	+
ENSMMUG00000006800	SEH1L	SEH1-like (S. cerevisiae) [Source:HGNC Symbol;Acc:HGNC:30379]	ENSMMUT00000009510	1231	1370	+
ENSMMUG00000021992		Uncharacterized protein [Source:UniProtKB/TrEMBL;Acc:F6RJX6]	ENSMMUT00000030945	751	986	+
ENSMMUG00000021855		Uncharacterized protein [Source:UniProtKB/TrEMBL;Acc:F7EHZ2]	ENSMMUT00000030750	391	630	+
ENSMMUG00000021125	AFG3L2	AFG3-like AAA ATPase 2 [Source:HGNC Symbol;Acc:HGNC:315]	ENSMMUT00000029712	2611	2955	+
ENSMMUG00000011467	MPPE1	metallophosphoesterase 1 [Source:HGNC Symbol;Acc:HGNC:15988]	ENSMMUT00000016057	1511	1720	+
ENSMMUG00000010471	IMPA2	Uncharacterized protein [Source:UniProtKB/TrEMBL;Acc:F7BN86]	ENSMMUT00000048294	1071	1170	+
ENSMMUG00000000682	NAPG	Gamma-soluble NSF attachment protein; Uncharacterized protein [Source:UniProtKB/TrEMBL;Acc:F6Z0B6]	ENSMMUT00000048292	671	840	+
ENSMMUG00000015014	VAPA	Uncharacterized protein [Source:UniProtKB/TrEMBL;Acc:F6V5Z9]	ENSMMUT00000021047	991	1090	+
ENSMMUG00000019525	PPP4R1	protein phosphatase 4, regulatory subunit 1 [Source:HGNC Symbol;Acc:HGNC:9320]	ENSMMUT00000027427	3221	3380	+
ENSMMUG00000019521	RALBP1	Uncharacterized protein [Source:UniProtKB/TrEMBL;Acc:F7CX44]	ENSMMUT00000027425	331	500	+
ENSMMUG00000010726	TWSG1	Twisted gastrulation protein homolog 1; Twisted gastrulation protein-like protein 1; Uncharacterized protein [Source:UniProtKB/TrEMBL;Acc:F7G4Z4]	ENSMMUT00000015000	1582	1833	+
ENSMMUG00000022097	ANKRD12	Uncharacterized protein [Source:UniProtKB/TrEMBL;Acc:F7D913]	ENSMMUT00000048290	2671	2770	+
ENSMMUG00000022095	NDUFV2	Uncharacterized protein [Source:UniProtKB/TrEMBL;Acc:F7D928]	ENSMMUT00000031082	721	830	+
ENSMMUG00000021463		Uncharacterized protein [Source:UniProtKB/TrEMBL;Acc:F7E6B4]	ENSMMUT00000030214	1	100	+
ENSMMUG00000022005	ZFP161	Uncharacterized protein; Zinc finger protein 161 homolog [Source:UniProtKB/TrEMBL;Acc:F6RIC1]	ENSMMUT00000030966	1291	1630	+
ENSMMUG00000005086	TGIF1	Uncharacterized protein [Source:UniProtKB/TrEMBL;Acc:F7AEU1]	ENSMMUT00000048280	1631	1770	+
ENSMMUG00000017548	LPIN2	Phosphatidate phosphatase LPIN2; Uncharacterized protein [Source:UniProtKB/TrEMBL;Acc:F6TH75]	ENSMMUT00000024681	631	780	+
ENSMMUG00000005461		Uncharacterized protein [Source:UniProtKB/TrEMBL;Acc:F7AEY8]	ENSMMUT00000007689	3622	4093	+
ENSMMUG00000004046	TYMS	Thymidylate synthase [Source:UniProtKB/TrEMBL;Acc:F6ZR67]	ENSMMUT00000005744	1251	1350	+
ENSMMUG00000004662	THOC1	Uncharacterized protein [Source:UniProtKB/TrEMBL;Acc:F6T5R2]	ENSMMUT00000006590	1781	1890	+
ENSMMUG00000004660	USP14	Ubiquitin carboxyl-terminal hydrolase [Source:UniProtKB/TrEMBL;Acc:F6T5R9]	ENSMMUT00000048273	50	432	+
ENSMMUG00000004656	ROCK1	Rho-associated, coiled-coil containing protein kinase 1 [Source:HGNC Symbol;Acc:HGNC:10251]	ENSMMUT00000006584	2631	2850	+
ENSMMUG00000012987	ESCO1	establishment of sister chromatid cohesion N-acetyltransferase 1 [Source:HGNC Symbol;Acc:HGNC:24645]	ENSMMUT00000011617	3751	3891	+
ENSMMUG00000004382	ABHD3	abhydrolase domain containing 3 [Source:HGNC Symbol;Acc:HGNC:18718]	ENSMMUT00000006223	1251	1491	+
ENSMMUG00000010227	MIB1	Uncharacterized protein [Source:UniProtKB/TrEMBL;Acc:F6S3M0]	ENSMMUT00000014297	1	240	+
ENSMMUG00000021480	C18orf8	chromosome 18 open reading frame 8 [Source:HGNC Symbol;Acc:HGNC:24326]	ENSMMUT00000030239	1311	1480	+
ENSMMUG00000021484	NPC1	Niemann-Pick disease, type C1 [Source:HGNC Symbol;Acc:HGNC:7897]	ENSMMUT00000030245	3741	4241	+
ENSMMUG00000004343	TTC39C	Uncharacterized protein [Source:UniProtKB/TrEMBL;Acc:F6XMC4]	ENSMMUT00000006168	1871	1980	+
ENSMMUG00000004664	IMPACT	Protein IMPACT; Uncharacterized protein [Source:UniProtKB/TrEMBL;Acc:F6RUS8]	ENSMMUT00000006591	841	1000	+
ENSMMUG00000018059	SS18	Protein SSXT isoform 1; Uncharacterized protein [Source:UniProtKB/TrEMBL;Acc:F7EQE4]	ENSMMUT00000025371	1251	1400	+
ENSMMUG00000032555	PPIA	Peptidyl-prolyl cis-trans isomerase [Source:UniProtKB/TrEMBL;Acc:F7CF53]	ENSMMUT00000048255	350	490	+
ENSMMUG00000018006	TRAPPC8	trafficking protein particle complex 8 [Source:HGNC Symbol;Acc:HGNC:29169]	ENSMMUT00000025301	3011	3228	+
ENSMMUG00000012849	RNF138	Uncharacterized protein [Source:UniProtKB/TrEMBL;Acc:F6T5A6]	ENSMMUT00000018026	342	690	+
ENSMMUG00000017662	MAPRE2	APC-binding protein EB2; Microtubule-associated protein RP/EB family member 2 isoform 1; Uncharacterized protein [Source:UniProtKB/TrEMBL;Acc:F6UH42]	ENSMMUT00000024831	1161	1340	+
ENSMMUG00000009320		Uncharacterized protein [Source:UniProtKB/TrEMBL;Acc:F7CFC6]	ENSMMUT00000013026	1	270	+
ENSMMUG00000000457	GALNT1	Polypeptide N-acetylgalactosaminyltransferase 1; Uncharacterized protein [Source:UniProtKB/TrEMBL;Acc:F6YR98]	ENSMMUT00000000670	1511	1690	+
ENSMMUG00000018777	RPRD1A	Uncharacterized protein [Source:UniProtKB/TrEMBL;Acc:F6ZTW1]	ENSMMUT00000026403	781	953	+
ENSMMUG00000007514	ZBED1	DREF-like protein; Uncharacterized protein; Zinc finger BED domain-containing protein 1 [Source:UniProtKB/TrEMBL;Acc:F6QDB5]	ENSMMUT00000010509	2431	2640	+
ENSMMUG00000018784	SLC39A6	solute carrier family 39 (zinc transporter), member 6 [Source:HGNC Symbol;Acc:HGNC:18607]	ENSMMUT00000026411	1231	1400	+
ENSMMUG00000018785	ELP2	elongator acetyltransferase complex subunit 2 [Source:HGNC Symbol;Acc:HGNC:18248]	ENSMMUT00000026419	2281	2520	+
ENSMMUG00000018791	MOCOS	molybdenum cofactor sulfurase [Source:HGNC Symbol;Acc:HGNC:18234]	ENSMMUT00000026425	471	690	+
ENSMMUG00000032541		Peptidyl-prolyl cis-trans isomerase [Source:UniProtKB/TrEMBL;Acc:F7CFS5]	ENSMMUT00000048219	381	490	+
ENSMMUG00000014553	PIK3C3	phosphatidylinositol 3-kinase, catalytic subunit type 3 [Source:HGNC Symbol;Acc:HGNC:8974]	ENSMMUT00000020418	1671	1830	+
ENSMMUG00000006191	TBL1Y	F-box-like/WD repeat-containing protein TBL1Y [Source:RefSeq peptide;Acc:NP_001138540]	ENSMMUT00000008662	1271	1420	+
ENSMMUG00000008503			ENSMMUT00000011883	702	1180	+
ENSMMUG00000016290	WWC3	WWC family member 3 [Source:HGNC Symbol;Acc:HGNC:29237]	ENSMMUT00000048208	2404	2534	+
ENSMMUG00000003570	ATP5A1	ATP synthase subunit alpha [Source:UniProtKB/TrEMBL;Acc:F7ETD0]	ENSMMUT00000005045	381	540	+
ENSMMUG00000013993	HCCS	holocytochrome c synthase [Source:HGNC Symbol;Acc:HGNC:4837]	ENSMMUT00000019640	921	1090	+
ENSMMUG00000011473	C18H18ORF25	Uncharacterized protein; Uncharacterized protein C18orf25 isoform b [Source:UniProtKB/TrEMBL;Acc:F7AEY1]	ENSMMUT00000016064	81	210	+
ENSMMUG00000002689	MSL3	male-specific lethal 3 homolog (Drosophila) [Source:HGNC Symbol;Acc:HGNC:7370]	ENSMMUT00000003831	104	470	+
ENSMMUG00000004498	PIAS2	Uncharacterized protein [Source:UniProtKB/TrEMBL;Acc:F6SJC1]	ENSMMUT00000006377	1711	1840	+
ENSMMUG00000010999	HDHD2	haloacid dehalogenase-like hydrolase domain containing 2 [Source:HGNC Symbol;Acc:HGNC:25364]	ENSMMUT00000015379	981	1230	+
ENSMMUG00000007816	SMAD2	Mothers against decapentaplegic homolog 2 isoform 2; Uncharacterized protein [Source:UniProtKB/TrEMBL;Acc:F7CIW0]	ENSMMUT00000010947	1351	1650	+
ENSMMUG00000019410	OFD1	oral-facial-digital syndrome 1 [Source:HGNC Symbol;Acc:HGNC:2567]	ENSMMUT00000048188	3041	3150	+
ENSMMUG00000001760	DYM	dymeclin [Source:HGNC Symbol;Acc:HGNC:21317]	ENSMMUT00000002484	2124	2250	+
ENSMMUG00000018837			ENSMMUT00000026483	410	525	+
ENSMMUG00000013595	GEMIN8	Gem-associated protein 8; Uncharacterized protein [Source:UniProtKB/TrEMBL;Acc:F7CL46]	ENSMMUT00000019083	571	860	+
ENSMMUG00000017842	MOSPD2	motile sperm domain containing 2 [Source:HGNC Symbol;Acc:HGNC:28381]	ENSMMUT00000025075	1651	1872	+
ENSMMUG00000009050	MBD1	Uncharacterized protein [Source:UniProtKB/TrEMBL;Acc:F7CL60]	ENSMMUT00000012652	1591	1810	+
ENSMMUG00000015737	PIGA	Uncharacterized protein [Source:UniProtKB/TrEMBL;Acc:F6S6W8]	ENSMMUT00000022092	1151	1553	+
ENSMMUG00000009051	CXXC1	CpG-binding protein isoform 2; Uncharacterized protein [Source:UniProtKB/TrEMBL;Acc:F7FBL1]	ENSMMUT00000012656	1641	1843	+
ENSMMUG00000022001	ME2	malic enzyme 2, NAD(+)-dependent, mitochondrial [Source:HGNC Symbol;Acc:HGNC:6984]	ENSMMUT00000030960	911	1130	+
ENSMMUG00000018334	SMAD4	Mothers against decapentaplegic homolog 4; Mothers against decapentaplegic-like protein 4; Uncharacterized protein [Source:UniProtKB/TrEMBL;Acc:F7H894]	ENSMMUT00000025767	771	960	+
ENSMMUG00000023652	MEX3C	mex-3 RNA binding family member C [Source:HGNC Symbol;Acc:HGNC:28040]	ENSMMUT00000033272	1501	1630	+
ENSMMUG00000010157		Uncharacterized protein [Source:UniProtKB/TrEMBL;Acc:F7CL83]	ENSMMUT00000014183	1	120	+
ENSMMUG00000003136	MBD2	Uncharacterized protein [Source:UniProtKB/TrEMBL;Acc:F7CL90]	ENSMMUT00000004444	596	740	+
ENSMMUG00000016238	RBBP7	Uncharacterized protein [Source:UniProtKB/TrEMBL;Acc:F7CLE6]	ENSMMUT00000022818	305	430	+
ENSMMUG00000012001	TCF4	transcription factor 4 [Source:HGNC Symbol;Acc:HGNC:11634]	ENSMMUT00000048171	2201	2390	+
ENSMMUG00000012916	WDR7	WD repeat domain 7 [Source:HGNC Symbol;Acc:HGNC:13490]	ENSMMUT00000018117	6671	6803	+
ENSMMUG00000022568	FECH	ferrochelatase [Source:HGNC Symbol;Acc:HGNC:3647]	ENSMMUT00000031752	1381	1620	+
ENSMMUG00000019974	NARS	asparaginyl-tRNA synthetase [Source:HGNC Symbol;Acc:HGNC:7643]	ENSMMUT00000048160	1531	1766	+
ENSMMUG00000006616	NEDD4L	neural precursor cell expressed, developmentally down-regulated 4-like, E3 ubiquitin protein ligase [Source:HGNC Symbol;Acc:HGNC:7728]	ENSMMUT00000009279	2781	3099	+
ENSMMUG00000020513	PHKA2	Uncharacterized protein [Source:UniProtKB/TrEMBL;Acc:F7AXU3]	ENSMMUT00000028871	3921	4370	+
ENSMMUG00000006635	ALPK2	alpha-kinase 2 [Source:HGNC Symbol;Acc:HGNC:20565]	ENSMMUT00000009287	4881	5030	+
ENSMMUG00000014235	MALT1	Uncharacterized protein [Source:UniProtKB/TrEMBL;Acc:F7D797]	ENSMMUT00000019975	2211	2740	+
ENSMMUG00000012622	PMAIP1	Phorbol-12-myristate-13-acetate-induced protein 1; Uncharacterized protein [Source:UniProtKB/TrEMBL;Acc:F7F0V0]	ENSMMUT00000017701	251	601	+
ENSMMUG00000002204	PIGN	phosphatidylinositol glycan anchor biosynthesis, class N [Source:HGNC Symbol;Acc:HGNC:8967]	ENSMMUT00000003122	2671	2790	+
ENSMMUG00000002209	KIAA1468	KIAA1468 [Source:HGNC Symbol;Acc:HGNC:29289]	ENSMMUT00000003126	3711	3810	+
ENSMMUG00000004434	ZCCHC2	zinc finger, CCHC domain containing 2 [Source:HGNC Symbol;Acc:HGNC:22916]	ENSMMUT00000006285	1951	2720	+
ENSMMUG00000004744	SH3KBP1	SH3-domain kinase binding protein 1 [Source:HGNC Symbol;Acc:HGNC:13867]	ENSMMUT00000006705	2191	2308	+
ENSMMUG00000006578	KDSR	3-ketodihydrosphingosine reductase; Uncharacterized protein [Source:UniProtKB/TrEMBL;Acc:F7HPT5]	ENSMMUT00000009209	1094	1360	+
ENSMMUG00000021184	VPS4B	Suppressor of K(+) transport growth defect 1; Uncharacterized protein; Vacuolar protein sorting-associated protein 4B [Source:UniProtKB/TrEMBL;Acc:F7H6D5]	ENSMMUT00000029805	341	660	+
ENSMMUG00000002134	RPS6KA3	ribosomal protein S6 kinase, 90kDa, polypeptide 3 [Source:HGNC Symbol;Acc:HGNC:10432]	ENSMMUT00000003012	2121	2533	+
ENSMMUG00000020392	SMS	Uncharacterized protein [Source:UniProtKB/TrEMBL;Acc:F6U8Z4]	ENSMMUT00000028677	571	710	+
ENSMMUG00000017728	TMX3	Protein disulfide-isomerase TMX3; Uncharacterized protein [Source:UniProtKB/TrEMBL;Acc:F7F8A3]	ENSMMUT00000024918	1841	1960	+
ENSMMUG00000018824	ACOT9	acyl-CoA thioesterase 9 [Source:HGNC Symbol;Acc:HGNC:17152]	ENSMMUT00000026466	1361	1534	+
ENSMMUG00000008335	SAT1	Uncharacterized protein [Source:UniProtKB/TrEMBL;Acc:F7HS12]	ENSMMUT00000011656	71	200	+
ENSMMUG00000009241	CD226	Macaca mulatta CD226 molecule (CD226), mRNA. [Source:RefSeq mRNA;Acc:NM_001042643]	ENSMMUT00000012914	901	1000	+
ENSMMUG00000013850	KLHL15	Kelch-like protein 15; Uncharacterized protein [Source:UniProtKB/TrEMBL;Acc:F6RME8]	ENSMMUT00000019437	1751	1940	+
ENSMMUG00000006979	EIF2S3	Uncharacterized protein [Source:UniProtKB/TrEMBL;Acc:F7DQV0]	ENSMMUT00000009753	2071	2220	+
ENSMMUG00000032499		L-lactate dehydrogenase [Source:UniProtKB/TrEMBL;Acc:F7BCH4]	ENSMMUT00000048116	701	800	+
ENSMMUG00000012819	PDK3	pyruvate dehydrogenase kinase, isozyme 3 [Source:HGNC Symbol;Acc:HGNC:8811]	ENSMMUT00000017985	1091	1210	+
ENSMMUG00000023299	C18ORF55	TIM21-like protein, mitochondrial; Uncharacterized protein [Source:UniProtKB/TrEMBL;Acc:F7FB39]	ENSMMUT00000032779	421	630	+
ENSMMUG00000018433	POLA1	DNA polymerase [Source:UniProtKB/TrEMBL;Acc:F7HF26]	ENSMMUT00000025916	3731	3830	+
ENSMMUG00000017408	ZNF516	Uncharacterized protein [Source:UniProtKB/TrEMBL;Acc:F7HRX0]	ENSMMUT00000024485	1461	1680	+
ENSMMUG00000005959	GK	glycerol kinase [Source:HGNC Symbol;Acc:HGNC:4289]	ENSMMUT00000008342	1	260	+
ENSMMUG00000009151	CTDP1	CTD (carboxy-terminal domain, RNA polymerase II, polypeptide A) phosphatase, subunit 1 [Source:HGNC Symbol;Acc:HGNC:2498]	ENSMMUT00000012797	2651	2770	+
ENSMMUG00000001612	PQLC1	Uncharacterized protein [Source:UniProtKB/TrEMBL;Acc:F7GUX7]	ENSMMUT00000002275	1	130	+
ENSMMUG00000001613	TXNL4A	Thioredoxin-like protein 4A; Uncharacterized protein [Source:UniProtKB/TrEMBL;Acc:F7GUX1]	ENSMMUT00000002279	481	810	+
ENSMMUG00000014855	RBFA	ribosome binding factor A (putative) [Source:HGNC Symbol;Acc:HGNC:26120]	ENSMMUT00000020843	661	1030	+
ENSMMUG00000013710	ADNP2	ADNP homeobox protein 2; Uncharacterized protein; Zinc finger protein 508 [Source:UniProtKB/TrEMBL;Acc:F6S545]	ENSMMUT00000019249	2761	2940	+
ENSMMUG00000013220	CYBB	Cytochrome b-245 heavy chain; Uncharacterized protein [Source:UniProtKB/TrEMBL;Acc:F6X7S5]	ENSMMUT00000018545	3167	3389	+
ENSMMUG00000003201	MID1IP1	Gastrulation-specific G12-like protein; Mid1-interacting protein 1; Uncharacterized protein [Source:UniProtKB/TrEMBL;Acc:F7BK64]	ENSMMUT00000048087	1181	1300	+
ENSMMUG00000012762	ATP6AP2	Renin receptor; Renin/prorenin receptor; Uncharacterized protein [Source:UniProtKB/TrEMBL;Acc:F7EMR9]	ENSMMUT00000017907	1111	1295	+
ENSMMUG00000005263	CXorf38	chromosome X open reading frame 38 [Source:HGNC Symbol;Acc:HGNC:28589]	ENSMMUT00000007407	591	930	+
ENSMMUG00000005264	MED14	Uncharacterized protein [Source:UniProtKB/TrEMBL;Acc:F7BPL6]	ENSMMUT00000007409	4451	4653	+
ENSMMUG00000013753	USP9X	Ubiquitin carboxyl-terminal hydrolase [Source:UniProtKB/TrEMBL;Acc:F6RFN9]	ENSMMUT00000019313	7511	7900	+
ENSMMUG00000032474		Uncharacterized protein [Source:UniProtKB/TrEMBL;Acc:F7BRA6]	ENSMMUT00000048076	1232	1370	+
ENSMMUG00000003505		Uncharacterized protein [Source:UniProtKB/TrEMBL;Acc:F7E3C0]	ENSMMUT00000004958	301	460	+
ENSMMUG00000003317	KDM6A	lysine (K)-specific demethylase 6A [Source:HGNC Symbol;Acc:HGNC:12637]	ENSMMUT00000004692	4571	4760	+
ENSMMUG00000003897	SLC9A7	Sodium/hydrogen exchanger [Source:UniProtKB/TrEMBL;Acc:F7H3I0]	ENSMMUT00000005520	1261	1500	+
ENSMMUG00000023018	RP2	retinitis pigmentosa 2 (X-linked recessive) [Source:HGNC Symbol;Acc:HGNC:10274]	ENSMMUT00000032389	21	320	+
ENSMMUG00000023016	JADE3	jade family PHD finger 3 [Source:HGNC Symbol;Acc:HGNC:22982]	ENSMMUT00000032388	2431	2810	+
ENSMMUG00000017423	RBM10	Uncharacterized protein [Source:UniProtKB/TrEMBL;Acc:F7BRT1]	ENSMMUT00000024508	2881	2980	+
ENSMMUG00000017428	UBA1	ubiquitin-like modifier activating enzyme 1 [Source:HGNC Symbol;Acc:HGNC:12469]	ENSMMUT00000048061	3261	3410	+
ENSMMUG00000016608	USP11	Ubiquitin carboxyl-terminal hydrolase [Source:UniProtKB/TrEMBL;Acc:F6TXQ2]	ENSMMUT00000023336	131	270	+
ENSMMUG00000011418	ARAF	v-raf murine sarcoma 3611 viral oncogene homolog [Source:HGNC Symbol;Acc:HGNC:646]	ENSMMUT00000015986	771	1000	+
ENSMMUG00000011426	TIMP1	Macaca mulatta TIMP metallopeptidase inhibitor 1 (TIMP1), mRNA. [Source:RefSeq mRNA;Acc:NM_001032939]	ENSMMUT00000015998	761	890	+
ENSMMUG00000032465	CFP	complement factor properdin [Source:HGNC Symbol;Acc:HGNC:8864]	ENSMMUT00000048055	1281	1390	+
ENSMMUG00000019420	ELK1	ELK1, member of ETS oncogene family [Source:HGNC Symbol;Acc:HGNC:3321]	ENSMMUT00000027292	1511	1740	+
ENSMMUG00000018535	UXT	Uncharacterized protein [Source:UniProtKB/TrEMBL;Acc:F7A1Y5]	ENSMMUT00000026060	201	330	+
ENSMMUG00000016975	SLC38A5	solute carrier family 38, member 5 [Source:HGNC Symbol;Acc:HGNC:18070]	ENSMMUT00000023855	1251	1800	+
ENSMMUG00000018894	FTSJ1	Putative ribosomal RNA methyltransferase 1 isoform b; Uncharacterized protein [Source:UniProtKB/TrEMBL;Acc:F7A6V3]	ENSMMUT00000026559	1191	1603	+
ENSMMUG00000018336	EBP	Uncharacterized protein [Source:UniProtKB/TrEMBL;Acc:F7H890]	ENSMMUT00000025769	251	390	+
ENSMMUG00000018335	TBC1D25	Uncharacterized protein [Source:UniProtKB/TrEMBL;Acc:F7CH11]	ENSMMUT00000025768	1291	1520	+
ENSMMUG00000004439		Uncharacterized protein [Source:UniProtKB/TrEMBL;Acc:F7EEK9]	ENSMMUT00000006295	1651	1840	+
ENSMMUG00000015396	WDR13	WD repeat domain 13 [Source:HGNC Symbol;Acc:HGNC:14352]	ENSMMUT00000021585	100	249	+
ENSMMUG00000019768	SUV39H1	Histone-lysine N-methyltransferase SUV39H1; Uncharacterized protein [Source:UniProtKB/TrEMBL;Acc:F6X1Z9]	ENSMMUT00000013170	2521	2720	+
ENSMMUG00000016465	HDAC6	Uncharacterized protein [Source:UniProtKB/TrEMBL;Acc:F7GBE5]	ENSMMUT00000023129	3751	4100	+
ENSMMUG00000004547	TIMM17B	Mitochondrial import inner membrane translocase subunit Tim17-B; Mitochondrial import inner membrane translocase subunit Tim17-B isoform 2; Uncharacterized protein [Source:UniProtKB/TrEMBL;Acc:F6S5R4]	ENSMMUT00000006430	821	940	+
ENSMMUG00000004548	PQBP1	Polyglutamine-binding protein 1; Polyglutamine-binding protein 1 isoform 1; Uncharacterized protein [Source:UniProtKB/TrEMBL;Acc:F6S5L8]	ENSMMUT00000006434	281	589	+
ENSMMUG00000004557	PIM2	Serine/threonine-protein kinase pim-2; Uncharacterized protein [Source:UniProtKB/TrEMBL;Acc:F6S4X1]	ENSMMUT00000006443	1941	2040	+
ENSMMUG00000004558	OTUD5	Uncharacterized protein [Source:UniProtKB/TrEMBL;Acc:F6S4V1]	ENSMMUT00000006444	1681	1800	+
ENSMMUG00000020059	GRIPAP1	GRIP1 associated protein 1 [Source:HGNC Symbol;Acc:HGNC:18706]	ENSMMUT00000028205	251	440	+
ENSMMUG00000023494	TFE3	Transcription factor E3; Uncharacterized protein [Source:UniProtKB/TrEMBL;Acc:F7E2P9]	ENSMMUT00000033057	2051	2270	+
ENSMMUG00000010617	CCDC120	Uncharacterized protein [Source:UniProtKB/TrEMBL;Acc:F7BKM2]	ENSMMUT00000014853	1281	1410	+
ENSMMUG00000010620	WDR45	Uncharacterized protein [Source:UniProtKB/TrEMBL;Acc:F7BK22]	ENSMMUT00000048038	1499	1730	+
ENSMMUG00000023022	PLP2	Intestinal membrane A4 protein; Proteolipid protein 2; Uncharacterized protein [Source:UniProtKB/TrEMBL;Acc:F6VM49]	ENSMMUT00000032395	811	927	+
ENSMMUG00000023024	PRICKLE3	prickle homolog 3 (Drosophila) [Source:HGNC Symbol;Acc:HGNC:6645]	ENSMMUT00000032398	1741	1970	+
ENSMMUG00000008618	CACNA1F	Uncharacterized protein [Source:UniProtKB/TrEMBL;Acc:F7CMS5]	ENSMMUT00000048033	5051	5170	+
ENSMMUG00000008623	CCDC22	Coiled-coil domain-containing protein 22; Uncharacterized protein [Source:UniProtKB/TrEMBL;Acc:F7FCZ3]	ENSMMUT00000012053	2121	2300	+
ENSMMUG00000021120	MAGED1	melanoma antigen family D, 1 [Source:HGNC Symbol;Acc:HGNC:6813]	ENSMMUT00000029705	501	670	+
ENSMMUG00000002593	TSPYL2	TSPY-like 2 [Source:HGNC Symbol;Acc:HGNC:24358]	ENSMMUT00000003693	1611	2050	+
ENSMMUG00000020553	KDM5C	Uncharacterized protein [Source:UniProtKB/TrEMBL;Acc:F7CUG7]	ENSMMUT00000028923	3781	3880	+
ENSMMUG00000009296	HSD17B10	Uncharacterized protein [Source:UniProtKB/TrEMBL;Acc:F7CV42]	ENSMMUT00000012994	14	150	+
ENSMMUG00000006362	HUWE1	HECT, UBA and WWE domain containing 1, E3 ubiquitin protein ligase [Source:HGNC Symbol;Acc:HGNC:30892]	ENSMMUT00000008929	13458	13810	+
ENSMMUG00000008751	PHF8	PHD finger protein 8 [Source:HGNC Symbol;Acc:HGNC:20672]	ENSMMUT00000012232	4381	4590	+
ENSMMUG00000008760	FAM120C	family with sequence similarity 120C [Source:HGNC Symbol;Acc:HGNC:16949]	ENSMMUT00000012240	535	733	+
ENSMMUG00000008231	GNL3L	guanine nucleotide binding protein-like 3 (nucleolar)-like [Source:HGNC Symbol;Acc:HGNC:25553]	ENSMMUT00000011504	261	410	+
ENSMMUG00000008422	TRO	Uncharacterized protein [Source:UniProtKB/TrEMBL;Acc:F6VBW8]	ENSMMUT00000011774	3403	3890	+
ENSMMUG00000008428	APEX2	DNA-(Apurinic or apyrimidinic site) lyase 2; Uncharacterized protein [Source:UniProtKB/TrEMBL;Acc:F6VBU4]	ENSMMUT00000011782	1201	1530	+
ENSMMUG00000002442		Uncharacterized protein [Source:UniProtKB/TrEMBL;Acc:F6PJ83]	ENSMMUT00000003482	701	800	+
ENSMMUG00000011534	MAGEH1	MAGE-H1 antigen; Melanoma-associated antigen H1; Uncharacterized protein [Source:UniProtKB/TrEMBL;Acc:F7BZI8]	ENSMMUT00000016157	741	950	+
ENSMMUG00000032446		Uncharacterized protein [Source:UniProtKB/TrEMBL;Acc:F7CZZ2]	ENSMMUT00000047996	489	650	+
ENSMMUG00000012836	UBQLN2	Protein linking IAP with cytoskeleton 2; Ubiquilin-2; Uncharacterized protein [Source:UniProtKB/TrEMBL;Acc:F6TBT9]	ENSMMUT00000018007	1511	1700	+
ENSMMUG00000009813			ENSMMUT00000013709	530	672	+
ENSMMUG00000016233	ARHGEF9	Uncharacterized protein [Source:UniProtKB/TrEMBL;Acc:F7GHA1]	ENSMMUT00000022809	1171	1290	+
ENSMMUG00000003922	LAS1L	LAS1-like (S. cerevisiae) [Source:HGNC Symbol;Acc:HGNC:25726]	ENSMMUT00000005558	1573	1870	+
ENSMMUG00000015653	MSN	Membrane-organizing extension spike protein; Uncharacterized protein [Source:UniProtKB/TrEMBL;Acc:F6RKW0]	ENSMMUT00000021958	881	1070	+
ENSMMUG00000015031	EDA2R	Uncharacterized protein [Source:UniProtKB/TrEMBL;Acc:F6TM24]	ENSMMUT00000021072	731	960	+
ENSMMUG00000016986	YIPF6	Yip1 domain family, member 6 [Source:HGNC Symbol;Acc:HGNC:28304]	ENSMMUT00000023870	1181	1290	+
ENSMMUG00000020965	EFNB1	EPH-related receptor tyrosine kinase ligand 2; Ephrin-B1; Uncharacterized protein [Source:UniProtKB/TrEMBL;Acc:F7H0J3]	ENSMMUT00000029484	1761	1940	+
ENSMMUG00000006416	FAM155B	family with sequence similarity 155, member B [Source:HGNC Symbol;Acc:HGNC:30701]	ENSMMUT00000008996	251	470	+
ENSMMUG00000013929			ENSMMUT00000047964	1531	1660	+
ENSMMUG00000013940	KIF4A	kinesin family member 4A [Source:HGNC Symbol;Acc:HGNC:13339]	ENSMMUT00000019565	2111	2230	+
ENSMMUG00000013948	DLG3	Uncharacterized protein [Source:UniProtKB/TrEMBL;Acc:F6SE42]	ENSMMUT00000047963	2639	2910	+
ENSMMUG00000017797	MED12	Uncharacterized protein [Source:UniProtKB/TrEMBL;Acc:F7E1A2]	ENSMMUT00000025014	6331	6540	+
ENSMMUG00000000667	ZMYM3	Uncharacterized protein; Zinc finger MYM-type protein 3 isoform 1 [Source:UniProtKB/TrEMBL;Acc:F6UBU8]	ENSMMUT00000000961	4611	4750	+
ENSMMUG00000020481	NONO	Non-POU domain-containing octamer-binding protein; Non-POU domain-containing octamer-binding protein isoform 1; Uncharacterized protein [Source:UniProtKB/TrEMBL;Acc:F6UC36]	ENSMMUT00000028825	1211	1330	+
ENSMMUG00000032425			ENSMMUT00000047947	781	1080	+
ENSMMUG00000015238	OGT	O-linked N-acetylglucosamine (GlcNAc) transferase [Source:HGNC Symbol;Acc:HGNC:8127]	ENSMMUT00000021361	2545	2790	+
ENSMMUG00000003295	RPS4Y2	40S ribosomal protein S4, Y isoform 2 [Source:RefSeq peptide;Acc:NP_001138538]	ENSMMUT00000031304	712	851	+
ENSMMUG00000007592	HDAC8	Uncharacterized protein [Source:UniProtKB/TrEMBL;Acc:F6SKJ5]	ENSMMUT00000047943	188	300	+
ENSMMUG00000007593	PHKA1	Phosphorylase b kinase regulatory subunit alpha, skeletal muscle isoform isoform 2; Uncharacterized protein [Source:UniProtKB/TrEMBL;Acc:F6SK73]	ENSMMUT00000010630	3051	3200	+
ENSMMUG00000032418			ENSMMUT00000047939	1	180	+
ENSMMUG00000009249	RLIM	E3 ubiquitin-protein ligase RLIM; Uncharacterized protein [Source:UniProtKB/TrEMBL;Acc:F7H8F3]	ENSMMUT00000012927	211	360	+
ENSMMUG00000015619	ABCB7	Uncharacterized protein [Source:UniProtKB/TrEMBL;Acc:F6RUB1]	ENSMMUT00000021913	2101	2342	+
ENSMMUG00000021204	UPRT	Uncharacterized protein [Source:UniProtKB/TrEMBL;Acc:F6UIX9]	ENSMMUT00000047936	141	300	+
ENSMMUG00000019569	CXHXORF26	UPF0368 protein Cxorf26; Uncharacterized protein [Source:UniProtKB/TrEMBL;Acc:F7BGP6]	ENSMMUT00000027489	901	1154	+
ENSMMUG00000022574	ATRX	Uncharacterized protein [Source:UniProtKB/TrEMBL;Acc:F6UJ05]	ENSMMUT00000047933	3041	3230	+
ENSMMUG00000014407	MAGT1	magnesium transporter 1 [Source:HGNC Symbol;Acc:HGNC:28880]	ENSMMUT00000020218	1	243	+
ENSMMUG00000010763	BRWD3	bromodomain and WD repeat domain containing 3 [Source:HGNC Symbol;Acc:HGNC:17342]	ENSMMUT00000015047	4591	5243	+
ENSMMUG00000032410		40S ribosomal protein S24 [Source:UniProtKB/TrEMBL;Acc:F7GV47]	ENSMMUT00000015049	211	372	+
ENSMMUG00000016776	CHM	choroideremia (Rab escort protein 1) [Source:HGNC Symbol;Acc:HGNC:1940]	ENSMMUT00000023568	1841	2110	+
ENSMMUG00000000126	PINK1	Serine/threonine-protein kinase PINK1, mitochondrial; Uncharacterized protein [Source:UniProtKB/TrEMBL;Acc:F7H674]	ENSMMUT00000000181	1725	2392	+
ENSMMUG00000022399	PRKRIR	protein-kinase, interferon-inducible double stranded RNA dependent inhibitor, repressor of (P58 repressor) [Source:HGNC Symbol;Acc:HGNC:9440]	ENSMMUT00000031503	331	480	+
ENSMMUG00000004096		Uncharacterized protein [Source:UniProtKB/TrEMBL;Acc:F6ZC17]	ENSMMUT00000005816	276	457	+
ENSMMUG00000013008	CSTF2	Uncharacterized protein [Source:UniProtKB/TrEMBL;Acc:F7HR34]	ENSMMUT00000018243	1201	1520	+
ENSMMUG00000007601	CENPI	centromere protein I [Source:HGNC Symbol;Acc:HGNC:3968]	ENSMMUT00000010637	2011	2250	+
ENSMMUG00000019572	TIMM8A	Mitochondrial import inner membrane translocase subunit Tim8 A isoform 1; Uncharacterized protein [Source:UniProtKB/TrEMBL;Acc:F7BGN5]	ENSMMUT00000027490	101	580	+
ENSMMUG00000019573	BTK	Uncharacterized protein [Source:UniProtKB/TrEMBL;Acc:F6UTT6]	ENSMMUT00000027493	1071	1350	+
ENSMMUG00000019577	GLA	Alpha-galactosidase A; Uncharacterized protein [Source:UniProtKB/TrEMBL;Acc:F7BGG3]	ENSMMUT00000027499	1091	1292	+
ENSMMUG00000019580	HNRPH1	Heterogeneous nuclear ribonucleoprotein H2; Uncharacterized protein [Source:UniProtKB/TrEMBL;Acc:F7BG13]	ENSMMUT00000027500	226	710	+
ENSMMUG00000023604	ARMCX1	ARM protein lost in epithelial cancers on chromosome X 1; Armadillo repeat-containing X-linked protein 1; Uncharacterized protein [Source:UniProtKB/TrEMBL;Acc:F7HDD4]	ENSMMUT00000033207	421	860	+
ENSMMUG00000032394	ARMCX6	armadillo repeat containing, X-linked 6 [Source:HGNC Symbol;Acc:HGNC:26094]	ENSMMUT00000047884	1	344	+
ENSMMUG00000015655	ARMCX3	ARM protein lost in epithelial cancers on chromosome X 3; Armadillo repeat-containing X-linked protein 3; Uncharacterized protein [Source:UniProtKB/TrEMBL;Acc:F6RKR8]	ENSMMUT00000021960	371	780	+
ENSMMUG00000015656	ARMCX2	ARM protein lost in epithelial cancers on chromosome X 2; Armadillo repeat-containing X-linked protein 2; Uncharacterized protein [Source:UniProtKB/TrEMBL;Acc:F6V1Q3]	ENSMMUT00000047883	2141	2310	+
ENSMMUG00000005291	ARMCX5	Uncharacterized protein [Source:UniProtKB/TrEMBL;Acc:F7BBB8]	ENSMMUT00000007443	1021	1220	+
ENSMMUG00000004150	BEX4	Brain-expressed X-linked protein 4; Protein BEX4; Uncharacterized protein [Source:UniProtKB/TrEMBL;Acc:F6XJS0]	ENSMMUT00000005898	76	370	+
ENSMMUG00000004152			ENSMMUT00000005900	361	590	+
ENSMMUG00000006111		Uncharacterized protein [Source:UniProtKB/TrEMBL;Acc:F7B6E6]	ENSMMUT00000047866	289	921	+
ENSMMUG00000004674	PRPS1	Ribose-phosphate pyrophosphokinase 1 isoform 1; Uncharacterized protein [Source:UniProtKB/TrEMBL;Acc:F6RUH7]	ENSMMUT00000006603	621	770	+
ENSMMUG00000016981	PSMD10	Uncharacterized protein [Source:UniProtKB/TrEMBL;Acc:F6WLI1]	ENSMMUT00000023864	581	790	+
ENSMMUG00000007190	ATG4A	Uncharacterized protein [Source:UniProtKB/TrEMBL;Acc:F6WLJ1]	ENSMMUT00000010047	1461	2013	+
ENSMMUG00000004188	ACSL4	Uncharacterized protein [Source:UniProtKB/TrEMBL;Acc:F6WSX9]	ENSMMUT00000005948	1961	2248	+
ENSMMUG00000022822	TMEM164	Transmembrane protein 164; Transmembrane protein 164 isoform b; Uncharacterized protein [Source:UniProtKB/TrEMBL;Acc:F6UNP1]	ENSMMUT00000047846	1641	1800	+
ENSMMUG00000010421	ALG13	UDP-N-acetylglucosamine transferase subunit ALG13 homolog isoform 2; Uncharacterized protein [Source:UniProtKB/TrEMBL;Acc:F7CXN6]	ENSMMUT00000014585	451	550	+
ENSMMUG00000017109		Purine nucleoside phosphorylase [Source:UniProtKB/TrEMBL;Acc:F7H566]	ENSMMUT00000024056	41	140	+
ENSMMUG00000002293	KLHL13	kelch-like family member 13 [Source:HGNC Symbol;Acc:HGNC:22931]	ENSMMUT00000003249	705	900	+
ENSMMUG00000011497	WDR44	Uncharacterized protein [Source:UniProtKB/TrEMBL;Acc:F6WUC2]	ENSMMUT00000047830	1551	1790	+
ENSMMUG00000011498	DOCK11	Uncharacterized protein [Source:UniProtKB/TrEMBL;Acc:F6WUE6]	ENSMMUT00000047828	3851	4010	+
ENSMMUG00000022663	SLC25A5	ADP/ATP translocase 2; Uncharacterized protein [Source:UniProtKB/TrEMBL;Acc:F7GUA1]	ENSMMUT00000031887	151	270	+
ENSMMUG00000022670	NKRF	NF-kappa-B-repressing factor; NF-kappa-B-repressing factor isoform 2; Uncharacterized protein [Source:UniProtKB/TrEMBL;Acc:F7GU34]	ENSMMUT00000031899	2361	2510	+
ENSMMUG00000017669	2015-09-06	Septin-6 isoform D; Uncharacterized protein [Source:UniProtKB/TrEMBL;Acc:F6TJ60]	ENSMMUT00000047822	1141	1511	+
ENSMMUG00000020222	UPF3B	Regulator of nonsense transcripts 3B isoform 2; Uncharacterized protein [Source:UniProtKB/TrEMBL;Acc:F6V224]	ENSMMUT00000028449	1181	1290	+
ENSMMUG00000011076	ZBTB33	Transcriptional regulator Kaiso; Uncharacterized protein [Source:UniProtKB/TrEMBL;Acc:F7FX83]	ENSMMUT00000015486	2001	2150	+
ENSMMUG00000001484	LAMP2	Uncharacterized protein [Source:UniProtKB/TrEMBL;Acc:F6TJH8]	ENSMMUT00000002093	701	950	+
ENSMMUG00000009037	CUL4B	cullin 4B [Source:HGNC Symbol;Acc:HGNC:2555]	ENSMMUT00000012636	2691	3240	+
ENSMMUG00000003745	THOC2	Uncharacterized protein [Source:UniProtKB/TrEMBL;Acc:F6RSZ2]	ENSMMUT00000005302	4001	4540	+
ENSMMUG00000020695	SASH3	SAM and SH3 domain containing 3 [Source:HGNC Symbol;Acc:HGNC:15975]	ENSMMUT00000029109	2441	2610	+
ENSMMUG00000020699	ZDHHC9	zinc finger, DHHC-type containing 9 [Source:HGNC Symbol;Acc:HGNC:18475]	ENSMMUT00000029113	1201	1380	+
ENSMMUG00000008389	RBMX2	RNA-binding motif protein, X-linked 2; Uncharacterized protein [Source:UniProtKB/TrEMBL;Acc:F6TRP5]	ENSMMUT00000047799	431	960	+
ENSMMUG00000016588	RAP2C	Ras-related protein Rap-2c; Uncharacterized protein [Source:UniProtKB/TrEMBL;Acc:F6VPD5]	ENSMMUT00000023294	1201	1430	+
ENSMMUG00000003071	MBNL3	Uncharacterized protein [Source:UniProtKB/TrEMBL;Acc:F6TSM1]	ENSMMUT00000004346	2411	2520	+
ENSMMUG00000032340		Uncharacterized protein [Source:UniProtKB/TrEMBL;Acc:F6TYF1]	ENSMMUT00000047786	41	140	+
ENSMMUG00000007997	PHF6	PHD finger protein 6 isoform 1; Uncharacterized protein [Source:UniProtKB/TrEMBL;Acc:F7HLJ3]	ENSMMUT00000011185	1101	1303	+
ENSMMUG00000008303	HPRT1	hypoxanthine phosphoribosyltransferase 1 [Source:HGNC Symbol;Acc:HGNC:5157]	ENSMMUT00000011614	191	620	+
ENSMMUG00000022140		Uncharacterized protein [Source:UniProtKB/TrEMBL;Acc:F6TZ10]	ENSMMUT00000031141	761	910	+
ENSMMUG00000017881	DDX26B	Uncharacterized protein [Source:UniProtKB/TrEMBL;Acc:F7F5N7]	ENSMMUT00000025125	3431	3610	+
ENSMMUG00000002706	MMGT1	membrane magnesium transporter 1 [Source:HGNC Symbol;Acc:HGNC:28100]	ENSMMUT00000003848	2461	2620	+
ENSMMUG00000011271	SLC9A6	Sodium/hydrogen exchanger [Source:UniProtKB/TrEMBL;Acc:F6WNU8]	ENSMMUT00000015764	4061	4384	+
ENSMMUG00000000297	MAP7D3	MAP7 domain containing 3 [Source:HGNC Symbol;Acc:HGNC:25742]	ENSMMUT00000000435	901	1060	+
ENSMMUG00000006450	HTATSF1	Uncharacterized protein [Source:UniProtKB/TrEMBL;Acc:F7HDT6]	ENSMMUT00000009046	1541	1860	+
ENSMMUG00000013768	ARHGEF6	Rac/Cdc42 guanine nucleotide exchange factor (GEF) 6 [Source:HGNC Symbol;Acc:HGNC:685]	ENSMMUT00000019339	2011	2318	+
ENSMMUG00000000671		Uncharacterized protein [Source:UniProtKB/TrEMBL;Acc:F6Z0U3]	ENSMMUT00000000964	1141	1590	+
ENSMMUG00000016610	CD99L2	Uncharacterized protein [Source:UniProtKB/TrEMBL;Acc:F6TWW6]	ENSMMUT00000023341	961	1190	+
ENSMMUG00000004633	HMGB3	high mobility group box 3 [Source:HGNC Symbol;Acc:HGNC:5004]	ENSMMUT00000006553	491	665	+
ENSMMUG00000013176	NSDHL	Sterol-4-alpha-carboxylate 3-dehydrogenase, decarboxylating; Uncharacterized protein [Source:UniProtKB/TrEMBL;Acc:F6XR64]	ENSMMUT00000018484	1221	1390	+
ENSMMUG00000011480	FAM58A	Cyclin-related protein FAM58A isoform 1; Uncharacterized protein [Source:UniProtKB/TrEMBL;Acc:F7D906]	ENSMMUT00000016078	808	1305	+
ENSMMUG00000012744	BCAP31	Uncharacterized protein [Source:UniProtKB/TrEMBL;Acc:F7ESN9]	ENSMMUT00000017877	821	1120	+
ENSMMUG00000003372	SRPK3	SRSF protein kinase 3 [Source:HGNC Symbol;Acc:HGNC:11402]	ENSMMUT00000004769	1803	1910	+
ENSMMUG00000003374	IDH3G	isocitrate dehydrogenase 3 (NAD+) gamma [Source:HGNC Symbol;Acc:HGNC:5386]	ENSMMUT00000004770	921	1060	+
ENSMMUG00000000323	ARHGAP4	Uncharacterized protein [Source:UniProtKB/TrEMBL;Acc:F6YUI4]	ENSMMUT00000000471	561	730	+
ENSMMUG00000000322	NAA10	N(alpha)-acetyltransferase 10, NatA catalytic subunit [Source:HGNC Symbol;Acc:HGNC:18704]	ENSMMUT00000047730	781	880	+
ENSMMUG00000000319	HCFC1	host cell factor C1 [Source:HGNC Symbol;Acc:HGNC:4839]	ENSMMUT00000000463	3971	4510	+
ENSMMUG00000018704	MECP2	Uncharacterized protein [Source:UniProtKB/TrEMBL;Acc:F6YIN8]	ENSMMUT00000026295	8271	8490	+
ENSMMUG00000013668	FLNA	Uncharacterized protein [Source:UniProtKB/TrEMBL;Acc:F6YS48]	ENSMMUT00000019204	7091	7190	+
ENSMMUG00000005495	DNASE1L1	Deoxyribonuclease [Source:UniProtKB/TrEMBL;Acc:F7FYN3]	ENSMMUT00000007734	1941	2160	+
ENSMMUG00000005498	TAZ	Tafazzin [Source:UniProtKB/Swiss-Prot;Acc:Q6IV77]	ENSMMUT00000047724	1181	1430	+
ENSMMUG00000005502	GDI1	Rab GDP dissociation inhibitor alpha; Uncharacterized protein [Source:UniProtKB/TrEMBL;Acc:F7FLQ1]	ENSMMUT00000007745	2111	2229	+
ENSMMUG00000005505	FAM50A	family with sequence similarity 50, member A [Source:HGNC Symbol;Acc:HGNC:18786]	ENSMMUT00000007747	211	530	+
ENSMMUG00000009015	UBL4A	Ubiquitin-like protein 4A; Uncharacterized protein [Source:UniProtKB/TrEMBL;Acc:F7FHB2]	ENSMMUT00000012596	1641	1820	+
ENSMMUG00000009012	FAM3A	family with sequence similarity 3, member A [Source:HGNC Symbol;Acc:HGNC:13749]	ENSMMUT00000047720	601	710	+
ENSMMUG00000017409	G6PD	glucose-6-phosphate dehydrogenase [Source:HGNC Symbol;Acc:HGNC:4057]	ENSMMUT00000024487	2171	2330	+
ENSMMUG00000017277	IKBKG	inhibitor of kappa light polypeptide gene enhancer in B-cells, kinase gamma [Source:HGNC Symbol;Acc:HGNC:5961]	ENSMMUT00000047716	1381	1540	+
ENSMMUG00000005768	DKC1	H/ACA ribonucleoprotein complex subunit 4 isoform 1; Uncharacterized protein [Source:UniProtKB/TrEMBL;Acc:F6W1E4]	ENSMMUT00000008100	1421	1780	+
ENSMMUG00000010248	FUNDC2	FUN14 domain-containing protein 2 [Source:UniProtKB/TrEMBL;Acc:F6QM97]	ENSMMUT00000014327	451	570	+
ENSMMUG00000023099	LRPAP1	low density lipoprotein receptor-related protein associated protein 1 [Source:HGNC Symbol;Acc:HGNC:6701]	ENSMMUT00000032498	1171	1410	+
ENSMMUG00000015095	VBP1	Uncharacterized protein [Source:UniProtKB/TrEMBL;Acc:F6WUT9]	ENSMMUT00000021153	125	524	+
ENSMMUG00000032308		60S ribosome subunit biogenesis protein NIP7 homolog [Source:UniProtKB/TrEMBL;Acc:F7GMN1]	ENSMMUT00000047709	552	720	+
ENSMMUG00000002015	VAMP7	Uncharacterized protein [Source:UniProtKB/TrEMBL;Acc:F6UTB2]	ENSMMUT00000002855	571	850	+
ENSMMUG00000002016	IL9R	interleukin 9 receptor [Source:HGNC Symbol;Acc:HGNC:6030]	ENSMMUT00000002856	1221	1440	+
ENSMMUG00000008392	HTT	huntingtin [Source:HGNC Symbol;Acc:HGNC:4851]	ENSMMUT00000011739	13083	13270	+
ENSMMUG00000008385	NOP14	NOP14 nucleolar protein [Source:HGNC Symbol;Acc:HGNC:16821]	ENSMMUT00000011729	541	710	+
ENSMMUG00000008383	MFSD10	Uncharacterized protein [Source:UniProtKB/TrEMBL;Acc:F7HMH5]	ENSMMUT00000011722	751	940	+
ENSMMUG00000008379	ADD1	Uncharacterized protein [Source:UniProtKB/TrEMBL;Acc:F7HMH8]	ENSMMUT00000011718	81	260	+
ENSMMUG00000013158	FAM193A	family with sequence similarity 193, member A [Source:HGNC Symbol;Acc:HGNC:16822]	ENSMMUT00000018460	3141	3470	+
ENSMMUG00000007948	RNF4	ring finger protein 4 [Source:HGNC Symbol;Acc:HGNC:10067]	ENSMMUT00000011120	461	570	+
ENSMMUG00000001160	MXD4	Uncharacterized protein [Source:UniProtKB/TrEMBL;Acc:F6RHV5]	ENSMMUT00000001636	3641	3740	+
ENSMMUG00000009943	WHSC1	Uncharacterized protein [Source:UniProtKB/TrEMBL;Acc:F6RJF5]	ENSMMUT00000013882	3086	3271	+
ENSMMUG00000019948	LETM1	leucine zipper-EF-hand containing transmembrane protein 1 [Source:HGNC Symbol;Acc:HGNC:6556]	ENSMMUT00000028035	2091	2210	+
ENSMMUG00000011191	TACC3	transforming, acidic coiled-coil containing protein 3 [Source:HGNC Symbol;Acc:HGNC:11524]	ENSMMUT00000015655	861	1200	+
ENSMMUG00000011190	TMEM129	transmembrane protein 129 [Source:HGNC Symbol;Acc:HGNC:25137]	ENSMMUT00000015651	892	1010	+
ENSMMUG00000008357	MAEA	Uncharacterized protein [Source:UniProtKB/TrEMBL;Acc:F7GP35]	ENSMMUT00000011684	1621	1770	+
ENSMMUG00000008323	CTBP1	C-terminal-binding protein 1 isoform 2; Uncharacterized protein [Source:UniProtKB/TrEMBL;Acc:F7GP87]	ENSMMUT00000047694	1595	1940	+
ENSMMUG00000016919	GAK	cyclin G associated kinase [Source:HGNC Symbol;Acc:HGNC:4113]	ENSMMUT00000023783	2311	2630	+
ENSMMUG00000017457	PIGG	phosphatidylinositol glycan anchor biosynthesis, class G [Source:HGNC Symbol;Acc:HGNC:25985]	ENSMMUT00000024549	1811	2090	+
ENSMMUG00000015800	NOC2L	nucleolar complex associated 2 homolog (S. cerevisiae) [Source:HGNC Symbol;Acc:HGNC:24517]	ENSMMUT00000047680	2091	2490	+
ENSMMUG00000001817	HES4	hes family bHLH transcription factor 4 [Source:HGNC Symbol;Acc:HGNC:24149]	ENSMMUT00000002557	616	830	+
ENSMMUG00000000838	AGRN	agrin [Source:HGNC Symbol;Acc:HGNC:329]	ENSMMUT00000047676	7061	7210	+
ENSMMUG00000018694		Uncharacterized protein [Source:UniProtKB/TrEMBL;Acc:F6YJB5]	ENSMMUT00000026286	471	630	+
ENSMMUG00000019518	SDF4	stromal cell derived factor 4 [Source:HGNC Symbol;Acc:HGNC:24188]	ENSMMUT00000027418	1741	1880	+
ENSMMUG00000010030	UBE2J2	ubiquitin-conjugating enzyme E2, J2 [Source:HGNC Symbol;Acc:HGNC:19268]	ENSMMUT00000047670	591	820	+
ENSMMUG00000013862	ACAP3	Uncharacterized protein [Source:UniProtKB/TrEMBL;Acc:F6RLI5]	ENSMMUT00000019456	1391	1562	+
ENSMMUG00000013866	CPSF3L	cleavage and polyadenylation specific factor 3-like [Source:HGNC Symbol;Acc:HGNC:26052]	ENSMMUT00000047665	2131	2240	+
ENSMMUG00000013875	GLTPD1	Glycolipid transfer protein domain-containing protein 1; Uncharacterized protein [Source:UniProtKB/TrEMBL;Acc:F6RDA0]	ENSMMUT00000019474	1621	1900	+
ENSMMUG00000006904	CCNL2	cyclin L2 [Source:HGNC Symbol;Acc:HGNC:20570]	ENSMMUT00000009647	2111	2813	+
ENSMMUG00000006905	MRPL20	39S ribosomal protein L20, mitochondrial; Uncharacterized protein [Source:UniProtKB/TrEMBL;Acc:F7EZM8]	ENSMMUT00000009648	411	610	+
ENSMMUG00000001549			ENSMMUT00000047660	261	670	+
ENSMMUG00000001551	SSU72	Uncharacterized protein [Source:UniProtKB/TrEMBL;Acc:F7G552]	ENSMMUT00000002192	941	1070	+
ENSMMUG00000012961	MIB2	mindbomb E3 ubiquitin protein ligase 2 [Source:HGNC Symbol;Acc:HGNC:30577]	ENSMMUT00000018174	1391	1580	+
ENSMMUG00000001894			ENSMMUT00000047656	921	1050	+
ENSMMUG00000005578	SLC35E2B	solute carrier family 35, member E2B [Source:HGNC Symbol;Acc:HGNC:33941]	ENSMMUT00000047651	1055	1210	+
ENSMMUG00000010879	NADK	NAD kinase [Source:HGNC Symbol;Acc:HGNC:29831]	ENSMMUT00000015215	565	702	+
ENSMMUG00000001896	GNB1	Guanine nucleotide-binding protein G(I)/G(S)/G(T) subunit beta-1; Uncharacterized protein [Source:UniProtKB/TrEMBL;Acc:F7FXA9]	ENSMMUT00000002674	1131	1364	+
ENSMMUG00000010280	SKI	v-ski avian sarcoma viral oncogene homolog [Source:HGNC Symbol;Acc:HGNC:10896]	ENSMMUT00000014367	611	870	+
ENSMMUG00000012346	RER1	retention in endoplasmic reticulum sorting receptor 1 [Source:HGNC Symbol;Acc:HGNC:30309]	ENSMMUT00000017308	1011	1130	+
ENSMMUG00000014686	PANK4	Pantothenate kinase 4; Uncharacterized protein [Source:UniProtKB/TrEMBL;Acc:F7GTZ5]	ENSMMUT00000020589	2401	2640	+
ENSMMUG00000016329	TNFRSF14	Macaca mulatta tumor necrosis factor receptor superfamily, member 14 (herpesvirus entry mediator) (TNFRSF14), mRNA. [Source:RefSeq mRNA;Acc:NM_001043357]	ENSMMUT00000022931	1161	1399	+
ENSMMUG00000016569	TP73	tumor protein p73 [Source:HGNC Symbol;Acc:HGNC:12003]	ENSMMUT00000023267	1881	2000	+
ENSMMUG00000032284	LRRC47	leucine rich repeat containing 47 [Source:HGNC Symbol;Acc:HGNC:29207]	ENSMMUT00000047630	1591	1730	+
ENSMMUG00000015173	CEP104	centrosomal protein 104kDa [Source:HGNC Symbol;Acc:HGNC:24866]	ENSMMUT00000021276	2991	3160	+
ENSMMUG00000015176	C1orf174	chromosome 1 open reading frame 174 [Source:HGNC Symbol;Acc:HGNC:27915]	ENSMMUT00000021283	451	610	+
ENSMMUG00000016837	KCNAB2	Uncharacterized protein; Voltage-gated potassium channel subunit beta-2 isoform 1 [Source:UniProtKB/TrEMBL;Acc:F7C3Q4]	ENSMMUT00000047625	1111	1240	+
ENSMMUG00000018350	ICMT	isoprenylcysteine carboxyl methyltransferase [Source:HGNC Symbol;Acc:HGNC:5350]	ENSMMUT00000025788	2041	2220	+
ENSMMUG00000004092	GPR153	Uncharacterized protein [Source:UniProtKB/TrEMBL;Acc:F6ZCU5]	ENSMMUT00000005806	1871	2370	+
ENSMMUG00000004094			ENSMMUT00000005809	1361	1460	+
ENSMMUG00000023681	NOL9	nucleolar protein 9 [Source:HGNC Symbol;Acc:HGNC:26265]	ENSMMUT00000047616	2001	2254	+
ENSMMUG00000032281	ZBTB48	zinc finger and BTB domain containing 48 [Source:HGNC Symbol;Acc:HGNC:4930]	ENSMMUT00000025556	2011	2181	+
ENSMMUG00000018181	KLHL21	Uncharacterized protein [Source:UniProtKB/TrEMBL;Acc:F7EDJ1]	ENSMMUT00000047615	1691	2030	+
ENSMMUG00000009537	PHF13	PHD finger protein 13; Uncharacterized protein [Source:UniProtKB/TrEMBL;Acc:F6YEY8]	ENSMMUT00000013312	1081	1546	+
ENSMMUG00000004686	DNAJC11	Uncharacterized protein [Source:UniProtKB/TrEMBL;Acc:F6RU29]	ENSMMUT00000006619	131	240	+
ENSMMUG00000016546	TNFRSF9	Tumor necrosis factor receptor superfamily member 9; Uncharacterized protein [Source:UniProtKB/TrEMBL;Acc:F6W5G6]	ENSMMUT00000023238	621	760	+
ENSMMUG00000019671	PARK7	Uncharacterized protein [Source:UniProtKB/TrEMBL;Acc:F7CMK7]	ENSMMUT00000027633	471	570	+
ENSMMUG00000021399	RERE	Arginine-glutamic acid dipeptide repeats protein isoform a; Uncharacterized protein [Source:UniProtKB/TrEMBL;Acc:F7GDT6]	ENSMMUT00000047610	5331	5480	+
ENSMMUG00000016307	SLC2A5	Solute carrier family 2, facilitated glucose transporter member 5 isoform 1; Uncharacterized protein [Source:UniProtKB/TrEMBL;Acc:F7GT75]	ENSMMUT00000022903	1831	2100	+
ENSMMUG00000016711	H6PD	Uncharacterized protein [Source:UniProtKB/TrEMBL;Acc:F6VEC2]	ENSMMUT00000047594	461	640	+
ENSMMUG00000001958	SLC25A33	solute carrier family 25 (pyrimidine nucleotide carrier), member 33 [Source:HGNC Symbol;Acc:HGNC:29681]	ENSMMUT00000002771	581	730	+
ENSMMUG00000006224	PIK3CD	Uncharacterized protein [Source:UniProtKB/TrEMBL;Acc:F7HLC7]	ENSMMUT00000008706	2951	3180	+
ENSMMUG00000006225	CLSTN1	Calsyntenin-1 isoform 1; Uncharacterized protein [Source:UniProtKB/TrEMBL;Acc:F7HLB8]	ENSMMUT00000008710	3081	3790	+
ENSMMUG00000013292	LZIC	leucine zipper and CTNNBIP1 domain containing [Source:HGNC Symbol;Acc:HGNC:17497]	ENSMMUT00000018661	1	170	+
ENSMMUG00000016296	UBE4B	ubiquitination factor E4B [Source:HGNC Symbol;Acc:HGNC:12500]	ENSMMUT00000022893	3991	4240	+
ENSMMUG00000002171	KIF1B	kinesin family member 1B [Source:HGNC Symbol;Acc:HGNC:16636]	ENSMMUT00000003063	1971	2200	+
ENSMMUG00000019979		Uncharacterized protein [Source:UniProtKB/TrEMBL;Acc:F7FS99]	ENSMMUT00000028081	661	840	+
ENSMMUG00000007456		Uncharacterized protein [Source:UniProtKB/TrEMBL;Acc:F6SW93]	ENSMMUT00000047578	2431	2657	+
ENSMMUG00000019321	SRM	Spermidine synthase; Uncharacterized protein [Source:UniProtKB/TrEMBL;Acc:F6S2N2]	ENSMMUT00000027131	1051	1270	+
ENSMMUG00000019322	EXOSC10	Uncharacterized protein [Source:UniProtKB/TrEMBL;Acc:F6S2J3]	ENSMMUT00000027134	2701	2800	+
ENSMMUG00000019325	MTOR	mechanistic target of rapamycin (serine/threonine kinase) [Source:HGNC Symbol;Acc:HGNC:3942]	ENSMMUT00000027142	31	140	+
ENSMMUG00000032252	UBIAD1	UbiA prenyltransferase domain-containing protein 1; Uncharacterized protein [Source:UniProtKB/TrEMBL;Acc:F7GJ37]	ENSMMUT00000047577	1111	1450	+
ENSMMUG00000023669	MAD2L2	Uncharacterized protein [Source:UniProtKB/TrEMBL;Acc:F7GJ53]	ENSMMUT00000033295	825	950	+
ENSMMUG00000004677	AGTRAP	Type-1 angiotensin II receptor-associated protein isoform a; Uncharacterized protein [Source:UniProtKB/TrEMBL;Acc:F6RUB9]	ENSMMUT00000006609	511	790	+
ENSMMUG00000007828	MTHFR	Methylenetetrahydrofolate reductase [Source:UniProtKB/TrEMBL;Acc:F7CI98]	ENSMMUT00000047571	1921	2310	+
ENSMMUG00000007829	CLCN6	Uncharacterized protein [Source:UniProtKB/TrEMBL;Acc:F7CI60]	ENSMMUT00000010966	5171	5330	+
ENSMMUG00000023449	MFN2	mitofusin 2 [Source:HGNC Symbol;Acc:HGNC:16877]	ENSMMUT00000032989	2041	2250	+
ENSMMUG00000008340	TNFRSF8	tumor necrosis factor receptor superfamily, member 8 [Source:HGNC Symbol;Acc:HGNC:11923]	ENSMMUT00000011663	2321	2680	+
ENSMMUG00000021447	TNFRSF1B	Tumor necrosis factor receptor superfamily member 1B; Uncharacterized protein [Source:UniProtKB/TrEMBL;Acc:F7EAE4]	ENSMMUT00000030188	1771	2030	+
ENSMMUG00000032246		Uncharacterized protein [Source:UniProtKB/TrEMBL;Acc:F7GUU4]	ENSMMUT00000047561	1511	1810	+
ENSMMUG00000005681	DHRS3	Short-chain dehydrogenase/reductase 3; Uncharacterized protein [Source:UniProtKB/TrEMBL;Acc:F6U5I2]	ENSMMUT00000007984	1321	1560	+
ENSMMUG00000017040	PRDM2	Uncharacterized protein [Source:UniProtKB/TrEMBL;Acc:F7B9E8]	ENSMMUT00000047558	5331	5430	+
ENSMMUG00000005951	EFHD2	EF-hand domain-containing protein D2; Uncharacterized protein [Source:UniProtKB/TrEMBL;Acc:F6UUX9]	ENSMMUT00000008333	1111	1300	+
ENSMMUG00000018163	CASP9	caspase 9, apoptosis-related cysteine peptidase [Source:HGNC Symbol;Acc:HGNC:1511]	ENSMMUT00000047552	131	330	+
ENSMMUG00000013760		Uncharacterized protein [Source:UniProtKB/TrEMBL;Acc:F7F525]	ENSMMUT00000047550	751	850	+
ENSMMUG00000019912	DDI2	DNA-damage inducible 1 homolog 2 (S. cerevisiae) [Source:HGNC Symbol;Acc:HGNC:24578]	ENSMMUT00000027974	2341	2460	+
ENSMMUG00000016281	PLEKHM2	pleckstrin homology domain containing, family M (with RUN domain) member 2 [Source:HGNC Symbol;Acc:HGNC:29131]	ENSMMUT00000022871	1356	1750	+
ENSMMUG00000008026	SPEN	spen family transcriptional repressor [Source:HGNC Symbol;Acc:HGNC:17575]	ENSMMUT00000011233	11171	11490	+
ENSMMUG00000008031	ZBTB17	Uncharacterized protein [Source:UniProtKB/TrEMBL;Acc:F7FNS0]	ENSMMUT00000011238	2501	2723	+
ENSMMUG00000012733	FBXO42	F-box only protein 42; Uncharacterized protein [Source:UniProtKB/TrEMBL;Acc:F7ETH8]	ENSMMUT00000017856	2021	2402	+
ENSMMUG00000019940	NECAP2	Uncharacterized protein [Source:UniProtKB/TrEMBL;Acc:F7G079]	ENSMMUT00000028017	951	1200	+
ENSMMUG00000001610	ATP13A2	Uncharacterized protein [Source:UniProtKB/TrEMBL;Acc:F7FP50]	ENSMMUT00000002283	3591	3830	+
ENSMMUG00000001616	PADI2	peptidyl arginine deiminase, type II [Source:HGNC Symbol;Acc:HGNC:18341]	ENSMMUT00000002293	4141	4310	+
ENSMMUG00000006669	UBR4	ubiquitin protein ligase E3 component n-recognin 4 [Source:HGNC Symbol;Acc:HGNC:30313]	ENSMMUT00000009356	14220	14627	+
ENSMMUG00000006688	EMC1	Uncharacterized protein [Source:UniProtKB/TrEMBL;Acc:F7FSE2]	ENSMMUT00000009373	4081	4200	+
ENSMMUG00000006695	MRTO4	Uncharacterized protein; mRNA turnover protein 4 homolog [Source:UniProtKB/TrEMBL;Acc:F7HJV5]	ENSMMUT00000009376	641	982	+
ENSMMUG00000006892	PQLC2	PQ loop repeat containing 2 [Source:HGNC Symbol;Acc:HGNC:26001]	ENSMMUT00000047524	1751	2010	+
ENSMMUG00000006894	CAPZB	capping protein (actin filament) muscle Z-line, beta [Source:HGNC Symbol;Acc:HGNC:1491]	ENSMMUT00000009634	1071	1190	+
ENSMMUG00000006908	MUL1	Mitochondrial ubiquitin ligase activator of NFKB 1; Uncharacterized protein [Source:UniProtKB/TrEMBL;Acc:F7EZL0]	ENSMMUT00000009650	441	700	+
ENSMMUG00000008852	HP1BP3	Uncharacterized protein [Source:UniProtKB/TrEMBL;Acc:F7DYV3]	ENSMMUT00000012381	1601	1770	+
ENSMMUG00000004149	EIF4G3	eukaryotic translation initiation factor 4 gamma, 3 [Source:HGNC Symbol;Acc:HGNC:3298]	ENSMMUT00000013999	1281	1501	+
ENSMMUG00000010942	ECE1	endothelin converting enzyme 1 [Source:HGNC Symbol;Acc:HGNC:3146]	ENSMMUT00000015315	2381	2550	+
ENSMMUG00000017344	USP48	ubiquitin specific peptidase 48 [Source:HGNC Symbol;Acc:HGNC:18533]	ENSMMUT00000024395	2801	2970	+
ENSMMUG00000022009	CDC42	cell division cycle 42 [Source:HGNC Symbol;Acc:HGNC:1736]	ENSMMUT00000030969	1611	1710	+
ENSMMUG00000009773	KDM1A	Uncharacterized protein [Source:UniProtKB/TrEMBL;Acc:F6ZH68]	ENSMMUT00000013655	2811	2980	+
ENSMMUG00000010970	HNRNPR	Uncharacterized protein [Source:UniProtKB/TrEMBL;Acc:F7GDH1]	ENSMMUT00000015348	1561	1740	+
ENSMMUG00000011832	E2F2	E2F transcription factor 2 [Source:HGNC Symbol;Acc:HGNC:3114]	ENSMMUT00000016580	1231	1540	+
ENSMMUG00000005560	ID3	DNA-binding protein inhibitor ID-3; Uncharacterized protein [Source:UniProtKB/TrEMBL;Acc:F7GBM3]	ENSMMUT00000007821	561	820	+
ENSMMUG00000003173	TCEB3	transcription elongation factor B (SIII), polypeptide 3 (110kDa, elongin A) [Source:HGNC Symbol;Acc:HGNC:11620]	ENSMMUT00000004493	2171	2360	+
ENSMMUG00000019554	PITHD1	PITH domain-containing protein 1; Uncharacterized protein [Source:UniProtKB/TrEMBL;Acc:F7CKL5]	ENSMMUT00000027463	641	1040	+
ENSMMUG00000019551	LYPLA2	Uncharacterized protein [Source:UniProtKB/TrEMBL;Acc:F7CKM3]	ENSMMUT00000047497	1	160	+
ENSMMUG00000019549	GALE	UDP-glucose 4-epimerase; Uncharacterized protein [Source:UniProtKB/TrEMBL;Acc:F7CKR0]	ENSMMUT00000027457	1021	1220	+
ENSMMUG00000019548	HMGCL	Uncharacterized protein [Source:UniProtKB/TrEMBL;Acc:F7CQT4]	ENSMMUT00000027454	1151	1470	+
ENSMMUG00000004216	FUCA1	fucosidase, alpha-L- 1, tissue [Source:HGNC Symbol;Acc:HGNC:4006]	ENSMMUT00000005987	1247	1400	+
ENSMMUG00000013783	PNRC2	proline-rich nuclear receptor coactivator 2 [Source:HGNC Symbol;Acc:HGNC:23158]	ENSMMUT00000019350	261	726	+
ENSMMUG00000004466	NIPAL3	NIPA-like domain containing 3 [Source:HGNC Symbol;Acc:HGNC:25233]	ENSMMUT00000006327	1521	1810	+
ENSMMUG00000006645	SRRM1	serine/arginine repetitive matrix 1 [Source:HGNC Symbol;Acc:HGNC:16638]	ENSMMUT00000047488	2561	2780	+
ENSMMUG00000002416	CLIC4	Chloride intracellular channel protein 4; Uncharacterized protein [Source:UniProtKB/TrEMBL;Acc:F6PP70]	ENSMMUT00000003434	3071	3250	+
ENSMMUG00000002420	RUNX3	runt-related transcription factor 3 [Source:HGNC Symbol;Acc:HGNC:10473]	ENSMMUT00000003439	959	1260	+
ENSMMUG00000002970	RSRP1	arginine/serine-rich protein 1 [Source:HGNC Symbol;Acc:HGNC:25234]	ENSMMUT00000004211	381	700	+
ENSMMUG00000023385	LDLRAP1	low density lipoprotein receptor adaptor protein 1 [Source:HGNC Symbol;Acc:HGNC:18640]	ENSMMUT00000032904	1541	1690	+
ENSMMUG00000007854	MTFR1L	mitochondrial fission regulator 1-like [Source:HGNC Symbol;Acc:HGNC:28836]	ENSMMUT00000011001	1201	1660	+
ENSMMUG00000016874	PDIK1L	PDLIM1 interacting kinase 1 like [Source:HGNC Symbol;Acc:HGNC:18981]	ENSMMUT00000047477	231	630	+
ENSMMUG00000004682	ZNF593	Uncharacterized protein; Zinc finger protein 593 [Source:UniProtKB/TrEMBL;Acc:F6RU82]	ENSMMUT00000006614	414	620	+
ENSMMUG00000000644	CEP85	Centrosomal protein of 85 kDa; Uncharacterized protein [Source:UniProtKB/TrEMBL;Acc:F6XS40]	ENSMMUT00000000928	2202	2586	+
ENSMMUG00000000646	SH3BGRL3	Uncharacterized protein [Source:UniProtKB/TrEMBL;Acc:F6XR95]	ENSMMUT00000000932	1301	1445	+
ENSMMUG00000010240	CD52	CAMPATH-1 antigen; Uncharacterized protein [Source:UniProtKB/TrEMBL;Acc:F6QMS2]	ENSMMUT00000014314	11	140	+
ENSMMUG00000022426	DHDDS	Uncharacterized protein [Source:UniProtKB/TrEMBL;Acc:F6XBP5]	ENSMMUT00000047465	2971	3070	+
ENSMMUG00000022111	RPS6KA1	ribosomal protein S6 kinase, 90kDa, polypeptide 1 [Source:HGNC Symbol;Acc:HGNC:10430]	ENSMMUT00000031109	2961	3158	+
ENSMMUG00000012697	ARID1A	Uncharacterized protein [Source:UniProtKB/TrEMBL;Acc:F7DX46]	ENSMMUT00000017806	6381	6630	+
ENSMMUG00000013856	ZDHHC18	zinc finger, DHHC-type containing 18 [Source:HGNC Symbol;Acc:HGNC:20712]	ENSMMUT00000019446	821	1130	+
ENSMMUG00000016893	SLC9A1	Sodium/hydrogen exchanger [Source:UniProtKB/TrEMBL;Acc:F7CQM0]	ENSMMUT00000023727	491	650	+
ENSMMUG00000004762	WDTC1	Uncharacterized protein; WD and tetratricopeptide repeats protein 1 [Source:UniProtKB/TrEMBL;Acc:F6SM88]	ENSMMUT00000006729	3881	3980	+
ENSMMUG00000004767	TMEM222	Uncharacterized protein [Source:UniProtKB/TrEMBL;Acc:F6SM64]	ENSMMUT00000047451	606	940	+
ENSMMUG00000004768	SYTL1	synaptotagmin-like 1 [Source:HGNC Symbol;Acc:HGNC:15584]	ENSMMUT00000006734	461	660	+
ENSMMUG00000018221	WASF2	WAS protein family, member 2 [Source:HGNC Symbol;Acc:HGNC:12733]	ENSMMUT00000025610	481	680	+
ENSMMUG00000014434	FGR	Tyrosine-protein kinase Fgr; Uncharacterized protein [Source:UniProtKB/TrEMBL;Acc:F7BHF8]	ENSMMUT00000020255	1931	2110	+
ENSMMUG00000011454	2015-06-16	Macaca mulatta 6-16 protein-like (6-16), mRNA. [Source:RefSeq mRNA;Acc:NM_001048170]	ENSMMUT00000016036	691	810	+
ENSMMUG00000012252	STX12	Uncharacterized protein [Source:UniProtKB/TrEMBL;Acc:F6V089]	ENSMMUT00000047443	601	730	+
ENSMMUG00000006933	PPP1R8	Uncharacterized protein [Source:UniProtKB/TrEMBL;Acc:F7E1S7]	ENSMMUT00000032572	651	1062	+
ENSMMUG00000017080	DNAJC8	DnaJ homolog subfamily C member 8; Uncharacterized protein [Source:UniProtKB/TrEMBL;Acc:F7HJB1]	ENSMMUT00000024014	451	650	+
ENSMMUG00000019993	SESN2	Sestrin-2; Uncharacterized protein [Source:UniProtKB/TrEMBL;Acc:F7FNU6]	ENSMMUT00000028099	2981	3150	+
ENSMMUG00000018338		Uncharacterized protein [Source:UniProtKB/TrEMBL;Acc:F7H672]	ENSMMUT00000025772	691	820	+
ENSMMUG00000006561	TRNAU1AP	tRNA selenocysteine 1 associated protein 1 [Source:HGNC Symbol;Acc:HGNC:30813]	ENSMMUT00000009190	621	720	+
ENSMMUG00000011391	YTHDF2	Uncharacterized protein [Source:UniProtKB/TrEMBL;Acc:F6W6I0]	ENSMMUT00000047434	1901	2070	+
ENSMMUG00000011377	EPB41	erythrocyte membrane protein band 4.1 [Source:HGNC Symbol;Acc:HGNC:3377]	ENSMMUT00000015930	1514	1650	+
ENSMMUG00000007110	SRSF4	Serine/arginine-rich splicing factor 4; Uncharacterized protein [Source:UniProtKB/TrEMBL;Acc:F7DYE3]	ENSMMUT00000009922	841	1020	+
ENSMMUG00000015659	MECR	Trans-2-enoyl-CoA reductase, mitochondrial isoform a; Uncharacterized protein [Source:UniProtKB/TrEMBL;Acc:F6RDJ9]	ENSMMUT00000021963	1821	1990	+
ENSMMUG00000008744	LAPTM5	lysosomal protein transmembrane 5 [Source:HGNC Symbol;Acc:HGNC:29612]	ENSMMUT00000012216	1	100	+
ENSMMUG00000013520	PUM1	Pumilio homolog 1 isoform 1; Uncharacterized protein [Source:UniProtKB/TrEMBL;Acc:F6Z785]	ENSMMUT00000018986	3661	3851	+
ENSMMUG00000019406	SNRNP40	U5 small nuclear ribonucleoprotein 40 kDa protein; Uncharacterized protein [Source:UniProtKB/TrEMBL;Acc:F6SV59]	ENSMMUT00000027255	1251	1410	+
ENSMMUG00000023397		Uncharacterized protein [Source:UniProtKB/TrEMBL;Acc:F7FE57]	ENSMMUT00000032920	871	1090	+
ENSMMUG00000012930	PTP4A2	protein tyrosine phosphatase type IVA, member 2 [Source:HGNC Symbol;Acc:HGNC:9635]	ENSMMUT00000018132	391	649	+
ENSMMUG00000015650	TMEM39B	Transmembrane protein 39B; Uncharacterized protein [Source:UniProtKB/TrEMBL;Acc:F6RKY8]	ENSMMUT00000021954	1501	1773	+
ENSMMUG00000008455	KPNA6	Uncharacterized protein [Source:UniProtKB/TrEMBL;Acc:F6UVJ8]	ENSMMUT00000047421	1591	2019	+
ENSMMUG00000008453	TMEM234	transmembrane protein 234 [Source:HGNC Symbol;Acc:HGNC:28837]	ENSMMUT00000047418	991	1210	+
ENSMMUG00000009948	HDAC1	Histone deacetylase [Source:UniProtKB/TrEMBL;Acc:F6RIU8]	ENSMMUT00000013891	991	1320	+
ENSMMUG00000009951	MARCKSL1	MARCKS-related protein; Uncharacterized protein [Source:UniProtKB/TrEMBL;Acc:F6RIS3]	ENSMMUT00000013893	701	870	+
ENSMMUG00000001264	BSDC1	Uncharacterized protein [Source:UniProtKB/TrEMBL;Acc:F7CXY4]	ENSMMUT00000047415	1231	1360	+
ENSMMUG00000009940	RBBP4	Histone-binding protein RBBP4 isoform a; Uncharacterized protein [Source:UniProtKB/TrEMBL;Acc:F6RJL6]	ENSMMUT00000013878	341	500	+
ENSMMUG00000019746	YARS	tyrosyl-tRNA synthetase [Source:HGNC Symbol;Acc:HGNC:12840]	ENSMMUT00000027750	1921	2060	+
ENSMMUG00000006282	RNF19B	ring finger protein 19B [Source:HGNC Symbol;Acc:HGNC:26886]	ENSMMUT00000008793	1	100	+
ENSMMUG00000003267	ZNF362	Uncharacterized protein; Zinc finger protein 362 [Source:UniProtKB/TrEMBL;Acc:F7DIM6]	ENSMMUT00000004621	1605	1950	+
ENSMMUG00000003269	PHC2	Uncharacterized protein [Source:UniProtKB/TrEMBL;Acc:F7DIK0]	ENSMMUT00000004629	2553	2850	+
ENSMMUG00000012505		Uncharacterized protein [Source:UniProtKB/TrEMBL;Acc:F7EGX3]	ENSMMUT00000017538	301	410	+
ENSMMUG00000005000	ZMYM6NB	Uncharacterized protein; Zinc finger MYM-type protein 6 [Source:UniProtKB/TrEMBL;Acc:F7AMY0]	ENSMMUT00000007049	3731	3940	+
ENSMMUG00000019793	ZMYM4	Uncharacterized protein [Source:UniProtKB/TrEMBL;Acc:F7G1U3]	ENSMMUT00000027829	4481	4840	+
ENSMMUG00000019812	NCDN	Neurochondrin isoform 1; Uncharacterized protein [Source:UniProtKB/TrEMBL;Acc:F7G1A2]	ENSMMUT00000027841	361	626	+
ENSMMUG00000013090	PSMB2	Proteasome subunit beta type [Source:UniProtKB/TrEMBL;Acc:F6XJL9]	ENSMMUT00000018360	1	140	+
ENSMMUG00000006251	AGO1	argonaute RISC catalytic component 1 [Source:HGNC Symbol;Acc:HGNC:3262]	ENSMMUT00000008747	5871	6130	+
ENSMMUG00000022500	MAP7D1	MAP7 domain containing 1 [Source:HGNC Symbol;Acc:HGNC:25514]	ENSMMUT00000031649	2141	2320	+
ENSMMUG00000012030	ADPRHL2	Uncharacterized protein [Source:UniProtKB/TrEMBL;Acc:F7GRS8]	ENSMMUT00000016849	1151	1320	+
ENSMMUG00000022499	TRAPPC3	Trafficking protein particle complex subunit 3; Uncharacterized protein [Source:UniProtKB/TrEMBL;Acc:F7A3R2]	ENSMMUT00000031638	611	839	+
ENSMMUG00000014622	THRAP3	Thyroid hormone receptor-associated protein 3; Uncharacterized protein [Source:UniProtKB/TrEMBL;Acc:F7GNF6]	ENSMMUT00000020506	3121	3240	+
ENSMMUG00000016212	STK40	serine/threonine kinase 40 [Source:HGNC Symbol;Acc:HGNC:21373]	ENSMMUT00000022778	1941	2090	+
ENSMMUG00000010323	ZC3H12A	Uncharacterized protein [Source:UniProtKB/TrEMBL;Acc:F6RGY4]	ENSMMUT00000014442	1071	1480	+
ENSMMUG00000008421	SNIP1	Smad nuclear-interacting protein 1; Uncharacterized protein [Source:UniProtKB/TrEMBL;Acc:F6VCH4]	ENSMMUT00000011771	1071	1310	+
ENSMMUG00000008419	GNL2	guanine nucleotide binding protein-like 2 (nucleolar) [Source:HGNC Symbol;Acc:HGNC:29925]	ENSMMUT00000011769	1471	1600	+
ENSMMUG00000005372	YRDC	YrdC domain-containing protein, mitochondrial [Source:UniProtKB/TrEMBL;Acc:H9F8J3]	ENSMMUT00000007561	1171	1320	+
ENSMMUG00000023199	SF3A3	splicing factor 3a, subunit 3, 60kDa [Source:HGNC Symbol;Acc:HGNC:10767]	ENSMMUT00000032635	1	110	+
ENSMMUG00000023634	RRAGC	Uncharacterized protein [Source:UniProtKB/TrEMBL;Acc:F7H1S0]	ENSMMUT00000033247	1671	1850	+
ENSMMUG00000009562		Uncharacterized protein [Source:UniProtKB/TrEMBL;Acc:F6X516]	ENSMMUT00000013356	1851	2210	+
ENSMMUG00000007497	PABPC4	Polyadenylate-binding protein 4 isoform 3; Uncharacterized protein [Source:UniProtKB/TrEMBL;Acc:F6QKA5]	ENSMMUT00000010491	1421	1800	+
ENSMMUG00000018869	PPIE	Peptidyl-prolyl cis-trans isomerase [Source:UniProtKB/TrEMBL;Acc:F6WZW1]	ENSMMUT00000026526	1001	1272	+
ENSMMUG00000016220	TRIT1	Uncharacterized protein [Source:UniProtKB/TrEMBL;Acc:F7FQY3]	ENSMMUT00000022790	1771	2089	+
ENSMMUG00000009188	CAP1	Adenylyl cyclase-associated protein [Source:UniProtKB/TrEMBL;Acc:F7FR05]	ENSMMUT00000012844	901	1150	+
ENSMMUG00000009189	PPT1	Uncharacterized protein [Source:UniProtKB/TrEMBL;Acc:F7HMC2]	ENSMMUT00000012845	31	170	+
ENSMMUG00000032180	RLF	rearranged L-myc fusion [Source:HGNC Symbol;Acc:HGNC:10025]	ENSMMUT00000047364	5271	5480	+
ENSMMUG00000005992	ZMPSTE24	CAAX prenyl protease 1 homolog; Uncharacterized protein [Source:UniProtKB/TrEMBL;Acc:F6UEH3]	ENSMMUT00000008382	1361	1590	+
ENSMMUG00000013839	SMAP2	Stromal membrane-associated protein 2 isoform 1; Uncharacterized protein [Source:UniProtKB/TrEMBL;Acc:F6SYR6]	ENSMMUT00000019423	1191	1400	+
ENSMMUG00000017101	CTPS	CTP synthase [Source:UniProtKB/TrEMBL;Acc:F7H5B5]	ENSMMUT00000024045	2221	2471	+
ENSMMUG00000016215	HIVEP3	Uncharacterized protein [Source:UniProtKB/TrEMBL;Acc:F7FTZ7]	ENSMMUT00000022785	7841	7970	+
ENSMMUG00000014138	FOXJ3	Uncharacterized protein [Source:UniProtKB/TrEMBL;Acc:F7C0R5]	ENSMMUT00000019844	2091	2270	+
ENSMMUG00000013126	PPCS	phosphopantothenoylcysteine synthetase [Source:HGNC Symbol;Acc:HGNC:25686]	ENSMMUT00000018414	941	1250	+
ENSMMUG00000013653	KDM5A	lysine (K)-specific demethylase 5A [Source:HGNC Symbol;Acc:HGNC:9886]	ENSMMUT00000047342	5071	5180	+
ENSMMUG00000018650	WNK1	WNK lysine deficient protein kinase 1 [Source:HGNC Symbol;Acc:HGNC:14540]	ENSMMUT00000014449	6311	6785	+
ENSMMUG00000022381	LEPRE1	leucine proline-enriched proteoglycan (leprecan) 1 [Source:HGNC Symbol;Acc:HGNC:19316]	ENSMMUT00000031482	2571	2940	+
ENSMMUG00000019440	FBXL14	F-box and leucine-rich repeat protein 14; F-box/LRR-repeat protein 14; Uncharacterized protein [Source:UniProtKB/TrEMBL;Acc:F6R1C1]	ENSMMUT00000027308	961	1110	+
ENSMMUG00000017262	ADIPOR2	Adiponectin receptor protein 2; Progestin and adipoQ receptor family member II; Uncharacterized protein [Source:UniProtKB/TrEMBL;Acc:F7GWW1]	ENSMMUT00000024271	3811	3930	+
ENSMMUG00000016111	C1H1ORF50	Uncharacterized protein; Uncharacterized protein C1orf50 [Source:UniProtKB/TrEMBL;Acc:F7GIR8]	ENSMMUT00000022655	531	770	+
ENSMMUG00000000373	SLC2A1	Solute carrier family 2, facilitated glucose transporter member 1; Uncharacterized protein [Source:UniProtKB/TrEMBL;Acc:F6YFI2]	ENSMMUT00000000538	2001	2266	+
ENSMMUG00000002640	EBNA1BP2	Uncharacterized protein [Source:UniProtKB/TrEMBL;Acc:F7H747]	ENSMMUT00000003764	971	1159	+
ENSMMUG00000010660	TIE1	Uncharacterized protein [Source:UniProtKB/TrEMBL;Acc:F7B4Q3]	ENSMMUT00000014912	3601	3740	+
ENSMMUG00000007405	FKBP4	FK506 binding protein 4, 59kDa [Source:HGNC Symbol;Acc:HGNC:3720]	ENSMMUT00000010356	1401	1520	+
ENSMMUG00000019385	FOXM1	forkhead box M1 [Source:HGNC Symbol;Acc:HGNC:3818]	ENSMMUT00000027225	2021	2170	+
ENSMMUG00000004171	RHNO1	Uncharacterized protein [Source:UniProtKB/TrEMBL;Acc:F6XB13]	ENSMMUT00000005924	551	700	+
ENSMMUG00000003152	ELOVL1	Elongation of very long chain fatty acids protein 1; Uncharacterized protein [Source:UniProtKB/TrEMBL;Acc:F7FUS0]	ENSMMUT00000004468	931	1220	+
ENSMMUG00000032172		Uncharacterized protein [Source:UniProtKB/TrEMBL;Acc:F7FUJ1]	ENSMMUT00000047332	271	480	+
ENSMMUG00000023671	MED8	mediator complex subunit 8 [Source:HGNC Symbol;Acc:HGNC:19971]	ENSMMUT00000033305	611	770	+
ENSMMUG00000023674	C1ORF84	Uncharacterized protein [Source:UniProtKB/TrEMBL;Acc:F7FUT6]	ENSMMUT00000033310	7861	8292	+
ENSMMUG00000018273	PARP11	Poly [ADP-ribose] polymerase 11; Uncharacterized protein [Source:UniProtKB/TrEMBL;Acc:F7HM89]	ENSMMUT00000025675	881	1200	+
ENSMMUG00000008546	CCND2	cyclin D2 [Source:HGNC Symbol;Acc:HGNC:1583]	ENSMMUT00000011951	701	860	+
ENSMMUG00000008548	C12orf5	chromosome 12 open reading frame 5 [Source:HGNC Symbol;Acc:HGNC:1185]	ENSMMUT00000011952	701	900	+
ENSMMUG00000020813		Uncharacterized protein [Source:UniProtKB/TrEMBL;Acc:F7H7P1]	ENSMMUT00000029283	1011	1250	+
ENSMMUG00000012479	KDM4A	lysine (K)-specific demethylase 4A [Source:HGNC Symbol;Acc:HGNC:22978]	ENSMMUT00000017497	2881	3160	+
ENSMMUG00000015555	ST3GAL3	Uncharacterized protein [Source:UniProtKB/TrEMBL;Acc:F6Q803]	ENSMMUT00000047317	2081	2340	+
ENSMMUG00000014266	TAPBPL	Tapasin-related protein; Uncharacterized protein [Source:UniProtKB/TrEMBL;Acc:F7BYR4]	ENSMMUT00000047319	1531	1640	+
ENSMMUG00000000377	TNFRSF1A	tumor necrosis factor receptor superfamily, member 1A [Source:HGNC Symbol;Acc:HGNC:11916]	ENSMMUT00000000541	1461	1600	+
ENSMMUG00000020213	LTBR	Tumor necrosis factor receptor superfamily member 3; Uncharacterized protein [Source:UniProtKB/TrEMBL;Acc:F6V995]	ENSMMUT00000028437	1841	1960	+
ENSMMUG00000014265	CD27	CD27L receptor; Uncharacterized protein [Source:UniProtKB/TrEMBL;Acc:F7BYS2]	ENSMMUT00000020014	1061	1296	+
ENSMMUG00000014262	VAMP1	Uncharacterized protein; Vesicle-associated membrane protein 1 isoform 2 [Source:UniProtKB/TrEMBL;Acc:F7BYS8]	ENSMMUT00000020013	233	380	+
ENSMMUG00000018677	NCAPD2	Condensin complex subunit 1 [Source:UniProtKB/TrEMBL;Acc:F6ZY62]	ENSMMUT00000026258	4061	4360	+
ENSMMUG00000015142	IPO13	Uncharacterized protein [Source:UniProtKB/TrEMBL;Acc:F6UE53]	ENSMMUT00000021235	861	1485	+
ENSMMUG00000018679	GAPDH	Glyceraldehyde-3-phosphate dehydrogenase; Uncharacterized protein [Source:UniProtKB/TrEMBL;Acc:F6WJJ6]	ENSMMUT00000008204	1181	1340	+
ENSMMUG00000015150	DPH2	DPH2 homolog (S. cerevisiae) [Source:HGNC Symbol;Acc:HGNC:3004]	ENSMMUT00000021242	1531	1740	+
ENSMMUG00000018681	IFFO1	intermediate filament family orphan 1 [Source:HGNC Symbol;Acc:HGNC:24970]	ENSMMUT00000026264	1671	1790	+
ENSMMUG00000015154	ATP6V0B	Uncharacterized protein; V-type proton ATPase 21 kDa proteolipid subunit isoform 1 [Source:UniProtKB/TrEMBL;Acc:F6UDI5]	ENSMMUT00000047311	1631	1740	+
ENSMMUG00000018683	NOP2	NOP2 nucleolar protein [Source:HGNC Symbol;Acc:HGNC:7867]	ENSMMUT00000026269	2161	2380	+
ENSMMUG00000018685	CHD4	chromodomain helicase DNA binding protein 4 [Source:HGNC Symbol;Acc:HGNC:1919]	ENSMMUT00000026275	4761	5250	+
ENSMMUG00000015158	SLC6A9	Transporter [Source:UniProtKB/TrEMBL;Acc:F6UD64]	ENSMMUT00000021254	1891	2130	+
ENSMMUG00000011645	DMAP1	Uncharacterized protein [Source:UniProtKB/TrEMBL;Acc:F6PT62]	ENSMMUT00000047308	941	1170	+
ENSMMUG00000016985	ING4	Uncharacterized protein [Source:UniProtKB/TrEMBL;Acc:F7AYZ2]	ENSMMUT00000023867	351	560	+
ENSMMUG00000011651	ERI3	ERI1 exoribonuclease 3; Uncharacterized protein [Source:UniProtKB/TrEMBL;Acc:F6PT31]	ENSMMUT00000047305	1611	1750	+
ENSMMUG00000016990	ZNF384	Uncharacterized protein [Source:UniProtKB/TrEMBL;Acc:F6PRQ4]	ENSMMUT00000023877	1531	1730	+
ENSMMUG00000012206	MLF2	Myelodysplasia-myeloid leukemia factor 2; Myeloid leukemia factor 2; Uncharacterized protein [Source:UniProtKB/TrEMBL;Acc:F6VND2]	ENSMMUT00000017095	1371	1522	+
ENSMMUG00000021929	KIF2C	Uncharacterized protein [Source:UniProtKB/TrEMBL;Acc:F6T486]	ENSMMUT00000047297	451	650	+
ENSMMUG00000005192	USP5	Ubiquitin carboxyl-terminal hydrolase [Source:UniProtKB/TrEMBL;Acc:F7CT78]	ENSMMUT00000007312	2541	2770	+
ENSMMUG00000009443	ENO2	Gamma-enolase; Uncharacterized protein [Source:UniProtKB/TrEMBL;Acc:F6X1V9]	ENSMMUT00000047285	2711	2830	+
ENSMMUG00000010203	PTPN6	protein tyrosine phosphatase, non-receptor type 6 [Source:HGNC Symbol;Acc:HGNC:9658]	ENSMMUT00000014246	1764	1930	+
ENSMMUG00000010207	EMG1	Nucleolar protein EMG1-like protein; Ribosomal RNA small subunit methyltransferase NEP1; Uncharacterized protein [Source:UniProtKB/TrEMBL;Acc:F6SII9]	ENSMMUT00000014251	729	918	+
ENSMMUG00000010210	LPCAT3	Lysophospholipid acyltransferase 5; Uncharacterized protein [Source:UniProtKB/TrEMBL;Acc:F6SI36]	ENSMMUT00000014255	2111	2270	+
ENSMMUG00000020079	MUTYH	Uncharacterized protein [Source:UniProtKB/TrEMBL;Acc:F7G5B4]	ENSMMUT00000028242	351	570	+
ENSMMUG00000006470	C1R	complement component 1, r subcomponent [Source:HGNC Symbol;Acc:HGNC:1246]	ENSMMUT00000012440	1568	2080	+
ENSMMUG00000008897	C1RL	Uncharacterized protein [Source:UniProtKB/TrEMBL;Acc:F7DNI9]	ENSMMUT00000012442	1096	1452	+
ENSMMUG00000008899	CLSTN3	Alcadein-beta; Calsyntenin-3; Uncharacterized protein [Source:UniProtKB/TrEMBL;Acc:F7DNG4]	ENSMMUT00000047276	3261	3580	+
ENSMMUG00000004242	PEX5	peroxisomal biogenesis factor 5 [Source:HGNC Symbol;Acc:HGNC:9719]	ENSMMUT00000006018	2931	3094	+
ENSMMUG00000019613	EHMT1	euchromatic histone-lysine N-methyltransferase 1 [Source:HGNC Symbol;Acc:HGNC:24650]	ENSMMUT00000027540	471	790	+
ENSMMUG00000020081	TOE1	Uncharacterized protein [Source:UniProtKB/TrEMBL;Acc:F7GPC3]	ENSMMUT00000028245	1561	1960	+
ENSMMUG00000019610	ZMYND19	Uncharacterized protein; Zinc finger MYND domain-containing protein 19 [Source:UniProtKB/TrEMBL;Acc:F7B823]	ENSMMUT00000027535	1211	1370	+
ENSMMUG00000006221	PRDX1	Peroxiredoxin-1; Uncharacterized protein [Source:UniProtKB/TrEMBL;Acc:F7HLH7]	ENSMMUT00000008701	811	910	+
ENSMMUG00000019607	PNPLA7	Uncharacterized protein [Source:UniProtKB/TrEMBL;Acc:F7B8I9]	ENSMMUT00000027531	4171	4390	+
ENSMMUG00000000439	SLC2A3	Solute carrier family 2, facilitated glucose transporter member 3; Uncharacterized protein [Source:UniProtKB/TrEMBL;Acc:F7A5T7]	ENSMMUT00000047265	2410	2531	+
ENSMMUG00000023431	NASP	nuclear autoantigenic sperm protein (histone-binding) [Source:HGNC Symbol;Acc:HGNC:7644]	ENSMMUT00000047258	2161	2370	+
ENSMMUG00000019605	NELF	Uncharacterized protein [Source:UniProtKB/TrEMBL;Acc:F7B8J7]	ENSMMUT00000047251	1831	2080	+
ENSMMUG00000015253	NECAP1	Adaptin ear-binding coat-associated protein 1; NECAP endocytosis-associated protein 1; Uncharacterized protein [Source:UniProtKB/TrEMBL;Acc:F7DZS2]	ENSMMUT00000021386	491	1060	+
ENSMMUG00000001960	GPBP1L1	Uncharacterized protein; Vasculin-like protein 1 [Source:UniProtKB/TrEMBL;Acc:F6VH41]	ENSMMUT00000002774	2031	2260	+
ENSMMUG00000001831	IPP	Uncharacterized protein [Source:UniProtKB/TrEMBL;Acc:F7GS48]	ENSMMUT00000002576	1681	2040	+
ENSMMUG00000015371	MAST2	microtubule associated serine/threonine kinase 2 [Source:HGNC Symbol;Acc:HGNC:19035]	ENSMMUT00000021572	5491	5718	+
ENSMMUG00000032154	EXD3	Uncharacterized protein [Source:UniProtKB/TrEMBL;Acc:F7GR34]	ENSMMUT00000047238	2541	2660	+
ENSMMUG00000015078	POMGNT1	Protein O-linked-mannose beta-1,2-N-acetylglucosaminyltransferase 1; Uncharacterized protein [Source:UniProtKB/TrEMBL;Acc:F6WVH8]	ENSMMUT00000047232	3241	3446	+
ENSMMUG00000017846	M6PR	Cation-dependent mannose-6-phosphate receptor; Cation-dependent mannose-6-phosphate receptor isoform 1; Uncharacterized protein [Source:UniProtKB/TrEMBL;Acc:F7DKQ6]	ENSMMUT00000025082	2061	2318	+
ENSMMUG00000018107	NDOR1	NADPH dependent diflavin oxidoreductase 1 [Source:HGNC Symbol;Acc:HGNC:29838]	ENSMMUT00000025440	1871	2122	+
ENSMMUG00000005838	LURAP1	NF-kappa-B activator C1orf190; Uncharacterized protein [Source:UniProtKB/TrEMBL;Acc:F6VDA3]	ENSMMUT00000008182	481	700	+
ENSMMUG00000011568	RAD54L	RAD54-like (S. cerevisiae) [Source:HGNC Symbol;Acc:HGNC:9826]	ENSMMUT00000016206	631	780	+
ENSMMUG00000032149	LRRC41	leucine rich repeat containing 41 [Source:HGNC Symbol;Acc:HGNC:16917]	ENSMMUT00000047229	801	930	+
ENSMMUG00000001673	SSNA1	Sjoegren syndrome nuclear autoantigen 1; Uncharacterized protein [Source:UniProtKB/TrEMBL;Acc:F7G3I8]	ENSMMUT00000002371	56	240	+
ENSMMUG00000002717	NSUN4	NOP2/Sun domain family, member 4 [Source:HGNC Symbol;Acc:HGNC:31802]	ENSMMUT00000047228	1471	1690	+
ENSMMUG00000001669	ANAPC2	Anaphase-promoting complex subunit 2; Uncharacterized protein [Source:UniProtKB/TrEMBL;Acc:F7G3J3]	ENSMMUT00000002370	2501	2620	+
ENSMMUG00000002714	FAAH	fatty acid amide hydrolase [Source:HGNC Symbol;Acc:HGNC:3553]	ENSMMUT00000003861	1661	1850	+
ENSMMUG00000022864	DDX11	DEAD/H (Asp-Glu-Ala-Asp/His) box helicase 11 [Source:HGNC Symbol;Acc:HGNC:2736]	ENSMMUT00000032187	3701	3830	+
ENSMMUG00000008036	MAN1B1	mannosidase, alpha, class 1B, member 1 [Source:HGNC Symbol;Acc:HGNC:6823]	ENSMMUT00000047220	2471	2729	+
ENSMMUG00000004863	ATPAF1	Uncharacterized protein [Source:UniProtKB/TrEMBL;Acc:F7AVF1]	ENSMMUT00000006871	869	1182	+
ENSMMUG00000002144		Uncharacterized protein [Source:UniProtKB/TrEMBL;Acc:F6TLI5]	ENSMMUT00000021087	3731	3960	+
ENSMMUG00000004866		Uncharacterized protein [Source:UniProtKB/TrEMBL;Acc:F7AV87]	ENSMMUT00000047214	491	600	+
ENSMMUG00000015297	CD69	Uncharacterized protein [Source:UniProtKB/TrEMBL;Acc:F6QEG7]	ENSMMUT00000021448	611	1173	+
ENSMMUG00000020389	STIL	SCL/TAL1 interrupting locus [Source:HGNC Symbol;Acc:HGNC:10879]	ENSMMUT00000028672	3751	3850	+
ENSMMUG00000017375	CMPK1	Uncharacterized protein [Source:UniProtKB/TrEMBL;Acc:F7GRA8]	ENSMMUT00000024433	438	655	+
ENSMMUG00000011528	FBXW5	Uncharacterized protein [Source:UniProtKB/TrEMBL;Acc:F7C048]	ENSMMUT00000016147	631	840	+
ENSMMUG00000011527	TRAF2	TNF receptor-associated factor 2; Uncharacterized protein [Source:UniProtKB/TrEMBL;Acc:F7C057]	ENSMMUT00000016145	1581	2010	+
ENSMMUG00000005042	RABL6	Uncharacterized protein [Source:UniProtKB/TrEMBL;Acc:F7AJN9]	ENSMMUT00000047189	2051	2356	+
ENSMMUG00000004651		Uncharacterized protein [Source:UniProtKB/TrEMBL;Acc:F7GSH5]	ENSMMUT00000006578	110	221	+
ENSMMUG00000019056	FAF1	Uncharacterized protein [Source:UniProtKB/TrEMBL;Acc:F6QTM2]	ENSMMUT00000026774	2481	2580	+
ENSMMUG00000019057	CDKN2C	Cyclin-dependent kinase 4 inhibitor C; Uncharacterized protein [Source:UniProtKB/TrEMBL;Acc:F6QTJ3]	ENSMMUT00000026777	2131	2320	+
ENSMMUG00000012112	RNF11	RING finger protein 11; Uncharacterized protein [Source:UniProtKB/TrEMBL;Acc:F7H8S3]	ENSMMUT00000016957	491	640	+
ENSMMUG00000005082	MAGOHB	Uncharacterized protein [Source:UniProtKB/TrEMBL;Acc:F7C459]	ENSMMUT00000007169	161	340	+
ENSMMUG00000012055	EPS15	epidermal growth factor receptor pathway substrate 15 [Source:HGNC Symbol;Acc:HGNC:3419]	ENSMMUT00000016881	2461	2660	+
ENSMMUG00000019282		Uncharacterized protein [Source:UniProtKB/TrEMBL;Acc:F6SBG9]	ENSMMUT00000027084	95	222	+
ENSMMUG00000004735	OSBPL9	oxysterol binding protein-like 9 [Source:HGNC Symbol;Acc:HGNC:16386]	ENSMMUT00000006691	1911	2050	+
ENSMMUG00000017022	NOTCH1	Uncharacterized protein [Source:UniProtKB/TrEMBL;Acc:F6Y5M4]	ENSMMUT00000023931	7281	7600	+
ENSMMUG00000004738	NRD1	Uncharacterized protein [Source:UniProtKB/TrEMBL;Acc:F6SU75]	ENSMMUT00000006703	3221	3340	+
ENSMMUG00000018578	LOH12CR1	Uncharacterized protein [Source:UniProtKB/TrEMBL;Acc:F6YFS9]	ENSMMUT00000026112	941	1161	+
ENSMMUG00000018580	DUSP16	dual specificity phosphatase 16 [Source:HGNC Symbol;Acc:HGNC:17909]	ENSMMUT00000026116	1891	2020	+
ENSMMUG00000008822	KTI12	Protein KTI12 homolog; Uncharacterized protein [Source:UniProtKB/TrEMBL;Acc:F7F0W7]	ENSMMUT00000012330	303	570	+
ENSMMUG00000003636		Uncharacterized protein [Source:UniProtKB/TrEMBL;Acc:F6Q5X6]	ENSMMUT00000005151	381	588	+
ENSMMUG00000022370	CDKN1B	Cyclin-dependent kinase inhibitor 1B; Uncharacterized protein [Source:UniProtKB/TrEMBL;Acc:F6Z4R0]	ENSMMUT00000031466	411	940	+
ENSMMUG00000017993	DDX47	DEAD (Asp-Glu-Ala-Asp) box polypeptide 47 [Source:HGNC Symbol;Acc:HGNC:18682]	ENSMMUT00000025281	1733	2146	+
ENSMMUG00000003106	SEC16A	SEC16 homolog A (S. cerevisiae) [Source:HGNC Symbol;Acc:HGNC:29006]	ENSMMUT00000004405	5701	5957	+
ENSMMUG00000014330	ORC1	Uncharacterized protein [Source:UniProtKB/TrEMBL;Acc:F7CZ60]	ENSMMUT00000020110	941	1270	+
ENSMMUG00000014333	PRPF38A	pre-mRNA processing factor 38A [Source:HGNC Symbol;Acc:HGNC:25930]	ENSMMUT00000020113	2021	2170	+
ENSMMUG00000017023	ZCCHC11	zinc finger, CCHC domain containing 11 [Source:HGNC Symbol;Acc:HGNC:28981]	ENSMMUT00000023933	2061	2440	+
ENSMMUG00000003105	INPP5E	inositol polyphosphate-5-phosphatase, 72 kDa [Source:HGNC Symbol;Acc:HGNC:21474]	ENSMMUT00000004393	1	390	+
ENSMMUG00000003098	PMPCA	Mitochondrial-processing peptidase subunit alpha; Uncharacterized protein [Source:UniProtKB/TrEMBL;Acc:F7DRX8]	ENSMMUT00000004388	1541	1800	+
ENSMMUG00000017636	KIAA1467	KIAA1467 [Source:HGNC Symbol;Acc:HGNC:29288]	ENSMMUT00000024797	18	230	+
ENSMMUG00000003086	SNAPC4	small nuclear RNA activating complex, polypeptide 4, 190kDa [Source:HGNC Symbol;Acc:HGNC:11137]	ENSMMUT00000004369	3591	3760	+
ENSMMUG00000003664	ATF7IP	Activating transcription factor 7-interacting protein 1; Uncharacterized protein [Source:UniProtKB/TrEMBL;Acc:F6TC80]	ENSMMUT00000017779	3741	3850	+
ENSMMUG00000001434	ZYG11B	Uncharacterized protein [Source:UniProtKB/TrEMBL;Acc:F7BS01]	ENSMMUT00000002036	1761	1960	+
ENSMMUG00000003083	DNLZ	DNL-type zinc finger [Source:HGNC Symbol;Acc:HGNC:33879]	ENSMMUT00000004363	1	160	+
ENSMMUG00000032120		Peptidyl-prolyl cis-trans isomerase [Source:UniProtKB/TrEMBL;Acc:F6YD24]	ENSMMUT00000047155	384	490	+
ENSMMUG00000015877	GBE1	1,4-alpha-glucan-branching enzyme; Uncharacterized protein [Source:UniProtKB/TrEMBL;Acc:F7C130]	ENSMMUT00000022317	555	780	+
ENSMMUG00000004952	SCP2	sterol carrier protein 2 [Source:HGNC Symbol;Acc:HGNC:10606]	ENSMMUT00000006980	1161	1320	+
ENSMMUG00000019299	WBP11	Uncharacterized protein; WW domain-binding protein 11 [Source:UniProtKB/TrEMBL;Acc:F6S9X4]	ENSMMUT00000027106	1011	1160	+
ENSMMUG00000016827	UBAC1	UBA domain containing 1 [Source:HGNC Symbol;Acc:HGNC:30221]	ENSMMUT00000023643	1201	1420	+
ENSMMUG00000016246	CHMP2B	Charged multivesicular body protein 2b; Uncharacterized protein [Source:UniProtKB/TrEMBL;Acc:F7GEL2]	ENSMMUT00000022826	204	722	+
ENSMMUG00000007606	CPT2	Carnitine O-palmitoyltransferase 2, mitochondrial; Uncharacterized protein [Source:UniProtKB/TrEMBL;Acc:F6SJN6]	ENSMMUT00000010644	2321	2470	+
ENSMMUG00000018032	ARHGDIB	Uncharacterized protein [Source:UniProtKB/TrEMBL;Acc:F7FJ95]	ENSMMUT00000025324	1	140	+
ENSMMUG00000032108		Uncharacterized protein [Source:UniProtKB/TrEMBL;Acc:F6YEF2]	ENSMMUT00000047136	769	960	+
ENSMMUG00000021507	C2H3ORF38	Uncharacterized protein [Source:UniProtKB/TrEMBL;Acc:F7FFW4]	ENSMMUT00000030275	721	1390	+
ENSMMUG00000020334	PROS1	Macaca mulatta protein S (alpha) (PROS1), mRNA. [Source:RefSeq mRNA;Acc:NM_001044726]	ENSMMUT00000028602	2591	2810	+
ENSMMUG00000013307	STRAP	serine/threonine kinase receptor associated protein [Source:HGNC Symbol;Acc:HGNC:30796]	ENSMMUT00000018682	311	530	+
ENSMMUG00000021597	MRPS2	mitochondrial ribosomal protein S2 [Source:HGNC Symbol;Acc:HGNC:14495]	ENSMMUT00000047119	1241	1440	+
ENSMMUG00000003546		Uncharacterized protein [Source:UniProtKB/TrEMBL;Acc:F7EXN3]	ENSMMUT00000005015	411	630	+
ENSMMUG00000001413	YIPF1	Yip1 domain family, member 1 [Source:HGNC Symbol;Acc:HGNC:25231]	ENSMMUT00000047118	1321	1800	+
ENSMMUG00000009549	CLDND1	Uncharacterized protein [Source:UniProtKB/TrEMBL;Acc:F6Y8C4]	ENSMMUT00000013325	131	400	+
ENSMMUG00000010833	CPOX	coproporphyrinogen oxidase [Source:HGNC Symbol;Acc:HGNC:2321]	ENSMMUT00000015150	1371	1510	+
ENSMMUG00000007182	LRRC42	leucine rich repeat containing 42 [Source:HGNC Symbol;Acc:HGNC:28792]	ENSMMUT00000047109	1541	1850	+
ENSMMUG00000007183	TMEM59	Transmembrane protein 59; Uncharacterized protein [Source:UniProtKB/TrEMBL;Acc:F6YT92]	ENSMMUT00000047102	201	300	+
ENSMMUG00000014159		Uncharacterized protein; WD repeat-containing protein 5 [Source:UniProtKB/TrEMBL;Acc:F7AMK0]	ENSMMUT00000019871	951	1300	+
ENSMMUG00000020972	MRPL37	mitochondrial ribosomal protein L37 [Source:HGNC Symbol;Acc:HGNC:14034]	ENSMMUT00000019978	31	140	+
ENSMMUG00000017214	VAV2	vav 2 guanine nucleotide exchange factor [Source:HGNC Symbol;Acc:HGNC:12658]	ENSMMUT00000024200	2981	3120	+
ENSMMUG00000020026	TBC1D23	TBC1 domain family member 23 isoform 2; Uncharacterized protein [Source:UniProtKB/TrEMBL;Acc:F7GGM6]	ENSMMUT00000028144	2309	2420	+
ENSMMUG00000020976	SSBP3	Uncharacterized protein [Source:UniProtKB/TrEMBL;Acc:F7HMU7]	ENSMMUT00000029499	1521	1690	+
ENSMMUG00000020025	TOMM70A	Mitochondrial import receptor subunit TOM70; Uncharacterized protein [Source:UniProtKB/TrEMBL;Acc:F7GGN2]	ENSMMUT00000028143	3331	3450	+
ENSMMUG00000002861	TMEM45A	Transmembrane protein 45A; Uncharacterized protein [Source:UniProtKB/TrEMBL;Acc:F6YZ93]	ENSMMUT00000047091	77	440	+
ENSMMUG00000006754	TTC4	Uncharacterized protein [Source:UniProtKB/TrEMBL;Acc:F6QZ42]	ENSMMUT00000009453	1691	1830	+
ENSMMUG00000002863	TFG	Protein TFG isoform 1; Uncharacterized protein [Source:UniProtKB/TrEMBL;Acc:F7HHW2]	ENSMMUT00000004055	1211	1440	+
ENSMMUG00000010857	RECQL	RecQ helicase-like [Source:HGNC Symbol;Acc:HGNC:9948]	ENSMMUT00000015186	2091	2201	+
ENSMMUG00000010859	GOLT1B	Golgi transport 1-like protein B; Uncharacterized protein [Source:UniProtKB/TrEMBL;Acc:F7G341]	ENSMMUT00000015189	583	874	+
ENSMMUG00000010981	SLC2A6	solute carrier family 2 (facilitated glucose transporter), member 6 [Source:HGNC Symbol;Acc:HGNC:11011]	ENSMMUT00000015361	1	170	+
ENSMMUG00000002679		L-lactate dehydrogenase [Source:UniProtKB/TrEMBL;Acc:F7HQ10]	ENSMMUT00000003817	1291	1400	+
ENSMMUG00000000937	ADAMTS13	ADAM metallopeptidase with thrombospondin type 1 motif, 13 [Source:HGNC Symbol;Acc:HGNC:1366]	ENSMMUT00000001339	4051	4470	+
ENSMMUG00000021577	DHCR24	Delta(24)-sterol reductase; Uncharacterized protein [Source:UniProtKB/TrEMBL;Acc:F7ECX2]	ENSMMUT00000030362	1441	1550	+
ENSMMUG00000005740		Ubiquitin carboxyl-terminal hydrolase [Source:UniProtKB/TrEMBL;Acc:F6TPR6]	ENSMMUT00000047079	4021	4171	+
ENSMMUG00000020808	CMAS	Uncharacterized protein [Source:UniProtKB/TrEMBL;Acc:F7H7Q0]	ENSMMUT00000029276	11	180	+
ENSMMUG00000022348	SURF4	Uncharacterized protein [Source:UniProtKB/TrEMBL;Acc:F6Z001]	ENSMMUT00000031440	1691	1900	+
ENSMMUG00000022344	SURF1	Surfeit locus protein 1; Uncharacterized protein [Source:UniProtKB/TrEMBL;Acc:F6ZCK1]	ENSMMUT00000031436	841	1000	+
ENSMMUG00000017782	PCNP	PEST proteolytic signal-containing nuclear protein; Uncharacterized protein [Source:UniProtKB/TrEMBL;Acc:F6R4G2]	ENSMMUT00000021994	2126	2240	+
ENSMMUG00000006641	C2CD5	C2 calcium-dependent domain containing 5 [Source:HGNC Symbol;Acc:HGNC:29062]	ENSMMUT00000009295	2911	3100	+
ENSMMUG00000015060	ZBTB11	Uncharacterized protein [Source:UniProtKB/TrEMBL;Acc:F6TKM4]	ENSMMUT00000021107	3011	3190	+
ENSMMUG00000015062	CEP97	Uncharacterized protein [Source:UniProtKB/TrEMBL;Acc:F6TKL6]	ENSMMUT00000009163	1211	1560	+
ENSMMUG00000006643	ETNK1	ethanolamine kinase 1 [Source:HGNC Symbol;Acc:HGNC:24649]	ENSMMUT00000009297	1	240	+
ENSMMUG00000021568	NFKBIZ	Uncharacterized protein [Source:UniProtKB/TrEMBL;Acc:F7A0S0]	ENSMMUT00000030353	861	1170	+
ENSMMUG00000022762	OMA1	Uncharacterized protein [Source:UniProtKB/TrEMBL;Acc:F7GCG3]	ENSMMUT00000032031	1511	1690	+
ENSMMUG00000011800	MYSM1	Uncharacterized protein [Source:UniProtKB/TrEMBL;Acc:F7A6Y3]	ENSMMUT00000047056	771	960	+
ENSMMUG00000009107	ALCAM	activated leukocyte cell adhesion molecule [Source:HGNC Symbol;Acc:HGNC:400]	ENSMMUT00000012743	2131	2390	+
ENSMMUG00000015274	RALGDS	ral guanine nucleotide dissociation stimulator [Source:HGNC Symbol;Acc:HGNC:9842]	ENSMMUT00000021415	2291	2890	+
ENSMMUG00000007565	CBLB	Uncharacterized protein [Source:UniProtKB/TrEMBL;Acc:F6T053]	ENSMMUT00000010578	2961	3478	+
ENSMMUG00000008787	BBX	bobby sox homolog (Drosophila) [Source:HGNC Symbol;Acc:HGNC:14422]	ENSMMUT00000012279	1991	2193	+
ENSMMUG00000001267	GTF3C5	general transcription factor IIIC, polypeptide 5, 63kDa [Source:HGNC Symbol;Acc:HGNC:4668]	ENSMMUT00000001797	2181	2370	+
ENSMMUG00000007050			ENSMMUT00000009848	831	947	+
ENSMMUG00000023128	ITPR2	inositol 1,4,5-trisphosphate receptor, type 2 [Source:HGNC Symbol;Acc:HGNC:6181]	ENSMMUT00000047039	8111	8616	+
ENSMMUG00000008791	CD47	Uncharacterized protein [Source:UniProtKB/TrEMBL;Acc:F7A7Y5]	ENSMMUT00000012287	321	606	+
ENSMMUG00000008786	IFT57	Intraflagellar transport protein 57 homolog; Uncharacterized protein [Source:UniProtKB/TrEMBL;Acc:F7F6A6]	ENSMMUT00000012276	1081	1230	+
ENSMMUG00000006466	ASUN	asunder spermatogenesis regulator [Source:HGNC Symbol;Acc:HGNC:20174]	ENSMMUT00000009071	1951	2225	+
ENSMMUG00000009918	TSC1	Hamartin isoform 1; Uncharacterized protein [Source:UniProtKB/TrEMBL;Acc:F6Y6G0]	ENSMMUT00000013850	3501	3720	+
ENSMMUG00000003217	TM7SF3	transmembrane 7 superfamily member 3 [Source:HGNC Symbol;Acc:HGNC:23049]	ENSMMUT00000004558	2431	2600	+
ENSMMUG00000003218	MED21	Mediator of RNA polymerase II transcription subunit 21; Uncharacterized protein [Source:UniProtKB/TrEMBL;Acc:F7EAW2]	ENSMMUT00000004559	371	563	+
ENSMMUG00000023248	STK38L	Serine/threonine-protein kinase 38-like protein; Uncharacterized protein [Source:UniProtKB/TrEMBL;Acc:F7E684]	ENSMMUT00000032696	1291	1983	+
ENSMMUG00000002339	USP1	Ubiquitin carboxyl-terminal hydrolase [Source:UniProtKB/TrEMBL;Acc:F7C644]	ENSMMUT00000003313	1881	2000	+
ENSMMUG00000004590	DDX31	DEAD (Asp-Glu-Ala-Asp) box polypeptide 31 [Source:HGNC Symbol;Acc:HGNC:16715]	ENSMMUT00000047029	531	670	+
ENSMMUG00000000898	DZIP3	DAZ interacting zinc finger protein 3 [Source:HGNC Symbol;Acc:HGNC:30938]	ENSMMUT00000001285	3331	3450	+
ENSMMUG00000018468	SETX	senataxin [Source:HGNC Symbol;Acc:HGNC:445]	ENSMMUT00000025962	7701	7900	+
ENSMMUG00000001727	MED27	Uncharacterized protein [Source:UniProtKB/TrEMBL;Acc:F7GN95]	ENSMMUT00000002437	1041	1240	+
ENSMMUG00000021741	MRPS35	28S ribosomal protein S35, mitochondrial isoform 1; Uncharacterized protein [Source:UniProtKB/TrEMBL;Acc:F7DXV5]	ENSMMUT00000030596	681	910	+
ENSMMUG00000006479	RAPGEF1	Rap guanine nucleotide exchange factor (GEF) 1 [Source:HGNC Symbol;Acc:HGNC:4568]	ENSMMUT00000047017	3121	3280	+
ENSMMUG00000021742	KLHDC5	Uncharacterized protein [Source:UniProtKB/TrEMBL;Acc:F7DXU8]	ENSMMUT00000030598	141	290	+
ENSMMUG00000010531	PTHLH	Uncharacterized protein [Source:UniProtKB/TrEMBL;Acc:F7D665]	ENSMMUT00000014736	341	601	+
ENSMMUG00000020046	ALG6	ALG6, alpha-1,3-glucosyltransferase [Source:HGNC Symbol;Acc:HGNC:23157]	ENSMMUT00000047018	121	310	+
ENSMMUG00000009976	UCK1	Uridine kinase [Source:UniProtKB/TrEMBL;Acc:F6R3B0]	ENSMMUT00000013932	871	1340	+
ENSMMUG00000009975	POMT1	protein-O-mannosyltransferase 1 [Source:HGNC Symbol;Acc:HGNC:9202]	ENSMMUT00000013930	2197	3008	+
ENSMMUG00000015811	ERGIC2	ERGIC and golgi 2 [Source:HGNC Symbol;Acc:HGNC:30208]	ENSMMUT00000022210	1	120	+
ENSMMUG00000016073	GCSAM	germinal center-associated, signaling and motility [Source:HGNC Symbol;Acc:HGNC:20253]	ENSMMUT00000022603	491	610	+
ENSMMUG00000020049	PGM1	Uncharacterized protein [Source:UniProtKB/TrEMBL;Acc:F7G9X6]	ENSMMUT00000028186	1911	2180	+
ENSMMUG00000009973	PRRC2B	proline-rich coiled-coil 2B [Source:HGNC Symbol;Acc:HGNC:28121]	ENSMMUT00000013924	1761	1920	+
ENSMMUG00000001361	IPO8	Importin-8; Importin-8 isoform 1; Uncharacterized protein [Source:UniProtKB/TrEMBL;Acc:F7D6M8]	ENSMMUT00000001925	3131	3688	+
ENSMMUG00000014232	ATG3	Autophagy-related protein 3 [Source:UniProtKB/TrEMBL;Acc:F7D7B0]	ENSMMUT00000019973	701	860	+
ENSMMUG00000001359	CAPRIN2	Uncharacterized protein [Source:UniProtKB/TrEMBL;Acc:F6Y0D5]	ENSMMUT00000046991	3711	3860	+
ENSMMUG00000021278	FAM78A	Putative uncharacterized protein FAM78A; Uncharacterized protein [Source:UniProtKB/TrEMBL;Acc:F6VF69]	ENSMMUT00000029937	1181	1500	+
ENSMMUG00000021724	NUP214	nucleoporin 214kDa [Source:HGNC Symbol;Acc:HGNC:8064]	ENSMMUT00000030575	5061	5250	+
ENSMMUG00000014236	SLC35A5	Putative UDP-sugar transporter protein SLC35A5; Uncharacterized protein [Source:UniProtKB/TrEMBL;Acc:F7D791]	ENSMMUT00000019977	1411	1590	+
ENSMMUG00000018566	JAK1	Tyrosine-protein kinase [Source:UniProtKB/TrEMBL;Acc:F6YLX1]	ENSMMUT00000026100	981	1220	+
ENSMMUG00000003199	CD200R1	Uncharacterized protein [Source:UniProtKB/TrEMBL;Acc:F7EF72]	ENSMMUT00000004532	1221	1392	+
ENSMMUG00000009155	FAM60A	Family with sequence similarity 60, member A; Uncharacterized protein [Source:UniProtKB/TrEMBL;Acc:F7HRP9]	ENSMMUT00000012801	651	790	+
ENSMMUG00000003221	DENND5B	DENN/MADD domain containing 5B [Source:HGNC Symbol;Acc:HGNC:28338]	ENSMMUT00000004564	3791	3900	+
ENSMMUG00000014876	C3orf17	chromosome 3 open reading frame 17 [Source:HGNC Symbol;Acc:HGNC:24496]	ENSMMUT00000020871	1401	1740	+
ENSMMUG00000012499	ABL1	c-abl oncogene 1, non-receptor tyrosine kinase [Source:HGNC Symbol;Acc:HGNC:76]	ENSMMUT00000017534	1871	2090	+
ENSMMUG00000012498	EXOSC2	exosome component 2 [Source:HGNC Symbol;Acc:HGNC:17097]	ENSMMUT00000017529	781	1040	+
ENSMMUG00000007490	PDE4B	Uncharacterized protein [Source:UniProtKB/TrEMBL;Acc:F6QKG3]	ENSMMUT00000010490	1541	2030	+
ENSMMUG00000013655	DNM1L	Dynamin-1-like protein isoform 3; Uncharacterized protein [Source:UniProtKB/TrEMBL;Acc:F7GI50]	ENSMMUT00000046968	2161	2400	+
ENSMMUG00000004200	GPR107	G protein-coupled receptor 107 [Source:HGNC Symbol;Acc:HGNC:17830]	ENSMMUT00000005969	1640	2061	+
ENSMMUG00000003797	USP20	ubiquitin specific peptidase 20 [Source:HGNC Symbol;Acc:HGNC:12619]	ENSMMUT00000005374	3721	3940	+
ENSMMUG00000001943	GRAMD1C	GRAM domain containing 1C [Source:HGNC Symbol;Acc:HGNC:25252]	ENSMMUT00000002752	1961	2120	+
ENSMMUG00000001214	ALG10B	Alpha-1,2-glucosyltransferase ALG10-A; Uncharacterized protein [Source:UniProtKB/TrEMBL;Acc:F7DA70]	ENSMMUT00000001718	806	1080	+
ENSMMUG00000000643	MIER1	mesoderm induction early response 1, transcriptional regulator [Source:HGNC Symbol;Acc:HGNC:29657]	ENSMMUT00000000927	1321	1600	+
ENSMMUG00000003793	TOR1B	torsin family 1, member B (torsin B) [Source:HGNC Symbol;Acc:HGNC:11995]	ENSMMUT00000005366	841	1010	+
ENSMMUG00000011452		39S ribosomal protein L14, mitochondrial; Uncharacterized protein [Source:UniProtKB/TrEMBL;Acc:F7B3S2]	ENSMMUT00000016030	301	420	+
ENSMMUG00000000645	SLC35D1	UDP-glucuronic acid/UDP-N-acetylgalactosamine transporter; Uncharacterized protein [Source:UniProtKB/TrEMBL;Acc:F6XS30]	ENSMMUT00000000931	984	1269	+
ENSMMUG00000011816	ASB6	Uncharacterized protein [Source:UniProtKB/TrEMBL;Acc:F7H7C0]	ENSMMUT00000016551	1361	1860	+
ENSMMUG00000032034		Uncharacterized protein [Source:UniProtKB/TrEMBL;Acc:F7GZM5]	ENSMMUT00000029821	381	617	+
ENSMMUG00000021192	KIF21A	kinesin family member 21A [Source:HGNC Symbol;Acc:HGNC:19349]	ENSMMUT00000029822	2811	2960	+
ENSMMUG00000020640	TIGIT	T cell immunoreceptor with Ig and ITIM domains [Source:HGNC Symbol;Acc:HGNC:26838]	ENSMMUT00000029037	3361	3578	+
ENSMMUG00000006057	METTL11A	Alpha N-terminal protein methyltransferase 1A; Uncharacterized protein [Source:UniProtKB/TrEMBL;Acc:F7HMB4]	ENSMMUT00000046949	741	966	+
ENSMMUG00000002515	PPP2R4	protein phosphatase 2A activator, regulatory subunit 4 [Source:HGNC Symbol;Acc:HGNC:9308]	ENSMMUT00000003575	1	180	+
ENSMMUG00000010443		Non-histone chromosomal protein HMG-17; Uncharacterized protein [Source:UniProtKB/TrEMBL;Acc:F7FJE3]	ENSMMUT00000014609	1	364	+
ENSMMUG00000011767	CRAT	Uncharacterized protein [Source:UniProtKB/TrEMBL;Acc:F7HQL2]	ENSMMUT00000016494	2041	2480	+
ENSMMUG00000032031		Uncharacterized protein [Source:UniProtKB/TrEMBL;Acc:F7HPA0]	ENSMMUT00000046940	281	380	+
ENSMMUG00000000651	IL12RB2	interleukin 12 receptor, beta 2 [Source:HGNC Symbol;Acc:HGNC:5972]	ENSMMUT00000000941	2391	2570	+
ENSMMUG00000000652	SERBP1	Uncharacterized protein [Source:UniProtKB/TrEMBL;Acc:F6WZG6]	ENSMMUT00000000947	802	980	+
ENSMMUG00000015857	LRRK2	Uncharacterized protein [Source:UniProtKB/TrEMBL;Acc:F7C7Z0]	ENSMMUT00000022280	3991	4190	+
ENSMMUG00000012010	TMEM39A	Transmembrane protein 39A; Uncharacterized protein [Source:UniProtKB/TrEMBL;Acc:F7H043]	ENSMMUT00000016822	1681	1885	+
ENSMMUG00000032029		Uncharacterized protein [Source:UniProtKB/TrEMBL;Acc:F7C7E8]	ENSMMUT00000022286	1	110	+
ENSMMUG00000014808	GADD45A	Growth arrest and DNA damage-inducible protein GADD45 alpha isoform 1; Uncharacterized protein [Source:UniProtKB/TrEMBL;Acc:F6W540]	ENSMMUT00000020772	906	1201	+
ENSMMUG00000012012	POGLUT1	Uncharacterized protein [Source:UniProtKB/TrEMBL;Acc:F7GYD9]	ENSMMUT00000016828	1341	1560	+
ENSMMUG00000011757	NUP188	nucleoporin 188kDa [Source:HGNC Symbol;Acc:HGNC:17859]	ENSMMUT00000016474	3461	3600	+
ENSMMUG00000012014	TIMMDC1	translocase of inner mitochondrial membrane domain containing 1 [Source:HGNC Symbol;Acc:HGNC:1321]	ENSMMUT00000016830	861	1150	+
ENSMMUG00000017799	LRRC8A	Leucine-rich repeat-containing protein 8A; Uncharacterized protein [Source:UniProtKB/TrEMBL;Acc:F7E1A8]	ENSMMUT00000025013	2481	2840	+
ENSMMUG00000021848	CCBL1	Uncharacterized protein [Source:UniProtKB/TrEMBL;Acc:F7EI81]	ENSMMUT00000046922	931	1140	+
ENSMMUG00000016367	CD80	Macaca mulatta CD80 molecule (CD80), mRNA. [Source:RefSeq mRNA;Acc:NM_001042642]	ENSMMUT00000046924	1391	1530	+
ENSMMUG00000000900	ADPRH	Uncharacterized protein; [Protein ADP-ribosylarginine] hydrolase [Source:UniProtKB/TrEMBL;Acc:F6REF0]	ENSMMUT00000001286	1721	1840	+
ENSMMUG00000032024		Uncharacterized protein [Source:UniProtKB/TrEMBL;Acc:F7HRH0]	ENSMMUT00000046918	9	225	+
ENSMMUG00000019179	TBC1D13	TBC1 domain family member 13; Uncharacterized protein [Source:UniProtKB/TrEMBL;Acc:F6QZB0]	ENSMMUT00000026947	1141	1320	+
ENSMMUG00000010865	GXYLT1	glucoside xylosyltransferase 1 [Source:HGNC Symbol;Acc:HGNC:27482]	ENSMMUT00000046915	1811	2010	+
ENSMMUG00000010870	ZER1	Protein zer-1 homolog; Uncharacterized protein [Source:UniProtKB/TrEMBL;Acc:F7G019]	ENSMMUT00000015203	3601	3790	+
ENSMMUG00000010146	ZDHHC12	zinc finger, DHHC-type containing 12 [Source:HGNC Symbol;Acc:HGNC:19159]	ENSMMUT00000046910	641	880	+
ENSMMUG00000008532	SET	Uncharacterized protein [Source:UniProtKB/TrEMBL;Acc:F6WIP3]	ENSMMUT00000011927	731	852	+
ENSMMUG00000013852	SRSF11	Serine/arginine-rich splicing factor 11 isoform 1; Uncharacterized protein [Source:UniProtKB/TrEMBL;Acc:F7HTJ5]	ENSMMUT00000046903	2366	2473	+
ENSMMUG00000009333	WDR34	WD repeat domain 34 [Source:HGNC Symbol;Acc:HGNC:28296]	ENSMMUT00000013045	1281	1483	+
ENSMMUG00000001980	GSK3B	glycogen synthase kinase 3 beta [Source:HGNC Symbol;Acc:HGNC:4617]	ENSMMUT00000002798	801	912	+
ENSMMUG00000013853	ANKRD13C	ankyrin repeat domain 13C [Source:HGNC Symbol;Acc:HGNC:25374]	ENSMMUT00000046901	1471	1694	+
ENSMMUG00000000075	LRRC58	Uncharacterized protein [Source:UniProtKB/TrEMBL;Acc:F7HJX5]	ENSMMUT00000000106	1101	1392	+
ENSMMUG00000002925	FSTL1	Follistatin-related protein 1; Uncharacterized protein [Source:UniProtKB/TrEMBL;Acc:F7H1Q5]	ENSMMUT00000004149	781	920	+
ENSMMUG00000001594	RABL3	Rab-like protein 3; Uncharacterized protein [Source:UniProtKB/TrEMBL;Acc:F7GV36]	ENSMMUT00000002254	611	710	+
ENSMMUG00000005989	GLE1	Nucleoporin GLE1 isoform 1; Uncharacterized protein [Source:UniProtKB/TrEMBL;Acc:F6UEL7]	ENSMMUT00000008376	1011	1340	+
ENSMMUG00000017312	ZRANB2	Uncharacterized protein; Zinc finger Ran-binding domain-containing protein 2 isoform 2 [Source:UniProtKB/TrEMBL;Acc:F7HS64]	ENSMMUT00000024335	241	650	+
ENSMMUG00000005987	ODF2	outer dense fiber of sperm tails 2 [Source:HGNC Symbol;Acc:HGNC:8114]	ENSMMUT00000046888	1581	1780	+
ENSMMUG00000001045	IQCB1	Uncharacterized protein [Source:UniProtKB/TrEMBL;Acc:F6QNF6]	ENSMMUT00000001492	1161	1360	+
ENSMMUG00000032020	CERCAM	cerebral endothelial cell adhesion molecule [Source:HGNC Symbol;Acc:HGNC:23723]	ENSMMUT00000046883	1941	2270	+
ENSMMUG00000015962	ARID2	Uncharacterized protein [Source:UniProtKB/TrEMBL;Acc:F6XWD2]	ENSMMUT00000022445	5501	5720	+
ENSMMUG00000014593	CRYZ	Quinone oxidoreductase isoform a; Uncharacterized protein [Source:UniProtKB/TrEMBL;Acc:F7GW27]	ENSMMUT00000046878	1456	1622	+
ENSMMUG00000001049	SLC15A2	Macaca mulatta solute carrier family 15 (H+/peptide transporter), member 2 (SLC15A2), mRNA. [Source:RefSeq mRNA;Acc:NM_001032953]	ENSMMUT00000001496	2141	2570	+
ENSMMUG00000014147	COQ4	coenzyme Q4 [Source:HGNC Symbol;Acc:HGNC:19693]	ENSMMUT00000019857	1	140	+
ENSMMUG00000014146	TRUB2	TruB pseudouridine (psi) synthase family member 2 [Source:HGNC Symbol;Acc:HGNC:17170]	ENSMMUT00000019856	1331	1580	+
ENSMMUG00000023791	SCAF11	SR-related CTD-associated factor 11 [Source:HGNC Symbol;Acc:HGNC:10784]	ENSMMUT00000046876	4481	4698	+
ENSMMUG00000022967	GOLGA2	golgin A2 [Source:HGNC Symbol;Acc:HGNC:4425]	ENSMMUT00000046872	1271	1380	+
ENSMMUG00000011999	SLC38A1	Sodium-coupled neutral amino acid transporter 1; Uncharacterized protein [Source:UniProtKB/TrEMBL;Acc:F7GW54]	ENSMMUT00000046870	2673	2810	+
ENSMMUG00000000873	RABGGTB	Uncharacterized protein [Source:UniProtKB/TrEMBL;Acc:F6TFA1]	ENSMMUT00000001244	781	980	+
ENSMMUG00000022359	SLC38A2	Amino acid transporter A2; Sodium-coupled neutral amino acid transporter 2; Uncharacterized protein [Source:UniProtKB/TrEMBL;Acc:F6Z5M8]	ENSMMUT00000031455	9	629	+
ENSMMUG00000016379	KPNA1	Importin subunit alpha [Source:UniProtKB/TrEMBL;Acc:F7G2W5]	ENSMMUT00000022995	2041	2270	+
ENSMMUG00000016381	PARP9	poly (ADP-ribose) polymerase family, member 9 [Source:HGNC Symbol;Acc:HGNC:24118]	ENSMMUT00000046864	1771	1950	+
ENSMMUG00000007482	RPAP3	RNA polymerase II-associated protein 3 isoform 1; Uncharacterized protein [Source:UniProtKB/TrEMBL;Acc:F6QTD8]	ENSMMUT00000010469	751	940	+
ENSMMUG00000020547	PARP15	poly (ADP-ribose) polymerase family, member 15 [Source:HGNC Symbol;Acc:HGNC:26876]	ENSMMUT00000046861	1511	1650	+
ENSMMUG00000022569	PARP14	Uncharacterized protein [Source:UniProtKB/TrEMBL;Acc:F6ZKI8]	ENSMMUT00000031754	3831	4220	+
ENSMMUG00000020200		Uncharacterized protein [Source:UniProtKB/TrEMBL;Acc:F7BLV1]	ENSMMUT00000028420	489	670	+
ENSMMUG00000022572	HSPBAP1	HSPB (heat shock 27kDa) associated protein 1 [Source:HGNC Symbol;Acc:HGNC:16389]	ENSMMUT00000031757	1281	1590	+
ENSMMUG00000020219	ZZZ3	zinc finger, ZZ-type containing 3 [Source:HGNC Symbol;Acc:HGNC:24523]	ENSMMUT00000028446	1561	1770	+
ENSMMUG00000020628	ARPC5L	Actin-related protein 2/3 complex subunit 5 [Source:UniProtKB/TrEMBL;Acc:F7BM58]	ENSMMUT00000029023	1321	1530	+
ENSMMUG00000011441	TMEM106C	Endoplasmic reticulum membrane protein overexpressed in cancer; Transmembrane protein 106C isoform a; Uncharacterized protein [Source:UniProtKB/TrEMBL;Acc:F7B9V1]	ENSMMUT00000016015	781	1370	+
ENSMMUG00000007702	SEC22A	SEC22 vesicle trafficking protein homolog A (S. cerevisiae) [Source:HGNC Symbol;Acc:HGNC:20260]	ENSMMUT00000010788	755	920	+
ENSMMUG00000007358	PSMB7	Proteasome subunit beta type [Source:UniProtKB/TrEMBL;Acc:F7E9M5]	ENSMMUT00000010282	801	970	+
ENSMMUG00000002350	IFI44	interferon-induced protein 44 [Source:HGNC Symbol;Acc:HGNC:16938]	ENSMMUT00000046846	1401	1594	+
ENSMMUG00000006348	DENND1A	DENN/MADD domain containing 1A [Source:HGNC Symbol;Acc:HGNC:29324]	ENSMMUT00000008907	2321	2450	+
ENSMMUG00000002048	ASB8	Ankyrin repeat and SOCS box protein 8; Uncharacterized protein [Source:UniProtKB/TrEMBL;Acc:F6WXQ9]	ENSMMUT00000002901	541	710	+
ENSMMUG00000032012		Uncharacterized protein [Source:UniProtKB/TrEMBL;Acc:F7H6F6]	ENSMMUT00000046833	51	155	+
ENSMMUG00000020269			ENSMMUT00000028512	361	472	+
ENSMMUG00000008301	CCDC14	coiled-coil domain containing 14 [Source:HGNC Symbol;Acc:HGNC:25766]	ENSMMUT00000011611	2931	3120	+
ENSMMUG00000022919	STRBP	Spermatid perinuclear RNA-binding protein isoform 1; Uncharacterized protein [Source:UniProtKB/TrEMBL;Acc:F6W6A5]	ENSMMUT00000046825	1881	2060	+
ENSMMUG00000003877	C12ORF41	Uncharacterized protein [Source:UniProtKB/TrEMBL;Acc:F7H5U3]	ENSMMUT00000046824	2511	2653	+
ENSMMUG00000000670	RABGAP1	RAB GTPase activating protein 1 [Source:HGNC Symbol;Acc:HGNC:17155]	ENSMMUT00000032260	2651	2920	+
ENSMMUG00000032009	UMPS	Uncharacterized protein; Uridine 5'-monophosphate synthase [Source:UniProtKB/TrEMBL;Acc:F7H6L5]	ENSMMUT00000046818	441	630	+
ENSMMUG00000007629	CCNT1	Cyclin-T1; Uncharacterized protein [Source:UniProtKB/TrEMBL;Acc:F7AQL5]	ENSMMUT00000010683	1861	2000	+
ENSMMUG00000021134	RC3H2	Uncharacterized protein [Source:UniProtKB/TrEMBL;Acc:F7H8K8]	ENSMMUT00000029726	3611	3812	+
ENSMMUG00000008430	CACNB3	Uncharacterized protein; Voltage-dependent L-type calcium channel subunit beta-3 isoform 1 [Source:UniProtKB/TrEMBL;Acc:F6VB97]	ENSMMUT00000011789	1471	1740	+
ENSMMUG00000001168		Uncharacterized protein [Source:UniProtKB/TrEMBL;Acc:F6RHB7]	ENSMMUT00000001649	621	790	+
ENSMMUG00000008432	DDX23	Probable ATP-dependent RNA helicase DDX23; Putative ATP-dependent RNA helicase DDX23; Uncharacterized protein [Source:UniProtKB/TrEMBL;Acc:F6VB85]	ENSMMUT00000011790	131	340	+
ENSMMUG00000003457	PRKACB	Uncharacterized protein [Source:UniProtKB/TrEMBL;Acc:F6QM55]	ENSMMUT00000004886	211	440	+
ENSMMUG00000006971	FKBP11	FK506 binding protein 11, 19 kDa [Source:HGNC Symbol;Acc:HGNC:18624]	ENSMMUT00000009745	541	682	+
ENSMMUG00000011106	SNX4	sorting nexin 4 [Source:HGNC Symbol;Acc:HGNC:11175]	ENSMMUT00000015524	991	1392	+
ENSMMUG00000012882	MRRF	mitochondrial ribosome recycling factor [Source:HGNC Symbol;Acc:HGNC:7234]	ENSMMUT00000046796	1101	1310	+
ENSMMUG00000017125	OSBPL11	oxysterol binding protein-like 11 [Source:HGNC Symbol;Acc:HGNC:16397]	ENSMMUT00000024078	3001	3160	+
ENSMMUG00000015713	PRKAG1	Uncharacterized protein [Source:UniProtKB/TrEMBL;Acc:F6SF90]	ENSMMUT00000022060	1051	1300	+
ENSMMUG00000011455	RBM18	Probable RNA-binding protein 18; Putative RNA-binding protein 18; RNA-binding motif protein 18; Uncharacterized protein [Source:UniProtKB/TrEMBL;Acc:F7B3N2]	ENSMMUT00000016035	1090	1330	+
ENSMMUG00000012847	SLC41A3	Uncharacterized protein [Source:UniProtKB/TrEMBL;Acc:F6TAX3]	ENSMMUT00000046794	1861	2074	+
ENSMMUG00000010127	CTBS	chitobiase, di-N-acetyl- [Source:HGNC Symbol;Acc:HGNC:2496]	ENSMMUT00000014139	1031	1217	+
ENSMMUG00000015718	KMT2D	lysine (K)-specific methyltransferase 2D [Source:HGNC Symbol;Acc:HGNC:7133]	ENSMMUT00000022067	13311	13540	+
ENSMMUG00000015721	RHEBL1	Uncharacterized protein [Source:UniProtKB/TrEMBL;Acc:F6SED7]	ENSMMUT00000022068	971	1110	+
ENSMMUG00000012769	LMBR1L	limb development membrane protein 1-like [Source:HGNC Symbol;Acc:HGNC:18268]	ENSMMUT00000017920	2168	2310	+
ENSMMUG00000015403	MCOLN2	mucolipin 2 [Source:HGNC Symbol;Acc:HGNC:13357]	ENSMMUT00000021593	2381	2520	+
ENSMMUG00000013024	STOM	Uncharacterized protein [Source:UniProtKB/TrEMBL;Acc:F7HP15]	ENSMMUT00000018264	651	860	+
ENSMMUG00000008932	WDR63	WD repeat domain 63 [Source:HGNC Symbol;Acc:HGNC:30711]	ENSMMUT00000046787	2601	2920	+
ENSMMUG00000013020	GSN	gelsolin [Source:HGNC Symbol;Acc:HGNC:4620]	ENSMMUT00000018261	701	850	+
ENSMMUG00000021081	TUBA1B	Uncharacterized protein [Source:UniProtKB/TrEMBL;Acc:F6Y0X7]	ENSMMUT00000046745	1449	1656	+
ENSMMUG00000005595	RAB14	Ras-related protein Rab-14; Uncharacterized protein [Source:UniProtKB/TrEMBL;Acc:F7G3Z8]	ENSMMUT00000007872	641	960	+
ENSMMUG00000010020	C1orf52	chromosome 1 open reading frame 52 [Source:HGNC Symbol;Acc:HGNC:24871]	ENSMMUT00000013987	441	680	+
ENSMMUG00000004195			ENSMMUT00000005958	615	1200	+
ENSMMUG00000017659	FBLN2	fibulin 2 [Source:HGNC Symbol;Acc:HGNC:3601]	ENSMMUT00000024829	2561	2742	+
ENSMMUG00000020123	TRAF1	Epstein-Barr virus-induced protein 6; TNF receptor-associated factor 1 isoform a; Uncharacterized protein [Source:UniProtKB/TrEMBL;Acc:F7GHV4]	ENSMMUT00000028314	1302	1872	+
ENSMMUG00000001646	FBXW2	F-box and WD repeat domain containing 2 [Source:HGNC Symbol;Acc:HGNC:13608]	ENSMMUT00000002327	1121	1270	+
ENSMMUG00000015979	NUP210	Uncharacterized protein [Source:UniProtKB/TrEMBL;Acc:F6XNW1]	ENSMMUT00000022467	6181	6720	+
ENSMMUG00000001342	IQSEC1	Uncharacterized protein [Source:UniProtKB/TrEMBL;Acc:F7B954]	ENSMMUT00000001899	3631	3730	+
ENSMMUG00000013487	SH3GLB1	Uncharacterized protein [Source:UniProtKB/TrEMBL;Acc:F6ZLA9]	ENSMMUT00000018928	1141	1310	+
ENSMMUG00000001340	RPL32	60S ribosomal protein L32; Uncharacterized protein [Source:UniProtKB/TrEMBL;Acc:F7B979]	ENSMMUT00000001896	35	229	+
ENSMMUG00000007450	RAF1	RAF proto-oncogene serine/threonine-protein kinase; Uncharacterized protein [Source:UniProtKB/TrEMBL;Acc:F6SWC0]	ENSMMUT00000010416	2301	2634	+
ENSMMUG00000020588	PKN2	protein kinase N2 [Source:HGNC Symbol;Acc:HGNC:9406]	ENSMMUT00000028962	2591	2870	+
ENSMMUG00000007195	TSEN2	TSEN2 tRNA splicing endonuclease subunit [Source:HGNC Symbol;Acc:HGNC:28422]	ENSMMUT00000010049	411	840	+
ENSMMUG00000002794	GTF2B	Transcription initiation factor IIB; Uncharacterized protein [Source:UniProtKB/TrEMBL;Acc:F7H232]	ENSMMUT00000003964	801	1181	+
ENSMMUG00000019251	GBP3	guanylate binding protein 3 [Source:HGNC Symbol;Acc:HGNC:4184]	ENSMMUT00000027039	1721	1880	+
ENSMMUG00000021806	VGLL4	vestigial-like family member 4 [Source:HGNC Symbol;Acc:HGNC:28966]	ENSMMUT00000030686	3261	3390	+
ENSMMUG00000000662	GBP1	Uncharacterized protein [Source:UniProtKB/TrEMBL;Acc:F7A8B5]	ENSMMUT00000000954	1581	2080	+
ENSMMUG00000000663	GBP6	Uncharacterized protein [Source:UniProtKB/TrEMBL;Acc:F6RNS5]	ENSMMUT00000000957	2471	2570	+
ENSMMUG00000013107	TRIM32	E3 ubiquitin-protein ligase TRIM32; Uncharacterized protein [Source:UniProtKB/TrEMBL;Acc:F6ZUB8]	ENSMMUT00000018383	511	650	+
ENSMMUG00000017707	LRRC8B	Leucine-rich repeat-containing protein 8B; Uncharacterized protein [Source:UniProtKB/TrEMBL;Acc:F6U352]	ENSMMUT00000024887	3131	3360	+
ENSMMUG00000019936	SEC13	SEC13-related protein; Uncharacterized protein [Source:UniProtKB/TrEMBL;Acc:F7GMC8]	ENSMMUT00000046743	1021	1140	+
ENSMMUG00000008003	LRRC8C	Leucine-rich repeat-containing protein 8C; Uncharacterized protein [Source:UniProtKB/TrEMBL;Acc:F7HLE0]	ENSMMUT00000011191	2461	2638	+
ENSMMUG00000003442	ZNF326	Uncharacterized protein; Zinc finger protein 326 isoform 1 [Source:UniProtKB/TrEMBL;Acc:F7F4S6]	ENSMMUT00000004871	1551	1737	+
ENSMMUG00000019933		Uncharacterized protein [Source:UniProtKB/TrEMBL;Acc:F7GMD6]	ENSMMUT00000027999	671	930	+
ENSMMUG00000031981			ENSMMUT00000012203	245	370	+
ENSMMUG00000018290	EMC3	ER membrane protein complex subunit 3 [Source:HGNC Symbol;Acc:HGNC:23999]	ENSMMUT00000025702	631	780	+
ENSMMUG00000009788		Uncharacterized protein [Source:UniProtKB/TrEMBL;Acc:F7DXF0]	ENSMMUT00000030600	1201	1340	+
ENSMMUG00000002029			ENSMMUT00000015005	471	602	+
ENSMMUG00000018285	CRELD1	Uncharacterized protein [Source:UniProtKB/TrEMBL;Acc:F7GW64]	ENSMMUT00000025698	1831	2060	+
ENSMMUG00000004900	C15H9ORF91	Uncharacterized protein [Source:UniProtKB/TrEMBL;Acc:F7CJG5]	ENSMMUT00000006920	1721	1910	+
ENSMMUG00000004899	ATP6V1G1	ATPase, H+ transporting, lysosomal 13kDa, V1 subunit G1 [Source:HGNC Symbol;Acc:HGNC:864]	ENSMMUT00000006919	17	370	+
ENSMMUG00000011010	CDC7	Cell division cycle 7-related protein kinase; Uncharacterized protein [Source:UniProtKB/TrEMBL;Acc:F7GQW8]	ENSMMUT00000015393	1297	1687	+
ENSMMUG00000007544	TROAP	Trophinin-associated protein; Uncharacterized protein [Source:UniProtKB/TrEMBL;Acc:F6T807]	ENSMMUT00000010554	1641	1770	+
ENSMMUG00000018281	IL17RE	interleukin 17 receptor E [Source:HGNC Symbol;Acc:HGNC:18439]	ENSMMUT00000025690	2024	2210	+
ENSMMUG00000008018	AKNA	AT-hook transcription factor [Source:HGNC Symbol;Acc:HGNC:24108]	ENSMMUT00000011218	4551	4650	+
ENSMMUG00000003762	SPATS2	spermatogenesis associated, serine-rich 2 [Source:HGNC Symbol;Acc:HGNC:18650]	ENSMMUT00000005324	101	370	+
ENSMMUG00000018280	JAGN1	jagunal homolog 1 (Drosophila) [Source:HGNC Symbol;Acc:HGNC:26926]	ENSMMUT00000025687	641	1030	+
ENSMMUG00000010095	GLMN	glomulin, FKBP associated protein [Source:HGNC Symbol;Acc:HGNC:14373]	ENSMMUT00000014091	21	150	+
ENSMMUG00000010628	RPUSD3	RNA pseudouridylate synthase domain containing 3 [Source:HGNC Symbol;Acc:HGNC:28437]	ENSMMUT00000005013	881	1220	+
ENSMMUG00000006114	TADA3	Transcriptional adapter 3 isoform a; Transcriptional adapter 3-like protein; Uncharacterized protein [Source:UniProtKB/TrEMBL;Acc:F7B699]	ENSMMUT00000008547	241	370	+
ENSMMUG00000022498	FMNL3	Uncharacterized protein [Source:UniProtKB/TrEMBL;Acc:F6YW64]	ENSMMUT00000031644	1091	1230	+
ENSMMUG00000005068	GFI1	Uncharacterized protein; Zinc finger protein Gfi-1 [Source:UniProtKB/TrEMBL;Acc:F7C4S3]	ENSMMUT00000007148	2311	2580	+
ENSMMUG00000005960	TMBIM6	Bax inhibitor 1; Uncharacterized protein [Source:UniProtKB/TrEMBL;Acc:F7GWD0]	ENSMMUT00000008344	781	890	+
ENSMMUG00000006117	OGG1	Uncharacterized protein [Source:UniProtKB/TrEMBL;Acc:F7B0C2]	ENSMMUT00000046703	11	180	+
ENSMMUG00000005075			ENSMMUT00000007157	21	136	+
ENSMMUG00000016808	MTF2	Uncharacterized protein [Source:UniProtKB/TrEMBL;Acc:F7CTR3]	ENSMMUT00000046698	1691	2115	+
ENSMMUG00000006116	BRPF1	bromodomain and PHD finger containing, 1 [Source:HGNC Symbol;Acc:HGNC:14255]	ENSMMUT00000008551	1021	1290	+
ENSMMUG00000021689	RACGAP1	Rac GTPase-activating protein 1; Uncharacterized protein [Source:UniProtKB/TrEMBL;Acc:F7F0L1]	ENSMMUT00000030517	221	340	+
ENSMMUG00000007808	MTMR14	myotubularin related protein 14 [Source:HGNC Symbol;Acc:HGNC:26190]	ENSMMUT00000010937	1971	2209	+
ENSMMUG00000005844	PRPF4	U4/U6 small nuclear ribonucleoprotein Prp4; Uncharacterized protein [Source:UniProtKB/TrEMBL;Acc:F6TT32]	ENSMMUT00000008195	1871	2020	+
ENSMMUG00000006531	SMARCD1	SWI/SNF-related matrix-associated actin-dependent regulator of chromatin subfamily D member 1 isoform a; Uncharacterized protein [Source:UniProtKB/TrEMBL;Acc:F7HTX9]	ENSMMUT00000009155	375	620	+
ENSMMUG00000011197	SLC31A1	Copper transporter 1; High affinity copper uptake protein 1; Uncharacterized protein [Source:UniProtKB/TrEMBL;Acc:F6USX2]	ENSMMUT00000015665	731	880	+
ENSMMUG00000016818	DR1	Protein Dr1; Uncharacterized protein [Source:UniProtKB/TrEMBL;Acc:F7C9G1]	ENSMMUT00000023633	691	1030	+
ENSMMUG00000000173	FKBP15	FK506 binding protein 15, 133kDa [Source:HGNC Symbol;Acc:HGNC:23397]	ENSMMUT00000000257	3881	4090	+
ENSMMUG00000016471	CERS5	ceramide synthase 5 [Source:HGNC Symbol;Acc:HGNC:23749]	ENSMMUT00000023135	1571	1970	+
ENSMMUG00000003943	SETD5	Uncharacterized protein [Source:UniProtKB/TrEMBL;Acc:F6ZMI9]	ENSMMUT00000005591	4001	4700	+
ENSMMUG00000015048	LIMA1	LIM domain and actin binding 1 [Source:HGNC Symbol;Acc:HGNC:24636]	ENSMMUT00000021093	391	520	+
ENSMMUG00000017307	THUMPD3	THUMP domain containing 3 [Source:HGNC Symbol;Acc:HGNC:24493]	ENSMMUT00000046669	2101	2260	+
ENSMMUG00000008172	LARP4	La ribonucleoprotein domain family, member 4 [Source:HGNC Symbol;Acc:HGNC:24320]	ENSMMUT00000046660	1911	2415	+
ENSMMUG00000000464	ROD1	Uncharacterized protein [Source:UniProtKB/TrEMBL;Acc:F6YQQ9]	ENSMMUT00000000686	1411	1660	+
ENSMMUG00000020013	RAD18	RAD18 homolog (S. cerevisiae) [Source:HGNC Symbol;Acc:HGNC:18278]	ENSMMUT00000028126	1411	1620	+
ENSMMUG00000021526	UGCG	Ceramide glucosyltransferase; Uncharacterized protein [Source:UniProtKB/TrEMBL;Acc:F7FBF7]	ENSMMUT00000030297	1561	1687	+
ENSMMUG00000010565	DIP2B	DIP2 disco-interacting protein 2 homolog B (Drosophila) [Source:HGNC Symbol;Acc:HGNC:29284]	ENSMMUT00000046650	4501	4760	+
ENSMMUG00000008807	EDEM1	ER degradation-enhancing alpha-mannosidase-like 1; Uncharacterized protein [Source:UniProtKB/TrEMBL;Acc:F7F1M7]	ENSMMUT00000012313	3511	3621	+
ENSMMUG00000008810		ADP-ribosylation factor-like protein 8B; Uncharacterized protein [Source:UniProtKB/TrEMBL;Acc:F7F1D7]	ENSMMUT00000012317	2471	2630	+
ENSMMUG00000023304	GNG10	Guanine nucleotide-binding protein subunit gamma [Source:UniProtKB/TrEMBL;Acc:F7FAQ9]	ENSMMUT00000032787	531	710	+
ENSMMUG00000014588	BHLHE40	Class E basic helix-loop-helix protein 40; Uncharacterized protein [Source:UniProtKB/TrEMBL;Acc:F7GRJ4]	ENSMMUT00000020459	1291	1515	+
ENSMMUG00000031946		Uncharacterized protein [Source:UniProtKB/TrEMBL;Acc:F7HDZ0]	ENSMMUT00000046649	4	111	+
ENSMMUG00000012095	ATF1	Cyclic AMP-dependent transcription factor ATF-1; Uncharacterized protein [Source:UniProtKB/TrEMBL;Acc:F7HB38]	ENSMMUT00000016937	781	972	+
ENSMMUG00000018485	METTL7A	Methyltransferase-like protein 7A; Uncharacterized protein [Source:UniProtKB/TrEMBL;Acc:F6X1K2]	ENSMMUT00000025992	1	140	+
ENSMMUG00000022961	SLC11A2	Natural resistance-associated macrophage protein 2 isoform 1; Uncharacterized protein [Source:UniProtKB/TrEMBL;Acc:F6U6C6]	ENSMMUT00000046646	2597	3557	+
ENSMMUG00000014013	ABCD3	ATP-binding cassette, sub-family D (ALD), member 3 [Source:HGNC Symbol;Acc:HGNC:67]	ENSMMUT00000019668	1571	1790	+
ENSMMUG00000016315	KIAA0368	KIAA0368 [Source:HGNC Symbol;Acc:HGNC:29020]	ENSMMUT00000022916	3541	3680	+
ENSMMUG00000012453	LETMD1	LETM1 domain containing 1 [Source:HGNC Symbol;Acc:HGNC:24241]	ENSMMUT00000017460	1971	2120	+
ENSMMUG00000016130	PTBP2	Uncharacterized protein [Source:UniProtKB/TrEMBL;Acc:F7FQK5]	ENSMMUT00000022677	1603	1811	+
ENSMMUG00000012457	CSRNP2	cysteine-serine-rich nuclear protein 2 [Source:HGNC Symbol;Acc:HGNC:16006]	ENSMMUT00000017463	1471	1720	+
ENSMMUG00000004734	SUMF1	sulfatase modifying factor 1 [Source:HGNC Symbol;Acc:HGNC:20376]	ENSMMUT00000006685	1041	1292	+
ENSMMUG00000000152	TFCP2	Uncharacterized protein [Source:UniProtKB/TrEMBL;Acc:F7HG29]	ENSMMUT00000046624	1101	1290	+
ENSMMUG00000009425	ACTB	Uncharacterized protein [Source:UniProtKB/TrEMBL;Acc:F6X9G9]	ENSMMUT00000013155	1112	1360	+
ENSMMUG00000000695	TMEM245	transmembrane protein 245 [Source:HGNC Symbol;Acc:HGNC:1363]	ENSMMUT00000000995	2531	2904	+
ENSMMUG00000016388	FRRS1	ferric-chelate reductase 1 [Source:HGNC Symbol;Acc:HGNC:27622]	ENSMMUT00000023009	1771	1900	+
ENSMMUG00000021441	AGL	amylo-alpha-1, 6-glucosidase, 4-alpha-glucanotransferase [Source:HGNC Symbol;Acc:HGNC:321]	ENSMMUT00000046612	4031	4380	+
ENSMMUG00000000931	SLC35A3	Uncharacterized protein [Source:UniProtKB/TrEMBL;Acc:F6R6U5]	ENSMMUT00000046611	2521	2639	+
ENSMMUG00000004238	HIAT1	hippocampus abundant transcript 1 [Source:HGNC Symbol;Acc:HGNC:23363]	ENSMMUT00000006013	1381	1845	+
ENSMMUG00000016959	PPP4R2	protein phosphatase 4, regulatory subunit 2 [Source:HGNC Symbol;Acc:HGNC:18296]	ENSMMUT00000023827	1341	1550	+
ENSMMUG00000022507	GXYLT2	glucoside xylosyltransferase 2 [Source:HGNC Symbol;Acc:HGNC:33383]	ENSMMUT00000031656	881	1020	+
ENSMMUG00000009571		Uncharacterized protein [Source:UniProtKB/TrEMBL;Acc:F6X5F4]	ENSMMUT00000013352	1331	1560	+
ENSMMUG00000015392	C11H12ORF44	Uncharacterized protein [Source:UniProtKB/TrEMBL;Acc:F6S8V3]	ENSMMUT00000046599	981	1320	+
ENSMMUG00000007128	RYBP	Uncharacterized protein [Source:UniProtKB/TrEMBL;Acc:F7DTJ9]	ENSMMUT00000009941	3091	3330	+
ENSMMUG00000019357	IKBKAP	inhibitor of kappa light polypeptide gene enhancer in B-cells, kinase complex-associated protein [Source:HGNC Symbol;Acc:HGNC:5959]	ENSMMUT00000027191	3991	4210	+
ENSMMUG00000002889	FOXP1	Uncharacterized protein [Source:UniProtKB/TrEMBL;Acc:F7HDF9]	ENSMMUT00000011204	2571	2690	+
ENSMMUG00000007706	DBT	Lipoamide acyltransferase component of branched-chain alpha-keto acid dehydrogenase complex, mitochondrial; Uncharacterized protein [Source:UniProtKB/TrEMBL;Acc:F7C9Y3]	ENSMMUT00000010791	1391	1520	+
ENSMMUG00000019105	RTCA	RNA 3'-terminal phosphate cyclase [Source:HGNC Symbol;Acc:HGNC:17981]	ENSMMUT00000026849	1365	1494	+
ENSMMUG00000014944	RAD23B	RAD23 homolog B (S. cerevisiae) [Source:HGNC Symbol;Acc:HGNC:9813]	ENSMMUT00000020955	1261	1480	+
ENSMMUG00000022906	VCAM1	Uncharacterized protein [Source:UniProtKB/TrEMBL;Acc:F6W7H7]	ENSMMUT00000032245	2363	2590	+
ENSMMUG00000002669	FCMD	Fukutin isoform a; Uncharacterized protein [Source:UniProtKB/TrEMBL;Acc:F7H2P6]	ENSMMUT00000003802	1281	1380	+
ENSMMUG00000003728	SLC30A7	Uncharacterized protein; Zinc transporter 7 [Source:UniProtKB/TrEMBL;Acc:F6S235]	ENSMMUT00000005275	1011	1280	+
ENSMMUG00000015024	SLC44A1	solute carrier family 44 (choline transporter), member 1 [Source:HGNC Symbol;Acc:HGNC:18798]	ENSMMUT00000021065	3762	4164	+
ENSMMUG00000003730	DPH5	diphthamide biosynthesis 5 [Source:HGNC Symbol;Acc:HGNC:24270]	ENSMMUT00000005277	661	843	+
ENSMMUG00000020608	ABCA1	Uncharacterized protein [Source:UniProtKB/TrEMBL;Acc:F7BTN9]	ENSMMUT00000028999	6011	6180	+
ENSMMUG00000008627	ARL6IP5	PRA1 family protein 3; Uncharacterized protein [Source:UniProtKB/TrEMBL;Acc:F7FCU0]	ENSMMUT00000012063	518	1000	+
ENSMMUG00000008620	UBA3	Uncharacterized protein [Source:UniProtKB/TrEMBL;Acc:F7FCV2]	ENSMMUT00000012059	1331	1430	+
ENSMMUG00000020463	SMC2	Uncharacterized protein [Source:UniProtKB/TrEMBL;Acc:F6VS74]	ENSMMUT00000046564	2741	2990	+
ENSMMUG00000009693	SUCLG2	Uncharacterized protein [Source:UniProtKB/TrEMBL;Acc:F6Y3N7]	ENSMMUT00000013533	1281	1400	+
ENSMMUG00000004081	KBTBD8	Uncharacterized protein [Source:UniProtKB/TrEMBL;Acc:F6ZJ59]	ENSMMUT00000005790	1231	1700	+
ENSMMUG00000016670	RNF20	E3 ubiquitin-protein ligase BRE1A; Uncharacterized protein [Source:UniProtKB/TrEMBL;Acc:F6VU61]	ENSMMUT00000023429	3031	3270	+
ENSMMUG00000001531	LRIG1	leucine-rich repeats and immunoglobulin-like domains 1 [Source:HGNC Symbol;Acc:HGNC:17360]	ENSMMUT00000002164	2481	3040	+
ENSMMUG00000001529	SLC25A26	Uncharacterized protein [Source:UniProtKB/TrEMBL;Acc:F7GC43]	ENSMMUT00000046558	701	986	+
ENSMMUG00000023797	C9ORF125	Transmembrane protein C9orf125; Uncharacterized protein [Source:UniProtKB/TrEMBL;Acc:F7HRC5]	ENSMMUT00000033487	1781	1950	+
ENSMMUG00000006802	PRMT6	Protein arginine N-methyltransferase 6; Uncharacterized protein [Source:UniProtKB/TrEMBL;Acc:F7H1A9]	ENSMMUT00000009512	981	1200	+
ENSMMUG00000001526	TEX10	Testis-expressed sequence 10 protein; Uncharacterized protein [Source:UniProtKB/TrEMBL;Acc:F7GC51]	ENSMMUT00000002156	1	910	+
ENSMMUG00000000329	SPRYD3	SPRY domain containing 3 [Source:HGNC Symbol;Acc:HGNC:25920]	ENSMMUT00000000483	1014	1270	+
ENSMMUG00000001509	PSMD6	26S proteasome non-ATPase regulatory subunit 6; Uncharacterized protein [Source:UniProtKB/TrEMBL;Acc:F7GFM2]	ENSMMUT00000046530	1751	1930	+
ENSMMUG00000011415	ERP44	endoplasmic reticulum protein 44 [Source:HGNC Symbol;Acc:HGNC:18311]	ENSMMUT00000015983	481	594	+
ENSMMUG00000011414	STX17	Syntaxin-17; Uncharacterized protein [Source:UniProtKB/TrEMBL;Acc:F6VSJ7]	ENSMMUT00000015982	1471	2080	+
ENSMMUG00000005245	ITGB7	integrin, beta 7 [Source:HGNC Symbol;Acc:HGNC:6162]	ENSMMUT00000007384	2071	2360	+
ENSMMUG00000010662	ALG2	Uncharacterized protein [Source:UniProtKB/TrEMBL;Acc:F7B4R0]	ENSMMUT00000014910	961	1090	+
ENSMMUG00000010155	PRPF38B	Pre-mRNA-splicing factor 38B; Uncharacterized protein [Source:UniProtKB/TrEMBL;Acc:F6QPW1]	ENSMMUT00000014178	1067	1940	+
ENSMMUG00000022021	ESPL1	extra spindle pole bodies homolog 1 (S. cerevisiae) [Source:HGNC Symbol;Acc:HGNC:16856]	ENSMMUT00000030991	4341	4670	+
ENSMMUG00000019561	GALNT12	Uncharacterized protein [Source:UniProtKB/TrEMBL;Acc:F7BMV2]	ENSMMUT00000027480	1661	1898	+
ENSMMUG00000018523	ANKS6	Uncharacterized protein [Source:UniProtKB/TrEMBL;Acc:F7A2F6]	ENSMMUT00000026043	3241	3360	+
ENSMMUG00000015672	PDHB	Pyruvate dehydrogenase E1 component subunit beta, mitochondrial isoform 1; Uncharacterized protein [Source:UniProtKB/TrEMBL;Acc:F6R4J1]	ENSMMUT00000046499	231	340	+
ENSMMUG00000006608		Uncharacterized protein [Source:UniProtKB/TrEMBL;Acc:F6QDF0]	ENSMMUT00000009244	381	545	+
ENSMMUG00000031892			ENSMMUT00000046502	780	1057	+
ENSMMUG00000009265	WDR47	WD repeat domain 47 [Source:HGNC Symbol;Acc:HGNC:29141]	ENSMMUT00000012951	2991	3170	+
ENSMMUG00000012242	ANP32B	Acidic leucine-rich nuclear phosphoprotein 32 family member B; Uncharacterized protein [Source:UniProtKB/TrEMBL;Acc:F6V8C0]	ENSMMUT00000017143	401	740	+
ENSMMUG00000002841		Uncharacterized protein [Source:UniProtKB/TrEMBL;Acc:F7H2H7]	ENSMMUT00000004027	541	993	+
ENSMMUG00000006613	MAP3K12	Mitogen-activated protein kinase kinase kinase 12 isoform 2; Uncharacterized protein [Source:UniProtKB/TrEMBL;Acc:F7HKE5]	ENSMMUT00000009252	2161	2340	+
ENSMMUG00000006315	ABHD6	Uncharacterized protein [Source:UniProtKB/TrEMBL;Acc:F7HIR3]	ENSMMUT00000046489	1471	1790	+
ENSMMUG00000018492	TARBP2	TAR (HIV-1) RNA binding protein 2 [Source:HGNC Symbol;Acc:HGNC:11569]	ENSMMUT00000026007	1461	1719	+
ENSMMUG00000021837	SARS	seryl-tRNA synthetase [Source:HGNC Symbol;Acc:HGNC:10537]	ENSMMUT00000030726	381	640	+
ENSMMUG00000012281	NCBP1	80 kDa nuclear cap-binding protein; Uncharacterized protein [Source:UniProtKB/TrEMBL;Acc:F7DRW1]	ENSMMUT00000017202	1937	2170	+
ENSMMUG00000012279	TSTD2	Uncharacterized protein [Source:UniProtKB/TrEMBL;Acc:F7DS33]	ENSMMUT00000017200	1331	1540	+
ENSMMUG00000016241	ATP5G1	Uncharacterized protein [Source:UniProtKB/TrEMBL;Acc:F7GGY3]	ENSMMUT00000046480	621	732	+
ENSMMUG00000009457	CALCOCO1	Uncharacterized protein [Source:UniProtKB/TrEMBL;Acc:F7AA22]	ENSMMUT00000046479	1181	1390	+
ENSMMUG00000005813	PSMA5	Proteasome subunit alpha type [Source:UniProtKB/TrEMBL;Acc:F6VLE9]	ENSMMUT00000008148	691	900	+
ENSMMUG00000004800	SLMAP	Uncharacterized protein [Source:UniProtKB/TrEMBL;Acc:F6S6L4]	ENSMMUT00000046475	1341	1490	+
ENSMMUG00000005815	ATXN7L2	Uncharacterized protein [Source:UniProtKB/TrEMBL;Acc:F6VLC1]	ENSMMUT00000008151	1571	1790	+
ENSMMUG00000008670	SHB	Uncharacterized protein [Source:UniProtKB/TrEMBL;Acc:F7DQX6]	ENSMMUT00000012122	1	200	+
ENSMMUG00000008667	DCAF10	DDB1 and CUL4 associated factor 10 [Source:HGNC Symbol;Acc:HGNC:23686]	ENSMMUT00000012115	1411	1620	+
ENSMMUG00000004950	CBX5	Chromobox protein homolog 5; Heterochromatin protein 1-like protein alpha; Uncharacterized protein [Source:UniProtKB/TrEMBL;Acc:F7C841]	ENSMMUT00000046471	581	710	+
ENSMMUG00000008665	EXOSC3	Exosome complex component RRP40 isoform 1; Uncharacterized protein [Source:UniProtKB/TrEMBL;Acc:F7F3T0]	ENSMMUT00000012112	771	960	+
ENSMMUG00000005818	GNAI3	Guanine nucleotide-binding protein G(K) subunit alpha; Uncharacterized protein [Source:UniProtKB/TrEMBL;Acc:F6VL43]	ENSMMUT00000008155	1191	1480	+
ENSMMUG00000012989	HNRNPA1	heterogeneous nuclear ribonucleoprotein A1 [Source:HGNC Symbol;Acc:HGNC:5031]	ENSMMUT00000018222	871	1040	+
ENSMMUG00000018619	DENND6A	DENN/MADD domain containing 6A [Source:HGNC Symbol;Acc:HGNC:26635]	ENSMMUT00000026175	1681	2100	+
ENSMMUG00000005182	COPZ1	Uncharacterized protein [Source:UniProtKB/TrEMBL;Acc:F7CYT2]	ENSMMUT00000007296	711	870	+
ENSMMUG00000017887	TOMM5	Uncharacterized protein [Source:UniProtKB/TrEMBL;Acc:F7F1V2]	ENSMMUT00000025137	341	500	+
ENSMMUG00000018617	ARF4	ADP-ribosylation factor 4; Uncharacterized protein [Source:UniProtKB/TrEMBL;Acc:F6XZM8]	ENSMMUT00000026172	691	860	+
ENSMMUG00000017886	FBXO10	F-box protein 10 [Source:HGNC Symbol;Acc:HGNC:13589]	ENSMMUT00000025134	3361	3590	+
ENSMMUG00000017892	POLR1E	polymerase (RNA) I polypeptide E, 53kDa [Source:HGNC Symbol;Acc:HGNC:17631]	ENSMMUT00000025144	1101	1250	+
ENSMMUG00000017894	ZBTB5	Uncharacterized protein; Zinc finger and BTB domain-containing protein 5 [Source:UniProtKB/TrEMBL;Acc:F7F1G9]	ENSMMUT00000025145	431	670	+
ENSMMUG00000007421	ZCCHC7	Uncharacterized protein; Zinc finger CCHC domain-containing protein 7 [Source:UniProtKB/TrEMBL;Acc:F6SX56]	ENSMMUT00000010378	2421	2580	+
ENSMMUG00000000108	NCKAP1L	NCK-associated protein 1-like [Source:HGNC Symbol;Acc:HGNC:4862]	ENSMMUT00000000158	3517	3685	+
ENSMMUG00000019630	GSTM4	Uncharacterized protein [Source:UniProtKB/TrEMBL;Acc:F6VK76]	ENSMMUT00000027574	51	160	+
ENSMMUG00000003782	MELK	maternal embryonic leucine zipper kinase [Source:HGNC Symbol;Acc:HGNC:16870]	ENSMMUT00000005354	1801	2010	+
ENSMMUG00000010163	ARHGEF3	Rho guanine nucleotide exchange factor (GEF) 3 [Source:HGNC Symbol;Acc:HGNC:683]	ENSMMUT00000046452	2681	2924	+
ENSMMUG00000006135	GNE	glucosamine (UDP-N-acetyl)-2-epimerase/N-acetylmannosamine kinase [Source:HGNC Symbol;Acc:HGNC:23657]	ENSMMUT00000008576	2031	2326	+
ENSMMUG00000002820	FAM208A	Uncharacterized protein [Source:UniProtKB/TrEMBL;Acc:F7H086]	ENSMMUT00000003993	4441	4630	+
ENSMMUG00000016203	KIAA0748	Uncharacterized protein [Source:UniProtKB/TrEMBL;Acc:F7FPM2]	ENSMMUT00000022768	1061	1190	+
ENSMMUG00000002017		Uncharacterized protein [Source:UniProtKB/TrEMBL;Acc:F6TMP5]	ENSMMUT00000002858	821	930	+
ENSMMUG00000031865			ENSMMUT00000046442	323	550	+
ENSMMUG00000016339	TMEM8B	Uncharacterized protein [Source:UniProtKB/TrEMBL;Acc:F7GRK6]	ENSMMUT00000022944	1071	1220	+
ENSMMUG00000019272	SELK	Macaca mulatta selenoprotein K (SELK), mRNA. [Source:RefSeq mRNA;Acc:NM_001159381]	ENSMMUT00000027069	441	570	+
ENSMMUG00000019269	ACTR8	Uncharacterized protein [Source:UniProtKB/TrEMBL;Acc:F6SI88]	ENSMMUT00000027064	1701	2050	+
ENSMMUG00000016337	HINT2	Histidine triad nucleotide-binding protein 2, mitochondrial; Uncharacterized protein [Source:UniProtKB/TrEMBL;Acc:F7GRL0]	ENSMMUT00000046437	841	940	+
ENSMMUG00000013228	RDH5	11-cis retinol dehydrogenase; Uncharacterized protein [Source:UniProtKB/TrEMBL;Acc:F6XEV1]	ENSMMUT00000018557	1081	1230	+
ENSMMUG00000022715	AHCYL1	Uncharacterized protein [Source:UniProtKB/TrEMBL;Acc:F7GIM7]	ENSMMUT00000031968	2331	2500	+
ENSMMUG00000005426	STRIP1	striatin interacting protein 1 [Source:HGNC Symbol;Acc:HGNC:25916]	ENSMMUT00000007635	2231	2740	+
ENSMMUG00000006292	ORMDL2	ORM1-like 2 (S. cerevisiae) [Source:HGNC Symbol;Acc:HGNC:16037]	ENSMMUT00000008810	1	100	+
ENSMMUG00000006293	DNAJC14	DnaJ (Hsp40) homolog, subfamily C, member 14 [Source:HGNC Symbol;Acc:HGNC:24581]	ENSMMUT00000008812	701	900	+
ENSMMUG00000016333	RGP1	Retrograde Golgi transport protein RGP1 homolog; Uncharacterized protein [Source:UniProtKB/TrEMBL;Acc:F7GRM3]	ENSMMUT00000022937	1191	1380	+
ENSMMUG00000016331	GBA2	glucosidase, beta (bile acid) 2 [Source:HGNC Symbol;Acc:HGNC:18986]	ENSMMUT00000046426	3294	3600	+
ENSMMUG00000011208	DCP1A	Uncharacterized protein; mRNA-decapping enzyme 1A [Source:UniProtKB/TrEMBL;Acc:F6UKG6]	ENSMMUT00000015679	1811	1990	+
ENSMMUG00000018814	DGKA	Uncharacterized protein [Source:UniProtKB/TrEMBL;Acc:F6ZHF9]	ENSMMUT00000046425	2541	2677	+
ENSMMUG00000015020	RBM15	Uncharacterized protein [Source:UniProtKB/TrEMBL;Acc:F6V5M6]	ENSMMUT00000021058	2511	2770	+
ENSMMUG00000031856	TLN1	talin 1 [Source:HGNC Symbol;Acc:HGNC:11845]	ENSMMUT00000046424	7322	8030	+
ENSMMUG00000015023	HBXIP	Uncharacterized protein [Source:UniProtKB/TrEMBL;Acc:F6V595]	ENSMMUT00000021062	239	370	+
ENSMMUG00000016197	RFT1	RFT1 homolog (S. cerevisiae) [Source:HGNC Symbol;Acc:HGNC:30220]	ENSMMUT00000022755	2281	2500	+
ENSMMUG00000000811	CD53	CD53 molecule [Source:HGNC Symbol;Acc:HGNC:1686]	ENSMMUT00000001175	931	1310	+
ENSMMUG00000016323	ARHGEF39	Rho guanine nucleotide exchange factor (GEF) 39 [Source:HGNC Symbol;Acc:HGNC:25909]	ENSMMUT00000046416	1181	1631	+
ENSMMUG00000002463	DRAM2	DNA damage-regulated autophagy modulator protein 2; Uncharacterized protein [Source:UniProtKB/TrEMBL;Acc:F7HGZ0]	ENSMMUT00000003506	961	1200	+
ENSMMUG00000016327	CCDC107	coiled-coil domain containing 107 [Source:HGNC Symbol;Acc:HGNC:28465]	ENSMMUT00000022930	636	790	+
ENSMMUG00000002461	CEPT1	Choline/ethanolaminephosphotransferase 1; Uncharacterized protein [Source:UniProtKB/TrEMBL;Acc:F7HL54]	ENSMMUT00000003505	1	431	+
ENSMMUG00000018817	CDK2	cyclin-dependent kinase 2 [Source:HGNC Symbol;Acc:HGNC:1771]	ENSMMUT00000026459	1019	1300	+
ENSMMUG00000016319	SIT1	Signaling threshold-regulating transmembrane adapter 1; Suppression-inducing transmembrane adapter 1; Uncharacterized protein [Source:UniProtKB/TrEMBL;Acc:F7GT19]	ENSMMUT00000022917	601	890	+
ENSMMUG00000016316	TESK1	Dual specificity testis-specific protein kinase 1; Uncharacterized protein [Source:UniProtKB/TrEMBL;Acc:F7GT25]	ENSMMUT00000022914	2051	2417	+
ENSMMUG00000007519			ENSMMUT00000010518	1631	1790	+
ENSMMUG00000017042		40S ribosomal protein S26; Uncharacterized protein [Source:UniProtKB/TrEMBL;Acc:F7HQQ4]	ENSMMUT00000023957	485	651	+
ENSMMUG00000002164	PA2G4	Uncharacterized protein [Source:UniProtKB/TrEMBL;Acc:F6U975]	ENSMMUT00000046387	1481	1630	+
ENSMMUG00000003311	WDR77	Methylosome protein 50; Uncharacterized protein [Source:UniProtKB/TrEMBL;Acc:F7EL45]	ENSMMUT00000004682	1931	2078	+
ENSMMUG00000012526	GLT8D1	Glycosyltransferase 8 domain-containing protein 1; Uncharacterized protein [Source:UniProtKB/TrEMBL;Acc:F7ECP8]	ENSMMUT00000046388	1021	1543	+
ENSMMUG00000003313	ATP5F1	ATP synthase subunit b, mitochondrial; Uncharacterized protein [Source:UniProtKB/TrEMBL;Acc:F7EHQ1]	ENSMMUT00000004684	591	909	+
ENSMMUG00000011864	STOML2	Stomatin-like protein 2; Uncharacterized protein [Source:UniProtKB/TrEMBL;Acc:F7H2K5]	ENSMMUT00000016624	611	860	+
ENSMMUG00000021979	ESYT1	Extended synaptotagmin-1 isoform 2; Uncharacterized protein [Source:UniProtKB/TrEMBL;Acc:F6RSH0]	ENSMMUT00000030926	4051	4183	+
ENSMMUG00000012511	GNL3	guanine nucleotide binding protein-like 3 (nucleolar) [Source:HGNC Symbol;Acc:HGNC:29931]	ENSMMUT00000017554	1311	1470	+
ENSMMUG00000017361	PBRM1	Uncharacterized protein [Source:UniProtKB/TrEMBL;Acc:F7H6U8]	ENSMMUT00000024425	4941	5066	+
ENSMMUG00000020191	FANCG	Fanconi anemia group G protein; Uncharacterized protein [Source:UniProtKB/TrEMBL;Acc:F6WT79]	ENSMMUT00000028406	1	170	+
ENSMMUG00000014489	DDX20	DEAD (Asp-Glu-Ala-Asp) box polypeptide 20 [Source:HGNC Symbol;Acc:HGNC:2743]	ENSMMUT00000020325	2501	2940	+
ENSMMUG00000031837	C3ORF78	Uncharacterized protein [Source:UniProtKB/TrEMBL;Acc:F7HNE3]	ENSMMUT00000046379	221	320	+
ENSMMUG00000020190	VCP	Uncharacterized protein [Source:UniProtKB/TrEMBL;Acc:F6WT88]	ENSMMUT00000046375	2601	2900	+
ENSMMUG00000008273	SMARCC2	SWI/SNF related, matrix associated, actin dependent regulator of chromatin, subfamily c, member 2 [Source:HGNC Symbol;Acc:HGNC:11105]	ENSMMUT00000011570	2331	2560	+
ENSMMUG00000021981	RNF41	E3 ubiquitin-protein ligase NRDP1; E3 ubiquitin-protein ligase NRDP1 isoform 1; Uncharacterized protein [Source:UniProtKB/TrEMBL;Acc:F6RSF7]	ENSMMUT00000046371	1761	1920	+
ENSMMUG00000005619	NISCH	nischarin [Source:HGNC Symbol;Acc:HGNC:18006]	ENSMMUT00000007901	4043	4350	+
ENSMMUG00000031834	COQ10A	coenzyme Q10 homolog A (S. cerevisiae) [Source:HGNC Symbol;Acc:HGNC:26515]	ENSMMUT00000046370	971	1080	+
ENSMMUG00000002483	CS	citrate synthase [Source:HGNC Symbol;Acc:HGNC:2422]	ENSMMUT00000003531	2831	2936	+
ENSMMUG00000013271	CNPY2	MIR-interacting saposin-like protein; Protein canopy homolog 2 isoform 1; Uncharacterized protein [Source:UniProtKB/TrEMBL;Acc:F6Z678]	ENSMMUT00000018635	1031	1200	+
ENSMMUG00000013482	PAN2	PAB-dependent poly(A)-specific ribonuclease subunit 2 isoform 3; Uncharacterized protein [Source:UniProtKB/TrEMBL;Acc:F6ZLF2]	ENSMMUT00000046364	4421	4661	+
ENSMMUG00000016982	BAP1	BRCA1 associated protein-1 (ubiquitin carboxy-terminal hydrolase) [Source:HGNC Symbol;Acc:HGNC:950]	ENSMMUT00000023865	3321	3490	+
ENSMMUG00000000803	STAT2	Signal transducer and activator of transcription 2 isoform 1; Uncharacterized protein; p113 [Source:UniProtKB/TrEMBL;Acc:F6R1P6]	ENSMMUT00000001167	2321	2640	+
ENSMMUG00000020774	SIGMAR1	Uncharacterized protein [Source:UniProtKB/TrEMBL;Acc:F7HC79]	ENSMMUT00000029221	601	940	+
ENSMMUG00000021878	TIMELESS	timeless circadian clock [Source:HGNC Symbol;Acc:HGNC:11813]	ENSMMUT00000030782	3511	3770	+
ENSMMUG00000008234	WDR82	Uncharacterized protein; WD repeat-containing protein 82 [Source:UniProtKB/TrEMBL;Acc:F7HSB5]	ENSMMUT00000011508	925	1372	+
ENSMMUG00000000860	GLS2	Uncharacterized protein [Source:UniProtKB/TrEMBL;Acc:F6TFZ2]	ENSMMUT00000046354	2181	2583	+
ENSMMUG00000015668	CAPZA1	Uncharacterized protein [Source:UniProtKB/TrEMBL;Acc:F6R5F1]	ENSMMUT00000021985	751	870	+
ENSMMUG00000015670	MOV10	Uncharacterized protein [Source:UniProtKB/TrEMBL;Acc:F6R595]	ENSMMUT00000046352	4101	4310	+
ENSMMUG00000019332	BAZ2A	bromodomain adjacent to zinc finger domain, 2A [Source:HGNC Symbol;Acc:HGNC:962]	ENSMMUT00000027154	5851	5960	+
ENSMMUG00000012485	POC1A	Uncharacterized protein [Source:UniProtKB/TrEMBL;Acc:F7FAV6]	ENSMMUT00000017502	1511	1720	+
ENSMMUG00000006171	SLC16A1	Monocarboxylate transporter 1; Uncharacterized protein [Source:UniProtKB/TrEMBL;Acc:F7HQX2]	ENSMMUT00000008638	1681	1830	+
ENSMMUG00000019098	LRIG2	leucine-rich repeats and immunoglobulin-like domains 2 [Source:HGNC Symbol;Acc:HGNC:20889]	ENSMMUT00000026841	3521	3761	+
ENSMMUG00000013766	MMU.4022	Prostaglandin E synthase 3; Uncharacterized protein [Source:UniProtKB/TrEMBL;Acc:F6Q847]	ENSMMUT00000019329	631	840	+
ENSMMUG00000005300	DUSP7	Dual specificity protein phosphatase [Source:UniProtKB/TrEMBL;Acc:F7GK32]	ENSMMUT00000007458	1331	1456	+
ENSMMUG00000031826	UBAP1	Ubiquitin-associated protein 1; Ubiquitin-associated protein 1 isoform 1; Uncharacterized protein [Source:UniProtKB/TrEMBL;Acc:F7H7K7]	ENSMMUT00000046343	1111	1240	+
ENSMMUG00000019248		60S ribosomal protein L29; Uncharacterized protein [Source:UniProtKB/TrEMBL;Acc:F6QGB0]	ENSMMUT00000027035	531	695	+
ENSMMUG00000000542	HSD17B6	17-beta-hydroxysteroid dehydrogenase type 6; Uncharacterized protein [Source:UniProtKB/TrEMBL;Acc:F7A368]	ENSMMUT00000000788	251	410	+
ENSMMUG00000019657	ABHD14B	Macaca mulatta abhydrolase domain containing 14B (ABHD14B), mRNA. [Source:RefSeq mRNA;Acc:NM_001171865]	ENSMMUT00000027612	1701	1800	+
ENSMMUG00000019658	ABHD14A	Abhydrolase domain-containing protein 14A; Uncharacterized protein [Source:UniProtKB/TrEMBL;Acc:F7CNR2]	ENSMMUT00000027618	841	1060	+
ENSMMUG00000017458	DCAF12	DDB1 and CUL4 associated factor 12 [Source:HGNC Symbol;Acc:HGNC:19911]	ENSMMUT00000024551	3191	3349	+
ENSMMUG00000022205	PCBP4	Uncharacterized protein [Source:UniProtKB/TrEMBL;Acc:F6Z9M6]	ENSMMUT00000031236	2081	2240	+
ENSMMUG00000017819	PHTF1	Uncharacterized protein [Source:UniProtKB/TrEMBL;Acc:F7DW84]	ENSMMUT00000046336	1181	1560	+
ENSMMUG00000012597	UBAP2	ubiquitin associated protein 2 [Source:HGNC Symbol;Acc:HGNC:14185]	ENSMMUT00000017667	3151	3310	+
ENSMMUG00000017823	RSBN1	Uncharacterized protein [Source:UniProtKB/TrEMBL;Acc:F7DVS5]	ENSMMUT00000025046	1921	2309	+
ENSMMUG00000019783	TMEM194A	Transmembrane protein 194A; Uncharacterized protein [Source:UniProtKB/TrEMBL;Acc:F7G5G8]	ENSMMUT00000027808	4571	4710	+
ENSMMUG00000006786	PTPN22	Uncharacterized protein [Source:UniProtKB/TrEMBL;Acc:F7H1I7]	ENSMMUT00000046334	1331	1650	+
ENSMMUG00000003644	RRP9	Uncharacterized protein [Source:UniProtKB/TrEMBL;Acc:F6PY48]	ENSMMUT00000005161	13	422	+
ENSMMUG00000017527	STAT6	Signal transducer and activator of transcription 6 isoform 1; Uncharacterized protein [Source:UniProtKB/TrEMBL;Acc:F6UMM2]	ENSMMUT00000024650	3831	3930	+
ENSMMUG00000000389	NOL6	Uncharacterized protein [Source:UniProtKB/TrEMBL;Acc:F6X5R1]	ENSMMUT00000000568	3614	3889	+
ENSMMUG00000019528	AP4B1	adaptor-related protein complex 4, beta 1 subunit [Source:HGNC Symbol;Acc:HGNC:572]	ENSMMUT00000027431	2081	2393	+
ENSMMUG00000012002	RAD54L2	RAD54-like 2 (S. cerevisiae) [Source:HGNC Symbol;Acc:HGNC:29123]	ENSMMUT00000016810	4641	4770	+
ENSMMUG00000021535	HIPK1	homeodomain interacting protein kinase 1 [Source:HGNC Symbol;Acc:HGNC:19006]	ENSMMUT00000030307	5451	5600	+
ENSMMUG00000004280	VPRBP	Vpr (HIV-1) binding protein [Source:HGNC Symbol;Acc:HGNC:30911]	ENSMMUT00000006085	4050	4460	+
ENSMMUG00000004278	MANF	Uncharacterized protein [Source:UniProtKB/TrEMBL;Acc:F6ZSK8]	ENSMMUT00000006082	411	590	+
ENSMMUG00000010495	MAPKAPK3	MAP kinase-activated protein kinase 3; Uncharacterized protein [Source:UniProtKB/TrEMBL;Acc:F7BFL2]	ENSMMUT00000014687	1621	1920	+
ENSMMUG00000020149	CHMP5	Charged multivesicular body protein 5 isoform 1; Chromatin-modifying protein 5; Uncharacterized protein [Source:UniProtKB/TrEMBL;Acc:F6TSB3]	ENSMMUT00000028350	591	840	+
ENSMMUG00000021789	R3HDM2	Uncharacterized protein [Source:UniProtKB/TrEMBL;Acc:F7DE77]	ENSMMUT00000030661	2555	2930	+
ENSMMUG00000010498	HEMK1	HemK methyltransferase family member 1 [Source:HGNC Symbol;Acc:HGNC:24923]	ENSMMUT00000014691	361	510	+
ENSMMUG00000020148	BAG1	BCL2-associated athanogene [Source:HGNC Symbol;Acc:HGNC:937]	ENSMMUT00000046312	641	780	+
ENSMMUG00000014620	TRIM33	Uncharacterized protein [Source:UniProtKB/TrEMBL;Acc:F7GNF8]	ENSMMUT00000020503	3301	3457	+
ENSMMUG00000022060	ARHGAP9	Uncharacterized protein [Source:UniProtKB/TrEMBL;Acc:F7HP48]	ENSMMUT00000031047	2511	2669	+
ENSMMUG00000007740	DNAJA1	DnaJ homolog subfamily A member 1; Uncharacterized protein [Source:UniProtKB/TrEMBL;Acc:F7C2X2]	ENSMMUT00000010841	1301	1430	+
ENSMMUG00000011277	MARS	Uncharacterized protein [Source:UniProtKB/TrEMBL;Acc:F6WA55]	ENSMMUT00000015780	2461	2748	+
ENSMMUG00000007724	APTX	Uncharacterized protein [Source:UniProtKB/TrEMBL;Acc:F7C3I2]	ENSMMUT00000010833	1201	1340	+
ENSMMUG00000007013	NPRL2	nitrogen permease regulator-like 2 (S. cerevisiae) [Source:HGNC Symbol;Acc:HGNC:24969]	ENSMMUT00000009806	1441	1649	+
ENSMMUG00000011286	DDIT3	DNA damage-inducible transcript 3 protein; Uncharacterized protein [Source:UniProtKB/TrEMBL;Acc:F6WA37]	ENSMMUT00000015789	491	690	+
ENSMMUG00000011289	MBD6	methyl-CpG binding domain protein 6 [Source:HGNC Symbol;Acc:HGNC:20445]	ENSMMUT00000015791	2041	2200	+
ENSMMUG00000011292	DCTN2	dynactin 2 (p50) [Source:HGNC Symbol;Acc:HGNC:2712]	ENSMMUT00000046301	261	540	+
ENSMMUG00000006996	RASSF1	Uncharacterized protein [Source:UniProtKB/TrEMBL;Acc:F7DJY8]	ENSMMUT00000009778	1771	1870	+
ENSMMUG00000002686	TOPORS	Uncharacterized protein [Source:UniProtKB/TrEMBL;Acc:F7H9W6]	ENSMMUT00000003826	2421	2750	+
ENSMMUG00000012442	DDX58	Macaca mulatta DEAD (Asp-Glu-Ala-Asp) box polypeptide 58 (DDX58), mRNA. [Source:RefSeq mRNA;Acc:NM_001042668]	ENSMMUT00000017446	2721	3033	+
ENSMMUG00000006995	TUSC2	Tumor suppressor candidate 2; Uncharacterized protein [Source:UniProtKB/TrEMBL;Acc:F7DQ08]	ENSMMUT00000009771	1341	1540	+
ENSMMUG00000008196	ACO1	Cytoplasmic aconitate hydratase; Uncharacterized protein [Source:UniProtKB/TrEMBL;Acc:F7GYH7]	ENSMMUT00000046296	1891	2090	+
ENSMMUG00000020120	NAT6	N-acetyltransferase 6 (GCN5-related) [Source:HGNC Symbol;Acc:HGNC:30252]	ENSMMUT00000028307	1531	1710	+
ENSMMUG00000020119	IFRD2	Uncharacterized protein [Source:UniProtKB/TrEMBL;Acc:F7GI34]	ENSMMUT00000028306	1841	1940	+
ENSMMUG00000016508	C15H9ORF72	Putative uncharacterized protein C9orf72; Uncharacterized protein [Source:UniProtKB/TrEMBL;Acc:F7G0U4]	ENSMMUT00000023188	411	585	+
ENSMMUG00000006080	TEK	Uncharacterized protein [Source:UniProtKB/TrEMBL;Acc:F6VW02]	ENSMMUT00000008498	3561	3750	+
ENSMMUG00000020116	GNAI2	Uncharacterized protein [Source:UniProtKB/TrEMBL;Acc:F7FD32]	ENSMMUT00000028300	1741	1920	+
ENSMMUG00000008151	ATP1A1	Uncharacterized protein [Source:UniProtKB/TrEMBL;Acc:F7HE84]	ENSMMUT00000011389	3351	3550	+
ENSMMUG00000001182	B4GALNT1	Beta-1,4 N-acetylgalactosaminyltransferase 1; Uncharacterized protein [Source:UniProtKB/TrEMBL;Acc:F6R9K4]	ENSMMUT00000001675	4811	4940	+
ENSMMUG00000020710	OS9	Uncharacterized protein [Source:UniProtKB/TrEMBL;Acc:F6PTF4]	ENSMMUT00000029133	2111	2230	+
ENSMMUG00000006074	PLAA	Phospholipase A-2-activating protein; Uncharacterized protein [Source:UniProtKB/TrEMBL;Acc:F6VW58]	ENSMMUT00000008493	2311	2580	+
ENSMMUG00000004921	RBM5	RNA-binding protein 5; Uncharacterized protein [Source:UniProtKB/TrEMBL;Acc:F7CDY6]	ENSMMUT00000006944	2141	2360	+
ENSMMUG00000023690	AGAP2	Arf-GAP with GTPase, ANK repeat and PH domain-containing protein 2 isoform PIKE-S; Uncharacterized protein [Source:UniProtKB/TrEMBL;Acc:F7HCX8]	ENSMMUT00000033343	3511	3680	+
ENSMMUG00000016905	TTF2	transcription termination factor, RNA polymerase II [Source:HGNC Symbol;Acc:HGNC:12398]	ENSMMUT00000023746	1751	1930	+
ENSMMUG00000006073	CAAP1	Uncharacterized protein [Source:UniProtKB/TrEMBL;Acc:F6W2I1]	ENSMMUT00000008491	791	1040	+
ENSMMUG00000023691	TSPAN31	Tetraspanin-31; Uncharacterized protein [Source:UniProtKB/TrEMBL;Acc:F7HCX5]	ENSMMUT00000033346	1001	1136	+
ENSMMUG00000001137	MTAP	S-methyl-5'-thioadenosine phosphorylase [Source:UniProtKB/Swiss-Prot;Acc:F6RQL9]	ENSMMUT00000001605	981	1270	+
ENSMMUG00000021685	MAN1A2	mannosidase, alpha, class 1A, member 2 [Source:HGNC Symbol;Acc:HGNC:6822]	ENSMMUT00000030511	2581	2977	+
ENSMMUG00000022143	2015-03-09	Uncharacterized protein [Source:UniProtKB/TrEMBL;Acc:F7H3B9]	ENSMMUT00000031146	1191	1560	+
ENSMMUG00000010959	KLHL9	kelch-like family member 9 [Source:HGNC Symbol;Acc:HGNC:18732]	ENSMMUT00000015335	1431	1710	+
ENSMMUG00000004907	FAM46C	Uncharacterized protein [Source:UniProtKB/TrEMBL;Acc:F7CJC7]	ENSMMUT00000006929	1231	1420	+
ENSMMUG00000022148	METTL1	Uncharacterized protein; tRNA (Guanine-N(7)-)-methyltransferase isoform a [Source:UniProtKB/TrEMBL;Acc:F7H363]	ENSMMUT00000031157	831	1262	+
ENSMMUG00000008513	WDR3	Uncharacterized protein [Source:UniProtKB/TrEMBL;Acc:F6WR72]	ENSMMUT00000011907	3281	3417	+
ENSMMUG00000019070	FOCAD	focadhesin [Source:HGNC Symbol;Acc:HGNC:23377]	ENSMMUT00000012459	5301	5674	+
ENSMMUG00000005893	TSFM	Elongation factor Ts, mitochondrial [Source:UniProtKB/TrEMBL;Acc:F6TKZ4]	ENSMMUT00000046256	913	1160	+
ENSMMUG00000014589	IP6K1	Inositol hexakisphosphate kinase 1 isoform 1; Uncharacterized protein [Source:UniProtKB/TrEMBL;Acc:F7GRE2]	ENSMMUT00000020464	4361	4469	+
ENSMMUG00000014584	GMPPB	Mannose-1-phosphate guanyltransferase beta isoform 2; Uncharacterized protein [Source:UniProtKB/TrEMBL;Acc:F7GRE3]	ENSMMUT00000020460	1401	1630	+
ENSMMUG00000005321	CTDSP2	CTD (carboxy-terminal domain, RNA polymerase II, polypeptide A) small phosphatase 2 [Source:HGNC Symbol;Acc:HGNC:17077]	ENSMMUT00000007489	1031	1685	+
ENSMMUG00000022929	GEMIN7	gem (nuclear organelle) associated protein 7 [Source:HGNC Symbol;Acc:HGNC:20045]	ENSMMUT00000032273	261	390	+
ENSMMUG00000019218	XRCC6BP1	Uncharacterized protein [Source:UniProtKB/TrEMBL;Acc:F6QPF2]	ENSMMUT00000026995	468	640	+
ENSMMUG00000008325	MLLT3	Uncharacterized protein [Source:UniProtKB/TrEMBL;Acc:F7HSZ1]	ENSMMUT00000011644	871	1040	+
ENSMMUG00000014564	RNF123	ring finger protein 123 [Source:HGNC Symbol;Acc:HGNC:21148]	ENSMMUT00000020450	3861	4020	+
ENSMMUG00000009260	WARS2	tryptophanyl tRNA synthetase 2, mitochondrial [Source:HGNC Symbol;Acc:HGNC:12730]	ENSMMUT00000012941	631	990	+
ENSMMUG00000003412			ENSMMUT00000004827	1091	1287	+
ENSMMUG00000000955	USP15	Ubiquitin carboxyl-terminal hydrolase [Source:UniProtKB/TrEMBL;Acc:F6QY38]	ENSMMUT00000001366	2691	3035	+
ENSMMUG00000004338	DENND4C	DENN/MADD domain containing 4C [Source:HGNC Symbol;Acc:HGNC:26079]	ENSMMUT00000046240	4861	5000	+
ENSMMUG00000023089	PHGDH	phosphoglycerate dehydrogenase [Source:HGNC Symbol;Acc:HGNC:8923]	ENSMMUT00000046237	1821	1930	+
ENSMMUG00000000956	MON2	MON2 homolog (S. cerevisiae) [Source:HGNC Symbol;Acc:HGNC:29177]	ENSMMUT00000001368	3867	4230	+
ENSMMUG00000018396	HAUS6	Uncharacterized protein [Source:UniProtKB/TrEMBL;Acc:F7GZC3]	ENSMMUT00000025855	2871	3320	+
ENSMMUG00000011561	TMEM5	transmembrane protein 5 [Source:HGNC Symbol;Acc:HGNC:13530]	ENSMMUT00000016189	281	430	+
ENSMMUG00000018395	RRAGA	Uncharacterized protein [Source:UniProtKB/TrEMBL;Acc:F7GZF7]	ENSMMUT00000025851	151	430	+
ENSMMUG00000001955	C11H12ORF66	Uncharacterized protein [Source:UniProtKB/TrEMBL;Acc:F6VH90]	ENSMMUT00000002768	721	1460	+
ENSMMUG00000018375	NOTCH2	Uncharacterized protein [Source:UniProtKB/TrEMBL;Acc:F7DFJ1]	ENSMMUT00000025824	7634	8110	+
ENSMMUG00000014540	APEH	Acylamino-acid-releasing enzyme; Uncharacterized protein [Source:UniProtKB/TrEMBL;Acc:F7G744]	ENSMMUT00000020403	2625	2779	+
ENSMMUG00000002664			ENSMMUT00000016990	1185	1305	+
ENSMMUG00000007659	XPOT	exportin, tRNA [Source:HGNC Symbol;Acc:HGNC:12826]	ENSMMUT00000046231	1941	2250	+
ENSMMUG00000012707	SEC22B	Uncharacterized protein; Vesicle-trafficking protein SEC22b [Source:UniProtKB/TrEMBL;Acc:F7DJM1]	ENSMMUT00000017815	801	930	+
ENSMMUG00000004683	DAG1	Dystroglycan preproprotein; Uncharacterized protein [Source:UniProtKB/TrEMBL;Acc:F6RU72]	ENSMMUT00000006615	3071	3470	+
ENSMMUG00000007658	TBK1	Serine/threonine-protein kinase TBK1; Uncharacterized protein [Source:UniProtKB/TrEMBL;Acc:F7DBZ3]	ENSMMUT00000010727	1661	1870	+
ENSMMUG00000031778		Uncharacterized protein [Source:UniProtKB/TrEMBL;Acc:F6VZC4]	ENSMMUT00000015968	261	370	+
ENSMMUG00000019640	GPR89B	Golgi pH regulator B; Uncharacterized protein [Source:UniProtKB/TrEMBL;Acc:F7D013]	ENSMMUT00000027588	1393	1669	+
ENSMMUG00000012963	GPX1	Macaca mulatta glutathione peroxidase 1 (GPX1), mRNA. [Source:RefSeq mRNA;Acc:NM_001159298]	ENSMMUT00000018173	736	850	+
ENSMMUG00000000822	USP4	ubiquitin specific peptidase 4 (proto-oncogene) [Source:HGNC Symbol;Acc:HGNC:12627]	ENSMMUT00000001187	2821	2990	+
ENSMMUG00000006481	GNS	N-acetylglucosamine-6-sulfatase; Uncharacterized protein [Source:UniProtKB/TrEMBL;Acc:F7HBI0]	ENSMMUT00000009088	1844	2090	+
ENSMMUG00000016736	RNF115	Uncharacterized protein [Source:UniProtKB/TrEMBL;Acc:F6V5Y8]	ENSMMUT00000023511	963	1228	+
ENSMMUG00000016892	LEMD3	Inner nuclear membrane protein Man1 isoform 1; Uncharacterized protein [Source:UniProtKB/TrEMBL;Acc:F7CQM6]	ENSMMUT00000023726	2601	2784	+
ENSMMUG00000002833	KLHDC8B	Uncharacterized protein [Source:UniProtKB/TrEMBL;Acc:F7H011]	ENSMMUT00000004012	1821	1940	+
ENSMMUG00000016735	POLR3C	Uncharacterized protein [Source:UniProtKB/TrEMBL;Acc:F6V621]	ENSMMUT00000023509	1641	1835	+
ENSMMUG00000002836	CCDC71	Coiled-coil domain-containing protein 71; Uncharacterized protein [Source:UniProtKB/TrEMBL;Acc:F7GYC2]	ENSMMUT00000004016	701	900	+
ENSMMUG00000016621	TMBIM4	Uncharacterized protein [Source:UniProtKB/TrEMBL;Acc:F6TPJ2]	ENSMMUT00000023356	591	844	+
ENSMMUG00000002948	USP19	ubiquitin specific peptidase 19 [Source:HGNC Symbol;Acc:HGNC:12617]	ENSMMUT00000004176	1471	1640	+
ENSMMUG00000031768	RPL17	ribosomal protein L17 [Source:HGNC Symbol;Acc:HGNC:10307]	ENSMMUT00000046206	441	540	+
ENSMMUG00000008300	CAND1	Cullin-associated NEDD8-dissociated protein 1; Cullin-associated and neddylation-dissociated protein 1; Uncharacterized protein [Source:UniProtKB/TrEMBL;Acc:F7H6Z9]	ENSMMUT00000011609	3921	4144	+
ENSMMUG00000005656	IMPDH2	Inosine-5'-monophosphate dehydrogenase [Source:UniProtKB/TrEMBL;Acc:F6VXT4]	ENSMMUT00000007958	511	870	+
ENSMMUG00000011650	DYRK2	Uncharacterized protein [Source:UniProtKB/TrEMBL;Acc:F6PSZ0]	ENSMMUT00000016324	1861	2020	+
ENSMMUG00000002920		Uncharacterized protein [Source:UniProtKB/TrEMBL;Acc:F6PTJ8]	ENSMMUT00000004143	391	521	+
ENSMMUG00000005649	WDR6	Uncharacterized protein [Source:UniProtKB/TrEMBL;Acc:F6W4V1]	ENSMMUT00000007942	3291	3430	+
ENSMMUG00000018725	MDM1	Uncharacterized protein [Source:UniProtKB/TrEMBL;Acc:F6YB04]	ENSMMUT00000026320	1361	1590	+
ENSMMUG00000006130	P4HTM	prolyl 4-hydroxylase, transmembrane (endoplasmic reticulum) [Source:HGNC Symbol;Acc:HGNC:28858]	ENSMMUT00000008569	1491	1640	+
ENSMMUG00000016051	RBM8A	RNA binding motif protein 8A [Source:HGNC Symbol;Acc:HGNC:9905]	ENSMMUT00000022572	41	180	+
ENSMMUG00000015418	SLC25A20	Uncharacterized protein [Source:UniProtKB/TrEMBL;Acc:F6PTP5]	ENSMMUT00000021620	1401	1603	+
ENSMMUG00000011442	RAP1B	Ras-related protein Rap-1b; Ras-related protein Rap-1b isoform 1; Uncharacterized protein [Source:UniProtKB/TrEMBL;Acc:F7B9T3]	ENSMMUT00000016016	801	990	+
ENSMMUG00000016053	LIX1L	Uncharacterized protein [Source:UniProtKB/TrEMBL;Acc:F7GPQ7]	ENSMMUT00000022573	501	680	+
ENSMMUG00000000081	PRKAR2A	protein kinase, cAMP-dependent, regulatory, type II, alpha [Source:HGNC Symbol;Acc:HGNC:9391]	ENSMMUT00000000115	1	130	+
ENSMMUG00000016738	POLR3GL	DNA-directed RNA polymerase III subunit RPC7-like; Uncharacterized protein [Source:UniProtKB/TrEMBL;Acc:F6V5W7]	ENSMMUT00000023513	491	680	+
ENSMMUG00000014186	NUP107	Uncharacterized protein [Source:UniProtKB/TrEMBL;Acc:F7AS65]	ENSMMUT00000019904	2071	2290	+
ENSMMUG00000014730	IP6K2	Uncharacterized protein [Source:UniProtKB/TrEMBL;Acc:F6PU82]	ENSMMUT00000046185	1551	1910	+
ENSMMUG00000019570			ENSMMUT00000027488	901	1037	+
ENSMMUG00000016624	TMEM261	transmembrane protein 261 [Source:HGNC Symbol;Acc:HGNC:30536]	ENSMMUT00000023359	411	580	+
ENSMMUG00000014720	NCKIPSD	Uncharacterized protein [Source:UniProtKB/TrEMBL;Acc:F7GBC7]	ENSMMUT00000020647	1771	1950	+
ENSMMUG00000015985			ENSMMUT00000022476	2921	3090	+
ENSMMUG00000014187	SLC35E3	Solute carrier family 35 member E3; Uncharacterized protein [Source:UniProtKB/TrEMBL;Acc:F7AS39]	ENSMMUT00000019907	1031	1170	+
ENSMMUG00000031754	SLC26A6	Uncharacterized protein [Source:UniProtKB/TrEMBL;Acc:F6PIY5]	ENSMMUT00000020622	2571	2710	+
ENSMMUG00000009024	CHD1L	chromodomain helicase DNA binding protein 1-like [Source:HGNC Symbol;Acc:HGNC:1916]	ENSMMUT00000012616	1451	1665	+
ENSMMUG00000014193	MDM2	Uncharacterized protein [Source:UniProtKB/TrEMBL;Acc:F7AJY5]	ENSMMUT00000019920	1001	1390	+
ENSMMUG00000002176	UHRF2	ubiquitin-like with PHD and ring finger domains 2, E3 ubiquitin protein ligase [Source:HGNC Symbol;Acc:HGNC:12557]	ENSMMUT00000003071	371	600	+
ENSMMUG00000011603	RANBP6	RAN binding protein 6 [Source:HGNC Symbol;Acc:HGNC:9851]	ENSMMUT00000016259	1821	1920	+
ENSMMUG00000014705	UQCRC1	Macaca mulatta ubiquinol-cytochrome c reductase core protein I (UQCRC1), mRNA. [Source:RefSeq mRNA;Acc:NM_001040119]	ENSMMUT00000020619	1461	1590	+
ENSMMUG00000005469	ERMP1	endoplasmic reticulum metallopeptidase 1 [Source:HGNC Symbol;Acc:HGNC:23703]	ENSMMUT00000007705	41	592	+
ENSMMUG00000009020	KIAA1432	Uncharacterized protein [Source:UniProtKB/TrEMBL;Acc:F7FH62]	ENSMMUT00000012605	2081	2454	+
ENSMMUG00000017991	PDCD1LG2	Macaca mulatta programmed cell death 1 ligand 2 (PDCD1LG2), mRNA. [Source:RefSeq mRNA;Acc:NM_001083599]	ENSMMUT00000025274	211	390	+
ENSMMUG00000000946	CPM	carboxypeptidase M [Source:HGNC Symbol;Acc:HGNC:2311]	ENSMMUT00000001352	1021	1180	+
ENSMMUG00000002921	CPSF6	Cleavage and polyadenylation specificity factor subunit 6; Uncharacterized protein [Source:UniProtKB/TrEMBL;Acc:F7H1Q9]	ENSMMUT00000004145	1821	1990	+
ENSMMUG00000016786	BCL9	B-cell CLL/lymphoma 9 protein; Uncharacterized protein [Source:UniProtKB/TrEMBL;Acc:F7D4Z2]	ENSMMUT00000023584	4961	5220	+
ENSMMUG00000013561	ACP6	Lysophosphatidic acid phosphatase type 6; Uncharacterized protein [Source:UniProtKB/TrEMBL;Acc:F6PJQ1]	ENSMMUT00000046160	1641	1791	+
ENSMMUG00000006197	PLGRKT	Transmembrane protein C9orf46; Uncharacterized protein [Source:UniProtKB/TrEMBL;Acc:F7HNT6]	ENSMMUT00000008670	571	693	+
ENSMMUG00000010820	CCT2	Uncharacterized protein [Source:UniProtKB/TrEMBL;Acc:F6PJP5]	ENSMMUT00000015131	741	940	+
ENSMMUG00000006196			ENSMMUT00000008668	540	680	+
ENSMMUG00000014558	JAK2	Tyrosine-protein kinase [Source:UniProtKB/TrEMBL;Acc:F7GT47]	ENSMMUT00000020426	3101	3500	+
ENSMMUG00000000502			ENSMMUT00000000738	986	1147	+
ENSMMUG00000006716	RCL1	Uncharacterized protein [Source:UniProtKB/TrEMBL;Acc:F7BDP3]	ENSMMUT00000009404	1221	1428	+
ENSMMUG00000000143	AK3	GTP:AMP phosphotransferase, mitochondrial isoform a; Uncharacterized protein [Source:UniProtKB/TrEMBL;Acc:F7H3S6]	ENSMMUT00000000204	1671	1930	+
ENSMMUG00000007256	SF3B4	Splicing factor 3B subunit 4; Uncharacterized protein [Source:UniProtKB/TrEMBL;Acc:F7FGV3]	ENSMMUT00000010136	911	1040	+
ENSMMUG00000014853	CNOT2	CCR4-NOT transcription complex subunit 2; CCR4-associated factor 2; Uncharacterized protein [Source:UniProtKB/TrEMBL;Acc:F7BE69]	ENSMMUT00000046139	2231	2380	+
ENSMMUG00000000802	RFX3	Uncharacterized protein [Source:UniProtKB/TrEMBL;Acc:F6R1R2]	ENSMMUT00000001164	2241	2430	+
ENSMMUG00000007244	OTUD7B	OTU domain-containing protein 7B; Uncharacterized protein [Source:UniProtKB/TrEMBL;Acc:F7BEE5]	ENSMMUT00000046131	1691	1882	+
ENSMMUG00000013673	VPS45	vacuolar protein sorting 45 homolog (S. cerevisiae) [Source:HGNC Symbol;Acc:HGNC:14579]	ENSMMUT00000019205	1391	1590	+
ENSMMUG00000002362	KIAA0020	KIAA0020 [Source:HGNC Symbol;Acc:HGNC:29676]	ENSMMUT00000003348	1521	1640	+
ENSMMUG00000020954	CDC25A	cell division cycle 25A [Source:HGNC Symbol;Acc:HGNC:1725]	ENSMMUT00000029466	1421	1570	+
ENSMMUG00000013681	PLEKHO1	Uncharacterized protein [Source:UniProtKB/TrEMBL;Acc:F7BER0]	ENSMMUT00000019215	1401	1590	+
ENSMMUG00000003823	MAP4	microtubule-associated protein 4 [Source:HGNC Symbol;Acc:HGNC:6862]	ENSMMUT00000005407	551	750	+
ENSMMUG00000021531	ANP32E	acidic (leucine-rich) nuclear phosphoprotein 32 family, member E [Source:HGNC Symbol;Acc:HGNC:16673]	ENSMMUT00000017513	361	780	+
ENSMMUG00000015279	SMARCA2	Uncharacterized protein [Source:UniProtKB/TrEMBL;Acc:F7BEV7]	ENSMMUT00000021425	3451	3730	+
ENSMMUG00000003820	DHX30	Uncharacterized protein [Source:UniProtKB/TrEMBL;Acc:F7HRB8]	ENSMMUT00000005402	1311	2060	+
ENSMMUG00000021386	APH1A	Uncharacterized protein [Source:UniProtKB/TrEMBL;Acc:F7FDJ2]	ENSMMUT00000030104	1241	1500	+
ENSMMUG00000020943	ZFC3H1	zinc finger, C3H1-type containing [Source:HGNC Symbol;Acc:HGNC:28328]	ENSMMUT00000029452	6741	6869	+
ENSMMUG00000009345	SMARCC1	Uncharacterized protein [Source:UniProtKB/TrEMBL;Acc:F7HJG9]	ENSMMUT00000013058	4021	4170	+
ENSMMUG00000013385	C3ORF75	Uncharacterized protein [Source:UniProtKB/TrEMBL;Acc:F7AB69]	ENSMMUT00000018775	681	890	+
ENSMMUG00000014046	SCAP	SREBF chaperone [Source:HGNC Symbol;Acc:HGNC:30634]	ENSMMUT00000019716	3708	3921	+
ENSMMUG00000016976	DOCK8	Uncharacterized protein [Source:UniProtKB/TrEMBL;Acc:F7AZW3]	ENSMMUT00000023857	6160	6730	+
ENSMMUG00000020948	TMEM19	Transmembrane protein 19; Uncharacterized protein [Source:UniProtKB/TrEMBL;Acc:F7H2C0]	ENSMMUT00000029459	1321	1472	+
ENSMMUG00000007303	RPRD2	regulation of nuclear pre-mRNA domain containing 2 [Source:HGNC Symbol;Acc:HGNC:29039]	ENSMMUT00000010201	2821	3090	+
ENSMMUG00000007727	TBC1D15	TBC1 domain family, member 15 [Source:HGNC Symbol;Acc:HGNC:25694]	ENSMMUT00000010816	786	1260	+
ENSMMUG00000006256	TARS2	threonyl-tRNA synthetase 2, mitochondrial (putative) [Source:HGNC Symbol;Acc:HGNC:30740]	ENSMMUT00000008757	2051	2260	+
ENSMMUG00000014045	PTPN23	protein tyrosine phosphatase, non-receptor type 23 [Source:HGNC Symbol;Acc:HGNC:14406]	ENSMMUT00000019713	4801	5030	+
ENSMMUG00000021117	SETD2	Uncharacterized protein [Source:UniProtKB/TrEMBL;Acc:F7HU59]	ENSMMUT00000029698	7101	7340	+
ENSMMUG00000009638	GLIPR1	Glioma pathogenesis-related protein 1; Uncharacterized protein [Source:UniProtKB/TrEMBL;Acc:F6YQN5]	ENSMMUT00000013458	291	560	+
ENSMMUG00000009640	KRR1	KRR1 small subunit processome component [Source:UniProtKB/TrEMBL;Acc:F6YQM6]	ENSMMUT00000013459	881	1060	+
ENSMMUG00000008221	MCL1	Induced myeloid leukemia cell differentiation protein Mcl-1 isoform 1; Uncharacterized protein [Source:UniProtKB/TrEMBL;Acc:F7HUE9]	ENSMMUT00000011489	3261	3400	+
ENSMMUG00000010668	GOLPH3L	Golgi phosphoprotein 3-like; Uncharacterized protein [Source:UniProtKB/TrEMBL;Acc:F7B4L7]	ENSMMUT00000014918	821	970	+
ENSMMUG00000011856		Uncharacterized protein [Source:UniProtKB/TrEMBL;Acc:F7BLR5]	ENSMMUT00000016606	779	896	+
ENSMMUG00000015583		Uncharacterized protein [Source:UniProtKB/TrEMBL;Acc:F6TEK2]	ENSMMUT00000046092	371	560	+
ENSMMUG00000000541	ARNT	aryl hydrocarbon receptor nuclear translocator [Source:HGNC Symbol;Acc:HGNC:700]	ENSMMUT00000000789	2391	2540	+
ENSMMUG00000017862	BBS10	Bardet-Biedl syndrome 10 [Source:HGNC Symbol;Acc:HGNC:26291]	ENSMMUT00000025102	281	530	+
ENSMMUG00000017864	OSBPL8	Oxysterol-binding protein [Source:UniProtKB/TrEMBL;Acc:F7DPV1]	ENSMMUT00000025106	2821	3087	+
ENSMMUG00000023235	SETDB1	SET domain, bifurcated 1 [Source:HGNC Symbol;Acc:HGNC:10761]	ENSMMUT00000032683	3891	4040	+
ENSMMUG00000018254	ZDHHC17	zinc finger, DHHC-type containing 17 [Source:HGNC Symbol;Acc:HGNC:18412]	ENSMMUT00000025647	2351	2774	+
ENSMMUG00000023234	LASS2	Uncharacterized protein [Source:UniProtKB/TrEMBL;Acc:F7BTC4]	ENSMMUT00000032680	1211	1456	+
ENSMMUG00000022846	E2F7	E2F transcription factor 7 [Source:HGNC Symbol;Acc:HGNC:23820]	ENSMMUT00000032160	1431	1610	+
ENSMMUG00000012603	FAM122A	Protein FAM122A; Putative uncharacterized protein FAM122A; Uncharacterized protein [Source:UniProtKB/TrEMBL;Acc:F7F9H1]	ENSMMUT00000017668	871	1096	+
ENSMMUG00000000357	FXN	Frataxin, mitochondrial isoform 1 preproprotein; Uncharacterized protein [Source:UniProtKB/TrEMBL;Acc:F6YM07]	ENSMMUT00000000518	571	750	+
ENSMMUG00000010068	PRUNE	Uncharacterized protein [Source:UniProtKB/TrEMBL;Acc:F6T7H8]	ENSMMUT00000014058	1151	1658	+
ENSMMUG00000003132	PTAR1	Uncharacterized protein [Source:UniProtKB/TrEMBL;Acc:F7BU18]	ENSMMUT00000004437	936	1180	+
ENSMMUG00000002130	SACM1L	Uncharacterized protein [Source:UniProtKB/TrEMBL;Acc:F6UPL3]	ENSMMUT00000046057	3441	3548	+
ENSMMUG00000010074	CDC42SE1	CDC42 small effector protein 1; Uncharacterized protein [Source:UniProtKB/TrEMBL;Acc:F6T0R1]	ENSMMUT00000014064	331	570	+
ENSMMUG00000008346	SMC5	structural maintenance of chromosomes 5 [Source:HGNC Symbol;Acc:HGNC:20465]	ENSMMUT00000011671	2109	2258	+
ENSMMUG00000010711	LIMD1	LIM domains containing 1 [Source:HGNC Symbol;Acc:HGNC:6612]	ENSMMUT00000014982	211	550	+
ENSMMUG00000018020	LARS2	leucyl-tRNA synthetase 2, mitochondrial [Source:HGNC Symbol;Acc:HGNC:17095]	ENSMMUT00000025310	2771	3270	+
ENSMMUG00000005742	CDCP1	CUB domain containing protein 1 [Source:HGNC Symbol;Acc:HGNC:24357]	ENSMMUT00000008062	2451	2880	+
ENSMMUG00000007898	LYSMD1	LysM and putative peptidoglycan-binding domain-containing protein 1 isoform a; Uncharacterized protein [Source:UniProtKB/TrEMBL;Acc:F7AZF7]	ENSMMUT00000011059	1191	1360	+
ENSMMUG00000019130	EXOSC7	Exosome complex component RRP42; Uncharacterized protein [Source:UniProtKB/TrEMBL;Acc:F6T0A2]	ENSMMUT00000046049	841	1059	+
ENSMMUG00000019214	PPP1R12A	Uncharacterized protein [Source:UniProtKB/TrEMBL;Acc:F6QPC9]	ENSMMUT00000026990	2991	3290	+
ENSMMUG00000019740	ZDHHC3	Palmitoyltransferase ZDHHC3 isoform 1; Uncharacterized protein [Source:UniProtKB/TrEMBL;Acc:F7AYQ9]	ENSMMUT00000027743	1421	1930	+
ENSMMUG00000005228	PSMD4	Macaca mulatta proteasome (prosome, macropain) 26S subunit, non-ATPase, 4 (PSMD4), mRNA. [Source:RefSeq mRNA;Acc:NM_001136568]	ENSMMUT00000046046	2476	2691	+
ENSMMUG00000013166	ZNF687	Uncharacterized protein [Source:UniProtKB/TrEMBL;Acc:F6Z211]	ENSMMUT00000046043	1361	1640	+
ENSMMUG00000003650	TMEM42	Transmembrane protein 42; Uncharacterized protein [Source:UniProtKB/TrEMBL;Acc:F6PXS8]	ENSMMUT00000005166	412	680	+
ENSMMUG00000023151	KIF15	kinesin family member 15 [Source:HGNC Symbol;Acc:HGNC:17273]	ENSMMUT00000032573	3891	4080	+
ENSMMUG00000013170	PI4KB	Uncharacterized protein [Source:UniProtKB/TrEMBL;Acc:F6XXW9]	ENSMMUT00000018476	2921	3200	+
ENSMMUG00000013172	RFX5	DNA-binding protein RFX5; Uncharacterized protein [Source:UniProtKB/TrEMBL;Acc:F6XXU4]	ENSMMUT00000018478	1261	1500	+
ENSMMUG00000020924	PSMB4	Proteasome subunit beta type [Source:UniProtKB/TrEMBL;Acc:F7H4P3]	ENSMMUT00000029425	12	210	+
ENSMMUG00000018880	FAM108B1	Abhydrolase domain-containing protein FAM108B1 isoform 1; Uncharacterized protein [Source:UniProtKB/TrEMBL;Acc:F7A7W3]	ENSMMUT00000026541	1001	1160	+
ENSMMUG00000020925	POGZ	Pogo transposable element with ZNF domain isoform 1; Uncharacterized protein [Source:UniProtKB/TrEMBL;Acc:F7H4N3]	ENSMMUT00000029430	5871	6030	+
ENSMMUG00000022227	ZNF445	Uncharacterized protein [Source:UniProtKB/TrEMBL;Acc:F6Z294]	ENSMMUT00000031265	3471	3670	+
ENSMMUG00000005230	ZFAND5	AN1-type zinc finger protein 5; Uncharacterized protein; Zinc finger A20 domain-containing protein 2 [Source:UniProtKB/TrEMBL;Acc:F7C2C8]	ENSMMUT00000046026	1301	1450	+
ENSMMUG00000001096	TCAIM	T cell activation inhibitor, mitochondrial [Source:HGNC Symbol;Acc:HGNC:25241]	ENSMMUT00000001553	1311	1510	+
ENSMMUG00000023124	TMEM43	transmembrane protein 43 [Source:HGNC Symbol;Acc:HGNC:28472]	ENSMMUT00000046004	292	511	+
ENSMMUG00000012667	ANXA1	Annexin [Source:UniProtKB/TrEMBL;Acc:F7D2H1]	ENSMMUT00000045992	833	980	+
ENSMMUG00000001028	SNRK	Uncharacterized protein [Source:UniProtKB/TrEMBL;Acc:F6SIC4]	ENSMMUT00000001465	2311	2570	+
ENSMMUG00000006340	SLC6A6	Transporter [Source:UniProtKB/TrEMBL;Acc:F7D2B9]	ENSMMUT00000008890	61	210	+
ENSMMUG00000014777	C11H3ORF19	Uncharacterized protein [Source:UniProtKB/TrEMBL;Acc:F6WDL1]	ENSMMUT00000020732	1311	1476	+
ENSMMUG00000021242	NKTR	natural killer cell triggering receptor [Source:HGNC Symbol;Acc:HGNC:7833]	ENSMMUT00000029888	2681	2780	+
ENSMMUG00000005156	NR2C2	nuclear receptor subfamily 2, group C, member 2 [Source:HGNC Symbol;Acc:HGNC:7972]	ENSMMUT00000007264	1631	1840	+
ENSMMUG00000001075		Uncharacterized protein [Source:UniProtKB/TrEMBL;Acc:F6QMK0]	ENSMMUT00000001528	2151	2500	+
ENSMMUG00000014627	CTNNB1	Uncharacterized protein [Source:UniProtKB/TrEMBL;Acc:F6VB10]	ENSMMUT00000020513	2871	3125	+
ENSMMUG00000019754	VPS13A	Uncharacterized protein [Source:UniProtKB/TrEMBL;Acc:F6VC84]	ENSMMUT00000027775	9381	9630	+
ENSMMUG00000008145	S100A1	Uncharacterized protein [Source:UniProtKB/TrEMBL;Acc:F7HGE0]	ENSMMUT00000011379	231	400	+
ENSMMUG00000008146	CHTOP	Uncharacterized protein [Source:UniProtKB/TrEMBL;Acc:F6VBS9]	ENSMMUT00000011381	1071	1244	+
ENSMMUG00000022965		Uncharacterized protein [Source:UniProtKB/TrEMBL;Acc:F6U6B5]	ENSMMUT00000032328	661	840	+
ENSMMUG00000008148	SNAPIN	SNARE-associated protein Snapin; Uncharacterized protein [Source:UniProtKB/TrEMBL;Acc:F7HGD6]	ENSMMUT00000011382	411	650	+
ENSMMUG00000008149	ILF2	Uncharacterized protein [Source:UniProtKB/TrEMBL;Acc:F7HE92]	ENSMMUT00000011384	1063	1360	+
ENSMMUG00000013171	H1FX	Histone H1x; Uncharacterized protein [Source:UniProtKB/TrEMBL;Acc:F6Z1X9]	ENSMMUT00000018474	771	1010	+
ENSMMUG00000013167	C11H3ORF37	Uncharacterized protein [Source:UniProtKB/TrEMBL;Acc:F6Z1Y7]	ENSMMUT00000018473	1181	1410	+
ENSMMUG00000022963	SLC25A38	Uncharacterized protein [Source:UniProtKB/TrEMBL;Acc:F6U6E7]	ENSMMUT00000032324	711	910	+
ENSMMUG00000011585	CNBP	Cellular nucleic acid-binding protein isoform 3; Uncharacterized protein [Source:UniProtKB/TrEMBL;Acc:F6PPB3]	ENSMMUT00000016234	1091	1300	+
ENSMMUG00000020147	CSRNP1	Uncharacterized protein [Source:UniProtKB/TrEMBL;Acc:F6TYP2]	ENSMMUT00000028348	1871	2070	+
ENSMMUG00000011868	PSAT1	Uncharacterized protein [Source:UniProtKB/TrEMBL;Acc:F7H2J6]	ENSMMUT00000016628	1221	1440	+
ENSMMUG00000020144	GORASP1	Uncharacterized protein [Source:UniProtKB/TrEMBL;Acc:F6TYT5]	ENSMMUT00000028343	2481	2640	+
ENSMMUG00000006338	ACAD9	Uncharacterized protein [Source:UniProtKB/TrEMBL;Acc:F7HE77]	ENSMMUT00000008889	2056	2340	+
ENSMMUG00000019482	INTS3	Uncharacterized protein [Source:UniProtKB/TrEMBL;Acc:F7D405]	ENSMMUT00000027376	3961	4160	+
ENSMMUG00000023365	TLE4	transducin-like enhancer of split 4 [Source:HGNC Symbol;Acc:HGNC:11840]	ENSMMUT00000006540	3071	3310	+
ENSMMUG00000020138	WDR48	Uncharacterized protein [Source:UniProtKB/TrEMBL;Acc:F6TZL8]	ENSMMUT00000028339	2041	2467	+
ENSMMUG00000018663	EEFSEC	eukaryotic elongation factor, selenocysteine-tRNA-specific [Source:HGNC Symbol;Acc:HGNC:24614]	ENSMMUT00000026235	981	1430	+
ENSMMUG00000018662	RUVBL1	Uncharacterized protein [Source:UniProtKB/TrEMBL;Acc:F6VIT7]	ENSMMUT00000045922	911	1090	+
ENSMMUG00000018661	SEC61A1	Sec61 alpha 1 subunit (S. cerevisiae) [Source:HGNC Symbol;Acc:HGNC:18276]	ENSMMUT00000026233	3001	3200	+
ENSMMUG00000002696	GATAD2B	GATA zinc finger domain containing 2B [Source:HGNC Symbol;Acc:HGNC:30778]	ENSMMUT00000003838	461	650	+
ENSMMUG00000019931	UBQLN1	ubiquilin 1 [Source:HGNC Symbol;Acc:HGNC:12508]	ENSMMUT00000027997	311	539	+
ENSMMUG00000005002	DENND4B	DENN/MADD domain containing 4B [Source:HGNC Symbol;Acc:HGNC:29044]	ENSMMUT00000007052	4551	4780	+
ENSMMUG00000018792	EXOG	endo/exonuclease (5'-3'), endonuclease G-like [Source:HGNC Symbol;Acc:HGNC:3347]	ENSMMUT00000026426	741	1060	+
ENSMMUG00000005005	CRTC2	Uncharacterized protein [Source:UniProtKB/TrEMBL;Acc:F6VJE1]	ENSMMUT00000007054	901	1060	+
ENSMMUG00000000166	ABTB1	Uncharacterized protein [Source:UniProtKB/TrEMBL;Acc:F7HLS9]	ENSMMUT00000000243	1271	1510	+
ENSMMUG00000005007	SLC39A1	Uncharacterized protein; Zinc transporter ZIP1 [Source:UniProtKB/TrEMBL;Acc:F7AMB0]	ENSMMUT00000007057	911	1137	+
ENSMMUG00000018871	HNRNPK	Heterogeneous nuclear ribonucleoprotein K isoform b; Uncharacterized protein [Source:UniProtKB/TrEMBL;Acc:F6VJH6]	ENSMMUT00000026533	201	360	+
ENSMMUG00000000996	OXSR1	Serine/threonine-protein kinase OSR1; Uncharacterized protein [Source:UniProtKB/TrEMBL;Acc:F6SQU7]	ENSMMUT00000001423	1221	1330	+
ENSMMUG00000000158	MCM2	minichromosome maintenance complex component 2 [Source:HGNC Symbol;Acc:HGNC:6944]	ENSMMUT00000000234	2697	2964	+
ENSMMUG00000005010	JTB	jumping translocation breakpoint [Source:HGNC Symbol;Acc:HGNC:6201]	ENSMMUT00000007064	831	981	+
ENSMMUG00000000756	TPRA1	Uncharacterized protein [Source:UniProtKB/TrEMBL;Acc:F6RK16]	ENSMMUT00000001090	1251	1578	+
ENSMMUG00000000995	MYD88	Macaca mulatta myeloid differentiation primary response gene (88) (MYD88), mRNA. [Source:RefSeq mRNA;Acc:NM_001130681]	ENSMMUT00000001422	1071	1220	+
ENSMMUG00000000990	ACAA1	Uncharacterized protein [Source:UniProtKB/TrEMBL;Acc:F6SR59]	ENSMMUT00000001420	1461	1700	+
ENSMMUG00000017586	RAB13	Ras-related protein Rab-13; Uncharacterized protein [Source:UniProtKB/TrEMBL;Acc:F6WJR6]	ENSMMUT00000024733	691	1040	+
ENSMMUG00000010805	TPM3	tropomyosin 3 [Source:HGNC Symbol;Acc:HGNC:12012]	ENSMMUT00000015105	1001	1110	+
ENSMMUG00000008801	AGTPBP1	Uncharacterized protein [Source:UniProtKB/TrEMBL;Acc:F6VRN6]	ENSMMUT00000012318	3661	3780	+
ENSMMUG00000015864	TMTC3	transmembrane and tetratricopeptide repeat containing 3 [Source:HGNC Symbol;Acc:HGNC:26899]	ENSMMUT00000045898	2641	2835	+
ENSMMUG00000001275			ENSMMUT00000001807	461	804	+
ENSMMUG00000010808	C1orf43	chromosome 1 open reading frame 43 [Source:HGNC Symbol;Acc:HGNC:29876]	ENSMMUT00000015112	741	1127	+
ENSMMUG00000001898	NAA35	Uncharacterized protein [Source:UniProtKB/TrEMBL;Acc:F7FX45]	ENSMMUT00000002682	1771	1920	+
ENSMMUG00000010810	UBAP2L	Ubiquitin-associated protein 2-like isoform b; Uncharacterized protein [Source:UniProtKB/TrEMBL;Acc:F6VRQ3]	ENSMMUT00000015117	1741	1940	+
ENSMMUG00000003574	POC1B	Uncharacterized protein [Source:UniProtKB/TrEMBL;Acc:F6VRP4]	ENSMMUT00000005055	1236	1830	+
ENSMMUG00000003399	ISCA1	Iron-sulfur cluster assembly 1 homolog, mitochondrial; Uncharacterized protein [Source:UniProtKB/TrEMBL;Acc:F7FEI1]	ENSMMUT00000004809	237	640	+
ENSMMUG00000003401	ZCCHC6	zinc finger, CCHC domain containing 6 [Source:HGNC Symbol;Acc:HGNC:25817]	ENSMMUT00000004824	4221	4610	+
ENSMMUG00000023364	ATP8B2	ATPase, aminophospholipid transporter, class I, type 8B, member 2 [Source:HGNC Symbol;Acc:HGNC:13534]	ENSMMUT00000032874	3525	3950	+
ENSMMUG00000017053	DAPK1	Death-associated protein kinase 1; Uncharacterized protein [Source:UniProtKB/TrEMBL;Acc:F7HLL1]	ENSMMUT00000023978	4711	4840	+
ENSMMUG00000017609	CTSL	cathepsin L [Source:HGNC Symbol;Acc:HGNC:2537]	ENSMMUT00000024761	1271	1448	+
ENSMMUG00000019547	UBE2Q1	ubiquitin-conjugating enzyme E2Q family member 1 [Source:HGNC Symbol;Acc:HGNC:15698]	ENSMMUT00000027456	1201	1516	+
ENSMMUG00000022539	LRRFIP2	leucine rich repeat (in FLII) interacting protein 2 [Source:HGNC Symbol;Acc:HGNC:6703]	ENSMMUT00000031718	31	180	+
ENSMMUG00000016093	ADAR	Uncharacterized protein [Source:UniProtKB/TrEMBL;Acc:F7GLF8]	ENSMMUT00000022629	3573	3862	+
ENSMMUG00000022533	MLH1	Uncharacterized protein [Source:UniProtKB/TrEMBL;Acc:F6YA45]	ENSMMUT00000031714	1231	1460	+
ENSMMUG00000009555	BTG1	Protein BTG1; Uncharacterized protein [Source:UniProtKB/TrEMBL;Acc:F6Y7P5]	ENSMMUT00000013333	481	810	+
ENSMMUG00000017793	KCNN3	potassium intermediate/small conductance calcium-activated channel, subfamily N, member 3 [Source:HGNC Symbol;Acc:HGNC:6292]	ENSMMUT00000025006	791	940	+
ENSMMUG00000016804	NUDT4	Uncharacterized protein [Source:UniProtKB/TrEMBL;Acc:F7CYP9]	ENSMMUT00000023608	431	610	+
ENSMMUG00000012532	SECISBP2	SECIS binding protein 2 [Source:HGNC Symbol;Acc:HGNC:30972]	ENSMMUT00000017569	2601	2790	+
ENSMMUG00000006576	PBXIP1	pre-B-cell leukemia homeobox interacting protein 1 [Source:HGNC Symbol;Acc:HGNC:21199]	ENSMMUT00000009208	1291	1500	+
ENSMMUG00000006579	PYGO2	pygopus family PHD finger 2 [Source:HGNC Symbol;Acc:HGNC:30257]	ENSMMUT00000009211	1261	1680	+
ENSMMUG00000008629	SEMA4D	sema domain, immunoglobulin domain (Ig), transmembrane domain (TM) and short cytoplasmic domain, (semaphorin) 4D [Source:HGNC Symbol;Acc:HGNC:10732]	ENSMMUT00000012067	4001	4391	+
ENSMMUG00000006581	SHC1	Uncharacterized protein [Source:UniProtKB/TrEMBL;Acc:F6VZ20]	ENSMMUT00000009213	441	580	+
ENSMMUG00000015917	ST6GALNAC4	Uncharacterized protein [Source:UniProtKB/TrEMBL;Acc:F6VZ33]	ENSMMUT00000045870	951	1154	+
ENSMMUG00000018258	PTGES2	prostaglandin E synthase 2 [Source:HGNC Symbol;Acc:HGNC:17822]	ENSMMUT00000025656	221	370	+
ENSMMUG00000018898	NR2C1	Uncharacterized protein [Source:UniProtKB/TrEMBL;Acc:F6W055]	ENSMMUT00000026567	151	270	+
ENSMMUG00000014375	FAM102A	Early estrogen-induced gene 1 protein; Early estrogen-induced gene 1 protein isoform a; Uncharacterized protein [Source:UniProtKB/TrEMBL;Acc:F7CLX8]	ENSMMUT00000020172	1251	1720	+
ENSMMUG00000014374	DPM2	Uncharacterized protein [Source:UniProtKB/TrEMBL;Acc:F7CLY7]	ENSMMUT00000020171	1151	1540	+
ENSMMUG00000001185	TRA2B	Uncharacterized protein [Source:UniProtKB/TrEMBL;Acc:F6R8W2]	ENSMMUT00000001680	801	990	+
ENSMMUG00000023340	ADAM15	ADAM metallopeptidase domain 15 [Source:HGNC Symbol;Acc:HGNC:193]	ENSMMUT00000032837	2601	2805	+
ENSMMUG00000018903	VEZT	Uncharacterized protein [Source:UniProtKB/TrEMBL;Acc:F6TT91]	ENSMMUT00000026576	2241	2490	+
ENSMMUG00000013813	METAP2	Methionine aminopeptidase [Source:UniProtKB/TrEMBL;Acc:F6T624]	ENSMMUT00000045854	1611	1728	+
ENSMMUG00000013018	SENP2	SUMO1/sentrin/SMT3 specific peptidase 2 [Source:HGNC Symbol;Acc:HGNC:23116]	ENSMMUT00000018259	2511	2830	+
ENSMMUG00000013195	CDK9	Uncharacterized protein [Source:UniProtKB/TrEMBL;Acc:F6XP46]	ENSMMUT00000018509	1411	1600	+
ENSMMUG00000013812	USP44	ubiquitin specific peptidase 44 [Source:HGNC Symbol;Acc:HGNC:20064]	ENSMMUT00000019393	1021	1160	+
ENSMMUG00000016432	SH2D3C	SH2 domain containing 3C [Source:HGNC Symbol;Acc:HGNC:16884]	ENSMMUT00000023076	2641	2840	+
ENSMMUG00000000425	VPS8	vacuolar protein sorting 8 homolog (S. cerevisiae) [Source:HGNC Symbol;Acc:HGNC:29122]	ENSMMUT00000000624	4551	4940	+
ENSMMUG00000013219	SLC50A1	Uncharacterized protein [Source:UniProtKB/TrEMBL;Acc:F6TTJ4]	ENSMMUT00000018542	751	890	+
ENSMMUG00000016424	PTRH1	Putative peptidyl-tRNA hydrolase; Uncharacterized protein [Source:UniProtKB/TrEMBL;Acc:F7FKW9]	ENSMMUT00000023062	2121	2257	+
ENSMMUG00000019036	DPM3	Uncharacterized protein [Source:UniProtKB/TrEMBL;Acc:F6R3K4]	ENSMMUT00000026747	11	120	+
ENSMMUG00000012180	KRTCAP2	Uncharacterized protein [Source:UniProtKB/TrEMBL;Acc:F7HTS8]	ENSMMUT00000017057	371	529	+
ENSMMUG00000009312	LTA4H	leukotriene A4 hydrolase [Source:HGNC Symbol;Acc:HGNC:6710]	ENSMMUT00000013015	111	300	+
ENSMMUG00000015902	CDK17	Cyclin-dependent kinase 17 isoform 1; Uncharacterized protein [Source:UniProtKB/TrEMBL;Acc:F7ATI3]	ENSMMUT00000022345	1571	1831	+
ENSMMUG00000008506	MTX1	Uncharacterized protein [Source:UniProtKB/TrEMBL;Acc:F6TU71]	ENSMMUT00000011889	1301	1529	+
ENSMMUG00000007524	POLR2H	polymerase (RNA) II (DNA directed) polypeptide H [Source:HGNC Symbol;Acc:HGNC:9195]	ENSMMUT00000010524	1561	1670	+
ENSMMUG00000023719	TMPO	Thymopoietin isoform alpha; Uncharacterized protein [Source:UniProtKB/TrEMBL;Acc:F7HAU0]	ENSMMUT00000033382	771	890	+
ENSMMUG00000018309	FAM189B	Uncharacterized protein [Source:UniProtKB/TrEMBL;Acc:F6TUA9]	ENSMMUT00000045819	1081	1310	+
ENSMMUG00000023036	SLC25A3	Uncharacterized protein [Source:UniProtKB/TrEMBL;Acc:F6TUD5]	ENSMMUT00000032414	1008	1198	+
ENSMMUG00000018313	SCAMP3	Secretory carrier-associated membrane protein 3 isoform 1; Uncharacterized protein [Source:UniProtKB/TrEMBL;Acc:F6TUP0]	ENSMMUT00000045813	1401	1500	+
ENSMMUG00000010934	EIF4G1	eukaryotic translation initiation factor 4 gamma, 1 [Source:HGNC Symbol;Acc:HGNC:3296]	ENSMMUT00000015299	1341	1620	+
ENSMMUG00000022404	APAF1	apoptotic peptidase activating factor 1 [Source:HGNC Symbol;Acc:HGNC:576]	ENSMMUT00000045802	3591	3736	+
ENSMMUG00000000800	PSMD2	proteasome (prosome, macropain) 26S subunit, non-ATPase, 2 [Source:HGNC Symbol;Acc:HGNC:9559]	ENSMMUT00000001162	3301	3440	+
ENSMMUG00000013640	ZBTB43	zinc finger and BTB domain containing 43 [Source:HGNC Symbol;Acc:HGNC:17908]	ENSMMUT00000019145	1811	1950	+
ENSMMUG00000023144	FDPS	Uncharacterized protein [Source:UniProtKB/TrEMBL;Acc:F7FI22]	ENSMMUT00000032559	1117	1459	+
ENSMMUG00000016826	MAPKAP1	mitogen-activated protein kinase associated protein 1 [Source:HGNC Symbol;Acc:HGNC:18752]	ENSMMUT00000045796	1961	2080	+
ENSMMUG00000018080	DAP3	death associated protein 3 [Source:HGNC Symbol;Acc:HGNC:2673]	ENSMMUT00000045790	1261	1512	+
ENSMMUG00000006558	ABCF3	ATP-binding cassette, sub-family F (GCN20), member 3 [Source:HGNC Symbol;Acc:HGNC:72]	ENSMMUT00000009191	2081	2420	+
ENSMMUG00000003668	GAPVD1	GTPase activating protein and VPS9 domains 1 [Source:HGNC Symbol;Acc:HGNC:23375]	ENSMMUT00000005198	4251	4390	+
ENSMMUG00000006557	AP2M1	AP-2 complex subunit mu isoform b; Uncharacterized protein [Source:UniProtKB/TrEMBL;Acc:F6U1B2]	ENSMMUT00000009187	36	160	+
ENSMMUG00000023601	UHRF1BP1L	UHRF1 binding protein 1-like [Source:HGNC Symbol;Acc:HGNC:29102]	ENSMMUT00000033205	1991	2190	+
ENSMMUG00000009981	MSTO1	misato 1, mitochondrial distribution and morphology regulator [Source:HGNC Symbol;Acc:HGNC:29678]	ENSMMUT00000045785	1681	1986	+
ENSMMUG00000023603	ACTR6	Uncharacterized protein [Source:UniProtKB/TrEMBL;Acc:F7HDC6]	ENSMMUT00000033211	1251	1398	+
ENSMMUG00000005217	HSPA5	78 kDa glucose-regulated protein; Uncharacterized protein [Source:UniProtKB/TrEMBL;Acc:F7C3R1]	ENSMMUT00000007348	1531	2000	+
ENSMMUG00000005215	RABEPK	Rab9 effector protein with kelch motifs [Source:HGNC Symbol;Acc:HGNC:16896]	ENSMMUT00000007343	931	1100	+
ENSMMUG00000006553	DVL3	Uncharacterized protein [Source:UniProtKB/TrEMBL;Acc:F7HRV7]	ENSMMUT00000009182	2091	2270	+
ENSMMUG00000009987	GON4L	gon-4-like (C. elegans) [Source:HGNC Symbol;Acc:HGNC:25973]	ENSMMUT00000013947	4451	4580	+
ENSMMUG00000023600	SCYL2	Uncharacterized protein [Source:UniProtKB/TrEMBL;Acc:F7HDE5]	ENSMMUT00000033200	2941	3222	+
ENSMMUG00000020549	PPP6C	Serine/threonine-protein phosphatase [Source:UniProtKB/TrEMBL;Acc:F7D2A2]	ENSMMUT00000028914	1391	1530	+
ENSMMUG00000006562	EIF2B5	Translation initiation factor eIF-2B subunit epsilon; Uncharacterized protein [Source:UniProtKB/TrEMBL;Acc:F7HRU2]	ENSMMUT00000009193	2471	2880	+
ENSMMUG00000007223	DIRAS2	Distinct subgroup of the Ras family member 2; GTP-binding protein Di-Ras2; Uncharacterized protein [Source:UniProtKB/TrEMBL;Acc:F7EK27]	ENSMMUT00000010092	891	1100	+
ENSMMUG00000001748	SYK	Tyrosine-protein kinase [Source:UniProtKB/TrEMBL;Acc:F7GLV2]	ENSMMUT00000002471	2441	2600	+
ENSMMUG00000023257	NFIL3	E4 promoter-binding protein 4; Nuclear factor interleukin-3-regulated protein; Uncharacterized protein [Source:UniProtKB/TrEMBL;Acc:F7DIW5]	ENSMMUT00000032711	1291	1430	+
ENSMMUG00000005515	ABCC5	Multidrug resistance-associated protein 5 isoform 2; Uncharacterized protein [Source:UniProtKB/TrEMBL;Acc:F6U893]	ENSMMUT00000007759	2501	2640	+
ENSMMUG00000018075	YY1AP1	YY1 associated protein 1 [Source:HGNC Symbol;Acc:HGNC:30935]	ENSMMUT00000045764	2451	2640	+
ENSMMUG00000003006	SPTLC1	serine palmitoyltransferase, long chain base subunit 1 [Source:HGNC Symbol;Acc:HGNC:11277]	ENSMMUT00000004255	1291	1450	+
ENSMMUG00000004628	IARS	isoleucyl-tRNA synthetase [Source:HGNC Symbol;Acc:HGNC:5330]	ENSMMUT00000006546	3321	3460	+
ENSMMUG00000012891	UTP20	Uncharacterized protein [Source:UniProtKB/TrEMBL;Acc:F6S843]	ENSMMUT00000018092	8341	8460	+
ENSMMUG00000021312	SYT11	Uncharacterized protein [Source:UniProtKB/TrEMBL;Acc:F6UYD0]	ENSMMUT00000029997	181	590	+
ENSMMUG00000018874	RIT1	GTP-binding protein Rit1; Uncharacterized protein [Source:UniProtKB/TrEMBL;Acc:F6WZ38]	ENSMMUT00000026531	591	950	+
ENSMMUG00000004648	KIAA0907	KIAA0907 [Source:HGNC Symbol;Acc:HGNC:29145]	ENSMMUT00000006575	2571	2790	+
ENSMMUG00000013661	PARL	Presenilins-associated rhomboid-like protein, mitochondrial isoform 1 preproprotein; Uncharacterized protein [Source:UniProtKB/TrEMBL;Acc:F7FXP9]	ENSMMUT00000027860	1041	1240	+
ENSMMUG00000005092	ARHGEF2	Rho/Rac guanine nucleotide exchange factor (GEF) 2 [Source:HGNC Symbol;Acc:HGNC:682]	ENSMMUT00000007190	3221	3555	+
ENSMMUG00000008070	YEATS2	YEATS domain containing 2 [Source:HGNC Symbol;Acc:HGNC:25489]	ENSMMUT00000011285	5251	5380	+
ENSMMUG00000008067	KLHL24	Uncharacterized protein [Source:UniProtKB/TrEMBL;Acc:F7H156]	ENSMMUT00000011280	2791	2930	+
ENSMMUG00000022115	KLHL6	kelch-like family member 6 [Source:HGNC Symbol;Acc:HGNC:18653]	ENSMMUT00000031111	1911	2140	+
ENSMMUG00000013495	SSR2	Uncharacterized protein [Source:UniProtKB/TrEMBL;Acc:F6ZKS3]	ENSMMUT00000018942	901	1109	+
ENSMMUG00000012562	GNPTAB	N-acetylglucosamine-1-phosphate transferase, alpha and beta subunits [Source:HGNC Symbol;Acc:HGNC:29670]	ENSMMUT00000017610	1821	2640	+
ENSMMUG00000004642	IPPK	Inositol-pentakisphosphate 2-kinase; Uncharacterized protein [Source:UniProtKB/TrEMBL;Acc:F6TD69]	ENSMMUT00000006565	1571	1800	+
ENSMMUG00000004689	DRAM1	Uncharacterized protein [Source:UniProtKB/TrEMBL;Acc:F6RM51]	ENSMMUT00000006622	1121	1308	+
ENSMMUG00000001061	BICD2	Uncharacterized protein [Source:UniProtKB/TrEMBL;Acc:F6QN47]	ENSMMUT00000001509	6321	6420	+
ENSMMUG00000005504	NUP37	Nucleoporin Nup37; Uncharacterized protein [Source:UniProtKB/TrEMBL;Acc:F7FLP6]	ENSMMUT00000007746	1	150	+
ENSMMUG00000020795	FGD3	Uncharacterized protein [Source:UniProtKB/TrEMBL;Acc:F6W261]	ENSMMUT00000045738	2941	3125	+
ENSMMUG00000010552	DCUN1D1	DCN1-like protein [Source:UniProtKB/TrEMBL;Acc:F7CZQ4]	ENSMMUT00000014771	801	980	+
ENSMMUG00000019323		Uncharacterized protein [Source:UniProtKB/TrEMBL;Acc:F6S2M3]	ENSMMUT00000045737	4786	5080	+
ENSMMUG00000002235	IGF1	Uncharacterized protein [Source:UniProtKB/TrEMBL;Acc:F6VZY3]	ENSMMUT00000003165	701	824	+
ENSMMUG00000031599		Uncharacterized protein [Source:UniProtKB/TrEMBL;Acc:F6W298]	ENSMMUT00000045734	51	190	+
ENSMMUG00000014398	NINJ1	Ninjurin-1; Uncharacterized protein [Source:UniProtKB/TrEMBL;Acc:F7BWD3]	ENSMMUT00000020201	681	970	+
ENSMMUG00000004901	SEMA4A	sema domain, immunoglobulin domain (Ig), transmembrane domain (TM) and short cytoplasmic domain, (semaphorin) 4A [Source:HGNC Symbol;Acc:HGNC:10729]	ENSMMUT00000045724	2741	2920	+
ENSMMUG00000009493	FAM120A	Uncharacterized protein [Source:UniProtKB/TrEMBL;Acc:F6W8T6]	ENSMMUT00000045721	2861	3400	+
ENSMMUG00000006350	NT5DC3	Uncharacterized protein [Source:UniProtKB/TrEMBL;Acc:F7HC19]	ENSMMUT00000008909	1751	2150	+
ENSMMUG00000019656	TTC14	Uncharacterized protein [Source:UniProtKB/TrEMBL;Acc:F7CU52]	ENSMMUT00000027615	2141	2380	+
ENSMMUG00000023469	HSP90B1	Uncharacterized protein [Source:UniProtKB/TrEMBL;Acc:F6W970]	ENSMMUT00000033019	2221	2420	+
ENSMMUG00000008281	PHF2	PHD finger protein 2 [Source:HGNC Symbol;Acc:HGNC:8920]	ENSMMUT00000011583	3881	4202	+
ENSMMUG00000021291	TDG	thymine-DNA glycosylase [Source:HGNC Symbol;Acc:HGNC:11700]	ENSMMUT00000029955	1011	1240	+
ENSMMUG00000000090	SMG5	Uncharacterized protein [Source:UniProtKB/TrEMBL;Acc:F6W9D7]	ENSMMUT00000000134	3191	3430	+
ENSMMUG00000022571	HCFC2	Uncharacterized protein [Source:UniProtKB/TrEMBL;Acc:F6W9B8]	ENSMMUT00000031756	2151	2429	+
ENSMMUG00000009746	NDUFB5	Uncharacterized protein [Source:UniProtKB/TrEMBL;Acc:F6W9A8]	ENSMMUT00000013614	407	586	+
ENSMMUG00000017127	CHST11	Carbohydrate sulfotransferase 11 isoform 1; Uncharacterized protein [Source:UniProtKB/TrEMBL;Acc:F6W9N9]	ENSMMUT00000045705	1301	1520	+
ENSMMUG00000000092	C1orf85	chromosome 1 open reading frame 85 [Source:HGNC Symbol;Acc:HGNC:29436]	ENSMMUT00000000137	1181	1430	+
ENSMMUG00000016343	HIATL1	Uncharacterized protein [Source:UniProtKB/TrEMBL;Acc:F7GRF2]	ENSMMUT00000022950	2241	2430	+
ENSMMUG00000017133	C12orf45	chromosome 12 open reading frame 45 [Source:HGNC Symbol;Acc:HGNC:28628]	ENSMMUT00000024087	491	590	+
ENSMMUG00000011383	MTHFD2	methylenetetrahydrofolate dehydrogenase (NADP+ dependent) 2, methenyltetrahydrofolate cyclohydrolase [Source:HGNC Symbol;Acc:HGNC:7434]	ENSMMUT00000015940	781	893	+
ENSMMUG00000009519	KIAA1033	KIAA1033 [Source:HGNC Symbol;Acc:HGNC:29174]	ENSMMUT00000013281	3413	3903	+
ENSMMUG00000004079	MFN1	Mitofusin-1; Uncharacterized protein [Source:UniProtKB/TrEMBL;Acc:F6ZJ06]	ENSMMUT00000005794	1791	2130	+
ENSMMUG00000019034	CCT3	chaperonin containing TCP1, subunit 3 (gamma) [Source:HGNC Symbol;Acc:HGNC:1616]	ENSMMUT00000045699	601	780	+
ENSMMUG00000009524	APPL2	adaptor protein, phosphotyrosine interaction, PH domain and leucine zipper containing 2 [Source:HGNC Symbol;Acc:HGNC:18242]	ENSMMUT00000013294	1811	1950	+
ENSMMUG00000002634	PTCH1	patched 1 [Source:HGNC Symbol;Acc:HGNC:9585]	ENSMMUT00000003754	3661	4200	+
ENSMMUG00000005188	PIK3CA	Uncharacterized protein [Source:UniProtKB/TrEMBL;Acc:F7CTS2]	ENSMMUT00000007307	2991	3387	+
ENSMMUG00000003711	TCP11L2	Uncharacterized protein [Source:UniProtKB/TrEMBL;Acc:F6S8U5]	ENSMMUT00000005257	1591	1800	+
ENSMMUG00000011787	ERCC6L2	excision repair cross-complementation group 6-like 2 [Source:HGNC Symbol;Acc:HGNC:26922]	ENSMMUT00000016520	620	850	+
ENSMMUG00000019597	TBL1XR1	Uncharacterized protein [Source:UniProtKB/TrEMBL;Acc:F7B9D1]	ENSMMUT00000027520	4991	5130	+
ENSMMUG00000007992	SLC35D2	Uncharacterized protein [Source:UniProtKB/TrEMBL;Acc:F6WHP3]	ENSMMUT00000011180	788	1067	+
ENSMMUG00000017014	ECT2	Uncharacterized protein [Source:UniProtKB/TrEMBL;Acc:F6WHS1]	ENSMMUT00000045672	2301	2470	+
ENSMMUG00000016696	MEF2D	Uncharacterized protein [Source:UniProtKB/TrEMBL;Acc:F6VKY1]	ENSMMUT00000023459	621	730	+
ENSMMUG00000022279	C11H12ORF23	Putative uncharacterized protein C12orf23; Uncharacterized protein [Source:UniProtKB/TrEMBL;Acc:F6WHZ2]	ENSMMUT00000031337	321	760	+
ENSMMUG00000008295	C9ORF21	Uncharacterized protein [Source:UniProtKB/TrEMBL;Acc:F6WNS0]	ENSMMUT00000011595	531	680	+
ENSMMUG00000002623	APOA1BP	apolipoprotein A-I binding protein [Source:HGNC Symbol;Acc:HGNC:18453]	ENSMMUT00000003734	1171	1390	+
ENSMMUG00000015544	PWP1	Uncharacterized protein [Source:UniProtKB/TrEMBL;Acc:F6RFX4]	ENSMMUT00000021805	141	340	+
ENSMMUG00000031574		Uncharacterized protein [Source:UniProtKB/TrEMBL;Acc:F6WPM1]	ENSMMUT00000045660	381	510	+
ENSMMUG00000017124	SART3	Squamous cell carcinoma antigen recognized by T-cells 3; Uncharacterized protein [Source:UniProtKB/TrEMBL;Acc:F7H2Z6]	ENSMMUT00000024076	2891	3230	+
ENSMMUG00000000512	CORO1C	Coronin [Source:UniProtKB/TrEMBL;Acc:F6YB63]	ENSMMUT00000045652	1271	1690	+
ENSMMUG00000013987	SLC7A14	Putative cationic amino acid transporter; Uncharacterized protein [Source:UniProtKB/TrEMBL;Acc:F6RYL9]	ENSMMUT00000019634	2217	2533	+
ENSMMUG00000015107	SSH1	slingshot protein phosphatase 1 [Source:HGNC Symbol;Acc:HGNC:30579]	ENSMMUT00000021176	2401	2800	+
ENSMMUG00000000037	ISG20L2	Interferon-stimulated 20 kDa exonuclease-like 2; Uncharacterized protein [Source:UniProtKB/TrEMBL;Acc:F7HRE8]	ENSMMUT00000000053	1261	1410	+
ENSMMUG00000022199	PHC3	polyhomeotic homolog 3 (Drosophila) [Source:HGNC Symbol;Acc:HGNC:15682]	ENSMMUT00000031219	2801	3207	+
ENSMMUG00000000038	RRNAD1	Uncharacterized protein [Source:UniProtKB/TrEMBL;Acc:F6UBA9]	ENSMMUT00000045650	391	570	+
ENSMMUG00000021899	SEC62	Translocation protein SEC62; Uncharacterized protein [Source:UniProtKB/TrEMBL;Acc:F6TBV4]	ENSMMUT00000030813	1131	1301	+
ENSMMUG00000000039	MRPL24	39S ribosomal protein L24, mitochondrial; Uncharacterized protein [Source:UniProtKB/TrEMBL;Acc:F7HPI2]	ENSMMUT00000000055	751	876	+
ENSMMUG00000005237	USP30	Ubiquitin carboxyl-terminal hydrolase [Source:UniProtKB/TrEMBL;Acc:F7BWU9]	ENSMMUT00000007375	1601	1830	+
ENSMMUG00000006956	ALKBH2	Alpha-ketoglutarate-dependent dioxygenase alkB homolog 2 isoform 1; Uncharacterized protein [Source:UniProtKB/TrEMBL;Acc:F7DWK4]	ENSMMUT00000009720	187	490	+
ENSMMUG00000006957	UNG	uracil-DNA glycosylase [Source:HGNC Symbol;Acc:HGNC:12572]	ENSMMUT00000009722	1031	1130	+
ENSMMUG00000021875	MYNN	Uncharacterized protein [Source:UniProtKB/TrEMBL;Acc:F6PYX1]	ENSMMUT00000045645	1111	1610	+
ENSMMUG00000019649	KCTD10	Uncharacterized protein [Source:UniProtKB/TrEMBL;Acc:F7CV62]	ENSMMUT00000027599	691	940	+
ENSMMUG00000019650	UBE3B	ubiquitin protein ligase E3B [Source:HGNC Symbol;Acc:HGNC:13478]	ENSMMUT00000027600	3341	3440	+
ENSMMUG00000005938	PDCD10	programmed cell death 10 [Source:HGNC Symbol;Acc:HGNC:8761]	ENSMMUT00000021997	501	920	+
ENSMMUG00000008974		Uncharacterized protein [Source:UniProtKB/TrEMBL;Acc:F7EQR1]	ENSMMUT00000012540	1401	1860	+
ENSMMUG00000008972	FCRL5	Fc receptor-like 5 [Source:HGNC Symbol;Acc:HGNC:18508]	ENSMMUT00000012536	111	280	+
ENSMMUG00000009564	NMD3	NMD3 ribosome export adaptor [Source:HGNC Symbol;Acc:HGNC:24250]	ENSMMUT00000013344	1833	2074	+
ENSMMUG00000018083	KPNA4	karyopherin alpha 4 (importin alpha 3) [Source:HGNC Symbol;Acc:HGNC:6397]	ENSMMUT00000025402	2001	2340	+
ENSMMUG00000017291	SMC4	Uncharacterized protein [Source:UniProtKB/TrEMBL;Acc:F6UIR1]	ENSMMUT00000024306	2831	3020	+
ENSMMUG00000019833	FCRL1	Fc receptor-like 1 [Source:HGNC Symbol;Acc:HGNC:18509]	ENSMMUT00000027872	1601	1876	+
ENSMMUG00000007678	ANKRD13A	ankyrin repeat domain 13A [Source:HGNC Symbol;Acc:HGNC:21268]	ENSMMUT00000010755	1891	2030	+
ENSMMUG00000020826	C12orf76	chromosome 12 open reading frame 76 [Source:HGNC Symbol;Acc:HGNC:33790]	ENSMMUT00000029297	401	540	+
ENSMMUG00000001739	ATP2A2	ATPase, Ca++ transporting, cardiac muscle, slow twitch 2 [Source:HGNC Symbol;Acc:HGNC:812]	ENSMMUT00000002456	1	200	+
ENSMMUG00000018675	ANAPC7	Uncharacterized protein [Source:UniProtKB/TrEMBL;Acc:F6ZY88]	ENSMMUT00000026255	2181	2360	+
ENSMMUG00000006494	GPN3	Uncharacterized protein [Source:UniProtKB/TrEMBL;Acc:F7H992]	ENSMMUT00000009103	871	1084	+
ENSMMUG00000023510	MFSD1	major facilitator superfamily domain containing 1 [Source:HGNC Symbol;Acc:HGNC:25874]	ENSMMUT00000033073	1691	2010	+
ENSMMUG00000004961	GFM1	Uncharacterized protein [Source:UniProtKB/TrEMBL;Acc:F6UJH2]	ENSMMUT00000045602	2251	2510	+
ENSMMUG00000013156	PPTC7	PTC7 protein phosphatase homolog (S. cerevisiae) [Source:HGNC Symbol;Acc:HGNC:30695]	ENSMMUT00000018458	881	1210	+
ENSMMUG00000012840	HVCN1	hydrogen voltage-gated channel 1 [Source:HGNC Symbol;Acc:HGNC:28240]	ENSMMUT00000018011	991	1155	+
ENSMMUG00000013664	PPP1CC	Serine/threonine-protein phosphatase [Source:UniProtKB/TrEMBL;Acc:F7GFT6]	ENSMMUT00000019184	1081	1345	+
ENSMMUG00000002223	SH2B3	Uncharacterized protein [Source:UniProtKB/TrEMBL;Acc:F6W719]	ENSMMUT00000003148	1531	1710	+
ENSMMUG00000002226	ATXN2	ataxin 2 [Source:HGNC Symbol;Acc:HGNC:10555]	ENSMMUT00000003151	551	780	+
ENSMMUG00000031548		Peptidyl-prolyl cis-trans isomerase [Source:UniProtKB/TrEMBL;Acc:F6UK89]	ENSMMUT00000045595	340	490	+
ENSMMUG00000017107	BRAP	BRCA1-associated protein; Uncharacterized protein [Source:UniProtKB/TrEMBL;Acc:F7H5B0]	ENSMMUT00000024051	1931	2150	+
ENSMMUG00000004488	PYHIN1	pyrin and HIN domain family, member 1 [Source:HGNC Symbol;Acc:HGNC:28894]	ENSMMUT00000006358	551	690	+
ENSMMUG00000016497	CCNL1	cyclin L1 [Source:HGNC Symbol;Acc:HGNC:20569]	ENSMMUT00000014999	1961	2084	+
ENSMMUG00000000366	TIPARP	Uncharacterized protein [Source:UniProtKB/TrEMBL;Acc:F6USD8]	ENSMMUT00000045586	1689	2137	+
ENSMMUG00000016970	SSR3	Translocon-associated protein subunit gamma; Uncharacterized protein [Source:UniProtKB/TrEMBL;Acc:F7B6K2]	ENSMMUT00000023845	1146	1310	+
ENSMMUG00000007324	GMPS	Glutamine-hydrolyzing GMP synthase; Uncharacterized protein [Source:UniProtKB/TrEMBL;Acc:F7EE95]	ENSMMUT00000010233	2191	2300	+
ENSMMUG00000013917	NAA25	N(alpha)-acetyltransferase 25, NatB auxiliary subunit [Source:HGNC Symbol;Acc:HGNC:25783]	ENSMMUT00000019536	2765	2910	+
ENSMMUG00000005255	TRAFD1	TRAF-type zinc finger domain-containing protein 1; Uncharacterized protein [Source:UniProtKB/TrEMBL;Acc:F7BQF4]	ENSMMUT00000007399	1971	2410	+
ENSMMUG00000007126		Uncharacterized protein [Source:UniProtKB/TrEMBL;Acc:F6V133]	ENSMMUT00000045572	9051	9230	+
ENSMMUG00000004705	TAGLN2	Transgelin-2; Uncharacterized protein [Source:UniProtKB/TrEMBL;Acc:F6RKI4]	ENSMMUT00000006645	1	130	+
ENSMMUG00000011347	DHX36	Uncharacterized protein [Source:UniProtKB/TrEMBL;Acc:F6U0V1]	ENSMMUT00000015892	2885	3265	+
ENSMMUG00000015910	MBNL1	Uncharacterized protein [Source:UniProtKB/TrEMBL;Acc:F7ALT3]	ENSMMUT00000022363	5291	5470	+
ENSMMUG00000017838	PEA15	Uncharacterized protein [Source:UniProtKB/TrEMBL;Acc:F7DQD4]	ENSMMUT00000025070	1931	2090	+
ENSMMUG00000007433		Uncharacterized protein [Source:UniProtKB/TrEMBL;Acc:F6UUD1]	ENSMMUT00000045564	621	764	+
ENSMMUG00000001665	SUCNR1	succinate receptor 1 [Source:HGNC Symbol;Acc:HGNC:4542]	ENSMMUT00000002359	801	950	+
ENSMMUG00000013253	PTPN11	Tyrosine-protein phosphatase non-receptor type 11; Uncharacterized protein [Source:UniProtKB/TrEMBL;Acc:F6ZJD8]	ENSMMUT00000018606	1161	1310	+
ENSMMUG00000017841		DDB1-and CUL4-associated factor 8; Uncharacterized protein [Source:UniProtKB/TrEMBL;Acc:F7DQC9]	ENSMMUT00000025072	321	750	+
ENSMMUG00000008505	OAS2	2'-5'-oligoadenylate synthetase 2, 69/71kDa [Source:HGNC Symbol;Acc:HGNC:8087]	ENSMMUT00000045555	2001	2440	+
ENSMMUG00000021852	PEX19	Uncharacterized protein [Source:UniProtKB/TrEMBL;Acc:F7EI07]	ENSMMUT00000030747	1461	1680	+
ENSMMUG00000021854	COPA	Uncharacterized protein [Source:UniProtKB/TrEMBL;Acc:F6WKP1]	ENSMMUT00000030749	3161	3380	+
ENSMMUG00000021795	DDX54	DEAD (Asp-Glu-Ala-Asp) box polypeptide 54 [Source:HGNC Symbol;Acc:HGNC:20084]	ENSMMUT00000030669	2705	2980	+
ENSMMUG00000015590	SIAH2	E3 ubiquitin-protein ligase SIAH2; Uncharacterized protein [Source:UniProtKB/TrEMBL;Acc:F6TED2]	ENSMMUT00000021864	841	1282	+
ENSMMUG00000017695	SERP1	Ribosome-associated membrane protein RAMP4-2; Stress-associated endoplasmic reticulum protein 1; Uncharacterized protein [Source:UniProtKB/TrEMBL;Acc:F6U9F6]	ENSMMUT00000024872	1471	1719	+
ENSMMUG00000001129	RITA1	RBPJ interacting and tubulin associated 1 [Source:HGNC Symbol;Acc:HGNC:25925]	ENSMMUT00000001594	411	650	+
ENSMMUG00000021856	NCSTN	Uncharacterized protein [Source:UniProtKB/TrEMBL;Acc:F6WKT8]	ENSMMUT00000030756	2281	2640	+
ENSMMUG00000017696	EIF2A	Uncharacterized protein [Source:UniProtKB/TrEMBL;Acc:F6U3K9]	ENSMMUT00000045550	1561	1780	+
ENSMMUG00000004435	TPCN1	two pore segment channel 1 [Source:HGNC Symbol;Acc:HGNC:18182]	ENSMMUT00000006288	2601	2800	+
ENSMMUG00000000294			ENSMMUT00000000431	566	690	+
ENSMMUG00000023335	RNF13	ring finger protein 13 [Source:HGNC Symbol;Acc:HGNC:10057]	ENSMMUT00000032825	751	1158	+
ENSMMUG00000018983	COMMD2	COMM domain-containing protein 2; Uncharacterized protein [Source:UniProtKB/TrEMBL;Acc:F6XXB1]	ENSMMUT00000026684	1001	1110	+
ENSMMUG00000017215	TM4SF1	transmembrane 4 L six family member 1 [Source:HGNC Symbol;Acc:HGNC:11853]	ENSMMUT00000024196	1408	1621	+
ENSMMUG00000031532		Uncharacterized protein [Source:UniProtKB/TrEMBL;Acc:F6WLA4]	ENSMMUT00000006972	243	377	+
ENSMMUG00000001906	MED13L	Mediator of RNA polymerase II transcription subunit 13-like; Uncharacterized protein [Source:UniProtKB/TrEMBL;Acc:F7FWX5]	ENSMMUT00000002694	6871	7240	+
ENSMMUG00000005528	HPS3	Hermansky-Pudlak syndrome 3 [Source:HGNC Symbol;Acc:HGNC:15597]	ENSMMUT00000007784	2711	2920	+
ENSMMUG00000005526	HLTF	helicase-like transcription factor [Source:HGNC Symbol;Acc:HGNC:11099]	ENSMMUT00000007782	2811	3010	+
ENSMMUG00000005521	GYG1	Uncharacterized protein [Source:UniProtKB/TrEMBL;Acc:F7GFD0]	ENSMMUT00000007776	1015	1203	+
ENSMMUG00000017479	FBXO21	F-box protein 21 [Source:HGNC Symbol;Acc:HGNC:13592]	ENSMMUT00000024578	1761	2220	+
ENSMMUG00000001996	F11R	Uncharacterized protein [Source:UniProtKB/TrEMBL;Acc:F6V265]	ENSMMUT00000002834	1511	1660	+
ENSMMUG00000011577	PLOD2	procollagen-lysine, 2-oxoglutarate 5-dioxygenase 2 [Source:HGNC Symbol;Acc:HGNC:9082]	ENSMMUT00000045528	1998	2160	+
ENSMMUG00000010235	RFC5	Replication factor C subunit 5 isoform 1; Uncharacterized protein [Source:UniProtKB/TrEMBL;Acc:F6QMV0]	ENSMMUT00000014309	1131	1319	+
ENSMMUG00000002003	USF1	Uncharacterized protein [Source:UniProtKB/TrEMBL;Acc:F6V1J8]	ENSMMUT00000002839	1321	1600	+
ENSMMUG00000017055	C2H3ORF58	Golgi protein GoPro49 isoform a; Uncharacterized protein [Source:UniProtKB/TrEMBL;Acc:F7HNR0]	ENSMMUT00000023972	1311	1610	+
ENSMMUG00000010236	WSB2	WD repeat and SOCS box containing 2 [Source:HGNC Symbol;Acc:HGNC:19222]	ENSMMUT00000014310	1051	1200	+
ENSMMUG00000009694	SLC9A9	Sodium/hydrogen exchanger [Source:UniProtKB/TrEMBL;Acc:F6WTB3]	ENSMMUT00000045526	2941	3130	+
ENSMMUG00000005098	PEBP1	Phosphatidylethanolamine-binding protein; Phosphatidylethanolamine-binding protein 1; Uncharacterized protein [Source:UniProtKB/TrEMBL;Acc:F5CI18]	ENSMMUT00000007191	1271	1390	+
ENSMMUG00000005099	TAOK3	TAO kinase 3 [Source:HGNC Symbol;Acc:HGNC:18133]	ENSMMUT00000007195	2081	2360	+
ENSMMUG00000002775	U2SURP	U2 snRNP-associated SURP domain containing [Source:HGNC Symbol;Acc:HGNC:30855]	ENSMMUT00000003941	2451	3110	+
ENSMMUG00000020629	SUDS3	suppressor of defective silencing 3 homolog (S. cerevisiae) [Source:HGNC Symbol;Acc:HGNC:29545]	ENSMMUT00000029024	341	560	+
ENSMMUG00000002010	DEDD	Death effector domain-containing protein; Uncharacterized protein [Source:UniProtKB/TrEMBL;Acc:F6UTR2]	ENSMMUT00000002848	971	1273	+
ENSMMUG00000019860	PRKAB1	5'-AMP-activated protein kinase subunit beta-1; Uncharacterized protein [Source:UniProtKB/TrEMBL;Acc:F7GTI4]	ENSMMUT00000027911	1061	1280	+
ENSMMUG00000019861	CIT	Uncharacterized protein [Source:UniProtKB/TrEMBL;Acc:F7GTI2]	ENSMMUT00000027913	5841	5970	+
ENSMMUG00000022631	USP21	ubiquitin specific peptidase 21 [Source:HGNC Symbol;Acc:HGNC:12620]	ENSMMUT00000045520	391	800	+
ENSMMUG00000022630	PPOX	protoporphyrinogen oxidase [Source:HGNC Symbol;Acc:HGNC:9280]	ENSMMUT00000045517	1	130	+
ENSMMUG00000014038	XRN1	5'-3' exoribonuclease 1 isoform b; Uncharacterized protein [Source:UniProtKB/TrEMBL;Acc:F6WU61]	ENSMMUT00000045513	2901	3020	+
ENSMMUG00000011210	RAB35	RAB35, member RAS oncogene family [Source:HGNC Symbol;Acc:HGNC:9774]	ENSMMUT00000045518	571	1136	+
ENSMMUG00000009152	GCN1L1	GCN1 general control of amino-acid synthesis 1-like 1 (yeast) [Source:HGNC Symbol;Acc:HGNC:4199]	ENSMMUT00000012805	8051	8430	+
ENSMMUG00000022629	B4GALT3	Uncharacterized protein [Source:UniProtKB/TrEMBL;Acc:F6WU79]	ENSMMUT00000031844	1341	1711	+
ENSMMUG00000009157	RPLP0	ribosomal protein, large, P0 [Source:HGNC Symbol;Acc:HGNC:10371]	ENSMMUT00000045510	451	700	+
ENSMMUG00000012151	GK5	Putative glycerol kinase 5; Uncharacterized protein [Source:UniProtKB/TrEMBL;Acc:F7GXV0]	ENSMMUT00000017024	1601	1700	+
ENSMMUG00000004520	NDUFS2	Uncharacterized protein [Source:UniProtKB/TrEMBL;Acc:F6SCT3]	ENSMMUT00000025476	1921	2040	+
ENSMMUG00000012256	ATP1B3	Uncharacterized protein [Source:UniProtKB/TrEMBL;Acc:F6V064]	ENSMMUT00000045508	1348	1486	+
ENSMMUG00000016494	SRSF9	Uncharacterized protein [Source:UniProtKB/TrEMBL;Acc:F7G4A1]	ENSMMUT00000023167	1	339	+
ENSMMUG00000004223	RNF10	RING finger protein 10; Uncharacterized protein [Source:UniProtKB/TrEMBL;Acc:F6TJ77]	ENSMMUT00000045497	2207	2430	+
ENSMMUG00000018126	TOMM40L	Mitochondrial import receptor subunit TOM40B; Uncharacterized protein [Source:UniProtKB/TrEMBL;Acc:F7FCD5]	ENSMMUT00000045499	2301	2626	+
ENSMMUG00000000287	NMNAT3	Uncharacterized protein [Source:UniProtKB/TrEMBL;Acc:F6X0R2]	ENSMMUT00000000421	1081	1280	+
ENSMMUG00000003051	COPB2	coatomer protein complex, subunit beta 2 (beta prime) [Source:HGNC Symbol;Acc:HGNC:2232]	ENSMMUT00000004320	2481	2930	+
ENSMMUG00000003048	MRPS22	28S ribosomal protein S22, mitochondrial; Uncharacterized protein [Source:UniProtKB/TrEMBL;Acc:F6VEV8]	ENSMMUT00000004317	921	1071	+
ENSMMUG00000000183	MLEC	Malectin; Uncharacterized protein [Source:UniProtKB/TrEMBL;Acc:F7HJM2]	ENSMMUT00000000273	911	1050	+
ENSMMUG00000020648	ACADS	Uncharacterized protein [Source:UniProtKB/TrEMBL;Acc:F6TRA8]	ENSMMUT00000029046	1206	1517	+
ENSMMUG00000012411	SDHC	Succinate dehydrogenase cytochrome b560 subunit, mitochondrial isoform 2; Uncharacterized protein [Source:UniProtKB/TrEMBL;Acc:F6TR99]	ENSMMUT00000017397	931	1125	+
ENSMMUG00000020650	SPPL3	Uncharacterized protein [Source:UniProtKB/TrEMBL;Acc:F6TRI6]	ENSMMUT00000029047	1194	1628	+
ENSMMUG00000007760	CEP70	Centrosomal protein of 70 kDa; Uncharacterized protein [Source:UniProtKB/TrEMBL;Acc:F7BWK0]	ENSMMUT00000010866	371	670	+
ENSMMUG00000021285	ARMC8	Uncharacterized protein [Source:UniProtKB/TrEMBL;Acc:F6V8J7]	ENSMMUT00000003963	2011	2280	+
ENSMMUG00000004042	FCRLA	Fc receptor-like A [Source:HGNC Symbol;Acc:HGNC:18504]	ENSMMUT00000005728	561	750	+
ENSMMUG00000021284	DBR1	Lariat debranching enzyme; Uncharacterized protein [Source:UniProtKB/TrEMBL;Acc:F6V8K9]	ENSMMUT00000029946	1431	1611	+
ENSMMUG00000016969	CAMKK2	calcium/calmodulin-dependent protein kinase kinase 2, beta [Source:HGNC Symbol;Acc:HGNC:1470]	ENSMMUT00000045468	3501	3710	+
ENSMMUG00000004047	DUSP12	dual specificity phosphatase 12 [Source:HGNC Symbol;Acc:HGNC:3067]	ENSMMUT00000005743	941	1081	+
ENSMMUG00000004049	ATF6	Uncharacterized protein [Source:UniProtKB/TrEMBL;Acc:F6ZR51]	ENSMMUT00000005748	1751	2070	+
ENSMMUG00000019360	TMEM22	Transmembrane protein 22; Uncharacterized protein [Source:UniProtKB/TrEMBL;Acc:F6TAG1]	ENSMMUT00000027190	1431	1530	+
ENSMMUG00000003263	STAG1	stromal antigen 1 [Source:HGNC Symbol;Acc:HGNC:11354]	ENSMMUT00000004616	1171	1320	+
ENSMMUG00000019513	UHMK1	Uncharacterized protein [Source:UniProtKB/TrEMBL;Acc:F7CXV5]	ENSMMUT00000027409	2401	2520	+
ENSMMUG00000003262	PCCB	Propionyl-CoA carboxylase beta chain, mitochondrial isoform 1; Uncharacterized protein [Source:UniProtKB/TrEMBL;Acc:F7DJ09]	ENSMMUT00000004614	1561	1790	+
ENSMMUG00000019514	UAP1	UDP-N-acetylhexosamine pyrophosphorylase; Uncharacterized protein [Source:UniProtKB/TrEMBL;Acc:F7CXU2]	ENSMMUT00000027411	1951	2100	+
ENSMMUG00000019090		Uncharacterized protein [Source:UniProtKB/TrEMBL;Acc:F6QD77]	ENSMMUT00000045464	2131	2353	+
ENSMMUG00000021563	RNF34	Uncharacterized protein [Source:UniProtKB/TrEMBL;Acc:F7F6I1]	ENSMMUT00000030345	361	500	+
ENSMMUG00000021564	KDM2B	Uncharacterized protein [Source:UniProtKB/TrEMBL;Acc:F7EGM6]	ENSMMUT00000045460	4201	4400	+
ENSMMUG00000000933	MSL2	Male-specific lethal 2 homolog isoform 1; Uncharacterized protein [Source:UniProtKB/TrEMBL;Acc:F6R6H5]	ENSMMUT00000001331	1701	1830	+
ENSMMUG00000031509	HIST3H2A	Histone H2A [Source:UniProtKB/TrEMBL;Acc:F7BRG1]	ENSMMUT00000002048	381	710	+
ENSMMUG00000031508		Uncharacterized protein [Source:UniProtKB/TrEMBL;Acc:F7EHY7]	ENSMMUT00000030751	413	549	+
ENSMMUG00000001306	ORAI1	Uncharacterized protein [Source:UniProtKB/TrEMBL;Acc:F7BNH0]	ENSMMUT00000001846	741	1177	+
ENSMMUG00000012652	MLXIP	MLX interacting protein [Source:HGNC Symbol;Acc:HGNC:17055]	ENSMMUT00000017744	3191	3620	+
ENSMMUG00000012750	ANAPC13	Anaphase-promoting complex subunit 13; Uncharacterized protein [Source:UniProtKB/TrEMBL;Acc:F7ENP2]	ENSMMUT00000017885	599	1003	+
ENSMMUG00000018037	VPS33A	Diablo homolog, mitochondrial isoform 1; Uncharacterized protein [Source:UniProtKB/TrEMBL;Acc:F7E7K2]	ENSMMUT00000029577	1971	2220	+
ENSMMUG00000023087	C1ORF69	Uncharacterized protein [Source:UniProtKB/TrEMBL;Acc:F6URQ3]	ENSMMUT00000032482	811	1010	+
ENSMMUG00000008918	SRPRB	Signal recognition particle receptor subunit beta; Uncharacterized protein [Source:UniProtKB/TrEMBL;Acc:F7DHR2]	ENSMMUT00000012467	638	1018	+
ENSMMUG00000000059	TOPBP1	DNA topoisomerase 2-binding protein 1; Uncharacterized protein [Source:UniProtKB/TrEMBL;Acc:F7HM93]	ENSMMUT00000000085	4561	4790	+
ENSMMUG00000021928	CLIP1	CAP-GLY domain containing linker protein 1 [Source:HGNC Symbol;Acc:HGNC:10461]	ENSMMUT00000030851	1771	2120	+
ENSMMUG00000002790	MRPL55	mitochondrial ribosomal protein L55 [Source:HGNC Symbol;Acc:HGNC:16686]	ENSMMUT00000045434	1071	1249	+
ENSMMUG00000000058			ENSMMUT00000000082	1531	1970	+
ENSMMUG00000002791	C1H1ORF35	Uncharacterized protein [Source:UniProtKB/TrEMBL;Acc:F7GI10]	ENSMMUT00000003960	681	860	+
ENSMMUG00000013643	ZCCHC8	zinc finger, CCHC domain containing 8 [Source:HGNC Symbol;Acc:HGNC:25265]	ENSMMUT00000019148	2281	2430	+
ENSMMUG00000002792			ENSMMUT00000003961	511	710	+
ENSMMUG00000007556	KNTC1	kinetochore associated 1 [Source:HGNC Symbol;Acc:HGNC:17255]	ENSMMUT00000010566	5821	5940	+
ENSMMUG00000001869	SNAP47	Uncharacterized protein [Source:UniProtKB/TrEMBL;Acc:F7GK63]	ENSMMUT00000002631	2041	2140	+
ENSMMUG00000031499	DENR	density-regulated protein [Source:HGNC Symbol;Acc:HGNC:2769]	ENSMMUT00000045423	181	390	+
ENSMMUG00000001867	JMJD4	Uncharacterized protein [Source:UniProtKB/TrEMBL;Acc:F7GP81]	ENSMMUT00000002630	1281	1503	+
ENSMMUG00000015221	HIP1R	huntingtin interacting protein 1 related [Source:HGNC Symbol;Acc:HGNC:18415]	ENSMMUT00000021340	1201	1400	+
ENSMMUG00000021771	UBA5	ubiquitin-like modifier activating enzyme 5 [Source:HGNC Symbol;Acc:HGNC:23230]	ENSMMUT00000030632	11	170	+
ENSMMUG00000015930	ARL6IP4	ADP-ribosylation factor-like 6 interacting protein 4 [Source:HGNC Symbol;Acc:HGNC:18076]	ENSMMUT00000022398	821	962	+
ENSMMUG00000019678	MPHOSPH9	Uncharacterized protein [Source:UniProtKB/TrEMBL;Acc:F7CH33]	ENSMMUT00000027641	2841	3000	+
ENSMMUG00000008636	ADCK3	Chaperone activity of bc1 complex-like, mitochondrial; Uncharacterized protein [Source:UniProtKB/TrEMBL;Acc:F7F8M4]	ENSMMUT00000012079	1971	2210	+
ENSMMUG00000001154	NUDT16	U8 snoRNA-decapping enzyme isoform 2; Uncharacterized protein [Source:UniProtKB/TrEMBL;Acc:F6RQ47]	ENSMMUT00000001625	531	738	+
ENSMMUG00000000434	CDK2AP1	Uncharacterized protein [Source:UniProtKB/TrEMBL;Acc:F7A6I0]	ENSMMUT00000000632	811	1000	+
ENSMMUG00000011496	SBNO1	strawberry notch homolog 1 (Drosophila) [Source:HGNC Symbol;Acc:HGNC:22973]	ENSMMUT00000016098	2011	2400	+
ENSMMUG00000018525	PSEN2	Uncharacterized protein [Source:UniProtKB/TrEMBL;Acc:F7A2D1]	ENSMMUT00000045407	1826	2010	+
ENSMMUG00000005137	ATP2C1	Uncharacterized protein [Source:UniProtKB/TrEMBL;Acc:F6YCV0]	ENSMMUT00000007242	3211	3380	+
ENSMMUG00000031491	TMED2	transmembrane emp24 domain trafficking protein 2 [Source:HGNC Symbol;Acc:HGNC:16996]	ENSMMUT00000045404	351	533	+
ENSMMUG00000013178	DDX55	DEAD (Asp-Glu-Ala-Asp) box polypeptide 55 [Source:HGNC Symbol;Acc:HGNC:20085]	ENSMMUT00000018486	1391	1870	+
ENSMMUG00000020294	PIK3R4	phosphoinositide-3-kinase, regulatory subunit 4 [Source:HGNC Symbol;Acc:HGNC:8982]	ENSMMUT00000028545	1031	1280	+
ENSMMUG00000021820	PARP1	poly (ADP-ribose) polymerase 1 [Source:HGNC Symbol;Acc:HGNC:270]	ENSMMUT00000030705	1321	1520	+
ENSMMUG00000013181	EIF2B1	eukaryotic translation initiation factor 2B, subunit 1 alpha, 26kDa [Source:HGNC Symbol;Acc:HGNC:3257]	ENSMMUT00000018489	1346	1590	+
ENSMMUG00000006546	ATP6V0A2	Uncharacterized protein [Source:UniProtKB/TrEMBL;Acc:F7HS27]	ENSMMUT00000009171	491	730	+
ENSMMUG00000002560	SPOPL	Speckle-type POZ protein-like; Uncharacterized protein [Source:UniProtKB/TrEMBL;Acc:F7HSR0]	ENSMMUT00000003641	1131	1332	+
ENSMMUG00000004933	METTL6	Uncharacterized protein [Source:UniProtKB/TrEMBL;Acc:F7CDC5]	ENSMMUT00000006960	161	470	+
ENSMMUG00000020761	EAF1	Uncharacterized protein [Source:UniProtKB/TrEMBL;Acc:F7HEH0]	ENSMMUT00000029201	1121	1300	+
ENSMMUG00000009213	ZNF664	Uncharacterized protein [Source:UniProtKB/TrEMBL;Acc:F7HJR3]	ENSMMUT00000012881	411	590	+
ENSMMUG00000019058	ACBD3	Uncharacterized protein [Source:UniProtKB/TrEMBL;Acc:F6QTK2]	ENSMMUT00000026776	1001	1570	+
ENSMMUG00000023107	NCOR2	nuclear receptor corepressor 2 [Source:HGNC Symbol;Acc:HGNC:7673]	ENSMMUT00000045391	8071	8256	+
ENSMMUG00000021330	KYNU	Kynureninase [Source:UniProtKB/TrEMBL;Acc:F6URB1]	ENSMMUT00000030020	261	390	+
ENSMMUG00000031483	H3F3B	H3 histone, family 3B (H3.3B) [Source:HGNC Symbol;Acc:HGNC:4765]	ENSMMUT00000045394	1	140	+
ENSMMUG00000006528	ARHGAP15	Rho GTPase-activating protein 15; Uncharacterized protein [Source:UniProtKB/TrEMBL;Acc:F7H6M3]	ENSMMUT00000009146	201	390	+
ENSMMUG00000017148	SDE2	SDE2 telomere maintenance homolog (S. pombe) [Source:HGNC Symbol;Acc:HGNC:26643]	ENSMMUT00000045392	1211	1340	+
ENSMMUG00000016486	SCARB1	scavenger receptor class B, member 1 [Source:HGNC Symbol;Acc:HGNC:1664]	ENSMMUT00000045387	1001	1210	+
ENSMMUG00000011434	PYCR2	Uncharacterized protein [Source:UniProtKB/TrEMBL;Acc:F7BA50]	ENSMMUT00000045383	1357	1577	+
ENSMMUG00000017902	DHX37	Uncharacterized protein [Source:UniProtKB/TrEMBL;Acc:F7F112]	ENSMMUT00000025156	3601	3820	+
ENSMMUG00000005213	BRI3BP	Uncharacterized protein [Source:UniProtKB/TrEMBL;Acc:F7CM63]	ENSMMUT00000007339	574	810	+
ENSMMUG00000022519		Uncharacterized protein [Source:UniProtKB/TrEMBL;Acc:F6YNW6]	ENSMMUT00000031678	1091	1212	+
ENSMMUG00000011117	AACS	acetoacetyl-CoA synthetase [Source:HGNC Symbol;Acc:HGNC:21298]	ENSMMUT00000015538	2401	2690	+
ENSMMUG00000010691		Uncharacterized protein [Source:UniProtKB/TrEMBL;Acc:F7G5W7]	ENSMMUT00000014948	571	684	+
ENSMMUG00000006926			ENSMMUT00000009677	741	919	+
ENSMMUG00000021288	ANKRD28	ankyrin repeat domain 28 [Source:HGNC Symbol;Acc:HGNC:29024]	ENSMMUT00000012772	2991	3240	+
ENSMMUG00000000134	SRP9	Signal recognition particle 9 kDa protein [Source:UniProtKB/TrEMBL;Acc:F7G5Y8]	ENSMMUT00000045368	131	529	+
ENSMMUG00000005767	SLC15A4	solute carrier family 15 (oligopeptide transporter), member 4 [Source:HGNC Symbol;Acc:HGNC:23090]	ENSMMUT00000008097	1301	1820	+
ENSMMUG00000003472	LBR	Lamin-B receptor; Uncharacterized protein [Source:UniProtKB/TrEMBL;Acc:F7EBC6]	ENSMMUT00000004915	3511	3655	+
ENSMMUG00000022693	OXNAD1	Oxidoreductase NAD-binding domain-containing protein 1; Uncharacterized protein [Source:UniProtKB/TrEMBL;Acc:F7GSN7]	ENSMMUT00000031934	1191	1430	+
ENSMMUG00000023775	PLCL2	phospholipase C-like 2 [Source:HGNC Symbol;Acc:HGNC:9064]	ENSMMUT00000033461	1851	2050	+
ENSMMUG00000023776	TBC1D5	TBC1 domain family, member 5 [Source:HGNC Symbol;Acc:HGNC:19166]	ENSMMUT00000033462	2269	2540	+
ENSMMUG00000012227	WDR26	Uncharacterized protein [Source:UniProtKB/TrEMBL;Acc:F7G637]	ENSMMUT00000045356	3361	3630	+
ENSMMUG00000019009	SATB1	DNA-binding protein SATB1 isoform 1; Uncharacterized protein [Source:UniProtKB/TrEMBL;Acc:F6XW50]	ENSMMUT00000045357	2741	2900	+
ENSMMUG00000005633	MMADHC	Methylmalonic aciduria and homocystinuria type D protein, mitochondrial; Uncharacterized protein [Source:UniProtKB/TrEMBL;Acc:F6WCH6]	ENSMMUT00000045355	425	550	+
ENSMMUG00000009936	CNIH4	Uncharacterized protein [Source:UniProtKB/TrEMBL;Acc:F6Y4B7]	ENSMMUT00000013871	461	617	+
ENSMMUG00000006992	RAB5A	Ras-related protein Rab-5A; Uncharacterized protein [Source:UniProtKB/TrEMBL;Acc:F7DQ40]	ENSMMUT00000009768	921	1120	+
ENSMMUG00000022510	NVL	nuclear VCP-like [Source:HGNC Symbol;Acc:HGNC:8070]	ENSMMUT00000031669	1561	1750	+
ENSMMUG00000020343	SFSWAP	Splicing factor, suppressor of white-apricot homolog; Uncharacterized protein [Source:UniProtKB/TrEMBL;Acc:F6W9M1]	ENSMMUT00000028613	881	1000	+
ENSMMUG00000020341	SGOL1	shugoshin-like 1 (S. pombe) [Source:HGNC Symbol;Acc:HGNC:25088]	ENSMMUT00000045347	41	230	+
ENSMMUG00000010331	MMP17	matrix metallopeptidase 17 (membrane-inserted) [Source:HGNC Symbol;Acc:HGNC:7163]	ENSMMUT00000014451	1341	1540	+
ENSMMUG00000015773	ULK1	unc-51 like autophagy activating kinase 1 [Source:HGNC Symbol;Acc:HGNC:12558]	ENSMMUT00000022141	1431	1680	+
ENSMMUG00000031463	PUS1	tRNA pseudouridine synthase [Source:UniProtKB/TrEMBL;Acc:F7G6D4]	ENSMMUT00000045343	781	1020	+
ENSMMUG00000002400	DEGS1	Sphingolipid delta(4)-desaturase DES1; Uncharacterized protein [Source:UniProtKB/TrEMBL;Acc:F6PPX9]	ENSMMUT00000003410	951	1290	+
ENSMMUG00000000676	FBXO28	Uncharacterized protein [Source:UniProtKB/TrEMBL;Acc:F6Z0J2]	ENSMMUT00000000972	761	1356	+
ENSMMUG00000017729	EP400	Uncharacterized protein [Source:UniProtKB/TrEMBL;Acc:F7F7Y2]	ENSMMUT00000024923	7491	7650	+
ENSMMUG00000011146	TP53BP2	tumor protein p53 binding protein, 2 [Source:HGNC Symbol;Acc:HGNC:12000]	ENSMMUT00000015577	4031	4240	+
ENSMMUG00000006353	RPL15	ribosomal protein L15 [Source:HGNC Symbol;Acc:HGNC:10306]	ENSMMUT00000008913	671	770	+
ENSMMUG00000022240	NR1D2	Uncharacterized protein [Source:UniProtKB/TrEMBL;Acc:F6Z1J2]	ENSMMUT00000031284	811	1070	+
ENSMMUG00000006739	DDX51	DEAD (Asp-Glu-Ala-Asp) box polypeptide 51 [Source:HGNC Symbol;Acc:HGNC:20082]	ENSMMUT00000005660	1971	2300	+
ENSMMUG00000007371	TOP2B	Uncharacterized protein [Source:UniProtKB/TrEMBL;Acc:F7E563]	ENSMMUT00000010309	4461	4760	+
ENSMMUG00000005873	DISP1	Uncharacterized protein [Source:UniProtKB/TrEMBL;Acc:F6TLW0]	ENSMMUT00000008224	4301	4530	+
ENSMMUG00000015026	BROX	BRO1 domain-containing protein BROX; Uncharacterized protein [Source:UniProtKB/TrEMBL;Acc:F6V547]	ENSMMUT00000021067	1481	1690	+
ENSMMUG00000014790	NGLY1	N-glycanase 1 [Source:HGNC Symbol;Acc:HGNC:17646]	ENSMMUT00000020754	611	740	+
ENSMMUG00000010521	ARL5A	ADP-ribosylation factor-like 5A [Source:HGNC Symbol;Acc:HGNC:696]	ENSMMUT00000014723	761	918	+
ENSMMUG00000015463			ENSMMUT00000021685	1370	1556	+
ENSMMUG00000015467	ANKLE2	ankyrin repeat and LEM domain containing 2 [Source:HGNC Symbol;Acc:HGNC:29101]	ENSMMUT00000021691	671	1080	+
ENSMMUG00000004379	DUSP10	Uncharacterized protein [Source:UniProtKB/TrEMBL;Acc:F7FRL4]	ENSMMUT00000006220	711	840	+
ENSMMUG00000031451	GOLGA3	Uncharacterized protein [Source:UniProtKB/TrEMBL;Acc:F7GA16]	ENSMMUT00000045319	4411	4595	+
ENSMMUG00000019327	SLC4A7	Uncharacterized protein [Source:UniProtKB/TrEMBL;Acc:F6RVT7]	ENSMMUT00000027141	3371	3520	+
ENSMMUG00000020182	HLX	Uncharacterized protein [Source:UniProtKB/TrEMBL;Acc:F6UPM6]	ENSMMUT00000028397	1011	1260	+
ENSMMUG00000010812	PRPF40A	PRP40 pre-mRNA processing factor 40 homolog A (S. cerevisiae) [Source:HGNC Symbol;Acc:HGNC:16463]	ENSMMUT00000045318	2607	2760	+
ENSMMUG00000015468	CHFR	checkpoint with forkhead and ring finger domains, E3 ubiquitin protein ligase [Source:HGNC Symbol;Acc:HGNC:20455]	ENSMMUT00000045312	2331	2430	+
ENSMMUG00000031450		Uncharacterized protein [Source:UniProtKB/TrEMBL;Acc:F7GD62]	ENSMMUT00000045313	170	310	+
ENSMMUG00000011607	NR4A2	Nuclear receptor subfamily 4 group A member 2; Uncharacterized protein [Source:UniProtKB/TrEMBL;Acc:F6PLH4]	ENSMMUT00000016263	2051	2430	+
ENSMMUG00000003150	ZNF140	zinc finger protein 140 [Source:HGNC Symbol;Acc:HGNC:12925]	ENSMMUT00000004464	671	870	+
ENSMMUG00000007784	RAB3GAP2	RAB3 GTPase activating protein subunit 2 (non-catalytic) [Source:HGNC Symbol;Acc:HGNC:17168]	ENSMMUT00000045297	4801	4990	+
ENSMMUG00000004897	GPD2	Glycerol-3-phosphate dehydrogenase, mitochondrial; Uncharacterized protein [Source:UniProtKB/TrEMBL;Acc:F7CJI8]	ENSMMUT00000006917	2097	2364	+
ENSMMUG00000010031	TGFBR2	Uncharacterized protein [Source:UniProtKB/TrEMBL;Acc:F6Q193]	ENSMMUT00000014004	1101	1290	+
ENSMMUG00000008607		Uncharacterized protein [Source:UniProtKB/TrEMBL;Acc:F6UAL5]	ENSMMUT00000012033	1026	1157	+
ENSMMUG00000008608	STT3B	STT3B, subunit of the oligosaccharyltransferase complex (catalytic) [Source:HGNC Symbol;Acc:HGNC:30611]	ENSMMUT00000012035	2201	2500	+
ENSMMUG00000014176	CYTIP	Uncharacterized protein [Source:UniProtKB/TrEMBL;Acc:F7AT53]	ENSMMUT00000019894	701	850	+
ENSMMUG00000007783	IARS2	isoleucyl-tRNA synthetase 2, mitochondrial [Source:HGNC Symbol;Acc:HGNC:29685]	ENSMMUT00000010899	2701	2988	+
ENSMMUG00000001443	CMTM6	CKLF-like MARVEL transmembrane domain-containing protein 6; Uncharacterized protein [Source:UniProtKB/TrEMBL;Acc:F7BRV9]	ENSMMUT00000002044	1371	1540	+
ENSMMUG00000008722	EPRS	glutamyl-prolyl-tRNA synthetase [Source:HGNC Symbol;Acc:HGNC:3418]	ENSMMUT00000012189	2881	3150	+
ENSMMUG00000006596	CNOT10	CCR4-NOT transcription complex subunit 10; Uncharacterized protein [Source:UniProtKB/TrEMBL;Acc:F7GGC1]	ENSMMUT00000045291	2441	2600	+
ENSMMUG00000011638	PKP4	plakophilin 4 [Source:HGNC Symbol;Acc:HGNC:9026]	ENSMMUT00000016310	2281	2440	+
ENSMMUG00000002316	PCMTD2	Protein-L-isoaspartate O-methyltransferase domain-containing protein 2 isoform 1; Uncharacterized protein [Source:UniProtKB/TrEMBL;Acc:F7D8R1]	ENSMMUT00000003277	771	1010	+
ENSMMUG00000016917	UBP1	Uncharacterized protein; Upstream-binding protein 1 isoform b [Source:UniProtKB/TrEMBL;Acc:F7CJ26]	ENSMMUT00000045283	2412	2854	+
ENSMMUG00000031438	CLASP2	Uncharacterized protein [Source:UniProtKB/TrEMBL;Acc:F6VGJ2]	ENSMMUT00000002795	2301	2479	+
ENSMMUG00000018878	TCEA2	Uncharacterized protein [Source:UniProtKB/TrEMBL;Acc:F6WYS1]	ENSMMUT00000026540	21	230	+
ENSMMUG00000022639	KCTD3	Uncharacterized protein [Source:UniProtKB/TrEMBL;Acc:F7FRD8]	ENSMMUT00000031856	2151	2753	+
ENSMMUG00000015558	PRPF6	pre-mRNA processing factor 6 [Source:HGNC Symbol;Acc:HGNC:15860]	ENSMMUT00000021821	321	480	+
ENSMMUG00000015556	ZNF512B	zinc finger protein 512B [Source:HGNC Symbol;Acc:HGNC:29212]	ENSMMUT00000021816	2441	2740	+
ENSMMUG00000020719	2015-03-07	membrane-associated ring finger (C3HC4) 7, E3 ubiquitin protein ligase [Source:HGNC Symbol;Acc:HGNC:17393]	ENSMMUT00000029145	1621	1880	+
ENSMMUG00000015551	UCKL1	uridine-cytidine kinase 1-like 1 [Source:HGNC Symbol;Acc:HGNC:15938]	ENSMMUT00000021810	1	140	+
ENSMMUG00000020721		Uncharacterized protein [Source:UniProtKB/TrEMBL;Acc:F6PSN6]	ENSMMUT00000029147	4651	4830	+
ENSMMUG00000003702		Uncharacterized protein [Source:UniProtKB/TrEMBL;Acc:F6SFF8]	ENSMMUT00000027941	1445	1617	+
ENSMMUG00000020711	SLC2A4RG	SLC2A4 regulator [Source:HGNC Symbol;Acc:HGNC:15930]	ENSMMUT00000029136	921	1030	+
ENSMMUG00000000171	ZGPAT	zinc finger, CCCH-type with G patch domain [Source:HGNC Symbol;Acc:HGNC:15948]	ENSMMUT00000000256	3111	3390	+
ENSMMUG00000005210	RPS6KC1	ribosomal protein S6 kinase, 52kDa, polypeptide 1 [Source:HGNC Symbol;Acc:HGNC:10439]	ENSMMUT00000007336	2481	2690	+
ENSMMUG00000000169	ARFRP1	ADP-ribosylation factor related protein 1 [Source:HGNC Symbol;Acc:HGNC:662]	ENSMMUT00000000251	901	1020	+
ENSMMUG00000000167	RTEL1	regulator of telomere elongation helicase 1 [Source:HGNC Symbol;Acc:HGNC:15888]	ENSMMUT00000000246	3451	3660	+
ENSMMUG00000011735	ANGEL2	angel homolog 2 (Drosophila) [Source:HGNC Symbol;Acc:HGNC:30534]	ENSMMUT00000016433	1471	1594	+
ENSMMUG00000014905	ST6GAL1	Beta-galactoside alpha-2,6-sialyltransferase 1 isoform a; Uncharacterized protein [Source:UniProtKB/TrEMBL;Acc:F6TW24]	ENSMMUT00000020911	431	580	+
ENSMMUG00000019287	NSL1	NSL1, MIS12 kinetochore complex component [Source:HGNC Symbol;Acc:HGNC:24548]	ENSMMUT00000027089	661	890	+
ENSMMUG00000013007	RTP4	receptor (chemosensory) transporter protein 4 [Source:HGNC Symbol;Acc:HGNC:23992]	ENSMMUT00000018242	531	760	+
ENSMMUG00000009198	BCL6	B-cell lymphoma 6 protein isoform 1; Uncharacterized protein [Source:UniProtKB/TrEMBL;Acc:F7HM62]	ENSMMUT00000012862	1671	1850	+
ENSMMUG00000006168	GMEB2	glucocorticoid modulatory element binding protein 2 [Source:HGNC Symbol;Acc:HGNC:4371]	ENSMMUT00000008626	1438	1600	+
ENSMMUG00000015056	BATF3	Uncharacterized protein [Source:UniProtKB/TrEMBL;Acc:F6TKQ3]	ENSMMUT00000021102	521	620	+
ENSMMUG00000006070	PRIC285	Uncharacterized protein [Source:UniProtKB/TrEMBL;Acc:F6W2L0]	ENSMMUT00000008486	4765	4970	+
ENSMMUG00000012185	ATF3	Uncharacterized protein [Source:UniProtKB/TrEMBL;Acc:F7FN44]	ENSMMUT00000045259	546	1140	+
ENSMMUG00000006064	PPDPF	Pancreatic progenitor cell differentiation and proliferation factor; Uncharacterized protein [Source:UniProtKB/TrEMBL;Acc:F6W3F1]	ENSMMUT00000008475	651	760	+
ENSMMUG00000002141	TMEM206	transmembrane protein 206 [Source:HGNC Symbol;Acc:HGNC:25593]	ENSMMUT00000003024	881	1010	+
ENSMMUG00000019771	PPP2R5A	Serine/threonine-protein phosphatase 2A 56 kDa regulatory subunit alpha isoform isoform 1; Uncharacterized protein [Source:UniProtKB/TrEMBL;Acc:F7APV7]	ENSMMUT00000027790	1585	1940	+
ENSMMUG00000010176	DTL	Denticleless protein homolog; Uncharacterized protein [Source:UniProtKB/TrEMBL;Acc:F6SRD8]	ENSMMUT00000014207	1271	2190	+
ENSMMUG00000010174	INTS7	integrator complex subunit 7 [Source:HGNC Symbol;Acc:HGNC:24484]	ENSMMUT00000045249	2571	3092	+
ENSMMUG00000003202	IFIH1	Macaca mulatta interferon induced with helicase C domain 1 (IFIH1), mRNA. [Source:RefSeq mRNA;Acc:NM_001047123]	ENSMMUT00000004537	301	510	+
ENSMMUG00000005216	NEK2	Serine/threonine-protein kinase Nek2 isoform 1; Uncharacterized protein [Source:UniProtKB/TrEMBL;Acc:F7C8J4]	ENSMMUT00000007344	1481	1610	+
ENSMMUG00000000868	SLC30A1	Uncharacterized protein [Source:UniProtKB/TrEMBL;Acc:F6TFE8]	ENSMMUT00000001239	1281	1460	+
ENSMMUG00000031427	TRAF5	TNF receptor-associated factor 5 [Source:HGNC Symbol;Acc:HGNC:12035]	ENSMMUT00000045246	1551	1720	+
ENSMMUG00000015330	CCDC50	Coiled-coil domain-containing protein 50 short isoform; Uncharacterized protein [Source:UniProtKB/TrEMBL;Acc:F6SPZ0]	ENSMMUT00000021498	1681	1920	+
ENSMMUG00000020383	RCOR3	Uncharacterized protein [Source:UniProtKB/TrEMBL;Acc:F6UG88]	ENSMMUT00000028663	1451	1861	+
ENSMMUG00000015911	ARFGAP1	ADP-ribosylation factor GTPase-activating protein 1 isoform a; Uncharacterized protein [Source:UniProtKB/TrEMBL;Acc:F7AMI0]	ENSMMUT00000022360	1431	1730	+
ENSMMUG00000017867		Uncharacterized protein [Source:UniProtKB/TrEMBL;Acc:F7DPM8]	ENSMMUT00000025109	281	390	+
ENSMMUG00000009227	YTHDF1	Uncharacterized protein; YTH domain family protein 1 [Source:UniProtKB/TrEMBL;Acc:F7FNP8]	ENSMMUT00000045241	1761	1940	+
ENSMMUG00000018840	SCN3A	Uncharacterized protein [Source:UniProtKB/TrEMBL;Acc:F6ZAM3]	ENSMMUT00000026491	6291	6510	+
ENSMMUG00000005712	GID8	Protein C20orf11; Two hybrid-associated protein 1 with RanBPM; Uncharacterized protein [Source:UniProtKB/TrEMBL;Acc:F6U494]	ENSMMUT00000008016	561	890	+
ENSMMUG00000019310	DIDO1	Uncharacterized protein [Source:UniProtKB/TrEMBL;Acc:F6S3P4]	ENSMMUT00000027116	6379	6880	+
ENSMMUG00000009765	OPA1	Uncharacterized protein [Source:UniProtKB/TrEMBL;Acc:F6Y1N8]	ENSMMUT00000013660	2931	3030	+
ENSMMUG00000022065	IRF6	Interferon regulatory factor 6 isoform 1; Uncharacterized protein [Source:UniProtKB/TrEMBL;Acc:F7FP28]	ENSMMUT00000031042	971	1200	+
ENSMMUG00000016848	SLCO4A1	solute carrier organic anion transporter family, member 4A1 [Source:HGNC Symbol;Acc:HGNC:10953]	ENSMMUT00000023672	2231	2490	+
ENSMMUG00000012032	ATP13A3	ATPase type 13A3 [Source:HGNC Symbol;Acc:HGNC:24113]	ENSMMUT00000016854	3446	3716	+
ENSMMUG00000019177	GALNT3	Uncharacterized protein [Source:UniProtKB/TrEMBL;Acc:F6R679]	ENSMMUT00000026944	81	410	+
ENSMMUG00000005006	RPS21	ribosomal protein S21 [Source:HGNC Symbol;Acc:HGNC:10409]	ENSMMUT00000007061	301	410	+
ENSMMUG00000010708	LSG1	large 60S subunit nuclear export GTPase 1 [Source:HGNC Symbol;Acc:HGNC:25652]	ENSMMUT00000014978	1831	2020	+
ENSMMUG00000031415	APOD	Apolipoprotein D; Uncharacterized protein [Source:UniProtKB/TrEMBL;Acc:F7FST1]	ENSMMUT00000045215	511	620	+
ENSMMUG00000002021	BDH1	3-hydroxybutyrate dehydrogenase, type 1 [Source:HGNC Symbol;Acc:HGNC:1027]	ENSMMUT00000002862	861	1030	+
ENSMMUG00000016585	DLG1	Uncharacterized protein [Source:UniProtKB/TrEMBL;Acc:F6VPE3]	ENSMMUT00000023290	2231	2520	+
ENSMMUG00000012623	OSBPL2	oxysterol binding protein-like 2 [Source:HGNC Symbol;Acc:HGNC:15761]	ENSMMUT00000017707	1921	2105	+
ENSMMUG00000006215	STK39	serine threonine kinase 39 [Source:HGNC Symbol;Acc:HGNC:17717]	ENSMMUT00000008694	1841	2030	+
ENSMMUG00000031409	PIGZ	phosphatidylinositol glycan anchor biosynthesis, class Z [Source:HGNC Symbol;Acc:HGNC:30596]	ENSMMUT00000045206	661	840	+
ENSMMUG00000014338	LASS6	Uncharacterized protein [Source:UniProtKB/TrEMBL;Acc:F7CYG3]	ENSMMUT00000045202	1251	1460	+
ENSMMUG00000012607	MTG2	mitochondrial ribosome-associated GTPase 2 [Source:HGNC Symbol;Acc:HGNC:16239]	ENSMMUT00000017676	861	1150	+
ENSMMUG00000018354	PSMA7	Uncharacterized protein [Source:UniProtKB/TrEMBL;Acc:F7H3W3]	ENSMMUT00000025794	461	646	+
ENSMMUG00000014084	LSM14B	Uncharacterized protein [Source:UniProtKB/TrEMBL;Acc:F7CDJ6]	ENSMMUT00000019776	781	1120	+
ENSMMUG00000019100	UBXN7	UBX domain protein 7 [Source:HGNC Symbol;Acc:HGNC:29119]	ENSMMUT00000026843	931	1420	+
ENSMMUG00000002114	TFRC	Transferrin receptor 1; Transferrin receptor protein 1; Uncharacterized protein [Source:UniProtKB/TrEMBL;Acc:F6UX47]	ENSMMUT00000002982	2141	2430	+
ENSMMUG00000023567	MAPKAPK2	mitogen-activated protein kinase-activated protein kinase 2 [Source:HGNC Symbol;Acc:HGNC:6887]	ENSMMUT00000033149	1261	1638	+
ENSMMUG00000000972	TNK2	Uncharacterized protein [Source:UniProtKB/TrEMBL;Acc:F6SXS0]	ENSMMUT00000045187	1801	2190	+
ENSMMUG00000002528	EIF2D	Uncharacterized protein [Source:UniProtKB/TrEMBL;Acc:F7GM46]	ENSMMUT00000003596	761	930	+
ENSMMUG00000013185	ATP5E	Macaca mulatta H+ transporting F1 ATP synthase epsilon subunit (ATP5E), mRNA. [Source:RefSeq mRNA;Acc:NM_001032901]	ENSMMUT00000018497	301	410	+
ENSMMUG00000015390	NELFCD	negative elongation factor complex member C/D [Source:HGNC Symbol;Acc:HGNC:15934]	ENSMMUT00000021578	1851	2153	+
ENSMMUG00000010266	GNAS1	Uncharacterized protein [Source:UniProtKB/TrEMBL;Acc:F6PUT7]	ENSMMUT00000014360	2861	3040	+
ENSMMUG00000002526	IKBKE	Uncharacterized protein [Source:UniProtKB/TrEMBL;Acc:F7GM52]	ENSMMUT00000003591	1031	1430	+
ENSMMUG00000023062	UBR3	Uncharacterized protein [Source:UniProtKB/TrEMBL;Acc:F7GM61]	ENSMMUT00000032452	1431	1620	+
ENSMMUG00000004318			ENSMMUT00000045165	54	760	+
ENSMMUG00000001833	STX16	Uncharacterized protein [Source:UniProtKB/TrEMBL;Acc:F7GQX4]	ENSMMUT00000002581	1181	1400	+
ENSMMUG00000004986	VAPB	Uncharacterized protein [Source:UniProtKB/TrEMBL;Acc:F7ATV3]	ENSMMUT00000007029	1511	1771	+
ENSMMUG00000000125	RAB22A	Ras-related protein Rab-22A; Uncharacterized protein [Source:UniProtKB/TrEMBL;Acc:F7H676]	ENSMMUT00000000180	531	860	+
ENSMMUG00000019944	PPP4R1	Putative serine/threonine-protein phosphatase 4 regulatory subunit 1-like protein; Uncharacterized protein [Source:UniProtKB/TrEMBL;Acc:F7FZT4]	ENSMMUT00000028028	1731	1928	+
ENSMMUG00000021426	SLC41A1	Solute carrier family 41 member 1; Uncharacterized protein [Source:UniProtKB/TrEMBL;Acc:F7EEX1]	ENSMMUT00000030159	4411	4640	+
ENSMMUG00000021227	RAB7L1	Ras-related protein Rab-7L1 isoform 1; Uncharacterized protein [Source:UniProtKB/TrEMBL;Acc:F7HTT7]	ENSMMUT00000029866	871	1110	+
ENSMMUG00000031391	RBM38	RNA-binding protein 38 isoform a; Uncharacterized protein [Source:UniProtKB/TrEMBL;Acc:F7GMA4]	ENSMMUT00000045156	1221	1420	+
ENSMMUG00000015203	GORASP2	Uncharacterized protein [Source:UniProtKB/TrEMBL;Acc:F6W3P7]	ENSMMUT00000045152	1211	1500	+
ENSMMUG00000000252	RAE1	Uncharacterized protein; mRNA export factor; mRNA-associated protein mrnp 41 [Source:UniProtKB/TrEMBL;Acc:F6X9Q4]	ENSMMUT00000000372	1341	1700	+
ENSMMUG00000001024	ELK4	ETS domain-containing protein Elk-4 isoform a; Uncharacterized protein [Source:UniProtKB/TrEMBL;Acc:F6XTS0]	ENSMMUT00000005840	851	970	+
ENSMMUG00000011189	TLK1	Uncharacterized protein [Source:UniProtKB/TrEMBL;Acc:F6V0J6]	ENSMMUT00000015657	2111	2260	+
ENSMMUG00000023370	DCAF17	DDB1 and CUL4 associated factor 17 [Source:HGNC Symbol;Acc:HGNC:25784]	ENSMMUT00000032881	911	1030	+
ENSMMUG00000007295	CYBRD1	Uncharacterized protein [Source:UniProtKB/TrEMBL;Acc:F7F7W5]	ENSMMUT00000010187	1021	1160	+
ENSMMUG00000007301	DYNC1I2	Uncharacterized protein [Source:UniProtKB/TrEMBL;Acc:F7F396]	ENSMMUT00000010208	2021	2190	+
ENSMMUG00000031385	RPLP1	ribosomal protein, large, P1 [Source:HGNC Symbol;Acc:HGNC:10372]	ENSMMUT00000045143	1	120	+
ENSMMUG00000000074	RTFDC1	replication termination factor 2 domain containing 1 [Source:HGNC Symbol;Acc:HGNC:15890]	ENSMMUT00000000107	631	810	+
ENSMMUG00000007310	SLC25A12	Calcium-binding mitochondrial carrier protein Aralar1; Uncharacterized protein [Source:UniProtKB/TrEMBL;Acc:F7F2U3]	ENSMMUT00000010218	1911	2197	+
ENSMMUG00000018803	RBBP5	retinoblastoma binding protein 5 [Source:HGNC Symbol;Acc:HGNC:9888]	ENSMMUT00000026438	1311	1560	+
ENSMMUG00000007313	HAT1	histone acetyltransferase 1 [Source:HGNC Symbol;Acc:HGNC:4821]	ENSMMUT00000010219	951	1352	+
ENSMMUG00000000070	AURKA	Uncharacterized protein [Source:UniProtKB/TrEMBL;Acc:F7GNU0]	ENSMMUT00000045131	1571	1760	+
ENSMMUG00000022553	PDK1	pyruvate dehydrogenase kinase, isozyme 1 [Source:HGNC Symbol;Acc:HGNC:8809]	ENSMMUT00000045125	1061	1170	+
ENSMMUG00000018358	ZNF217	Uncharacterized protein [Source:UniProtKB/TrEMBL;Acc:F7GNV2]	ENSMMUT00000025798	2851	3120	+
ENSMMUG00000018846	ZFP64	Uncharacterized protein [Source:UniProtKB/TrEMBL;Acc:F6XST5]	ENSMMUT00000026498	1131	1300	+
ENSMMUG00000014672	ZAK	Mitogen-activated protein kinase kinase kinase MLT isoform 2; Uncharacterized protein [Source:UniProtKB/TrEMBL;Acc:F7FLS9]	ENSMMUT00000045114	2381	2590	+
ENSMMUG00000011236	MDM4	MDM4, p53 regulator [Source:HGNC Symbol;Acc:HGNC:6974]	ENSMMUT00000015723	1151	1340	+
ENSMMUG00000016563		Uncharacterized protein [Source:UniProtKB/TrEMBL;Acc:F7GQ93]	ENSMMUT00000023260	631	840	+
ENSMMUG00000014228	CDCA7	Cell division cycle-associated protein 7 isoform 2; Uncharacterized protein [Source:UniProtKB/TrEMBL;Acc:F7D7H5]	ENSMMUT00000019966	1011	1190	+
ENSMMUG00000031377		Uncharacterized protein [Source:UniProtKB/TrEMBL;Acc:F7GQ97]	ENSMMUT00000045112	239	340	+
ENSMMUG00000016561	PPP1R15B	protein phosphatase 1, regulatory subunit 15B [Source:HGNC Symbol;Acc:HGNC:14951]	ENSMMUT00000023258	2371	2617	+
ENSMMUG00000001851			ENSMMUT00000002605	224	330	+
ENSMMUG00000002759	DPM1	Dolichol-phosphate mannosyltransferase; Uncharacterized protein [Source:UniProtKB/TrEMBL;Acc:F7H496]	ENSMMUT00000003920	12	140	+
ENSMMUG00000021818	SP3	Sp3 transcription factor [Source:HGNC Symbol;Acc:HGNC:11208]	ENSMMUT00000030702	2091	2205	+
ENSMMUG00000007092	OLA1	Obg-like ATPase 1 isoform 1; Uncharacterized protein [Source:UniProtKB/TrEMBL;Acc:F7ERJ8]	ENSMMUT00000045105	601	784	+
ENSMMUG00000002761	ADNP	Activity-dependent neuroprotective protein; Activity-dependent neuroprotector homeobox protein; Uncharacterized protein [Source:UniProtKB/TrEMBL;Acc:F7H2B6]	ENSMMUT00000003924	3631	3940	+
ENSMMUG00000007878	PTPN1	Tyrosine-protein phosphatase non-receptor type [Source:UniProtKB/TrEMBL;Acc:F7B6C1]	ENSMMUT00000011037	11	110	+
ENSMMUG00000010539	ZC3H11A	Uncharacterized protein [Source:UniProtKB/TrEMBL;Acc:F7D104]	ENSMMUT00000014745	5491	5620	+
ENSMMUG00000000757	RNF114	RING finger protein 114; Uncharacterized protein [Source:UniProtKB/TrEMBL;Acc:F6RK58]	ENSMMUT00000001088	2071	2280	+
ENSMMUG00000031370	ZBED6	zinc finger, BED-type containing 6 [Source:HGNC Symbol;Acc:HGNC:33273]	ENSMMUT00000045092	931	1140	+
ENSMMUG00000002715	SLC9A8	solute carrier family 9, subfamily A (NHE8, cation proton antiporter 8), member 8 [Source:HGNC Symbol;Acc:HGNC:20728]	ENSMMUT00000003864	1471	1710	+
ENSMMUG00000002124	B4GALT5	Beta-1,4-galactosyltransferase 5; Uncharacterized protein [Source:UniProtKB/TrEMBL;Acc:F6UWL7]	ENSMMUT00000002993	991	1572	+
ENSMMUG00000009593	WIPF1	Uncharacterized protein; WAS/WASL-interacting protein family member 1 [Source:UniProtKB/TrEMBL;Acc:F7ACR6]	ENSMMUT00000013388	161	300	+
ENSMMUG00000023621	DDX27	Putative ATP-dependent RNA helicase DDX27; Uncharacterized protein [Source:UniProtKB/TrEMBL;Acc:F7HB37]	ENSMMUT00000033228	1831	2350	+
ENSMMUG00000003954	ATP5G3	ATP synthase lipid-binding protein, mitochondrial isoform A; Uncharacterized protein [Source:UniProtKB/TrEMBL;Acc:F6ZG64]	ENSMMUT00000005606	1	197	+
ENSMMUG00000023498	KIAA1715	Protein lunapark; Uncharacterized protein [Source:UniProtKB/TrEMBL;Acc:F7E2N7]	ENSMMUT00000033059	1010	1314	+
ENSMMUG00000002302	STAU1	Uncharacterized protein [Source:UniProtKB/TrEMBL;Acc:F7AER2]	ENSMMUT00000003261	1881	2200	+
ENSMMUG00000019636	CSE1L	Exportin-2; Exportin-2 isoform 1; Uncharacterized protein [Source:UniProtKB/TrEMBL;Acc:F7AUV0]	ENSMMUT00000027581	2571	2700	+
ENSMMUG00000001861	NFE2L2	Uncharacterized protein [Source:UniProtKB/TrEMBL;Acc:F7ACY2]	ENSMMUT00000002623	1571	1760	+
ENSMMUG00000008502	AGPS	alkylglycerone phosphate synthase [Source:HGNC Symbol;Acc:HGNC:327]	ENSMMUT00000011881	891	1080	+
ENSMMUG00000019635	ARFGEF2	ADP-ribosylation factor guanine nucleotide-exchange factor 2 (brefeldin A-inhibited) [Source:HGNC Symbol;Acc:HGNC:15853]	ENSMMUT00000027578	5331	5600	+
ENSMMUG00000000801	TMEM183A	Uncharacterized protein [Source:UniProtKB/TrEMBL;Acc:F6R1V8]	ENSMMUT00000001163	334	530	+
ENSMMUG00000015072	PREX1	phosphatidylinositol-3,4,5-trisphosphate-dependent Rac exchange factor 1 [Source:HGNC Symbol;Acc:HGNC:32594]	ENSMMUT00000021127	4671	4770	+
ENSMMUG00000002185	PRKRA	protein kinase, interferon-inducible double stranded RNA dependent activator [Source:HGNC Symbol;Acc:HGNC:9438]	ENSMMUT00000003086	591	710	+
ENSMMUG00000007046	ADIPOR1	Adiponectin receptor protein 1; Uncharacterized protein [Source:UniProtKB/TrEMBL;Acc:F7F197]	ENSMMUT00000033260	1441	1840	+
ENSMMUG00000017849	KLHL12	Kelch-like protein 12; Uncharacterized protein [Source:UniProtKB/TrEMBL;Acc:F7DK52]	ENSMMUT00000025086	2333	2740	+
ENSMMUG00000012020	NCOA3	nuclear receptor coactivator 3 [Source:HGNC Symbol;Acc:HGNC:7670]	ENSMMUT00000016843	4361	4860	+
ENSMMUG00000015233	KDM5B	lysine (K)-specific demethylase 5B [Source:HGNC Symbol;Acc:HGNC:18039]	ENSMMUT00000021356	4571	4690	+
ENSMMUG00000015710	ZMYND8	Uncharacterized protein [Source:UniProtKB/TrEMBL;Acc:F6SF51]	ENSMMUT00000022057	3931	4058	+
ENSMMUG00000013795	UBE2T	ubiquitin-conjugating enzyme E2T (putative) [Source:HGNC Symbol;Acc:HGNC:25009]	ENSMMUT00000019373	391	590	+
ENSMMUG00000013790		Uncharacterized protein [Source:UniProtKB/TrEMBL;Acc:F6TDH9]	ENSMMUT00000019366	611	810	+
ENSMMUG00000001926	RNPEP	Uncharacterized protein [Source:UniProtKB/TrEMBL;Acc:F6TYZ5]	ENSMMUT00000002725	1461	1660	+
ENSMMUG00000001924	TIMM17A	Mitochondrial import inner membrane translocase subunit Tim17-A; Uncharacterized protein [Source:UniProtKB/TrEMBL;Acc:F6TZ17]	ENSMMUT00000002722	791	902	+
ENSMMUG00000001916	IPO9	importin 9 [Source:HGNC Symbol;Acc:HGNC:19425]	ENSMMUT00000002714	3176	3447	+
ENSMMUG00000020642	CWC22	CWC22 spliceosome-associated protein homolog (S. cerevisiae) [Source:HGNC Symbol;Acc:HGNC:29322]	ENSMMUT00000029039	2261	2870	+
ENSMMUG00000020772	CSRP1	Cysteine and glycine-rich protein 1 isoform 1; Uncharacterized protein [Source:UniProtKB/TrEMBL;Acc:F7HCD8]	ENSMMUT00000029213	11	120	+
ENSMMUG00000008069	UBE2E3	Ubiquitin-conjugating enzyme E2 E3; Uncharacterized protein [Source:UniProtKB/TrEMBL;Acc:F7H158]	ENSMMUT00000011283	531	820	+
ENSMMUG00000000300	ITGA4	integrin, alpha 4 (antigen CD49D, alpha 4 subunit of VLA-4 receptor) [Source:HGNC Symbol;Acc:HGNC:6140]	ENSMMUT00000000438	3191	3320	+
ENSMMUG00000014277	SSFA2	Sperm-specific antigen 2 isoform 2; Uncharacterized protein [Source:UniProtKB/TrEMBL;Acc:F7BY73]	ENSMMUT00000020034	2161	2320	+
ENSMMUG00000014394	DNAJC10	DnaJ homolog subfamily C member 10; Uncharacterized protein [Source:UniProtKB/TrEMBL;Acc:F7BX23]	ENSMMUT00000020198	2571	2940	+
ENSMMUG00000015064	ELMO2	Engulfment and cell motility protein 2; Uncharacterized protein [Source:UniProtKB/TrEMBL;Acc:F6WWC5]	ENSMMUT00000021115	2931	3120	+
ENSMMUG00000018071	SLC35C2	Uncharacterized protein [Source:UniProtKB/TrEMBL;Acc:F7EKU7]	ENSMMUT00000025382	958	1090	+
ENSMMUG00000005921	KIF21B	kinesin family member 21B [Source:HGNC Symbol;Acc:HGNC:29442]	ENSMMUT00000008286	2201	2400	+
ENSMMUG00000003683	CD40	CD40 molecule, TNF receptor superfamily member 5 [Source:HGNC Symbol;Acc:HGNC:11919]	ENSMMUT00000005213	1241	1450	+
ENSMMUG00000016555	NCOA5	Nuclear receptor coactivator 5; Uncharacterized protein [Source:UniProtKB/TrEMBL;Acc:F7FXV9]	ENSMMUT00000045016	621	850	+
ENSMMUG00000013702	ZNF335	zinc finger protein 335 [Source:HGNC Symbol;Acc:HGNC:15807]	ENSMMUT00000019246	4231	4438	+
ENSMMUG00000013697	PCIF1	PDX1 C-terminal inhibiting factor 1 [Source:HGNC Symbol;Acc:HGNC:16200]	ENSMMUT00000019234	1999	2368	+
ENSMMUG00000009960	CTSA	Uncharacterized protein [Source:UniProtKB/TrEMBL;Acc:F6RBN1]	ENSMMUT00000045002	2871	3030	+
ENSMMUG00000000009	PTPRC	Uncharacterized protein [Source:UniProtKB/TrEMBL;Acc:F7HTR2]	ENSMMUT00000000016	3611	3890	+
ENSMMUG00000012510	ACOT8	Uncharacterized protein [Source:UniProtKB/TrEMBL;Acc:F7EDA8]	ENSMMUT00000045001	991	1096	+
ENSMMUG00000021023	UBE2C	Uncharacterized protein [Source:UniProtKB/TrEMBL;Acc:F7HGA9]	ENSMMUT00000029565	41	140	+
ENSMMUG00000021022	DNTTIP1	Deoxynucleotidyltransferase terminal-interacting protein 1; Uncharacterized protein [Source:UniProtKB/TrEMBL;Acc:F7G203]	ENSMMUT00000044992	21	120	+
ENSMMUG00000019335	RPL3	ribosomal protein L3 [Source:HGNC Symbol;Acc:HGNC:10332]	ENSMMUT00000027159	347	466	+
ENSMMUG00000011080	WDR75	WD repeat domain 75 [Source:HGNC Symbol;Acc:HGNC:25725]	ENSMMUT00000015492	2261	2596	+
ENSMMUG00000014310	ASNSD1	asparagine synthetase domain containing 1 [Source:HGNC Symbol;Acc:HGNC:24910]	ENSMMUT00000020080	2111	2330	+
ENSMMUG00000014315	OSGEPL1	O-sialoglycoprotein endopeptidase-like 1 [Source:HGNC Symbol;Acc:HGNC:23075]	ENSMMUT00000020084	311	508	+
ENSMMUG00000014316	ORMDL1	ORM1-like protein 1; Uncharacterized protein [Source:UniProtKB/TrEMBL;Acc:F7D5L1]	ENSMMUT00000020085	451	670	+
ENSMMUG00000003407	SYS1	Protein SYS1 homolog isoform a; Protein SYS1-like protein; Uncharacterized protein [Source:UniProtKB/TrEMBL;Acc:F7FE74]	ENSMMUT00000004819	441	590	+
ENSMMUG00000003406	SDC4	Syndecan [Source:UniProtKB/TrEMBL;Acc:F7FE95]	ENSMMUT00000004816	573	784	+
ENSMMUG00000007283	HIBCH	3-hydroxyisobutyryl-CoA hydrolase [Source:HGNC Symbol;Acc:HGNC:4908]	ENSMMUT00000010173	271	420	+
ENSMMUG00000007289	MFSD6	Major facilitator superfamily domain-containing protein 6; Uncharacterized protein [Source:UniProtKB/TrEMBL;Acc:F7FBJ5]	ENSMMUT00000010182	3651	3770	+
ENSMMUG00000001145	TMEM194B	Uncharacterized protein [Source:UniProtKB/TrEMBL;Acc:F6RQD0]	ENSMMUT00000001615	741	1010	+
ENSMMUG00000013212	STK4	serine/threonine-protein kinase 4 [Source:RefSeq peptide;Acc:NP_001162148]	ENSMMUT00000018534	3	140	+
ENSMMUG00000022664	NAB1	NGFI-A-binding protein 1; Uncharacterized protein [Source:UniProtKB/TrEMBL;Acc:F7AIE9]	ENSMMUT00000031891	1509	1688	+
ENSMMUG00000013211	TOMM34	translocase of outer mitochondrial membrane 34 [Source:HGNC Symbol;Acc:HGNC:15746]	ENSMMUT00000018533	541	690	+
ENSMMUG00000005612	GLS	Uncharacterized protein [Source:UniProtKB/TrEMBL;Acc:F6WK20]	ENSMMUT00000044972	3781	3960	+
ENSMMUG00000005613	STAT1	Signal transducer and activator of transcription 1-alpha/beta isoform alpha; Uncharacterized protein [Source:UniProtKB/TrEMBL;Acc:F6WE02]	ENSMMUT00000007897	2661	2820	+
ENSMMUG00000013206	YWHAB	14-3-3 protein beta/alpha; Uncharacterized protein [Source:UniProtKB/TrEMBL;Acc:F6XFG9]	ENSMMUT00000018526	2521	2660	+
ENSMMUG00000013969	SERINC3	Serine incorporator 3; Tumor differentially expressed protein 1; Uncharacterized protein [Source:UniProtKB/TrEMBL;Acc:F6S622]	ENSMMUT00000019608	1391	1690	+
ENSMMUG00000002840	FITM2	Fat storage-inducing transmembrane protein 2; Fat-inducing protein 2; Uncharacterized protein [Source:UniProtKB/TrEMBL;Acc:F7HI34]	ENSMMUT00000004025	661	820	+
ENSMMUG00000005621	SLC39A10	Uncharacterized protein; Zinc transporter ZIP10 [Source:UniProtKB/TrEMBL;Acc:F6WDC7]	ENSMMUT00000044946	2791	3060	+
ENSMMUG00000003486	RGS1	Uncharacterized protein [Source:UniProtKB/TrEMBL;Acc:F7E7H3]	ENSMMUT00000004937	521	1040	+
ENSMMUG00000005626	STK17B	serine/threonine kinase 17b [Source:HGNC Symbol;Acc:HGNC:11396]	ENSMMUT00000007913	851	1196	+
ENSMMUG00000016857	PTGS2	Uncharacterized protein [Source:UniProtKB/TrEMBL;Acc:F7BWZ9]	ENSMMUT00000023682	1821	1965	+
ENSMMUG00000005627	HECW2	Uncharacterized protein [Source:UniProtKB/TrEMBL;Acc:F6WD73]	ENSMMUT00000007914	581	900	+
ENSMMUG00000008643	GTF3C3	General transcription factor 3C polypeptide 3 isoform 1; Uncharacterized protein [Source:UniProtKB/TrEMBL;Acc:F7F8I5]	ENSMMUT00000012085	3331	3470	+
ENSMMUG00000006742			ENSMMUT00000044930	921	1050	+
ENSMMUG00000009081	TPR	Uncharacterized protein [Source:UniProtKB/TrEMBL;Acc:F7EEA8]	ENSMMUT00000012707	771	930	+
ENSMMUG00000011124			ENSMMUT00000015549	335	448	+
ENSMMUG00000022425	ANKRD44	Uncharacterized protein [Source:UniProtKB/TrEMBL;Acc:F6XBK4]	ENSMMUT00000031547	1421	1600	+
ENSMMUG00000020458	CHD6	chromodomain helicase DNA binding protein 6 [Source:HGNC Symbol;Acc:HGNC:19057]	ENSMMUT00000028784	7791	7930	+
ENSMMUG00000022430	SF3B1	Splicing factor 3B subunit 1 isoform 1; Uncharacterized protein [Source:UniProtKB/TrEMBL;Acc:F6X4D3]	ENSMMUT00000031550	3031	3140	+
ENSMMUG00000013884	IVNS1ABP	Uncharacterized protein [Source:UniProtKB/TrEMBL;Acc:F6R564]	ENSMMUT00000019491	2471	2610	+
ENSMMUG00000005905	PLCG1	1-phosphatidylinositol-4,5-bisphosphate phosphodiesterase gamma-1 isoform a; Uncharacterized protein [Source:UniProtKB/TrEMBL;Acc:F6WWF3]	ENSMMUT00000008266	3911	4180	+
ENSMMUG00000023810	MARS2	methionyl-tRNA synthetase 2, mitochondrial [Source:HGNC Symbol;Acc:HGNC:25133]	ENSMMUT00000033506	1031	1894	+
ENSMMUG00000011112	TOP1	Uncharacterized protein [Source:UniProtKB/TrEMBL;Acc:F6TZC2]	ENSMMUT00000015533	851	990	+
ENSMMUG00000003385	DHX35	DEAH (Asp-Glu-Ala-His) box polypeptide 35 [Source:HGNC Symbol;Acc:HGNC:15861]	ENSMMUT00000004782	2391	2670	+
ENSMMUG00000023167	TYW5	tRNA-yW synthesizing protein 5 [Source:HGNC Symbol;Acc:HGNC:26754]	ENSMMUT00000032587	1091	1190	+
ENSMMUG00000023168	C2orf47	chromosome 2 open reading frame 47 [Source:HGNC Symbol;Acc:HGNC:26198]	ENSMMUT00000032588	1101	1267	+
ENSMMUG00000008101	SPATS2L	SPATS2-like protein isoform a; Uncharacterized protein [Source:UniProtKB/TrEMBL;Acc:F7HIW4]	ENSMMUT00000011324	1391	1570	+
ENSMMUG00000008102	KCTD18	Uncharacterized protein [Source:UniProtKB/TrEMBL;Acc:F7HIV8]	ENSMMUT00000011326	1298	1550	+
ENSMMUG00000003384	FAM83D	family with sequence similarity 83, member D [Source:HGNC Symbol;Acc:HGNC:16122]	ENSMMUT00000004781	1531	1640	+
ENSMMUG00000019515	FAM129A	family with sequence similarity 129, member A [Source:HGNC Symbol;Acc:HGNC:16784]	ENSMMUT00000027414	1831	2360	+
ENSMMUG00000021930	SGOL2	shugoshin-like 2 (S. pombe) [Source:HGNC Symbol;Acc:HGNC:30812]	ENSMMUT00000044908	3121	3290	+
ENSMMUG00000017350	RALGAPB	Uncharacterized protein [Source:UniProtKB/TrEMBL;Acc:F7B4G0]	ENSMMUT00000044899	5171	5320	+
ENSMMUG00000005410	EDEM3	Uncharacterized protein [Source:UniProtKB/TrEMBL;Acc:F7GT33]	ENSMMUT00000007610	3961	4090	+
ENSMMUG00000022202	BZW1	basic leucine zipper and W2 domains 1 [Source:HGNC Symbol;Acc:HGNC:18380]	ENSMMUT00000031227	2611	2710	+
ENSMMUG00000006640	CLK1	Uncharacterized protein [Source:UniProtKB/TrEMBL;Acc:F7B4G9]	ENSMMUT00000044898	42	480	+
ENSMMUG00000016409	TSEN15	Uncharacterized protein [Source:UniProtKB/TrEMBL;Acc:F7FYG5]	ENSMMUT00000023039	1741	1888	+
ENSMMUG00000006639	NIF3L1	NIF3-like protein 1 isoform 1; Uncharacterized protein [Source:UniProtKB/TrEMBL;Acc:F7B590]	ENSMMUT00000044895	1291	1490	+
ENSMMUG00000014460	ORC2	origin recognition complex, subunit 2 [Source:HGNC Symbol;Acc:HGNC:8488]	ENSMMUT00000020284	2091	2270	+
ENSMMUG00000018924	RPRD1B	Cell cycle-related and expression-elevated protein in tumor; Regulation of nuclear pre-mRNA domain-containing protein 1B; Uncharacterized protein [Source:UniProtKB/TrEMBL;Acc:F6ZTV4]	ENSMMUT00000026603	881	1520	+
ENSMMUG00000012224	FAM126B	Putative uncharacterized protein FAM126B; Uncharacterized protein [Source:UniProtKB/TrEMBL;Acc:F6VFY7]	ENSMMUT00000017117	1401	1710	+
ENSMMUG00000012225		NADH dehydrogenase [ubiquinone] 1 beta subcomplex subunit 3; Uncharacterized protein [Source:UniProtKB/TrEMBL;Acc:F6VFX1]	ENSMMUT00000017119	321	450	+
ENSMMUG00000018458	SMG7	Uncharacterized protein [Source:UniProtKB/TrEMBL;Acc:F7C550]	ENSMMUT00000025950	4471	4760	+
ENSMMUG00000017224	CTNNBL1	Uncharacterized protein [Source:UniProtKB/TrEMBL;Acc:F7BBR8]	ENSMMUT00000024215	1721	1880	+
ENSMMUG00000015940	BLCAP	Bladder cancer-associated protein; Uncharacterized protein [Source:UniProtKB/TrEMBL;Acc:F7AJE1]	ENSMMUT00000022417	1619	2015	+
ENSMMUG00000010363	RPN2	ribophorin II [Source:HGNC Symbol;Acc:HGNC:10382]	ENSMMUT00000044862	2019	2380	+
ENSMMUG00000011506	RIC8A	RIC8 guanine nucleotide exchange factor A [Source:HGNC Symbol;Acc:HGNC:29550]	ENSMMUT00000016112	2251	2360	+
ENSMMUG00000023812	TRAK2	Trafficking kinesin-binding protein 2; Uncharacterized protein [Source:UniProtKB/TrEMBL;Acc:F7HR24]	ENSMMUT00000033510	3191	3440	+
ENSMMUG00000004625	ATHL1	Uncharacterized protein [Source:UniProtKB/TrEMBL;Acc:F6PZB6]	ENSMMUT00000006541	1	270	+
ENSMMUG00000013256		Uncharacterized protein [Source:UniProtKB/TrEMBL;Acc:F6ZD94]	ENSMMUT00000018610	521	620	+
ENSMMUG00000013257	IFITM1	interferon induced transmembrane protein 1 [Source:HGNC Symbol;Acc:HGNC:5412]	ENSMMUT00000018611	1	120	+
ENSMMUG00000005635	DHX9	ATP-dependent RNA helicase A; Uncharacterized protein [Source:UniProtKB/TrEMBL;Acc:F6W5Y4]	ENSMMUT00000007925	3811	3930	+
ENSMMUG00000002091	SAMHD1	Uncharacterized protein [Source:UniProtKB/TrEMBL;Acc:F6WNQ8]	ENSMMUT00000044855	1541	1770	+
ENSMMUG00000010783	RNH1	Ribonuclease/angiogenin inhibitor 1; Uncharacterized protein [Source:UniProtKB/TrEMBL;Acc:F7CA88]	ENSMMUT00000044852	2631	2779	+
ENSMMUG00000031292	ALS2	amyotrophic lateral sclerosis 2 (juvenile) [Source:HGNC Symbol;Acc:HGNC:443]	ENSMMUT00000044853	2131	2250	+
ENSMMUG00000005576	DSN1	Uncharacterized protein [Source:UniProtKB/TrEMBL;Acc:F7CAB7]	ENSMMUT00000044848	2031	2155	+
ENSMMUG00000005638	RGS16	Uncharacterized protein [Source:UniProtKB/TrEMBL;Acc:F6W5V5]	ENSMMUT00000007928	601	810	+
ENSMMUG00000008201	NDRG3	NDRG family member 3 [Source:HGNC Symbol;Acc:HGNC:14462]	ENSMMUT00000011464	581	680	+
ENSMMUG00000000582	NOP58	Nucleolar protein 58; Uncharacterized protein [Source:UniProtKB/TrEMBL;Acc:F6ZQ04]	ENSMMUT00000000845	1312	1880	+
ENSMMUG00000021665	RASSF7	Ras association (RalGDS/AF-6) domain family (N-terminal) member 7 [Source:HGNC Symbol;Acc:HGNC:1166]	ENSMMUT00000044844	1551	1740	+
ENSMMUG00000008195	TGIF2	Uncharacterized protein [Source:UniProtKB/TrEMBL;Acc:F7GWV2]	ENSMMUT00000044839	1201	1340	+
ENSMMUG00000021152	FAM117B	Uncharacterized protein [Source:UniProtKB/TrEMBL;Acc:F7H8Y5]	ENSMMUT00000029754	1531	1660	+
ENSMMUG00000020691	AAR2	AAR2 splicing factor homolog (S. cerevisiae) [Source:HGNC Symbol;Acc:HGNC:15886]	ENSMMUT00000029105	911	1060	+
ENSMMUG00000020023	MR1	Uncharacterized protein [Source:UniProtKB/TrEMBL;Acc:F7GIY9]	ENSMMUT00000028140	901	1220	+
ENSMMUG00000002660	DEAF1	DEAF1 transcription factor [Source:HGNC Symbol;Acc:HGNC:14677]	ENSMMUT00000003795	1381	1680	+
ENSMMUG00000020021	STX6	Uncharacterized protein [Source:UniProtKB/TrEMBL;Acc:F7GIZ6]	ENSMMUT00000028139	991	1450	+
ENSMMUG00000020019	KIAA1614	KIAA1614 [Source:HGNC Symbol;Acc:HGNC:29327]	ENSMMUT00000028136	1741	2080	+
ENSMMUG00000012848	XPR1	xenotropic and polytropic retrovirus receptor 1 [Source:HGNC Symbol;Acc:HGNC:12827]	ENSMMUT00000018029	2331	2573	+
ENSMMUG00000009306	SCAND1	SCAN domain-containing protein 1; Uncharacterized protein [Source:UniProtKB/TrEMBL;Acc:F7H1F7]	ENSMMUT00000013004	651	770	+
ENSMMUG00000010633	PHF20	Uncharacterized protein [Source:UniProtKB/TrEMBL;Acc:F7BJ85]	ENSMMUT00000044820	751	970	+
ENSMMUG00000007512	CEND1	BM88 antigen; Cell cycle exit and neuronal differentiation protein 1; Uncharacterized protein [Source:UniProtKB/TrEMBL;Acc:F6QDS4]	ENSMMUT00000010506	251	420	+
ENSMMUG00000016715	LRDD	Uncharacterized protein [Source:UniProtKB/TrEMBL;Acc:F6VDQ1]	ENSMMUT00000023484	2481	2700	+
ENSMMUG00000012047	QSOX1	quiescin Q6 sulfhydryl oxidase 1 [Source:HGNC Symbol;Acc:HGNC:9756]	ENSMMUT00000016874	2644	2910	+
ENSMMUG00000010951	NFS1	Uncharacterized protein [Source:UniProtKB/TrEMBL;Acc:F7BXK5]	ENSMMUT00000044804	1851	2120	+
ENSMMUG00000020625	PNPLA2	patatin-like phospholipase domain containing 2 [Source:HGNC Symbol;Acc:HGNC:30802]	ENSMMUT00000029020	721	1070	+
ENSMMUG00000003618	CHID1	Chitinase domain-containing protein 1 isoform a; Uncharacterized protein [Source:UniProtKB/TrEMBL;Acc:F6QEE2]	ENSMMUT00000005126	1301	1450	+
ENSMMUG00000003620	AP2A2	adaptor-related protein complex 2, alpha 2 subunit [Source:HGNC Symbol;Acc:HGNC:562]	ENSMMUT00000005127	1791	1980	+
ENSMMUG00000020959	SPAG4	sperm associated antigen 4 [Source:HGNC Symbol;Acc:HGNC:11214]	ENSMMUT00000029475	1271	1450	+
ENSMMUG00000014873	TOR1AIP1	torsin A interacting protein 1 [Source:HGNC Symbol;Acc:HGNC:29456]	ENSMMUT00000020861	1542	2010	+
ENSMMUG00000001054	EEF1B2	Elongation factor 1-beta; Uncharacterized protein [Source:UniProtKB/TrEMBL;Acc:F6QN95]	ENSMMUT00000001502	931	1050	+
ENSMMUG00000003104	TOLLIP	Uncharacterized protein [Source:UniProtKB/TrEMBL;Acc:F7DRQ6]	ENSMMUT00000004391	821	1040	+
ENSMMUG00000011211	BRSK2	BR serine/threonine kinase 2 [Source:HGNC Symbol;Acc:HGNC:11405]	ENSMMUT00000015683	2791	2900	+
ENSMMUG00000003768	SOAT1	sterol O-acyltransferase 1 [Source:HGNC Symbol;Acc:HGNC:11177]	ENSMMUT00000005330	2381	2516	+
ENSMMUG00000017450		Uncharacterized protein [Source:UniProtKB/TrEMBL;Acc:F6TYM1]	ENSMMUT00000044778	1051	1195	+
ENSMMUG00000017735	FASTKD2	FAST kinase domains 2 [Source:HGNC Symbol;Acc:HGNC:29160]	ENSMMUT00000024934	41	810	+
ENSMMUG00000013352			ENSMMUT00000018740	1171	1341	+
ENSMMUG00000010403	UQCC	Uncharacterized protein [Source:UniProtKB/TrEMBL;Acc:F7AU87]	ENSMMUT00000014559	771	890	+
ENSMMUG00000022601	CREB1	Cyclic AMP-responsive element-binding protein 1 isoform A; Uncharacterized protein [Source:UniProtKB/TrEMBL;Acc:F6Z7F5]	ENSMMUT00000031802	941	1060	+
ENSMMUG00000006261	TOR3A	Uncharacterized protein [Source:UniProtKB/TrEMBL;Acc:F7FUL9]	ENSMMUT00000008765	1791	1954	+
ENSMMUG00000006260	FAM20B	Glycosaminoglycan xylosylkinase; Uncharacterized protein [Source:UniProtKB/TrEMBL;Acc:F7H529]	ENSMMUT00000008763	1281	1773	+
ENSMMUG00000022602	METTL21A	Methyltransferase-like protein 21A; Uncharacterized protein [Source:UniProtKB/TrEMBL;Acc:F6Z7E5]	ENSMMUT00000031804	381	560	+
ENSMMUG00000010032	EDEM2	ER degradation-enhancing alpha-mannosidase-like 2; ER degradation-enhancing alpha-mannosidase-like 2 isoform 1; Uncharacterized protein [Source:UniProtKB/TrEMBL;Acc:F6Q1A3]	ENSMMUT00000014003	1421	1852	+
ENSMMUG00000017551	RALGPS2	Uncharacterized protein [Source:UniProtKB/TrEMBL;Acc:F6TH23]	ENSMMUT00000024689	1581	2135	+
ENSMMUG00000016589	TNNT3	troponin T type 3 (skeletal, fast) [Source:HGNC Symbol;Acc:HGNC:11950]	ENSMMUT00000023305	941	1100	+
ENSMMUG00000017550		Uncharacterized protein [Source:UniProtKB/TrEMBL;Acc:F6RJV5]	ENSMMUT00000030947	821	950	+
ENSMMUG00000016077	IDH1	Isocitrate dehydrogenase [NADP] [Source:UniProtKB/TrEMBL;Acc:F7GN57]	ENSMMUT00000022610	391	520	+
ENSMMUG00000000229	TRPC4AP	Short transient receptor potential channel 4-associated protein; Uncharacterized protein [Source:UniProtKB/TrEMBL;Acc:F6XAU6]	ENSMMUT00000000342	2071	2220	+
ENSMMUG00000017524	PIKFYVE	phosphoinositide kinase, FYVE finger containing [Source:HGNC Symbol;Acc:HGNC:23785]	ENSMMUT00000024646	6271	6620	+
ENSMMUG00000017940	GSS	glutathione synthetase [Source:HGNC Symbol;Acc:HGNC:4624]	ENSMMUT00000025208	1	130	+
ENSMMUG00000017932	ACSS2	Uncharacterized protein [Source:UniProtKB/TrEMBL;Acc:F7AV12]	ENSMMUT00000025206	2211	2310	+
ENSMMUG00000002043	CD81	CD81 antigen; Uncharacterized protein [Source:UniProtKB/TrEMBL;Acc:F6WY45]	ENSMMUT00000002892	1371	1470	+
ENSMMUG00000001152	NUF2	Kinetochore protein Nuf2; Uncharacterized protein [Source:UniProtKB/TrEMBL;Acc:F6RPT5]	ENSMMUT00000001627	1491	1670	+
ENSMMUG00000031263			ENSMMUT00000025615	21	120	+
ENSMMUG00000010715	NCOA6	Uncharacterized protein [Source:UniProtKB/TrEMBL;Acc:F7G5E2]	ENSMMUT00000014987	5881	6010	+
ENSMMUG00000015948	MGST3	Microsomal glutathione S-transferase 3; Uncharacterized protein [Source:UniProtKB/TrEMBL;Acc:F7B1G5]	ENSMMUT00000044729	31	140	+
ENSMMUG00000007753	NAP1L4	nucleosome assembly protein 1-like 4 [Source:HGNC Symbol;Acc:HGNC:7640]	ENSMMUT00000010857	951	1120	+
ENSMMUG00000017682	PIGU	Uncharacterized protein [Source:UniProtKB/TrEMBL;Acc:F6UA73]	ENSMMUT00000024856	1591	1800	+
ENSMMUG00000000511	CARS	Uncharacterized protein [Source:UniProtKB/TrEMBL;Acc:F6YB56]	ENSMMUT00000044727	2061	2470	+
ENSMMUG00000010520	LANCL1	LanC-like protein 1; Uncharacterized protein [Source:UniProtKB/TrEMBL;Acc:F7B2A9]	ENSMMUT00000014719	1241	1409	+
ENSMMUG00000015946	ALDH9A1	aldehyde dehydrogenase 9 family, member A1 [Source:HGNC Symbol;Acc:HGNC:412]	ENSMMUT00000022424	821	970	+
ENSMMUG00000005585	TMCO1	Transmembrane and coiled-coil domain-containing protein 1; Uncharacterized protein [Source:UniProtKB/TrEMBL;Acc:F7G4J4]	ENSMMUT00000007853	141	407	+
ENSMMUG00000017681	MAP1LC3A	Microtubule-associated proteins 1A/1B light chain 3A isoform a; Uncharacterized protein [Source:UniProtKB/TrEMBL;Acc:F6UA91]	ENSMMUT00000024855	761	945	+
ENSMMUG00000000565	UCK2	Uridine kinase [Source:UniProtKB/TrEMBL;Acc:F6ZWL3]	ENSMMUT00000000821	1001	1290	+
ENSMMUG00000012912	ITCH	itchy E3 ubiquitin protein ligase [Source:HGNC Symbol;Acc:HGNC:13890]	ENSMMUT00000018113	2751	2970	+
ENSMMUG00000017789	POGK	Pogo transposable element with KRAB domain; Uncharacterized protein [Source:UniProtKB/TrEMBL;Acc:F7EU02]	ENSMMUT00000025001	1941	2250	+
ENSMMUG00000016306		Adenosylhomocysteinase [Source:UniProtKB/TrEMBL;Acc:F7GT77]	ENSMMUT00000022902	1464	2050	+
ENSMMUG00000008155	POU2F1	Uncharacterized protein [Source:UniProtKB/TrEMBL;Acc:F7HE71]	ENSMMUT00000011392	2331	2621	+
ENSMMUG00000011976	DHCR7	7-dehydrocholesterol reductase [Source:HGNC Symbol;Acc:HGNC:2860]	ENSMMUT00000016774	1245	1430	+
ENSMMUG00000000382	SPAG16	Uncharacterized protein [Source:UniProtKB/TrEMBL;Acc:F6X657]	ENSMMUT00000000555	431	536	+
ENSMMUG00000008161	CREG1	cellular repressor of E1A-stimulated genes 1 [Source:HGNC Symbol;Acc:HGNC:2351]	ENSMMUT00000011400	1	130	+
ENSMMUG00000023372	RCSD1	RCSD domain containing 1 [Source:HGNC Symbol;Acc:HGNC:28310]	ENSMMUT00000032883	741	900	+
ENSMMUG00000009184	MPZL1	Uncharacterized protein [Source:UniProtKB/TrEMBL;Acc:F7HPB4]	ENSMMUT00000012838	581	720	+
ENSMMUG00000010389	DCAF6	Uncharacterized protein [Source:UniProtKB/TrEMBL;Acc:F7BF92]	ENSMMUT00000014535	2291	2560	+
ENSMMUG00000012318	ATIC	5-aminoimidazole-4-carboxamide ribonucleotide formyltransferase/IMP cyclohydrolase [Source:HGNC Symbol;Acc:HGNC:794]	ENSMMUT00000017264	1841	1940	+
ENSMMUG00000021166	TIPRL	TOR signaling pathway regulator [Source:HGNC Symbol;Acc:HGNC:30231]	ENSMMUT00000029776	648	780	+
ENSMMUG00000010204		40S ribosomal protein S12 [Source:UniProtKB/TrEMBL;Acc:F6SIP5]	ENSMMUT00000014245	307	468	+
ENSMMUG00000013779	XCL1	Uncharacterized protein [Source:UniProtKB/TrEMBL;Acc:F6SZS4]	ENSMMUT00000019345	341	474	+
ENSMMUG00000010128	IGHMBP2	immunoglobulin mu binding protein 2 [Source:HGNC Symbol;Acc:HGNC:5542]	ENSMMUT00000014141	1861	2450	+
ENSMMUG00000001780	CPT1A	Uncharacterized protein [Source:UniProtKB/TrEMBL;Acc:F7G7S7]	ENSMMUT00000020671	1131	1250	+
ENSMMUG00000007117	ASXL1	Additional sex combs-like protein 1; Uncharacterized protein [Source:UniProtKB/TrEMBL;Acc:F7DTX3]	ENSMMUT00000009931	4061	4180	+
ENSMMUG00000012897	KIF3B	Kinesin-like protein KIF3B; Microtubule plus end-directed kinesin motor 3B; Uncharacterized protein [Source:UniProtKB/TrEMBL;Acc:F6S877]	ENSMMUT00000018090	1501	1680	+
ENSMMUG00000000118	PLAGL2	Pleiomorphic adenoma-like protein 2; Uncharacterized protein; Zinc finger protein PLAGL2 [Source:UniProtKB/TrEMBL;Acc:F7H8A5]	ENSMMUT00000000169	2481	2630	+
ENSMMUG00000017416	TM9SF4	Uncharacterized protein [Source:UniProtKB/TrEMBL;Acc:F7CJR7]	ENSMMUT00000044673	3631	3900	+
ENSMMUG00000016213	PPP6R3	protein phosphatase 6, regulatory subunit 3 [Source:HGNC Symbol;Acc:HGNC:1173]	ENSMMUT00000022783	4181	4451	+
ENSMMUG00000013039	SLC19A2	Uncharacterized protein [Source:UniProtKB/TrEMBL;Acc:F7H816]	ENSMMUT00000018296	1481	1880	+
ENSMMUG00000000973	PDRG1	Uncharacterized protein; p53 and DNA damage-regulated protein 1 [Source:UniProtKB/TrEMBL;Acc:F6SXT9]	ENSMMUT00000001389	591	740	+
ENSMMUG00000000966	TPX2	Uncharacterized protein [Source:UniProtKB/TrEMBL;Acc:F6QQI0]	ENSMMUT00000001379	2751	2930	+
ENSMMUG00000023192	CHKA	choline kinase alpha [Source:HGNC Symbol;Acc:HGNC:1937]	ENSMMUT00000032626	1461	1600	+
ENSMMUG00000023190	TCIRG1	Uncharacterized protein [Source:UniProtKB/TrEMBL;Acc:F7EFI0]	ENSMMUT00000032623	891	1050	+
ENSMMUG00000017963	MREG	Melanoregulin; Uncharacterized protein [Source:UniProtKB/TrEMBL;Acc:F7DTT6]	ENSMMUT00000025237	581	737	+
ENSMMUG00000016582	C1ORF112	Uncharacterized protein [Source:UniProtKB/TrEMBL;Acc:F6VQ15]	ENSMMUT00000023285	2661	2886	+
ENSMMUG00000017964	PECR	Uncharacterized protein [Source:UniProtKB/TrEMBL;Acc:F7DTT0]	ENSMMUT00000025238	841	990	+
ENSMMUG00000005119	HM13	Minor histocompatibility antigen H13 isoform 3; Uncharacterized protein [Source:UniProtKB/TrEMBL;Acc:F7BXY7]	ENSMMUT00000007221	1331	1730	+
ENSMMUG00000001927		Uncharacterized protein [Source:UniProtKB/TrEMBL;Acc:F6TSQ5]	ENSMMUT00000002733	161	260	+
ENSMMUG00000023184	UNC93B1	Uncharacterized protein [Source:UniProtKB/TrEMBL;Acc:F7EJ77]	ENSMMUT00000032611	1651	2100	+
ENSMMUG00000019539	SMARCAL1	Uncharacterized protein [Source:UniProtKB/TrEMBL;Acc:F7CK94]	ENSMMUT00000027448	2991	3120	+
ENSMMUG00000016583	SCYL3	SCY1-like 3 (S. cerevisiae) [Source:HGNC Symbol;Acc:HGNC:19285]	ENSMMUT00000023289	1652	2730	+
ENSMMUG00000018528	NUDT8	nudix (nucleoside diphosphate linked moiety X)-type motif 8 [Source:HGNC Symbol;Acc:HGNC:8055]	ENSMMUT00000026051	398	510	+
ENSMMUG00000005262	ZCCHC3	Uncharacterized protein [Source:UniProtKB/TrEMBL;Acc:F7BPQ3]	ENSMMUT00000007406	315	960	+
ENSMMUG00000011827	CDK2AP2	Cyclin-dependent kinase 2-associated protein 2; Uncharacterized protein [Source:UniProtKB/TrEMBL;Acc:F7H786]	ENSMMUT00000016564	741	920	+
ENSMMUG00000012600	TRIB3	tribbles pseudokinase 3 [Source:HGNC Symbol;Acc:HGNC:16228]	ENSMMUT00000017657	946	1070	+
ENSMMUG00000011821	PITPNM1	phosphatidylinositol transfer protein, membrane-associated 1 [Source:HGNC Symbol;Acc:HGNC:9003]	ENSMMUT00000016563	3551	3780	+
ENSMMUG00000012601	RBCK1	Uncharacterized protein [Source:UniProtKB/TrEMBL;Acc:F7CKH7]	ENSMMUT00000044638	381	730	+
ENSMMUG00000004461	TBC1D20	TBC1 domain family, member 20 [Source:HGNC Symbol;Acc:HGNC:16133]	ENSMMUT00000006318	821	1110	+
ENSMMUG00000031224	CSNK2A1	Casein kinase II subunit alpha isoform a; Uncharacterized protein [Source:UniProtKB/TrEMBL;Acc:F7CKR9]	ENSMMUT00000044635	2381	2540	+
ENSMMUG00000022808	ARPC2	Uncharacterized protein [Source:UniProtKB/TrEMBL;Acc:F6UWA0]	ENSMMUT00000032100	431	580	+
ENSMMUG00000005483	RPS6KB2	ribosomal protein S6 kinase, 70kDa, polypeptide 2 [Source:HGNC Symbol;Acc:HGNC:10437]	ENSMMUT00000007715	1391	1500	+
ENSMMUG00000013639	BAT2L2	Uncharacterized protein [Source:UniProtKB/TrEMBL;Acc:F7GIJ3]	ENSMMUT00000019149	6331	6530	+
ENSMMUG00000022812	AAMP	Macaca mulatta angio-associated, migratory cell protein (AAMP), mRNA. [Source:RefSeq mRNA;Acc:NM_001171059]	ENSMMUT00000044621	31	340	+
ENSMMUG00000004709	PSMF1	proteasome (prosome, macropain) inhibitor subunit 1 (PI31) [Source:HGNC Symbol;Acc:HGNC:9571]	ENSMMUT00000006655	2701	2810	+
ENSMMUG00000015994	NSFL1C	NSFL1 (p97) cofactor (p47) [Source:HGNC Symbol;Acc:HGNC:15912]	ENSMMUT00000022487	1091	1249	+
ENSMMUG00000017280	TBC1D10C	Uncharacterized protein [Source:UniProtKB/TrEMBL;Acc:F7CR35]	ENSMMUT00000024290	1221	1670	+
ENSMMUG00000022817	TMBIM1	Transmembrane BAX inhibitor motif-containing protein 1; Uncharacterized protein [Source:UniProtKB/TrEMBL;Acc:F6UPC8]	ENSMMUT00000032112	1861	2000	+
ENSMMUG00000004523	POLD4	DNA polymerase delta subunit 4; DNA polymerase delta subunit p12; Uncharacterized protein [Source:UniProtKB/TrEMBL;Acc:F6SCR4]	ENSMMUT00000006404	744	910	+
ENSMMUG00000004305	STK35	serine/threonine kinase 35 [Source:HGNC Symbol;Acc:HGNC:16254]	ENSMMUT00000006116	901	1130	+
ENSMMUG00000010050	SNRPB	Small nuclear ribonucleoprotein-associated protein [Source:UniProtKB/TrEMBL;Acc:F6TEX8]	ENSMMUT00000014035	991	1111	+
ENSMMUG00000007279	PIGC	Phosphatidylinositol N-acetylglucosaminyltransferase subunit C; Uncharacterized protein [Source:UniProtKB/TrEMBL;Acc:F7FCE6]	ENSMMUT00000010165	1181	1350	+
ENSMMUG00000007280	SUCO	SUN domain containing ossification factor [Source:HGNC Symbol;Acc:HGNC:1240]	ENSMMUT00000019300	5661	5767	+
ENSMMUG00000015268	CTDSP1	Carboxy-terminal domain RNA polymerase II polypeptide A small phosphatase 1 isoform 1; Uncharacterized protein [Source:UniProtKB/TrEMBL;Acc:F7DV44]	ENSMMUT00000021406	2501	2630	+
ENSMMUG00000008771	KDM2A	Lysine-specific demethylase 2A; Lysine-specific demethylase 2A isoform a; Uncharacterized protein [Source:UniProtKB/TrEMBL;Acc:F7DKL6]	ENSMMUT00000012253	3721	3960	+
ENSMMUG00000013888	NOP56	Uncharacterized protein [Source:UniProtKB/TrEMBL;Acc:F6R553]	ENSMMUT00000019496	1381	1650	+
ENSMMUG00000021328	IDH3B	Uncharacterized protein [Source:UniProtKB/TrEMBL;Acc:F6URC2]	ENSMMUT00000030015	47	180	+
ENSMMUG00000004533	PC	Pyruvate carboxylase [Source:UniProtKB/TrEMBL;Acc:F6SC45]	ENSMMUT00000006414	3741	3860	+
ENSMMUG00000005510	TNFSF4	Uncharacterized protein [Source:UniProtKB/TrEMBL;Acc:F7FL80]	ENSMMUT00000007751	891	1000	+
ENSMMUG00000006737	ZNF142	Uncharacterized protein [Source:UniProtKB/TrEMBL;Acc:F7HF94]	ENSMMUT00000009431	4951	5160	+
ENSMMUG00000006740	BCS1L	BC1 (ubiquinol-cytochrome c reductase) synthesis-like [Source:HGNC Symbol;Acc:HGNC:1020]	ENSMMUT00000044598	612	864	+
ENSMMUG00000004531	RCE1	CAAX prenyl protease 2 isoform 1; Uncharacterized protein [Source:UniProtKB/TrEMBL;Acc:F6SC53]	ENSMMUT00000006413	921	1406	+
ENSMMUG00000006743	RNF25	ring finger protein 25 [Source:HGNC Symbol;Acc:HGNC:14662]	ENSMMUT00000009438	791	1080	+
ENSMMUG00000022798	DARS2	aspartyl-tRNA synthetase 2, mitochondrial [Source:HGNC Symbol;Acc:HGNC:25538]	ENSMMUT00000032079	1773	1930	+
ENSMMUG00000020363	RBM4	Uncharacterized protein [Source:UniProtKB/TrEMBL;Acc:F6W8J1]	ENSMMUT00000044584	1231	1390	+
ENSMMUG00000000630	RC3H1	Uncharacterized protein [Source:UniProtKB/TrEMBL;Acc:F6Y0L7]	ENSMMUT00000000906	2971	3310	+
ENSMMUG00000005200	FAM113A	Uncharacterized protein [Source:UniProtKB/TrEMBL;Acc:F7CSK4]	ENSMMUT00000007324	1721	2000	+
ENSMMUG00000001565	RABGAP1L	RAB GTPase activating protein 1-like [Source:HGNC Symbol;Acc:HGNC:24663]	ENSMMUT00000044582	1441	1580	+
ENSMMUG00000007830	RBM14	RNA binding motif protein 14 [Source:HGNC Symbol;Acc:HGNC:14219]	ENSMMUT00000010964	441	720	+
ENSMMUG00000005513	CCS	Copper chaperone for superoxide dismutase; Superoxide dismutase copper chaperone; Uncharacterized protein [Source:UniProtKB/TrEMBL;Acc:F7FL64]	ENSMMUT00000007754	901	1050	+
ENSMMUG00000005204	VPS16	Uncharacterized protein [Source:UniProtKB/TrEMBL;Acc:F6QQW0]	ENSMMUT00000044573	2561	2679	+
ENSMMUG00000001571	CACYBP	Calcyclin-binding protein isoform 1; Uncharacterized protein [Source:UniProtKB/TrEMBL;Acc:F7FP94]	ENSMMUT00000002223	529	908	+
ENSMMUG00000001573	MRPS14	Uncharacterized protein [Source:UniProtKB/TrEMBL;Acc:F7GV86]	ENSMMUT00000002226	441	540	+
ENSMMUG00000005878	PTPRA	protein tyrosine phosphatase, receptor type, A [Source:HGNC Symbol;Acc:HGNC:9664]	ENSMMUT00000008238	1881	2030	+
ENSMMUG00000000546			ENSMMUT00000000794	1	250	+
ENSMMUG00000000791	CNPPD1	Protein CNPPD1; Uncharacterized protein [Source:UniProtKB/TrEMBL;Acc:F6RA57]	ENSMMUT00000001143	1001	1230	+
ENSMMUG00000000792	FAM134A	family with sequence similarity 134, member A [Source:HGNC Symbol;Acc:HGNC:28450]	ENSMMUT00000001148	1351	1630	+
ENSMMUG00000002072	RFWD2	E3 ubiquitin-protein ligase RFWD2 isoform a; Uncharacterized protein [Source:UniProtKB/TrEMBL;Acc:F6QR11]	ENSMMUT00000044569	2581	2734	+
ENSMMUG00000019616	ABCB6	ATP-binding cassette, sub-family B (MDR/TAP), member 6 [Source:HGNC Symbol;Acc:HGNC:47]	ENSMMUT00000027546	2771	2970	+
ENSMMUG00000019619	ATG9A	Uncharacterized protein [Source:UniProtKB/TrEMBL;Acc:F6QR66]	ENSMMUT00000027554	2791	3060	+
ENSMMUG00000010027	DDRGK1	DDRGK domain containing 1 [Source:HGNC Symbol;Acc:HGNC:16110]	ENSMMUT00000013994	191	330	+
ENSMMUG00000001403	YIF1A	Protein YIF1A; Uncharacterized protein [Source:UniProtKB/TrEMBL;Acc:F7CUN8]	ENSMMUT00000001989	981	1080	+
ENSMMUG00000031203	ITPA	Inosine triphosphate pyrophosphatase [Source:UniProtKB/TrEMBL;Acc:F6QR76]	ENSMMUT00000044561	855	1065	+
ENSMMUG00000014510	ANKZF1	ankyrin repeat and zinc finger domain containing 1 [Source:HGNC Symbol;Acc:HGNC:25527]	ENSMMUT00000020352	1941	2151	+
ENSMMUG00000031202	RAB1B	Ras-related protein Rab-1B; Uncharacterized protein [Source:UniProtKB/TrEMBL;Acc:F6QR86]	ENSMMUT00000044560	881	990	+
ENSMMUG00000019624	GLB1L	Uncharacterized protein [Source:UniProtKB/TrEMBL;Acc:F7B176]	ENSMMUT00000027561	1681	1960	+
ENSMMUG00000019626	STK16	Uncharacterized protein [Source:UniProtKB/TrEMBL;Acc:F7B0W4]	ENSMMUT00000027568	1131	1310	+
ENSMMUG00000022518	PACS1	phosphofurin acidic cluster sorting protein 1 [Source:HGNC Symbol;Acc:HGNC:30032]	ENSMMUT00000031680	4231	4340	+
ENSMMUG00000022283	ATRN	attractin [Source:HGNC Symbol;Acc:HGNC:885]	ENSMMUT00000031348	4071	4576	+
ENSMMUG00000019628	TUBA4A	Tubulin alpha-4A chain; Uncharacterized protein [Source:UniProtKB/TrEMBL;Acc:F6QRE8]	ENSMMUT00000044554	1201	1423	+
ENSMMUG00000011743	SF3B2	splicing factor 3b, subunit 2, 145kDa [Source:HGNC Symbol;Acc:HGNC:10769]	ENSMMUT00000016447	861	1010	+
ENSMMUG00000012003	DNAJB2	Uncharacterized protein [Source:UniProtKB/TrEMBL;Acc:F7H055]	ENSMMUT00000016817	991	1165	+
ENSMMUG00000000634	ZNF692	Uncharacterized protein [Source:UniProtKB/TrEMBL;Acc:F6QRI7]	ENSMMUT00000000912	1722	1913	+
ENSMMUG00000019115	EIF1AD	Eukaryotic translation initiation factor 1A domain-containing protein; Putative RNA-binding protein EIF1AD; Uncharacterized protein [Source:UniProtKB/TrEMBL;Acc:F6T7W0]	ENSMMUT00000026863	621	830	+
ENSMMUG00000008065	SART1	squamous cell carcinoma antigen recognized by T cells [Source:HGNC Symbol;Acc:HGNC:10538]	ENSMMUT00000011279	1131	1250	+
ENSMMUG00000000632	SH3BP5L	SH3 domain-binding protein 5-like; Uncharacterized protein [Source:UniProtKB/TrEMBL;Acc:F6Y0K6]	ENSMMUT00000000907	2021	2280	+
ENSMMUG00000019012	EFEMP2	Uncharacterized protein [Source:UniProtKB/TrEMBL;Acc:F6QSF0]	ENSMMUT00000044538	1791	2144	+
ENSMMUG00000022079	C20orf27	chromosome 20 open reading frame 27 [Source:HGNC Symbol;Acc:HGNC:15873]	ENSMMUT00000031062	1771	1880	+
ENSMMUG00000018922	CDC25B	cell division cycle 25B [Source:HGNC Symbol;Acc:HGNC:1726]	ENSMMUT00000026604	2591	2830	+
ENSMMUG00000019585	ZNF496	zinc finger protein 496 [Source:HGNC Symbol;Acc:HGNC:23713]	ENSMMUT00000027506	1871	2210	+
ENSMMUG00000019014	MUS81	MUS81 structure-specific endonuclease subunit [Source:HGNC Symbol;Acc:HGNC:29814]	ENSMMUT00000026719	2211	2310	+
ENSMMUG00000016408	AHCTF1	AT hook containing transcription factor 1 [Source:HGNC Symbol;Acc:HGNC:24618]	ENSMMUT00000023043	5961	6930	+
ENSMMUG00000004703	RNF24	ring finger protein 24 [Source:HGNC Symbol;Acc:HGNC:13779]	ENSMMUT00000006643	381	680	+
ENSMMUG00000019016	CFL1	Uncharacterized protein [Source:UniProtKB/TrEMBL;Acc:F6RBB3]	ENSMMUT00000026720	921	1020	+
ENSMMUG00000017938	GMPPA	Mannose-1-phosphate guanyltransferase alpha; Uncharacterized protein [Source:UniProtKB/TrEMBL;Acc:F6QZY6]	ENSMMUT00000044527	1681	1830	+
ENSMMUG00000019949	PRNP	Macaca mulatta prion protein (PRNP), mRNA. [Source:RefSeq mRNA;Acc:NM_001047152]	ENSMMUT00000028037	131	744	+
ENSMMUG00000012583			ENSMMUT00000017637	211	370	+
ENSMMUG00000019839	KAT5	Uncharacterized protein [Source:UniProtKB/TrEMBL;Acc:F6QZE4]	ENSMMUT00000027881	61	420	+
ENSMMUG00000007418	RELA	Uncharacterized protein [Source:UniProtKB/TrEMBL;Acc:F6QZH6]	ENSMMUT00000044528	1489	1612	+
ENSMMUG00000020005	SLC23A1	Sodium-dependent vitamin C transporter 2; Solute carrier family 23 member 2; Uncharacterized protein [Source:UniProtKB/TrEMBL;Acc:F6R000]	ENSMMUT00000044526	2101	2320	+
ENSMMUG00000007416	SIPA1	Uncharacterized protein [Source:UniProtKB/TrEMBL;Acc:F6SXF3]	ENSMMUT00000010366	3001	3130	+
ENSMMUG00000007408		Uncharacterized protein [Source:UniProtKB/TrEMBL;Acc:F6SXG8]	ENSMMUT00000010364	2611	2730	+
ENSMMUG00000007406	PCNXL3	Uncharacterized protein [Source:UniProtKB/TrEMBL;Acc:F6T3E7]	ENSMMUT00000010354	931	1200	+
ENSMMUG00000013258	TMEM230	UPF0414 transmembrane protein C20orf30 isoform 1; Uncharacterized protein [Source:UniProtKB/TrEMBL;Acc:F6R010]	ENSMMUT00000018612	521	900	+
ENSMMUG00000007404	MAP3K11	Mitogen-activated protein kinase kinase kinase 11; Uncharacterized protein [Source:UniProtKB/TrEMBL;Acc:F6T3F7]	ENSMMUT00000010353	2851	3080	+
ENSMMUG00000013259	PCNA	Proliferating cell nuclear antigen [Source:UniProtKB/TrEMBL;Acc:F6ZD63]	ENSMMUT00000018615	1	190	+
ENSMMUG00000013242	CHPF	Chondroitin sulfate synthase 2 isoform 1; Uncharacterized protein [Source:UniProtKB/TrEMBL;Acc:F6ZK43]	ENSMMUT00000018592	2231	2450	+
ENSMMUG00000022208	SCCPDH	saccharopine dehydrogenase (putative) [Source:HGNC Symbol;Acc:HGNC:24275]	ENSMMUT00000031237	951	1100	+
ENSMMUG00000013261	CDS2	CDP-diacylglycerol synthase (phosphatidate cytidylyltransferase) 2 [Source:HGNC Symbol;Acc:HGNC:1801]	ENSMMUT00000018617	1208	1424	+
ENSMMUG00000011380	CNST	consortin, connexin sorting protein [Source:HGNC Symbol;Acc:HGNC:26486]	ENSMMUT00000044519	1371	1640	+
ENSMMUG00000014169	EHBP1L1	Uncharacterized protein [Source:UniProtKB/TrEMBL;Acc:F7ALS2]	ENSMMUT00000019884	3461	3740	+
ENSMMUG00000022915	TFB2M	Uncharacterized protein [Source:UniProtKB/TrEMBL;Acc:F6W6K7]	ENSMMUT00000032256	1201	1440	+
ENSMMUG00000001809	GPCPD1	glycerophosphocholine phosphodiesterase GDE1 homolog (S. cerevisiae) [Source:HGNC Symbol;Acc:HGNC:26957]	ENSMMUT00000002545	1561	1830	+
ENSMMUG00000031183	FAM89B	Uncharacterized protein [Source:UniProtKB/TrEMBL;Acc:F6R0S9]	ENSMMUT00000044516	1281	1390	+
ENSMMUG00000002519	STK11IP	Uncharacterized protein [Source:UniProtKB/TrEMBL;Acc:F7HCE7]	ENSMMUT00000003584	3241	3576	+
ENSMMUG00000022345	C10H20ORF196	Uncharacterized protein [Source:UniProtKB/TrEMBL;Acc:F6ZCJ1]	ENSMMUT00000031435	451	610	+
ENSMMUG00000013728	TRMT6	Uncharacterized protein [Source:UniProtKB/TrEMBL;Acc:F6RNX4]	ENSMMUT00000019293	841	1150	+
ENSMMUG00000023477	SCYL1	SCY1-like 1 (S. cerevisiae) [Source:HGNC Symbol;Acc:HGNC:14372]	ENSMMUT00000033028	2215	2420	+
ENSMMUG00000013740	MCM8	Uncharacterized protein [Source:UniProtKB/TrEMBL;Acc:F6R1F4]	ENSMMUT00000044502	1411	1550	+
ENSMMUG00000023297	SLC25A45	Uncharacterized protein [Source:UniProtKB/TrEMBL;Acc:F6R1G1]	ENSMMUT00000032777	677	898	+
ENSMMUG00000031175	COX20	Putative uncharacterized protein FAM36A; Uncharacterized protein [Source:UniProtKB/TrEMBL;Acc:F6R113]	ENSMMUT00000044503	271	464	+
ENSMMUG00000022310	PPPDE1	Uncharacterized protein [Source:UniProtKB/TrEMBL;Acc:F6XDP6]	ENSMMUT00000031390	611	870	+
ENSMMUG00000012317	DPF2	D4, zinc and double PHD fingers family 2 [Source:HGNC Symbol;Acc:HGNC:9964]	ENSMMUT00000017256	451	550	+
ENSMMUG00000022031	POLA2	DNA polymerase alpha subunit B [Source:UniProtKB/TrEMBL;Acc:F7HTD4]	ENSMMUT00000030995	2101	2415	+
ENSMMUG00000000016	ADSS	Adenylosuccinate synthetase isozyme 2 [Source:UniProtKB/TrEMBL;Acc:F7HTL0]	ENSMMUT00000000024	1401	1635	+
ENSMMUG00000005393	ACSL3	acyl-CoA synthetase long-chain family member 3 [Source:HGNC Symbol;Acc:HGNC:3570]	ENSMMUT00000007589	2291	2410	+
ENSMMUG00000013475	CAPN1	Uncharacterized protein [Source:UniProtKB/TrEMBL;Acc:F6ZLR4]	ENSMMUT00000018915	2691	2923	+
ENSMMUG00000021137	TMX4	Thioredoxin-related transmembrane protein 4; Uncharacterized protein [Source:UniProtKB/TrEMBL;Acc:F7HDA1]	ENSMMUT00000029730	1411	1580	+
ENSMMUG00000006159	WDFY1	WD repeat and FYVE domain containing 1 [Source:HGNC Symbol;Acc:HGNC:20451]	ENSMMUT00000044489	1	170	+
ENSMMUG00000018778	MRPL49	39S ribosomal protein L49, mitochondrial; Uncharacterized protein [Source:UniProtKB/TrEMBL;Acc:F6ZWE1]	ENSMMUT00000026397	491	748	+
[truncated: 3,445 more rows]
