# Supplementary material for: Evolution of transcript modification by N6-methyladenosine in primates
Source: HighWire-hosted journal article supplement (doi:10.1101/gr.212563.116), 2017-01-04
Supplement: Supplemental_Table_S8.xlsx [file Supplemental_Table_S8.xlsx]

## Sheet: sTable8.R3Peaks
GID	Symbol	Description	RefSeq_NM	Start	End	Strand
ENSMMUG00000011961	FAM210A	Putative uncharacterized protein C18orf19; Uncharacterized protein [Source:UniProtKB/TrEMBL;Acc:F7HI95]	ENSMMUT00000016748	31	190	+
ENSMMUG00000002512	CEP192	centrosomal protein 192kDa [Source:HGNC Symbol;Acc:HGNC:25515]	ENSMMUT00000048301	1771	2000	+
ENSMMUG00000021992		Uncharacterized protein [Source:UniProtKB/TrEMBL;Acc:F6RJX6]	ENSMMUT00000030945	791	997	+
ENSMMUG00000021855		Uncharacterized protein [Source:UniProtKB/TrEMBL;Acc:F7EHZ2]	ENSMMUT00000030750	401	620	+
ENSMMUG00000021125	AFG3L2	AFG3-like AAA ATPase 2 [Source:HGNC Symbol;Acc:HGNC:315]	ENSMMUT00000029712	2651	2960	+
ENSMMUG00000011467	MPPE1	metallophosphoesterase 1 [Source:HGNC Symbol;Acc:HGNC:15988]	ENSMMUT00000016057	1471	1770	+
ENSMMUG00000010471	IMPA2	Uncharacterized protein [Source:UniProtKB/TrEMBL;Acc:F7BN86]	ENSMMUT00000048294	1021	1130	+
ENSMMUG00000015014	VAPA	Uncharacterized protein [Source:UniProtKB/TrEMBL;Acc:F6V5Z9]	ENSMMUT00000021047	450	720	+
ENSMMUG00000019525	PPP4R1	protein phosphatase 4, regulatory subunit 1 [Source:HGNC Symbol;Acc:HGNC:9320]	ENSMMUT00000027427	2971	3430	+
ENSMMUG00000010726	TWSG1	Twisted gastrulation protein homolog 1; Twisted gastrulation protein-like protein 1; Uncharacterized protein [Source:UniProtKB/TrEMBL;Acc:F7G4Z4]	ENSMMUT00000015000	1621	1833	+
ENSMMUG00000022097	ANKRD12	Uncharacterized protein [Source:UniProtKB/TrEMBL;Acc:F7D913]	ENSMMUT00000048290	3261	3430	+
ENSMMUG00000005086	TGIF1	Uncharacterized protein [Source:UniProtKB/TrEMBL;Acc:F7AEU1]	ENSMMUT00000048280	1611	1804	+
ENSMMUG00000019893	MYL12A	Uncharacterized protein [Source:UniProtKB/TrEMBL;Acc:F7AEV1]	ENSMMUT00000027950	781	930	+
ENSMMUG00000017548	LPIN2	Phosphatidate phosphatase LPIN2; Uncharacterized protein [Source:UniProtKB/TrEMBL;Acc:F6TH75]	ENSMMUT00000024681	641	760	+
ENSMMUG00000005461		Uncharacterized protein [Source:UniProtKB/TrEMBL;Acc:F7AEY8]	ENSMMUT00000007689	3691	4071	+
ENSMMUG00000004046	TYMS	Thymidylate synthase [Source:UniProtKB/TrEMBL;Acc:F6ZR67]	ENSMMUT00000005744	71	210	+
ENSMMUG00000004660	USP14	Ubiquitin carboxyl-terminal hydrolase [Source:UniProtKB/TrEMBL;Acc:F6T5R9]	ENSMMUT00000048273	26	203	+
ENSMMUG00000004656	ROCK1	Rho-associated, coiled-coil containing protein kinase 1 [Source:HGNC Symbol;Acc:HGNC:10251]	ENSMMUT00000006584	2671	2850	+
ENSMMUG00000003992	SNRPD1	Small nuclear ribonucleoprotein Sm D1; Uncharacterized protein [Source:UniProtKB/TrEMBL;Acc:F6XY31]	ENSMMUT00000005657	351	570	+
ENSMMUG00000004382	ABHD3	abhydrolase domain containing 3 [Source:HGNC Symbol;Acc:HGNC:18718]	ENSMMUT00000006223	1291	1510	+
ENSMMUG00000010227	MIB1	Uncharacterized protein [Source:UniProtKB/TrEMBL;Acc:F6S3M0]	ENSMMUT00000014297	411	580	+
ENSMMUG00000021484	NPC1	Niemann-Pick disease, type C1 [Source:HGNC Symbol;Acc:HGNC:7897]	ENSMMUT00000030245	3761	4240	+
ENSMMUG00000004343	TTC39C	Uncharacterized protein [Source:UniProtKB/TrEMBL;Acc:F6XMC4]	ENSMMUT00000006168	1881	2060	+
ENSMMUG00000032555	PPIA	Peptidyl-prolyl cis-trans isomerase [Source:UniProtKB/TrEMBL;Acc:F7CF53]	ENSMMUT00000048255	352	490	+
ENSMMUG00000018006	TRAPPC8	trafficking protein particle complex 8 [Source:HGNC Symbol;Acc:HGNC:29169]	ENSMMUT00000025301	3031	3220	+
ENSMMUG00000009320		Uncharacterized protein [Source:UniProtKB/TrEMBL;Acc:F7CFC6]	ENSMMUT00000013026	1	290	+
ENSMMUG00000000457	GALNT1	Polypeptide N-acetylgalactosaminyltransferase 1; Uncharacterized protein [Source:UniProtKB/TrEMBL;Acc:F6YR98]	ENSMMUT00000000670	1511	1690	+
ENSMMUG00000018777	RPRD1A	Uncharacterized protein [Source:UniProtKB/TrEMBL;Acc:F6ZTW1]	ENSMMUT00000026403	851	950	+
ENSMMUG00000007514	ZBED1	DREF-like protein; Uncharacterized protein; Zinc finger BED domain-containing protein 1 [Source:UniProtKB/TrEMBL;Acc:F6QDB5]	ENSMMUT00000010509	2431	2634	+
ENSMMUG00000018784	SLC39A6	solute carrier family 39 (zinc transporter), member 6 [Source:HGNC Symbol;Acc:HGNC:18607]	ENSMMUT00000026411	291	732	+
ENSMMUG00000018785	ELP2	elongator acetyltransferase complex subunit 2 [Source:HGNC Symbol;Acc:HGNC:18248]	ENSMMUT00000026419	2291	2541	+
ENSMMUG00000008247	MXRA5	Uncharacterized protein [Source:UniProtKB/TrEMBL;Acc:F7HDX3]	ENSMMUT00000011528	5501	5630	+
ENSMMUG00000008306	PRKX	Uncharacterized protein [Source:UniProtKB/TrEMBL;Acc:F7CFE0]	ENSMMUT00000011618	811	910	+
ENSMMUG00000006863	C18ORF10	Uncharacterized protein [Source:UniProtKB/TrEMBL;Acc:F7CFM5]	ENSMMUT00000009597	1081	1330	+
ENSMMUG00000032541		Peptidyl-prolyl cis-trans isomerase [Source:UniProtKB/TrEMBL;Acc:F7CFS5]	ENSMMUT00000048219	381	490	+
ENSMMUG00000006191	TBL1Y	F-box-like/WD repeat-containing protein TBL1Y [Source:RefSeq peptide;Acc:NP_001138540]	ENSMMUT00000008662	491	660	+
ENSMMUG00000008503			ENSMMUT00000011883	701	1225	+
ENSMMUG00000016290	WWC3	WWC family member 3 [Source:HGNC Symbol;Acc:HGNC:29237]	ENSMMUT00000048208	2404	2534	+
ENSMMUG00000003570	ATP5A1	ATP synthase subunit alpha [Source:UniProtKB/TrEMBL;Acc:F7ETD0]	ENSMMUT00000005045	1761	1860	+
ENSMMUG00000013993	HCCS	holocytochrome c synthase [Source:HGNC Symbol;Acc:HGNC:4837]	ENSMMUT00000019640	17	160	+
ENSMMUG00000011473	C18H18ORF25	Uncharacterized protein; Uncharacterized protein C18orf25 isoform b [Source:UniProtKB/TrEMBL;Acc:F7AEY1]	ENSMMUT00000016064	551	740	+
ENSMMUG00000002689	MSL3	male-specific lethal 3 homolog (Drosophila) [Source:HGNC Symbol;Acc:HGNC:7370]	ENSMMUT00000003831	191	470	+
ENSMMUG00000004498	PIAS2	Uncharacterized protein [Source:UniProtKB/TrEMBL;Acc:F6SJC1]	ENSMMUT00000006377	1701	1840	+
ENSMMUG00000010999	HDHD2	haloacid dehalogenase-like hydrolase domain containing 2 [Source:HGNC Symbol;Acc:HGNC:25364]	ENSMMUT00000015379	1011	1230	+
ENSMMUG00000007816	SMAD2	Mothers against decapentaplegic homolog 2 isoform 2; Uncharacterized protein [Source:UniProtKB/TrEMBL;Acc:F7CIW0]	ENSMMUT00000010947	1311	1660	+
ENSMMUG00000019410	OFD1	oral-facial-digital syndrome 1 [Source:HGNC Symbol;Acc:HGNC:2567]	ENSMMUT00000048188	3521	3630	+
ENSMMUG00000001760	DYM	dymeclin [Source:HGNC Symbol;Acc:HGNC:21317]	ENSMMUT00000002484	2124	2250	+
ENSMMUG00000018837			ENSMMUT00000026483	408	525	+
ENSMMUG00000013595	GEMIN8	Gem-associated protein 8; Uncharacterized protein [Source:UniProtKB/TrEMBL;Acc:F7CL46]	ENSMMUT00000019083	601	750	+
ENSMMUG00000009050	MBD1	Uncharacterized protein [Source:UniProtKB/TrEMBL;Acc:F7CL60]	ENSMMUT00000012652	861	1005	+
ENSMMUG00000009051	CXXC1	CpG-binding protein isoform 2; Uncharacterized protein [Source:UniProtKB/TrEMBL;Acc:F7FBL1]	ENSMMUT00000012656	1651	1840	+
ENSMMUG00000022001	ME2	malic enzyme 2, NAD(+)-dependent, mitochondrial [Source:HGNC Symbol;Acc:HGNC:6984]	ENSMMUT00000030960	891	1140	+
ENSMMUG00000018334	SMAD4	Mothers against decapentaplegic homolog 4; Mothers against decapentaplegic-like protein 4; Uncharacterized protein [Source:UniProtKB/TrEMBL;Acc:F7H894]	ENSMMUT00000025767	1	160	+
ENSMMUG00000023652	MEX3C	mex-3 RNA binding family member C [Source:HGNC Symbol;Acc:HGNC:28040]	ENSMMUT00000033272	1381	1633	+
ENSMMUG00000014055	AP1S2	Uncharacterized protein [Source:UniProtKB/TrEMBL;Acc:F7AGB8]	ENSMMUT00000019731	361	550	+
ENSMMUG00000003136	MBD2	Uncharacterized protein [Source:UniProtKB/TrEMBL;Acc:F7CL90]	ENSMMUT00000004444	1401	1580	+
ENSMMUG00000016237	TXLNG	Environmental lipopolysaccharide-responding gene protein; Uncharacterized protein [Source:UniProtKB/TrEMBL;Acc:F7GH86]	ENSMMUT00000022813	1461	1610	+
ENSMMUG00000012001	TCF4	transcription factor 4 [Source:HGNC Symbol;Acc:HGNC:11634]	ENSMMUT00000048171	2061	2384	+
ENSMMUG00000012916	WDR7	WD repeat domain 7 [Source:HGNC Symbol;Acc:HGNC:13490]	ENSMMUT00000018117	2341	2820	+
ENSMMUG00000022568	FECH	ferrochelatase [Source:HGNC Symbol;Acc:HGNC:3647]	ENSMMUT00000031752	1371	1640	+
ENSMMUG00000019974	NARS	asparaginyl-tRNA synthetase [Source:HGNC Symbol;Acc:HGNC:7643]	ENSMMUT00000048160	1581	1710	+
ENSMMUG00000006616	NEDD4L	neural precursor cell expressed, developmentally down-regulated 4-like, E3 ubiquitin protein ligase [Source:HGNC Symbol;Acc:HGNC:7728]	ENSMMUT00000009279	2817	3099	+
ENSMMUG00000020513	PHKA2	Uncharacterized protein [Source:UniProtKB/TrEMBL;Acc:F7AXU3]	ENSMMUT00000028871	3971	4370	+
ENSMMUG00000006635	ALPK2	alpha-kinase 2 [Source:HGNC Symbol;Acc:HGNC:20565]	ENSMMUT00000009287	4841	5030	+
ENSMMUG00000014235	MALT1	Uncharacterized protein [Source:UniProtKB/TrEMBL;Acc:F7D797]	ENSMMUT00000019975	2211	2902	+
ENSMMUG00000012622	PMAIP1	Phorbol-12-myristate-13-acetate-induced protein 1; Uncharacterized protein [Source:UniProtKB/TrEMBL;Acc:F7F0V0]	ENSMMUT00000017701	181	610	+
ENSMMUG00000002209	KIAA1468	KIAA1468 [Source:HGNC Symbol;Acc:HGNC:29289]	ENSMMUT00000003126	3209	3417	+
ENSMMUG00000004434	ZCCHC2	zinc finger, CCHC domain containing 2 [Source:HGNC Symbol;Acc:HGNC:22916]	ENSMMUT00000006285	2301	2764	+
ENSMMUG00000006578	KDSR	3-ketodihydrosphingosine reductase; Uncharacterized protein [Source:UniProtKB/TrEMBL;Acc:F7HPT5]	ENSMMUT00000009209	1094	1350	+
ENSMMUG00000021184	VPS4B	Suppressor of K(+) transport growth defect 1; Uncharacterized protein; Vacuolar protein sorting-associated protein 4B [Source:UniProtKB/TrEMBL;Acc:F7H6D5]	ENSMMUT00000029805	341	620	+
ENSMMUG00000002134	RPS6KA3	ribosomal protein S6 kinase, 90kDa, polypeptide 3 [Source:HGNC Symbol;Acc:HGNC:10432]	ENSMMUT00000003012	2161	2541	+
ENSMMUG00000017728	TMX3	Protein disulfide-isomerase TMX3; Uncharacterized protein [Source:UniProtKB/TrEMBL;Acc:F7F8A3]	ENSMMUT00000024918	1861	1962	+
ENSMMUG00000018824	ACOT9	acyl-CoA thioesterase 9 [Source:HGNC Symbol;Acc:HGNC:17152]	ENSMMUT00000026466	1401	1533	+
ENSMMUG00000009241	CD226	Macaca mulatta CD226 molecule (CD226), mRNA. [Source:RefSeq mRNA;Acc:NM_001042643]	ENSMMUT00000012914	931	1090	+
ENSMMUG00000006979	EIF2S3	Uncharacterized protein [Source:UniProtKB/TrEMBL;Acc:F7DQV0]	ENSMMUT00000009753	2051	2250	+
ENSMMUG00000032499		L-lactate dehydrogenase [Source:UniProtKB/TrEMBL;Acc:F7BCH4]	ENSMMUT00000048116	681	780	+
ENSMMUG00000012819	PDK3	pyruvate dehydrogenase kinase, isozyme 3 [Source:HGNC Symbol;Acc:HGNC:8811]	ENSMMUT00000017985	1111	1210	+
ENSMMUG00000018433	POLA1	DNA polymerase [Source:UniProtKB/TrEMBL;Acc:F7HF26]	ENSMMUT00000025916	761	960	+
ENSMMUG00000009151	CTDP1	CTD (carboxy-terminal domain, RNA polymerase II, polypeptide A) phosphatase, subunit 1 [Source:HGNC Symbol;Acc:HGNC:2498]	ENSMMUT00000012797	1141	1470	+
ENSMMUG00000001613	TXNL4A	Thioredoxin-like protein 4A; Uncharacterized protein [Source:UniProtKB/TrEMBL;Acc:F7GUX1]	ENSMMUT00000002279	761	867	+
ENSMMUG00000014855	RBFA	ribosome binding factor A (putative) [Source:HGNC Symbol;Acc:HGNC:26120]	ENSMMUT00000020843	671	1030	+
ENSMMUG00000013710	ADNP2	ADNP homeobox protein 2; Uncharacterized protein; Zinc finger protein 508 [Source:UniProtKB/TrEMBL;Acc:F6S545]	ENSMMUT00000019249	2131	2270	+
ENSMMUG00000013220	CYBB	Cytochrome b-245 heavy chain; Uncharacterized protein [Source:UniProtKB/TrEMBL;Acc:F6X7S5]	ENSMMUT00000018545	3158	3380	+
ENSMMUG00000012762	ATP6AP2	Renin receptor; Renin/prorenin receptor; Uncharacterized protein [Source:UniProtKB/TrEMBL;Acc:F7EMR9]	ENSMMUT00000017907	1131	1290	+
ENSMMUG00000005263	CXorf38	chromosome X open reading frame 38 [Source:HGNC Symbol;Acc:HGNC:28589]	ENSMMUT00000007407	597	920	+
ENSMMUG00000005264	MED14	Uncharacterized protein [Source:UniProtKB/TrEMBL;Acc:F7BPL6]	ENSMMUT00000007409	4431	4700	+
ENSMMUG00000013753	USP9X	Ubiquitin carboxyl-terminal hydrolase [Source:UniProtKB/TrEMBL;Acc:F6RFN9]	ENSMMUT00000019313	7481	7923	+
ENSMMUG00000017569	DDX3X	Uncharacterized protein [Source:UniProtKB/TrEMBL;Acc:F6WRP9]	ENSMMUT00000024715	1	120	+
ENSMMUG00000008224			ENSMMUT00000011496	1	140	+
ENSMMUG00000032474		Uncharacterized protein [Source:UniProtKB/TrEMBL;Acc:F7BRA6]	ENSMMUT00000048076	505	712	+
ENSMMUG00000003317	KDM6A	lysine (K)-specific demethylase 6A [Source:HGNC Symbol;Acc:HGNC:12637]	ENSMMUT00000004692	3431	3580	+
ENSMMUG00000002986		Uncharacterized protein [Source:UniProtKB/TrEMBL;Acc:F6R697]	ENSMMUT00000002323	351	457	+
ENSMMUG00000019663	CHST7	Carbohydrate sulfotransferase 7; Uncharacterized protein [Source:UniProtKB/TrEMBL;Acc:F7CNI9]	ENSMMUT00000027623	1651	1890	+
ENSMMUG00000003897	SLC9A7	Sodium/hydrogen exchanger [Source:UniProtKB/TrEMBL;Acc:F7H3I0]	ENSMMUT00000005520	1265	1546	+
ENSMMUG00000023016	JADE3	jade family PHD finger 3 [Source:HGNC Symbol;Acc:HGNC:22982]	ENSMMUT00000032388	1841	2250	+
ENSMMUG00000017422	NDUFB11	Uncharacterized protein [Source:UniProtKB/TrEMBL;Acc:F7HPV6]	ENSMMUT00000024503	991	1100	+
ENSMMUG00000017423	RBM10	Uncharacterized protein [Source:UniProtKB/TrEMBL;Acc:F7BRT1]	ENSMMUT00000024508	2351	2510	+
ENSMMUG00000017428	UBA1	ubiquitin-like modifier activating enzyme 1 [Source:HGNC Symbol;Acc:HGNC:12469]	ENSMMUT00000048061	3221	3410	+
ENSMMUG00000014002	CDK16	cyclin-dependent kinase 16 [Source:HGNC Symbol;Acc:HGNC:8749]	ENSMMUT00000019651	1411	1520	+
ENSMMUG00000016608	USP11	Ubiquitin carboxyl-terminal hydrolase [Source:UniProtKB/TrEMBL;Acc:F6TXQ2]	ENSMMUT00000023336	811	940	+
ENSMMUG00000011418	ARAF	v-raf murine sarcoma 3611 viral oncogene homolog [Source:HGNC Symbol;Acc:HGNC:646]	ENSMMUT00000015986	591	710	+
ENSMMUG00000011426	TIMP1	Macaca mulatta TIMP metallopeptidase inhibitor 1 (TIMP1), mRNA. [Source:RefSeq mRNA;Acc:NM_001032939]	ENSMMUT00000015998	751	890	+
ENSMMUG00000032465	CFP	complement factor properdin [Source:HGNC Symbol;Acc:HGNC:8864]	ENSMMUT00000048055	1181	1390	+
ENSMMUG00000019420	ELK1	ELK1, member of ETS oncogene family [Source:HGNC Symbol;Acc:HGNC:3321]	ENSMMUT00000027292	1501	1764	+
ENSMMUG00000016975	SLC38A5	solute carrier family 38, member 5 [Source:HGNC Symbol;Acc:HGNC:18070]	ENSMMUT00000023855	1491	1800	+
ENSMMUG00000018894	FTSJ1	Putative ribosomal RNA methyltransferase 1 isoform b; Uncharacterized protein [Source:UniProtKB/TrEMBL;Acc:F7A6V3]	ENSMMUT00000026559	1211	1603	+
ENSMMUG00000018336	EBP	Uncharacterized protein [Source:UniProtKB/TrEMBL;Acc:F7H890]	ENSMMUT00000025769	261	390	+
ENSMMUG00000018335	TBC1D25	Uncharacterized protein [Source:UniProtKB/TrEMBL;Acc:F7CH11]	ENSMMUT00000025768	1331	1470	+
ENSMMUG00000004439		Uncharacterized protein [Source:UniProtKB/TrEMBL;Acc:F7EEK9]	ENSMMUT00000006295	1681	1840	+
ENSMMUG00000015396	WDR13	WD repeat domain 13 [Source:HGNC Symbol;Acc:HGNC:14352]	ENSMMUT00000021585	101	280	+
ENSMMUG00000019767	WAS	Wiskott-Aldrich syndrome [Source:HGNC Symbol;Acc:HGNC:12731]	ENSMMUT00000027786	6	120	+
ENSMMUG00000016465	HDAC6	Uncharacterized protein [Source:UniProtKB/TrEMBL;Acc:F7GBE5]	ENSMMUT00000023129	3931	4100	+
ENSMMUG00000004547	TIMM17B	Mitochondrial import inner membrane translocase subunit Tim17-B; Mitochondrial import inner membrane translocase subunit Tim17-B isoform 2; Uncharacterized protein [Source:UniProtKB/TrEMBL;Acc:F6S5R4]	ENSMMUT00000006430	831	940	+
ENSMMUG00000004548	PQBP1	Polyglutamine-binding protein 1; Polyglutamine-binding protein 1 isoform 1; Uncharacterized protein [Source:UniProtKB/TrEMBL;Acc:F6S5L8]	ENSMMUT00000006434	331	589	+
ENSMMUG00000004553	SLC35A2	UDP-galactose translocator isoform a; Uncharacterized protein [Source:UniProtKB/TrEMBL;Acc:F6S505]	ENSMMUT00000048045	1181	1370	+
ENSMMUG00000004557	PIM2	Serine/threonine-protein kinase pim-2; Uncharacterized protein [Source:UniProtKB/TrEMBL;Acc:F6S4X1]	ENSMMUT00000006443	1669	1770	+
ENSMMUG00000020059	GRIPAP1	GRIP1 associated protein 1 [Source:HGNC Symbol;Acc:HGNC:18706]	ENSMMUT00000028205	291	410	+
ENSMMUG00000023494	TFE3	Transcription factor E3; Uncharacterized protein [Source:UniProtKB/TrEMBL;Acc:F7E2P9]	ENSMMUT00000033057	2071	2240	+
ENSMMUG00000010620	WDR45	Uncharacterized protein [Source:UniProtKB/TrEMBL;Acc:F7BK22]	ENSMMUT00000048038	1508	1730	+
ENSMMUG00000023022	PLP2	Intestinal membrane A4 protein; Proteolipid protein 2; Uncharacterized protein [Source:UniProtKB/TrEMBL;Acc:F6VM49]	ENSMMUT00000032395	541	680	+
ENSMMUG00000023024	PRICKLE3	prickle homolog 3 (Drosophila) [Source:HGNC Symbol;Acc:HGNC:6645]	ENSMMUT00000032398	1771	1950	+
ENSMMUG00000008623	CCDC22	Coiled-coil domain-containing protein 22; Uncharacterized protein [Source:UniProtKB/TrEMBL;Acc:F7FCZ3]	ENSMMUT00000012053	2181	2300	+
ENSMMUG00000021120	MAGED1	melanoma antigen family D, 1 [Source:HGNC Symbol;Acc:HGNC:6813]	ENSMMUT00000029705	1211	1400	+
ENSMMUG00000020553	KDM5C	Uncharacterized protein [Source:UniProtKB/TrEMBL;Acc:F7CUG7]	ENSMMUT00000028923	541	770	+
ENSMMUG00000009296	HSD17B10	Uncharacterized protein [Source:UniProtKB/TrEMBL;Acc:F7CV42]	ENSMMUT00000012994	18	150	+
ENSMMUG00000006362	HUWE1	HECT, UBA and WWE domain containing 1, E3 ubiquitin protein ligase [Source:HGNC Symbol;Acc:HGNC:30892]	ENSMMUT00000008929	13458	13800	+
ENSMMUG00000008751	PHF8	PHD finger protein 8 [Source:HGNC Symbol;Acc:HGNC:20672]	ENSMMUT00000012232	4071	4360	+
ENSMMUG00000008422	TRO	Uncharacterized protein [Source:UniProtKB/TrEMBL;Acc:F6VBW8]	ENSMMUT00000011774	3411	3690	+
ENSMMUG00000008428	APEX2	DNA-(Apurinic or apyrimidinic site) lyase 2; Uncharacterized protein [Source:UniProtKB/TrEMBL;Acc:F6VBU4]	ENSMMUT00000011782	1261	1400	+
ENSMMUG00000002442		Uncharacterized protein [Source:UniProtKB/TrEMBL;Acc:F6PJ83]	ENSMMUT00000003482	631	800	+
ENSMMUG00000011534	MAGEH1	MAGE-H1 antigen; Melanoma-associated antigen H1; Uncharacterized protein [Source:UniProtKB/TrEMBL;Acc:F7BZI8]	ENSMMUT00000016157	701	950	+
ENSMMUG00000012836	UBQLN2	Protein linking IAP with cytoskeleton 2; Ubiquilin-2; Uncharacterized protein [Source:UniProtKB/TrEMBL;Acc:F6TBT9]	ENSMMUT00000018007	1921	2100	+
ENSMMUG00000012391		Uncharacterized protein [Source:UniProtKB/TrEMBL;Acc:F7EAP2]	ENSMMUT00000017374	201	350	+
ENSMMUG00000009813			ENSMMUT00000013709	530	672	+
ENSMMUG00000003922	LAS1L	LAS1-like (S. cerevisiae) [Source:HGNC Symbol;Acc:HGNC:25726]	ENSMMUT00000005558	1602	1890	+
ENSMMUG00000015031	EDA2R	Uncharacterized protein [Source:UniProtKB/TrEMBL;Acc:F6TM24]	ENSMMUT00000021072	791	960	+
ENSMMUG00000020965	EFNB1	EPH-related receptor tyrosine kinase ligand 2; Ephrin-B1; Uncharacterized protein [Source:UniProtKB/TrEMBL;Acc:F7H0J3]	ENSMMUT00000029484	1611	1975	+
ENSMMUG00000006416	FAM155B	family with sequence similarity 155, member B [Source:HGNC Symbol;Acc:HGNC:30701]	ENSMMUT00000008996	78	390	+
ENSMMUG00000013929			ENSMMUT00000047964	741	950	+
ENSMMUG00000013948	DLG3	Uncharacterized protein [Source:UniProtKB/TrEMBL;Acc:F6SE42]	ENSMMUT00000047963	4221	4360	+
ENSMMUG00000032428	CXHXORF65	Uncharacterized protein [Source:UniProtKB/TrEMBL;Acc:F6UBR1]	ENSMMUT00000047957	391	544	+
ENSMMUG00000017797	MED12	Uncharacterized protein [Source:UniProtKB/TrEMBL;Acc:F7E1A2]	ENSMMUT00000025014	6303	6570	+
ENSMMUG00000000667	ZMYM3	Uncharacterized protein; Zinc finger MYM-type protein 3 isoform 1 [Source:UniProtKB/TrEMBL;Acc:F6UBU8]	ENSMMUT00000000961	4591	4720	+
ENSMMUG00000020481	NONO	Non-POU domain-containing octamer-binding protein; Non-POU domain-containing octamer-binding protein isoform 1; Uncharacterized protein [Source:UniProtKB/TrEMBL;Acc:F6UC36]	ENSMMUT00000028825	1081	1360	+
ENSMMUG00000005663	TAF1	TAF1 RNA polymerase II, TATA box binding protein (TBP)-associated factor, 250kDa [Source:HGNC Symbol;Acc:HGNC:11535]	ENSMMUT00000007963	5321	5487	+
ENSMMUG00000032425			ENSMMUT00000047947	851	1040	+
ENSMMUG00000015238	OGT	O-linked N-acetylglucosamine (GlcNAc) transferase [Source:HGNC Symbol;Acc:HGNC:8127]	ENSMMUT00000021361	2547	2790	+
ENSMMUG00000032422			ENSMMUT00000019587	573	696	+
ENSMMUG00000003295	RPS4Y2	40S ribosomal protein S4, Y isoform 2 [Source:RefSeq peptide;Acc:NP_001138538]	ENSMMUT00000031304	712	850	+
ENSMMUG00000032418			ENSMMUT00000047939	1	125	+
ENSMMUG00000015619	ABCB7	Uncharacterized protein [Source:UniProtKB/TrEMBL;Acc:F6RUB1]	ENSMMUT00000021913	2101	2340	+
ENSMMUG00000021204	UPRT	Uncharacterized protein [Source:UniProtKB/TrEMBL;Acc:F6UIX9]	ENSMMUT00000047936	131	270	+
ENSMMUG00000019569	CXHXORF26	UPF0368 protein Cxorf26; Uncharacterized protein [Source:UniProtKB/TrEMBL;Acc:F7BGP6]	ENSMMUT00000027489	921	1140	+
ENSMMUG00000022574	ATRX	Uncharacterized protein [Source:UniProtKB/TrEMBL;Acc:F6UJ05]	ENSMMUT00000047933	4611	4780	+
ENSMMUG00000014407	MAGT1	magnesium transporter 1 [Source:HGNC Symbol;Acc:HGNC:28880]	ENSMMUT00000020218	1	241	+
ENSMMUG00000012874	PGK1	Phosphoglycerate kinase [Source:UniProtKB/TrEMBL;Acc:F6SFZ4]	ENSMMUT00000047930	1701	1802	+
ENSMMUG00000003564	ITM2A	Integral membrane protein 2A isoform 1; Protein E25; Uncharacterized protein [Source:UniProtKB/TrEMBL;Acc:F7ETL1]	ENSMMUT00000005036	41	160	+
ENSMMUG00000010763	BRWD3	bromodomain and WD repeat domain containing 3 [Source:HGNC Symbol;Acc:HGNC:17342]	ENSMMUT00000015047	4614	5243	+
ENSMMUG00000032410		40S ribosomal protein S24 [Source:UniProtKB/TrEMBL;Acc:F7GV47]	ENSMMUT00000015049	201	372	+
ENSMMUG00000004335	APOOL	apolipoprotein O-like [Source:HGNC Symbol;Acc:HGNC:24009]	ENSMMUT00000047910	511	650	+
ENSMMUG00000016776	CHM	choroideremia (Rab escort protein 1) [Source:HGNC Symbol;Acc:HGNC:1940]	ENSMMUT00000023568	1881	2110	+
ENSMMUG00000008534			ENSMMUT00000011930	1	105	+
ENSMMUG00000000126	PINK1	Serine/threonine-protein kinase PINK1, mitochondrial; Uncharacterized protein [Source:UniProtKB/TrEMBL;Acc:F7H674]	ENSMMUT00000000181	1745	2383	+
ENSMMUG00000013008	CSTF2	Uncharacterized protein [Source:UniProtKB/TrEMBL;Acc:F7HR34]	ENSMMUT00000018243	1201	1430	+
ENSMMUG00000019572	TIMM8A	Mitochondrial import inner membrane translocase subunit Tim8 A isoform 1; Uncharacterized protein [Source:UniProtKB/TrEMBL;Acc:F7BGN5]	ENSMMUT00000027490	161	370	+
ENSMMUG00000019573	BTK	Uncharacterized protein [Source:UniProtKB/TrEMBL;Acc:F6UTT6]	ENSMMUT00000027493	1111	1330	+
ENSMMUG00000019577	GLA	Alpha-galactosidase A; Uncharacterized protein [Source:UniProtKB/TrEMBL;Acc:F7BGG3]	ENSMMUT00000027499	1101	1292	+
ENSMMUG00000019580	HNRPH1	Heterogeneous nuclear ribonucleoprotein H2; Uncharacterized protein [Source:UniProtKB/TrEMBL;Acc:F7BG13]	ENSMMUT00000027500	251	730	+
ENSMMUG00000032394	ARMCX6	armadillo repeat containing, X-linked 6 [Source:HGNC Symbol;Acc:HGNC:26094]	ENSMMUT00000047884	1	345	+
ENSMMUG00000015655	ARMCX3	ARM protein lost in epithelial cancers on chromosome X 3; Armadillo repeat-containing X-linked protein 3; Uncharacterized protein [Source:UniProtKB/TrEMBL;Acc:F6RKR8]	ENSMMUT00000021960	361	810	+
ENSMMUG00000015656	ARMCX2	ARM protein lost in epithelial cancers on chromosome X 2; Armadillo repeat-containing X-linked protein 2; Uncharacterized protein [Source:UniProtKB/TrEMBL;Acc:F6V1Q3]	ENSMMUT00000047883	1545	1740	+
ENSMMUG00000005291	ARMCX5	Uncharacterized protein [Source:UniProtKB/TrEMBL;Acc:F7BBB8]	ENSMMUT00000007443	1001	1220	+
ENSMMUG00000010501	WBP5	Uncharacterized protein; WW domain-binding protein 5 [Source:UniProtKB/TrEMBL;Acc:F7B998]	ENSMMUT00000014694	241	470	+
ENSMMUG00000006111		Uncharacterized protein [Source:UniProtKB/TrEMBL;Acc:F7B6E6]	ENSMMUT00000047866	290	892	+
ENSMMUG00000022281	FAM199X	Protein FAM199X; Putative uncharacterized protein FAM199X; Uncharacterized protein [Source:UniProtKB/TrEMBL;Acc:F6XFJ3]	ENSMMUT00000031340	1201	1330	+
ENSMMUG00000004674	PRPS1	Ribose-phosphate pyrophosphokinase 1 isoform 1; Uncharacterized protein [Source:UniProtKB/TrEMBL;Acc:F6RUH7]	ENSMMUT00000006603	631	810	+
ENSMMUG00000008207	TSC22D3	TSC22 domain family protein 3 isoform 1; Uncharacterized protein [Source:UniProtKB/TrEMBL;Acc:F6WLE5]	ENSMMUT00000047859	1281	1440	+
ENSMMUG00000016981	PSMD10	Uncharacterized protein [Source:UniProtKB/TrEMBL;Acc:F6WLI1]	ENSMMUT00000023864	74	253	+
ENSMMUG00000007190	ATG4A	Uncharacterized protein [Source:UniProtKB/TrEMBL;Acc:F6WLJ1]	ENSMMUT00000010047	1481	2013	+
ENSMMUG00000013204	NXT2	Uncharacterized protein [Source:UniProtKB/TrEMBL;Acc:F6XG89]	ENSMMUT00000018521	1524	1670	+
ENSMMUG00000004188	ACSL4	Uncharacterized protein [Source:UniProtKB/TrEMBL;Acc:F6WSX9]	ENSMMUT00000005948	2001	2250	+
ENSMMUG00000022822	TMEM164	Transmembrane protein 164; Transmembrane protein 164 isoform b; Uncharacterized protein [Source:UniProtKB/TrEMBL;Acc:F6UNP1]	ENSMMUT00000047846	1001	1230	+
ENSMMUG00000017109		Purine nucleoside phosphorylase [Source:UniProtKB/TrEMBL;Acc:F7H566]	ENSMMUT00000024056	41	180	+
ENSMMUG00000011497	WDR44	Uncharacterized protein [Source:UniProtKB/TrEMBL;Acc:F6WUC2]	ENSMMUT00000047830	1571	1790	+
ENSMMUG00000011498	DOCK11	Uncharacterized protein [Source:UniProtKB/TrEMBL;Acc:F6WUE6]	ENSMMUT00000047828	5341	5510	+
ENSMMUG00000022665	CXorf56	chromosome X open reading frame 56 [Source:HGNC Symbol;Acc:HGNC:26239]	ENSMMUT00000031888	471	600	+
ENSMMUG00000022670	NKRF	NF-kappa-B-repressing factor; NF-kappa-B-repressing factor isoform 2; Uncharacterized protein [Source:UniProtKB/TrEMBL;Acc:F7GU34]	ENSMMUT00000031899	2391	2670	+
ENSMMUG00000017669	2015-09-06	Septin-6 isoform D; Uncharacterized protein [Source:UniProtKB/TrEMBL;Acc:F6TJ60]	ENSMMUT00000047822	1151	1479	+
ENSMMUG00000011079		Uncharacterized protein [Source:UniProtKB/TrEMBL;Acc:F7FX75]	ENSMMUT00000015489	1	100	+
ENSMMUG00000011076	ZBTB33	Transcriptional regulator Kaiso; Uncharacterized protein [Source:UniProtKB/TrEMBL;Acc:F7FX83]	ENSMMUT00000015486	1941	2040	+
ENSMMUG00000009037	CUL4B	cullin 4B [Source:HGNC Symbol;Acc:HGNC:2555]	ENSMMUT00000012636	3051	3240	+
ENSMMUG00000003745	THOC2	Uncharacterized protein [Source:UniProtKB/TrEMBL;Acc:F6RSZ2]	ENSMMUT00000005302	4031	4540	+
ENSMMUG00000020695	SASH3	SAM and SH3 domain containing 3 [Source:HGNC Symbol;Acc:HGNC:15975]	ENSMMUT00000029109	2481	2610	+
ENSMMUG00000020699	ZDHHC9	zinc finger, DHHC-type containing 9 [Source:HGNC Symbol;Acc:HGNC:18475]	ENSMMUT00000029113	1221	1380	+
ENSMMUG00000008785	ELF4	E74-like factor 4 (ets domain transcription factor) [Source:HGNC Symbol;Acc:HGNC:3319]	ENSMMUT00000012274	1261	1440	+
ENSMMUG00000008389	RBMX2	RNA-binding motif protein, X-linked 2; Uncharacterized protein [Source:UniProtKB/TrEMBL;Acc:F6TRP5]	ENSMMUT00000047799	621	890	+
ENSMMUG00000016588	RAP2C	Ras-related protein Rap-2c; Uncharacterized protein [Source:UniProtKB/TrEMBL;Acc:F6VPD5]	ENSMMUT00000023294	1011	1395	+
ENSMMUG00000003071	MBNL3	Uncharacterized protein [Source:UniProtKB/TrEMBL;Acc:F6TSM1]	ENSMMUT00000004346	2341	2520	+
ENSMMUG00000007997	PHF6	PHD finger protein 6 isoform 1; Uncharacterized protein [Source:UniProtKB/TrEMBL;Acc:F7HLJ3]	ENSMMUT00000011185	1081	1303	+
ENSMMUG00000021258	SMIM10	small integral membrane protein 10 [Source:HGNC Symbol;Acc:HGNC:41913]	ENSMMUT00000029914	301	400	+
ENSMMUG00000022138		Uncharacterized protein [Source:UniProtKB/TrEMBL;Acc:F7H3F2]	ENSMMUT00000031140	391	540	+
ENSMMUG00000022140		Uncharacterized protein [Source:UniProtKB/TrEMBL;Acc:F6TZ10]	ENSMMUT00000031141	691	880	+
ENSMMUG00000017881	DDX26B	Uncharacterized protein [Source:UniProtKB/TrEMBL;Acc:F7F5N7]	ENSMMUT00000025125	2821	2920	+
ENSMMUG00000011271	SLC9A6	Sodium/hydrogen exchanger [Source:UniProtKB/TrEMBL;Acc:F6WNU8]	ENSMMUT00000015764	4111	4419	+
ENSMMUG00000006450	HTATSF1	Uncharacterized protein [Source:UniProtKB/TrEMBL;Acc:F7HDT6]	ENSMMUT00000009046	1691	1810	+
ENSMMUG00000013768	ARHGEF6	Rac/Cdc42 guanine nucleotide exchange factor (GEF) 6 [Source:HGNC Symbol;Acc:HGNC:685]	ENSMMUT00000019339	2021	2310	+
ENSMMUG00000000671		Uncharacterized protein [Source:UniProtKB/TrEMBL;Acc:F6Z0U3]	ENSMMUT00000000964	1101	1590	+
ENSMMUG00000006801	CXORF40A	Protein CXorf40A isoform a; Uncharacterized protein [Source:UniProtKB/TrEMBL;Acc:F7H1B2]	ENSMMUT00000047744	831	960	+
ENSMMUG00000016610	CD99L2	Uncharacterized protein [Source:UniProtKB/TrEMBL;Acc:F6TWW6]	ENSMMUT00000023341	871	1090	+
ENSMMUG00000004633	HMGB3	high mobility group box 3 [Source:HGNC Symbol;Acc:HGNC:5004]	ENSMMUT00000006553	481	663	+
ENSMMUG00000009034	VMA21	Uncharacterized protein; Vacuolar ATPase assembly integral membrane protein VMA21 [Source:UniProtKB/TrEMBL;Acc:F7FG76]	ENSMMUT00000012627	361	515	+
ENSMMUG00000013176	NSDHL	Sterol-4-alpha-carboxylate 3-dehydrogenase, decarboxylating; Uncharacterized protein [Source:UniProtKB/TrEMBL;Acc:F6XR64]	ENSMMUT00000018484	1201	1479	+
ENSMMUG00000011480	FAM58A	Cyclin-related protein FAM58A isoform 1; Uncharacterized protein [Source:UniProtKB/TrEMBL;Acc:F7D906]	ENSMMUT00000016078	809	1305	+
ENSMMUG00000012744	BCAP31	Uncharacterized protein [Source:UniProtKB/TrEMBL;Acc:F7ESN9]	ENSMMUT00000017877	891	990	+
ENSMMUG00000003374	IDH3G	isocitrate dehydrogenase 3 (NAD+) gamma [Source:HGNC Symbol;Acc:HGNC:5386]	ENSMMUT00000004770	881	1090	+
ENSMMUG00000000319	HCFC1	host cell factor C1 [Source:HGNC Symbol;Acc:HGNC:4839]	ENSMMUT00000000463	4811	4940	+
ENSMMUG00000018704	MECP2	Uncharacterized protein [Source:UniProtKB/TrEMBL;Acc:F6YIN8]	ENSMMUT00000026295	1011	1669	+
ENSMMUG00000013668	FLNA	Uncharacterized protein [Source:UniProtKB/TrEMBL;Acc:F6YS48]	ENSMMUT00000019204	3531	3690	+
ENSMMUG00000005494		60S ribosomal protein L10; Uncharacterized protein [Source:UniProtKB/TrEMBL;Acc:F7FYP5]	ENSMMUT00000007732	737	848	+
ENSMMUG00000005495	DNASE1L1	Deoxyribonuclease [Source:UniProtKB/TrEMBL;Acc:F7FYN3]	ENSMMUT00000007734	1941	2110	+
ENSMMUG00000005498	TAZ	Tafazzin [Source:UniProtKB/Swiss-Prot;Acc:Q6IV77]	ENSMMUT00000047724	1201	1370	+
ENSMMUG00000005502	GDI1	Rab GDP dissociation inhibitor alpha; Uncharacterized protein [Source:UniProtKB/TrEMBL;Acc:F7FLQ1]	ENSMMUT00000007745	2111	2230	+
ENSMMUG00000005505	FAM50A	family with sequence similarity 50, member A [Source:HGNC Symbol;Acc:HGNC:18786]	ENSMMUT00000007747	281	500	+
ENSMMUG00000009015	UBL4A	Ubiquitin-like protein 4A; Uncharacterized protein [Source:UniProtKB/TrEMBL;Acc:F7FHB2]	ENSMMUT00000012596	1741	1930	+
ENSMMUG00000009012	FAM3A	family with sequence similarity 3, member A [Source:HGNC Symbol;Acc:HGNC:13749]	ENSMMUT00000047720	581	710	+
ENSMMUG00000017409	G6PD	glucose-6-phosphate dehydrogenase [Source:HGNC Symbol;Acc:HGNC:4057]	ENSMMUT00000024487	2171	2330	+
ENSMMUG00000005768	DKC1	H/ACA ribonucleoprotein complex subunit 4 isoform 1; Uncharacterized protein [Source:UniProtKB/TrEMBL;Acc:F6W1E4]	ENSMMUT00000008100	1431	1830	+
ENSMMUG00000010248	FUNDC2	FUN14 domain-containing protein 2 [Source:UniProtKB/TrEMBL;Acc:F6QM97]	ENSMMUT00000014327	451	570	+
ENSMMUG00000023099	LRPAP1	low density lipoprotein receptor-related protein associated protein 1 [Source:HGNC Symbol;Acc:HGNC:6701]	ENSMMUT00000032498	1301	1420	+
ENSMMUG00000015095	VBP1	Uncharacterized protein [Source:UniProtKB/TrEMBL;Acc:F6WUT9]	ENSMMUT00000021153	241	527	+
ENSMMUG00000009476	F8A1	Factor VIII intron 22 protein [Source:UniProtKB/TrEMBL;Acc:H9F759]	ENSMMUT00000013225	761	960	+
ENSMMUG00000032308		60S ribosome subunit biogenesis protein NIP7 homolog [Source:UniProtKB/TrEMBL;Acc:F7GMN1]	ENSMMUT00000047709	552	740	+
ENSMMUG00000002015	VAMP7	Uncharacterized protein [Source:UniProtKB/TrEMBL;Acc:F6UTB2]	ENSMMUT00000002855	551	828	+
ENSMMUG00000008392	HTT	huntingtin [Source:HGNC Symbol;Acc:HGNC:4851]	ENSMMUT00000011739	13083	13281	+
ENSMMUG00000008385	NOP14	NOP14 nucleolar protein [Source:HGNC Symbol;Acc:HGNC:16821]	ENSMMUT00000011729	1211	1310	+
ENSMMUG00000008383	MFSD10	Uncharacterized protein [Source:UniProtKB/TrEMBL;Acc:F7HMH5]	ENSMMUT00000011722	1	210	+
ENSMMUG00000008379	ADD1	Uncharacterized protein [Source:UniProtKB/TrEMBL;Acc:F7HMH8]	ENSMMUT00000011718	211	330	+
ENSMMUG00000013158	FAM193A	family with sequence similarity 193, member A [Source:HGNC Symbol;Acc:HGNC:16822]	ENSMMUT00000018460	3121	3380	+
ENSMMUG00000007948	RNF4	ring finger protein 4 [Source:HGNC Symbol;Acc:HGNC:10067]	ENSMMUT00000011120	471	570	+
ENSMMUG00000001160	MXD4	Uncharacterized protein [Source:UniProtKB/TrEMBL;Acc:F6RHV5]	ENSMMUT00000001636	501	630	+
ENSMMUG00000009944	NELFA	negative elongation factor complex member A [Source:HGNC Symbol;Acc:HGNC:12768]	ENSMMUT00000013885	2771	2891	+
ENSMMUG00000009943	WHSC1	Uncharacterized protein [Source:UniProtKB/TrEMBL;Acc:F6RJF5]	ENSMMUT00000013882	3081	3240	+
ENSMMUG00000011191	TACC3	transforming, acidic coiled-coil containing protein 3 [Source:HGNC Symbol;Acc:HGNC:11524]	ENSMMUT00000015655	871	1190	+
ENSMMUG00000011190	TMEM129	transmembrane protein 129 [Source:HGNC Symbol;Acc:HGNC:25137]	ENSMMUT00000015651	451	630	+
ENSMMUG00000008357	MAEA	Uncharacterized protein [Source:UniProtKB/TrEMBL;Acc:F7GP35]	ENSMMUT00000011684	1401	1790	+
ENSMMUG00000008323	CTBP1	C-terminal-binding protein 1 isoform 2; Uncharacterized protein [Source:UniProtKB/TrEMBL;Acc:F7GP87]	ENSMMUT00000047694	1941	2070	+
ENSMMUG00000032299	IDUA	iduronidase, alpha-L- [Source:HGNC Symbol;Acc:HGNC:5391]	ENSMMUT00000047691	761	960	+
ENSMMUG00000017221	TMEM175	Uncharacterized protein [Source:UniProtKB/TrEMBL;Acc:F7GPA0]	ENSMMUT00000024206	1081	1260	+
ENSMMUG00000016919	GAK	cyclin G associated kinase [Source:HGNC Symbol;Acc:HGNC:4113]	ENSMMUT00000023783	2321	2640	+
ENSMMUG00000017457	PIGG	phosphatidylinositol glycan anchor biosynthesis, class G [Source:HGNC Symbol;Acc:HGNC:25985]	ENSMMUT00000024549	1841	2040	+
ENSMMUG00000015800	NOC2L	nucleolar complex associated 2 homolog (S. cerevisiae) [Source:HGNC Symbol;Acc:HGNC:24517]	ENSMMUT00000047680	281	480	+
ENSMMUG00000000838	AGRN	agrin [Source:HGNC Symbol;Acc:HGNC:329]	ENSMMUT00000047676	7081	7208	+
ENSMMUG00000013862	ACAP3	Uncharacterized protein [Source:UniProtKB/TrEMBL;Acc:F6RLI5]	ENSMMUT00000019456	1342	1533	+
ENSMMUG00000013866	CPSF3L	cleavage and polyadenylation specific factor 3-like [Source:HGNC Symbol;Acc:HGNC:26052]	ENSMMUT00000047665	2121	2240	+
ENSMMUG00000006904	CCNL2	cyclin L2 [Source:HGNC Symbol;Acc:HGNC:20570]	ENSMMUT00000009647	2101	2770	+
ENSMMUG00000013280	VWA1	Uncharacterized protein; von Willebrand factor A domain-containing protein 1 isoform 1 [Source:UniProtKB/TrEMBL;Acc:F6Z5F9]	ENSMMUT00000018644	801	1000	+
ENSMMUG00000001549			ENSMMUT00000047660	297	660	+
ENSMMUG00000001551	SSU72	Uncharacterized protein [Source:UniProtKB/TrEMBL;Acc:F7G552]	ENSMMUT00000002192	481	610	+
ENSMMUG00000012961	MIB2	mindbomb E3 ubiquitin protein ligase 2 [Source:HGNC Symbol;Acc:HGNC:30577]	ENSMMUT00000018174	2911	3010	+
ENSMMUG00000001894			ENSMMUT00000047656	901	1040	+
ENSMMUG00000005578	SLC35E2B	solute carrier family 35, member E2B [Source:HGNC Symbol;Acc:HGNC:33941]	ENSMMUT00000047651	1024	1210	+
ENSMMUG00000010879	NADK	NAD kinase [Source:HGNC Symbol;Acc:HGNC:29831]	ENSMMUT00000015215	581	702	+
ENSMMUG00000001896	GNB1	Guanine nucleotide-binding protein G(I)/G(S)/G(T) subunit beta-1; Uncharacterized protein [Source:UniProtKB/TrEMBL;Acc:F7FXA9]	ENSMMUT00000002674	1141	1370	+
ENSMMUG00000012346	RER1	retention in endoplasmic reticulum sorting receptor 1 [Source:HGNC Symbol;Acc:HGNC:30309]	ENSMMUT00000017308	721	874	+
ENSMMUG00000012348	PEX10	peroxisomal biogenesis factor 10 [Source:HGNC Symbol;Acc:HGNC:8851]	ENSMMUT00000017311	51	230	+
ENSMMUG00000014686	PANK4	Pantothenate kinase 4; Uncharacterized protein [Source:UniProtKB/TrEMBL;Acc:F7GTZ5]	ENSMMUT00000020589	2381	2640	+
ENSMMUG00000016329	TNFRSF14	Macaca mulatta tumor necrosis factor receptor superfamily, member 14 (herpesvirus entry mediator) (TNFRSF14), mRNA. [Source:RefSeq mRNA;Acc:NM_001043357]	ENSMMUT00000022931	1191	1376	+
ENSMMUG00000015173	CEP104	centrosomal protein 104kDa [Source:HGNC Symbol;Acc:HGNC:24866]	ENSMMUT00000021276	3011	3120	+
ENSMMUG00000015176	C1orf174	chromosome 1 open reading frame 174 [Source:HGNC Symbol;Acc:HGNC:27915]	ENSMMUT00000021283	501	600	+
ENSMMUG00000016837	KCNAB2	Uncharacterized protein; Voltage-gated potassium channel subunit beta-2 isoform 1 [Source:UniProtKB/TrEMBL;Acc:F7C3Q4]	ENSMMUT00000047625	1121	1240	+
ENSMMUG00000018350	ICMT	isoprenylcysteine carboxyl methyltransferase [Source:HGNC Symbol;Acc:HGNC:5350]	ENSMMUT00000025788	2041	2200	+
ENSMMUG00000004094			ENSMMUT00000005809	1081	1310	+
ENSMMUG00000023681	NOL9	nucleolar protein 9 [Source:HGNC Symbol;Acc:HGNC:26265]	ENSMMUT00000047616	1961	2254	+
ENSMMUG00000032281	ZBTB48	zinc finger and BTB domain containing 48 [Source:HGNC Symbol;Acc:HGNC:4930]	ENSMMUT00000025556	2041	2182	+
ENSMMUG00000009537	PHF13	PHD finger protein 13; Uncharacterized protein [Source:UniProtKB/TrEMBL;Acc:F6YEY8]	ENSMMUT00000013312	1091	1530	+
ENSMMUG00000004686	DNAJC11	Uncharacterized protein [Source:UniProtKB/TrEMBL;Acc:F6RU29]	ENSMMUT00000006619	81	360	+
ENSMMUG00000032279		Uncharacterized protein [Source:UniProtKB/TrEMBL;Acc:F7GDS7]	ENSMMUT00000047611	231	370	+
ENSMMUG00000016546	TNFRSF9	Tumor necrosis factor receptor superfamily member 9; Uncharacterized protein [Source:UniProtKB/TrEMBL;Acc:F6W5G6]	ENSMMUT00000023238	631	760	+
ENSMMUG00000021399	RERE	Arginine-glutamic acid dipeptide repeats protein isoform a; Uncharacterized protein [Source:UniProtKB/TrEMBL;Acc:F7GDT6]	ENSMMUT00000047610	5281	5540	+
ENSMMUG00000016307	SLC2A5	Solute carrier family 2, facilitated glucose transporter member 5 isoform 1; Uncharacterized protein [Source:UniProtKB/TrEMBL;Acc:F7GT75]	ENSMMUT00000022903	1851	2040	+
ENSMMUG00000001958	SLC25A33	solute carrier family 25 (pyrimidine nucleotide carrier), member 33 [Source:HGNC Symbol;Acc:HGNC:29681]	ENSMMUT00000002771	551	730	+
ENSMMUG00000006224	PIK3CD	Uncharacterized protein [Source:UniProtKB/TrEMBL;Acc:F7HLC7]	ENSMMUT00000008706	3021	3180	+
ENSMMUG00000006225	CLSTN1	Calsyntenin-1 isoform 1; Uncharacterized protein [Source:UniProtKB/TrEMBL;Acc:F7HLB8]	ENSMMUT00000008710	3531	3821	+
ENSMMUG00000016296	UBE4B	ubiquitination factor E4B [Source:HGNC Symbol;Acc:HGNC:12500]	ENSMMUT00000022893	4311	4510	+
ENSMMUG00000002171	KIF1B	kinesin family member 1B [Source:HGNC Symbol;Acc:HGNC:16636]	ENSMMUT00000003063	1981	2150	+
ENSMMUG00000032254	DFFA	DNAation factor subunit alpha isoform 2; Uncharacterized protein [Source:UniProtKB/TrEMBL;Acc:F7GIW4]	ENSMMUT00000047581	871	1070	+
ENSMMUG00000007456		Uncharacterized protein [Source:UniProtKB/TrEMBL;Acc:F6SW93]	ENSMMUT00000047578	2461	2647	+
ENSMMUG00000019321	SRM	Spermidine synthase; Uncharacterized protein [Source:UniProtKB/TrEMBL;Acc:F6S2N2]	ENSMMUT00000027131	1071	1271	+
ENSMMUG00000019322	EXOSC10	Uncharacterized protein [Source:UniProtKB/TrEMBL;Acc:F6S2J3]	ENSMMUT00000027134	2281	2525	+
ENSMMUG00000019325	MTOR	mechanistic target of rapamycin (serine/threonine kinase) [Source:HGNC Symbol;Acc:HGNC:3942]	ENSMMUT00000027142	5891	6140	+
ENSMMUG00000032252	UBIAD1	UbiA prenyltransferase domain-containing protein 1; Uncharacterized protein [Source:UniProtKB/TrEMBL;Acc:F7GJ37]	ENSMMUT00000047577	1091	1370	+
ENSMMUG00000004677	AGTRAP	Type-1 angiotensin II receptor-associated protein isoform a; Uncharacterized protein [Source:UniProtKB/TrEMBL;Acc:F6RUB9]	ENSMMUT00000006609	561	880	+
ENSMMUG00000007828	MTHFR	Methylenetetrahydrofolate reductase [Source:UniProtKB/TrEMBL;Acc:F7CI98]	ENSMMUT00000047571	2121	2310	+
ENSMMUG00000007829	CLCN6	Uncharacterized protein [Source:UniProtKB/TrEMBL;Acc:F7CI60]	ENSMMUT00000010966	4841	5000	+
ENSMMUG00000023449	MFN2	mitofusin 2 [Source:HGNC Symbol;Acc:HGNC:16877]	ENSMMUT00000032989	2931	3130	+
ENSMMUG00000008340	TNFRSF8	tumor necrosis factor receptor superfamily, member 8 [Source:HGNC Symbol;Acc:HGNC:11923]	ENSMMUT00000011663	2341	2680	+
ENSMMUG00000021447	TNFRSF1B	Tumor necrosis factor receptor superfamily member 1B; Uncharacterized protein [Source:UniProtKB/TrEMBL;Acc:F7EAE4]	ENSMMUT00000030188	1751	2030	+
ENSMMUG00000032246		Uncharacterized protein [Source:UniProtKB/TrEMBL;Acc:F7GUU4]	ENSMMUT00000047561	1511	1849	+
ENSMMUG00000005681	DHRS3	Short-chain dehydrogenase/reductase 3; Uncharacterized protein [Source:UniProtKB/TrEMBL;Acc:F6U5I2]	ENSMMUT00000007984	1321	1560	+
ENSMMUG00000017040	PRDM2	Uncharacterized protein [Source:UniProtKB/TrEMBL;Acc:F7B9E8]	ENSMMUT00000047558	2971	3090	+
ENSMMUG00000005951	EFHD2	EF-hand domain-containing protein D2; Uncharacterized protein [Source:UniProtKB/TrEMBL;Acc:F6UUX9]	ENSMMUT00000008333	1041	1300	+
ENSMMUG00000018163	CASP9	caspase 9, apoptosis-related cysteine peptidase [Source:HGNC Symbol;Acc:HGNC:1511]	ENSMMUT00000047552	241	360	+
ENSMMUG00000016281	PLEKHM2	pleckstrin homology domain containing, family M (with RUN domain) member 2 [Source:HGNC Symbol;Acc:HGNC:29131]	ENSMMUT00000022871	1471	1760	+
ENSMMUG00000008026	SPEN	spen family transcriptional repressor [Source:HGNC Symbol;Acc:HGNC:17575]	ENSMMUT00000011233	11141	11490	+
ENSMMUG00000008031	ZBTB17	Uncharacterized protein [Source:UniProtKB/TrEMBL;Acc:F7FNS0]	ENSMMUT00000011238	2551	2720	+
ENSMMUG00000012733	FBXO42	F-box only protein 42; Uncharacterized protein [Source:UniProtKB/TrEMBL;Acc:F7ETH8]	ENSMMUT00000017856	2051	2403	+
ENSMMUG00000019940	NECAP2	Uncharacterized protein [Source:UniProtKB/TrEMBL;Acc:F7G079]	ENSMMUT00000028017	841	1200	+
ENSMMUG00000001610	ATP13A2	Uncharacterized protein [Source:UniProtKB/TrEMBL;Acc:F7FP50]	ENSMMUT00000002283	3531	3830	+
ENSMMUG00000001616	PADI2	peptidyl arginine deiminase, type II [Source:HGNC Symbol;Acc:HGNC:18341]	ENSMMUT00000002293	4001	4190	+
ENSMMUG00000006669	UBR4	ubiquitin protein ligase E3 component n-recognin 4 [Source:HGNC Symbol;Acc:HGNC:30313]	ENSMMUT00000009356	14231	14620	+
ENSMMUG00000006688	EMC1	Uncharacterized protein [Source:UniProtKB/TrEMBL;Acc:F7FSE2]	ENSMMUT00000009373	4051	4200	+
ENSMMUG00000006695	MRTO4	Uncharacterized protein; mRNA turnover protein 4 homolog [Source:UniProtKB/TrEMBL;Acc:F7HJV5]	ENSMMUT00000009376	711	987	+
ENSMMUG00000006892	PQLC2	PQ loop repeat containing 2 [Source:HGNC Symbol;Acc:HGNC:26001]	ENSMMUT00000047524	1641	2030	+
ENSMMUG00000006894	CAPZB	capping protein (actin filament) muscle Z-line, beta [Source:HGNC Symbol;Acc:HGNC:1491]	ENSMMUT00000009634	911	1170	+
ENSMMUG00000005855	MINOS1	mitochondrial inner membrane organizing system 1 [Source:HGNC Symbol;Acc:HGNC:32068]	ENSMMUT00000008203	16	160	+
ENSMMUG00000002492	TMCO4	transmembrane and coiled-coil domains 4 [Source:HGNC Symbol;Acc:HGNC:27393]	ENSMMUT00000003546	2621	2810	+
ENSMMUG00000010764	OTUD3	OTU domain-containing protein 3; Uncharacterized protein [Source:UniProtKB/TrEMBL;Acc:F7FUU1]	ENSMMUT00000015046	961	1190	+
ENSMMUG00000008852	HP1BP3	Uncharacterized protein [Source:UniProtKB/TrEMBL;Acc:F7DYV3]	ENSMMUT00000012381	1561	1720	+
ENSMMUG00000004149	EIF4G3	eukaryotic translation initiation factor 4 gamma, 3 [Source:HGNC Symbol;Acc:HGNC:3298]	ENSMMUT00000013999	1271	1501	+
ENSMMUG00000010942	ECE1	endothelin converting enzyme 1 [Source:HGNC Symbol;Acc:HGNC:3146]	ENSMMUT00000015315	2221	2590	+
ENSMMUG00000017344	USP48	ubiquitin specific peptidase 48 [Source:HGNC Symbol;Acc:HGNC:18533]	ENSMMUT00000024395	2031	2130	+
ENSMMUG00000009773	KDM1A	Uncharacterized protein [Source:UniProtKB/TrEMBL;Acc:F6ZH68]	ENSMMUT00000013655	2891	2990	+
ENSMMUG00000011832	E2F2	E2F transcription factor 2 [Source:HGNC Symbol;Acc:HGNC:3114]	ENSMMUT00000016580	4651	4770	+
ENSMMUG00000005560	ID3	DNA-binding protein inhibitor ID-3; Uncharacterized protein [Source:UniProtKB/TrEMBL;Acc:F7GBM3]	ENSMMUT00000007821	651	800	+
ENSMMUG00000003173	TCEB3	transcription elongation factor B (SIII), polypeptide 3 (110kDa, elongin A) [Source:HGNC Symbol;Acc:HGNC:11620]	ENSMMUT00000004493	2201	2360	+
ENSMMUG00000019554	PITHD1	PITH domain-containing protein 1; Uncharacterized protein [Source:UniProtKB/TrEMBL;Acc:F7CKL5]	ENSMMUT00000027463	651	1030	+
ENSMMUG00000019548	HMGCL	Uncharacterized protein [Source:UniProtKB/TrEMBL;Acc:F7CQT4]	ENSMMUT00000027454	1481	1580	+
ENSMMUG00000004216	FUCA1	fucosidase, alpha-L- 1, tissue [Source:HGNC Symbol;Acc:HGNC:4006]	ENSMMUT00000005987	1247	1400	+
ENSMMUG00000013783	PNRC2	proline-rich nuclear receptor coactivator 2 [Source:HGNC Symbol;Acc:HGNC:23158]	ENSMMUT00000019350	271	727	+
ENSMMUG00000004466	NIPAL3	NIPA-like domain containing 3 [Source:HGNC Symbol;Acc:HGNC:25233]	ENSMMUT00000006327	1541	1810	+
ENSMMUG00000002416	CLIC4	Chloride intracellular channel protein 4; Uncharacterized protein [Source:UniProtKB/TrEMBL;Acc:F6PP70]	ENSMMUT00000003434	641	920	+
ENSMMUG00000002420	RUNX3	runt-related transcription factor 3 [Source:HGNC Symbol;Acc:HGNC:10473]	ENSMMUT00000003439	955	1260	+
ENSMMUG00000002970	RSRP1	arginine/serine-rich protein 1 [Source:HGNC Symbol;Acc:HGNC:25234]	ENSMMUT00000004211	851	1076	+
ENSMMUG00000032217	TMEM50A	Transmembrane protein 50A; Uncharacterized protein [Source:UniProtKB/TrEMBL;Acc:F7FZH5]	ENSMMUT00000047485	1881	2130	+
ENSMMUG00000018014	TMEM57	macoilin [Source:RefSeq peptide;Acc:NP_001033739]	ENSMMUT00000025304	851	980	+
ENSMMUG00000023385	LDLRAP1	low density lipoprotein receptor adaptor protein 1 [Source:HGNC Symbol;Acc:HGNC:18640]	ENSMMUT00000032904	1521	1720	+
ENSMMUG00000004788	MAN1C1	mannosidase, alpha, class 1C, member 1 [Source:HGNC Symbol;Acc:HGNC:19080]	ENSMMUT00000006761	1202	1460	+
ENSMMUG00000007854	MTFR1L	mitochondrial fission regulator 1-like [Source:HGNC Symbol;Acc:HGNC:28836]	ENSMMUT00000011001	1461	1620	+
ENSMMUG00000016874	PDIK1L	PDLIM1 interacting kinase 1 like [Source:HGNC Symbol;Acc:HGNC:18981]	ENSMMUT00000047477	471	670	+
ENSMMUG00000004682	ZNF593	Uncharacterized protein; Zinc finger protein 593 [Source:UniProtKB/TrEMBL;Acc:F6RU82]	ENSMMUT00000006614	416	620	+
ENSMMUG00000000644	CEP85	Centrosomal protein of 85 kDa; Uncharacterized protein [Source:UniProtKB/TrEMBL;Acc:F6XS40]	ENSMMUT00000000928	2211	2550	+
ENSMMUG00000000646	SH3BGRL3	Uncharacterized protein [Source:UniProtKB/TrEMBL;Acc:F6XR95]	ENSMMUT00000000932	1261	1442	+
ENSMMUG00000022111	RPS6KA1	ribosomal protein S6 kinase, 90kDa, polypeptide 1 [Source:HGNC Symbol;Acc:HGNC:10430]	ENSMMUT00000031109	2961	3154	+
ENSMMUG00000012697	ARID1A	Uncharacterized protein [Source:UniProtKB/TrEMBL;Acc:F7DX46]	ENSMMUT00000017806	6391	6630	+
ENSMMUG00000013856	ZDHHC18	zinc finger, DHHC-type containing 18 [Source:HGNC Symbol;Acc:HGNC:20712]	ENSMMUT00000019446	851	1090	+
ENSMMUG00000016893	SLC9A1	Sodium/hydrogen exchanger [Source:UniProtKB/TrEMBL;Acc:F7CQM0]	ENSMMUT00000023727	421	580	+
ENSMMUG00000004762	WDTC1	Uncharacterized protein; WD and tetratricopeptide repeats protein 1 [Source:UniProtKB/TrEMBL;Acc:F6SM88]	ENSMMUT00000006729	2291	2510	+
ENSMMUG00000004767	TMEM222	Uncharacterized protein [Source:UniProtKB/TrEMBL;Acc:F6SM64]	ENSMMUT00000047451	586	910	+
ENSMMUG00000004768	SYTL1	synaptotagmin-like 1 [Source:HGNC Symbol;Acc:HGNC:15584]	ENSMMUT00000006734	451	640	+
ENSMMUG00000018221	WASF2	WAS protein family, member 2 [Source:HGNC Symbol;Acc:HGNC:12733]	ENSMMUT00000025610	501	690	+
ENSMMUG00000014434	FGR	Tyrosine-protein kinase Fgr; Uncharacterized protein [Source:UniProtKB/TrEMBL;Acc:F7BHF8]	ENSMMUT00000020255	1841	2110	+
ENSMMUG00000011454	2015-06-16	Macaca mulatta 6-16 protein-like (6-16), mRNA. [Source:RefSeq mRNA;Acc:NM_001048170]	ENSMMUT00000016036	641	810	+
ENSMMUG00000012252	STX12	Uncharacterized protein [Source:UniProtKB/TrEMBL;Acc:F6V089]	ENSMMUT00000047443	401	570	+
ENSMMUG00000006933	PPP1R8	Uncharacterized protein [Source:UniProtKB/TrEMBL;Acc:F7E1S7]	ENSMMUT00000032572	661	1063	+
ENSMMUG00000018172	RPA2	Replication protein A 32 kDa subunit; Uncharacterized protein [Source:UniProtKB/TrEMBL;Acc:F7EYD7]	ENSMMUT00000025541	571	680	+
ENSMMUG00000017080	DNAJC8	DnaJ homolog subfamily C member 8; Uncharacterized protein [Source:UniProtKB/TrEMBL;Acc:F7HJB1]	ENSMMUT00000024014	611	720	+
ENSMMUG00000019993	SESN2	Sestrin-2; Uncharacterized protein [Source:UniProtKB/TrEMBL;Acc:F7FNU6]	ENSMMUT00000028099	1831	2160	+
ENSMMUG00000018338		Uncharacterized protein [Source:UniProtKB/TrEMBL;Acc:F7H672]	ENSMMUT00000025772	721	820	+
ENSMMUG00000006561	TRNAU1AP	tRNA selenocysteine 1 associated protein 1 [Source:HGNC Symbol;Acc:HGNC:30813]	ENSMMUT00000009190	591	720	+
ENSMMUG00000011391	YTHDF2	Uncharacterized protein [Source:UniProtKB/TrEMBL;Acc:F6W6I0]	ENSMMUT00000047434	1091	1280	+
ENSMMUG00000011377	EPB41	erythrocyte membrane protein band 4.1 [Source:HGNC Symbol;Acc:HGNC:3377]	ENSMMUT00000015930	1511	1640	+
ENSMMUG00000007110	SRSF4	Serine/arginine-rich splicing factor 4; Uncharacterized protein [Source:UniProtKB/TrEMBL;Acc:F7DYE3]	ENSMMUT00000009922	821	970	+
ENSMMUG00000015659	MECR	Trans-2-enoyl-CoA reductase, mitochondrial isoform a; Uncharacterized protein [Source:UniProtKB/TrEMBL;Acc:F6RDJ9]	ENSMMUT00000021963	1631	2050	+
ENSMMUG00000008744	LAPTM5	lysosomal protein transmembrane 5 [Source:HGNC Symbol;Acc:HGNC:29612]	ENSMMUT00000012216	1	110	+
ENSMMUG00000013520	PUM1	Pumilio homolog 1 isoform 1; Uncharacterized protein [Source:UniProtKB/TrEMBL;Acc:F6Z785]	ENSMMUT00000018986	4021	4180	+
ENSMMUG00000019406	SNRNP40	U5 small nuclear ribonucleoprotein 40 kDa protein; Uncharacterized protein [Source:UniProtKB/TrEMBL;Acc:F6SV59]	ENSMMUT00000027255	1241	1410	+
ENSMMUG00000023397		Uncharacterized protein [Source:UniProtKB/TrEMBL;Acc:F7FE57]	ENSMMUT00000032920	871	1140	+
ENSMMUG00000023398	COL16A1	collagen, type XVI, alpha 1 [Source:HGNC Symbol;Acc:HGNC:2193]	ENSMMUT00000032923	4901	5068	+
ENSMMUG00000012930	PTP4A2	protein tyrosine phosphatase type IVA, member 2 [Source:HGNC Symbol;Acc:HGNC:9635]	ENSMMUT00000018132	401	649	+
ENSMMUG00000015650	TMEM39B	Transmembrane protein 39B; Uncharacterized protein [Source:UniProtKB/TrEMBL;Acc:F6RKY8]	ENSMMUT00000021954	1501	1784	+
ENSMMUG00000008455	KPNA6	Uncharacterized protein [Source:UniProtKB/TrEMBL;Acc:F6UVJ8]	ENSMMUT00000047421	1681	2060	+
ENSMMUG00000008453	TMEM234	transmembrane protein 234 [Source:HGNC Symbol;Acc:HGNC:28837]	ENSMMUT00000047418	1011	1248	+
ENSMMUG00000006119	EIF3I	eukaryotic translation initiation factor 3, subunit I [Source:HGNC Symbol;Acc:HGNC:3272]	ENSMMUT00000008556	1	110	+
ENSMMUG00000009948	HDAC1	Histone deacetylase [Source:UniProtKB/TrEMBL;Acc:F6RIU8]	ENSMMUT00000013891	1741	1856	+
ENSMMUG00000001264	BSDC1	Uncharacterized protein [Source:UniProtKB/TrEMBL;Acc:F7CXY4]	ENSMMUT00000047415	931	1173	+
ENSMMUG00000009940	RBBP4	Histone-binding protein RBBP4 isoform a; Uncharacterized protein [Source:UniProtKB/TrEMBL;Acc:F6RJL6]	ENSMMUT00000013878	31	210	+
ENSMMUG00000019746	YARS	tyrosyl-tRNA synthetase [Source:HGNC Symbol;Acc:HGNC:12840]	ENSMMUT00000027750	1641	1810	+
ENSMMUG00000000308	S100PBP	S100P-binding protein isoform a; Uncharacterized protein [Source:UniProtKB/TrEMBL;Acc:F6YVA3]	ENSMMUT00000000446	631	800	+
ENSMMUG00000003267	ZNF362	Uncharacterized protein; Zinc finger protein 362 [Source:UniProtKB/TrEMBL;Acc:F7DIM6]	ENSMMUT00000004621	1651	1870	+
ENSMMUG00000003269	PHC2	Uncharacterized protein [Source:UniProtKB/TrEMBL;Acc:F7DIK0]	ENSMMUT00000004629	2543	2850	+
ENSMMUG00000019154	SFPQ	splicing factor proline/glutamine-rich [Source:HGNC Symbol;Acc:HGNC:10774]	ENSMMUT00000026910	1	110	+
ENSMMUG00000019793	ZMYM4	Uncharacterized protein [Source:UniProtKB/TrEMBL;Acc:F7G1U3]	ENSMMUT00000027829	4921	5150	+
ENSMMUG00000019812	NCDN	Neurochondrin isoform 1; Uncharacterized protein [Source:UniProtKB/TrEMBL;Acc:F7G1A2]	ENSMMUT00000027841	1131	1260	+
ENSMMUG00000013090	PSMB2	Proteasome subunit beta type [Source:UniProtKB/TrEMBL;Acc:F6XJL9]	ENSMMUT00000018360	651	770	+
ENSMMUG00000006251	AGO1	argonaute RISC catalytic component 1 [Source:HGNC Symbol;Acc:HGNC:3262]	ENSMMUT00000008747	5861	6040	+
ENSMMUG00000012030	ADPRHL2	Uncharacterized protein [Source:UniProtKB/TrEMBL;Acc:F7GRS8]	ENSMMUT00000016849	901	1020	+
ENSMMUG00000022499	TRAPPC3	Trafficking protein particle complex subunit 3; Uncharacterized protein [Source:UniProtKB/TrEMBL;Acc:F7A3R2]	ENSMMUT00000031638	641	847	+
ENSMMUG00000016212	STK40	serine/threonine kinase 40 [Source:HGNC Symbol;Acc:HGNC:21373]	ENSMMUT00000022778	1500	1724	+
ENSMMUG00000010323	ZC3H12A	Uncharacterized protein [Source:UniProtKB/TrEMBL;Acc:F6RGY4]	ENSMMUT00000014442	1191	1440	+
ENSMMUG00000008421	SNIP1	Smad nuclear-interacting protein 1; Uncharacterized protein [Source:UniProtKB/TrEMBL;Acc:F6VCH4]	ENSMMUT00000011771	1111	1330	+
ENSMMUG00000005372	YRDC	YrdC domain-containing protein, mitochondrial [Source:UniProtKB/TrEMBL;Acc:H9F8J3]	ENSMMUT00000007561	1161	1320	+
ENSMMUG00000023634	RRAGC	Uncharacterized protein [Source:UniProtKB/TrEMBL;Acc:F7H1S0]	ENSMMUT00000033247	1431	1870	+
ENSMMUG00000009562		Uncharacterized protein [Source:UniProtKB/TrEMBL;Acc:F6X516]	ENSMMUT00000013356	4551	4670	+
ENSMMUG00000007497	PABPC4	Polyadenylate-binding protein 4 isoform 3; Uncharacterized protein [Source:UniProtKB/TrEMBL;Acc:F6QKA5]	ENSMMUT00000010491	1431	1810	+
ENSMMUG00000018869	PPIE	Peptidyl-prolyl cis-trans isomerase [Source:UniProtKB/TrEMBL;Acc:F6WZW1]	ENSMMUT00000026526	1051	1230	+
ENSMMUG00000009188	CAP1	Adenylyl cyclase-associated protein [Source:UniProtKB/TrEMBL;Acc:F7FR05]	ENSMMUT00000012844	831	1170	+
ENSMMUG00000009189	PPT1	Uncharacterized protein [Source:UniProtKB/TrEMBL;Acc:F7HMC2]	ENSMMUT00000012845	42	200	+
ENSMMUG00000005992	ZMPSTE24	CAAX prenyl protease 1 homolog; Uncharacterized protein [Source:UniProtKB/TrEMBL;Acc:F6UEH3]	ENSMMUT00000008382	1351	1590	+
ENSMMUG00000013839	SMAP2	Stromal membrane-associated protein 2 isoform 1; Uncharacterized protein [Source:UniProtKB/TrEMBL;Acc:F6SYR6]	ENSMMUT00000019423	1201	1390	+
ENSMMUG00000017101	CTPS	CTP synthase [Source:UniProtKB/TrEMBL;Acc:F7H5B5]	ENSMMUT00000024045	2231	2470	+
ENSMMUG00000016215	HIVEP3	Uncharacterized protein [Source:UniProtKB/TrEMBL;Acc:F7FTZ7]	ENSMMUT00000022785	7581	7780	+
ENSMMUG00000013653	KDM5A	lysine (K)-specific demethylase 5A [Source:HGNC Symbol;Acc:HGNC:9886]	ENSMMUT00000047342	4571	4780	+
ENSMMUG00000013894	B4GALNT3	beta-1,4-N-acetyl-galactosaminyl transferase 3 [Source:HGNC Symbol;Acc:HGNC:24137]	ENSMMUT00000047341	1751	1930	+
ENSMMUG00000018650	WNK1	WNK lysine deficient protein kinase 1 [Source:HGNC Symbol;Acc:HGNC:14540]	ENSMMUT00000014449	6321	6690	+
ENSMMUG00000022381	LEPRE1	leucine proline-enriched proteoglycan (leprecan) 1 [Source:HGNC Symbol;Acc:HGNC:19316]	ENSMMUT00000031482	2661	2938	+
ENSMMUG00000017262	ADIPOR2	Adiponectin receptor protein 2; Progestin and adipoQ receptor family member II; Uncharacterized protein [Source:UniProtKB/TrEMBL;Acc:F7GWW1]	ENSMMUT00000024271	3281	3380	+
ENSMMUG00000016111	C1H1ORF50	Uncharacterized protein; Uncharacterized protein C1orf50 [Source:UniProtKB/TrEMBL;Acc:F7GIR8]	ENSMMUT00000022655	521	710	+
ENSMMUG00000000373	SLC2A1	Solute carrier family 2, facilitated glucose transporter member 1; Uncharacterized protein [Source:UniProtKB/TrEMBL;Acc:F6YFI2]	ENSMMUT00000000538	2001	2240	+
ENSMMUG00000010660	TIE1	Uncharacterized protein [Source:UniProtKB/TrEMBL;Acc:F7B4Q3]	ENSMMUT00000014912	3566	3740	+
ENSMMUG00000003149	CDC20	Cell division cycle protein 20 homolog; Uncharacterized protein [Source:UniProtKB/TrEMBL;Acc:F7FUI4]	ENSMMUT00000047334	1631	1752	+
ENSMMUG00000007405	FKBP4	FK506 binding protein 4, 59kDa [Source:HGNC Symbol;Acc:HGNC:3720]	ENSMMUT00000010356	881	1030	+
ENSMMUG00000007411	ITFG2	integrin alpha FG-GAP repeat containing 2 [Source:HGNC Symbol;Acc:HGNC:30879]	ENSMMUT00000010371	791	890	+
ENSMMUG00000004172	TULP3	tubby like protein 3 [Source:HGNC Symbol;Acc:HGNC:12425]	ENSMMUT00000047333	1311	1820	+
ENSMMUG00000003152	ELOVL1	Elongation of very long chain fatty acids protein 1; Uncharacterized protein [Source:UniProtKB/TrEMBL;Acc:F7FUS0]	ENSMMUT00000004468	941	1210	+
ENSMMUG00000023671	MED8	mediator complex subunit 8 [Source:HGNC Symbol;Acc:HGNC:19971]	ENSMMUT00000033305	571	800	+
ENSMMUG00000023674	C1ORF84	Uncharacterized protein [Source:UniProtKB/TrEMBL;Acc:F7FUT6]	ENSMMUT00000033310	7501	8292	+
ENSMMUG00000018273	PARP11	Poly [ADP-ribose] polymerase 11; Uncharacterized protein [Source:UniProtKB/TrEMBL;Acc:F7HM89]	ENSMMUT00000025675	921	1140	+
ENSMMUG00000008546	CCND2	cyclin D2 [Source:HGNC Symbol;Acc:HGNC:1583]	ENSMMUT00000011951	701	860	+
ENSMMUG00000008548	C12orf5	chromosome 12 open reading frame 5 [Source:HGNC Symbol;Acc:HGNC:1185]	ENSMMUT00000011952	691	850	+
ENSMMUG00000023675	HYI	hydroxypyruvate isomerase (putative) [Source:HGNC Symbol;Acc:HGNC:26948]	ENSMMUT00000033319	921	1040	+
ENSMMUG00000020813		Uncharacterized protein [Source:UniProtKB/TrEMBL;Acc:F7H7P1]	ENSMMUT00000029283	1091	1250	+
ENSMMUG00000012479	KDM4A	lysine (K)-specific demethylase 4A [Source:HGNC Symbol;Acc:HGNC:22978]	ENSMMUT00000017497	2981	3180	+
ENSMMUG00000015555	ST3GAL3	Uncharacterized protein [Source:UniProtKB/TrEMBL;Acc:F6Q803]	ENSMMUT00000047317	2081	2310	+
ENSMMUG00000014266	TAPBPL	Tapasin-related protein; Uncharacterized protein [Source:UniProtKB/TrEMBL;Acc:F7BYR4]	ENSMMUT00000047319	1521	1680	+
ENSMMUG00000000377	TNFRSF1A	tumor necrosis factor receptor superfamily, member 1A [Source:HGNC Symbol;Acc:HGNC:11916]	ENSMMUT00000000541	1231	1330	+
ENSMMUG00000014265	CD27	CD27L receptor; Uncharacterized protein [Source:UniProtKB/TrEMBL;Acc:F7BYS2]	ENSMMUT00000020014	1181	1296	+
ENSMMUG00000014262	VAMP1	Uncharacterized protein; Vesicle-associated membrane protein 1 isoform 2 [Source:UniProtKB/TrEMBL;Acc:F7BYS8]	ENSMMUT00000020013	233	380	+
ENSMMUG00000018677	NCAPD2	Condensin complex subunit 1 [Source:UniProtKB/TrEMBL;Acc:F6ZY62]	ENSMMUT00000026258	4061	4350	+
ENSMMUG00000015142	IPO13	Uncharacterized protein [Source:UniProtKB/TrEMBL;Acc:F6UE53]	ENSMMUT00000021235	2941	3060	+
ENSMMUG00000018679	GAPDH	Glyceraldehyde-3-phosphate dehydrogenase; Uncharacterized protein [Source:UniProtKB/TrEMBL;Acc:F6WJJ6]	ENSMMUT00000008204	1161	1340	+
ENSMMUG00000015150	DPH2	DPH2 homolog (S. cerevisiae) [Source:HGNC Symbol;Acc:HGNC:3004]	ENSMMUT00000021242	1491	1707	+
ENSMMUG00000018681	IFFO1	intermediate filament family orphan 1 [Source:HGNC Symbol;Acc:HGNC:24970]	ENSMMUT00000026264	1671	1790	+
ENSMMUG00000015154	ATP6V0B	Uncharacterized protein; V-type proton ATPase 21 kDa proteolipid subunit isoform 1 [Source:UniProtKB/TrEMBL;Acc:F6UDI5]	ENSMMUT00000047311	1641	1740	+
ENSMMUG00000018683	NOP2	NOP2 nucleolar protein [Source:HGNC Symbol;Acc:HGNC:7867]	ENSMMUT00000026269	2311	2430	+
ENSMMUG00000018685	CHD4	chromodomain helicase DNA binding protein 4 [Source:HGNC Symbol;Acc:HGNC:1919]	ENSMMUT00000026275	4741	5270	+
ENSMMUG00000015158	SLC6A9	Transporter [Source:UniProtKB/TrEMBL;Acc:F6UD64]	ENSMMUT00000021254	2011	2110	+
ENSMMUG00000011645	DMAP1	Uncharacterized protein [Source:UniProtKB/TrEMBL;Acc:F6PT62]	ENSMMUT00000047308	951	1190	+
ENSMMUG00000011651	ERI3	ERI1 exoribonuclease 3; Uncharacterized protein [Source:UniProtKB/TrEMBL;Acc:F6PT31]	ENSMMUT00000047305	1602	1750	+
ENSMMUG00000016990	ZNF384	Uncharacterized protein [Source:UniProtKB/TrEMBL;Acc:F6PRQ4]	ENSMMUT00000023877	1011	1160	+
ENSMMUG00000009583	COPS7A	Uncharacterized protein [Source:UniProtKB/TrEMBL;Acc:F7G169]	ENSMMUT00000047301	911	1050	+
ENSMMUG00000012206	MLF2	Myelodysplasia-myeloid leukemia factor 2; Myeloid leukemia factor 2; Uncharacterized protein [Source:UniProtKB/TrEMBL;Acc:F6VND2]	ENSMMUT00000017095	1371	1520	+
ENSMMUG00000021929	KIF2C	Uncharacterized protein [Source:UniProtKB/TrEMBL;Acc:F6T486]	ENSMMUT00000047297	441	630	+
ENSMMUG00000005192	USP5	Ubiquitin carboxyl-terminal hydrolase [Source:UniProtKB/TrEMBL;Acc:F7CT78]	ENSMMUT00000007312	3031	3150	+
ENSMMUG00000009443	ENO2	Gamma-enolase; Uncharacterized protein [Source:UniProtKB/TrEMBL;Acc:F6X1V9]	ENSMMUT00000047285	2701	2830	+
ENSMMUG00000010203	PTPN6	protein tyrosine phosphatase, non-receptor type 6 [Source:HGNC Symbol;Acc:HGNC:9658]	ENSMMUT00000014246	1763	1930	+
ENSMMUG00000012993	HECTD3	E3 ubiquitin-protein ligase HECTD3; Uncharacterized protein [Source:UniProtKB/TrEMBL;Acc:F7HR90]	ENSMMUT00000018229	3051	3500	+
ENSMMUG00000010205	PHB2	prohibitin 2 [Source:HGNC Symbol;Acc:HGNC:30306]	ENSMMUT00000047281	801	960	+
ENSMMUG00000010207	EMG1	Nucleolar protein EMG1-like protein; Ribosomal RNA small subunit methyltransferase NEP1; Uncharacterized protein [Source:UniProtKB/TrEMBL;Acc:F6SII9]	ENSMMUT00000014251	736	918	+
ENSMMUG00000020079	MUTYH	Uncharacterized protein [Source:UniProtKB/TrEMBL;Acc:F7G5B4]	ENSMMUT00000028242	371	540	+
ENSMMUG00000006470	C1R	complement component 1, r subcomponent [Source:HGNC Symbol;Acc:HGNC:1246]	ENSMMUT00000012440	1781	2010	+
ENSMMUG00000008899	CLSTN3	Alcadein-beta; Calsyntenin-3; Uncharacterized protein [Source:UniProtKB/TrEMBL;Acc:F7DNG4]	ENSMMUT00000047276	3361	3580	+
ENSMMUG00000004242	PEX5	peroxisomal biogenesis factor 5 [Source:HGNC Symbol;Acc:HGNC:9719]	ENSMMUT00000006018	2941	3095	+
ENSMMUG00000019613	EHMT1	euchromatic histone-lysine N-methyltransferase 1 [Source:HGNC Symbol;Acc:HGNC:24650]	ENSMMUT00000027540	551	790	+
ENSMMUG00000020081	TOE1	Uncharacterized protein [Source:UniProtKB/TrEMBL;Acc:F7GPC3]	ENSMMUT00000028245	1521	1860	+
ENSMMUG00000019610	ZMYND19	Uncharacterized protein; Zinc finger MYND domain-containing protein 19 [Source:UniProtKB/TrEMBL;Acc:F7B823]	ENSMMUT00000027535	871	1130	+
ENSMMUG00000019609	WDR85	Uncharacterized protein [Source:UniProtKB/TrEMBL;Acc:F7B834]	ENSMMUT00000027533	1181	1350	+
ENSMMUG00000006221	PRDX1	Peroxiredoxin-1; Uncharacterized protein [Source:UniProtKB/TrEMBL;Acc:F7HLH7]	ENSMMUT00000008701	801	910	+
ENSMMUG00000019607	PNPLA7	Uncharacterized protein [Source:UniProtKB/TrEMBL;Acc:F7B8I9]	ENSMMUT00000027531	4151	4390	+
ENSMMUG00000000439	SLC2A3	Solute carrier family 2, facilitated glucose transporter member 3; Uncharacterized protein [Source:UniProtKB/TrEMBL;Acc:F7A5T7]	ENSMMUT00000047265	2408	2533	+
ENSMMUG00000019605	NELF	Uncharacterized protein [Source:UniProtKB/TrEMBL;Acc:F7B8J7]	ENSMMUT00000047251	1801	2040	+
ENSMMUG00000015253	NECAP1	Adaptin ear-binding coat-associated protein 1; NECAP endocytosis-associated protein 1; Uncharacterized protein [Source:UniProtKB/TrEMBL;Acc:F7DZS2]	ENSMMUT00000021386	831	1000	+
ENSMMUG00000001960	GPBP1L1	Uncharacterized protein; Vasculin-like protein 1 [Source:UniProtKB/TrEMBL;Acc:F6VH41]	ENSMMUT00000002774	2071	2280	+
ENSMMUG00000001831	IPP	Uncharacterized protein [Source:UniProtKB/TrEMBL;Acc:F7GS48]	ENSMMUT00000002576	1721	2010	+
ENSMMUG00000015371	MAST2	microtubule associated serine/threonine kinase 2 [Source:HGNC Symbol;Acc:HGNC:19035]	ENSMMUT00000021572	5511	5718	+
ENSMMUG00000015080	PIK3R3	Uncharacterized protein [Source:UniProtKB/TrEMBL;Acc:F6WVD4]	ENSMMUT00000047240	1151	1260	+
ENSMMUG00000015078	POMGNT1	Protein O-linked-mannose beta-1,2-N-acetylglucosaminyltransferase 1; Uncharacterized protein [Source:UniProtKB/TrEMBL;Acc:F6WVH8]	ENSMMUT00000047232	3251	3440	+
ENSMMUG00000017846	M6PR	Cation-dependent mannose-6-phosphate receptor; Cation-dependent mannose-6-phosphate receptor isoform 1; Uncharacterized protein [Source:UniProtKB/TrEMBL;Acc:F7DKQ6]	ENSMMUT00000025082	2061	2318	+
ENSMMUG00000018107	NDOR1	NADPH dependent diflavin oxidoreductase 1 [Source:HGNC Symbol;Acc:HGNC:29838]	ENSMMUT00000025440	1891	2122	+
ENSMMUG00000005838	LURAP1	NF-kappa-B activator C1orf190; Uncharacterized protein [Source:UniProtKB/TrEMBL;Acc:F6VDA3]	ENSMMUT00000008182	421	740	+
ENSMMUG00000018105			ENSMMUT00000025434	61	190	+
ENSMMUG00000001673	SSNA1	Sjoegren syndrome nuclear autoantigen 1; Uncharacterized protein [Source:UniProtKB/TrEMBL;Acc:F7G3I8]	ENSMMUT00000002371	61	270	+
ENSMMUG00000001669	ANAPC2	Anaphase-promoting complex subunit 2; Uncharacterized protein [Source:UniProtKB/TrEMBL;Acc:F7G3J3]	ENSMMUT00000002370	2461	2620	+
ENSMMUG00000022864	DDX11	DEAD/H (Asp-Glu-Ala-Asp/His) box helicase 11 [Source:HGNC Symbol;Acc:HGNC:2736]	ENSMMUT00000032187	3461	3660	+
ENSMMUG00000008036	MAN1B1	mannosidase, alpha, class 1B, member 1 [Source:HGNC Symbol;Acc:HGNC:6823]	ENSMMUT00000047220	2491	2730	+
ENSMMUG00000004863	ATPAF1	Uncharacterized protein [Source:UniProtKB/TrEMBL;Acc:F7AVF1]	ENSMMUT00000006871	1608	1750	+
ENSMMUG00000004866		Uncharacterized protein [Source:UniProtKB/TrEMBL;Acc:F7AV87]	ENSMMUT00000047214	461	600	+
ENSMMUG00000015293	CLEC2D	C-type lectin domain family 2, member D [Source:HGNC Symbol;Acc:HGNC:14351]	ENSMMUT00000021444	1	120	+
ENSMMUG00000015297	CD69	Uncharacterized protein [Source:UniProtKB/TrEMBL;Acc:F6QEG7]	ENSMMUT00000021448	831	1020	+
ENSMMUG00000017375	CMPK1	Uncharacterized protein [Source:UniProtKB/TrEMBL;Acc:F7GRA8]	ENSMMUT00000024433	100	406	+
ENSMMUG00000011528	FBXW5	Uncharacterized protein [Source:UniProtKB/TrEMBL;Acc:F7C048]	ENSMMUT00000016147	671	890	+
ENSMMUG00000011527	TRAF2	TNF receptor-associated factor 2; Uncharacterized protein [Source:UniProtKB/TrEMBL;Acc:F7C057]	ENSMMUT00000016145	1851	1990	+
ENSMMUG00000005042	RABL6	Uncharacterized protein [Source:UniProtKB/TrEMBL;Acc:F7AJN9]	ENSMMUT00000047189	2071	2336	+
ENSMMUG00000019056	FAF1	Uncharacterized protein [Source:UniProtKB/TrEMBL;Acc:F6QTM2]	ENSMMUT00000026774	1901	2200	+
ENSMMUG00000019057	CDKN2C	Cyclin-dependent kinase 4 inhibitor C; Uncharacterized protein [Source:UniProtKB/TrEMBL;Acc:F6QTJ3]	ENSMMUT00000026777	2131	2310	+
ENSMMUG00000012112	RNF11	RING finger protein 11; Uncharacterized protein [Source:UniProtKB/TrEMBL;Acc:F7H8S3]	ENSMMUT00000016957	25	779	+
ENSMMUG00000012055	EPS15	epidermal growth factor receptor pathway substrate 15 [Source:HGNC Symbol;Acc:HGNC:3419]	ENSMMUT00000016881	2481	2660	+
ENSMMUG00000019282		Uncharacterized protein [Source:UniProtKB/TrEMBL;Acc:F6SBG9]	ENSMMUT00000027084	95	222	+
ENSMMUG00000004735	OSBPL9	oxysterol binding protein-like 9 [Source:HGNC Symbol;Acc:HGNC:16386]	ENSMMUT00000006691	1941	2050	+
ENSMMUG00000017022	NOTCH1	Uncharacterized protein [Source:UniProtKB/TrEMBL;Acc:F6Y5M4]	ENSMMUT00000023931	7281	7610	+
ENSMMUG00000004738	NRD1	Uncharacterized protein [Source:UniProtKB/TrEMBL;Acc:F6SU75]	ENSMMUT00000006703	3231	3340	+
ENSMMUG00000018578	LOH12CR1	Uncharacterized protein [Source:UniProtKB/TrEMBL;Acc:F6YFS9]	ENSMMUT00000026112	951	1144	+
ENSMMUG00000003636		Uncharacterized protein [Source:UniProtKB/TrEMBL;Acc:F6Q5X6]	ENSMMUT00000005151	381	583	+
ENSMMUG00000022370	CDKN1B	Cyclin-dependent kinase inhibitor 1B; Uncharacterized protein [Source:UniProtKB/TrEMBL;Acc:F6Z4R0]	ENSMMUT00000031466	391	940	+
ENSMMUG00000014329	CC2D1B	coiled-coil and C2 domain containing 1B [Source:HGNC Symbol;Acc:HGNC:29386]	ENSMMUT00000020104	2581	2750	+
ENSMMUG00000017993	DDX47	DEAD (Asp-Glu-Ala-Asp) box polypeptide 47 [Source:HGNC Symbol;Acc:HGNC:18682]	ENSMMUT00000025281	1771	2143	+
ENSMMUG00000003106	SEC16A	SEC16 homolog A (S. cerevisiae) [Source:HGNC Symbol;Acc:HGNC:29006]	ENSMMUT00000004405	5701	5950	+
ENSMMUG00000014330	ORC1	Uncharacterized protein [Source:UniProtKB/TrEMBL;Acc:F7CZ60]	ENSMMUT00000020110	941	1283	+
ENSMMUG00000014333	PRPF38A	pre-mRNA processing factor 38A [Source:HGNC Symbol;Acc:HGNC:25930]	ENSMMUT00000020113	2021	2180	+
ENSMMUG00000017023	ZCCHC11	zinc finger, CCHC domain containing 11 [Source:HGNC Symbol;Acc:HGNC:28981]	ENSMMUT00000023933	2261	2490	+
ENSMMUG00000003105	INPP5E	inositol polyphosphate-5-phosphatase, 72 kDa [Source:HGNC Symbol;Acc:HGNC:21474]	ENSMMUT00000004393	211	360	+
ENSMMUG00000003098	PMPCA	Mitochondrial-processing peptidase subunit alpha; Uncharacterized protein [Source:UniProtKB/TrEMBL;Acc:F7DRX8]	ENSMMUT00000004388	1901	2088	+
ENSMMUG00000003086	SNAPC4	small nuclear RNA activating complex, polypeptide 4, 190kDa [Source:HGNC Symbol;Acc:HGNC:11137]	ENSMMUT00000004369	3311	3860	+
ENSMMUG00000003664	ATF7IP	Activating transcription factor 7-interacting protein 1; Uncharacterized protein [Source:UniProtKB/TrEMBL;Acc:F6TC80]	ENSMMUT00000017779	3661	3830	+
ENSMMUG00000032120		Peptidyl-prolyl cis-trans isomerase [Source:UniProtKB/TrEMBL;Acc:F6YD24]	ENSMMUT00000047155	384	490	+
ENSMMUG00000032119	HIST1H4K	Histone H4 [Source:UniProtKB/TrEMBL;Acc:F7HAP8]	ENSMMUT00000047152	1	150	+
ENSMMUG00000019299	WBP11	Uncharacterized protein; WW domain-binding protein 11 [Source:UniProtKB/TrEMBL;Acc:F6S9X4]	ENSMMUT00000027106	371	480	+
ENSMMUG00000016827	UBAC1	UBA domain containing 1 [Source:HGNC Symbol;Acc:HGNC:30221]	ENSMMUT00000023643	1281	1450	+
ENSMMUG00000016246	CHMP2B	Charged multivesicular body protein 2b; Uncharacterized protein [Source:UniProtKB/TrEMBL;Acc:F7GEL2]	ENSMMUT00000022826	221	722	+
ENSMMUG00000007606	CPT2	Carnitine O-palmitoyltransferase 2, mitochondrial; Uncharacterized protein [Source:UniProtKB/TrEMBL;Acc:F6SJN6]	ENSMMUT00000010644	941	1132	+
ENSMMUG00000018032	ARHGDIB	Uncharacterized protein [Source:UniProtKB/TrEMBL;Acc:F7FJ95]	ENSMMUT00000025324	1	110	+
ENSMMUG00000005239	CGGBP1	CGG triplet repeat-binding protein 1; Uncharacterized protein [Source:UniProtKB/TrEMBL;Acc:F7BWR7]	ENSMMUT00000047137	691	830	+
ENSMMUG00000021507	C2H3ORF38	Uncharacterized protein [Source:UniProtKB/TrEMBL;Acc:F7FFW4]	ENSMMUT00000030275	991	1230	+
ENSMMUG00000020334	PROS1	Macaca mulatta protein S (alpha) (PROS1), mRNA. [Source:RefSeq mRNA;Acc:NM_001044726]	ENSMMUT00000028602	2591	2820	+
ENSMMUG00000003546		Uncharacterized protein [Source:UniProtKB/TrEMBL;Acc:F7EXN3]	ENSMMUT00000005015	390	650	+
ENSMMUG00000001413	YIPF1	Yip1 domain family, member 1 [Source:HGNC Symbol;Acc:HGNC:25231]	ENSMMUT00000047118	1351	1800	+
ENSMMUG00000009549	CLDND1	Uncharacterized protein [Source:UniProtKB/TrEMBL;Acc:F6Y8C4]	ENSMMUT00000013325	1011	1210	+
ENSMMUG00000010833	CPOX	coproporphyrinogen oxidase [Source:HGNC Symbol;Acc:HGNC:2321]	ENSMMUT00000015150	1301	1500	+
ENSMMUG00000008183	RXRA	retinoid X receptor, alpha [Source:HGNC Symbol;Acc:HGNC:10477]	ENSMMUT00000011436	521	729	+
ENSMMUG00000007183	TMEM59	Transmembrane protein 59; Uncharacterized protein [Source:UniProtKB/TrEMBL;Acc:F6YT92]	ENSMMUT00000047102	227	380	+
ENSMMUG00000014159		Uncharacterized protein; WD repeat-containing protein 5 [Source:UniProtKB/TrEMBL;Acc:F7AMK0]	ENSMMUT00000019871	1001	1180	+
ENSMMUG00000017214	VAV2	vav 2 guanine nucleotide exchange factor [Source:HGNC Symbol;Acc:HGNC:12658]	ENSMMUT00000024200	421	720	+
ENSMMUG00000020026	TBC1D23	TBC1 domain family member 23 isoform 2; Uncharacterized protein [Source:UniProtKB/TrEMBL;Acc:F7GGM6]	ENSMMUT00000028144	2309	2480	+
ENSMMUG00000020976	SSBP3	Uncharacterized protein [Source:UniProtKB/TrEMBL;Acc:F7HMU7]	ENSMMUT00000029499	1551	1700	+
ENSMMUG00000020025	TOMM70A	Mitochondrial import receptor subunit TOM70; Uncharacterized protein [Source:UniProtKB/TrEMBL;Acc:F7GGN2]	ENSMMUT00000028143	3271	3457	+
ENSMMUG00000002861	TMEM45A	Transmembrane protein 45A; Uncharacterized protein [Source:UniProtKB/TrEMBL;Acc:F6YZ93]	ENSMMUT00000047091	100	450	+
ENSMMUG00000006754	TTC4	Uncharacterized protein [Source:UniProtKB/TrEMBL;Acc:F6QZ42]	ENSMMUT00000009453	1491	1650	+
ENSMMUG00000002863	TFG	Protein TFG isoform 1; Uncharacterized protein [Source:UniProtKB/TrEMBL;Acc:F7HHW2]	ENSMMUT00000004055	1171	1470	+
ENSMMUG00000010857	RECQL	RecQ helicase-like [Source:HGNC Symbol;Acc:HGNC:9948]	ENSMMUT00000015186	2051	2191	+
ENSMMUG00000010859	GOLT1B	Golgi transport 1-like protein B; Uncharacterized protein [Source:UniProtKB/TrEMBL;Acc:F7G341]	ENSMMUT00000015189	561	869	+
ENSMMUG00000010981	SLC2A6	solute carrier family 2 (facilitated glucose transporter), member 6 [Source:HGNC Symbol;Acc:HGNC:11011]	ENSMMUT00000015361	1	180	+
ENSMMUG00000000937	ADAMTS13	ADAM metallopeptidase with thrombospondin type 1 motif, 13 [Source:HGNC Symbol;Acc:HGNC:1366]	ENSMMUT00000001339	4071	4470	+
ENSMMUG00000020808	CMAS	Uncharacterized protein [Source:UniProtKB/TrEMBL;Acc:F7H7Q0]	ENSMMUT00000029276	1101	1240	+
ENSMMUG00000022348	SURF4	Uncharacterized protein [Source:UniProtKB/TrEMBL;Acc:F6Z001]	ENSMMUT00000031440	1751	1860	+
ENSMMUG00000022344	SURF1	Surfeit locus protein 1; Uncharacterized protein [Source:UniProtKB/TrEMBL;Acc:F6ZCK1]	ENSMMUT00000031436	871	1000	+
ENSMMUG00000003685	ST8SIA1	Alpha-N-acetylneuraminide alpha-2,8-sialyltransferase; Uncharacterized protein [Source:UniProtKB/TrEMBL;Acc:F6SNF2]	ENSMMUT00000005215	1541	1760	+
ENSMMUG00000017782	PCNP	PEST proteolytic signal-containing nuclear protein; Uncharacterized protein [Source:UniProtKB/TrEMBL;Acc:F6R4G2]	ENSMMUT00000021994	2126	2240	+
ENSMMUG00000006641	C2CD5	C2 calcium-dependent domain containing 5 [Source:HGNC Symbol;Acc:HGNC:29062]	ENSMMUT00000009295	3291	3440	+
ENSMMUG00000015060	ZBTB11	Uncharacterized protein [Source:UniProtKB/TrEMBL;Acc:F6TKM4]	ENSMMUT00000021107	3011	3260	+
ENSMMUG00000006643	ETNK1	ethanolamine kinase 1 [Source:HGNC Symbol;Acc:HGNC:24649]	ENSMMUT00000009297	1	252	+
ENSMMUG00000021567	FAM55C	Putative uncharacterized protein FAM55C; Uncharacterized protein [Source:UniProtKB/TrEMBL;Acc:F7EDF4]	ENSMMUT00000030349	1731	1850	+
ENSMMUG00000021568	NFKBIZ	Uncharacterized protein [Source:UniProtKB/TrEMBL;Acc:F7A0S0]	ENSMMUT00000030353	981	1130	+
ENSMMUG00000022762	OMA1	Uncharacterized protein [Source:UniProtKB/TrEMBL;Acc:F7GCG3]	ENSMMUT00000032031	1471	1720	+
ENSMMUG00000011800	MYSM1	Uncharacterized protein [Source:UniProtKB/TrEMBL;Acc:F7A6Y3]	ENSMMUT00000047056	801	960	+
ENSMMUG00000009107	ALCAM	activated leukocyte cell adhesion molecule [Source:HGNC Symbol;Acc:HGNC:400]	ENSMMUT00000012743	4311	4500	+
ENSMMUG00000012223	BCAT1	Branched-chain-amino-acid aminotransferase [Source:UniProtKB/TrEMBL;Acc:F6VFX9]	ENSMMUT00000017116	1071	1170	+
ENSMMUG00000015274	RALGDS	ral guanine nucleotide dissociation stimulator [Source:HGNC Symbol;Acc:HGNC:9842]	ENSMMUT00000021415	2311	2890	+
ENSMMUG00000015374	LRMP	lymphoid-restricted membrane protein [Source:HGNC Symbol;Acc:HGNC:6690]	ENSMMUT00000021553	201	330	+
ENSMMUG00000007565	CBLB	Uncharacterized protein [Source:UniProtKB/TrEMBL;Acc:F6T053]	ENSMMUT00000010578	2921	3480	+
ENSMMUG00000008787	BBX	bobby sox homolog (Drosophila) [Source:HGNC Symbol;Acc:HGNC:14422]	ENSMMUT00000012279	2041	2140	+
ENSMMUG00000001267	GTF3C5	general transcription factor IIIC, polypeptide 5, 63kDa [Source:HGNC Symbol;Acc:HGNC:4668]	ENSMMUT00000001797	2131	2370	+
ENSMMUG00000023128	ITPR2	inositol 1,4,5-trisphosphate receptor, type 2 [Source:HGNC Symbol;Acc:HGNC:6181]	ENSMMUT00000047039	9231	9330	+
ENSMMUG00000008791	CD47	Uncharacterized protein [Source:UniProtKB/TrEMBL;Acc:F7A7Y5]	ENSMMUT00000012287	301	604	+
ENSMMUG00000006466	ASUN	asunder spermatogenesis regulator [Source:HGNC Symbol;Acc:HGNC:20174]	ENSMMUT00000009071	1916	2224	+
ENSMMUG00000009918	TSC1	Hamartin isoform 1; Uncharacterized protein [Source:UniProtKB/TrEMBL;Acc:F6Y6G0]	ENSMMUT00000013850	3511	3720	+
ENSMMUG00000003217	TM7SF3	transmembrane 7 superfamily member 3 [Source:HGNC Symbol;Acc:HGNC:23049]	ENSMMUT00000004558	2431	2620	+
ENSMMUG00000000894	KIAA1524	Uncharacterized protein [Source:UniProtKB/TrEMBL;Acc:F6T1A3]	ENSMMUT00000001278	2241	2570	+
ENSMMUG00000003218	MED21	Mediator of RNA polymerase II transcription subunit 21; Uncharacterized protein [Source:UniProtKB/TrEMBL;Acc:F7EAW2]	ENSMMUT00000004559	348	574	+
ENSMMUG00000023248	STK38L	Serine/threonine-protein kinase 38-like protein; Uncharacterized protein [Source:UniProtKB/TrEMBL;Acc:F7E684]	ENSMMUT00000032696	1401	1979	+
ENSMMUG00000002339	USP1	Ubiquitin carboxyl-terminal hydrolase [Source:UniProtKB/TrEMBL;Acc:F7C644]	ENSMMUT00000003313	1881	2020	+
ENSMMUG00000004590	DDX31	DEAD (Asp-Glu-Ala-Asp) box polypeptide 31 [Source:HGNC Symbol;Acc:HGNC:16715]	ENSMMUT00000047029	501	720	+
ENSMMUG00000000898	DZIP3	DAZ interacting zinc finger protein 3 [Source:HGNC Symbol;Acc:HGNC:30938]	ENSMMUT00000001285	1951	2090	+
ENSMMUG00000018468	SETX	senataxin [Source:HGNC Symbol;Acc:HGNC:445]	ENSMMUT00000025962	8081	8260	+
ENSMMUG00000001727	MED27	Uncharacterized protein [Source:UniProtKB/TrEMBL;Acc:F7GN95]	ENSMMUT00000002437	1041	1230	+
ENSMMUG00000021741	MRPS35	28S ribosomal protein S35, mitochondrial isoform 1; Uncharacterized protein [Source:UniProtKB/TrEMBL;Acc:F7DXV5]	ENSMMUT00000030596	751	910	+
ENSMMUG00000000386	ATG4C	Cysteine protease ATG4C isoform 8; Uncharacterized protein [Source:UniProtKB/TrEMBL;Acc:F6X5Z7]	ENSMMUT00000000560	391	770	+
ENSMMUG00000006479	RAPGEF1	Rap guanine nucleotide exchange factor (GEF) 1 [Source:HGNC Symbol;Acc:HGNC:4568]	ENSMMUT00000047017	3121	3280	+
ENSMMUG00000020046	ALG6	ALG6, alpha-1,3-glucosyltransferase [Source:HGNC Symbol;Acc:HGNC:23157]	ENSMMUT00000047018	1691	1890	+
ENSMMUG00000009976	UCK1	Uridine kinase [Source:UniProtKB/TrEMBL;Acc:F6R3B0]	ENSMMUT00000013932	871	1230	+
ENSMMUG00000009975	POMT1	protein-O-mannosyltransferase 1 [Source:HGNC Symbol;Acc:HGNC:9202]	ENSMMUT00000013930	2221	3003	+
ENSMMUG00000015811	ERGIC2	ERGIC and golgi 2 [Source:HGNC Symbol;Acc:HGNC:30208]	ENSMMUT00000022210	1	120	+
ENSMMUG00000020049	PGM1	Uncharacterized protein [Source:UniProtKB/TrEMBL;Acc:F7G9X6]	ENSMMUT00000028186	1921	2180	+
ENSMMUG00000015817	TMTC1	Uncharacterized protein [Source:UniProtKB/TrEMBL;Acc:F7AG29]	ENSMMUT00000022217	2661	3120	+
ENSMMUG00000009973	PRRC2B	proline-rich coiled-coil 2B [Source:HGNC Symbol;Acc:HGNC:28121]	ENSMMUT00000013924	4551	4660	+
ENSMMUG00000001361	IPO8	Importin-8; Importin-8 isoform 1; Uncharacterized protein [Source:UniProtKB/TrEMBL;Acc:F7D6M8]	ENSMMUT00000001925	3101	3685	+
ENSMMUG00000014232	ATG3	Autophagy-related protein 3 [Source:UniProtKB/TrEMBL;Acc:F7D7B0]	ENSMMUT00000019973	621	910	+
ENSMMUG00000001359	CAPRIN2	Uncharacterized protein [Source:UniProtKB/TrEMBL;Acc:F6Y0D5]	ENSMMUT00000046991	3711	3880	+
ENSMMUG00000021278	FAM78A	Putative uncharacterized protein FAM78A; Uncharacterized protein [Source:UniProtKB/TrEMBL;Acc:F6VF69]	ENSMMUT00000029937	1141	1330	+
ENSMMUG00000021724	NUP214	nucleoporin 214kDa [Source:HGNC Symbol;Acc:HGNC:8064]	ENSMMUT00000030575	4571	4810	+
ENSMMUG00000014236	SLC35A5	Putative UDP-sugar transporter protein SLC35A5; Uncharacterized protein [Source:UniProtKB/TrEMBL;Acc:F7D791]	ENSMMUT00000019977	691	1240	+
ENSMMUG00000018566	JAK1	Tyrosine-protein kinase [Source:UniProtKB/TrEMBL;Acc:F6YLX1]	ENSMMUT00000026100	1011	1230	+
ENSMMUG00000003199	CD200R1	Uncharacterized protein [Source:UniProtKB/TrEMBL;Acc:F7EF72]	ENSMMUT00000004532	1211	1420	+
ENSMMUG00000009155	FAM60A	Family with sequence similarity 60, member A; Uncharacterized protein [Source:UniProtKB/TrEMBL;Acc:F7HRP9]	ENSMMUT00000012801	301	420	+
ENSMMUG00000003221	DENND5B	DENN/MADD domain containing 5B [Source:HGNC Symbol;Acc:HGNC:28338]	ENSMMUT00000004564	1361	1692	+
ENSMMUG00000014876	C3orf17	chromosome 3 open reading frame 17 [Source:HGNC Symbol;Acc:HGNC:24496]	ENSMMUT00000020871	1361	1750	+
ENSMMUG00000012498	EXOSC2	exosome component 2 [Source:HGNC Symbol;Acc:HGNC:17097]	ENSMMUT00000017529	801	1100	+
ENSMMUG00000008249	FUBP3	far upstream element (FUSE) binding protein 3 [Source:HGNC Symbol;Acc:HGNC:4005]	ENSMMUT00000011531	531	710	+
ENSMMUG00000007490	PDE4B	Uncharacterized protein [Source:UniProtKB/TrEMBL;Acc:F6QKG3]	ENSMMUT00000010490	1581	2010	+
ENSMMUG00000013655	DNM1L	Dynamin-1-like protein isoform 3; Uncharacterized protein [Source:UniProtKB/TrEMBL;Acc:F7GI50]	ENSMMUT00000046968	1708	1870	+
ENSMMUG00000004200	GPR107	G protein-coupled receptor 107 [Source:HGNC Symbol;Acc:HGNC:17830]	ENSMMUT00000005969	1711	2066	+
ENSMMUG00000003797	USP20	ubiquitin specific peptidase 20 [Source:HGNC Symbol;Acc:HGNC:12619]	ENSMMUT00000005374	3851	3950	+
ENSMMUG00000001214	ALG10B	Alpha-1,2-glucosyltransferase ALG10-A; Uncharacterized protein [Source:UniProtKB/TrEMBL;Acc:F7DA70]	ENSMMUT00000001718	801	1050	+
ENSMMUG00000000643	MIER1	mesoderm induction early response 1, transcriptional regulator [Source:HGNC Symbol;Acc:HGNC:29657]	ENSMMUT00000000927	1391	1570	+
ENSMMUG00000000645	SLC35D1	UDP-glucuronic acid/UDP-N-acetylgalactosamine transporter; Uncharacterized protein [Source:UniProtKB/TrEMBL;Acc:F6XS30]	ENSMMUT00000000931	980	1269	+
ENSMMUG00000011816	ASB6	Uncharacterized protein [Source:UniProtKB/TrEMBL;Acc:F7H7C0]	ENSMMUT00000016551	1391	1810	+
ENSMMUG00000032034		Uncharacterized protein [Source:UniProtKB/TrEMBL;Acc:F7GZM5]	ENSMMUT00000029821	501	630	+
ENSMMUG00000020640	TIGIT	T cell immunoreceptor with Ig and ITIM domains [Source:HGNC Symbol;Acc:HGNC:26838]	ENSMMUT00000029037	3391	3581	+
ENSMMUG00000006057	METTL11A	Alpha N-terminal protein methyltransferase 1A; Uncharacterized protein [Source:UniProtKB/TrEMBL;Acc:F7HMB4]	ENSMMUT00000046949	771	971	+
ENSMMUG00000010443		Non-histone chromosomal protein HMG-17; Uncharacterized protein [Source:UniProtKB/TrEMBL;Acc:F7FJE3]	ENSMMUT00000014609	21	364	+
ENSMMUG00000011767	CRAT	Uncharacterized protein [Source:UniProtKB/TrEMBL;Acc:F7HQL2]	ENSMMUT00000016494	2351	2460	+
ENSMMUG00000000651	IL12RB2	interleukin 12 receptor, beta 2 [Source:HGNC Symbol;Acc:HGNC:5972]	ENSMMUT00000000941	2081	2590	+
ENSMMUG00000000652	SERBP1	Uncharacterized protein [Source:UniProtKB/TrEMBL;Acc:F6WZG6]	ENSMMUT00000000947	1321	1520	+
ENSMMUG00000015857	LRRK2	Uncharacterized protein [Source:UniProtKB/TrEMBL;Acc:F7C7Z0]	ENSMMUT00000022280	3961	4170	+
ENSMMUG00000011765	FAM73B	family with sequence similarity 73, member B [Source:HGNC Symbol;Acc:HGNC:23621]	ENSMMUT00000016488	401	610	+
ENSMMUG00000012010	TMEM39A	Transmembrane protein 39A; Uncharacterized protein [Source:UniProtKB/TrEMBL;Acc:F7H043]	ENSMMUT00000016822	1681	1885	+
ENSMMUG00000032029		Uncharacterized protein [Source:UniProtKB/TrEMBL;Acc:F7C7E8]	ENSMMUT00000022286	1	120	+
ENSMMUG00000014808	GADD45A	Growth arrest and DNA damage-inducible protein GADD45 alpha isoform 1; Uncharacterized protein [Source:UniProtKB/TrEMBL;Acc:F6W540]	ENSMMUT00000020772	916	1202	+
ENSMMUG00000012012	POGLUT1	Uncharacterized protein [Source:UniProtKB/TrEMBL;Acc:F7GYD9]	ENSMMUT00000016828	1121	1540	+
ENSMMUG00000011757	NUP188	nucleoporin 188kDa [Source:HGNC Symbol;Acc:HGNC:17859]	ENSMMUT00000016474	3151	3390	+
ENSMMUG00000012014	TIMMDC1	translocase of inner mitochondrial membrane domain containing 1 [Source:HGNC Symbol;Acc:HGNC:1321]	ENSMMUT00000016830	871	1132	+
ENSMMUG00000000900	ADPRH	Uncharacterized protein; [Protein ADP-ribosylarginine] hydrolase [Source:UniProtKB/TrEMBL;Acc:F6REF0]	ENSMMUT00000001286	3261	3411	+
ENSMMUG00000032024		Uncharacterized protein [Source:UniProtKB/TrEMBL;Acc:F7HRH0]	ENSMMUT00000046918	7	226	+
ENSMMUG00000003294	ENDOG	Uncharacterized protein [Source:UniProtKB/TrEMBL;Acc:F7FG25]	ENSMMUT00000004651	779	902	+
ENSMMUG00000019179	TBC1D13	TBC1 domain family member 13; Uncharacterized protein [Source:UniProtKB/TrEMBL;Acc:F6QZB0]	ENSMMUT00000026947	1161	1370	+
ENSMMUG00000010865	GXYLT1	glucoside xylosyltransferase 1 [Source:HGNC Symbol;Acc:HGNC:27482]	ENSMMUT00000046915	1381	1630	+
ENSMMUG00000010868	YAF2	Uncharacterized protein [Source:UniProtKB/TrEMBL;Acc:F7G033]	ENSMMUT00000046913	191	410	+
ENSMMUG00000010870	ZER1	Protein zer-1 homolog; Uncharacterized protein [Source:UniProtKB/TrEMBL;Acc:F7G019]	ENSMMUT00000015203	2651	2895	+
ENSMMUG00000010146	ZDHHC12	zinc finger, DHHC-type containing 12 [Source:HGNC Symbol;Acc:HGNC:19159]	ENSMMUT00000046910	611	880	+
ENSMMUG00000008532	SET	Uncharacterized protein [Source:UniProtKB/TrEMBL;Acc:F6WIP3]	ENSMMUT00000011927	701	843	+
ENSMMUG00000013852	SRSF11	Serine/arginine-rich splicing factor 11 isoform 1; Uncharacterized protein [Source:UniProtKB/TrEMBL;Acc:F7HTJ5]	ENSMMUT00000046903	441	1343	+
ENSMMUG00000009333	WDR34	WD repeat domain 34 [Source:HGNC Symbol;Acc:HGNC:28296]	ENSMMUT00000013045	1331	1510	+
ENSMMUG00000001980	GSK3B	glycogen synthase kinase 3 beta [Source:HGNC Symbol;Acc:HGNC:4617]	ENSMMUT00000002798	1	140	+
ENSMMUG00000013853	ANKRD13C	ankyrin repeat domain 13C [Source:HGNC Symbol;Acc:HGNC:25374]	ENSMMUT00000046901	1463	1694	+
ENSMMUG00000000075	LRRC58	Uncharacterized protein [Source:UniProtKB/TrEMBL;Acc:F7HJX5]	ENSMMUT00000000106	1111	1340	+
ENSMMUG00000001594	RABL3	Rab-like protein 3; Uncharacterized protein [Source:UniProtKB/TrEMBL;Acc:F7GV36]	ENSMMUT00000002254	2	200	+
ENSMMUG00000005989	GLE1	Nucleoporin GLE1 isoform 1; Uncharacterized protein [Source:UniProtKB/TrEMBL;Acc:F6UEL7]	ENSMMUT00000008376	2161	2260	+
ENSMMUG00000017312	ZRANB2	Uncharacterized protein; Zinc finger Ran-binding domain-containing protein 2 isoform 2 [Source:UniProtKB/TrEMBL;Acc:F7HS64]	ENSMMUT00000024335	951	1110	+
ENSMMUG00000005987	ODF2	outer dense fiber of sperm tails 2 [Source:HGNC Symbol;Acc:HGNC:8114]	ENSMMUT00000046888	1551	1730	+
ENSMMUG00000000205	TMEM117	Transmembrane protein 117; Uncharacterized protein [Source:UniProtKB/TrEMBL;Acc:F7HHB9]	ENSMMUT00000000304	1551	1750	+
ENSMMUG00000013546	GOLGB1	Uncharacterized protein [Source:UniProtKB/TrEMBL;Acc:F7FS54]	ENSMMUT00000019017	8361	8470	+
ENSMMUG00000032020	CERCAM	cerebral endothelial cell adhesion molecule [Source:HGNC Symbol;Acc:HGNC:23723]	ENSMMUT00000046883	1951	2270	+
ENSMMUG00000015962	ARID2	Uncharacterized protein [Source:UniProtKB/TrEMBL;Acc:F6XWD2]	ENSMMUT00000022445	5191	5530	+
ENSMMUG00000014593	CRYZ	Quinone oxidoreductase isoform a; Uncharacterized protein [Source:UniProtKB/TrEMBL;Acc:F7GW27]	ENSMMUT00000046878	1471	1600	+
ENSMMUG00000014595	TYW3	Uncharacterized protein; tRNA wybutosine-synthesizing protein 3 homolog isoform 1 [Source:UniProtKB/TrEMBL;Acc:F7GQ32]	ENSMMUT00000020471	681	796	+
ENSMMUG00000014148	SLC27A4	solute carrier family 27 (fatty acid transporter), member 4 [Source:HGNC Symbol;Acc:HGNC:10998]	ENSMMUT00000019859	1921	2432	+
ENSMMUG00000014146	TRUB2	TruB pseudouridine (psi) synthase family member 2 [Source:HGNC Symbol;Acc:HGNC:17170]	ENSMMUT00000019856	1351	1580	+
ENSMMUG00000023791	SCAF11	SR-related CTD-associated factor 11 [Source:HGNC Symbol;Acc:HGNC:10784]	ENSMMUT00000046876	3621	3790	+
ENSMMUG00000011999	SLC38A1	Sodium-coupled neutral amino acid transporter 1; Uncharacterized protein [Source:UniProtKB/TrEMBL;Acc:F7GW54]	ENSMMUT00000046870	2151	2323	+
ENSMMUG00000007220	ACADM	acyl-CoA dehydrogenase, C-4 to C-12 straight chain [Source:HGNC Symbol;Acc:HGNC:89]	ENSMMUT00000010088	1341	1450	+
ENSMMUG00000022359	SLC38A2	Amino acid transporter A2; Sodium-coupled neutral amino acid transporter 2; Uncharacterized protein [Source:UniProtKB/TrEMBL;Acc:F6Z5M8]	ENSMMUT00000031455	126	610	+
ENSMMUG00000016379	KPNA1	Importin subunit alpha [Source:UniProtKB/TrEMBL;Acc:F7G2W5]	ENSMMUT00000022995	1991	2290	+
ENSMMUG00000016381	PARP9	poly (ADP-ribose) polymerase family, member 9 [Source:HGNC Symbol;Acc:HGNC:24118]	ENSMMUT00000046864	1791	2020	+
ENSMMUG00000002203	FAM113B	Uncharacterized protein [Source:UniProtKB/TrEMBL;Acc:F6WF71]	ENSMMUT00000003120	771	950	+
ENSMMUG00000016383	DTX3L	Uncharacterized protein [Source:UniProtKB/TrEMBL;Acc:F7G2R1]	ENSMMUT00000023001	1721	1930	+
ENSMMUG00000020217	PIGK	GPI-anchor transamidase; Uncharacterized protein [Source:UniProtKB/TrEMBL;Acc:F6V958]	ENSMMUT00000028442	941	1210	+
ENSMMUG00000020547	PARP15	poly (ADP-ribose) polymerase family, member 15 [Source:HGNC Symbol;Acc:HGNC:26876]	ENSMMUT00000046861	1821	2010	+
ENSMMUG00000013712	CIZ1	CDKN1A interacting zinc finger protein 1 [Source:HGNC Symbol;Acc:HGNC:16744]	ENSMMUT00000019255	961	1120	+
ENSMMUG00000022569	PARP14	Uncharacterized protein [Source:UniProtKB/TrEMBL;Acc:F6ZKI8]	ENSMMUT00000031754	4761	4905	+
ENSMMUG00000020200		Uncharacterized protein [Source:UniProtKB/TrEMBL;Acc:F7BLV1]	ENSMMUT00000028420	483	670	+
ENSMMUG00000022572	HSPBAP1	HSPB (heat shock 27kDa) associated protein 1 [Source:HGNC Symbol;Acc:HGNC:16389]	ENSMMUT00000031757	1111	1604	+
ENSMMUG00000020219	ZZZ3	zinc finger, ZZ-type containing 3 [Source:HGNC Symbol;Acc:HGNC:24523]	ENSMMUT00000028446	1711	1930	+
ENSMMUG00000018326	USP33	ubiquitin specific peptidase 33 [Source:HGNC Symbol;Acc:HGNC:20059]	ENSMMUT00000025757	981	1223	+
ENSMMUG00000020628	ARPC5L	Actin-related protein 2/3 complex subunit 5 [Source:UniProtKB/TrEMBL;Acc:F7BM58]	ENSMMUT00000029023	1291	1580	+
ENSMMUG00000011441	TMEM106C	Endoplasmic reticulum membrane protein overexpressed in cancer; Transmembrane protein 106C isoform a; Uncharacterized protein [Source:UniProtKB/TrEMBL;Acc:F7B9V1]	ENSMMUT00000016015	1111	1370	+
ENSMMUG00000007702	SEC22A	SEC22 vesicle trafficking protein homolog A (S. cerevisiae) [Source:HGNC Symbol;Acc:HGNC:20260]	ENSMMUT00000010788	756	920	+
ENSMMUG00000007358	PSMB7	Proteasome subunit beta type [Source:UniProtKB/TrEMBL;Acc:F7E9M5]	ENSMMUT00000010282	784	970	+
ENSMMUG00000002350	IFI44	interferon-induced protein 44 [Source:HGNC Symbol;Acc:HGNC:16938]	ENSMMUT00000046846	1391	1589	+
ENSMMUG00000006348	DENND1A	DENN/MADD domain containing 1A [Source:HGNC Symbol;Acc:HGNC:29324]	ENSMMUT00000008907	2211	2420	+
ENSMMUG00000032012		Uncharacterized protein [Source:UniProtKB/TrEMBL;Acc:F7H6F6]	ENSMMUT00000046833	41	155	+
ENSMMUG00000020269			ENSMMUT00000028512	333	471	+
ENSMMUG00000022919	STRBP	Spermatid perinuclear RNA-binding protein isoform 1; Uncharacterized protein [Source:UniProtKB/TrEMBL;Acc:F6W6A5]	ENSMMUT00000046825	386	760	+
ENSMMUG00000032009	UMPS	Uncharacterized protein; Uridine 5'-monophosphate synthase [Source:UniProtKB/TrEMBL;Acc:F7H6L5]	ENSMMUT00000046818	541	670	+
ENSMMUG00000021134	RC3H2	Uncharacterized protein [Source:UniProtKB/TrEMBL;Acc:F7H8K8]	ENSMMUT00000029726	3601	3812	+
ENSMMUG00000008430	CACNB3	Uncharacterized protein; Voltage-dependent L-type calcium channel subunit beta-3 isoform 1 [Source:UniProtKB/TrEMBL;Acc:F6VB97]	ENSMMUT00000011789	1491	1650	+
ENSMMUG00000008432	DDX23	Probable ATP-dependent RNA helicase DDX23; Putative ATP-dependent RNA helicase DDX23; Uncharacterized protein [Source:UniProtKB/TrEMBL;Acc:F6VB85]	ENSMMUT00000011790	611	740	+
ENSMMUG00000003457	PRKACB	Uncharacterized protein [Source:UniProtKB/TrEMBL;Acc:F6QM55]	ENSMMUT00000004886	251	440	+
ENSMMUG00000006971	FKBP11	FK506 binding protein 11, 19 kDa [Source:HGNC Symbol;Acc:HGNC:18624]	ENSMMUT00000009745	541	682	+
ENSMMUG00000011106	SNX4	sorting nexin 4 [Source:HGNC Symbol;Acc:HGNC:11175]	ENSMMUT00000015524	981	1393	+
ENSMMUG00000012882	MRRF	mitochondrial ribosome recycling factor [Source:HGNC Symbol;Acc:HGNC:7234]	ENSMMUT00000046796	1131	1270	+
ENSMMUG00000022181	RPF1	Ribosome production factor 1; Uncharacterized protein [Source:UniProtKB/TrEMBL;Acc:F6XHR5]	ENSMMUT00000031195	231	400	+
ENSMMUG00000017125	OSBPL11	oxysterol binding protein-like 11 [Source:HGNC Symbol;Acc:HGNC:16397]	ENSMMUT00000024078	2981	3190	+
ENSMMUG00000015713	PRKAG1	Uncharacterized protein [Source:UniProtKB/TrEMBL;Acc:F6SF90]	ENSMMUT00000022060	971	1340	+
ENSMMUG00000011455	RBM18	Probable RNA-binding protein 18; Putative RNA-binding protein 18; RNA-binding motif protein 18; Uncharacterized protein [Source:UniProtKB/TrEMBL;Acc:F7B3N2]	ENSMMUT00000016035	1101	1290	+
ENSMMUG00000012847	SLC41A3	Uncharacterized protein [Source:UniProtKB/TrEMBL;Acc:F6TAX3]	ENSMMUT00000046794	1901	2073	+
ENSMMUG00000015718	KMT2D	lysine (K)-specific methyltransferase 2D [Source:HGNC Symbol;Acc:HGNC:7133]	ENSMMUT00000022067	13261	13560	+
ENSMMUG00000011450	NDUFA8	NADH dehydrogenase (ubiquinone) 1 alpha subcomplex, 8, 19kDa [Source:HGNC Symbol;Acc:HGNC:7692]	ENSMMUT00000016027	30	140	+
ENSMMUG00000012769	LMBR1L	limb development membrane protein 1-like [Source:HGNC Symbol;Acc:HGNC:18268]	ENSMMUT00000017920	2171	2310	+
ENSMMUG00000015403	MCOLN2	mucolipin 2 [Source:HGNC Symbol;Acc:HGNC:13357]	ENSMMUT00000021593	2361	2520	+
ENSMMUG00000013024	STOM	Uncharacterized protein [Source:UniProtKB/TrEMBL;Acc:F7HP15]	ENSMMUT00000018264	661	860	+
ENSMMUG00000008932	WDR63	WD repeat domain 63 [Source:HGNC Symbol;Acc:HGNC:30711]	ENSMMUT00000046787	2601	2920	+
ENSMMUG00000021081	TUBA1B	Uncharacterized protein [Source:UniProtKB/TrEMBL;Acc:F6Y0X7]	ENSMMUT00000046745	1444	1706	+
ENSMMUG00000005595	RAB14	Ras-related protein Rab-14; Uncharacterized protein [Source:UniProtKB/TrEMBL;Acc:F7G3Z8]	ENSMMUT00000007872	1021	1150	+
ENSMMUG00000010020	C1orf52	chromosome 1 open reading frame 52 [Source:HGNC Symbol;Acc:HGNC:24871]	ENSMMUT00000013987	281	730	+
ENSMMUG00000004195			ENSMMUT00000005958	615	1160	+
ENSMMUG00000017659	FBLN2	fibulin 2 [Source:HGNC Symbol;Acc:HGNC:3601]	ENSMMUT00000024829	2591	2743	+
ENSMMUG00000020123	TRAF1	Epstein-Barr virus-induced protein 6; TNF receptor-associated factor 1 isoform a; Uncharacterized protein [Source:UniProtKB/TrEMBL;Acc:F7GHV4]	ENSMMUT00000028314	1309	1869	+
ENSMMUG00000001646	FBXW2	F-box and WD repeat domain containing 2 [Source:HGNC Symbol;Acc:HGNC:13608]	ENSMMUT00000002327	1111	1310	+
ENSMMUG00000015979	NUP210	Uncharacterized protein [Source:UniProtKB/TrEMBL;Acc:F6XNW1]	ENSMMUT00000022467	6201	6650	+
ENSMMUG00000001342	IQSEC1	Uncharacterized protein [Source:UniProtKB/TrEMBL;Acc:F7B954]	ENSMMUT00000001899	1001	1160	+
ENSMMUG00000001340	RPL32	60S ribosomal protein L32; Uncharacterized protein [Source:UniProtKB/TrEMBL;Acc:F7B979]	ENSMMUT00000001896	21	220	+
ENSMMUG00000014056	HS2ST1	Heparan sulfate 2-O-sulfotransferase 1 isoform 1; Uncharacterized protein [Source:UniProtKB/TrEMBL;Acc:F7AGA6]	ENSMMUT00000019733	1361	1550	+
ENSMMUG00000007450	RAF1	RAF proto-oncogene serine/threonine-protein kinase; Uncharacterized protein [Source:UniProtKB/TrEMBL;Acc:F6SWC0]	ENSMMUT00000010416	2311	2636	+
ENSMMUG00000020588	PKN2	protein kinase N2 [Source:HGNC Symbol;Acc:HGNC:9406]	ENSMMUT00000028962	2581	2870	+
ENSMMUG00000007195	TSEN2	TSEN2 tRNA splicing endonuclease subunit [Source:HGNC Symbol;Acc:HGNC:28422]	ENSMMUT00000010049	731	880	+
ENSMMUG00000002794	GTF2B	Transcription initiation factor IIB; Uncharacterized protein [Source:UniProtKB/TrEMBL;Acc:F7H232]	ENSMMUT00000003964	831	1170	+
ENSMMUG00000019251	GBP3	guanylate binding protein 3 [Source:HGNC Symbol;Acc:HGNC:4184]	ENSMMUT00000027039	1571	1880	+
ENSMMUG00000021806	VGLL4	vestigial-like family member 4 [Source:HGNC Symbol;Acc:HGNC:28966]	ENSMMUT00000030686	791	973	+
ENSMMUG00000000662	GBP1	Uncharacterized protein [Source:UniProtKB/TrEMBL;Acc:F7A8B5]	ENSMMUT00000000954	1601	2219	+
ENSMMUG00000000663	GBP6	Uncharacterized protein [Source:UniProtKB/TrEMBL;Acc:F6RNS5]	ENSMMUT00000000957	2361	2569	+
ENSMMUG00000019936	SEC13	SEC13-related protein; Uncharacterized protein [Source:UniProtKB/TrEMBL;Acc:F7GMC8]	ENSMMUT00000046743	1041	1160	+
ENSMMUG00000012828	LRRC8D	Leucine-rich repeat-containing protein 8D; Uncharacterized protein [Source:UniProtKB/TrEMBL;Acc:F6TCH4]	ENSMMUT00000017995	2641	2760	+
ENSMMUG00000003442	ZNF326	Uncharacterized protein; Zinc finger protein 326 isoform 1 [Source:UniProtKB/TrEMBL;Acc:F7F4S6]	ENSMMUT00000004871	1769	1940	+
ENSMMUG00000019933		Uncharacterized protein [Source:UniProtKB/TrEMBL;Acc:F7GMD6]	ENSMMUT00000027999	661	921	+
ENSMMUG00000031981			ENSMMUT00000012203	245	370	+
ENSMMUG00000009788		Uncharacterized protein [Source:UniProtKB/TrEMBL;Acc:F7DXF0]	ENSMMUT00000030600	1191	1335	+
ENSMMUG00000018285	CRELD1	Uncharacterized protein [Source:UniProtKB/TrEMBL;Acc:F7GW64]	ENSMMUT00000025698	1861	2140	+
ENSMMUG00000004900	C15H9ORF91	Uncharacterized protein [Source:UniProtKB/TrEMBL;Acc:F7CJG5]	ENSMMUT00000006920	1361	1680	+
ENSMMUG00000004899	ATP6V1G1	ATPase, H+ transporting, lysosomal 13kDa, V1 subunit G1 [Source:HGNC Symbol;Acc:HGNC:864]	ENSMMUT00000006919	20	370	+
ENSMMUG00000011010	CDC7	Cell division cycle 7-related protein kinase; Uncharacterized protein [Source:UniProtKB/TrEMBL;Acc:F7GQW8]	ENSMMUT00000015393	1341	1617	+
ENSMMUG00000008018	AKNA	AT-hook transcription factor [Source:HGNC Symbol;Acc:HGNC:24108]	ENSMMUT00000011218	841	1080	+
ENSMMUG00000018280	JAGN1	jagunal homolog 1 (Drosophila) [Source:HGNC Symbol;Acc:HGNC:26926]	ENSMMUT00000025687	811	980	+
ENSMMUG00000010095	GLMN	glomulin, FKBP associated protein [Source:HGNC Symbol;Acc:HGNC:14373]	ENSMMUT00000014091	1	280	+
ENSMMUG00000010628	RPUSD3	RNA pseudouridylate synthase domain containing 3 [Source:HGNC Symbol;Acc:HGNC:28437]	ENSMMUT00000005013	851	1200	+
ENSMMUG00000022498	FMNL3	Uncharacterized protein [Source:UniProtKB/TrEMBL;Acc:F6YW64]	ENSMMUT00000031644	2611	2890	+
ENSMMUG00000005068	GFI1	Uncharacterized protein; Zinc finger protein Gfi-1 [Source:UniProtKB/TrEMBL;Acc:F7C4S3]	ENSMMUT00000007148	2071	2590	+
ENSMMUG00000005960	TMBIM6	Bax inhibitor 1; Uncharacterized protein [Source:UniProtKB/TrEMBL;Acc:F7GWD0]	ENSMMUT00000008344	1041	1150	+
ENSMMUG00000005075			ENSMMUT00000007157	51	150	+
ENSMMUG00000016808	MTF2	Uncharacterized protein [Source:UniProtKB/TrEMBL;Acc:F7CTR3]	ENSMMUT00000046698	1701	2116	+
ENSMMUG00000022911	BCDIN3D	Putative methyltransferase BCDIN3D; Uncharacterized protein [Source:UniProtKB/TrEMBL;Acc:F6W792]	ENSMMUT00000032253	791	940	+
ENSMMUG00000006116	BRPF1	bromodomain and PHD finger containing, 1 [Source:HGNC Symbol;Acc:HGNC:14255]	ENSMMUT00000008551	711	810	+
ENSMMUG00000016811	TMED5	Transmembrane emp24 domain-containing protein 5 isoform 1; Uncharacterized protein [Source:UniProtKB/TrEMBL;Acc:F7CTP8]	ENSMMUT00000023618	2761	2880	+
ENSMMUG00000007808	MTMR14	myotubularin related protein 14 [Source:HGNC Symbol;Acc:HGNC:26190]	ENSMMUT00000010937	1981	2210	+
ENSMMUG00000005844	PRPF4	U4/U6 small nuclear ribonucleoprotein Prp4; Uncharacterized protein [Source:UniProtKB/TrEMBL;Acc:F6TT32]	ENSMMUT00000008195	1821	2000	+
ENSMMUG00000006531	SMARCD1	SWI/SNF-related matrix-associated actin-dependent regulator of chromatin subfamily D member 1 isoform a; Uncharacterized protein [Source:UniProtKB/TrEMBL;Acc:F7HTX9]	ENSMMUT00000009155	401	590	+
ENSMMUG00000016818	DR1	Protein Dr1; Uncharacterized protein [Source:UniProtKB/TrEMBL;Acc:F7C9G1]	ENSMMUT00000023633	411	1080	+
ENSMMUG00000016471	CERS5	ceramide synthase 5 [Source:HGNC Symbol;Acc:HGNC:23749]	ENSMMUT00000023135	1781	1970	+
ENSMMUG00000003943	SETD5	Uncharacterized protein [Source:UniProtKB/TrEMBL;Acc:F6ZMI9]	ENSMMUT00000005591	4131	4700	+
ENSMMUG00000017307	THUMPD3	THUMP domain containing 3 [Source:HGNC Symbol;Acc:HGNC:24493]	ENSMMUT00000046669	1271	1450	+
ENSMMUG00000013857	GCLM	Glutamate--cysteine ligase regulatory subunit; Uncharacterized protein [Source:UniProtKB/TrEMBL;Acc:F6RLS0]	ENSMMUT00000019447	1021	1126	+
ENSMMUG00000008172	LARP4	La ribonucleoprotein domain family, member 4 [Source:HGNC Symbol;Acc:HGNC:24320]	ENSMMUT00000046660	1951	2410	+
ENSMMUG00000000464	ROD1	Uncharacterized protein [Source:UniProtKB/TrEMBL;Acc:F6YQQ9]	ENSMMUT00000000686	1411	1693	+
ENSMMUG00000010565	DIP2B	DIP2 disco-interacting protein 2 homolog B (Drosophila) [Source:HGNC Symbol;Acc:HGNC:29284]	ENSMMUT00000046650	4541	4760	+
ENSMMUG00000008807	EDEM1	ER degradation-enhancing alpha-mannosidase-like 1; Uncharacterized protein [Source:UniProtKB/TrEMBL;Acc:F7F1M7]	ENSMMUT00000012313	2051	2280	+
ENSMMUG00000008810		ADP-ribosylation factor-like protein 8B; Uncharacterized protein [Source:UniProtKB/TrEMBL;Acc:F7F1D7]	ENSMMUT00000012317	1011	1110	+
ENSMMUG00000014588	BHLHE40	Class E basic helix-loop-helix protein 40; Uncharacterized protein [Source:UniProtKB/TrEMBL;Acc:F7GRJ4]	ENSMMUT00000020459	1251	1560	+
ENSMMUG00000012095	ATF1	Cyclic AMP-dependent transcription factor ATF-1; Uncharacterized protein [Source:UniProtKB/TrEMBL;Acc:F7HB38]	ENSMMUT00000016937	1130	1345	+
ENSMMUG00000012574	ITPR1	inositol 1,4,5-trisphosphate receptor, type 1 [Source:HGNC Symbol;Acc:HGNC:6180]	ENSMMUT00000046629	7561	7730	+
ENSMMUG00000012749		Uncharacterized protein [Source:UniProtKB/TrEMBL;Acc:F7ENP9]	ENSMMUT00000017883	961	1140	+
ENSMMUG00000018485	METTL7A	Methyltransferase-like protein 7A; Uncharacterized protein [Source:UniProtKB/TrEMBL;Acc:F6X1K2]	ENSMMUT00000025992	1	140	+
ENSMMUG00000022961	SLC11A2	Natural resistance-associated macrophage protein 2 isoform 1; Uncharacterized protein [Source:UniProtKB/TrEMBL;Acc:F6U6C6]	ENSMMUT00000046646	3021	3460	+
ENSMMUG00000014013	ABCD3	ATP-binding cassette, sub-family D (ALD), member 3 [Source:HGNC Symbol;Acc:HGNC:67]	ENSMMUT00000019668	1562	1780	+
ENSMMUG00000016315	KIAA0368	KIAA0368 [Source:HGNC Symbol;Acc:HGNC:29020]	ENSMMUT00000022916	3631	3830	+
ENSMMUG00000012453	LETMD1	LETM1 domain containing 1 [Source:HGNC Symbol;Acc:HGNC:24241]	ENSMMUT00000017460	1991	2120	+
ENSMMUG00000004759	RWDD3	RWD domain containing 3 [Source:HGNC Symbol;Acc:HGNC:21393]	ENSMMUT00000046637	401	500	+
ENSMMUG00000012457	CSRNP2	cysteine-serine-rich nuclear protein 2 [Source:HGNC Symbol;Acc:HGNC:16006]	ENSMMUT00000017463	841	1720	+
ENSMMUG00000004734	SUMF1	sulfatase modifying factor 1 [Source:HGNC Symbol;Acc:HGNC:20376]	ENSMMUT00000006685	1017	1291	+
ENSMMUG00000000152	TFCP2	Uncharacterized protein [Source:UniProtKB/TrEMBL;Acc:F7HG29]	ENSMMUT00000046624	1131	1300	+
ENSMMUG00000001884	DAZAP2	DAZ associated protein 2 [Source:HGNC Symbol;Acc:HGNC:2684]	ENSMMUT00000002653	1	170	+
ENSMMUG00000009425	ACTB	Uncharacterized protein [Source:UniProtKB/TrEMBL;Acc:F6X9G9]	ENSMMUT00000013155	1111	1430	+
ENSMMUG00000016388	FRRS1	ferric-chelate reductase 1 [Source:HGNC Symbol;Acc:HGNC:27622]	ENSMMUT00000023009	1741	1900	+
ENSMMUG00000021441	AGL	amylo-alpha-1, 6-glucosidase, 4-alpha-glucanotransferase [Source:HGNC Symbol;Acc:HGNC:321]	ENSMMUT00000046612	3991	4404	+
ENSMMUG00000004238	HIAT1	hippocampus abundant transcript 1 [Source:HGNC Symbol;Acc:HGNC:23363]	ENSMMUT00000006013	1382	1846	+
ENSMMUG00000016959	PPP4R2	protein phosphatase 4, regulatory subunit 2 [Source:HGNC Symbol;Acc:HGNC:18296]	ENSMMUT00000023827	1343	1560	+
ENSMMUG00000009571		Uncharacterized protein [Source:UniProtKB/TrEMBL;Acc:F6X5F4]	ENSMMUT00000013352	1641	1740	+
ENSMMUG00000015392	C11H12ORF44	Uncharacterized protein [Source:UniProtKB/TrEMBL;Acc:F6S8V3]	ENSMMUT00000046599	1001	1320	+
ENSMMUG00000000689	FAM206A	Uncharacterized protein [Source:UniProtKB/TrEMBL;Acc:F6Z045]	ENSMMUT00000000988	421	540	+
ENSMMUG00000007128	RYBP	Uncharacterized protein [Source:UniProtKB/TrEMBL;Acc:F7DTJ9]	ENSMMUT00000009941	3091	3260	+
ENSMMUG00000019357	IKBKAP	inhibitor of kappa light polypeptide gene enhancer in B-cells, kinase complex-associated protein [Source:HGNC Symbol;Acc:HGNC:5959]	ENSMMUT00000027191	4001	4200	+
ENSMMUG00000002889	FOXP1	Uncharacterized protein [Source:UniProtKB/TrEMBL;Acc:F7HDF9]	ENSMMUT00000011204	2551	2690	+
ENSMMUG00000019105	RTCA	RNA 3'-terminal phosphate cyclase [Source:HGNC Symbol;Acc:HGNC:17981]	ENSMMUT00000026849	1365	1500	+
ENSMMUG00000014944	RAD23B	RAD23 homolog B (S. cerevisiae) [Source:HGNC Symbol;Acc:HGNC:9813]	ENSMMUT00000020955	1251	1630	+
ENSMMUG00000003728	SLC30A7	Uncharacterized protein; Zinc transporter 7 [Source:UniProtKB/TrEMBL;Acc:F6S235]	ENSMMUT00000005275	1001	1280	+
ENSMMUG00000015024	SLC44A1	solute carrier family 44 (choline transporter), member 1 [Source:HGNC Symbol;Acc:HGNC:18798]	ENSMMUT00000021065	3729	4164	+
ENSMMUG00000003730	DPH5	diphthamide biosynthesis 5 [Source:HGNC Symbol;Acc:HGNC:24270]	ENSMMUT00000005277	631	845	+
ENSMMUG00000012385			ENSMMUT00000017366	740	870	+
ENSMMUG00000020608	ABCA1	Uncharacterized protein [Source:UniProtKB/TrEMBL;Acc:F7BTN9]	ENSMMUT00000028999	6041	6280	+
ENSMMUG00000008627	ARL6IP5	PRA1 family protein 3; Uncharacterized protein [Source:UniProtKB/TrEMBL;Acc:F7FCU0]	ENSMMUT00000012063	541	1040	+
ENSMMUG00000008620	UBA3	Uncharacterized protein [Source:UniProtKB/TrEMBL;Acc:F7FCV2]	ENSMMUT00000012059	6	200	+
ENSMMUG00000020463	SMC2	Uncharacterized protein [Source:UniProtKB/TrEMBL;Acc:F6VS74]	ENSMMUT00000046564	2871	3060	+
ENSMMUG00000009693	SUCLG2	Uncharacterized protein [Source:UniProtKB/TrEMBL;Acc:F6Y3N7]	ENSMMUT00000013533	1731	1860	+
ENSMMUG00000004081	KBTBD8	Uncharacterized protein [Source:UniProtKB/TrEMBL;Acc:F6ZJ59]	ENSMMUT00000005790	1351	1560	+
ENSMMUG00000016670	RNF20	E3 ubiquitin-protein ligase BRE1A; Uncharacterized protein [Source:UniProtKB/TrEMBL;Acc:F6VU61]	ENSMMUT00000023429	3031	3310	+
ENSMMUG00000001531	LRIG1	leucine-rich repeats and immunoglobulin-like domains 1 [Source:HGNC Symbol;Acc:HGNC:17360]	ENSMMUT00000002164	2681	3040	+
ENSMMUG00000001529	SLC25A26	Uncharacterized protein [Source:UniProtKB/TrEMBL;Acc:F7GC43]	ENSMMUT00000046558	671	970	+
ENSMMUG00000023797	C9ORF125	Transmembrane protein C9orf125; Uncharacterized protein [Source:UniProtKB/TrEMBL;Acc:F7HRC5]	ENSMMUT00000033487	1771	1930	+
ENSMMUG00000018039	RNPC3	RNA-binding region (RNP1, RRM) containing 3 [Source:HGNC Symbol;Acc:HGNC:18666]	ENSMMUT00000025339	751	970	+
ENSMMUG00000023794	MRPL50	39S ribosomal protein L50, mitochondrial; Uncharacterized protein [Source:UniProtKB/TrEMBL;Acc:F7HT84]	ENSMMUT00000033482	381	500	+
ENSMMUG00000006802	PRMT6	Protein arginine N-methyltransferase 6; Uncharacterized protein [Source:UniProtKB/TrEMBL;Acc:F7H1A9]	ENSMMUT00000009512	991	1309	+
ENSMMUG00000001526	TEX10	Testis-expressed sequence 10 protein; Uncharacterized protein [Source:UniProtKB/TrEMBL;Acc:F7GC51]	ENSMMUT00000002156	261	850	+
ENSMMUG00000000329	SPRYD3	SPRY domain containing 3 [Source:HGNC Symbol;Acc:HGNC:25920]	ENSMMUT00000000483	1011	1250	+
ENSMMUG00000001524	INVS	Uncharacterized protein [Source:UniProtKB/TrEMBL;Acc:F7GC62]	ENSMMUT00000002149	3071	3170	+
ENSMMUG00000001509	PSMD6	26S proteasome non-ATPase regulatory subunit 6; Uncharacterized protein [Source:UniProtKB/TrEMBL;Acc:F7GFM2]	ENSMMUT00000046530	1791	1890	+
ENSMMUG00000011415	ERP44	endoplasmic reticulum protein 44 [Source:HGNC Symbol;Acc:HGNC:18311]	ENSMMUT00000015983	451	594	+
ENSMMUG00000002789	SLC25A24	Uncharacterized protein [Source:UniProtKB/TrEMBL;Acc:F7H241]	ENSMMUT00000003957	1361	1760	+
ENSMMUG00000005245	ITGB7	integrin, beta 7 [Source:HGNC Symbol;Acc:HGNC:6162]	ENSMMUT00000007384	2091	2360	+
ENSMMUG00000001304	TGFBR1	TGF-beta receptor type-1; Uncharacterized protein [Source:UniProtKB/TrEMBL;Acc:F7BNR8]	ENSMMUT00000001844	1291	1410	+
ENSMMUG00000010155	PRPF38B	Pre-mRNA-splicing factor 38B; Uncharacterized protein [Source:UniProtKB/TrEMBL;Acc:F6QPW1]	ENSMMUT00000014178	1121	1941	+
ENSMMUG00000022020	MFSD5	Major facilitator superfamily domain-containing protein 5; Major facilitator superfamily domain-containing protein 5 isoform 2; Uncharacterized protein [Source:UniProtKB/TrEMBL;Acc:F6RB32]	ENSMMUT00000030982	821	1000	+
ENSMMUG00000022021	ESPL1	extra spindle pole bodies homolog 1 (S. cerevisiae) [Source:HGNC Symbol;Acc:HGNC:16856]	ENSMMUT00000030991	4441	4700	+
ENSMMUG00000019561	GALNT12	Uncharacterized protein [Source:UniProtKB/TrEMBL;Acc:F7BMV2]	ENSMMUT00000027480	1621	1840	+
ENSMMUG00000015672	PDHB	Pyruvate dehydrogenase E1 component subunit beta, mitochondrial isoform 1; Uncharacterized protein [Source:UniProtKB/TrEMBL;Acc:F6R4J1]	ENSMMUT00000046499	811	1010	+
ENSMMUG00000020036	SP1	Transcription factor Sp1 isoform a; Uncharacterized protein [Source:UniProtKB/TrEMBL;Acc:F7GDJ8]	ENSMMUT00000028166	2431	2630	+
ENSMMUG00000006608		Uncharacterized protein [Source:UniProtKB/TrEMBL;Acc:F6QDF0]	ENSMMUT00000009244	211	320	+
ENSMMUG00000031892			ENSMMUT00000046502	768	906	+
ENSMMUG00000009265	WDR47	WD repeat domain 47 [Source:HGNC Symbol;Acc:HGNC:29141]	ENSMMUT00000012951	2901	3110	+
ENSMMUG00000012242	ANP32B	Acidic leucine-rich nuclear phosphoprotein 32 family member B; Uncharacterized protein [Source:UniProtKB/TrEMBL;Acc:F6V8C0]	ENSMMUT00000017143	411	750	+
ENSMMUG00000015654	C9orf156	chromosome 9 open reading frame 156 [Source:HGNC Symbol;Acc:HGNC:30967]	ENSMMUT00000046494	531	1040	+
ENSMMUG00000002841		Uncharacterized protein [Source:UniProtKB/TrEMBL;Acc:F7H2H7]	ENSMMUT00000004027	631	980	+
ENSMMUG00000006315	ABHD6	Uncharacterized protein [Source:UniProtKB/TrEMBL;Acc:F7HIR3]	ENSMMUT00000046489	1241	1440	+
ENSMMUG00000018492	TARBP2	TAR (HIV-1) RNA binding protein 2 [Source:HGNC Symbol;Acc:HGNC:11569]	ENSMMUT00000026007	1531	1718	+
ENSMMUG00000021837	SARS	seryl-tRNA synthetase [Source:HGNC Symbol;Acc:HGNC:10537]	ENSMMUT00000030726	381	640	+
ENSMMUG00000012281	NCBP1	80 kDa nuclear cap-binding protein; Uncharacterized protein [Source:UniProtKB/TrEMBL;Acc:F7DRW1]	ENSMMUT00000017202	1942	2160	+
ENSMMUG00000012279	TSTD2	Uncharacterized protein [Source:UniProtKB/TrEMBL;Acc:F7DS33]	ENSMMUT00000017200	1341	1538	+
ENSMMUG00000016241	ATP5G1	Uncharacterized protein [Source:UniProtKB/TrEMBL;Acc:F7GGY3]	ENSMMUT00000046480	131	240	+
ENSMMUG00000009457	CALCOCO1	Uncharacterized protein [Source:UniProtKB/TrEMBL;Acc:F7AA22]	ENSMMUT00000046479	3451	3640	+
ENSMMUG00000005813	PSMA5	Proteasome subunit alpha type [Source:UniProtKB/TrEMBL;Acc:F6VLE9]	ENSMMUT00000008148	671	900	+
ENSMMUG00000004800	SLMAP	Uncharacterized protein [Source:UniProtKB/TrEMBL;Acc:F6S6L4]	ENSMMUT00000046475	1661	1850	+
ENSMMUG00000008667	DCAF10	DDB1 and CUL4 associated factor 10 [Source:HGNC Symbol;Acc:HGNC:23686]	ENSMMUT00000012115	3255	3360	+
ENSMMUG00000008665	EXOSC3	Exosome complex component RRP40 isoform 1; Uncharacterized protein [Source:UniProtKB/TrEMBL;Acc:F7F3T0]	ENSMMUT00000012112	641	920	+
ENSMMUG00000005818	GNAI3	Guanine nucleotide-binding protein G(K) subunit alpha; Uncharacterized protein [Source:UniProtKB/TrEMBL;Acc:F6VL43]	ENSMMUT00000008155	1211	1492	+
ENSMMUG00000012989	HNRNPA1	heterogeneous nuclear ribonucleoprotein A1 [Source:HGNC Symbol;Acc:HGNC:5031]	ENSMMUT00000018222	881	1040	+
ENSMMUG00000018619	DENND6A	DENN/MADD domain containing 6A [Source:HGNC Symbol;Acc:HGNC:26635]	ENSMMUT00000026175	1671	2107	+
ENSMMUG00000017887	TOMM5	Uncharacterized protein [Source:UniProtKB/TrEMBL;Acc:F7F1V2]	ENSMMUT00000025137	311	530	+
ENSMMUG00000018617	ARF4	ADP-ribosylation factor 4; Uncharacterized protein [Source:UniProtKB/TrEMBL;Acc:F6XZM8]	ENSMMUT00000026172	91	200	+
ENSMMUG00000017886	FBXO10	F-box protein 10 [Source:HGNC Symbol;Acc:HGNC:13589]	ENSMMUT00000025134	3351	3570	+
ENSMMUG00000000108	NCKAP1L	NCK-associated protein 1-like [Source:HGNC Symbol;Acc:HGNC:4862]	ENSMMUT00000000158	3517	3685	+
ENSMMUG00000019630	GSTM4	Uncharacterized protein [Source:UniProtKB/TrEMBL;Acc:F6VK76]	ENSMMUT00000027574	1441	1540	+
ENSMMUG00000010163	ARHGEF3	Rho guanine nucleotide exchange factor (GEF) 3 [Source:HGNC Symbol;Acc:HGNC:683]	ENSMMUT00000046452	2711	2960	+
ENSMMUG00000006135	GNE	glucosamine (UDP-N-acetyl)-2-epimerase/N-acetylmannosamine kinase [Source:HGNC Symbol;Acc:HGNC:23657]	ENSMMUT00000008576	2001	2326	+
ENSMMUG00000002820	FAM208A	Uncharacterized protein [Source:UniProtKB/TrEMBL;Acc:F7H086]	ENSMMUT00000003993	4481	4590	+
ENSMMUG00000016203	KIAA0748	Uncharacterized protein [Source:UniProtKB/TrEMBL;Acc:F7FPM2]	ENSMMUT00000022768	791	910	+
ENSMMUG00000019269	ACTR8	Uncharacterized protein [Source:UniProtKB/TrEMBL;Acc:F6SI88]	ENSMMUT00000027064	1701	2130	+
ENSMMUG00000002680	CSF1	Uncharacterized protein [Source:UniProtKB/TrEMBL;Acc:F7HKZ9]	ENSMMUT00000003818	1901	2190	+
ENSMMUG00000013232	CD63	CD63 antigen isoform A; Melanoma-associated antigen ME491; Uncharacterized protein [Source:UniProtKB/TrEMBL;Acc:F6XET9]	ENSMMUT00000018559	871	1060	+
ENSMMUG00000022715	AHCYL1	Uncharacterized protein [Source:UniProtKB/TrEMBL;Acc:F7GIM7]	ENSMMUT00000031968	2331	2509	+
ENSMMUG00000005426	STRIP1	striatin interacting protein 1 [Source:HGNC Symbol;Acc:HGNC:25916]	ENSMMUT00000007635	2281	2680	+
ENSMMUG00000006292	ORMDL2	ORM1-like 2 (S. cerevisiae) [Source:HGNC Symbol;Acc:HGNC:16037]	ENSMMUT00000008810	1	130	+
ENSMMUG00000006293	DNAJC14	DnaJ (Hsp40) homolog, subfamily C, member 14 [Source:HGNC Symbol;Acc:HGNC:24581]	ENSMMUT00000008812	731	890	+
ENSMMUG00000016333	RGP1	Retrograde Golgi transport protein RGP1 homolog; Uncharacterized protein [Source:UniProtKB/TrEMBL;Acc:F7GRM3]	ENSMMUT00000022937	1241	1340	+
ENSMMUG00000016331	GBA2	glucosidase, beta (bile acid) 2 [Source:HGNC Symbol;Acc:HGNC:18986]	ENSMMUT00000046426	3287	3630	+
ENSMMUG00000011208	DCP1A	Uncharacterized protein; mRNA-decapping enzyme 1A [Source:UniProtKB/TrEMBL;Acc:F6UKG6]	ENSMMUT00000015679	1811	2050	+
ENSMMUG00000018814	DGKA	Uncharacterized protein [Source:UniProtKB/TrEMBL;Acc:F6ZHF9]	ENSMMUT00000046425	2581	2680	+
ENSMMUG00000016328	CREB3	Uncharacterized protein [Source:UniProtKB/TrEMBL;Acc:F7GSV7]	ENSMMUT00000022933	891	1110	+
ENSMMUG00000031856	TLN1	talin 1 [Source:HGNC Symbol;Acc:HGNC:11845]	ENSMMUT00000046424	7331	8030	+
ENSMMUG00000015023	HBXIP	Uncharacterized protein [Source:UniProtKB/TrEMBL;Acc:F6V595]	ENSMMUT00000021062	251	350	+
ENSMMUG00000016197	RFT1	RFT1 homolog (S. cerevisiae) [Source:HGNC Symbol;Acc:HGNC:30220]	ENSMMUT00000022755	2281	2530	+
ENSMMUG00000000811	CD53	CD53 molecule [Source:HGNC Symbol;Acc:HGNC:1686]	ENSMMUT00000001175	921	1340	+
ENSMMUG00000014527	SFMBT1	Scm-like with four mbt domains 1 [Source:HGNC Symbol;Acc:HGNC:20255]	ENSMMUT00000020381	2781	3040	+
ENSMMUG00000016323	ARHGEF39	Rho guanine nucleotide exchange factor (GEF) 39 [Source:HGNC Symbol;Acc:HGNC:25909]	ENSMMUT00000046416	1171	1450	+
ENSMMUG00000016327	CCDC107	coiled-coil domain containing 107 [Source:HGNC Symbol;Acc:HGNC:28465]	ENSMMUT00000022930	642	810	+
ENSMMUG00000002461	CEPT1	Choline/ethanolaminephosphotransferase 1; Uncharacterized protein [Source:UniProtKB/TrEMBL;Acc:F7HL54]	ENSMMUT00000003505	1	430	+
ENSMMUG00000014526	TMEM110	Transmembrane protein 110; Uncharacterized protein [Source:UniProtKB/TrEMBL;Acc:F7GAD6]	ENSMMUT00000020379	1111	1210	+
ENSMMUG00000018817	CDK2	cyclin-dependent kinase 2 [Source:HGNC Symbol;Acc:HGNC:1771]	ENSMMUT00000026459	1091	1270	+
ENSMMUG00000016316	TESK1	Dual specificity testis-specific protein kinase 1; Uncharacterized protein [Source:UniProtKB/TrEMBL;Acc:F7GT25]	ENSMMUT00000022914	2061	2406	+
ENSMMUG00000007519			ENSMMUT00000010518	201	390	+
ENSMMUG00000017042		40S ribosomal protein S26; Uncharacterized protein [Source:UniProtKB/TrEMBL;Acc:F7HQQ4]	ENSMMUT00000023957	485	650	+
ENSMMUG00000002164	PA2G4	Uncharacterized protein [Source:UniProtKB/TrEMBL;Acc:F6U975]	ENSMMUT00000046387	1481	1633	+
ENSMMUG00000003311	WDR77	Methylosome protein 50; Uncharacterized protein [Source:UniProtKB/TrEMBL;Acc:F7EL45]	ENSMMUT00000004682	2001	2100	+
ENSMMUG00000031842	CHCHD3	Coiled-coil-helix-coiled-coil-helix domain-containing protein 3, mitochondrial; Uncharacterized protein [Source:UniProtKB/TrEMBL;Acc:F7G3N0]	ENSMMUT00000046391	211	450	+
ENSMMUG00000012526	GLT8D1	Glycosyltransferase 8 domain-containing protein 1; Uncharacterized protein [Source:UniProtKB/TrEMBL;Acc:F7ECP8]	ENSMMUT00000046388	1021	1400	+
ENSMMUG00000003313	ATP5F1	ATP synthase subunit b, mitochondrial; Uncharacterized protein [Source:UniProtKB/TrEMBL;Acc:F7EHQ1]	ENSMMUT00000004684	611	910	+
ENSMMUG00000011864	STOML2	Stomatin-like protein 2; Uncharacterized protein [Source:UniProtKB/TrEMBL;Acc:F7H2K5]	ENSMMUT00000016624	621	816	+
ENSMMUG00000021979	ESYT1	Extended synaptotagmin-1 isoform 2; Uncharacterized protein [Source:UniProtKB/TrEMBL;Acc:F6RSH0]	ENSMMUT00000030926	1211	1350	+
ENSMMUG00000012511	GNL3	guanine nucleotide binding protein-like 3 (nucleolar) [Source:HGNC Symbol;Acc:HGNC:29931]	ENSMMUT00000017554	1331	1500	+
ENSMMUG00000017361	PBRM1	Uncharacterized protein [Source:UniProtKB/TrEMBL;Acc:F7H6U8]	ENSMMUT00000024425	3931	4190	+
ENSMMUG00000014489	DDX20	DEAD (Asp-Glu-Ala-Asp) box polypeptide 20 [Source:HGNC Symbol;Acc:HGNC:2743]	ENSMMUT00000020325	2511	2890	+
ENSMMUG00000020190	VCP	Uncharacterized protein [Source:UniProtKB/TrEMBL;Acc:F6WT88]	ENSMMUT00000046375	2601	2920	+
ENSMMUG00000008273	SMARCC2	SWI/SNF related, matrix associated, actin dependent regulator of chromatin, subfamily c, member 2 [Source:HGNC Symbol;Acc:HGNC:11105]	ENSMMUT00000011570	2351	2540	+
ENSMMUG00000021981	RNF41	E3 ubiquitin-protein ligase NRDP1; E3 ubiquitin-protein ligase NRDP1 isoform 1; Uncharacterized protein [Source:UniProtKB/TrEMBL;Acc:F6RSF7]	ENSMMUT00000046371	1741	1930	+
ENSMMUG00000008679	ANKRD52	ankyrin repeat domain 52 [Source:HGNC Symbol;Acc:HGNC:26614]	ENSMMUT00000012130	1431	1600	+
ENSMMUG00000005619	NISCH	nischarin [Source:HGNC Symbol;Acc:HGNC:18006]	ENSMMUT00000007901	4931	5060	+
ENSMMUG00000002483	CS	citrate synthase [Source:HGNC Symbol;Acc:HGNC:2422]	ENSMMUT00000003531	2541	2750	+
ENSMMUG00000013271	CNPY2	MIR-interacting saposin-like protein; Protein canopy homolog 2 isoform 1; Uncharacterized protein [Source:UniProtKB/TrEMBL;Acc:F6Z678]	ENSMMUT00000018635	1011	1198	+
ENSMMUG00000013482	PAN2	PAB-dependent poly(A)-specific ribonuclease subunit 2 isoform 3; Uncharacterized protein [Source:UniProtKB/TrEMBL;Acc:F6ZLF2]	ENSMMUT00000046364	4511	4662	+
ENSMMUG00000016982	BAP1	BRCA1 associated protein-1 (ubiquitin carboxy-terminal hydrolase) [Source:HGNC Symbol;Acc:HGNC:950]	ENSMMUT00000023865	3321	3490	+
ENSMMUG00000000803	STAT2	Signal transducer and activator of transcription 2 isoform 1; Uncharacterized protein; p113 [Source:UniProtKB/TrEMBL;Acc:F6R1P6]	ENSMMUT00000001167	2311	2620	+
ENSMMUG00000020774	SIGMAR1	Uncharacterized protein [Source:UniProtKB/TrEMBL;Acc:F7HC79]	ENSMMUT00000029221	621	930	+
ENSMMUG00000008234	WDR82	Uncharacterized protein; WD repeat-containing protein 82 [Source:UniProtKB/TrEMBL;Acc:F7HSB5]	ENSMMUT00000011508	925	1371	+
ENSMMUG00000000859	SPRYD4	SPRY domain containing 4 [Source:HGNC Symbol;Acc:HGNC:27468]	ENSMMUT00000001227	281	380	+
ENSMMUG00000000860	GLS2	Uncharacterized protein [Source:UniProtKB/TrEMBL;Acc:F6TFZ2]	ENSMMUT00000046354	2381	2570	+
ENSMMUG00000015670	MOV10	Uncharacterized protein [Source:UniProtKB/TrEMBL;Acc:F6R595]	ENSMMUT00000046352	4151	4310	+
ENSMMUG00000019332	BAZ2A	bromodomain adjacent to zinc finger domain, 2A [Source:HGNC Symbol;Acc:HGNC:962]	ENSMMUT00000027154	5831	5960	+
ENSMMUG00000012485	POC1A	Uncharacterized protein [Source:UniProtKB/TrEMBL;Acc:F7FAV6]	ENSMMUT00000017502	1511	1720	+
ENSMMUG00000006171	SLC16A1	Monocarboxylate transporter 1; Uncharacterized protein [Source:UniProtKB/TrEMBL;Acc:F7HQX2]	ENSMMUT00000008638	1671	1880	+
ENSMMUG00000001027		ATP synthase subunit beta [Source:UniProtKB/TrEMBL;Acc:F6SIE0]	ENSMMUT00000001464	1	160	+
ENSMMUG00000019098	LRIG2	leucine-rich repeats and immunoglobulin-like domains 2 [Source:HGNC Symbol;Acc:HGNC:20889]	ENSMMUT00000026841	3541	3680	+
ENSMMUG00000013766	MMU.4022	Prostaglandin E synthase 3; Uncharacterized protein [Source:UniProtKB/TrEMBL;Acc:F6Q847]	ENSMMUT00000019329	601	830	+
ENSMMUG00000005300	DUSP7	Dual specificity protein phosphatase [Source:UniProtKB/TrEMBL;Acc:F7GK32]	ENSMMUT00000007458	1331	1430	+
ENSMMUG00000031826	UBAP1	Ubiquitin-associated protein 1; Ubiquitin-associated protein 1 isoform 1; Uncharacterized protein [Source:UniProtKB/TrEMBL;Acc:F7H7K7]	ENSMMUT00000046343	1061	1250	+
ENSMMUG00000019657	ABHD14B	Macaca mulatta abhydrolase domain containing 14B (ABHD14B), mRNA. [Source:RefSeq mRNA;Acc:NM_001171865]	ENSMMUT00000027612	1161	1367	+
ENSMMUG00000019658	ABHD14A	Abhydrolase domain-containing protein 14A; Uncharacterized protein [Source:UniProtKB/TrEMBL;Acc:F7CNR2]	ENSMMUT00000027618	801	1060	+
ENSMMUG00000017458	DCAF12	DDB1 and CUL4 associated factor 12 [Source:HGNC Symbol;Acc:HGNC:19911]	ENSMMUT00000024551	1621	1720	+
ENSMMUG00000022205	PCBP4	Uncharacterized protein [Source:UniProtKB/TrEMBL;Acc:F6Z9M6]	ENSMMUT00000031236	2081	2230	+
ENSMMUG00000017819	PHTF1	Uncharacterized protein [Source:UniProtKB/TrEMBL;Acc:F7DW84]	ENSMMUT00000046336	1181	1540	+
ENSMMUG00000012597	UBAP2	ubiquitin associated protein 2 [Source:HGNC Symbol;Acc:HGNC:14185]	ENSMMUT00000017667	3191	3310	+
ENSMMUG00000017823	RSBN1	Uncharacterized protein [Source:UniProtKB/TrEMBL;Acc:F7DVS5]	ENSMMUT00000025046	1941	2270	+
ENSMMUG00000019783	TMEM194A	Transmembrane protein 194A; Uncharacterized protein [Source:UniProtKB/TrEMBL;Acc:F7G5G8]	ENSMMUT00000027808	4091	4220	+
ENSMMUG00000006786	PTPN22	Uncharacterized protein [Source:UniProtKB/TrEMBL;Acc:F7H1I7]	ENSMMUT00000046334	1361	1650	+
ENSMMUG00000003644	RRP9	Uncharacterized protein [Source:UniProtKB/TrEMBL;Acc:F6PY48]	ENSMMUT00000005161	5	415	+
ENSMMUG00000017527	STAT6	Signal transducer and activator of transcription 6 isoform 1; Uncharacterized protein [Source:UniProtKB/TrEMBL;Acc:F6UMM2]	ENSMMUT00000024650	3821	3942	+
ENSMMUG00000000389	NOL6	Uncharacterized protein [Source:UniProtKB/TrEMBL;Acc:F6X5R1]	ENSMMUT00000000568	3615	3889	+
ENSMMUG00000019528	AP4B1	adaptor-related protein complex 4, beta 1 subunit [Source:HGNC Symbol;Acc:HGNC:572]	ENSMMUT00000027431	2091	2393	+
ENSMMUG00000012002	RAD54L2	RAD54-like 2 (S. cerevisiae) [Source:HGNC Symbol;Acc:HGNC:29123]	ENSMMUT00000016810	3751	4000	+
ENSMMUG00000021535	HIPK1	homeodomain interacting protein kinase 1 [Source:HGNC Symbol;Acc:HGNC:19006]	ENSMMUT00000030307	5461	5590	+
ENSMMUG00000004280	VPRBP	Vpr (HIV-1) binding protein [Source:HGNC Symbol;Acc:HGNC:30911]	ENSMMUT00000006085	4048	4320	+
ENSMMUG00000004278	MANF	Uncharacterized protein [Source:UniProtKB/TrEMBL;Acc:F6ZSK8]	ENSMMUT00000006082	411	580	+
ENSMMUG00000010495	MAPKAPK3	MAP kinase-activated protein kinase 3; Uncharacterized protein [Source:UniProtKB/TrEMBL;Acc:F7BFL2]	ENSMMUT00000014687	1621	1970	+
ENSMMUG00000020149	CHMP5	Charged multivesicular body protein 5 isoform 1; Chromatin-modifying protein 5; Uncharacterized protein [Source:UniProtKB/TrEMBL;Acc:F6TSB3]	ENSMMUT00000028350	581	860	+
ENSMMUG00000021789	R3HDM2	Uncharacterized protein [Source:UniProtKB/TrEMBL;Acc:F7DE77]	ENSMMUT00000030661	2501	2890	+
ENSMMUG00000010498	HEMK1	HemK methyltransferase family member 1 [Source:HGNC Symbol;Acc:HGNC:24923]	ENSMMUT00000014691	1463	1580	+
ENSMMUG00000014620	TRIM33	Uncharacterized protein [Source:UniProtKB/TrEMBL;Acc:F7GNF8]	ENSMMUT00000020503	3241	3460	+
ENSMMUG00000022060	ARHGAP9	Uncharacterized protein [Source:UniProtKB/TrEMBL;Acc:F7HP48]	ENSMMUT00000031047	2511	2669	+
ENSMMUG00000002088	SMU1	Smu-1 suppressor of mec-8 and unc-52 protein-like protein; Uncharacterized protein; WD40 repeat-containing protein SMU1 [Source:UniProtKB/TrEMBL;Acc:F6WPA8]	ENSMMUT00000002952	921	1060	+
ENSMMUG00000011277	MARS	Uncharacterized protein [Source:UniProtKB/TrEMBL;Acc:F6WA55]	ENSMMUT00000015780	2361	2778	+
ENSMMUG00000007724	APTX	Uncharacterized protein [Source:UniProtKB/TrEMBL;Acc:F7C3I2]	ENSMMUT00000010833	1201	1330	+
ENSMMUG00000001974	CSDE1	Uncharacterized protein [Source:UniProtKB/TrEMBL;Acc:F6VGN9]	ENSMMUT00000002788	1	120	+
ENSMMUG00000007019	CYB561D2	Cytochrome b561 domain-containing protein 2; Uncharacterized protein [Source:UniProtKB/TrEMBL;Acc:F7H9V8]	ENSMMUT00000046307	1220	1480	+
ENSMMUG00000011292	DCTN2	dynactin 2 (p50) [Source:HGNC Symbol;Acc:HGNC:2712]	ENSMMUT00000046301	271	503	+
ENSMMUG00000001973	SIKE1	Uncharacterized protein [Source:UniProtKB/TrEMBL;Acc:F6VGR3]	ENSMMUT00000046304	581	870	+
ENSMMUG00000012442	DDX58	Macaca mulatta DEAD (Asp-Glu-Ala-Asp) box polypeptide 58 (DDX58), mRNA. [Source:RefSeq mRNA;Acc:NM_001042668]	ENSMMUT00000017446	2681	3020	+
ENSMMUG00000020119	IFRD2	Uncharacterized protein [Source:UniProtKB/TrEMBL;Acc:F7GI34]	ENSMMUT00000028306	1831	1945	+
ENSMMUG00000020116	GNAI2	Uncharacterized protein [Source:UniProtKB/TrEMBL;Acc:F7FD32]	ENSMMUT00000028300	1751	1920	+
ENSMMUG00000008151	ATP1A1	Uncharacterized protein [Source:UniProtKB/TrEMBL;Acc:F7HE84]	ENSMMUT00000011389	3361	3647	+
ENSMMUG00000001182	B4GALNT1	Beta-1,4 N-acetylgalactosaminyltransferase 1; Uncharacterized protein [Source:UniProtKB/TrEMBL;Acc:F6R9K4]	ENSMMUT00000001675	4191	4410	+
ENSMMUG00000006074	PLAA	Phospholipase A-2-activating protein; Uncharacterized protein [Source:UniProtKB/TrEMBL;Acc:F6VW58]	ENSMMUT00000008493	2301	2600	+
ENSMMUG00000004921	RBM5	RNA-binding protein 5; Uncharacterized protein [Source:UniProtKB/TrEMBL;Acc:F7CDY6]	ENSMMUT00000006944	1621	1820	+
ENSMMUG00000023690	AGAP2	Arf-GAP with GTPase, ANK repeat and PH domain-containing protein 2 isoform PIKE-S; Uncharacterized protein [Source:UniProtKB/TrEMBL;Acc:F7HCX8]	ENSMMUT00000033343	3511	3686	+
ENSMMUG00000016905	TTF2	transcription termination factor, RNA polymerase II [Source:HGNC Symbol;Acc:HGNC:12398]	ENSMMUT00000023746	1781	1960	+
ENSMMUG00000006073	CAAP1	Uncharacterized protein [Source:UniProtKB/TrEMBL;Acc:F6W2I1]	ENSMMUT00000008491	761	1100	+
ENSMMUG00000023691	TSPAN31	Tetraspanin-31; Uncharacterized protein [Source:UniProtKB/TrEMBL;Acc:F7HCX5]	ENSMMUT00000033346	1011	1136	+
ENSMMUG00000001137	MTAP	S-methyl-5'-thioadenosine phosphorylase [Source:UniProtKB/Swiss-Prot;Acc:F6RQL9]	ENSMMUT00000001605	1321	1500	+
ENSMMUG00000021685	MAN1A2	mannosidase, alpha, class 1A, member 2 [Source:HGNC Symbol;Acc:HGNC:6822]	ENSMMUT00000030511	3091	3210	+
ENSMMUG00000001134		Uncharacterized protein [Source:UniProtKB/TrEMBL;Acc:F6RQN6]	ENSMMUT00000001600	831	984	+
ENSMMUG00000022143	2015-03-09	Uncharacterized protein [Source:UniProtKB/TrEMBL;Acc:F7H3B9]	ENSMMUT00000031146	1771	1989	+
ENSMMUG00000010959	KLHL9	kelch-like family member 9 [Source:HGNC Symbol;Acc:HGNC:18732]	ENSMMUT00000015335	1421	1600	+
ENSMMUG00000004907	FAM46C	Uncharacterized protein [Source:UniProtKB/TrEMBL;Acc:F7CJC7]	ENSMMUT00000006929	1251	1660	+
ENSMMUG00000022148	METTL1	Uncharacterized protein; tRNA (Guanine-N(7)-)-methyltransferase isoform a [Source:UniProtKB/TrEMBL;Acc:F7H363]	ENSMMUT00000031157	851	1170	+
ENSMMUG00000008513	WDR3	Uncharacterized protein [Source:UniProtKB/TrEMBL;Acc:F6WR72]	ENSMMUT00000011907	3331	3433	+
ENSMMUG00000020980	UBA7	Uncharacterized protein [Source:UniProtKB/TrEMBL;Acc:F7HMU1]	ENSMMUT00000029505	991	1110	+
ENSMMUG00000019070	FOCAD	focadhesin [Source:HGNC Symbol;Acc:HGNC:23377]	ENSMMUT00000012459	5321	5674	+
ENSMMUG00000005893	TSFM	Elongation factor Ts, mitochondrial [Source:UniProtKB/TrEMBL;Acc:F6TKZ4]	ENSMMUT00000046256	927	1170	+
ENSMMUG00000014589	IP6K1	Inositol hexakisphosphate kinase 1 isoform 1; Uncharacterized protein [Source:UniProtKB/TrEMBL;Acc:F7GRE2]	ENSMMUT00000020464	4101	4200	+
ENSMMUG00000014584	GMPPB	Mannose-1-phosphate guanyltransferase beta isoform 2; Uncharacterized protein [Source:UniProtKB/TrEMBL;Acc:F7GRE3]	ENSMMUT00000020460	1421	1630	+
ENSMMUG00000005321	CTDSP2	CTD (carboxy-terminal domain, RNA polymerase II, polypeptide A) small phosphatase 2 [Source:HGNC Symbol;Acc:HGNC:17077]	ENSMMUT00000007489	3401	3550	+
ENSMMUG00000022929	GEMIN7	gem (nuclear organelle) associated protein 7 [Source:HGNC Symbol;Acc:HGNC:20045]	ENSMMUT00000032273	271	390	+
ENSMMUG00000019218	XRCC6BP1	Uncharacterized protein [Source:UniProtKB/TrEMBL;Acc:F6QPF2]	ENSMMUT00000026995	470	640	+
ENSMMUG00000009260	WARS2	tryptophanyl tRNA synthetase 2, mitochondrial [Source:HGNC Symbol;Acc:HGNC:12730]	ENSMMUT00000012941	741	970	+
ENSMMUG00000003412			ENSMMUT00000004827	1101	1273	+
ENSMMUG00000000955	USP15	Ubiquitin carboxyl-terminal hydrolase [Source:UniProtKB/TrEMBL;Acc:F6QY38]	ENSMMUT00000001366	2711	3036	+
ENSMMUG00000004338	DENND4C	DENN/MADD domain containing 4C [Source:HGNC Symbol;Acc:HGNC:26079]	ENSMMUT00000046240	4891	5070	+
ENSMMUG00000023089	PHGDH	phosphoglycerate dehydrogenase [Source:HGNC Symbol;Acc:HGNC:8923]	ENSMMUT00000046237	3061	3170	+
ENSMMUG00000000956	MON2	MON2 homolog (S. cerevisiae) [Source:HGNC Symbol;Acc:HGNC:29177]	ENSMMUT00000001368	4551	4660	+
ENSMMUG00000018396	HAUS6	Uncharacterized protein [Source:UniProtKB/TrEMBL;Acc:F7GZC3]	ENSMMUT00000025855	2961	3260	+
ENSMMUG00000011561	TMEM5	transmembrane protein 5 [Source:HGNC Symbol;Acc:HGNC:13530]	ENSMMUT00000016189	1271	1428	+
ENSMMUG00000018395	RRAGA	Uncharacterized protein [Source:UniProtKB/TrEMBL;Acc:F7GZF7]	ENSMMUT00000025851	141	420	+
ENSMMUG00000001955	C11H12ORF66	Uncharacterized protein [Source:UniProtKB/TrEMBL;Acc:F6VH90]	ENSMMUT00000002768	1171	1440	+
ENSMMUG00000018375	NOTCH2	Uncharacterized protein [Source:UniProtKB/TrEMBL;Acc:F7DFJ1]	ENSMMUT00000025824	7634	8070	+
ENSMMUG00000014540	APEH	Acylamino-acid-releasing enzyme; Uncharacterized protein [Source:UniProtKB/TrEMBL;Acc:F7G744]	ENSMMUT00000020403	2629	2778	+
ENSMMUG00000007659	XPOT	exportin, tRNA [Source:HGNC Symbol;Acc:HGNC:12826]	ENSMMUT00000046231	2031	2240	+
ENSMMUG00000004683	DAG1	Dystroglycan preproprotein; Uncharacterized protein [Source:UniProtKB/TrEMBL;Acc:F6RU72]	ENSMMUT00000006615	3311	3480	+
ENSMMUG00000031780	NICN1	Nicolin-1; Uncharacterized protein [Source:UniProtKB/TrEMBL;Acc:F7G5R2]	ENSMMUT00000046228	1231	1480	+
ENSMMUG00000007658	TBK1	Serine/threonine-protein kinase TBK1; Uncharacterized protein [Source:UniProtKB/TrEMBL;Acc:F7DBZ3]	ENSMMUT00000010727	1671	1880	+
ENSMMUG00000031778		Uncharacterized protein [Source:UniProtKB/TrEMBL;Acc:F6VZC4]	ENSMMUT00000015968	261	370	+
ENSMMUG00000019640	GPR89B	Golgi pH regulator B; Uncharacterized protein [Source:UniProtKB/TrEMBL;Acc:F7D013]	ENSMMUT00000027588	1403	1633	+
ENSMMUG00000012963	GPX1	Macaca mulatta glutathione peroxidase 1 (GPX1), mRNA. [Source:RefSeq mRNA;Acc:NM_001159298]	ENSMMUT00000018173	737	850	+
ENSMMUG00000000822	USP4	ubiquitin specific peptidase 4 (proto-oncogene) [Source:HGNC Symbol;Acc:HGNC:12627]	ENSMMUT00000001187	2821	2990	+
ENSMMUG00000023229	RASSF3	Uncharacterized protein [Source:UniProtKB/TrEMBL;Acc:F7E6U8]	ENSMMUT00000032674	501	600	+
ENSMMUG00000006481	GNS	N-acetylglucosamine-6-sulfatase; Uncharacterized protein [Source:UniProtKB/TrEMBL;Acc:F7HBI0]	ENSMMUT00000009088	1843	2110	+
ENSMMUG00000016736	RNF115	Uncharacterized protein [Source:UniProtKB/TrEMBL;Acc:F6V5Y8]	ENSMMUT00000023511	962	1210	+
ENSMMUG00000016892	LEMD3	Inner nuclear membrane protein Man1 isoform 1; Uncharacterized protein [Source:UniProtKB/TrEMBL;Acc:F7CQM6]	ENSMMUT00000023726	2601	2760	+
ENSMMUG00000002833	KLHDC8B	Uncharacterized protein [Source:UniProtKB/TrEMBL;Acc:F7H011]	ENSMMUT00000004012	1701	1935	+
ENSMMUG00000016621	TMBIM4	Uncharacterized protein [Source:UniProtKB/TrEMBL;Acc:F6TPJ2]	ENSMMUT00000023356	581	864	+
ENSMMUG00000002948	USP19	ubiquitin specific peptidase 19 [Source:HGNC Symbol;Acc:HGNC:12617]	ENSMMUT00000004176	2975	3080	+
ENSMMUG00000002943	QARS	Glutaminyl-tRNA synthetase; Uncharacterized protein [Source:UniProtKB/TrEMBL;Acc:F7GZY5]	ENSMMUT00000004172	1301	1460	+
ENSMMUG00000031768	RPL17	ribosomal protein L17 [Source:HGNC Symbol;Acc:HGNC:10307]	ENSMMUT00000046206	411	510	+
ENSMMUG00000008300	CAND1	Cullin-associated NEDD8-dissociated protein 1; Cullin-associated and neddylation-dissociated protein 1; Uncharacterized protein [Source:UniProtKB/TrEMBL;Acc:F7H6Z9]	ENSMMUT00000011609	3925	4146	+
ENSMMUG00000005656	IMPDH2	Inosine-5'-monophosphate dehydrogenase [Source:UniProtKB/TrEMBL;Acc:F6VXT4]	ENSMMUT00000007958	511	780	+
ENSMMUG00000011650	DYRK2	Uncharacterized protein [Source:UniProtKB/TrEMBL;Acc:F6PSZ0]	ENSMMUT00000016324	1781	2030	+
ENSMMUG00000019225	IFNG	Macaca mulatta interferon-gamma (IFNG), mRNA. [Source:RefSeq mRNA;Acc:NM_001032905]	ENSMMUT00000027007	311	580	+
ENSMMUG00000002920		Uncharacterized protein [Source:UniProtKB/TrEMBL;Acc:F6PTJ8]	ENSMMUT00000004143	411	519	+
ENSMMUG00000005649	WDR6	Uncharacterized protein [Source:UniProtKB/TrEMBL;Acc:F6W4V1]	ENSMMUT00000007942	2171	2370	+
ENSMMUG00000018725	MDM1	Uncharacterized protein [Source:UniProtKB/TrEMBL;Acc:F6YB04]	ENSMMUT00000026320	1391	1606	+
ENSMMUG00000016051	RBM8A	RNA binding motif protein 8A [Source:HGNC Symbol;Acc:HGNC:9905]	ENSMMUT00000022572	41	160	+
ENSMMUG00000015418	SLC25A20	Uncharacterized protein [Source:UniProtKB/TrEMBL;Acc:F6PTP5]	ENSMMUT00000021620	1461	1630	+
ENSMMUG00000011442	RAP1B	Ras-related protein Rap-1b; Ras-related protein Rap-1b isoform 1; Uncharacterized protein [Source:UniProtKB/TrEMBL;Acc:F7B9T3]	ENSMMUT00000016016	931	1060	+
ENSMMUG00000016738	POLR3GL	DNA-directed RNA polymerase III subunit RPC7-like; Uncharacterized protein [Source:UniProtKB/TrEMBL;Acc:F6V5W7]	ENSMMUT00000023513	511	790	+
ENSMMUG00000014186	NUP107	Uncharacterized protein [Source:UniProtKB/TrEMBL;Acc:F7AS65]	ENSMMUT00000019904	2551	2650	+
ENSMMUG00000019570			ENSMMUT00000027488	901	1036	+
ENSMMUG00000016624	TMEM261	transmembrane protein 261 [Source:HGNC Symbol;Acc:HGNC:30536]	ENSMMUT00000023359	421	580	+
ENSMMUG00000014720	NCKIPSD	Uncharacterized protein [Source:UniProtKB/TrEMBL;Acc:F7GBC7]	ENSMMUT00000020647	731	1130	+
ENSMMUG00000015985			ENSMMUT00000022476	1951	2090	+
ENSMMUG00000031754	SLC26A6	Uncharacterized protein [Source:UniProtKB/TrEMBL;Acc:F6PIY5]	ENSMMUT00000020622	2561	2710	+
ENSMMUG00000009024	CHD1L	chromodomain helicase DNA binding protein 1-like [Source:HGNC Symbol;Acc:HGNC:1916]	ENSMMUT00000012616	1471	1663	+
ENSMMUG00000014193	MDM2	Uncharacterized protein [Source:UniProtKB/TrEMBL;Acc:F7AJY5]	ENSMMUT00000019920	1021	1400	+
ENSMMUG00000011603	RANBP6	RAN binding protein 6 [Source:HGNC Symbol;Acc:HGNC:9851]	ENSMMUT00000016259	1141	1400	+
ENSMMUG00000014705	UQCRC1	Macaca mulatta ubiquinol-cytochrome c reductase core protein I (UQCRC1), mRNA. [Source:RefSeq mRNA;Acc:NM_001040119]	ENSMMUT00000020619	1470	1590	+
ENSMMUG00000005469	ERMP1	endoplasmic reticulum metallopeptidase 1 [Source:HGNC Symbol;Acc:HGNC:23703]	ENSMMUT00000007705	331	570	+
ENSMMUG00000009020	KIAA1432	Uncharacterized protein [Source:UniProtKB/TrEMBL;Acc:F7FH62]	ENSMMUT00000012605	2074	2468	+
ENSMMUG00000002921	CPSF6	Cleavage and polyadenylation specificity factor subunit 6; Uncharacterized protein [Source:UniProtKB/TrEMBL;Acc:F7H1Q9]	ENSMMUT00000004145	1831	1970	+
ENSMMUG00000016786	BCL9	B-cell CLL/lymphoma 9 protein; Uncharacterized protein [Source:UniProtKB/TrEMBL;Acc:F7D4Z2]	ENSMMUT00000023584	5081	5220	+
ENSMMUG00000012235	CD274	Macaca mulatta CD274 molecule (CD274), mRNA. [Source:RefSeq mRNA;Acc:NM_001083889]	ENSMMUT00000017136	981	1150	+
ENSMMUG00000006197	PLGRKT	Transmembrane protein C9orf46; Uncharacterized protein [Source:UniProtKB/TrEMBL;Acc:F7HNT6]	ENSMMUT00000008670	501	680	+
ENSMMUG00000010820	CCT2	Uncharacterized protein [Source:UniProtKB/TrEMBL;Acc:F6PJP5]	ENSMMUT00000015131	731	941	+
ENSMMUG00000006196			ENSMMUT00000008668	529	680	+
ENSMMUG00000014558	JAK2	Tyrosine-protein kinase [Source:UniProtKB/TrEMBL;Acc:F7GT47]	ENSMMUT00000020426	3081	3590	+
ENSMMUG00000000502			ENSMMUT00000000738	982	1180	+
ENSMMUG00000006716	RCL1	Uncharacterized protein [Source:UniProtKB/TrEMBL;Acc:F7BDP3]	ENSMMUT00000009404	1151	1446	+
ENSMMUG00000000143	AK3	GTP:AMP phosphotransferase, mitochondrial isoform a; Uncharacterized protein [Source:UniProtKB/TrEMBL;Acc:F7H3S6]	ENSMMUT00000000204	1981	2112	+
ENSMMUG00000000141	CDC37L1	Hsp90 co-chaperone Cdc37-like 1; Hsp90-associating relative of Cdc37; Uncharacterized protein [Source:UniProtKB/TrEMBL;Acc:F7BDY8]	ENSMMUT00000046145	1131	1340	+
ENSMMUG00000014853	CNOT2	CCR4-NOT transcription complex subunit 2; CCR4-associated factor 2; Uncharacterized protein [Source:UniProtKB/TrEMBL;Acc:F7BE69]	ENSMMUT00000046139	2191	2380	+
ENSMMUG00000007244	OTUD7B	OTU domain-containing protein 7B; Uncharacterized protein [Source:UniProtKB/TrEMBL;Acc:F7BEE5]	ENSMMUT00000046131	2611	2830	+
ENSMMUG00000002362	KIAA0020	KIAA0020 [Source:HGNC Symbol;Acc:HGNC:29676]	ENSMMUT00000003348	1	160	+
ENSMMUG00000003078	NME6	NME/NM23 nucleoside diphosphate kinase 6 [Source:HGNC Symbol;Acc:HGNC:20567]	ENSMMUT00000004358	461	570	+
ENSMMUG00000013681	PLEKHO1	Uncharacterized protein [Source:UniProtKB/TrEMBL;Acc:F7BER0]	ENSMMUT00000019215	1191	1410	+
ENSMMUG00000003823	MAP4	microtubule-associated protein 4 [Source:HGNC Symbol;Acc:HGNC:6862]	ENSMMUT00000005407	581	770	+
ENSMMUG00000021531	ANP32E	acidic (leucine-rich) nuclear phosphoprotein 32 family, member E [Source:HGNC Symbol;Acc:HGNC:16673]	ENSMMUT00000017513	2321	2460	+
ENSMMUG00000015279	SMARCA2	Uncharacterized protein [Source:UniProtKB/TrEMBL;Acc:F7BEV7]	ENSMMUT00000021425	3461	3670	+
ENSMMUG00000003820	DHX30	Uncharacterized protein [Source:UniProtKB/TrEMBL;Acc:F7HRB8]	ENSMMUT00000005402	1301	2060	+
ENSMMUG00000021386	APH1A	Uncharacterized protein [Source:UniProtKB/TrEMBL;Acc:F7FDJ2]	ENSMMUT00000030104	891	1100	+
ENSMMUG00000020943	ZFC3H1	zinc finger, C3H1-type containing [Source:HGNC Symbol;Acc:HGNC:28328]	ENSMMUT00000029452	6781	6880	+
ENSMMUG00000009345	SMARCC1	Uncharacterized protein [Source:UniProtKB/TrEMBL;Acc:F7HJG9]	ENSMMUT00000013058	2321	2480	+
ENSMMUG00000013385	C3ORF75	Uncharacterized protein [Source:UniProtKB/TrEMBL;Acc:F7AB69]	ENSMMUT00000018775	691	890	+
ENSMMUG00000014046	SCAP	SREBF chaperone [Source:HGNC Symbol;Acc:HGNC:30634]	ENSMMUT00000019716	3715	3921	+
ENSMMUG00000016976	DOCK8	Uncharacterized protein [Source:UniProtKB/TrEMBL;Acc:F7AZW3]	ENSMMUT00000023857	6171	6740	+
ENSMMUG00000020948	TMEM19	Transmembrane protein 19; Uncharacterized protein [Source:UniProtKB/TrEMBL;Acc:F7H2C0]	ENSMMUT00000029459	1281	1473	+
ENSMMUG00000007727	TBC1D15	TBC1 domain family, member 15 [Source:HGNC Symbol;Acc:HGNC:25694]	ENSMMUT00000010816	881	1250	+
ENSMMUG00000006256	TARS2	threonyl-tRNA synthetase 2, mitochondrial (putative) [Source:HGNC Symbol;Acc:HGNC:30740]	ENSMMUT00000008757	1991	2260	+
ENSMMUG00000014045	PTPN23	protein tyrosine phosphatase, non-receptor type 23 [Source:HGNC Symbol;Acc:HGNC:14406]	ENSMMUT00000019713	4821	5030	+
ENSMMUG00000006454	KLHL18	kelch-like family member 18 [Source:HGNC Symbol;Acc:HGNC:29120]	ENSMMUT00000009050	3151	3310	+
ENSMMUG00000021117	SETD2	Uncharacterized protein [Source:UniProtKB/TrEMBL;Acc:F7HU59]	ENSMMUT00000029698	4931	5080	+
ENSMMUG00000009638	GLIPR1	Glioma pathogenesis-related protein 1; Uncharacterized protein [Source:UniProtKB/TrEMBL;Acc:F6YQN5]	ENSMMUT00000013458	281	530	+
ENSMMUG00000009640	KRR1	KRR1 small subunit processome component [Source:UniProtKB/TrEMBL;Acc:F6YQM6]	ENSMMUT00000013459	1021	1220	+
ENSMMUG00000008221	MCL1	Induced myeloid leukemia cell differentiation protein Mcl-1 isoform 1; Uncharacterized protein [Source:UniProtKB/TrEMBL;Acc:F7HUE9]	ENSMMUT00000011489	691	1290	+
ENSMMUG00000010668	GOLPH3L	Golgi phosphoprotein 3-like; Uncharacterized protein [Source:UniProtKB/TrEMBL;Acc:F7B4L7]	ENSMMUT00000014918	821	970	+
ENSMMUG00000011856		Uncharacterized protein [Source:UniProtKB/TrEMBL;Acc:F7BLR5]	ENSMMUT00000016606	791	895	+
ENSMMUG00000015583		Uncharacterized protein [Source:UniProtKB/TrEMBL;Acc:F6TEK2]	ENSMMUT00000046092	1031	1187	+
ENSMMUG00000019813	NBEAL2	Uncharacterized protein [Source:UniProtKB/TrEMBL;Acc:F7BMD6]	ENSMMUT00000027846	5231	5330	+
ENSMMUG00000000541	ARNT	aryl hydrocarbon receptor nuclear translocator [Source:HGNC Symbol;Acc:HGNC:700]	ENSMMUT00000000789	391	490	+
ENSMMUG00000017862	BBS10	Bardet-Biedl syndrome 10 [Source:HGNC Symbol;Acc:HGNC:26291]	ENSMMUT00000025102	321	610	+
ENSMMUG00000017864	OSBPL8	Oxysterol-binding protein [Source:UniProtKB/TrEMBL;Acc:F7DPV1]	ENSMMUT00000025106	2413	3397	+
ENSMMUG00000023235	SETDB1	SET domain, bifurcated 1 [Source:HGNC Symbol;Acc:HGNC:10761]	ENSMMUT00000032683	2681	3170	+
ENSMMUG00000023234	LASS2	Uncharacterized protein [Source:UniProtKB/TrEMBL;Acc:F7BTC4]	ENSMMUT00000032680	1211	1454	+
ENSMMUG00000012603	FAM122A	Protein FAM122A; Putative uncharacterized protein FAM122A; Uncharacterized protein [Source:UniProtKB/TrEMBL;Acc:F7F9H1]	ENSMMUT00000017668	901	1090	+
ENSMMUG00000010068	PRUNE	Uncharacterized protein [Source:UniProtKB/TrEMBL;Acc:F6T7H8]	ENSMMUT00000014058	1201	1658	+
ENSMMUG00000002130	SACM1L	Uncharacterized protein [Source:UniProtKB/TrEMBL;Acc:F6UPL3]	ENSMMUT00000046057	2391	2496	+
ENSMMUG00000010074	CDC42SE1	CDC42 small effector protein 1; Uncharacterized protein [Source:UniProtKB/TrEMBL;Acc:F6T0R1]	ENSMMUT00000014064	341	570	+
ENSMMUG00000008346	SMC5	structural maintenance of chromosomes 5 [Source:HGNC Symbol;Acc:HGNC:20465]	ENSMMUT00000011671	951	1130	+
ENSMMUG00000010711	LIMD1	LIM domains containing 1 [Source:HGNC Symbol;Acc:HGNC:6612]	ENSMMUT00000014982	371	540	+
ENSMMUG00000018020	LARS2	leucyl-tRNA synthetase 2, mitochondrial [Source:HGNC Symbol;Acc:HGNC:17095]	ENSMMUT00000025310	2681	3240	+
ENSMMUG00000007898	LYSMD1	LysM and putative peptidoglycan-binding domain-containing protein 1 isoform a; Uncharacterized protein [Source:UniProtKB/TrEMBL;Acc:F7AZF7]	ENSMMUT00000011059	1211	1380	+
ENSMMUG00000019130	EXOSC7	Exosome complex component RRP42; Uncharacterized protein [Source:UniProtKB/TrEMBL;Acc:F6T0A2]	ENSMMUT00000046049	821	1059	+
ENSMMUG00000019214	PPP1R12A	Uncharacterized protein [Source:UniProtKB/TrEMBL;Acc:F6QPC9]	ENSMMUT00000026990	3031	3360	+
ENSMMUG00000019740	ZDHHC3	Palmitoyltransferase ZDHHC3 isoform 1; Uncharacterized protein [Source:UniProtKB/TrEMBL;Acc:F7AYQ9]	ENSMMUT00000027743	1441	1900	+
ENSMMUG00000005228	PSMD4	Macaca mulatta proteasome (prosome, macropain) 26S subunit, non-ATPase, 4 (PSMD4), mRNA. [Source:RefSeq mRNA;Acc:NM_001136568]	ENSMMUT00000046046	2521	2699	+
ENSMMUG00000013166	ZNF687	Uncharacterized protein [Source:UniProtKB/TrEMBL;Acc:F6Z211]	ENSMMUT00000046043	1431	1640	+
ENSMMUG00000003650	TMEM42	Transmembrane protein 42; Uncharacterized protein [Source:UniProtKB/TrEMBL;Acc:F6PXS8]	ENSMMUT00000005166	441	720	+
ENSMMUG00000013170	PI4KB	Uncharacterized protein [Source:UniProtKB/TrEMBL;Acc:F6XXW9]	ENSMMUT00000018476	621	1360	+
ENSMMUG00000013172	RFX5	DNA-binding protein RFX5; Uncharacterized protein [Source:UniProtKB/TrEMBL;Acc:F6XXU4]	ENSMMUT00000018478	1301	1480	+
ENSMMUG00000020924	PSMB4	Proteasome subunit beta type [Source:UniProtKB/TrEMBL;Acc:F7H4P3]	ENSMMUT00000029425	12	210	+
ENSMMUG00000019196	GDA	Uncharacterized protein [Source:UniProtKB/TrEMBL;Acc:F7CWR5]	ENSMMUT00000046029	3931	4141	+
ENSMMUG00000020925	POGZ	Pogo transposable element with ZNF domain isoform 1; Uncharacterized protein [Source:UniProtKB/TrEMBL;Acc:F7H4N3]	ENSMMUT00000029430	5921	6060	+
ENSMMUG00000023124	TMEM43	transmembrane protein 43 [Source:HGNC Symbol;Acc:HGNC:28472]	ENSMMUT00000046004	301	500	+
ENSMMUG00000012667	ANXA1	Annexin [Source:UniProtKB/TrEMBL;Acc:F7D2H1]	ENSMMUT00000045992	833	990	+
ENSMMUG00000001029	ANO10	anoctamin 10 [Source:HGNC Symbol;Acc:HGNC:25519]	ENSMMUT00000001467	871	1080	+
ENSMMUG00000009094	MRPL9	Uncharacterized protein [Source:UniProtKB/TrEMBL;Acc:F7D2B2]	ENSMMUT00000012723	1031	1140	+
ENSMMUG00000006340	SLC6A6	Transporter [Source:UniProtKB/TrEMBL;Acc:F7D2B9]	ENSMMUT00000008890	1991	2120	+
ENSMMUG00000014780	C3orf20	chromosome 3 open reading frame 20 [Source:HGNC Symbol;Acc:HGNC:25320]	ENSMMUT00000045987	3171	3270	+
ENSMMUG00000021242	NKTR	natural killer cell triggering receptor [Source:HGNC Symbol;Acc:HGNC:7833]	ENSMMUT00000029888	2601	2790	+
ENSMMUG00000005156	NR2C2	nuclear receptor subfamily 2, group C, member 2 [Source:HGNC Symbol;Acc:HGNC:7972]	ENSMMUT00000007264	1591	1840	+
ENSMMUG00000010399	C9ORF41	Uncharacterized protein [Source:UniProtKB/TrEMBL;Acc:F7D3X5]	ENSMMUT00000014550	231	520	+
ENSMMUG00000016793	TMCC1	Uncharacterized protein [Source:UniProtKB/TrEMBL;Acc:F7CZG9]	ENSMMUT00000016380	1121	1300	+
ENSMMUG00000001075		Uncharacterized protein [Source:UniProtKB/TrEMBL;Acc:F6QMK0]	ENSMMUT00000001528	2141	2430	+
ENSMMUG00000014627	CTNNB1	Uncharacterized protein [Source:UniProtKB/TrEMBL;Acc:F6VB10]	ENSMMUT00000020513	2864	3154	+
ENSMMUG00000019754	VPS13A	Uncharacterized protein [Source:UniProtKB/TrEMBL;Acc:F6VC84]	ENSMMUT00000027775	9471	9635	+
ENSMMUG00000010979	S100A4	Uncharacterized protein [Source:UniProtKB/TrEMBL;Acc:F7GDB8]	ENSMMUT00000045948	71	180	+
ENSMMUG00000022965		Uncharacterized protein [Source:UniProtKB/TrEMBL;Acc:F6U6B5]	ENSMMUT00000032328	681	810	+
ENSMMUG00000008148	SNAPIN	SNARE-associated protein Snapin; Uncharacterized protein [Source:UniProtKB/TrEMBL;Acc:F7HGD6]	ENSMMUT00000011382	411	630	+
ENSMMUG00000008149	ILF2	Uncharacterized protein [Source:UniProtKB/TrEMBL;Acc:F7HE92]	ENSMMUT00000011384	1066	1320	+
ENSMMUG00000013171	H1FX	Histone H1x; Uncharacterized protein [Source:UniProtKB/TrEMBL;Acc:F6Z1X9]	ENSMMUT00000018474	861	980	+
ENSMMUG00000013167	C11H3ORF37	Uncharacterized protein [Source:UniProtKB/TrEMBL;Acc:F6Z1Y7]	ENSMMUT00000018473	1181	1480	+
ENSMMUG00000022963	SLC25A38	Uncharacterized protein [Source:UniProtKB/TrEMBL;Acc:F6U6E7]	ENSMMUT00000032324	561	690	+
ENSMMUG00000011585	CNBP	Cellular nucleic acid-binding protein isoform 3; Uncharacterized protein [Source:UniProtKB/TrEMBL;Acc:F6PPB3]	ENSMMUT00000016234	1451	1600	+
ENSMMUG00000020147	CSRNP1	Uncharacterized protein [Source:UniProtKB/TrEMBL;Acc:F6TYP2]	ENSMMUT00000028348	1871	2060	+
ENSMMUG00000011868	PSAT1	Uncharacterized protein [Source:UniProtKB/TrEMBL;Acc:F7H2J6]	ENSMMUT00000016628	1191	1440	+
ENSMMUG00000006338	ACAD9	Uncharacterized protein [Source:UniProtKB/TrEMBL;Acc:F7HE77]	ENSMMUT00000008889	2053	2320	+
ENSMMUG00000019482	INTS3	Uncharacterized protein [Source:UniProtKB/TrEMBL;Acc:F7D405]	ENSMMUT00000027376	3551	3730	+
ENSMMUG00000023365	TLE4	transducin-like enhancer of split 4 [Source:HGNC Symbol;Acc:HGNC:11840]	ENSMMUT00000006540	3061	3260	+
ENSMMUG00000020138	WDR48	Uncharacterized protein [Source:UniProtKB/TrEMBL;Acc:F6TZL8]	ENSMMUT00000028339	2051	2460	+
ENSMMUG00000018663	EEFSEC	eukaryotic elongation factor, selenocysteine-tRNA-specific [Source:HGNC Symbol;Acc:HGNC:24614]	ENSMMUT00000026235	1001	1350	+
ENSMMUG00000018662	RUVBL1	Uncharacterized protein [Source:UniProtKB/TrEMBL;Acc:F6VIT7]	ENSMMUT00000045922	861	1130	+
ENSMMUG00000018661	SEC61A1	Sec61 alpha 1 subunit (S. cerevisiae) [Source:HGNC Symbol;Acc:HGNC:18276]	ENSMMUT00000026233	2981	3190	+
ENSMMUG00000002696	GATAD2B	GATA zinc finger domain containing 2B [Source:HGNC Symbol;Acc:HGNC:30778]	ENSMMUT00000003838	101	295	+
ENSMMUG00000019931	UBQLN1	ubiquilin 1 [Source:HGNC Symbol;Acc:HGNC:12508]	ENSMMUT00000027997	311	538	+
ENSMMUG00000005002	DENND4B	DENN/MADD domain containing 4B [Source:HGNC Symbol;Acc:HGNC:29044]	ENSMMUT00000007052	4491	4810	+
ENSMMUG00000018792	EXOG	endo/exonuclease (5'-3'), endonuclease G-like [Source:HGNC Symbol;Acc:HGNC:3347]	ENSMMUT00000026426	721	1080	+
ENSMMUG00000005005	CRTC2	Uncharacterized protein [Source:UniProtKB/TrEMBL;Acc:F6VJE1]	ENSMMUT00000007054	1151	1390	+
ENSMMUG00000000166	ABTB1	Uncharacterized protein [Source:UniProtKB/TrEMBL;Acc:F7HLS9]	ENSMMUT00000000243	1251	1470	+
ENSMMUG00000005007	SLC39A1	Uncharacterized protein; Zinc transporter ZIP1 [Source:UniProtKB/TrEMBL;Acc:F7AMB0]	ENSMMUT00000007057	951	1120	+
ENSMMUG00000018870	C15H9ORF64	Uncharacterized protein [Source:UniProtKB/TrEMBL;Acc:F6WZW8]	ENSMMUT00000026527	861	1020	+
ENSMMUG00000018871	HNRNPK	Heterogeneous nuclear ribonucleoprotein K isoform b; Uncharacterized protein [Source:UniProtKB/TrEMBL;Acc:F6VJH6]	ENSMMUT00000026533	221	380	+
ENSMMUG00000005008	CREB3L4	Cyclic AMP-responsive element-binding protein 3-like protein 4; Uncharacterized protein [Source:UniProtKB/TrEMBL;Acc:F6VJI3]	ENSMMUT00000007060	1311	1460	+
ENSMMUG00000000996	OXSR1	Serine/threonine-protein kinase OSR1; Uncharacterized protein [Source:UniProtKB/TrEMBL;Acc:F6SQU7]	ENSMMUT00000001423	811	1060	+
ENSMMUG00000000158	MCM2	minichromosome maintenance complex component 2 [Source:HGNC Symbol;Acc:HGNC:6944]	ENSMMUT00000000234	2671	2940	+
ENSMMUG00000005010	JTB	jumping translocation breakpoint [Source:HGNC Symbol;Acc:HGNC:6201]	ENSMMUT00000007064	851	981	+
ENSMMUG00000000756	TPRA1	Uncharacterized protein [Source:UniProtKB/TrEMBL;Acc:F6RK16]	ENSMMUT00000001090	1241	1560	+
ENSMMUG00000000995	MYD88	Macaca mulatta myeloid differentiation primary response gene (88) (MYD88), mRNA. [Source:RefSeq mRNA;Acc:NM_001130681]	ENSMMUT00000001422	841	1040	+
ENSMMUG00000000990	ACAA1	Uncharacterized protein [Source:UniProtKB/TrEMBL;Acc:F6SR59]	ENSMMUT00000001420	1481	1761	+
ENSMMUG00000010805	TPM3	tropomyosin 3 [Source:HGNC Symbol;Acc:HGNC:12012]	ENSMMUT00000015105	565	840	+
ENSMMUG00000015864	TMTC3	transmembrane and tetratricopeptide repeat containing 3 [Source:HGNC Symbol;Acc:HGNC:26899]	ENSMMUT00000045898	2511	2825	+
ENSMMUG00000001275			ENSMMUT00000001807	471	804	+
ENSMMUG00000010808	C1orf43	chromosome 1 open reading frame 43 [Source:HGNC Symbol;Acc:HGNC:29876]	ENSMMUT00000015112	721	1100	+
ENSMMUG00000010810	UBAP2L	Ubiquitin-associated protein 2-like isoform b; Uncharacterized protein [Source:UniProtKB/TrEMBL;Acc:F6VRQ3]	ENSMMUT00000015117	1801	1930	+
ENSMMUG00000003574	POC1B	Uncharacterized protein [Source:UniProtKB/TrEMBL;Acc:F6VRP4]	ENSMMUT00000005055	1581	1830	+
ENSMMUG00000003399	ISCA1	Iron-sulfur cluster assembly 1 homolog, mitochondrial; Uncharacterized protein [Source:UniProtKB/TrEMBL;Acc:F7FEI1]	ENSMMUT00000004809	741	890	+
ENSMMUG00000003401	ZCCHC6	zinc finger, CCHC domain containing 6 [Source:HGNC Symbol;Acc:HGNC:25817]	ENSMMUT00000004824	4341	4590	+
ENSMMUG00000023364	ATP8B2	ATPase, aminophospholipid transporter, class I, type 8B, member 2 [Source:HGNC Symbol;Acc:HGNC:13534]	ENSMMUT00000032874	3529	3950	+
ENSMMUG00000017053	DAPK1	Death-associated protein kinase 1; Uncharacterized protein [Source:UniProtKB/TrEMBL;Acc:F7HLL1]	ENSMMUT00000023978	4641	4860	+
ENSMMUG00000021927	ITGA9	Uncharacterized protein [Source:UniProtKB/TrEMBL;Acc:F6T4B4]	ENSMMUT00000030850	3051	3248	+
ENSMMUG00000017609	CTSL	cathepsin L [Source:HGNC Symbol;Acc:HGNC:2537]	ENSMMUT00000024761	1191	1451	+
ENSMMUG00000021918	GOLGA4	golgin A4 [Source:HGNC Symbol;Acc:HGNC:4427]	ENSMMUT00000030841	6561	6670	+
ENSMMUG00000022978	IL6R	Uncharacterized protein [Source:UniProtKB/TrEMBL;Acc:F6U605]	ENSMMUT00000032343	1511	1760	+
ENSMMUG00000019547	UBE2Q1	ubiquitin-conjugating enzyme E2Q family member 1 [Source:HGNC Symbol;Acc:HGNC:15698]	ENSMMUT00000027456	1171	1517	+
ENSMMUG00000016093	ADAR	Uncharacterized protein [Source:UniProtKB/TrEMBL;Acc:F7GLF8]	ENSMMUT00000022629	3611	3862	+
ENSMMUG00000009555	BTG1	Protein BTG1; Uncharacterized protein [Source:UniProtKB/TrEMBL;Acc:F6Y7P5]	ENSMMUT00000013333	491	840	+
ENSMMUG00000006816	TRANK1	Uncharacterized protein [Source:UniProtKB/TrEMBL;Acc:F7GZE9]	ENSMMUT00000009534	1841	1940	+
ENSMMUG00000017793	KCNN3	potassium intermediate/small conductance calcium-activated channel, subfamily N, member 3 [Source:HGNC Symbol;Acc:HGNC:6292]	ENSMMUT00000025006	661	970	+
ENSMMUG00000012534	CKS2	Cyclin-dependent kinases regulatory subunit 2; Uncharacterized protein [Source:UniProtKB/TrEMBL;Acc:F7E906]	ENSMMUT00000017570	1	100	+
ENSMMUG00000016804	NUDT4	Uncharacterized protein [Source:UniProtKB/TrEMBL;Acc:F7CYP9]	ENSMMUT00000023608	391	630	+
ENSMMUG00000002027	PMVK	phosphomevalonate kinase [Source:HGNC Symbol;Acc:HGNC:9141]	ENSMMUT00000002868	811	960	+
ENSMMUG00000006576	PBXIP1	pre-B-cell leukemia homeobox interacting protein 1 [Source:HGNC Symbol;Acc:HGNC:21199]	ENSMMUT00000009208	1301	1460	+
ENSMMUG00000006579	PYGO2	pygopus family PHD finger 2 [Source:HGNC Symbol;Acc:HGNC:30257]	ENSMMUT00000009211	1421	1650	+
ENSMMUG00000008629	SEMA4D	sema domain, immunoglobulin domain (Ig), transmembrane domain (TM) and short cytoplasmic domain, (semaphorin) 4D [Source:HGNC Symbol;Acc:HGNC:10732]	ENSMMUT00000012067	4001	4391	+
ENSMMUG00000006581	SHC1	Uncharacterized protein [Source:UniProtKB/TrEMBL;Acc:F6VZ20]	ENSMMUT00000009213	441	610	+
ENSMMUG00000015917	ST6GALNAC4	Uncharacterized protein [Source:UniProtKB/TrEMBL;Acc:F6VZ33]	ENSMMUT00000045870	931	1040	+
ENSMMUG00000006584	FLAD1	Uncharacterized protein [Source:UniProtKB/TrEMBL;Acc:F6VZZ3]	ENSMMUT00000045867	731	960	+
ENSMMUG00000018258	PTGES2	prostaglandin E synthase 2 [Source:HGNC Symbol;Acc:HGNC:17822]	ENSMMUT00000025656	741	950	+
ENSMMUG00000004053	ZBTB7B	Uncharacterized protein [Source:UniProtKB/TrEMBL;Acc:F6W012]	ENSMMUT00000005752	1631	1800	+
ENSMMUG00000014375	FAM102A	Early estrogen-induced gene 1 protein; Early estrogen-induced gene 1 protein isoform a; Uncharacterized protein [Source:UniProtKB/TrEMBL;Acc:F7CLX8]	ENSMMUT00000020172	1271	1660	+
ENSMMUG00000014374	DPM2	Uncharacterized protein [Source:UniProtKB/TrEMBL;Acc:F7CLY7]	ENSMMUT00000020171	1181	1540	+
ENSMMUG00000001185	TRA2B	Uncharacterized protein [Source:UniProtKB/TrEMBL;Acc:F6R8W2]	ENSMMUT00000001680	831	940	+
ENSMMUG00000023340	ADAM15	ADAM metallopeptidase domain 15 [Source:HGNC Symbol;Acc:HGNC:193]	ENSMMUT00000032837	2591	2790	+
ENSMMUG00000018903	VEZT	Uncharacterized protein [Source:UniProtKB/TrEMBL;Acc:F6TT91]	ENSMMUT00000026576	2231	2490	+
ENSMMUG00000018506	FPGS	folylpolyglutamate synthase [Source:HGNC Symbol;Acc:HGNC:3824]	ENSMMUT00000045853	1501	1680	+
ENSMMUG00000013018	SENP2	SUMO1/sentrin/SMT3 specific peptidase 2 [Source:HGNC Symbol;Acc:HGNC:23116]	ENSMMUT00000018259	2541	2810	+
ENSMMUG00000023815	TMEM41A	Uncharacterized protein [Source:UniProtKB/TrEMBL;Acc:F6TTF0]	ENSMMUT00000033515	791	1030	+
ENSMMUG00000013195	CDK9	Uncharacterized protein [Source:UniProtKB/TrEMBL;Acc:F6XP46]	ENSMMUT00000018509	1431	1660	+
ENSMMUG00000016432	SH2D3C	SH2 domain containing 3C [Source:HGNC Symbol;Acc:HGNC:16884]	ENSMMUT00000023076	1581	1820	+
ENSMMUG00000000425	VPS8	vacuolar protein sorting 8 homolog (S. cerevisiae) [Source:HGNC Symbol;Acc:HGNC:29122]	ENSMMUT00000000624	4581	4924	+
ENSMMUG00000013219	SLC50A1	Uncharacterized protein [Source:UniProtKB/TrEMBL;Acc:F6TTJ4]	ENSMMUT00000018542	1201	1300	+
ENSMMUG00000016424	PTRH1	Putative peptidyl-tRNA hydrolase; Uncharacterized protein [Source:UniProtKB/TrEMBL;Acc:F7FKW9]	ENSMMUT00000023062	2101	2260	+
ENSMMUG00000019036	DPM3	Uncharacterized protein [Source:UniProtKB/TrEMBL;Acc:F6R3K4]	ENSMMUT00000026747	11	120	+
ENSMMUG00000012180	KRTCAP2	Uncharacterized protein [Source:UniProtKB/TrEMBL;Acc:F7HTS8]	ENSMMUT00000017057	371	529	+
ENSMMUG00000009312	LTA4H	leukotriene A4 hydrolase [Source:HGNC Symbol;Acc:HGNC:6710]	ENSMMUT00000013015	141	280	+
ENSMMUG00000018145	ELK3	ETS domain-containing protein Elk-3; ETS-related protein NET; Uncharacterized protein [Source:UniProtKB/TrEMBL;Acc:F7F772]	ENSMMUT00000025497	451	600	+
ENSMMUG00000015902	CDK17	Cyclin-dependent kinase 17 isoform 1; Uncharacterized protein [Source:UniProtKB/TrEMBL;Acc:F7ATI3]	ENSMMUT00000022345	1621	1827	+
ENSMMUG00000012167	SLC2A8	Solute carrier family 2, facilitated glucose transporter member 8; Uncharacterized protein [Source:UniProtKB/TrEMBL;Acc:F6TU81]	ENSMMUT00000045822	1381	1590	+
ENSMMUG00000008506	MTX1	Uncharacterized protein [Source:UniProtKB/TrEMBL;Acc:F6TU71]	ENSMMUT00000011889	1341	1529	+
ENSMMUG00000007524	POLR2H	polymerase (RNA) II (DNA directed) polypeptide H [Source:HGNC Symbol;Acc:HGNC:9195]	ENSMMUT00000010524	1531	1670	+
ENSMMUG00000023719	TMPO	Thymopoietin isoform alpha; Uncharacterized protein [Source:UniProtKB/TrEMBL;Acc:F7HAU0]	ENSMMUT00000033382	741	910	+
ENSMMUG00000023036	SLC25A3	Uncharacterized protein [Source:UniProtKB/TrEMBL;Acc:F6TUD5]	ENSMMUT00000032414	1008	1256	+
ENSMMUG00000018313	SCAMP3	Secretory carrier-associated membrane protein 3 isoform 1; Uncharacterized protein [Source:UniProtKB/TrEMBL;Acc:F6TUP0]	ENSMMUT00000045813	321	490	+
ENSMMUG00000010934	EIF4G1	eukaryotic translation initiation factor 4 gamma, 1 [Source:HGNC Symbol;Acc:HGNC:3296]	ENSMMUT00000015299	1341	1540	+
ENSMMUG00000000800	PSMD2	proteasome (prosome, macropain) 26S subunit, non-ATPase, 2 [Source:HGNC Symbol;Acc:HGNC:9559]	ENSMMUT00000001162	3341	3440	+
ENSMMUG00000023144	FDPS	Uncharacterized protein [Source:UniProtKB/TrEMBL;Acc:F7FI22]	ENSMMUT00000032559	1117	1460	+
ENSMMUG00000018951	ALG3	Uncharacterized protein [Source:UniProtKB/TrEMBL;Acc:F6YE20]	ENSMMUT00000026647	721	820	+
ENSMMUG00000018080	DAP3	death associated protein 3 [Source:HGNC Symbol;Acc:HGNC:2673]	ENSMMUT00000045790	1261	1514	+
ENSMMUG00000006558	ABCF3	ATP-binding cassette, sub-family F (GCN20), member 3 [Source:HGNC Symbol;Acc:HGNC:72]	ENSMMUT00000009191	2111	2420	+
ENSMMUG00000003668	GAPVD1	GTPase activating protein and VPS9 domains 1 [Source:HGNC Symbol;Acc:HGNC:23375]	ENSMMUT00000005198	4221	4410	+
ENSMMUG00000023601	UHRF1BP1L	UHRF1 binding protein 1-like [Source:HGNC Symbol;Acc:HGNC:29102]	ENSMMUT00000033205	4261	4420	+
ENSMMUG00000009981	MSTO1	misato 1, mitochondrial distribution and morphology regulator [Source:HGNC Symbol;Acc:HGNC:29678]	ENSMMUT00000045785	1701	2008	+
ENSMMUG00000005217	HSPA5	78 kDa glucose-regulated protein; Uncharacterized protein [Source:UniProtKB/TrEMBL;Acc:F7C3R1]	ENSMMUT00000007348	1471	2000	+
ENSMMUG00000006553	DVL3	Uncharacterized protein [Source:UniProtKB/TrEMBL;Acc:F7HRV7]	ENSMMUT00000009182	2071	2270	+
ENSMMUG00000009987	GON4L	gon-4-like (C. elegans) [Source:HGNC Symbol;Acc:HGNC:25973]	ENSMMUT00000013947	5841	5940	+
ENSMMUG00000023600	SCYL2	Uncharacterized protein [Source:UniProtKB/TrEMBL;Acc:F7HDE5]	ENSMMUT00000033200	3021	3230	+
ENSMMUG00000020549	PPP6C	Serine/threonine-protein phosphatase [Source:UniProtKB/TrEMBL;Acc:F7D2A2]	ENSMMUT00000028914	1351	1530	+
ENSMMUG00000006562	EIF2B5	Translation initiation factor eIF-2B subunit epsilon; Uncharacterized protein [Source:UniProtKB/TrEMBL;Acc:F7HRU2]	ENSMMUT00000009193	2401	2880	+
ENSMMUG00000007223	DIRAS2	Distinct subgroup of the Ras family member 2; GTP-binding protein Di-Ras2; Uncharacterized protein [Source:UniProtKB/TrEMBL;Acc:F7EK27]	ENSMMUT00000010092	581	1120	+
ENSMMUG00000001748	SYK	Tyrosine-protein kinase [Source:UniProtKB/TrEMBL;Acc:F7GLV2]	ENSMMUT00000002471	2121	2298	+
ENSMMUG00000023257	NFIL3	E4 promoter-binding protein 4; Nuclear factor interleukin-3-regulated protein; Uncharacterized protein [Source:UniProtKB/TrEMBL;Acc:F7DIW5]	ENSMMUT00000032711	1281	1460	+
ENSMMUG00000005515	ABCC5	Multidrug resistance-associated protein 5 isoform 2; Uncharacterized protein [Source:UniProtKB/TrEMBL;Acc:F6U893]	ENSMMUT00000007759	4161	4290	+
ENSMMUG00000018075	YY1AP1	YY1 associated protein 1 [Source:HGNC Symbol;Acc:HGNC:30935]	ENSMMUT00000045764	2471	2633	+
ENSMMUG00000003006	SPTLC1	serine palmitoyltransferase, long chain base subunit 1 [Source:HGNC Symbol;Acc:HGNC:11277]	ENSMMUT00000004255	681	809	+
ENSMMUG00000004628	IARS	isoleucyl-tRNA synthetase [Source:HGNC Symbol;Acc:HGNC:5330]	ENSMMUT00000006546	3321	3470	+
ENSMMUG00000012891	UTP20	Uncharacterized protein [Source:UniProtKB/TrEMBL;Acc:F6S843]	ENSMMUT00000018092	8351	8570	+
ENSMMUG00000021312	SYT11	Uncharacterized protein [Source:UniProtKB/TrEMBL;Acc:F6UYD0]	ENSMMUT00000029997	161	570	+
ENSMMUG00000018874	RIT1	GTP-binding protein Rit1; Uncharacterized protein [Source:UniProtKB/TrEMBL;Acc:F6WZ38]	ENSMMUT00000026531	661	980	+
ENSMMUG00000004648	KIAA0907	KIAA0907 [Source:HGNC Symbol;Acc:HGNC:29145]	ENSMMUT00000006575	2521	2810	+
ENSMMUG00000013661	PARL	Presenilins-associated rhomboid-like protein, mitochondrial isoform 1 preproprotein; Uncharacterized protein [Source:UniProtKB/TrEMBL;Acc:F7FXP9]	ENSMMUT00000027860	1071	1190	+
ENSMMUG00000005092	ARHGEF2	Rho/Rac guanine nucleotide exchange factor (GEF) 2 [Source:HGNC Symbol;Acc:HGNC:682]	ENSMMUT00000007190	3271	3530	+
ENSMMUG00000008070	YEATS2	YEATS domain containing 2 [Source:HGNC Symbol;Acc:HGNC:25489]	ENSMMUT00000011285	4821	5064	+
ENSMMUG00000008067	KLHL24	Uncharacterized protein [Source:UniProtKB/TrEMBL;Acc:F7H156]	ENSMMUT00000011280	1891	2359	+
ENSMMUG00000022115	KLHL6	kelch-like family member 6 [Source:HGNC Symbol;Acc:HGNC:18653]	ENSMMUT00000031111	1921	2134	+
ENSMMUG00000013495	SSR2	Uncharacterized protein [Source:UniProtKB/TrEMBL;Acc:F6ZKS3]	ENSMMUT00000018942	891	1108	+
ENSMMUG00000010555	LAMP3	Macaca mulatta lysosomal-associated membrane protein 3 (LAMP3), mRNA. [Source:RefSeq mRNA;Acc:NM_001032872]	ENSMMUT00000014774	151	380	+
ENSMMUG00000004642	IPPK	Inositol-pentakisphosphate 2-kinase; Uncharacterized protein [Source:UniProtKB/TrEMBL;Acc:F6TD69]	ENSMMUT00000006565	1551	1800	+
ENSMMUG00000004689	DRAM1	Uncharacterized protein [Source:UniProtKB/TrEMBL;Acc:F6RM51]	ENSMMUT00000006622	1111	1325	+
ENSMMUG00000001061	BICD2	Uncharacterized protein [Source:UniProtKB/TrEMBL;Acc:F6QN47]	ENSMMUT00000001509	6301	6420	+
ENSMMUG00000005504	NUP37	Nucleoporin Nup37; Uncharacterized protein [Source:UniProtKB/TrEMBL;Acc:F7FLP6]	ENSMMUT00000007746	211	360	+
ENSMMUG00000020795	FGD3	Uncharacterized protein [Source:UniProtKB/TrEMBL;Acc:F6W261]	ENSMMUT00000045738	2841	3123	+
ENSMMUG00000010552	DCUN1D1	DCN1-like protein [Source:UniProtKB/TrEMBL;Acc:F7CZQ4]	ENSMMUT00000014771	1171	1300	+
ENSMMUG00000019323		Uncharacterized protein [Source:UniProtKB/TrEMBL;Acc:F6S2M3]	ENSMMUT00000045737	4769	5117	+
ENSMMUG00000014398	NINJ1	Ninjurin-1; Uncharacterized protein [Source:UniProtKB/TrEMBL;Acc:F7BWD3]	ENSMMUT00000020201	671	950	+
ENSMMUG00000018530		Uncharacterized protein [Source:UniProtKB/TrEMBL;Acc:F7A219]	ENSMMUT00000026053	1	120	+
ENSMMUG00000019832		Uncharacterized protein [Source:UniProtKB/TrEMBL;Acc:F6W2A6]	ENSMMUT00000027871	415	550	+
ENSMMUG00000012105	FXR1	Uncharacterized protein [Source:UniProtKB/TrEMBL;Acc:F6W8A6]	ENSMMUT00000045729	2301	2413	+
ENSMMUG00000004901	SEMA4A	sema domain, immunoglobulin domain (Ig), transmembrane domain (TM) and short cytoplasmic domain, (semaphorin) 4A [Source:HGNC Symbol;Acc:HGNC:10729]	ENSMMUT00000045724	2584	2980	+
ENSMMUG00000009493	FAM120A	Uncharacterized protein [Source:UniProtKB/TrEMBL;Acc:F6W8T6]	ENSMMUT00000045721	2971	3481	+
ENSMMUG00000006350	NT5DC3	Uncharacterized protein [Source:UniProtKB/TrEMBL;Acc:F7HC19]	ENSMMUT00000008909	1701	2080	+
ENSMMUG00000019656	TTC14	Uncharacterized protein [Source:UniProtKB/TrEMBL;Acc:F7CU52]	ENSMMUT00000027615	2141	2400	+
ENSMMUG00000031593	SARNP	SAP domain containing ribonucleoprotein [Source:HGNC Symbol;Acc:HGNC:24432]	ENSMMUT00000045723	501	620	+
ENSMMUG00000004902	SLC25A44	Solute carrier family 25 member 44; Uncharacterized protein [Source:UniProtKB/TrEMBL;Acc:F7CJF0]	ENSMMUT00000006923	361	560	+
ENSMMUG00000023469	HSP90B1	Uncharacterized protein [Source:UniProtKB/TrEMBL;Acc:F6W970]	ENSMMUT00000033019	841	1010	+
ENSMMUG00000008281	PHF2	PHD finger protein 2 [Source:HGNC Symbol;Acc:HGNC:8920]	ENSMMUT00000011583	3981	4130	+
ENSMMUG00000031591	C11H12ORF73	Putative uncharacterized protein C12orf73; Uncharacterized protein [Source:UniProtKB/TrEMBL;Acc:F6W981]	ENSMMUT00000045714	241	373	+
ENSMMUG00000021291	TDG	thymine-DNA glycosylase [Source:HGNC Symbol;Acc:HGNC:11700]	ENSMMUT00000029955	1031	1260	+
ENSMMUG00000000090	SMG5	Uncharacterized protein [Source:UniProtKB/TrEMBL;Acc:F6W9D7]	ENSMMUT00000000134	3271	3390	+
ENSMMUG00000022571	HCFC2	Uncharacterized protein [Source:UniProtKB/TrEMBL;Acc:F6W9B8]	ENSMMUT00000031756	2165	2401	+
ENSMMUG00000009746	NDUFB5	Uncharacterized protein [Source:UniProtKB/TrEMBL;Acc:F6W9A8]	ENSMMUT00000013614	941	1042	+
ENSMMUG00000017127	CHST11	Carbohydrate sulfotransferase 11 isoform 1; Uncharacterized protein [Source:UniProtKB/TrEMBL;Acc:F6W9N9]	ENSMMUT00000045705	1311	1500	+
ENSMMUG00000000092	C1orf85	chromosome 1 open reading frame 85 [Source:HGNC Symbol;Acc:HGNC:29436]	ENSMMUT00000000137	1231	1400	+
ENSMMUG00000016343	HIATL1	Uncharacterized protein [Source:UniProtKB/TrEMBL;Acc:F7GRF2]	ENSMMUT00000022950	2301	2410	+
ENSMMUG00000017133	C12orf45	chromosome 12 open reading frame 45 [Source:HGNC Symbol;Acc:HGNC:28628]	ENSMMUT00000024087	421	590	+
ENSMMUG00000011383	MTHFD2	methylenetetrahydrofolate dehydrogenase (NADP+ dependent) 2, methenyltetrahydrofolate cyclohydrolase [Source:HGNC Symbol;Acc:HGNC:7434]	ENSMMUT00000015940	781	893	+
ENSMMUG00000009519	KIAA1033	KIAA1033 [Source:HGNC Symbol;Acc:HGNC:29174]	ENSMMUT00000013281	3416	3980	+
ENSMMUG00000004079	MFN1	Mitofusin-1; Uncharacterized protein [Source:UniProtKB/TrEMBL;Acc:F6ZJ06]	ENSMMUT00000005794	1861	2130	+
ENSMMUG00000009524	APPL2	adaptor protein, phosphotyrosine interaction, PH domain and leucine zipper containing 2 [Source:HGNC Symbol;Acc:HGNC:18242]	ENSMMUT00000013294	1771	1950	+
ENSMMUG00000002634	PTCH1	patched 1 [Source:HGNC Symbol;Acc:HGNC:9585]	ENSMMUT00000003754	3661	4200	+
ENSMMUG00000005188	PIK3CA	Uncharacterized protein [Source:UniProtKB/TrEMBL;Acc:F7CTS2]	ENSMMUT00000007307	2981	3387	+
ENSMMUG00000003711	TCP11L2	Uncharacterized protein [Source:UniProtKB/TrEMBL;Acc:F6S8U5]	ENSMMUT00000005257	1591	1980	+
ENSMMUG00000003216	ZMAT3	Uncharacterized protein [Source:UniProtKB/TrEMBL;Acc:F7EAY3]	ENSMMUT00000004557	321	460	+
ENSMMUG00000005208	POLR3B	DNA-directed RNA polymerase [Source:UniProtKB/TrEMBL;Acc:F6WH42]	ENSMMUT00000045683	4221	4653	+
ENSMMUG00000011787	ERCC6L2	excision repair cross-complementation group 6-like 2 [Source:HGNC Symbol;Acc:HGNC:26922]	ENSMMUT00000016520	608	810	+
ENSMMUG00000019597	TBL1XR1	Uncharacterized protein [Source:UniProtKB/TrEMBL;Acc:F7B9D1]	ENSMMUT00000027520	4971	5170	+
ENSMMUG00000007992	SLC35D2	Uncharacterized protein [Source:UniProtKB/TrEMBL;Acc:F6WHP3]	ENSMMUT00000011180	772	1221	+
ENSMMUG00000005997	CDC14B	Uncharacterized protein [Source:UniProtKB/TrEMBL;Acc:F6UDW4]	ENSMMUT00000008389	1601	1700	+
ENSMMUG00000022279	C11H12ORF23	Putative uncharacterized protein C12orf23; Uncharacterized protein [Source:UniProtKB/TrEMBL;Acc:F6WHZ2]	ENSMMUT00000031337	224	326	+
ENSMMUG00000002623	APOA1BP	apolipoprotein A-I binding protein [Source:HGNC Symbol;Acc:HGNC:18453]	ENSMMUT00000003734	1171	1390	+
ENSMMUG00000015544	PWP1	Uncharacterized protein [Source:UniProtKB/TrEMBL;Acc:F6RFX4]	ENSMMUT00000021805	151	280	+
ENSMMUG00000031574		Uncharacterized protein [Source:UniProtKB/TrEMBL;Acc:F6WPM1]	ENSMMUT00000045660	332	510	+
ENSMMUG00000015550	PRDM4	PR domain zinc finger protein 4 [Source:UniProtKB/TrEMBL;Acc:F6RFV6]	ENSMMUT00000021807	2521	2670	+
ENSMMUG00000017124	SART3	Squamous cell carcinoma antigen recognized by T-cells 3; Uncharacterized protein [Source:UniProtKB/TrEMBL;Acc:F7H2Z6]	ENSMMUT00000024076	2861	3190	+
ENSMMUG00000000512	CORO1C	Coronin [Source:UniProtKB/TrEMBL;Acc:F6YB63]	ENSMMUT00000045652	1271	1690	+
ENSMMUG00000015107	SSH1	slingshot protein phosphatase 1 [Source:HGNC Symbol;Acc:HGNC:30579]	ENSMMUT00000021176	2371	2790	+
ENSMMUG00000000037	ISG20L2	Interferon-stimulated 20 kDa exonuclease-like 2; Uncharacterized protein [Source:UniProtKB/TrEMBL;Acc:F7HRE8]	ENSMMUT00000000053	1251	1450	+
ENSMMUG00000021899	SEC62	Translocation protein SEC62; Uncharacterized protein [Source:UniProtKB/TrEMBL;Acc:F6TBV4]	ENSMMUT00000030813	1151	1300	+
ENSMMUG00000000039	MRPL24	39S ribosomal protein L24, mitochondrial; Uncharacterized protein [Source:UniProtKB/TrEMBL;Acc:F7HPI2]	ENSMMUT00000000055	761	880	+
ENSMMUG00000006956	ALKBH2	Alpha-ketoglutarate-dependent dioxygenase alkB homolog 2 isoform 1; Uncharacterized protein [Source:UniProtKB/TrEMBL;Acc:F7DWK4]	ENSMMUT00000009720	180	490	+
ENSMMUG00000006957	UNG	uracil-DNA glycosylase [Source:HGNC Symbol;Acc:HGNC:12572]	ENSMMUT00000009722	961	1210	+
ENSMMUG00000019649	KCTD10	Uncharacterized protein [Source:UniProtKB/TrEMBL;Acc:F7CV62]	ENSMMUT00000027599	691	940	+
ENSMMUG00000005938	PDCD10	programmed cell death 10 [Source:HGNC Symbol;Acc:HGNC:8761]	ENSMMUT00000021997	721	920	+
ENSMMUG00000010484	GIT2	ARF GTPase-activating protein GIT2 isoform 1; Uncharacterized protein [Source:UniProtKB/TrEMBL;Acc:F6UCN1]	ENSMMUT00000014675	4941	5130	+
ENSMMUG00000008974		Uncharacterized protein [Source:UniProtKB/TrEMBL;Acc:F7EQR1]	ENSMMUT00000012540	3401	3530	+
ENSMMUG00000008972	FCRL5	Fc receptor-like 5 [Source:HGNC Symbol;Acc:HGNC:18508]	ENSMMUT00000012536	91	280	+
ENSMMUG00000009564	NMD3	NMD3 ribosome export adaptor [Source:HGNC Symbol;Acc:HGNC:24250]	ENSMMUT00000013344	1615	1821	+
ENSMMUG00000018083	KPNA4	karyopherin alpha 4 (importin alpha 3) [Source:HGNC Symbol;Acc:HGNC:6397]	ENSMMUT00000025402	1980	2320	+
ENSMMUG00000017291	SMC4	Uncharacterized protein [Source:UniProtKB/TrEMBL;Acc:F6UIR1]	ENSMMUT00000024306	2371	2520	+
ENSMMUG00000007678	ANKRD13A	ankyrin repeat domain 13A [Source:HGNC Symbol;Acc:HGNC:21268]	ENSMMUT00000010755	1911	2030	+
ENSMMUG00000020826	C12orf76	chromosome 12 open reading frame 76 [Source:HGNC Symbol;Acc:HGNC:33790]	ENSMMUT00000029297	361	700	+
ENSMMUG00000018675	ANAPC7	Uncharacterized protein [Source:UniProtKB/TrEMBL;Acc:F6ZY88]	ENSMMUT00000026255	2251	2360	+
ENSMMUG00000006494	GPN3	Uncharacterized protein [Source:UniProtKB/TrEMBL;Acc:F7H992]	ENSMMUT00000009103	841	1084	+
ENSMMUG00000023510	MFSD1	major facilitator superfamily domain containing 1 [Source:HGNC Symbol;Acc:HGNC:25874]	ENSMMUT00000033073	1741	2000	+
ENSMMUG00000009255	VPS29	Uncharacterized protein [Source:UniProtKB/TrEMBL;Acc:F6UJC8]	ENSMMUT00000012932	251	410	+
ENSMMUG00000004961	GFM1	Uncharacterized protein [Source:UniProtKB/TrEMBL;Acc:F6UJH2]	ENSMMUT00000045602	2241	2482	+
ENSMMUG00000013156	PPTC7	PTC7 protein phosphatase homolog (S. cerevisiae) [Source:HGNC Symbol;Acc:HGNC:30695]	ENSMMUT00000018458	3631	3730	+
ENSMMUG00000012840	HVCN1	hydrogen voltage-gated channel 1 [Source:HGNC Symbol;Acc:HGNC:28240]	ENSMMUT00000018011	951	1202	+
ENSMMUG00000013664	PPP1CC	Serine/threonine-protein phosphatase [Source:UniProtKB/TrEMBL;Acc:F7GFT6]	ENSMMUT00000019184	1071	1320	+
ENSMMUG00000002223	SH2B3	Uncharacterized protein [Source:UniProtKB/TrEMBL;Acc:F6W719]	ENSMMUT00000003148	1571	1710	+
ENSMMUG00000002226	ATXN2	ataxin 2 [Source:HGNC Symbol;Acc:HGNC:10555]	ENSMMUT00000003151	541	790	+
ENSMMUG00000031548		Peptidyl-prolyl cis-trans isomerase [Source:UniProtKB/TrEMBL;Acc:F6UK89]	ENSMMUT00000045595	348	490	+
ENSMMUG00000017107	BRAP	BRCA1-associated protein; Uncharacterized protein [Source:UniProtKB/TrEMBL;Acc:F7H5B0]	ENSMMUT00000024051	1861	2150	+
ENSMMUG00000016497	CCNL1	cyclin L1 [Source:HGNC Symbol;Acc:HGNC:20569]	ENSMMUT00000014999	1731	2078	+
ENSMMUG00000000366	TIPARP	Uncharacterized protein [Source:UniProtKB/TrEMBL;Acc:F6USD8]	ENSMMUT00000045586	1641	2138	+
ENSMMUG00000016970	SSR3	Translocon-associated protein subunit gamma; Uncharacterized protein [Source:UniProtKB/TrEMBL;Acc:F7B6K2]	ENSMMUT00000023845	1155	1330	+
ENSMMUG00000007324	GMPS	Glutamine-hydrolyzing GMP synthase; Uncharacterized protein [Source:UniProtKB/TrEMBL;Acc:F7EE95]	ENSMMUT00000010233	2191	2300	+
ENSMMUG00000013916	ERP29	endoplasmic reticulum protein 29 [Source:HGNC Symbol;Acc:HGNC:13799]	ENSMMUT00000019531	711	840	+
ENSMMUG00000013917	NAA25	N(alpha)-acetyltransferase 25, NatB auxiliary subunit [Source:HGNC Symbol;Acc:HGNC:25783]	ENSMMUT00000019536	2765	2910	+
ENSMMUG00000005255	TRAFD1	TRAF-type zinc finger domain-containing protein 1; Uncharacterized protein [Source:UniProtKB/TrEMBL;Acc:F7BQF4]	ENSMMUT00000007399	2191	2420	+
ENSMMUG00000007126		Uncharacterized protein [Source:UniProtKB/TrEMBL;Acc:F6V133]	ENSMMUT00000045572	9071	9230	+
ENSMMUG00000004705	TAGLN2	Transgelin-2; Uncharacterized protein [Source:UniProtKB/TrEMBL;Acc:F6RKI4]	ENSMMUT00000006645	1	130	+
ENSMMUG00000011347	DHX36	Uncharacterized protein [Source:UniProtKB/TrEMBL;Acc:F6U0V1]	ENSMMUT00000015892	2904	3269	+
ENSMMUG00000031542	IGSF8	immunoglobulin superfamily, member 8 [Source:HGNC Symbol;Acc:HGNC:17813]	ENSMMUT00000045566	1011	1220	+
ENSMMUG00000015910	MBNL1	Uncharacterized protein [Source:UniProtKB/TrEMBL;Acc:F7ALT3]	ENSMMUT00000022363	5341	5500	+
ENSMMUG00000007433		Uncharacterized protein [Source:UniProtKB/TrEMBL;Acc:F6UUD1]	ENSMMUT00000045564	631	763	+
ENSMMUG00000013253	PTPN11	Tyrosine-protein phosphatase non-receptor type 11; Uncharacterized protein [Source:UniProtKB/TrEMBL;Acc:F6ZJD8]	ENSMMUT00000018606	1881	1990	+
ENSMMUG00000017841		DDB1-and CUL4-associated factor 8; Uncharacterized protein [Source:UniProtKB/TrEMBL;Acc:F7DQC9]	ENSMMUT00000025072	341	720	+
ENSMMUG00000008505	OAS2	2'-5'-oligoadenylate synthetase 2, 69/71kDa [Source:HGNC Symbol;Acc:HGNC:8087]	ENSMMUT00000045555	2031	2380	+
ENSMMUG00000021852	PEX19	Uncharacterized protein [Source:UniProtKB/TrEMBL;Acc:F7EI07]	ENSMMUT00000030747	3051	3240	+
ENSMMUG00000021854	COPA	Uncharacterized protein [Source:UniProtKB/TrEMBL;Acc:F6WKP1]	ENSMMUT00000030749	3201	3380	+
ENSMMUG00000021795	DDX54	DEAD (Asp-Glu-Ala-Asp) box polypeptide 54 [Source:HGNC Symbol;Acc:HGNC:20084]	ENSMMUT00000030669	2671	2990	+
ENSMMUG00000015590	SIAH2	E3 ubiquitin-protein ligase SIAH2; Uncharacterized protein [Source:UniProtKB/TrEMBL;Acc:F6TED2]	ENSMMUT00000021864	841	1305	+
ENSMMUG00000017695	SERP1	Ribosome-associated membrane protein RAMP4-2; Stress-associated endoplasmic reticulum protein 1; Uncharacterized protein [Source:UniProtKB/TrEMBL;Acc:F6U9F6]	ENSMMUT00000024872	1213	1707	+
ENSMMUG00000001129	RITA1	RBPJ interacting and tubulin associated 1 [Source:HGNC Symbol;Acc:HGNC:25925]	ENSMMUT00000001594	431	673	+
ENSMMUG00000021856	NCSTN	Uncharacterized protein [Source:UniProtKB/TrEMBL;Acc:F6WKT8]	ENSMMUT00000030756	2231	2660	+
ENSMMUG00000017696	EIF2A	Uncharacterized protein [Source:UniProtKB/TrEMBL;Acc:F6U3K9]	ENSMMUT00000045550	1401	1540	+
ENSMMUG00000004435	TPCN1	two pore segment channel 1 [Source:HGNC Symbol;Acc:HGNC:18182]	ENSMMUT00000006288	2601	2800	+
ENSMMUG00000023335	RNF13	ring finger protein 13 [Source:HGNC Symbol;Acc:HGNC:10057]	ENSMMUT00000032825	761	1155	+
ENSMMUG00000015809	SLAMF1	signaling lymphocytic activation molecule family member 1 [Source:HGNC Symbol;Acc:HGNC:10903]	ENSMMUT00000022203	1341	1450	+
ENSMMUG00000017215	TM4SF1	transmembrane 4 L six family member 1 [Source:HGNC Symbol;Acc:HGNC:11853]	ENSMMUT00000024196	1397	1638	+
ENSMMUG00000031532		Uncharacterized protein [Source:UniProtKB/TrEMBL;Acc:F6WLA4]	ENSMMUT00000006972	291	390	+
ENSMMUG00000001906	MED13L	Mediator of RNA polymerase II transcription subunit 13-like; Uncharacterized protein [Source:UniProtKB/TrEMBL;Acc:F7FWX5]	ENSMMUT00000002694	6751	7150	+
ENSMMUG00000005528	HPS3	Hermansky-Pudlak syndrome 3 [Source:HGNC Symbol;Acc:HGNC:15597]	ENSMMUT00000007784	2791	3000	+
ENSMMUG00000005526	HLTF	helicase-like transcription factor [Source:HGNC Symbol;Acc:HGNC:11099]	ENSMMUT00000007782	2841	3010	+
ENSMMUG00000005521	GYG1	Uncharacterized protein [Source:UniProtKB/TrEMBL;Acc:F7GFD0]	ENSMMUT00000007776	1051	1202	+
ENSMMUG00000017479	FBXO21	F-box protein 21 [Source:HGNC Symbol;Acc:HGNC:13592]	ENSMMUT00000024578	1761	2200	+
ENSMMUG00000001996	F11R	Uncharacterized protein [Source:UniProtKB/TrEMBL;Acc:F6V265]	ENSMMUT00000002834	1671	1830	+
ENSMMUG00000021756	PLSCR1	Uncharacterized protein [Source:UniProtKB/TrEMBL;Acc:F6WSM6]	ENSMMUT00000030615	871	990	+
ENSMMUG00000010235	RFC5	Replication factor C subunit 5 isoform 1; Uncharacterized protein [Source:UniProtKB/TrEMBL;Acc:F6QMV0]	ENSMMUT00000014309	1121	1319	+
ENSMMUG00000002003	USF1	Uncharacterized protein [Source:UniProtKB/TrEMBL;Acc:F6V1J8]	ENSMMUT00000002839	1401	1500	+
ENSMMUG00000017055	C2H3ORF58	Golgi protein GoPro49 isoform a; Uncharacterized protein [Source:UniProtKB/TrEMBL;Acc:F7HNR0]	ENSMMUT00000023972	961	1690	+
ENSMMUG00000010236	WSB2	WD repeat and SOCS box containing 2 [Source:HGNC Symbol;Acc:HGNC:19222]	ENSMMUT00000014310	2191	2314	+
ENSMMUG00000009694	SLC9A9	Sodium/hydrogen exchanger [Source:UniProtKB/TrEMBL;Acc:F6WTB3]	ENSMMUT00000045526	1881	2190	+
ENSMMUG00000005098	PEBP1	Phosphatidylethanolamine-binding protein; Phosphatidylethanolamine-binding protein 1; Uncharacterized protein [Source:UniProtKB/TrEMBL;Acc:F5CI18]	ENSMMUT00000007191	1281	1390	+
ENSMMUG00000005099	TAOK3	TAO kinase 3 [Source:HGNC Symbol;Acc:HGNC:18133]	ENSMMUT00000007195	2141	2330	+
ENSMMUG00000002779	CHST2	Carbohydrate sulfotransferase 2; Uncharacterized protein [Source:UniProtKB/TrEMBL;Acc:F7H292]	ENSMMUT00000003943	2446	2810	+
ENSMMUG00000002775	U2SURP	U2 snRNP-associated SURP domain containing [Source:HGNC Symbol;Acc:HGNC:30855]	ENSMMUT00000003941	2431	3080	+
ENSMMUG00000002010	DEDD	Death effector domain-containing protein; Uncharacterized protein [Source:UniProtKB/TrEMBL;Acc:F6UTR2]	ENSMMUT00000002848	971	1260	+
ENSMMUG00000019860	PRKAB1	5'-AMP-activated protein kinase subunit beta-1; Uncharacterized protein [Source:UniProtKB/TrEMBL;Acc:F7GTI4]	ENSMMUT00000027911	1081	1230	+
ENSMMUG00000012405	TRPC1	Short transient receptor potential channel 1; Uncharacterized protein [Source:UniProtKB/TrEMBL;Acc:F7EA78]	ENSMMUT00000017392	2251	2350	+
ENSMMUG00000022630	PPOX	protoporphyrinogen oxidase [Source:HGNC Symbol;Acc:HGNC:9280]	ENSMMUT00000045517	1701	1810	+
ENSMMUG00000011210	RAB35	RAB35, member RAS oncogene family [Source:HGNC Symbol;Acc:HGNC:9774]	ENSMMUT00000045518	611	1142	+
ENSMMUG00000009152	GCN1L1	GCN1 general control of amino-acid synthesis 1-like 1 (yeast) [Source:HGNC Symbol;Acc:HGNC:4199]	ENSMMUT00000012805	8031	8420	+
ENSMMUG00000022629	B4GALT3	Uncharacterized protein [Source:UniProtKB/TrEMBL;Acc:F6WU79]	ENSMMUT00000031844	1271	1692	+
ENSMMUG00000009157	RPLP0	ribosomal protein, large, P0 [Source:HGNC Symbol;Acc:HGNC:10371]	ENSMMUT00000045510	461	700	+
ENSMMUG00000004520	NDUFS2	Uncharacterized protein [Source:UniProtKB/TrEMBL;Acc:F6SCT3]	ENSMMUT00000025476	1931	2040	+
ENSMMUG00000009159		Uncharacterized protein [Source:UniProtKB/TrEMBL;Acc:F6TIZ1]	ENSMMUT00000045507	1761	1940	+
ENSMMUG00000012256	ATP1B3	Uncharacterized protein [Source:UniProtKB/TrEMBL;Acc:F6V064]	ENSMMUT00000045508	1349	1486	+
ENSMMUG00000031526	ZBTB38	Uncharacterized protein; Zinc finger and BTB domain-containing protein 38 [Source:UniProtKB/TrEMBL;Acc:F6TJ26]	ENSMMUT00000045502	1211	1330	+
ENSMMUG00000016494	SRSF9	Uncharacterized protein [Source:UniProtKB/TrEMBL;Acc:F7G4A1]	ENSMMUT00000023167	161	339	+
ENSMMUG00000004223	RNF10	RING finger protein 10; Uncharacterized protein [Source:UniProtKB/TrEMBL;Acc:F6TJ77]	ENSMMUT00000045497	2971	3100	+
ENSMMUG00000022153	SLC25A36	solute carrier family 25 (pyrimidine nucleotide carrier ), member 36 [Source:HGNC Symbol;Acc:HGNC:25554]	ENSMMUT00000031161	671	860	+
ENSMMUG00000018126	TOMM40L	Mitochondrial import receptor subunit TOM40B; Uncharacterized protein [Source:UniProtKB/TrEMBL;Acc:F7FCD5]	ENSMMUT00000045499	2263	2595	+
ENSMMUG00000020602	POP5	Ribonuclease P/MRP protein subunit POP5 isoform a; Uncharacterized protein [Source:UniProtKB/TrEMBL;Acc:F7BZ76]	ENSMMUT00000028986	651	789	+
ENSMMUG00000003051	COPB2	coatomer protein complex, subunit beta 2 (beta prime) [Source:HGNC Symbol;Acc:HGNC:2232]	ENSMMUT00000004320	2471	2930	+
ENSMMUG00000003048	MRPS22	28S ribosomal protein S22, mitochondrial; Uncharacterized protein [Source:UniProtKB/TrEMBL;Acc:F6VEV8]	ENSMMUT00000004317	911	1072	+
ENSMMUG00000000183	MLEC	Malectin; Uncharacterized protein [Source:UniProtKB/TrEMBL;Acc:F7HJM2]	ENSMMUT00000000273	921	1070	+
ENSMMUG00000020648	ACADS	Uncharacterized protein [Source:UniProtKB/TrEMBL;Acc:F6TRA8]	ENSMMUT00000029046	1207	1517	+
ENSMMUG00000008666	PIK3CB	phosphatidylinositol-4,5-bisphosphate 3-kinase, catalytic subunit beta [Source:HGNC Symbol;Acc:HGNC:8976]	ENSMMUT00000012114	3058	3537	+
ENSMMUG00000012411	SDHC	Succinate dehydrogenase cytochrome b560 subunit, mitochondrial isoform 2; Uncharacterized protein [Source:UniProtKB/TrEMBL;Acc:F6TR99]	ENSMMUT00000017397	931	1125	+
ENSMMUG00000020650	SPPL3	Uncharacterized protein [Source:UniProtKB/TrEMBL;Acc:F6TRI6]	ENSMMUT00000029047	1186	1682	+
ENSMMUG00000003775	FCGR2B	Uncharacterized protein [Source:UniProtKB/TrEMBL;Acc:F7GVR0]	ENSMMUT00000005345	1171	1400	+
ENSMMUG00000021284	DBR1	Lariat debranching enzyme; Uncharacterized protein [Source:UniProtKB/TrEMBL;Acc:F6V8K9]	ENSMMUT00000029946	1409	1598	+
ENSMMUG00000016969	CAMKK2	calcium/calmodulin-dependent protein kinase kinase 2, beta [Source:HGNC Symbol;Acc:HGNC:1470]	ENSMMUT00000045468	4591	4690	+
ENSMMUG00000004049	ATF6	Uncharacterized protein [Source:UniProtKB/TrEMBL;Acc:F6ZR51]	ENSMMUT00000005748	1731	2090	+
ENSMMUG00000019360	TMEM22	Transmembrane protein 22; Uncharacterized protein [Source:UniProtKB/TrEMBL;Acc:F6TAG1]	ENSMMUT00000027190	1361	1580	+
ENSMMUG00000003263	STAG1	stromal antigen 1 [Source:HGNC Symbol;Acc:HGNC:11354]	ENSMMUT00000004616	791	970	+
ENSMMUG00000019513	UHMK1	Uncharacterized protein [Source:UniProtKB/TrEMBL;Acc:F7CXV5]	ENSMMUT00000027409	2391	2520	+
ENSMMUG00000003262	PCCB	Propionyl-CoA carboxylase beta chain, mitochondrial isoform 1; Uncharacterized protein [Source:UniProtKB/TrEMBL;Acc:F7DJ09]	ENSMMUT00000004614	1591	1825	+
ENSMMUG00000019514	UAP1	UDP-N-acetylhexosamine pyrophosphorylase; Uncharacterized protein [Source:UniProtKB/TrEMBL;Acc:F7CXU2]	ENSMMUT00000027411	1921	2140	+
ENSMMUG00000019090		Uncharacterized protein [Source:UniProtKB/TrEMBL;Acc:F6QD77]	ENSMMUT00000045464	2181	2353	+
ENSMMUG00000021563	RNF34	Uncharacterized protein [Source:UniProtKB/TrEMBL;Acc:F7F6I1]	ENSMMUT00000030345	401	530	+
ENSMMUG00000021564	KDM2B	Uncharacterized protein [Source:UniProtKB/TrEMBL;Acc:F7EGM6]	ENSMMUT00000045460	4161	4410	+
ENSMMUG00000000933	MSL2	Male-specific lethal 2 homolog isoform 1; Uncharacterized protein [Source:UniProtKB/TrEMBL;Acc:F6R6H5]	ENSMMUT00000001331	1141	1670	+
ENSMMUG00000031508		Uncharacterized protein [Source:UniProtKB/TrEMBL;Acc:F7EHY7]	ENSMMUT00000030751	412	549	+
ENSMMUG00000001306	ORAI1	Uncharacterized protein [Source:UniProtKB/TrEMBL;Acc:F7BNH0]	ENSMMUT00000001846	711	1176	+
ENSMMUG00000012842		Uncharacterized protein [Source:UniProtKB/TrEMBL;Acc:F6TBI5]	ENSMMUT00000018016	751	890	+
ENSMMUG00000012650	BCL7A	Uncharacterized protein [Source:UniProtKB/TrEMBL;Acc:F7E7W3]	ENSMMUT00000017742	691	840	+
ENSMMUG00000012652	MLXIP	MLX interacting protein [Source:HGNC Symbol;Acc:HGNC:17055]	ENSMMUT00000017744	3226	3550	+
ENSMMUG00000012750	ANAPC13	Anaphase-promoting complex subunit 13; Uncharacterized protein [Source:UniProtKB/TrEMBL;Acc:F7ENP2]	ENSMMUT00000017885	612	970	+
ENSMMUG00000011270	RYK	receptor-like tyrosine kinase [Source:HGNC Symbol;Acc:HGNC:10481]	ENSMMUT00000015763	691	870	+
ENSMMUG00000018037	VPS33A	Diablo homolog, mitochondrial isoform 1; Uncharacterized protein [Source:UniProtKB/TrEMBL;Acc:F7E7K2]	ENSMMUT00000029577	2001	2180	+
ENSMMUG00000008918	SRPRB	Signal recognition particle receptor subunit beta; Uncharacterized protein [Source:UniProtKB/TrEMBL;Acc:F7DHR2]	ENSMMUT00000012467	664	1023	+
ENSMMUG00000000059	TOPBP1	DNA topoisomerase 2-binding protein 1; Uncharacterized protein [Source:UniProtKB/TrEMBL;Acc:F7HM93]	ENSMMUT00000000085	4561	4930	+
ENSMMUG00000021928	CLIP1	CAP-GLY domain containing linker protein 1 [Source:HGNC Symbol;Acc:HGNC:10461]	ENSMMUT00000030851	2661	2790	+
ENSMMUG00000002790	MRPL55	mitochondrial ribosomal protein L55 [Source:HGNC Symbol;Acc:HGNC:16686]	ENSMMUT00000045434	1071	1250	+
ENSMMUG00000000058			ENSMMUT00000000082	1571	1960	+
ENSMMUG00000013643	ZCCHC8	zinc finger, CCHC domain containing 8 [Source:HGNC Symbol;Acc:HGNC:25265]	ENSMMUT00000019148	2011	2380	+
ENSMMUG00000002792			ENSMMUT00000003961	501	750	+
ENSMMUG00000001869	SNAP47	Uncharacterized protein [Source:UniProtKB/TrEMBL;Acc:F7GK63]	ENSMMUT00000002631	2021	2170	+
ENSMMUG00000031499	DENR	density-regulated protein [Source:HGNC Symbol;Acc:HGNC:2769]	ENSMMUT00000045423	231	400	+
ENSMMUG00000001867	JMJD4	Uncharacterized protein [Source:UniProtKB/TrEMBL;Acc:F7GP81]	ENSMMUT00000002630	2031	2350	+
ENSMMUG00000021771	UBA5	ubiquitin-like modifier activating enzyme 5 [Source:HGNC Symbol;Acc:HGNC:23230]	ENSMMUT00000030632	41	150	+
ENSMMUG00000015222	VPS37B	vacuolar protein sorting 37 homolog B (S. cerevisiae) [Source:HGNC Symbol;Acc:HGNC:25754]	ENSMMUT00000021341	561	690	+
ENSMMUG00000015930	ARL6IP4	ADP-ribosylation factor-like 6 interacting protein 4 [Source:HGNC Symbol;Acc:HGNC:18076]	ENSMMUT00000022398	561	740	+
ENSMMUG00000008636	ADCK3	Chaperone activity of bc1 complex-like, mitochondrial; Uncharacterized protein [Source:UniProtKB/TrEMBL;Acc:F7F8M4]	ENSMMUT00000012079	2011	2200	+
ENSMMUG00000001154	NUDT16	U8 snoRNA-decapping enzyme isoform 2; Uncharacterized protein [Source:UniProtKB/TrEMBL;Acc:F6RQ47]	ENSMMUT00000001625	501	738	+
ENSMMUG00000000434	CDK2AP1	Uncharacterized protein [Source:UniProtKB/TrEMBL;Acc:F7A6I0]	ENSMMUT00000000632	800	1000	+
ENSMMUG00000011496	SBNO1	strawberry notch homolog 1 (Drosophila) [Source:HGNC Symbol;Acc:HGNC:22973]	ENSMMUT00000016098	2061	2350	+
ENSMMUG00000005137	ATP2C1	Uncharacterized protein [Source:UniProtKB/TrEMBL;Acc:F6YCV0]	ENSMMUT00000007242	3181	3440	+
ENSMMUG00000023048		Cytochrome b-c1 complex subunit Rieske, mitochondrial [Source:UniProtKB/TrEMBL;Acc:F6V7Y3]	ENSMMUT00000032429	378	580	+
ENSMMUG00000031491	TMED2	transmembrane emp24 domain trafficking protein 2 [Source:HGNC Symbol;Acc:HGNC:16996]	ENSMMUT00000045404	351	531	+
ENSMMUG00000013178	DDX55	DEAD (Asp-Glu-Ala-Asp) box polypeptide 55 [Source:HGNC Symbol;Acc:HGNC:20085]	ENSMMUT00000018486	1401	1854	+
ENSMMUG00000021820	PARP1	poly (ADP-ribose) polymerase 1 [Source:HGNC Symbol;Acc:HGNC:270]	ENSMMUT00000030705	631	927	+
ENSMMUG00000013181	EIF2B1	eukaryotic translation initiation factor 2B, subunit 1 alpha, 26kDa [Source:HGNC Symbol;Acc:HGNC:3257]	ENSMMUT00000018489	1346	1590	+
ENSMMUG00000006546	ATP6V0A2	Uncharacterized protein [Source:UniProtKB/TrEMBL;Acc:F7HS27]	ENSMMUT00000009171	1861	2013	+
ENSMMUG00000004933	METTL6	Uncharacterized protein [Source:UniProtKB/TrEMBL;Acc:F7CDC5]	ENSMMUT00000006960	201	500	+
ENSMMUG00000019058	ACBD3	Uncharacterized protein [Source:UniProtKB/TrEMBL;Acc:F6QTK2]	ENSMMUT00000026776	1031	1600	+
ENSMMUG00000023107	NCOR2	nuclear receptor corepressor 2 [Source:HGNC Symbol;Acc:HGNC:7673]	ENSMMUT00000045391	8121	8260	+
ENSMMUG00000021330	KYNU	Kynureninase [Source:UniProtKB/TrEMBL;Acc:F6URB1]	ENSMMUT00000030020	1091	1260	+
ENSMMUG00000031483	H3F3B	H3 histone, family 3B (H3.3B) [Source:HGNC Symbol;Acc:HGNC:4765]	ENSMMUT00000045394	1	160	+
ENSMMUG00000006528	ARHGAP15	Rho GTPase-activating protein 15; Uncharacterized protein [Source:UniProtKB/TrEMBL;Acc:F7H6M3]	ENSMMUT00000009146	241	360	+
ENSMMUG00000011922	GTDC1	Uncharacterized protein [Source:UniProtKB/TrEMBL;Acc:F7GMT0]	ENSMMUT00000016699	1651	1900	+
ENSMMUG00000016486	SCARB1	scavenger receptor class B, member 1 [Source:HGNC Symbol;Acc:HGNC:1664]	ENSMMUT00000045387	247	370	+
ENSMMUG00000011434	PYCR2	Uncharacterized protein [Source:UniProtKB/TrEMBL;Acc:F7BA50]	ENSMMUT00000045383	1387	1565	+
ENSMMUG00000017902	DHX37	Uncharacterized protein [Source:UniProtKB/TrEMBL;Acc:F7F112]	ENSMMUT00000025156	3521	3855	+
ENSMMUG00000016845	ZEB2	Uncharacterized protein [Source:UniProtKB/TrEMBL;Acc:F7C2Y1]	ENSMMUT00000023668	3752	3900	+
ENSMMUG00000005213	BRI3BP	Uncharacterized protein [Source:UniProtKB/TrEMBL;Acc:F7CM63]	ENSMMUT00000007339	598	810	+
ENSMMUG00000022519		Uncharacterized protein [Source:UniProtKB/TrEMBL;Acc:F6YNW6]	ENSMMUT00000031678	1111	1212	+
ENSMMUG00000011117	AACS	acetoacetyl-CoA synthetase [Source:HGNC Symbol;Acc:HGNC:21298]	ENSMMUT00000015538	2421	2670	+
ENSMMUG00000006926			ENSMMUT00000009677	721	919	+
ENSMMUG00000006925		Uncharacterized protein [Source:UniProtKB/TrEMBL;Acc:F7EUN2]	ENSMMUT00000009676	451	620	+
ENSMMUG00000021288	ANKRD28	ankyrin repeat domain 28 [Source:HGNC Symbol;Acc:HGNC:29024]	ENSMMUT00000012772	2987	3240	+
ENSMMUG00000000134	SRP9	Signal recognition particle 9 kDa protein [Source:UniProtKB/TrEMBL;Acc:F7G5Y8]	ENSMMUT00000045368	241	530	+
ENSMMUG00000005767	SLC15A4	solute carrier family 15 (oligopeptide transporter), member 4 [Source:HGNC Symbol;Acc:HGNC:23090]	ENSMMUT00000008097	1261	1966	+
ENSMMUG00000003472	LBR	Lamin-B receptor; Uncharacterized protein [Source:UniProtKB/TrEMBL;Acc:F7EBC6]	ENSMMUT00000004915	3501	3654	+
ENSMMUG00000022694	RFTN1	Uncharacterized protein [Source:UniProtKB/TrEMBL;Acc:F7GSN3]	ENSMMUT00000031935	1341	1600	+
ENSMMUG00000023776	TBC1D5	TBC1 domain family, member 5 [Source:HGNC Symbol;Acc:HGNC:19166]	ENSMMUT00000033462	2281	2560	+
ENSMMUG00000012227	WDR26	Uncharacterized protein [Source:UniProtKB/TrEMBL;Acc:F7G637]	ENSMMUT00000045356	1781	2106	+
ENSMMUG00000019009	SATB1	DNA-binding protein SATB1 isoform 1; Uncharacterized protein [Source:UniProtKB/TrEMBL;Acc:F6XW50]	ENSMMUT00000045357	2581	2730	+
ENSMMUG00000005633	MMADHC	Methylmalonic aciduria and homocystinuria type D protein, mitochondrial; Uncharacterized protein [Source:UniProtKB/TrEMBL;Acc:F6WCH6]	ENSMMUT00000045355	421	520	+
ENSMMUG00000006992	RAB5A	Ras-related protein Rab-5A; Uncharacterized protein [Source:UniProtKB/TrEMBL;Acc:F7DQ40]	ENSMMUT00000009768	231	430	+
ENSMMUG00000022510	NVL	nuclear VCP-like [Source:HGNC Symbol;Acc:HGNC:8070]	ENSMMUT00000031669	1511	1708	+
ENSMMUG00000010331	MMP17	matrix metallopeptidase 17 (membrane-inserted) [Source:HGNC Symbol;Acc:HGNC:7163]	ENSMMUT00000014451	1351	1650	+
ENSMMUG00000008611	RIF1	replication timing regulatory factor 1 [Source:HGNC Symbol;Acc:HGNC:23207]	ENSMMUT00000012040	7251	7440	+
ENSMMUG00000015773	ULK1	unc-51 like autophagy activating kinase 1 [Source:HGNC Symbol;Acc:HGNC:12558]	ENSMMUT00000022141	1461	1680	+
ENSMMUG00000002400	DEGS1	Sphingolipid delta(4)-desaturase DES1; Uncharacterized protein [Source:UniProtKB/TrEMBL;Acc:F6PPX9]	ENSMMUT00000003410	911	1150	+
ENSMMUG00000000676	FBXO28	Uncharacterized protein [Source:UniProtKB/TrEMBL;Acc:F6Z0J2]	ENSMMUT00000000972	761	1320	+
ENSMMUG00000006353	RPL15	ribosomal protein L15 [Source:HGNC Symbol;Acc:HGNC:10306]	ENSMMUT00000008913	651	769	+
ENSMMUG00000006739	DDX51	DEAD (Asp-Glu-Ala-Asp) box polypeptide 51 [Source:HGNC Symbol;Acc:HGNC:20082]	ENSMMUT00000005660	2141	2299	+
ENSMMUG00000007371	TOP2B	Uncharacterized protein [Source:UniProtKB/TrEMBL;Acc:F7E563]	ENSMMUT00000010309	4481	4780	+
ENSMMUG00000005873	DISP1	Uncharacterized protein [Source:UniProtKB/TrEMBL;Acc:F6TLW0]	ENSMMUT00000008224	4341	4600	+
ENSMMUG00000015026	BROX	BRO1 domain-containing protein BROX; Uncharacterized protein [Source:UniProtKB/TrEMBL;Acc:F6V547]	ENSMMUT00000021067	1451	1690	+
ENSMMUG00000014790	NGLY1	N-glycanase 1 [Source:HGNC Symbol;Acc:HGNC:17646]	ENSMMUT00000020754	81	190	+
ENSMMUG00000001021	MIA3	melanoma inhibitory activity family, member 3 [Source:HGNC Symbol;Acc:HGNC:24008]	ENSMMUT00000001454	5591	5740	+
ENSMMUG00000010521	ARL5A	ADP-ribosylation factor-like 5A [Source:HGNC Symbol;Acc:HGNC:696]	ENSMMUT00000014723	1501	1600	+
ENSMMUG00000015463			ENSMMUT00000021685	1368	1553	+
ENSMMUG00000015467	ANKLE2	ankyrin repeat and LEM domain containing 2 [Source:HGNC Symbol;Acc:HGNC:29101]	ENSMMUT00000021691	691	1120	+
ENSMMUG00000010809		Uncharacterized protein [Source:UniProtKB/TrEMBL;Acc:F7GRV6]	ENSMMUT00000015113	1781	1880	+
ENSMMUG00000031451	GOLGA3	Uncharacterized protein [Source:UniProtKB/TrEMBL;Acc:F7GA16]	ENSMMUT00000045319	4391	4580	+
ENSMMUG00000020182	HLX	Uncharacterized protein [Source:UniProtKB/TrEMBL;Acc:F6UPM6]	ENSMMUT00000028397	1041	1300	+
ENSMMUG00000015468	CHFR	checkpoint with forkhead and ring finger domains, E3 ubiquitin protein ligase [Source:HGNC Symbol;Acc:HGNC:20455]	ENSMMUT00000045312	1961	2170	+
ENSMMUG00000031450		Uncharacterized protein [Source:UniProtKB/TrEMBL;Acc:F7GD62]	ENSMMUT00000045313	172	310	+
ENSMMUG00000013868	ZNF26	Uncharacterized protein [Source:UniProtKB/TrEMBL;Acc:F6RKS7]	ENSMMUT00000019461	1911	2150	+
ENSMMUG00000011607	NR4A2	Nuclear receptor subfamily 4 group A member 2; Uncharacterized protein [Source:UniProtKB/TrEMBL;Acc:F6PLH4]	ENSMMUT00000016263	1921	2429	+
ENSMMUG00000007784	RAB3GAP2	RAB3 GTPase activating protein subunit 2 (non-catalytic) [Source:HGNC Symbol;Acc:HGNC:17168]	ENSMMUT00000045297	4881	4984	+
ENSMMUG00000004897	GPD2	Glycerol-3-phosphate dehydrogenase, mitochondrial; Uncharacterized protein [Source:UniProtKB/TrEMBL;Acc:F7CJI8]	ENSMMUT00000006917	2097	2341	+
ENSMMUG00000010031	TGFBR2	Uncharacterized protein [Source:UniProtKB/TrEMBL;Acc:F6Q193]	ENSMMUT00000014004	2141	2360	+
ENSMMUG00000008608	STT3B	STT3B, subunit of the oligosaccharyltransferase complex (catalytic) [Source:HGNC Symbol;Acc:HGNC:30611]	ENSMMUT00000012035	2231	2499	+
ENSMMUG00000014176	CYTIP	Uncharacterized protein [Source:UniProtKB/TrEMBL;Acc:F7AT53]	ENSMMUT00000019894	711	830	+
ENSMMUG00000007783	IARS2	isoleucyl-tRNA synthetase 2, mitochondrial [Source:HGNC Symbol;Acc:HGNC:29685]	ENSMMUT00000010899	2651	2988	+
ENSMMUG00000018497	ACVR1	Activin receptor type-1; Uncharacterized protein [Source:UniProtKB/TrEMBL;Acc:F7A9J8]	ENSMMUT00000026013	2111	2270	+
ENSMMUG00000001443	CMTM6	CKLF-like MARVEL transmembrane domain-containing protein 6; Uncharacterized protein [Source:UniProtKB/TrEMBL;Acc:F7BRV9]	ENSMMUT00000002044	1341	1560	+
ENSMMUG00000008722	EPRS	glutamyl-prolyl-tRNA synthetase [Source:HGNC Symbol;Acc:HGNC:3418]	ENSMMUT00000012189	2931	3090	+
ENSMMUG00000006596	CNOT10	CCR4-NOT transcription complex subunit 10; Uncharacterized protein [Source:UniProtKB/TrEMBL;Acc:F7GGC1]	ENSMMUT00000045291	2461	2600	+
ENSMMUG00000011638	PKP4	plakophilin 4 [Source:HGNC Symbol;Acc:HGNC:9026]	ENSMMUT00000016310	3321	3440	+
ENSMMUG00000016917	UBP1	Uncharacterized protein; Upstream-binding protein 1 isoform b [Source:UniProtKB/TrEMBL;Acc:F7CJ26]	ENSMMUT00000045283	2413	2854	+
ENSMMUG00000022639	KCTD3	Uncharacterized protein [Source:UniProtKB/TrEMBL;Acc:F7FRD8]	ENSMMUT00000031856	2201	2610	+
ENSMMUG00000015558	PRPF6	pre-mRNA processing factor 6 [Source:HGNC Symbol;Acc:HGNC:15860]	ENSMMUT00000021821	311	460	+
ENSMMUG00000020719	2015-03-07	membrane-associated ring finger (C3HC4) 7, E3 ubiquitin protein ligase [Source:HGNC Symbol;Acc:HGNC:17393]	ENSMMUT00000029145	661	880	+
ENSMMUG00000015634	CENPF	Uncharacterized protein [Source:UniProtKB/TrEMBL;Acc:F6RLX8]	ENSMMUT00000021938	9241	9390	+
ENSMMUG00000020721		Uncharacterized protein [Source:UniProtKB/TrEMBL;Acc:F6PSN6]	ENSMMUT00000029147	5651	5830	+
ENSMMUG00000003702		Uncharacterized protein [Source:UniProtKB/TrEMBL;Acc:F6SFF8]	ENSMMUT00000027941	1446	1573	+
ENSMMUG00000000171	ZGPAT	zinc finger, CCCH-type with G patch domain [Source:HGNC Symbol;Acc:HGNC:15948]	ENSMMUT00000000256	3161	3350	+
ENSMMUG00000005210	RPS6KC1	ribosomal protein S6 kinase, 52kDa, polypeptide 1 [Source:HGNC Symbol;Acc:HGNC:10439]	ENSMMUT00000007336	2581	2690	+
ENSMMUG00000011735	ANGEL2	angel homolog 2 (Drosophila) [Source:HGNC Symbol;Acc:HGNC:30534]	ENSMMUT00000016433	131	230	+
ENSMMUG00000001680	TANK	TRAF family member-associated NF-kappa-B activator isoform a; Uncharacterized protein [Source:UniProtKB/TrEMBL;Acc:F7G3B1]	ENSMMUT00000002382	861	1050	+
ENSMMUG00000019287	NSL1	NSL1, MIS12 kinetochore complex component [Source:HGNC Symbol;Acc:HGNC:24548]	ENSMMUT00000027089	671	910	+
ENSMMUG00000013007	RTP4	receptor (chemosensory) transporter protein 4 [Source:HGNC Symbol;Acc:HGNC:23992]	ENSMMUT00000018242	471	640	+
ENSMMUG00000006168	GMEB2	glucocorticoid modulatory element binding protein 2 [Source:HGNC Symbol;Acc:HGNC:4371]	ENSMMUT00000008626	1445	1600	+
ENSMMUG00000006070	PRIC285	Uncharacterized protein [Source:UniProtKB/TrEMBL;Acc:F6W2L0]	ENSMMUT00000008486	4351	4550	+
ENSMMUG00000012185	ATF3	Uncharacterized protein [Source:UniProtKB/TrEMBL;Acc:F7FN44]	ENSMMUT00000045259	751	1160	+
ENSMMUG00000006064	PPDPF	Pancreatic progenitor cell differentiation and proliferation factor; Uncharacterized protein [Source:UniProtKB/TrEMBL;Acc:F6W3F1]	ENSMMUT00000008475	541	760	+
ENSMMUG00000019771	PPP2R5A	Serine/threonine-protein phosphatase 2A 56 kDa regulatory subunit alpha isoform isoform 1; Uncharacterized protein [Source:UniProtKB/TrEMBL;Acc:F7APV7]	ENSMMUT00000027790	1591	2022	+
ENSMMUG00000010176	DTL	Denticleless protein homolog; Uncharacterized protein [Source:UniProtKB/TrEMBL;Acc:F6SRD8]	ENSMMUT00000014207	1561	1863	+
ENSMMUG00000010174	INTS7	integrator complex subunit 7 [Source:HGNC Symbol;Acc:HGNC:24484]	ENSMMUT00000045249	2528	3092	+
ENSMMUG00000005216	NEK2	Serine/threonine-protein kinase Nek2 isoform 1; Uncharacterized protein [Source:UniProtKB/TrEMBL;Acc:F7C8J4]	ENSMMUT00000007344	1011	1170	+
ENSMMUG00000031427	TRAF5	TNF receptor-associated factor 5 [Source:HGNC Symbol;Acc:HGNC:12035]	ENSMMUT00000045246	1491	1820	+
ENSMMUG00000015330	CCDC50	Coiled-coil domain-containing protein 50 short isoform; Uncharacterized protein [Source:UniProtKB/TrEMBL;Acc:F6SPZ0]	ENSMMUT00000021498	1721	1900	+
ENSMMUG00000020383	RCOR3	Uncharacterized protein [Source:UniProtKB/TrEMBL;Acc:F6UG88]	ENSMMUT00000028663	1311	1845	+
ENSMMUG00000015911	ARFGAP1	ADP-ribosylation factor GTPase-activating protein 1 isoform a; Uncharacterized protein [Source:UniProtKB/TrEMBL;Acc:F7AMI0]	ENSMMUT00000022360	1225	1460	+
ENSMMUG00000009227	YTHDF1	Uncharacterized protein; YTH domain family protein 1 [Source:UniProtKB/TrEMBL;Acc:F7FNP8]	ENSMMUT00000045241	1701	1980	+
ENSMMUG00000018840	SCN3A	Uncharacterized protein [Source:UniProtKB/TrEMBL;Acc:F6ZAM3]	ENSMMUT00000026491	6251	6500	+
ENSMMUG00000005712	GID8	Protein C20orf11; Two hybrid-associated protein 1 with RanBPM; Uncharacterized protein [Source:UniProtKB/TrEMBL;Acc:F6U494]	ENSMMUT00000008016	551	895	+
ENSMMUG00000019310	DIDO1	Uncharacterized protein [Source:UniProtKB/TrEMBL;Acc:F6S3P4]	ENSMMUT00000027116	6701	6980	+
ENSMMUG00000009765	OPA1	Uncharacterized protein [Source:UniProtKB/TrEMBL;Acc:F6Y1N8]	ENSMMUT00000013660	3171	3340	+
ENSMMUG00000016848	SLCO4A1	solute carrier organic anion transporter family, member 4A1 [Source:HGNC Symbol;Acc:HGNC:10953]	ENSMMUT00000023672	2161	2490	+
ENSMMUG00000012032	ATP13A3	ATPase type 13A3 [Source:HGNC Symbol;Acc:HGNC:24113]	ENSMMUT00000016854	3445	3719	+
ENSMMUG00000019177	GALNT3	Uncharacterized protein [Source:UniProtKB/TrEMBL;Acc:F6R679]	ENSMMUT00000026944	1	380	+
ENSMMUG00000005006	RPS21	ribosomal protein S21 [Source:HGNC Symbol;Acc:HGNC:10409]	ENSMMUT00000007061	301	410	+
ENSMMUG00000010708	LSG1	large 60S subunit nuclear export GTPase 1 [Source:HGNC Symbol;Acc:HGNC:25652]	ENSMMUT00000014978	1831	2020	+
ENSMMUG00000012626	ADRM1	Uncharacterized protein [Source:UniProtKB/TrEMBL;Acc:F7F0I5]	ENSMMUT00000045214	1261	1406	+
ENSMMUG00000002021	BDH1	3-hydroxybutyrate dehydrogenase, type 1 [Source:HGNC Symbol;Acc:HGNC:1027]	ENSMMUT00000002862	811	1030	+
ENSMMUG00000016585	DLG1	Uncharacterized protein [Source:UniProtKB/TrEMBL;Acc:F6VPE3]	ENSMMUT00000023290	2261	2470	+
ENSMMUG00000012623	OSBPL2	oxysterol binding protein-like 2 [Source:HGNC Symbol;Acc:HGNC:15761]	ENSMMUT00000017707	1891	2104	+
ENSMMUG00000006215	STK39	serine threonine kinase 39 [Source:HGNC Symbol;Acc:HGNC:17717]	ENSMMUT00000008694	1831	2040	+
ENSMMUG00000014338	LASS6	Uncharacterized protein [Source:UniProtKB/TrEMBL;Acc:F7CYG3]	ENSMMUT00000045202	1301	1490	+
ENSMMUG00000012607	MTG2	mitochondrial ribosome-associated GTPase 2 [Source:HGNC Symbol;Acc:HGNC:16239]	ENSMMUT00000017676	851	1130	+
ENSMMUG00000018354	PSMA7	Uncharacterized protein [Source:UniProtKB/TrEMBL;Acc:F7H3W3]	ENSMMUT00000025794	481	768	+
ENSMMUG00000014084	LSM14B	Uncharacterized protein [Source:UniProtKB/TrEMBL;Acc:F7CDJ6]	ENSMMUT00000019776	891	1110	+
ENSMMUG00000019100	UBXN7	UBX domain protein 7 [Source:HGNC Symbol;Acc:HGNC:29119]	ENSMMUT00000026843	1261	1450	+
ENSMMUG00000002114	TFRC	Transferrin receptor 1; Transferrin receptor protein 1; Uncharacterized protein [Source:UniProtKB/TrEMBL;Acc:F6UX47]	ENSMMUT00000002982	2131	2440	+
ENSMMUG00000023567	MAPKAPK2	mitogen-activated protein kinase-activated protein kinase 2 [Source:HGNC Symbol;Acc:HGNC:6887]	ENSMMUT00000033149	2261	2380	+
ENSMMUG00000000972	TNK2	Uncharacterized protein [Source:UniProtKB/TrEMBL;Acc:F6SXS0]	ENSMMUT00000045187	2511	2680	+
ENSMMUG00000023566	DYRK3	dual-specificity tyrosine-(Y)-phosphorylation regulated kinase 3 [Source:HGNC Symbol;Acc:HGNC:3094]	ENSMMUT00000045186	1181	1330	+
ENSMMUG00000002528	EIF2D	Uncharacterized protein [Source:UniProtKB/TrEMBL;Acc:F7GM46]	ENSMMUT00000003596	1811	1940	+
ENSMMUG00000007560		Uncharacterized protein [Source:UniProtKB/TrEMBL;Acc:F6T0Y7]	ENSMMUT00000010569	451	610	+
ENSMMUG00000015390	NELFCD	negative elongation factor complex member C/D [Source:HGNC Symbol;Acc:HGNC:15934]	ENSMMUT00000021578	1851	2160	+
ENSMMUG00000010266	GNAS1	Uncharacterized protein [Source:UniProtKB/TrEMBL;Acc:F6PUT7]	ENSMMUT00000014360	2871	3050	+
ENSMMUG00000002526	IKBKE	Uncharacterized protein [Source:UniProtKB/TrEMBL;Acc:F7GM52]	ENSMMUT00000003591	1021	1430	+
ENSMMUG00000023062	UBR3	Uncharacterized protein [Source:UniProtKB/TrEMBL;Acc:F7GM61]	ENSMMUT00000032452	951	1080	+
ENSMMUG00000004318			ENSMMUT00000045165	521	680	+
ENSMMUG00000001833	STX16	Uncharacterized protein [Source:UniProtKB/TrEMBL;Acc:F7GQX4]	ENSMMUT00000002581	1251	1420	+
ENSMMUG00000000125	RAB22A	Ras-related protein Rab-22A; Uncharacterized protein [Source:UniProtKB/TrEMBL;Acc:F7H676]	ENSMMUT00000000180	511	880	+
ENSMMUG00000019944	PPP4R1	Putative serine/threonine-protein phosphatase 4 regulatory subunit 1-like protein; Uncharacterized protein [Source:UniProtKB/TrEMBL;Acc:F7FZT4]	ENSMMUT00000028028	1701	1914	+
ENSMMUG00000022589	PMEPA1	Solid tumor-associated 1 protein; Uncharacterized protein [Source:UniProtKB/TrEMBL;Acc:F6ZDP3]	ENSMMUT00000031785	711	951	+
ENSMMUG00000021426	SLC41A1	Solute carrier family 41 member 1; Uncharacterized protein [Source:UniProtKB/TrEMBL;Acc:F7EEX1]	ENSMMUT00000030159	4421	4600	+
ENSMMUG00000021227	RAB7L1	Ras-related protein Rab-7L1 isoform 1; Uncharacterized protein [Source:UniProtKB/TrEMBL;Acc:F7HTT7]	ENSMMUT00000029866	881	1100	+
ENSMMUG00000031391	RBM38	RNA-binding protein 38 isoform a; Uncharacterized protein [Source:UniProtKB/TrEMBL;Acc:F7GMA4]	ENSMMUT00000045156	821	1211	+
ENSMMUG00000015203	GORASP2	Uncharacterized protein [Source:UniProtKB/TrEMBL;Acc:F6W3P7]	ENSMMUT00000045152	1261	1430	+
ENSMMUG00000000252	RAE1	Uncharacterized protein; mRNA export factor; mRNA-associated protein mrnp 41 [Source:UniProtKB/TrEMBL;Acc:F6X9Q4]	ENSMMUT00000000372	1511	1660	+
ENSMMUG00000011189	TLK1	Uncharacterized protein [Source:UniProtKB/TrEMBL;Acc:F6V0J6]	ENSMMUT00000015657	2101	2270	+
ENSMMUG00000007295	CYBRD1	Uncharacterized protein [Source:UniProtKB/TrEMBL;Acc:F7F7W5]	ENSMMUT00000010187	1011	1170	+
ENSMMUG00000007301	DYNC1I2	Uncharacterized protein [Source:UniProtKB/TrEMBL;Acc:F7F396]	ENSMMUT00000010208	2001	2189	+
ENSMMUG00000031385	RPLP1	ribosomal protein, large, P1 [Source:HGNC Symbol;Acc:HGNC:10372]	ENSMMUT00000045143	1	110	+
ENSMMUG00000000074	RTFDC1	replication termination factor 2 domain containing 1 [Source:HGNC Symbol;Acc:HGNC:15890]	ENSMMUT00000000107	36	180	+
ENSMMUG00000007310	SLC25A12	Calcium-binding mitochondrial carrier protein Aralar1; Uncharacterized protein [Source:UniProtKB/TrEMBL;Acc:F7F2U3]	ENSMMUT00000010218	1981	2199	+
ENSMMUG00000018803	RBBP5	retinoblastoma binding protein 5 [Source:HGNC Symbol;Acc:HGNC:9888]	ENSMMUT00000026438	1301	1550	+
ENSMMUG00000007313	HAT1	histone acetyltransferase 1 [Source:HGNC Symbol;Acc:HGNC:4821]	ENSMMUT00000010219	953	1257	+
ENSMMUG00000000070	AURKA	Uncharacterized protein [Source:UniProtKB/TrEMBL;Acc:F7GNU0]	ENSMMUT00000045131	1281	1745	+
ENSMMUG00000018358	ZNF217	Uncharacterized protein [Source:UniProtKB/TrEMBL;Acc:F7GNV2]	ENSMMUT00000025798	3551	3660	+
ENSMMUG00000014672	ZAK	Mitogen-activated protein kinase kinase kinase MLT isoform 2; Uncharacterized protein [Source:UniProtKB/TrEMBL;Acc:F7FLS9]	ENSMMUT00000045114	2361	2560	+
ENSMMUG00000011236	MDM4	MDM4, p53 regulator [Source:HGNC Symbol;Acc:HGNC:6974]	ENSMMUT00000015723	1111	1320	+
ENSMMUG00000016563		Uncharacterized protein [Source:UniProtKB/TrEMBL;Acc:F7GQ93]	ENSMMUT00000023260	421	880	+
ENSMMUG00000014228	CDCA7	Cell division cycle-associated protein 7 isoform 2; Uncharacterized protein [Source:UniProtKB/TrEMBL;Acc:F7D7H5]	ENSMMUT00000019966	870	1160	+
ENSMMUG00000031377		Uncharacterized protein [Source:UniProtKB/TrEMBL;Acc:F7GQ97]	ENSMMUT00000045112	239	340	+
ENSMMUG00000016561	PPP1R15B	protein phosphatase 1, regulatory subunit 15B [Source:HGNC Symbol;Acc:HGNC:14951]	ENSMMUT00000023258	2341	2617	+
ENSMMUG00000001851			ENSMMUT00000002605	224	330	+
ENSMMUG00000021818	SP3	Sp3 transcription factor [Source:HGNC Symbol;Acc:HGNC:11208]	ENSMMUT00000030702	2051	2205	+
ENSMMUG00000007092	OLA1	Obg-like ATPase 1 isoform 1; Uncharacterized protein [Source:UniProtKB/TrEMBL;Acc:F7ERJ8]	ENSMMUT00000045105	591	771	+
ENSMMUG00000002761	ADNP	Activity-dependent neuroprotective protein; Activity-dependent neuroprotector homeobox protein; Uncharacterized protein [Source:UniProtKB/TrEMBL;Acc:F7H2B6]	ENSMMUT00000003924	3571	3900	+
ENSMMUG00000007878	PTPN1	Tyrosine-protein phosphatase non-receptor type [Source:UniProtKB/TrEMBL;Acc:F7B6C1]	ENSMMUT00000011037	1021	1190	+
ENSMMUG00000023006	CIR1	corepressor interacting with RBPJ, 1 [Source:HGNC Symbol;Acc:HGNC:24217]	ENSMMUT00000045096	901	1010	+
ENSMMUG00000010539	ZC3H11A	Uncharacterized protein [Source:UniProtKB/TrEMBL;Acc:F7D104]	ENSMMUT00000014745	5481	5670	+
ENSMMUG00000000757	RNF114	RING finger protein 114; Uncharacterized protein [Source:UniProtKB/TrEMBL;Acc:F6RK58]	ENSMMUT00000001088	21	160	+
ENSMMUG00000002715	SLC9A8	solute carrier family 9, subfamily A (NHE8, cation proton antiporter 8), member 8 [Source:HGNC Symbol;Acc:HGNC:20728]	ENSMMUT00000003864	1431	1720	+
ENSMMUG00000023009	SCRN3	Uncharacterized protein [Source:UniProtKB/TrEMBL;Acc:F6TI34]	ENSMMUT00000032378	1067	1275	+
ENSMMUG00000002124	B4GALT5	Beta-1,4-galactosyltransferase 5; Uncharacterized protein [Source:UniProtKB/TrEMBL;Acc:F6UWL7]	ENSMMUT00000002993	961	1573	+
ENSMMUG00000013010			ENSMMUT00000018245	1	130	+
ENSMMUG00000023623	ZNFX1	zinc finger, NFX1-type containing 1 [Source:HGNC Symbol;Acc:HGNC:29271]	ENSMMUT00000033229	5801	5910	+
ENSMMUG00000023621	DDX27	Putative ATP-dependent RNA helicase DDX27; Uncharacterized protein [Source:UniProtKB/TrEMBL;Acc:F7HB37]	ENSMMUT00000033228	1791	2320	+
ENSMMUG00000003954	ATP5G3	ATP synthase lipid-binding protein, mitochondrial isoform A; Uncharacterized protein [Source:UniProtKB/TrEMBL;Acc:F6ZG64]	ENSMMUT00000005606	1	204	+
ENSMMUG00000023498	KIAA1715	Protein lunapark; Uncharacterized protein [Source:UniProtKB/TrEMBL;Acc:F7E2N7]	ENSMMUT00000033059	1071	1300	+
ENSMMUG00000002302	STAU1	Uncharacterized protein [Source:UniProtKB/TrEMBL;Acc:F7AER2]	ENSMMUT00000003261	1871	2445	+
ENSMMUG00000011981	BTG2	Protein BTG2; Uncharacterized protein [Source:UniProtKB/TrEMBL;Acc:F7H251]	ENSMMUT00000016779	561	693	+
ENSMMUG00000019636	CSE1L	Exportin-2; Exportin-2 isoform 1; Uncharacterized protein [Source:UniProtKB/TrEMBL;Acc:F7AUV0]	ENSMMUT00000027581	3101	3200	+
ENSMMUG00000001861	NFE2L2	Uncharacterized protein [Source:UniProtKB/TrEMBL;Acc:F7ACY2]	ENSMMUT00000002623	1631	1760	+
ENSMMUG00000008502	AGPS	alkylglycerone phosphate synthase [Source:HGNC Symbol;Acc:HGNC:327]	ENSMMUT00000011881	841	1050	+
ENSMMUG00000000801	TMEM183A	Uncharacterized protein [Source:UniProtKB/TrEMBL;Acc:F6R1V8]	ENSMMUT00000001163	334	520	+
ENSMMUG00000015072	PREX1	phosphatidylinositol-3,4,5-trisphosphate-dependent Rac exchange factor 1 [Source:HGNC Symbol;Acc:HGNC:32594]	ENSMMUT00000021127	2621	2730	+
ENSMMUG00000007046	ADIPOR1	Adiponectin receptor protein 1; Uncharacterized protein [Source:UniProtKB/TrEMBL;Acc:F7F197]	ENSMMUT00000033260	1481	1870	+
ENSMMUG00000017849	KLHL12	Kelch-like protein 12; Uncharacterized protein [Source:UniProtKB/TrEMBL;Acc:F7DK52]	ENSMMUT00000025086	2320	2780	+
ENSMMUG00000012020	NCOA3	nuclear receptor coactivator 3 [Source:HGNC Symbol;Acc:HGNC:7670]	ENSMMUT00000016843	4371	4850	+
ENSMMUG00000015233	KDM5B	lysine (K)-specific demethylase 5B [Source:HGNC Symbol;Acc:HGNC:18039]	ENSMMUT00000021356	4591	4690	+
ENSMMUG00000015710	ZMYND8	Uncharacterized protein [Source:UniProtKB/TrEMBL;Acc:F6SF51]	ENSMMUT00000022057	3801	4054	+
ENSMMUG00000001926	RNPEP	Uncharacterized protein [Source:UniProtKB/TrEMBL;Acc:F6TYZ5]	ENSMMUT00000002725	1391	1630	+
ENSMMUG00000001924	TIMM17A	Mitochondrial import inner membrane translocase subunit Tim17-A; Uncharacterized protein [Source:UniProtKB/TrEMBL;Acc:F6TZ17]	ENSMMUT00000002722	571	770	+
ENSMMUG00000001916	IPO9	importin 9 [Source:HGNC Symbol;Acc:HGNC:19425]	ENSMMUT00000002714	3176	3500	+
ENSMMUG00000020642	CWC22	CWC22 spliceosome-associated protein homolog (S. cerevisiae) [Source:HGNC Symbol;Acc:HGNC:29322]	ENSMMUT00000029039	2281	2870	+
ENSMMUG00000008069	UBE2E3	Ubiquitin-conjugating enzyme E2 E3; Uncharacterized protein [Source:UniProtKB/TrEMBL;Acc:F7H158]	ENSMMUT00000011283	581	810	+
ENSMMUG00000000300	ITGA4	integrin, alpha 4 (antigen CD49D, alpha 4 subunit of VLA-4 receptor) [Source:HGNC Symbol;Acc:HGNC:6140]	ENSMMUT00000000438	3191	3320	+
ENSMMUG00000013508	LAD1	ladinin 1 [Source:HGNC Symbol;Acc:HGNC:6472]	ENSMMUT00000018967	591	890	+
ENSMMUG00000014277	SSFA2	Sperm-specific antigen 2 isoform 2; Uncharacterized protein [Source:UniProtKB/TrEMBL;Acc:F7BY73]	ENSMMUT00000020034	3471	3570	+
ENSMMUG00000014394	DNAJC10	DnaJ homolog subfamily C member 10; Uncharacterized protein [Source:UniProtKB/TrEMBL;Acc:F7BX23]	ENSMMUT00000020198	2601	2980	+
ENSMMUG00000015064	ELMO2	Engulfment and cell motility protein 2; Uncharacterized protein [Source:UniProtKB/TrEMBL;Acc:F6WWC5]	ENSMMUT00000021115	3441	3570	+
ENSMMUG00000005921	KIF21B	kinesin family member 21B [Source:HGNC Symbol;Acc:HGNC:29442]	ENSMMUT00000008286	2831	3070	+
ENSMMUG00000003683	CD40	CD40 molecule, TNF receptor superfamily member 5 [Source:HGNC Symbol;Acc:HGNC:11919]	ENSMMUT00000005213	1271	1454	+
ENSMMUG00000016555	NCOA5	Nuclear receptor coactivator 5; Uncharacterized protein [Source:UniProtKB/TrEMBL;Acc:F7FXV9]	ENSMMUT00000045016	641	890	+
ENSMMUG00000013702	ZNF335	zinc finger protein 335 [Source:HGNC Symbol;Acc:HGNC:15807]	ENSMMUT00000019246	4211	4438	+
ENSMMUG00000008265	GULP1	Uncharacterized protein [Source:UniProtKB/TrEMBL;Acc:F7FYB9]	ENSMMUT00000045005	1101	1330	+
ENSMMUG00000013697	PCIF1	PDX1 C-terminal inhibiting factor 1 [Source:HGNC Symbol;Acc:HGNC:16200]	ENSMMUT00000019234	1996	2369	+
ENSMMUG00000009960	CTSA	Uncharacterized protein [Source:UniProtKB/TrEMBL;Acc:F6RBN1]	ENSMMUT00000045002	2881	3030	+
ENSMMUG00000000009	PTPRC	Uncharacterized protein [Source:UniProtKB/TrEMBL;Acc:F7HTR2]	ENSMMUT00000000016	3591	3830	+
ENSMMUG00000012510	ACOT8	Uncharacterized protein [Source:UniProtKB/TrEMBL;Acc:F7EDA8]	ENSMMUT00000045001	981	1097	+
ENSMMUG00000021649	NEK7	Serine/threonine-protein kinase Nek7; Uncharacterized protein [Source:UniProtKB/TrEMBL;Acc:F7FA18]	ENSMMUT00000030466	1041	1190	+
ENSMMUG00000019335	RPL3	ribosomal protein L3 [Source:HGNC Symbol;Acc:HGNC:10332]	ENSMMUT00000027159	348	466	+
ENSMMUG00000011080	WDR75	WD repeat domain 75 [Source:HGNC Symbol;Acc:HGNC:25725]	ENSMMUT00000015492	2307	2582	+
ENSMMUG00000014310	ASNSD1	asparagine synthetase domain containing 1 [Source:HGNC Symbol;Acc:HGNC:24910]	ENSMMUT00000020080	1671	1780	+
ENSMMUG00000014316	ORMDL1	ORM1-like protein 1; Uncharacterized protein [Source:UniProtKB/TrEMBL;Acc:F7D5L1]	ENSMMUT00000020085	831	960	+
ENSMMUG00000014318	PMS1	PMS1 postmeiotic segregation increased 1 (S. cerevisiae) [Source:HGNC Symbol;Acc:HGNC:9121]	ENSMMUT00000044977	2230	2360	+
ENSMMUG00000003407	SYS1	Protein SYS1 homolog isoform a; Protein SYS1-like protein; Uncharacterized protein [Source:UniProtKB/TrEMBL;Acc:F7FE74]	ENSMMUT00000004819	434	590	+
ENSMMUG00000003406	SDC4	Syndecan [Source:UniProtKB/TrEMBL;Acc:F7FE95]	ENSMMUT00000004816	1561	1770	+
ENSMMUG00000003260		Uncharacterized protein [Source:UniProtKB/TrEMBL;Acc:F7DJ34]	ENSMMUT00000004609	1	160	+
ENSMMUG00000007289	MFSD6	Major facilitator superfamily domain-containing protein 6; Uncharacterized protein [Source:UniProtKB/TrEMBL;Acc:F7FBJ5]	ENSMMUT00000010182	631	810	+
ENSMMUG00000022664	NAB1	NGFI-A-binding protein 1; Uncharacterized protein [Source:UniProtKB/TrEMBL;Acc:F7AIE9]	ENSMMUT00000031891	1520	1688	+
ENSMMUG00000013211	TOMM34	translocase of outer mitochondrial membrane 34 [Source:HGNC Symbol;Acc:HGNC:15746]	ENSMMUT00000018533	531	630	+
ENSMMUG00000005612	GLS	Uncharacterized protein [Source:UniProtKB/TrEMBL;Acc:F6WK20]	ENSMMUT00000044972	4405	4578	+
ENSMMUG00000005613	STAT1	Signal transducer and activator of transcription 1-alpha/beta isoform alpha; Uncharacterized protein [Source:UniProtKB/TrEMBL;Acc:F6WE02]	ENSMMUT00000007897	2621	2790	+
ENSMMUG00000013206	YWHAB	14-3-3 protein beta/alpha; Uncharacterized protein [Source:UniProtKB/TrEMBL;Acc:F6XFG9]	ENSMMUT00000018526	2521	2750	+
ENSMMUG00000005617	STAT4	Uncharacterized protein [Source:UniProtKB/TrEMBL;Acc:F6WDY6]	ENSMMUT00000007899	781	970	+
ENSMMUG00000013969	SERINC3	Serine incorporator 3; Tumor differentially expressed protein 1; Uncharacterized protein [Source:UniProtKB/TrEMBL;Acc:F6S622]	ENSMMUT00000019608	1411	1722	+
ENSMMUG00000009460	OBFC2A	Uncharacterized protein [Source:UniProtKB/TrEMBL;Acc:F7A9C3]	ENSMMUT00000013199	971	1146	+
ENSMMUG00000005621	SLC39A10	Uncharacterized protein; Zinc transporter ZIP10 [Source:UniProtKB/TrEMBL;Acc:F6WDC7]	ENSMMUT00000044946	2891	3020	+
ENSMMUG00000003486	RGS1	Uncharacterized protein [Source:UniProtKB/TrEMBL;Acc:F7E7H3]	ENSMMUT00000004937	771	1020	+
ENSMMUG00000005626	STK17B	serine/threonine kinase 17b [Source:HGNC Symbol;Acc:HGNC:11396]	ENSMMUT00000007913	831	1190	+
ENSMMUG00000022587			ENSMMUT00000031777	315	483	+
ENSMMUG00000016857	PTGS2	Uncharacterized protein [Source:UniProtKB/TrEMBL;Acc:F7BWZ9]	ENSMMUT00000023682	1801	1969	+
ENSMMUG00000005627	HECW2	Uncharacterized protein [Source:UniProtKB/TrEMBL;Acc:F6WD73]	ENSMMUT00000007914	21	210	+
ENSMMUG00000008643	GTF3C3	General transcription factor 3C polypeptide 3 isoform 1; Uncharacterized protein [Source:UniProtKB/TrEMBL;Acc:F7F8I5]	ENSMMUT00000012085	3332	3470	+
ENSMMUG00000006742			ENSMMUT00000044930	901	1030	+
ENSMMUG00000011124			ENSMMUT00000015549	335	448	+
ENSMMUG00000022425	ANKRD44	Uncharacterized protein [Source:UniProtKB/TrEMBL;Acc:F6XBK4]	ENSMMUT00000031547	1441	1600	+
ENSMMUG00000020458	CHD6	chromodomain helicase DNA binding protein 6 [Source:HGNC Symbol;Acc:HGNC:19057]	ENSMMUT00000028784	7831	8062	+
ENSMMUG00000022430	SF3B1	Splicing factor 3B subunit 1 isoform 1; Uncharacterized protein [Source:UniProtKB/TrEMBL;Acc:F6X4D3]	ENSMMUT00000031550	3021	3150	+
ENSMMUG00000013884	IVNS1ABP	Uncharacterized protein [Source:UniProtKB/TrEMBL;Acc:F6R564]	ENSMMUT00000019491	511	640	+
ENSMMUG00000005905	PLCG1	1-phosphatidylinositol-4,5-bisphosphate phosphodiesterase gamma-1 isoform a; Uncharacterized protein [Source:UniProtKB/TrEMBL;Acc:F6WWF3]	ENSMMUT00000008266	4201	4430	+
ENSMMUG00000023810	MARS2	methionyl-tRNA synthetase 2, mitochondrial [Source:HGNC Symbol;Acc:HGNC:25133]	ENSMMUT00000033506	1371	1904	+
ENSMMUG00000011112	TOP1	Uncharacterized protein [Source:UniProtKB/TrEMBL;Acc:F6TZC2]	ENSMMUT00000015533	801	1010	+
ENSMMUG00000003385	DHX35	DEAH (Asp-Glu-Ala-His) box polypeptide 35 [Source:HGNC Symbol;Acc:HGNC:15861]	ENSMMUT00000004782	2651	2800	+
ENSMMUG00000013879	TRMT1L	Uncharacterized protein [Source:UniProtKB/TrEMBL;Acc:F6RCA6]	ENSMMUT00000019482	2221	2420	+
ENSMMUG00000023167	TYW5	tRNA-yW synthesizing protein 5 [Source:HGNC Symbol;Acc:HGNC:26754]	ENSMMUT00000032587	581	930	+
ENSMMUG00000023168	C2orf47	chromosome 2 open reading frame 47 [Source:HGNC Symbol;Acc:HGNC:26198]	ENSMMUT00000032588	1131	1290	+
ENSMMUG00000008101	SPATS2L	SPATS2-like protein isoform a; Uncharacterized protein [Source:UniProtKB/TrEMBL;Acc:F7HIW4]	ENSMMUT00000011324	1131	1500	+
ENSMMUG00000008102	KCTD18	Uncharacterized protein [Source:UniProtKB/TrEMBL;Acc:F7HIV8]	ENSMMUT00000011326	1299	1475	+
ENSMMUG00000003378	ACTR5	Uncharacterized protein [Source:UniProtKB/TrEMBL;Acc:F7FIM2]	ENSMMUT00000004776	1871	2183	+
ENSMMUG00000019515	FAM129A	family with sequence similarity 129, member A [Source:HGNC Symbol;Acc:HGNC:16784]	ENSMMUT00000027414	2641	2800	+
ENSMMUG00000017350	RALGAPB	Uncharacterized protein [Source:UniProtKB/TrEMBL;Acc:F7B4G0]	ENSMMUT00000044899	5111	5330	+
ENSMMUG00000005410	EDEM3	Uncharacterized protein [Source:UniProtKB/TrEMBL;Acc:F7GT33]	ENSMMUT00000007610	3911	4090	+
ENSMMUG00000022202	BZW1	basic leucine zipper and W2 domains 1 [Source:HGNC Symbol;Acc:HGNC:18380]	ENSMMUT00000031227	2601	2708	+
ENSMMUG00000006640	CLK1	Uncharacterized protein [Source:UniProtKB/TrEMBL;Acc:F7B4G9]	ENSMMUT00000044898	121	440	+
ENSMMUG00000016409	TSEN15	Uncharacterized protein [Source:UniProtKB/TrEMBL;Acc:F7FYG5]	ENSMMUT00000023039	1704	1888	+
ENSMMUG00000006639	NIF3L1	NIF3-like protein 1 isoform 1; Uncharacterized protein [Source:UniProtKB/TrEMBL;Acc:F7B590]	ENSMMUT00000044895	1333	1520	+
ENSMMUG00000016399	RGL1	Uncharacterized protein [Source:UniProtKB/TrEMBL;Acc:F7FYX4]	ENSMMUT00000023027	2681	2840	+
ENSMMUG00000014460	ORC2	origin recognition complex, subunit 2 [Source:HGNC Symbol;Acc:HGNC:8488]	ENSMMUT00000020284	2081	2260	+
ENSMMUG00000018924	RPRD1B	Cell cycle-related and expression-elevated protein in tumor; Regulation of nuclear pre-mRNA domain-containing protein 1B; Uncharacterized protein [Source:UniProtKB/TrEMBL;Acc:F6ZTV4]	ENSMMUT00000026603	1041	1517	+
ENSMMUG00000018923	TTI1	TELO2 interacting protein 1 [Source:HGNC Symbol;Acc:HGNC:29029]	ENSMMUT00000026601	1591	1770	+
ENSMMUG00000018460	NCF2	Uncharacterized protein [Source:UniProtKB/TrEMBL;Acc:F7HCR8]	ENSMMUT00000025952	341	540	+
ENSMMUG00000012310	CFLAR	CASP8 and FADD-like apoptosis regulator [Source:HGNC Symbol;Acc:HGNC:1876]	ENSMMUT00000044879	1501	1690	+
ENSMMUG00000018458	SMG7	Uncharacterized protein [Source:UniProtKB/TrEMBL;Acc:F7C550]	ENSMMUT00000025950	4481	4800	+
ENSMMUG00000017224	CTNNBL1	Uncharacterized protein [Source:UniProtKB/TrEMBL;Acc:F7BBR8]	ENSMMUT00000024215	1371	1520	+
ENSMMUG00000015940	BLCAP	Bladder cancer-associated protein; Uncharacterized protein [Source:UniProtKB/TrEMBL;Acc:F7AJE1]	ENSMMUT00000022417	1601	2005	+
ENSMMUG00000014889			ENSMMUT00000020891	266	370	+
ENSMMUG00000010363	RPN2	ribophorin II [Source:HGNC Symbol;Acc:HGNC:10382]	ENSMMUT00000044862	2021	2380	+
ENSMMUG00000011505	BET1L	Uncharacterized protein [Source:UniProtKB/TrEMBL;Acc:F7D212]	ENSMMUT00000016108	381	510	+
ENSMMUG00000011506	RIC8A	RIC8 guanine nucleotide exchange factor A [Source:HGNC Symbol;Acc:HGNC:29550]	ENSMMUT00000016112	1931	2110	+
ENSMMUG00000023812	TRAK2	Trafficking kinesin-binding protein 2; Uncharacterized protein [Source:UniProtKB/TrEMBL;Acc:F7HR24]	ENSMMUT00000033510	3171	3488	+
ENSMMUG00000004625	ATHL1	Uncharacterized protein [Source:UniProtKB/TrEMBL;Acc:F6PZB6]	ENSMMUT00000006541	41	190	+
ENSMMUG00000018141	STRADB	Uncharacterized protein [Source:UniProtKB/TrEMBL;Acc:F6UPQ9]	ENSMMUT00000025494	1511	1670	+
ENSMMUG00000013257	IFITM1	interferon induced transmembrane protein 1 [Source:HGNC Symbol;Acc:HGNC:5412]	ENSMMUT00000018611	1	150	+
ENSMMUG00000013255		Uncharacterized protein [Source:UniProtKB/TrEMBL;Acc:F6ZDA2]	ENSMMUT00000018609	511	622	+
ENSMMUG00000005635	DHX9	ATP-dependent RNA helicase A; Uncharacterized protein [Source:UniProtKB/TrEMBL;Acc:F6W5Y4]	ENSMMUT00000007925	3791	3930	+
ENSMMUG00000002091	SAMHD1	Uncharacterized protein [Source:UniProtKB/TrEMBL;Acc:F6WNQ8]	ENSMMUT00000044855	1521	1730	+
ENSMMUG00000010782	PTDSS2	phosphatidylserine synthase 2 [Source:HGNC Symbol;Acc:HGNC:15463]	ENSMMUT00000015065	1311	1460	+
ENSMMUG00000010783	RNH1	Ribonuclease/angiogenin inhibitor 1; Uncharacterized protein [Source:UniProtKB/TrEMBL;Acc:F7CA88]	ENSMMUT00000044852	2661	2779	+
ENSMMUG00000005576	DSN1	Uncharacterized protein [Source:UniProtKB/TrEMBL;Acc:F7CAB7]	ENSMMUT00000044848	1461	1630	+
ENSMMUG00000005638	RGS16	Uncharacterized protein [Source:UniProtKB/TrEMBL;Acc:F6W5V5]	ENSMMUT00000007928	1659	1886	+
ENSMMUG00000021661	LRRC56	Uncharacterized protein [Source:UniProtKB/TrEMBL;Acc:F7F5I8]	ENSMMUT00000030485	3281	3490	+
ENSMMUG00000000582	NOP58	Nucleolar protein 58; Uncharacterized protein [Source:UniProtKB/TrEMBL;Acc:F6ZQ04]	ENSMMUT00000000845	1361	1870	+
ENSMMUG00000021665	RASSF7	Ras association (RalGDS/AF-6) domain family (N-terminal) member 7 [Source:HGNC Symbol;Acc:HGNC:1166]	ENSMMUT00000044844	551	730	+
ENSMMUG00000008195	TGIF2	Uncharacterized protein [Source:UniProtKB/TrEMBL;Acc:F7GWV2]	ENSMMUT00000044839	606	850	+
ENSMMUG00000016447	MYL9	Uncharacterized protein [Source:UniProtKB/TrEMBL;Acc:F7GF88]	ENSMMUT00000023093	1001	1150	+
ENSMMUG00000020691	AAR2	AAR2 splicing factor homolog (S. cerevisiae) [Source:HGNC Symbol;Acc:HGNC:15886]	ENSMMUT00000029105	301	490	+
ENSMMUG00000031286	IER5	Immediate early response gene 5 protein [Source:UniProtKB/TrEMBL;Acc:H9FB72]	ENSMMUT00000044834	711	930	+
ENSMMUG00000020023	MR1	Uncharacterized protein [Source:UniProtKB/TrEMBL;Acc:F7GIY9]	ENSMMUT00000028140	831	1320	+
ENSMMUG00000002660	DEAF1	DEAF1 transcription factor [Source:HGNC Symbol;Acc:HGNC:14677]	ENSMMUT00000003795	1411	1630	+
ENSMMUG00000020019	KIAA1614	KIAA1614 [Source:HGNC Symbol;Acc:HGNC:29327]	ENSMMUT00000028136	1751	1910	+
ENSMMUG00000012848	XPR1	xenotropic and polytropic retrovirus receptor 1 [Source:HGNC Symbol;Acc:HGNC:12827]	ENSMMUT00000018029	2361	2550	+
ENSMMUG00000009306	SCAND1	SCAN domain-containing protein 1; Uncharacterized protein [Source:UniProtKB/TrEMBL;Acc:F7H1F7]	ENSMMUT00000013004	598	770	+
ENSMMUG00000016715	LRDD	Uncharacterized protein [Source:UniProtKB/TrEMBL;Acc:F6VDQ1]	ENSMMUT00000023484	2521	2700	+
ENSMMUG00000012047	QSOX1	quiescin Q6 sulfhydryl oxidase 1 [Source:HGNC Symbol;Acc:HGNC:9756]	ENSMMUT00000016874	2677	2900	+
ENSMMUG00000031284	RBM39	Uncharacterized protein [Source:UniProtKB/TrEMBL;Acc:F6PLM4]	ENSMMUT00000016253	471	600	+
ENSMMUG00000010951	NFS1	Uncharacterized protein [Source:UniProtKB/TrEMBL;Acc:F7BXK5]	ENSMMUT00000044804	1851	2250	+
ENSMMUG00000020625	PNPLA2	patatin-like phospholipase domain containing 2 [Source:HGNC Symbol;Acc:HGNC:30802]	ENSMMUT00000029020	1371	1480	+
ENSMMUG00000020960	CPNE1	copine I [Source:HGNC Symbol;Acc:HGNC:2314]	ENSMMUT00000029479	876	1030	+
ENSMMUG00000003618	CHID1	Chitinase domain-containing protein 1 isoform a; Uncharacterized protein [Source:UniProtKB/TrEMBL;Acc:F6QEE2]	ENSMMUT00000005126	1261	1450	+
ENSMMUG00000003620	AP2A2	adaptor-related protein complex 2, alpha 2 subunit [Source:HGNC Symbol;Acc:HGNC:562]	ENSMMUT00000005127	1801	2000	+
ENSMMUG00000020959	SPAG4	sperm associated antigen 4 [Source:HGNC Symbol;Acc:HGNC:11214]	ENSMMUT00000029475	1291	1450	+
ENSMMUG00000014873	TOR1AIP1	torsin A interacting protein 1 [Source:HGNC Symbol;Acc:HGNC:29456]	ENSMMUT00000020861	1547	2010	+
ENSMMUG00000023456	ERGIC3	ERGIC and golgi 3 [Source:HGNC Symbol;Acc:HGNC:15927]	ENSMMUT00000033006	1221	1335	+
ENSMMUG00000001054	EEF1B2	Elongation factor 1-beta; Uncharacterized protein [Source:UniProtKB/TrEMBL;Acc:F6QN95]	ENSMMUT00000001502	511	732	+
ENSMMUG00000003104	TOLLIP	Uncharacterized protein [Source:UniProtKB/TrEMBL;Acc:F7DRQ6]	ENSMMUT00000004391	791	1010	+
ENSMMUG00000011211	BRSK2	BR serine/threonine kinase 2 [Source:HGNC Symbol;Acc:HGNC:11405]	ENSMMUT00000015683	3061	3177	+
ENSMMUG00000007335	CEP250	centrosomal protein 250kDa [Source:HGNC Symbol;Acc:HGNC:1859]	ENSMMUT00000010254	6841	7260	+
ENSMMUG00000003768	SOAT1	sterol O-acyltransferase 1 [Source:HGNC Symbol;Acc:HGNC:11177]	ENSMMUT00000005330	2341	2520	+
ENSMMUG00000017450		Uncharacterized protein [Source:UniProtKB/TrEMBL;Acc:F6TYM1]	ENSMMUT00000044778	601	880	+
ENSMMUG00000017735	FASTKD2	FAST kinase domains 2 [Source:HGNC Symbol;Acc:HGNC:29160]	ENSMMUT00000024934	7	790	+
ENSMMUG00000013352			ENSMMUT00000018740	1151	1400	+
ENSMMUG00000010403	UQCC	Uncharacterized protein [Source:UniProtKB/TrEMBL;Acc:F7AU87]	ENSMMUT00000014559	781	890	+
ENSMMUG00000022601	CREB1	Cyclic AMP-responsive element-binding protein 1 isoform A; Uncharacterized protein [Source:UniProtKB/TrEMBL;Acc:F6Z7F5]	ENSMMUT00000031802	1201	1510	+
ENSMMUG00000006261	TOR3A	Uncharacterized protein [Source:UniProtKB/TrEMBL;Acc:F7FUL9]	ENSMMUT00000008765	1141	1426	+
ENSMMUG00000006260	FAM20B	Glycosaminoglycan xylosylkinase; Uncharacterized protein [Source:UniProtKB/TrEMBL;Acc:F7H529]	ENSMMUT00000008763	1291	1787	+
ENSMMUG00000022602	METTL21A	Methyltransferase-like protein 21A; Uncharacterized protein [Source:UniProtKB/TrEMBL;Acc:F6Z7E5]	ENSMMUT00000031804	641	830	+
ENSMMUG00000010032	EDEM2	ER degradation-enhancing alpha-mannosidase-like 2; ER degradation-enhancing alpha-mannosidase-like 2 isoform 1; Uncharacterized protein [Source:UniProtKB/TrEMBL;Acc:F6Q1A3]	ENSMMUT00000014003	1331	1853	+
ENSMMUG00000017551	RALGPS2	Uncharacterized protein [Source:UniProtKB/TrEMBL;Acc:F6TH23]	ENSMMUT00000024689	1668	2135	+
ENSMMUG00000000229	TRPC4AP	Short transient receptor potential channel 4-associated protein; Uncharacterized protein [Source:UniProtKB/TrEMBL;Acc:F6XAU6]	ENSMMUT00000000342	2041	2220	+
ENSMMUG00000017524	PIKFYVE	phosphoinositide kinase, FYVE finger containing [Source:HGNC Symbol;Acc:HGNC:23785]	ENSMMUT00000024646	6301	6612	+
ENSMMUG00000002043	CD81	CD81 antigen; Uncharacterized protein [Source:UniProtKB/TrEMBL;Acc:F6WY45]	ENSMMUT00000002892	1341	1462	+
ENSMMUG00000001152	NUF2	Kinetochore protein Nuf2; Uncharacterized protein [Source:UniProtKB/TrEMBL;Acc:F6RPT5]	ENSMMUT00000001627	1001	1390	+
ENSMMUG00000031263			ENSMMUT00000025615	1	109	+
ENSMMUG00000015948	MGST3	Microsomal glutathione S-transferase 3; Uncharacterized protein [Source:UniProtKB/TrEMBL;Acc:F7B1G5]	ENSMMUT00000044729	41	140	+
ENSMMUG00000007753	NAP1L4	nucleosome assembly protein 1-like 4 [Source:HGNC Symbol;Acc:HGNC:7640]	ENSMMUT00000010857	1021	1120	+
ENSMMUG00000017682	PIGU	Uncharacterized protein [Source:UniProtKB/TrEMBL;Acc:F6UA73]	ENSMMUT00000024856	1432	1800	+
ENSMMUG00000000511	CARS	Uncharacterized protein [Source:UniProtKB/TrEMBL;Acc:F6YB56]	ENSMMUT00000044727	2061	2470	+
ENSMMUG00000010520	LANCL1	LanC-like protein 1; Uncharacterized protein [Source:UniProtKB/TrEMBL;Acc:F7B2A9]	ENSMMUT00000014719	1181	1423	+
ENSMMUG00000015946	ALDH9A1	aldehyde dehydrogenase 9 family, member A1 [Source:HGNC Symbol;Acc:HGNC:412]	ENSMMUT00000022424	1311	1460	+
ENSMMUG00000005585	TMCO1	Transmembrane and coiled-coil domain-containing protein 1; Uncharacterized protein [Source:UniProtKB/TrEMBL;Acc:F7G4J4]	ENSMMUT00000007853	121	402	+
ENSMMUG00000017681	MAP1LC3A	Microtubule-associated proteins 1A/1B light chain 3A isoform a; Uncharacterized protein [Source:UniProtKB/TrEMBL;Acc:F6UA91]	ENSMMUT00000024855	761	945	+
ENSMMUG00000000565	UCK2	Uridine kinase [Source:UniProtKB/TrEMBL;Acc:F6ZWL3]	ENSMMUT00000000821	991	1290	+
ENSMMUG00000017789	POGK	Pogo transposable element with KRAB domain; Uncharacterized protein [Source:UniProtKB/TrEMBL;Acc:F7EU02]	ENSMMUT00000025001	1951	2220	+
ENSMMUG00000016306		Adenosylhomocysteinase [Source:UniProtKB/TrEMBL;Acc:F7GT77]	ENSMMUT00000022902	1626	1937	+
ENSMMUG00000011976	DHCR7	7-dehydrocholesterol reductase [Source:HGNC Symbol;Acc:HGNC:2860]	ENSMMUT00000016774	1251	1430	+
ENSMMUG00000009184	MPZL1	Uncharacterized protein [Source:UniProtKB/TrEMBL;Acc:F7HPB4]	ENSMMUT00000012838	591	720	+
ENSMMUG00000010389	DCAF6	Uncharacterized protein [Source:UniProtKB/TrEMBL;Acc:F7BF92]	ENSMMUT00000014535	1711	2120	+
ENSMMUG00000012318	ATIC	5-aminoimidazole-4-carboxamide ribonucleotide formyltransferase/IMP cyclohydrolase [Source:HGNC Symbol;Acc:HGNC:794]	ENSMMUT00000017264	41	180	+
ENSMMUG00000021166	TIPRL	TOR signaling pathway regulator [Source:HGNC Symbol;Acc:HGNC:30231]	ENSMMUT00000029776	651	820	+
ENSMMUG00000010204		40S ribosomal protein S12 [Source:UniProtKB/TrEMBL;Acc:F6SIP5]	ENSMMUT00000014245	307	468	+
ENSMMUG00000001816	MAPRE1	microtubule-associated protein, RP/EB family, member 1 [Source:HGNC Symbol;Acc:HGNC:6890]	ENSMMUT00000002556	741	870	+
ENSMMUG00000022721	COMMD7	COMM domain containing 7 [Source:HGNC Symbol;Acc:HGNC:16223]	ENSMMUT00000044684	424	535	+
ENSMMUG00000010128	IGHMBP2	immunoglobulin mu binding protein 2 [Source:HGNC Symbol;Acc:HGNC:5542]	ENSMMUT00000014141	1851	2470	+
ENSMMUG00000010085	XCL1	Macaca mulatta chemokine (C motif) ligand 1 (XCL1), mRNA. [Source:RefSeq mRNA;Acc:NM_001032947]	ENSMMUT00000014080	331	463	+
ENSMMUG00000012897	KIF3B	Kinesin-like protein KIF3B; Microtubule plus end-directed kinesin motor 3B; Uncharacterized protein [Source:UniProtKB/TrEMBL;Acc:F6S877]	ENSMMUT00000018090	911	1150	+
ENSMMUG00000008979	POFUT1	protein O-fucosyltransferase 1 [Source:HGNC Symbol;Acc:HGNC:14988]	ENSMMUT00000008842	986	1200	+
ENSMMUG00000000118	PLAGL2	Pleiomorphic adenoma-like protein 2; Uncharacterized protein; Zinc finger protein PLAGL2 [Source:UniProtKB/TrEMBL;Acc:F7H8A5]	ENSMMUT00000000169	761	1075	+
ENSMMUG00000017416	TM9SF4	Uncharacterized protein [Source:UniProtKB/TrEMBL;Acc:F7CJR7]	ENSMMUT00000044673	3651	3920	+
ENSMMUG00000016213	PPP6R3	protein phosphatase 6, regulatory subunit 3 [Source:HGNC Symbol;Acc:HGNC:1173]	ENSMMUT00000022783	4241	4470	+
ENSMMUG00000013039	SLC19A2	Uncharacterized protein [Source:UniProtKB/TrEMBL;Acc:F7H816]	ENSMMUT00000018296	1501	1890	+
ENSMMUG00000000973	PDRG1	Uncharacterized protein; p53 and DNA damage-regulated protein 1 [Source:UniProtKB/TrEMBL;Acc:F6SXT9]	ENSMMUT00000001389	831	930	+
ENSMMUG00000019253	C11orf24	chromosome 11 open reading frame 24 [Source:HGNC Symbol;Acc:HGNC:1174]	ENSMMUT00000027042	1011	1130	+
ENSMMUG00000000966	TPX2	Uncharacterized protein [Source:UniProtKB/TrEMBL;Acc:F6QQI0]	ENSMMUT00000001379	2711	2950	+
ENSMMUG00000023192	CHKA	choline kinase alpha [Source:HGNC Symbol;Acc:HGNC:1937]	ENSMMUT00000032626	1401	1600	+
ENSMMUG00000023190	TCIRG1	Uncharacterized protein [Source:UniProtKB/TrEMBL;Acc:F7EFI0]	ENSMMUT00000032623	901	1040	+
ENSMMUG00000017964	PECR	Uncharacterized protein [Source:UniProtKB/TrEMBL;Acc:F7DTT0]	ENSMMUT00000025238	211	344	+
ENSMMUG00000005119	HM13	Minor histocompatibility antigen H13 isoform 3; Uncharacterized protein [Source:UniProtKB/TrEMBL;Acc:F7BXY7]	ENSMMUT00000007221	1591	1730	+
ENSMMUG00000023184	UNC93B1	Uncharacterized protein [Source:UniProtKB/TrEMBL;Acc:F7EJ77]	ENSMMUT00000032611	2181	2298	+
ENSMMUG00000019539	SMARCAL1	Uncharacterized protein [Source:UniProtKB/TrEMBL;Acc:F7CK94]	ENSMMUT00000027448	761	960	+
ENSMMUG00000016583	SCYL3	SCY1-like 3 (S. cerevisiae) [Source:HGNC Symbol;Acc:HGNC:19285]	ENSMMUT00000023289	2531	2700	+
ENSMMUG00000018528	NUDT8	nudix (nucleoside diphosphate linked moiety X)-type motif 8 [Source:HGNC Symbol;Acc:HGNC:8055]	ENSMMUT00000026051	331	510	+
ENSMMUG00000005262	ZCCHC3	Uncharacterized protein [Source:UniProtKB/TrEMBL;Acc:F7BPQ3]	ENSMMUT00000007406	1801	1920	+
ENSMMUG00000011827	CDK2AP2	Cyclin-dependent kinase 2-associated protein 2; Uncharacterized protein [Source:UniProtKB/TrEMBL;Acc:F7H786]	ENSMMUT00000016564	1101	1310	+
ENSMMUG00000011821	PITPNM1	phosphatidylinositol transfer protein, membrane-associated 1 [Source:HGNC Symbol;Acc:HGNC:9003]	ENSMMUT00000016563	3531	3770	+
ENSMMUG00000012601	RBCK1	Uncharacterized protein [Source:UniProtKB/TrEMBL;Acc:F7CKH7]	ENSMMUT00000044638	2391	2550	+
ENSMMUG00000004461	TBC1D20	TBC1 domain family, member 20 [Source:HGNC Symbol;Acc:HGNC:16133]	ENSMMUT00000006318	811	1090	+
ENSMMUG00000031224	CSNK2A1	Casein kinase II subunit alpha isoform a; Uncharacterized protein [Source:UniProtKB/TrEMBL;Acc:F7CKR9]	ENSMMUT00000044635	2391	2520	+
ENSMMUG00000005483	RPS6KB2	ribosomal protein S6 kinase, 70kDa, polypeptide 2 [Source:HGNC Symbol;Acc:HGNC:10437]	ENSMMUT00000007715	1291	1500	+
ENSMMUG00000017353	SRXN1	Sulfiredoxin-1; Uncharacterized protein [Source:UniProtKB/TrEMBL;Acc:F7H9B2]	ENSMMUT00000024401	291	410	+
ENSMMUG00000013639	BAT2L2	Uncharacterized protein [Source:UniProtKB/TrEMBL;Acc:F7GIJ3]	ENSMMUT00000019149	4541	4660	+
ENSMMUG00000004709	PSMF1	proteasome (prosome, macropain) inhibitor subunit 1 (PI31) [Source:HGNC Symbol;Acc:HGNC:9571]	ENSMMUT00000006655	2551	2710	+
ENSMMUG00000015994	NSFL1C	NSFL1 (p97) cofactor (p47) [Source:HGNC Symbol;Acc:HGNC:15912]	ENSMMUT00000022487	1131	1260	+
ENSMMUG00000007266	METTL13	Uncharacterized protein [Source:UniProtKB/TrEMBL;Acc:F7FCH5]	ENSMMUT00000010151	2011	2200	+
ENSMMUG00000017280	TBC1D10C	Uncharacterized protein [Source:UniProtKB/TrEMBL;Acc:F7CR35]	ENSMMUT00000024290	1210	1730	+
ENSMMUG00000022817	TMBIM1	Transmembrane BAX inhibitor motif-containing protein 1; Uncharacterized protein [Source:UniProtKB/TrEMBL;Acc:F6UPC8]	ENSMMUT00000032112	1831	2040	+
ENSMMUG00000017274	CLCF1	cardiotrophin-like cytokine factor 1 [Source:HGNC Symbol;Acc:HGNC:17412]	ENSMMUT00000024282	561	730	+
ENSMMUG00000004523	POLD4	DNA polymerase delta subunit 4; DNA polymerase delta subunit p12; Uncharacterized protein [Source:UniProtKB/TrEMBL;Acc:F6SCR4]	ENSMMUT00000006404	746	910	+
ENSMMUG00000006730	SIRPA	Uncharacterized protein [Source:UniProtKB/TrEMBL;Acc:F7HFE7]	ENSMMUT00000009419	861	1050	+
ENSMMUG00000004305	STK35	serine/threonine kinase 35 [Source:HGNC Symbol;Acc:HGNC:16254]	ENSMMUT00000006116	981	1200	+
ENSMMUG00000015928	ANKRD13D	ankyrin repeat domain 13 family, member D [Source:HGNC Symbol;Acc:HGNC:27880]	ENSMMUT00000044611	1841	1990	+
ENSMMUG00000010050	SNRPB	Small nuclear ribonucleoprotein-associated protein [Source:UniProtKB/TrEMBL;Acc:F6TEX8]	ENSMMUT00000014035	1001	1111	+
ENSMMUG00000007279	PIGC	Phosphatidylinositol N-acetylglucosaminyltransferase subunit C; Uncharacterized protein [Source:UniProtKB/TrEMBL;Acc:F7FCE6]	ENSMMUT00000010165	1261	1360	+
ENSMMUG00000007280	SUCO	SUN domain containing ossification factor [Source:HGNC Symbol;Acc:HGNC:1240]	ENSMMUT00000019300	3954	4238	+
ENSMMUG00000015268	CTDSP1	Carboxy-terminal domain RNA polymerase II polypeptide A small phosphatase 1 isoform 1; Uncharacterized protein [Source:UniProtKB/TrEMBL;Acc:F7DV44]	ENSMMUT00000021406	1071	1410	+
ENSMMUG00000008771	KDM2A	Lysine-specific demethylase 2A; Lysine-specific demethylase 2A isoform a; Uncharacterized protein [Source:UniProtKB/TrEMBL;Acc:F7DKL6]	ENSMMUT00000012253	3661	3950	+
ENSMMUG00000007285	FASLG	Macaca mulatta Fas ligand (TNF superfamily, member 6) (FASLG), mRNA. [Source:RefSeq mRNA;Acc:NM_001032838]	ENSMMUT00000010180	1121	1410	+
ENSMMUG00000013888	NOP56	Uncharacterized protein [Source:UniProtKB/TrEMBL;Acc:F6R553]	ENSMMUT00000019496	1481	1650	+
ENSMMUG00000021328	IDH3B	Uncharacterized protein [Source:UniProtKB/TrEMBL;Acc:F6URC2]	ENSMMUT00000030015	1411	1520	+
ENSMMUG00000005510	TNFSF4	Uncharacterized protein [Source:UniProtKB/TrEMBL;Acc:F7FL80]	ENSMMUT00000007751	806	1417	+
ENSMMUG00000006737	ZNF142	Uncharacterized protein [Source:UniProtKB/TrEMBL;Acc:F7HF94]	ENSMMUT00000009431	4911	5160	+
ENSMMUG00000006740	BCS1L	BC1 (ubiquinol-cytochrome c reductase) synthesis-like [Source:HGNC Symbol;Acc:HGNC:1020]	ENSMMUT00000044598	601	860	+
ENSMMUG00000004531	RCE1	CAAX prenyl protease 2 isoform 1; Uncharacterized protein [Source:UniProtKB/TrEMBL;Acc:F6SC53]	ENSMMUT00000006413	911	1432	+
ENSMMUG00000006743	RNF25	ring finger protein 25 [Source:HGNC Symbol;Acc:HGNC:14662]	ENSMMUT00000009438	821	1020	+
ENSMMUG00000022798	DARS2	aspartyl-tRNA synthetase 2, mitochondrial [Source:HGNC Symbol;Acc:HGNC:25538]	ENSMMUT00000032079	1775	1930	+
ENSMMUG00000005200	FAM113A	Uncharacterized protein [Source:UniProtKB/TrEMBL;Acc:F7CSK4]	ENSMMUT00000007324	1711	1950	+
ENSMMUG00000001565	RABGAP1L	RAB GTPase activating protein 1-like [Source:HGNC Symbol;Acc:HGNC:24663]	ENSMMUT00000044582	1461	1590	+
ENSMMUG00000007830	RBM14	RNA binding motif protein 14 [Source:HGNC Symbol;Acc:HGNC:14219]	ENSMMUT00000010964	431	700	+
ENSMMUG00000005513	CCS	Copper chaperone for superoxide dismutase; Superoxide dismutase copper chaperone; Uncharacterized protein [Source:UniProtKB/TrEMBL;Acc:F7FL64]	ENSMMUT00000007754	891	1050	+
ENSMMUG00000005204	VPS16	Uncharacterized protein [Source:UniProtKB/TrEMBL;Acc:F6QQW0]	ENSMMUT00000044573	2541	2679	+
ENSMMUG00000001571	CACYBP	Calcyclin-binding protein isoform 1; Uncharacterized protein [Source:UniProtKB/TrEMBL;Acc:F7FP94]	ENSMMUT00000002223	529	908	+
ENSMMUG00000005878	PTPRA	protein tyrosine phosphatase, receptor type, A [Source:HGNC Symbol;Acc:HGNC:9664]	ENSMMUT00000008238	3081	3257	+
ENSMMUG00000020727	ZDHHC24	Putative palmitoyltransferase ZDHHC24; Uncharacterized protein [Source:UniProtKB/TrEMBL;Acc:F7GVE4]	ENSMMUT00000029153	991	1264	+
ENSMMUG00000000546			ENSMMUT00000000794	1	220	+
ENSMMUG00000000791	CNPPD1	Protein CNPPD1; Uncharacterized protein [Source:UniProtKB/TrEMBL;Acc:F6RA57]	ENSMMUT00000001143	1031	1280	+
ENSMMUG00000000792	FAM134A	family with sequence similarity 134, member A [Source:HGNC Symbol;Acc:HGNC:28450]	ENSMMUT00000001148	1331	1630	+
ENSMMUG00000002072	RFWD2	E3 ubiquitin-protein ligase RFWD2 isoform a; Uncharacterized protein [Source:UniProtKB/TrEMBL;Acc:F6QR11]	ENSMMUT00000044569	2561	2735	+
ENSMMUG00000019616	ABCB6	ATP-binding cassette, sub-family B (MDR/TAP), member 6 [Source:HGNC Symbol;Acc:HGNC:47]	ENSMMUT00000027546	2781	2970	+
ENSMMUG00000019619	ATG9A	Uncharacterized protein [Source:UniProtKB/TrEMBL;Acc:F6QR66]	ENSMMUT00000027554	2861	3110	+
ENSMMUG00000010027	DDRGK1	DDRGK domain containing 1 [Source:HGNC Symbol;Acc:HGNC:16110]	ENSMMUT00000013994	381	680	+
ENSMMUG00000001403	YIF1A	Protein YIF1A; Uncharacterized protein [Source:UniProtKB/TrEMBL;Acc:F7CUN8]	ENSMMUT00000001989	981	1080	+
ENSMMUG00000031203	ITPA	Inosine triphosphate pyrophosphatase [Source:UniProtKB/TrEMBL;Acc:F6QR76]	ENSMMUT00000044561	872	1067	+
ENSMMUG00000014510	ANKZF1	ankyrin repeat and zinc finger domain containing 1 [Source:HGNC Symbol;Acc:HGNC:25527]	ENSMMUT00000020352	1891	2110	+
ENSMMUG00000019626	STK16	Uncharacterized protein [Source:UniProtKB/TrEMBL;Acc:F7B0W4]	ENSMMUT00000027568	1363	1480	+
ENSMMUG00000022283	ATRN	attractin [Source:HGNC Symbol;Acc:HGNC:885]	ENSMMUT00000031348	4081	4608	+
ENSMMUG00000019628	TUBA4A	Tubulin alpha-4A chain; Uncharacterized protein [Source:UniProtKB/TrEMBL;Acc:F6QRE8]	ENSMMUT00000044554	1221	1423	+
ENSMMUG00000000634	ZNF692	Uncharacterized protein [Source:UniProtKB/TrEMBL;Acc:F6QRI7]	ENSMMUT00000000912	1707	1913	+
ENSMMUG00000019115	EIF1AD	Eukaryotic translation initiation factor 1A domain-containing protein; Putative RNA-binding protein EIF1AD; Uncharacterized protein [Source:UniProtKB/TrEMBL;Acc:F6T7W0]	ENSMMUT00000026863	641	830	+
ENSMMUG00000000632	SH3BP5L	SH3 domain-binding protein 5-like; Uncharacterized protein [Source:UniProtKB/TrEMBL;Acc:F6Y0K6]	ENSMMUT00000000907	2018	2260	+
ENSMMUG00000019012	EFEMP2	Uncharacterized protein [Source:UniProtKB/TrEMBL;Acc:F6QSF0]	ENSMMUT00000044538	1820	2070	+
ENSMMUG00000022079	C20orf27	chromosome 20 open reading frame 27 [Source:HGNC Symbol;Acc:HGNC:15873]	ENSMMUT00000031062	1761	1880	+
ENSMMUG00000018922	CDC25B	cell division cycle 25B [Source:HGNC Symbol;Acc:HGNC:1726]	ENSMMUT00000026604	2601	2830	+
ENSMMUG00000019014	MUS81	MUS81 structure-specific endonuclease subunit [Source:HGNC Symbol;Acc:HGNC:29814]	ENSMMUT00000026719	2171	2333	+
ENSMMUG00000019956	PANK2	Uncharacterized protein [Source:UniProtKB/TrEMBL;Acc:F6QZB9]	ENSMMUT00000028051	1701	1910	+
ENSMMUG00000016408	AHCTF1	AT hook containing transcription factor 1 [Source:HGNC Symbol;Acc:HGNC:24618]	ENSMMUT00000023043	5991	6921	+
ENSMMUG00000019949	PRNP	Macaca mulatta prion protein (PRNP), mRNA. [Source:RefSeq mRNA;Acc:NM_001047152]	ENSMMUT00000028037	181	720	+
ENSMMUG00000012583			ENSMMUT00000017637	1	370	+
ENSMMUG00000019839	KAT5	Uncharacterized protein [Source:UniProtKB/TrEMBL;Acc:F6QZE4]	ENSMMUT00000027881	241	380	+
ENSMMUG00000007418	RELA	Uncharacterized protein [Source:UniProtKB/TrEMBL;Acc:F6QZH6]	ENSMMUT00000044528	1471	1619	+
ENSMMUG00000020005	SLC23A1	Sodium-dependent vitamin C transporter 2; Solute carrier family 23 member 2; Uncharacterized protein [Source:UniProtKB/TrEMBL;Acc:F6R000]	ENSMMUT00000044526	2881	3010	+
ENSMMUG00000007416	SIPA1	Uncharacterized protein [Source:UniProtKB/TrEMBL;Acc:F6SXF3]	ENSMMUT00000010366	361	620	+
ENSMMUG00000007406	PCNXL3	Uncharacterized protein [Source:UniProtKB/TrEMBL;Acc:F6T3E7]	ENSMMUT00000010354	561	1200	+
ENSMMUG00000013258	TMEM230	UPF0414 transmembrane protein C20orf30 isoform 1; Uncharacterized protein [Source:UniProtKB/TrEMBL;Acc:F6R010]	ENSMMUT00000018612	511	900	+
ENSMMUG00000007404	MAP3K11	Mitogen-activated protein kinase kinase kinase 11; Uncharacterized protein [Source:UniProtKB/TrEMBL;Acc:F6T3F7]	ENSMMUT00000010353	2841	3070	+
ENSMMUG00000013259	PCNA	Proliferating cell nuclear antigen [Source:UniProtKB/TrEMBL;Acc:F6ZD63]	ENSMMUT00000018615	1	180	+
ENSMMUG00000013242	CHPF	Chondroitin sulfate synthase 2 isoform 1; Uncharacterized protein [Source:UniProtKB/TrEMBL;Acc:F6ZK43]	ENSMMUT00000018592	791	900	+
ENSMMUG00000022208	SCCPDH	saccharopine dehydrogenase (putative) [Source:HGNC Symbol;Acc:HGNC:24275]	ENSMMUT00000031237	951	1100	+
ENSMMUG00000013261	CDS2	CDP-diacylglycerol synthase (phosphatidate cytidylyltransferase) 2 [Source:HGNC Symbol;Acc:HGNC:1801]	ENSMMUT00000018617	1208	1425	+
ENSMMUG00000011380	CNST	consortin, connexin sorting protein [Source:HGNC Symbol;Acc:HGNC:26486]	ENSMMUT00000044519	1431	1630	+
ENSMMUG00000014169	EHBP1L1	Uncharacterized protein [Source:UniProtKB/TrEMBL;Acc:F7ALS2]	ENSMMUT00000019884	3561	3690	+
ENSMMUG00000022915	TFB2M	Uncharacterized protein [Source:UniProtKB/TrEMBL;Acc:F6W6K7]	ENSMMUT00000032256	1191	1440	+
ENSMMUG00000001809	GPCPD1	glycerophosphocholine phosphodiesterase GDE1 homolog (S. cerevisiae) [Source:HGNC Symbol;Acc:HGNC:26957]	ENSMMUT00000002545	1511	1800	+
ENSMMUG00000031183	FAM89B	Uncharacterized protein [Source:UniProtKB/TrEMBL;Acc:F6R0S9]	ENSMMUT00000044516	811	1100	+
ENSMMUG00000002519	STK11IP	Uncharacterized protein [Source:UniProtKB/TrEMBL;Acc:F7HCE7]	ENSMMUT00000003584	3282	3576	+
ENSMMUG00000013728	TRMT6	Uncharacterized protein [Source:UniProtKB/TrEMBL;Acc:F6RNX4]	ENSMMUT00000019293	831	1020	+
ENSMMUG00000023477	SCYL1	SCY1-like 1 (S. cerevisiae) [Source:HGNC Symbol;Acc:HGNC:14372]	ENSMMUT00000033028	2221	2420	+
ENSMMUG00000023300	FRMD8	Uncharacterized protein [Source:UniProtKB/TrEMBL;Acc:F7FB33]	ENSMMUT00000032778	1261	1390	+
ENSMMUG00000023297	SLC25A45	Uncharacterized protein [Source:UniProtKB/TrEMBL;Acc:F6R1G1]	ENSMMUT00000032777	675	909	+
ENSMMUG00000031175	COX20	Putative uncharacterized protein FAM36A; Uncharacterized protein [Source:UniProtKB/TrEMBL;Acc:F6R113]	ENSMMUT00000044503	331	493	+
ENSMMUG00000022310	PPPDE1	Uncharacterized protein [Source:UniProtKB/TrEMBL;Acc:F6XDP6]	ENSMMUT00000031390	641	940	+
ENSMMUG00000031174			ENSMMUT00000044500	1891	2080	+
ENSMMUG00000022031	POLA2	DNA polymerase alpha subunit B [Source:UniProtKB/TrEMBL;Acc:F7HTD4]	ENSMMUT00000030995	2131	2340	+
ENSMMUG00000000016	ADSS	Adenylosuccinate synthetase isozyme 2 [Source:UniProtKB/TrEMBL;Acc:F7HTL0]	ENSMMUT00000000024	1411	1640	+
ENSMMUG00000005393	ACSL3	acyl-CoA synthetase long-chain family member 3 [Source:HGNC Symbol;Acc:HGNC:3570]	ENSMMUT00000007589	1921	2270	+
ENSMMUG00000013475	CAPN1	Uncharacterized protein [Source:UniProtKB/TrEMBL;Acc:F6ZLR4]	ENSMMUT00000018915	2701	2923	+
ENSMMUG00000021137	TMX4	Thioredoxin-related transmembrane protein 4; Uncharacterized protein [Source:UniProtKB/TrEMBL;Acc:F7HDA1]	ENSMMUT00000029730	891	1325	+
ENSMMUG00000018778	MRPL49	39S ribosomal protein L49, mitochondrial; Uncharacterized protein [Source:UniProtKB/TrEMBL;Acc:F6ZWE1]	ENSMMUT00000026397	521	746	+
ENSMMUG00000019914	CEP170	centrosomal protein 170kDa [Source:HGNC Symbol;Acc:HGNC:28920]	ENSMMUT00000044485	2781	2950	+
ENSMMUG00000018775	ZNHIT2	zinc finger, HIT-type containing 2 [Source:HGNC Symbol;Acc:HGNC:1177]	ENSMMUT00000026394	1081	1300	+
ENSMMUG00000018773	TM7SF2	transmembrane 7 superfamily member 2 [Source:HGNC Symbol;Acc:HGNC:11863]	ENSMMUT00000026393	1601	1800	+
ENSMMUG00000022259	CUL3	Cullin-3; Uncharacterized protein [Source:UniProtKB/TrEMBL;Acc:F6R900]	ENSMMUT00000044483	2371	2590	+
ENSMMUG00000031168	SAC3D1	SAC3 domain containing 1 [Source:HGNC Symbol;Acc:HGNC:30179]	ENSMMUT00000044479	1141	1480	+
ENSMMUG00000031166	MKKS	McKusick-Kaufman/Bardet-Biedl syndromes putative chaperonin; Uncharacterized protein [Source:UniProtKB/TrEMBL;Acc:F6SUK4]	ENSMMUT00000005510	2401	2580	+
ENSMMUG00000008761	EXO1	exonuclease 1 [Source:HGNC Symbol;Acc:HGNC:3511]	ENSMMUT00000044472	2001	2410	+
ENSMMUG00000000722	RHBDD1	rhomboid domain containing 1 [Source:HGNC Symbol;Acc:HGNC:23081]	ENSMMUT00000001039	241	390	+
ENSMMUG00000018116	JAG1	jagged 1 [Source:HGNC Symbol;Acc:HGNC:6188]	ENSMMUT00000025448	3317	3660	+
ENSMMUG00000018913	BTBD3	Uncharacterized protein [Source:UniProtKB/TrEMBL;Acc:F6ZZJ5]	ENSMMUT00000026589	1221	1680	+
ENSMMUG00000003973	ATG2A	autophagy related 2A [Source:HGNC Symbol;Acc:HGNC:29028]	ENSMMUT00000005632	5731	6269	+
ENSMMUG00000003972	EHD1	EH domain-containing protein 1; Testilin; Uncharacterized protein [Source:UniProtKB/TrEMBL;Acc:F6XYM2]	ENSMMUT00000005630	1941	2130	+
ENSMMUG00000005667	FH	fumarate hydratase [Source:HGNC Symbol;Acc:HGNC:3700]	ENSMMUT00000007968	1361	1557	+
ENSMMUG00000007545			ENSMMUT00000010553	1456	1620	+
ENSMMUG00000013247	AGFG1	Uncharacterized protein [Source:UniProtKB/TrEMBL;Acc:F6SVJ9]	ENSMMUT00000044444	1431	1700	+
ENSMMUG00000013786	DSTN	Uncharacterized protein [Source:UniProtKB/TrEMBL;Acc:F6TEG7]	ENSMMUT00000019359	311	480	+
ENSMMUG00000007610	RPS6KA4	Uncharacterized protein [Source:UniProtKB/TrEMBL;Acc:F6SDE0]	ENSMMUT00000010650	2312	2594	+
ENSMMUG00000011476	SNX5	Uncharacterized protein [Source:UniProtKB/TrEMBL;Acc:F6T231]	ENSMMUT00000044432	1121	1572	+
ENSMMUG00000015842	TRIP12	thyroid hormone receptor interactor 12 [Source:HGNC Symbol;Acc:HGNC:12306]	ENSMMUT00000022264	5941	6120	+
ENSMMUG00000011479	C10H20ORF72	Uncharacterized protein [Source:UniProtKB/TrEMBL;Acc:F7ADZ7]	ENSMMUT00000016070	1141	1330	+
ENSMMUG00000017803	ESRRA	Uncharacterized protein [Source:UniProtKB/TrEMBL;Acc:F6T237]	ENSMMUT00000012293	2151	2280	+
ENSMMUG00000012199	SP140	SP140 nuclear body protein [Source:HGNC Symbol;Acc:HGNC:17133]	ENSMMUT00000017083	841	1000	+
ENSMMUG00000023140	PET117	Cytochrome c oxidase assembly factor-like; Uncharacterized protein [Source:UniProtKB/TrEMBL;Acc:F7DFJ7]	ENSMMUT00000032553	1341	1600	+
ENSMMUG00000010073	MTR	5-methyltetrahydrofolate-homocysteine methyltransferase [Source:HGNC Symbol;Acc:HGNC:7468]	ENSMMUT00000014067	2661	2860	+
ENSMMUG00000012948	PLCB3	Uncharacterized protein [Source:UniProtKB/TrEMBL;Acc:F6RJC0]	ENSMMUT00000018158	3099	3440	+
ENSMMUG00000012878	SEC23B	Uncharacterized protein [Source:UniProtKB/TrEMBL;Acc:F6SFU7]	ENSMMUT00000018065	2271	2430	+
ENSMMUG00000012945	FKBP2	Peptidyl-prolyl cis-trans isomerase [Source:UniProtKB/TrEMBL;Acc:F6RJJ7]	ENSMMUT00000018154	481	630	+
ENSMMUG00000011769	PSMD1	proteasome (prosome, macropain) 26S subunit, non-ATPase, 1 [Source:HGNC Symbol;Acc:HGNC:9554]	ENSMMUT00000016500	2410	2740	+
ENSMMUG00000012944	VEGFB	Uncharacterized protein; Vascular endothelial growth factor B [Source:UniProtKB/TrEMBL;Acc:F6RJK6]	ENSMMUT00000018151	971	1110	+
ENSMMUG00000012941	NUDT22	Uncharacterized protein [Source:UniProtKB/TrEMBL;Acc:F6RJR0]	ENSMMUT00000018147	481	600	+
ENSMMUG00000012940	TRPT1	tRNA phosphotransferase 1 [Source:HGNC Symbol;Acc:HGNC:20316]	ENSMMUT00000018146	767	950	+
ENSMMUG00000015135	HEATR1	HEAT repeat containing 1 [Source:HGNC Symbol;Acc:HGNC:25517]	ENSMMUT00000021216	5441	5630	+
ENSMMUG00000019565	PDE6D	Retinal rod rhodopsin-sensitive cGMP 3',5'-cyclic phosphodiesterase subunit delta; Uncharacterized protein [Source:UniProtKB/TrEMBL;Acc:F7BMR1]	ENSMMUT00000027484	21	250	+
ENSMMUG00000022831	COPS7B	Uncharacterized protein [Source:UniProtKB/TrEMBL;Acc:F6T991]	ENSMMUT00000044406	1031	1230	+
ENSMMUG00000000478		Uncharacterized protein [Source:UniProtKB/TrEMBL;Acc:F6T9R8]	ENSMMUT00000000705	1671	1790	+
ENSMMUG00000014131	MARK2	MAP/microtubule affinity-regulating kinase 2 [Source:HGNC Symbol;Acc:HGNC:3332]	ENSMMUT00000044397	1961	2406	+
ENSMMUG00000022151	EIF4E2	Uncharacterized protein [Source:UniProtKB/TrEMBL;Acc:F6TAR5]	ENSMMUT00000031159	34	240	+
ENSMMUG00000015876	RTN3	Reticulon [Source:UniProtKB/TrEMBL;Acc:F6TAU8]	ENSMMUT00000044389	3331	3580	+
ENSMMUG00000012211	GIGYF2	GRB10 interacting GYF protein 2 [Source:HGNC Symbol;Acc:HGNC:11960]	ENSMMUT00000044386	4611	4820	+
ENSMMUG00000005776	ATL3	atlastin GTPase 3 [Source:HGNC Symbol;Acc:HGNC:24526]	ENSMMUT00000008108	1601	1700	+
ENSMMUG00000008427	B3GALNT2	beta-1,3-N-acetylgalactosaminyltransferase 2 [Source:HGNC Symbol;Acc:HGNC:28596]	ENSMMUT00000011784	831	960	+
ENSMMUG00000008426	TBCE	Tubulin-specific chaperone E; Uncharacterized protein [Source:UniProtKB/TrEMBL;Acc:F6VBW2]	ENSMMUT00000011780	1661	1840	+
ENSMMUG00000011405	XRN2	5'-3' exoribonuclease 2 [Source:HGNC Symbol;Acc:HGNC:12836]	ENSMMUT00000015973	1131	1350	+
ENSMMUG00000007141	ARID4B	Uncharacterized protein [Source:UniProtKB/TrEMBL;Acc:F7DMU1]	ENSMMUT00000009969	2301	2520	+
ENSMMUG00000031139		Peptidyl-prolyl cis-trans isomerase [Source:UniProtKB/TrEMBL;Acc:F6RNM6]	ENSMMUT00000006482	351	493	+
ENSMMUG00000022387	GZF1	GDNF-inducible zinc finger protein 1 [Source:HGNC Symbol;Acc:HGNC:15808]	ENSMMUT00000031486	1961	2340	+
ENSMMUG00000023358	ATG16L1	Uncharacterized protein [Source:UniProtKB/TrEMBL;Acc:F7E8C5]	ENSMMUT00000032865	611	850	+
ENSMMUG00000022388	NAPB	N-ethylmaleimide-sensitive factor attachment protein, beta [Source:HGNC Symbol;Acc:HGNC:15751]	ENSMMUT00000031490	9	580	+
ENSMMUG00000020354	SLC3A2	Uncharacterized protein [Source:UniProtKB/TrEMBL;Acc:F6RUW5]	ENSMMUT00000028625	364	600	+
ENSMMUG00000018779	WDR74	WD repeat domain 74 [Source:HGNC Symbol;Acc:HGNC:25529]	ENSMMUT00000026407	1191	1290	+
ENSMMUG00000020597	ACSS1	acyl-CoA synthetase short-chain family member 1 [Source:HGNC Symbol;Acc:HGNC:16091]	ENSMMUT00000028978	3471	3608	+
ENSMMUG00000005280	STX5	Syntaxin-5; Uncharacterized protein [Source:UniProtKB/TrEMBL;Acc:F7BHP2]	ENSMMUT00000007430	1651	1790	+
ENSMMUG00000021703	TARBP1	TAR (HIV-1) RNA binding protein 1 [Source:HGNC Symbol;Acc:HGNC:11568]	ENSMMUT00000030535	3921	4060	+
ENSMMUG00000011874	ENTPD6	ectonucleoside triphosphate diphosphohydrolase 6 (putative) [Source:HGNC Symbol;Acc:HGNC:3368]	ENSMMUT00000044373	2551	2690	+
ENSMMUG00000000188	NXF1	nuclear RNA export factor 1 [Source:HGNC Symbol;Acc:HGNC:8071]	ENSMMUT00000000280	1921	2129	+
ENSMMUG00000023094	TMEM223	transmembrane protein 223 [Source:HGNC Symbol;Acc:HGNC:28464]	ENSMMUT00000032490	464	748	+
ENSMMUG00000003682	TMEM179B	Transmembrane protein 179B; Uncharacterized protein [Source:UniProtKB/TrEMBL;Acc:F6SNV8]	ENSMMUT00000005210	661	850	+
ENSMMUG00000005646	DGKD	diacylglycerol kinase, delta 130kDa [Source:HGNC Symbol;Acc:HGNC:2851]	ENSMMUT00000007941	2181	2370	+
ENSMMUG00000014367	TTC9C	tetratricopeptide repeat domain 9C [Source:HGNC Symbol;Acc:HGNC:28432]	ENSMMUT00000020161	861	1010	+
ENSMMUG00000012614	NTPCR	Uncharacterized protein [Source:UniProtKB/TrEMBL;Acc:F6RV68]	ENSMMUT00000017686	561	750	+
ENSMMUG00000009201	ABHD12	Uncharacterized protein [Source:UniProtKB/TrEMBL;Acc:F6RVA3]	ENSMMUT00000044365	1301	1900	+
ENSMMUG00000005761	UBXN1	UBX domain-containing protein 1; Uncharacterized protein [Source:UniProtKB/TrEMBL;Acc:F6W1J6]	ENSMMUT00000008090	351	740	+
ENSMMUG00000005247	EGLN1	Uncharacterized protein [Source:UniProtKB/TrEMBL;Acc:F7BR52]	ENSMMUT00000007389	1441	1635	+
ENSMMUG00000013949		Uncharacterized protein [Source:UniProtKB/TrEMBL;Acc:F6SE34]	ENSMMUT00000019580	341	475	+
ENSMMUG00000013951	INTS5	Uncharacterized protein [Source:UniProtKB/TrEMBL;Acc:F6SE14]	ENSMMUT00000019582	2051	2270	+
ENSMMUG00000018117	GANAB	Neutral alpha-glucosidase AB isoform 2; Uncharacterized protein [Source:UniProtKB/TrEMBL;Acc:F6RVK6]	ENSMMUT00000044356	3691	3839	+
ENSMMUG00000005244	C1ORF124	Uncharacterized protein [Source:UniProtKB/TrEMBL;Acc:F7BR90]	ENSMMUT00000007383	1741	1920	+
ENSMMUG00000005801	GNPAT	Uncharacterized protein [Source:UniProtKB/TrEMBL;Acc:F6RVY3]	ENSMMUT00000008135	2073	2417	+
ENSMMUG00000005803	C1orf131	chromosome 1 open reading frame 131 [Source:HGNC Symbol;Acc:HGNC:25332]	ENSMMUT00000008136	741	860	+
ENSMMUG00000031126	B3GAT3	beta-1,3-glucuronyltransferase 3 (glucuronosyltransferase I) [Source:HGNC Symbol;Acc:HGNC:923]	ENSMMUT00000044350	881	980	+
ENSMMUG00000018112	EML3	echinoderm microtubule associated protein like 3 [Source:HGNC Symbol;Acc:HGNC:26666]	ENSMMUT00000025443	2652	2930	+
ENSMMUG00000006595	TUT1	Uncharacterized protein [Source:UniProtKB/TrEMBL;Acc:F7HMM6]	ENSMMUT00000009228	1661	1800	+
ENSMMUG00000008191	FAM89A	family with sequence similarity 89, member A [Source:HGNC Symbol;Acc:HGNC:25057]	ENSMMUT00000011446	551	700	+
ENSMMUG00000005892	ARV1	ARV1 homolog (S. cerevisiae) [Source:HGNC Symbol;Acc:HGNC:29561]	ENSMMUT00000044343	901	1210	+
ENSMMUG00000006598	EEF1G	eukaryotic translation elongation factor 1 gamma [Source:HGNC Symbol;Acc:HGNC:3213]	ENSMMUT00000009232	1311	1450	+
ENSMMUG00000021605	COPS8	Uncharacterized protein [Source:UniProtKB/TrEMBL;Acc:F7E470]	ENSMMUT00000030411	931	1160	+
ENSMMUG00000031124	CECR5	Uncharacterized protein [Source:UniProtKB/TrEMBL;Acc:F6S2S0]	ENSMMUT00000044340	851	970	+
ENSMMUG00000005888	TTC13	Uncharacterized protein [Source:UniProtKB/TrEMBL;Acc:F6TL01]	ENSMMUT00000008242	2051	2220	+
ENSMMUG00000013831	ASRGL1	Uncharacterized protein [Source:UniProtKB/TrEMBL;Acc:F6S3A3]	ENSMMUT00000019415	1251	1410	+
ENSMMUG00000015146	FTH1	Ferritin [Source:UniProtKB/TrEMBL;Acc:F6S3E9]	ENSMMUT00000044326	1	100	+
ENSMMUG00000021477	ATP6V1E1	ATPase, H+ transporting, lysosomal 31kDa, V1 subunit E1 [Source:HGNC Symbol;Acc:HGNC:857]	ENSMMUT00000044322	71	410	+
ENSMMUG00000018482	UBE2F	NEDD8-conjugating enzyme UBE2F isoform 1; Uncharacterized protein [Source:UniProtKB/TrEMBL;Acc:F6X242]	ENSMMUT00000025988	601	830	+
ENSMMUG00000005877	COG2	component of oligomeric golgi complex 2 [Source:HGNC Symbol;Acc:HGNC:6546]	ENSMMUT00000008227	2241	2532	+
ENSMMUG00000020801		Uncharacterized protein [Source:UniProtKB/TrEMBL;Acc:F7H9R5]	ENSMMUT00000029266	2851	2970	+
ENSMMUG00000020802			ENSMMUT00000029267	1981	2259	+
ENSMMUG00000018483	SCLY	selenocysteine lyase [Source:HGNC Symbol;Acc:HGNC:18161]	ENSMMUT00000044312	9	240	+
ENSMMUG00000014140	PEX26	Uncharacterized protein [Source:UniProtKB/TrEMBL;Acc:F6SAA0]	ENSMMUT00000044309	1931	2072	+
ENSMMUG00000002285	GALNT2	Polypeptide N-acetylgalactosaminyltransferase 2; Uncharacterized protein [Source:UniProtKB/TrEMBL;Acc:F7B3H7]	ENSMMUT00000003236	1691	2140	+
ENSMMUG00000009509	URB2	Uncharacterized protein [Source:UniProtKB/TrEMBL;Acc:F6YMV8]	ENSMMUT00000013269	3431	3620	+
ENSMMUG00000018908	ILKAP	Uncharacterized protein [Source:UniProtKB/TrEMBL;Acc:F6ZZW8]	ENSMMUT00000026584	881	1010	+
ENSMMUG00000000327	FADS2	Fatty acid desaturase 2; Uncharacterized protein [Source:UniProtKB/TrEMBL;Acc:F6YUF6]	ENSMMUT00000000475	1	120	+
ENSMMUG00000009508	TAF5L	TAF5-like RNA polymerase II p300/CBP-associated factor-associated factor 65 kDa subunit 5L isoform a; Uncharacterized protein [Source:UniProtKB/TrEMBL;Acc:F6YMW6]	ENSMMUT00000013268	1711	1820	+
ENSMMUG00000022094	ABCB10	ATP-binding cassette, sub-family B (MDR/TAP), member 10 [Source:HGNC Symbol;Acc:HGNC:41]	ENSMMUT00000031081	3371	3580	+
ENSMMUG00000003272		Uncharacterized protein [Source:UniProtKB/TrEMBL;Acc:F7FKN6]	ENSMMUT00000004628	1	136	+
ENSMMUG00000022091	NUP133	nucleoporin 133kDa [Source:HGNC Symbol;Acc:HGNC:18016]	ENSMMUT00000031079	2951	3488	+
ENSMMUG00000005431	SLC25A1	Tricarboxylate transport protein, mitochondrial; Uncharacterized protein [Source:UniProtKB/TrEMBL;Acc:F7GRH3]	ENSMMUT00000007641	1451	1610	+
ENSMMUG00000009511	ASB1	Ankyrin repeat and SOCS box protein 1; Uncharacterized protein [Source:UniProtKB/TrEMBL;Acc:F6YMV0]	ENSMMUT00000013271	1111	1496	+
ENSMMUG00000015281	SDHAF2	Succinate dehydrogenase assembly factor 2, mitochondrial; Uncharacterized protein [Source:UniProtKB/TrEMBL;Acc:F7DUG5]	ENSMMUT00000021423	621	798	+
ENSMMUG00000009650	HIRA	Uncharacterized protein [Source:UniProtKB/TrEMBL;Acc:F6YJS8]	ENSMMUT00000013477	3531	3899	+
ENSMMUG00000017720	RAB4A	Ras-related protein Rab-4A; Uncharacterized protein [Source:UniProtKB/TrEMBL;Acc:F7F8R4]	ENSMMUT00000024904	921	1061	+
ENSMMUG00000015280	CPSF7	cleavage and polyadenylation specific factor 7, 59kDa [Source:HGNC Symbol;Acc:HGNC:30098]	ENSMMUT00000021422	2761	3040	+
ENSMMUG00000014832	GPC1	Glypican-1; Uncharacterized protein [Source:UniProtKB/TrEMBL;Acc:F6VPW9]	ENSMMUT00000020810	2191	2390	+
ENSMMUG00000022372	CYB561A3	cytochrome b561 family, member A3 [Source:HGNC Symbol;Acc:HGNC:23014]	ENSMMUT00000031467	371	571	+
ENSMMUG00000002691	DDB1	Uncharacterized protein [Source:UniProtKB/TrEMBL;Acc:F6SHK7]	ENSMMUT00000003832	2091	2270	+
ENSMMUG00000031106	UFD1L	Ubiquitin fusion degradation protein 1 homolog isoform A; Uncharacterized protein [Source:UniProtKB/TrEMBL;Acc:F6SHL7]	ENSMMUT00000044289	971	1070	+
ENSMMUG00000015625	RNPEPL1	Uncharacterized protein [Source:UniProtKB/TrEMBL;Acc:F6RUA0]	ENSMMUT00000021918	2364	2791	+
ENSMMUG00000015628	CAPN10	calpain 10 [Source:HGNC Symbol;Acc:HGNC:1477]	ENSMMUT00000021934	2231	2430	+
ENSMMUG00000021904	CDC45	cell division cycle 45 [Source:HGNC Symbol;Acc:HGNC:1739]	ENSMMUT00000030818	451	650	+
ENSMMUG00000014533	TMEM132A	transmembrane protein 132A [Source:HGNC Symbol;Acc:HGNC:31092]	ENSMMUT00000020390	3261	3460	+
ENSMMUG00000014531	TMEM109	transmembrane protein 109 [Source:HGNC Symbol;Acc:HGNC:28771]	ENSMMUT00000020386	851	960	+
ENSMMUG00000014530	PRPF19	pre-mRNA processing factor 19 [Source:HGNC Symbol;Acc:HGNC:17896]	ENSMMUT00000020384	521	640	+
ENSMMUG00000017144	GNB1L	Uncharacterized protein [Source:UniProtKB/TrEMBL;Acc:F6Q9G9]	ENSMMUT00000024101	411	560	+
ENSMMUG00000001260	MS4A1	Uncharacterized protein [Source:UniProtKB/TrEMBL;Acc:F6Q9M3]	ENSMMUT00000001784	781	1010	+
ENSMMUG00000016209	PPP1R7	protein phosphatase 1, regulatory subunit 7 [Source:HGNC Symbol;Acc:HGNC:9295]	ENSMMUT00000022774	831	1000	+
ENSMMUG00000017152	COMT	Catechol O-methyltransferase isoform MB-COMT; Uncharacterized protein [Source:UniProtKB/TrEMBL;Acc:F6QFW9]	ENSMMUT00000044266	1841	1960	+
ENSMMUG00000004736	2015-09-02	Septin-2; Uncharacterized protein [Source:UniProtKB/TrEMBL;Acc:F6R3X6]	ENSMMUT00000044262	1221	1470	+
ENSMMUG00000022321	MRPL16	39S ribosomal protein L16, mitochondrial; Uncharacterized protein [Source:UniProtKB/TrEMBL;Acc:F6XD71]	ENSMMUT00000031402	821	1070	+
ENSMMUG00000020098	mml-mir-1306	mml-mir-1306 [Source:miRBase;Acc:MI0023626]	ENSMMUT00000028274	2821	3110	+
ENSMMUG00000017287	PATL1	protein associated with topoisomerase II homolog 1 (yeast) [Source:HGNC Symbol;Acc:HGNC:26721]	ENSMMUT00000024302	1511	1800	+
ENSMMUG00000020100	RANBP1	Ran-specific GTPase-activating protein; Uncharacterized protein [Source:UniProtKB/TrEMBL;Acc:F7GMJ1]	ENSMMUT00000028276	541	746	+
ENSMMUG00000001745	OSBP	Oxysterol-binding protein [Source:UniProtKB/TrEMBL;Acc:F6QG42]	ENSMMUT00000002466	2711	3060	+
ENSMMUG00000005662	THAP4	Uncharacterized protein [Source:UniProtKB/TrEMBL;Acc:F6QG23]	ENSMMUT00000007961	361	530	+
ENSMMUG00000008047	ATG4B	autophagy related 4B, cysteine peptidase [Source:HGNC Symbol;Acc:HGNC:20790]	ENSMMUT00000011258	201	310	+
ENSMMUG00000008152	KLHL22	Kelch-like protein 22; Uncharacterized protein [Source:UniProtKB/TrEMBL;Acc:F7HGC9]	ENSMMUT00000011385	1881	2100	+
ENSMMUG00000011714	ZFP91	Uncharacterized protein [Source:UniProtKB/TrEMBL;Acc:F7HC63]	ENSMMUT00000016411	1590	2010	+
ENSMMUG00000011713	LPXN	Leupaxin isoform 2; Uncharacterized protein [Source:UniProtKB/TrEMBL;Acc:F7HC66]	ENSMMUT00000016409	23	130	+
ENSMMUG00000020483	THAP7	Uncharacterized protein [Source:UniProtKB/TrEMBL;Acc:F6QGY7]	ENSMMUT00000044242	994	1280	+
ENSMMUG00000020482	LZTR1	leucine-zipper-like transcription regulator 1 [Source:HGNC Symbol;Acc:HGNC:6742]	ENSMMUT00000028828	2411	2530	+
ENSMMUG00000012366	CTNND1	Uncharacterized protein [Source:UniProtKB/TrEMBL;Acc:F6QHE6]	ENSMMUT00000044231	3601	4150	+
ENSMMUG00000022167	PI4KA	phosphatidylinositol 4-kinase, catalytic, alpha [Source:HGNC Symbol;Acc:HGNC:8983]	ENSMMUT00000031179	4551	4720	+
ENSMMUG00000018994	UBE2L3	Uncharacterized protein [Source:UniProtKB/TrEMBL;Acc:F6XWT0]	ENSMMUT00000026696	1411	1688	+
ENSMMUG00000018798	SDF2L1	Macaca mulatta stromal cell-derived factor 2-like 1 (SDF2L1), mRNA. [Source:RefSeq mRNA;Acc:NM_001145067]	ENSMMUT00000026432	622	830	+
ENSMMUG00000012524	MAPK1	Mitogen-activated protein kinase 1; Uncharacterized protein [Source:UniProtKB/TrEMBL;Acc:F7ECR3]	ENSMMUT00000017561	2601	2760	+
ENSMMUG00000014487	TOP3B	DNA topoisomerase [Source:UniProtKB/TrEMBL;Acc:F6QNQ6]	ENSMMUT00000020323	2931	3100	+
ENSMMUG00000002563	ZDHHC5	zinc finger, DHHC-type containing 5 [Source:HGNC Symbol;Acc:HGNC:18472]	ENSMMUT00000044223	3411	3726	+
ENSMMUG00000031087	CLP1	Polyribonucleotide 5'-hydroxyl-kinase Clp1; Polyribonucleotide 5'-hydroxyl-kinase Clp1 isoform 1; Uncharacterized protein [Source:UniProtKB/TrEMBL;Acc:F6QNV8]	ENSMMUT00000044219	1351	1600	+
ENSMMUG00000010601	SLC43A3	Uncharacterized protein [Source:UniProtKB/TrEMBL;Acc:F7BRN1]	ENSMMUT00000014835	1761	1860	+
ENSMMUG00000017810	SSRP1	Uncharacterized protein [Source:UniProtKB/TrEMBL;Acc:F6QY28]	ENSMMUT00000025029	1431	2200	+
ENSMMUG00000008516	SPECC1L	Cytospin-A; Cytospin-A isoform 1; Uncharacterized protein [Source:UniProtKB/TrEMBL;Acc:F6WRA1]	ENSMMUT00000011906	3831	4010	+
ENSMMUG00000017809	TNKS1BP1	Uncharacterized protein [Source:UniProtKB/TrEMBL;Acc:F6QY86]	ENSMMUT00000044189	3771	4060	+
ENSMMUG00000010869	NUP160	nucleoporin 160kDa [Source:HGNC Symbol;Acc:HGNC:18017]	ENSMMUT00000015204	1911	2090	+
ENSMMUG00000016937	FNBP4	formin binding protein 4 [Source:HGNC Symbol;Acc:HGNC:19752]	ENSMMUT00000023796	1021	1120	+
ENSMMUG00000004286	PTPMT1	NADH dehydrogenase [ubiquinone] iron-sulfur protein 3, mitochondrial; Uncharacterized protein [Source:UniProtKB/TrEMBL;Acc:F6ZLX4]	ENSMMUT00000006091	1671	1770	+
ENSMMUG00000004289	KBTBD4	Uncharacterized protein [Source:UniProtKB/TrEMBL;Acc:F6SSA4]	ENSMMUT00000006099	1761	2060	+
ENSMMUG00000011657	CELF1	Uncharacterized protein [Source:UniProtKB/TrEMBL;Acc:F6SSD3]	ENSMMUT00000044149	3451	3610	+
ENSMMUG00000015611	PSMC3	Uncharacterized protein [Source:UniProtKB/TrEMBL;Acc:F6SSZ5]	ENSMMUT00000021897	211	410	+
ENSMMUG00000023442	HPS4	Hermansky-Pudlak syndrome 4 [Source:HGNC Symbol;Acc:HGNC:15844]	ENSMMUT00000032980	1461	1640	+
ENSMMUG00000023443	SRRD	SRR1 domain containing [Source:HGNC Symbol;Acc:HGNC:33910]	ENSMMUT00000032986	671	1190	+
ENSMMUG00000023446	TFIP11	Macaca mulatta tuftelin interacting protein 11 (TFIP11), mRNA. [Source:RefSeq mRNA;Acc:NM_001080120]	ENSMMUT00000032991	2561	2960	+
ENSMMUG00000001058	TTC28	Uncharacterized protein [Source:UniProtKB/TrEMBL;Acc:F6QN66]	ENSMMUT00000001506	6291	6480	+
ENSMMUG00000015597	ACP2	acid phosphatase 2, lysosomal [Source:HGNC Symbol;Acc:HGNC:123]	ENSMMUT00000021876	1741	1906	+
ENSMMUG00000022964	DDB2	DNA damage-binding protein 2; Uncharacterized protein [Source:UniProtKB/TrEMBL;Acc:F6ST49]	ENSMMUT00000044136	1411	1760	+
ENSMMUG00000006355	C14H11ORF49	Uncharacterized protein [Source:UniProtKB/TrEMBL;Acc:F6SZL4]	ENSMMUT00000044125	1701	1900	+
ENSMMUG00000007214	CCDC117	coiled-coil domain containing 117 [Source:HGNC Symbol;Acc:HGNC:26599]	ENSMMUT00000010077	661	1140	+
ENSMMUG00000007215	XBP1	Uncharacterized protein [Source:UniProtKB/TrEMBL;Acc:F7EKN6]	ENSMMUT00000010079	1041	1170	+
ENSMMUG00000003631	CKAP5	cytoskeleton associated protein 5 [Source:HGNC Symbol;Acc:HGNC:28959]	ENSMMUT00000005146	3331	3500	+
ENSMMUG00000019673	ZNF408	zinc finger protein 408 [Source:HGNC Symbol;Acc:HGNC:20041]	ENSMMUT00000027636	2221	2430	+
ENSMMUG00000021373	RHBDD3	Rhomboid domain-containing protein 3; Uncharacterized protein [Source:UniProtKB/TrEMBL;Acc:F7FI16]	ENSMMUT00000030082	1621	1760	+
ENSMMUG00000019672	ATG13	Autophagy-related protein 13; Autophagy-related protein 13 isoform 1; Uncharacterized protein [Source:UniProtKB/TrEMBL;Acc:F6T0G8]	ENSMMUT00000044117	2801	3050	+
ENSMMUG00000011526	AMBRA1	autophagy/beclin-1 regulator 1 [Source:HGNC Symbol;Acc:HGNC:25990]	ENSMMUT00000016141	3401	3610	+
ENSMMUG00000021446	DGKZ	diacylglycerol kinase, zeta [Source:HGNC Symbol;Acc:HGNC:2857]	ENSMMUT00000030187	3691	3946	+
ENSMMUG00000021380	AP1B1	adaptor-related protein complex 1, beta 1 subunit [Source:HGNC Symbol;Acc:HGNC:554]	ENSMMUT00000030094	2511	2620	+
ENSMMUG00000002617	PHF21A	Uncharacterized protein [Source:UniProtKB/TrEMBL;Acc:F7H7D4]	ENSMMUT00000003724	2031	2230	+
ENSMMUG00000023552	THOC5	THO complex 5 [Source:HGNC Symbol;Acc:HGNC:19074]	ENSMMUT00000033129	531	710	+
ENSMMUG00000010311	NF2	Uncharacterized protein [Source:UniProtKB/TrEMBL;Acc:F6RHN3]	ENSMMUT00000044112	2051	2160	+
ENSMMUG00000008878	PEX16	Uncharacterized protein [Source:UniProtKB/TrEMBL;Acc:F7DTL5]	ENSMMUT00000012416	1201	1300	+
ENSMMUG00000022236	MTMR3	myotubularin related protein 3 [Source:HGNC Symbol;Acc:HGNC:7451]	ENSMMUT00000031278	2701	3170	+
ENSMMUG00000005553	TBC1D10A	Uncharacterized protein [Source:UniProtKB/TrEMBL;Acc:F6T840]	ENSMMUT00000044103	1131	1300	+
ENSMMUG00000013095	EXT2	exostosin glycosyltransferase 2 [Source:HGNC Symbol;Acc:HGNC:3513]	ENSMMUT00000018368	2201	2470	+
ENSMMUG00000000844	TTC17	tetratricopeptide repeat domain 17 [Source:HGNC Symbol;Acc:HGNC:25596]	ENSMMUT00000001214	2051	2240	+
ENSMMUG00000008827	API5	Apoptosis inhibitor 5 isoform b; Uncharacterized protein [Source:UniProtKB/TrEMBL;Acc:F7EXC8]	ENSMMUT00000012336	3181	3330	+
ENSMMUG00000013404	SEC14L2	Uncharacterized protein [Source:UniProtKB/TrEMBL;Acc:F6T8B4]	ENSMMUT00000018805	1724	1960	+
ENSMMUG00000018266	TRAF6	Macaca mulatta TNF receptor-associated factor 6 (LOC716907), mRNA. [Source:RefSeq mRNA;Acc:NM_001135796]	ENSMMUT00000044094	1161	1920	+
ENSMMUG00000018265	PRR5L	proline rich 5 like [Source:HGNC Symbol;Acc:HGNC:25878]	ENSMMUT00000044093	1341	1440	+
ENSMMUG00000017562	PES1	Uncharacterized protein [Source:UniProtKB/TrEMBL;Acc:F6WSE9]	ENSMMUT00000024705	1201	1690	+
ENSMMUG00000004332	TRIM44	Uncharacterized protein [Source:UniProtKB/TrEMBL;Acc:F6ZDC0]	ENSMMUT00000006155	241	450	+
ENSMMUG00000004327	CD44	Uncharacterized protein [Source:UniProtKB/TrEMBL;Acc:F6ZDW3]	ENSMMUT00000006144	2201	2323	+
ENSMMUG00000013406		Uncharacterized protein [Source:UniProtKB/TrEMBL;Acc:F6Z3R8]	ENSMMUT00000018802	841	1020	+
ENSMMUG00000002429	CAT	catalase [Source:HGNC Symbol;Acc:HGNC:1516]	ENSMMUT00000003454	1041	1210	+
ENSMMUG00000021647	ABTB2	ankyrin repeat and BTB (POZ) domain containing 2 [Source:HGNC Symbol;Acc:HGNC:23842]	ENSMMUT00000030464	511	690	+
ENSMMUG00000021646	NAT10	N-acetyltransferase 10 (GCN5-related) [Source:HGNC Symbol;Acc:HGNC:29830]	ENSMMUT00000030462	2911	3566	+
ENSMMUG00000019661	PIK3IP1	Uncharacterized protein [Source:UniProtKB/TrEMBL;Acc:F7CNM1]	ENSMMUT00000027620	801	1111	+
ENSMMUG00000013911	PATZ1	POZ (BTB) and AT hook containing zinc finger 1 [Source:HGNC Symbol;Acc:HGNC:13071]	ENSMMUT00000044080	1	587	+
ENSMMUG00000019099	DRG1	Developmentally-regulated GTP-binding protein 1; Uncharacterized protein [Source:UniProtKB/TrEMBL;Acc:F6TF39]	ENSMMUT00000026840	1321	1478	+
ENSMMUG00000031035	EIF4ENIF1	eukaryotic translation initiation factor 4E nuclear import factor 1 [Source:HGNC Symbol;Acc:HGNC:16687]	ENSMMUT00000044078	2451	2660	+
ENSMMUG00000006062	CD59	CD59 glycoprotein preproprotein; Membrane attack complex inhibition factor; Uncharacterized protein [Source:UniProtKB/TrEMBL;Acc:F6QCT1]	ENSMMUT00000044074	521	660	+
ENSMMUG00000019988	HIPK3	homeodomain interacting protein kinase 3 [Source:HGNC Symbol;Acc:HGNC:4915]	ENSMMUT00000012515	2356	2560	+
ENSMMUG00000021727		Uncharacterized protein [Source:UniProtKB/TrEMBL;Acc:F7E375]	ENSMMUT00000030572	571	770	+
ENSMMUG00000006720	C10H22ORF28	tRNA-splicing ligase RtcB homolog [Source:UniProtKB/TrEMBL;Acc:F7HFI7]	ENSMMUT00000009413	1521	1820	+
ENSMMUG00000006728	FBXO7	Uncharacterized protein [Source:UniProtKB/TrEMBL;Acc:F6QDL0]	ENSMMUT00000009418	1481	1680	+
[truncated: 2,886 more rows]
