# Supplementary material for: Evolution of transcript modification by N6-methyladenosine in primates
Source: HighWire-hosted journal article supplement (doi:10.1101/gr.212563.116), 2017-01-04
Supplement: Supplemental_Table_S9.xlsx [file Supplemental_Table_S9.xlsx]

## Sheet: sTable9.ConservedPeaks
Gid	Symbol	Description	Refseq_NM	Start	End	PeakName
7415	VCP	valosin containing protein	NM_007126	2451	2680	NM_007126-2451-2680-+
832	CAPZB	capping protein (actin filament) muscle Z-line, beta	NM_001206541	1251	1410	NM_001206541-1251-1410-+
6175	RPLP0	ribosomal protein, large, P0	NM_053275	611	820	NM_053275-611-820-+
5431	POLR2B	polymerase (RNA) II (DNA directed) polypeptide B, 140kDa	NM_000938	2601	2840	NM_000938-2601-2840-+
103	ADAR	adenosine deaminase, RNA-specific	NM_001193495	1881	2140	NM_001193495-1881-2140-+
6729	SRP54	signal recognition particle 54kDa	NM_003136	1441	1730	NM_003136-1441-1730-+
103	ADAR	adenosine deaminase, RNA-specific	NM_001193495	391	960	NM_001193495-391-960-+
7184	HSP90B1	heat shock protein 90kDa beta (Grp94), member 1	NM_003299	271	442	NM_003299-271-442-+
6651	SON	SON DNA binding protein	NM_138927	5111	5560	NM_138927-5111-5560-+
8678	BECN1	beclin 1, autophagy related	NM_003766	637	900	NM_003766-637-900-+
51116	MRPS2	mitochondrial ribosomal protein S2	NM_016034	1071	1260	NM_016034-1071-1260-+
84678	KDM2B	lysine (K)-specific demethylase 2B	NM_032590	1311	1770	NM_032590-1311-1770-+
10989	IMMT	inner membrane protein, mitochondrial	NM_006839	1221	1410	NM_006839-1221-1410-+
6429	SRSF4	serine/arginine-rich splicing factor 4	NM_005626	1141	1410	NM_005626-1141-1410-+
3191	HNRNPL	heterogeneous nuclear ribonucleoprotein L	NM_001533	921	1090	NM_001533-921-1090-+
5683	PSMA2	proteasome (prosome, macropain) subunit, alpha type, 2	NM_002787	541	779	NM_002787-541-779-+
3615	IMPDH2	IMP (inosine 5'-monophosphate) dehydrogenase 2	NM_000884	591	910	NM_000884-591-910-+
8560	DEGS1	delta(4)-desaturase, sphingolipid 1	NM_003676	961	1310	NM_003676-961-1310-+
3735	KARS	lysyl-tRNA synthetase	NM_001130089	251	450	NM_001130089-251-450-+
4218	RAB8A	RAB8A, member RAS oncogene family	NM_005370	1331	1480	NM_005370-1331-1480-+
29978	UBQLN2	ubiquilin 2	NM_013444	1561	1750	NM_013444-1561-1750-+
2771	GNAI2	guanine nucleotide binding protein (G protein), alpha inhibiting activity polypeptide 2	NM_001282619	1941	2270	NM_001282619-1941-2270-+
23207	PLEKHM2	pleckstrin homology domain containing, family M (with RUN domain) member 2	NM_015164	1645	2050	NM_015164-1645-2050-+
1939	EIF2D	eukaryotic translation initiation factor 2D	NM_006893	811	1040	NM_006893-811-1040-+
6772	STAT1	signal transducer and activator of transcription 1, 91kDa	NM_007315	696	1290	NM_007315-696-1290-+
4735	2015-09-02	septin 2	NM_001008491	1028	1280	NM_001008491-1028-1280-+
9921	RNF10	ring finger protein 10	NM_014868	661	860	NM_014868-661-860-+
3071	NCKAP1L	NCK-associated protein 1-like	NM_005337	1921	2230	NM_005337-1921-2230-+
4361	MRE11A	MRE11 meiotic recombination 11 homolog A (S. cerevisiae)	NM_005590	1461	2082	NM_005590-1461-2082-+
7874	USP7	ubiquitin specific peptidase 7 (herpes virus-associated)	NM_001286458	2901	3140	NM_001286458-2901-3140-+
7030	TFE3	transcription factor binding to IGHM enhancer 3	NM_006521	1721	1860	NM_006521-1721-1860-+
124801	LSM12	LSM12 homolog (S. cerevisiae)	NM_152344	691	1060	NM_152344-691-1060-+
752	FMNL1	formin-like 1	NM_005892	1371	1550	NM_005892-1371-1550-+
29927	SEC61A1	Sec61 alpha 1 subunit (S. cerevisiae)	NM_013336	1971	2300	NM_013336-1971-2300-+
5589	PRKCSH	protein kinase C substrate 80K-H	NM_001289103	1001	1210	NM_001289103-1001-1210-+
6772	STAT1	signal transducer and activator of transcription 1, 91kDa	NM_007315	2281	2480	NM_007315-2281-2480-+
56261	GPCPD1	glycerophosphocholine phosphodiesterase GDE1 homolog (S. cerevisiae)	NM_019593	1801	2090	NM_019593-1801-2090-+
4926	NUMA1	nuclear mitotic apparatus protein 1	NM_001286561	3831	3940	NM_001286561-3831-3940-+
3326	HSP90AB1	heat shock protein 90kDa alpha (cytosolic), class B member 1	NM_001271969	1801	1988	NM_001271969-1801-1988-+
10346	TRIM22	tripartite motif containing 22	NM_006074	581	1014	NM_006074-581-1014-+
7916	PRRC2A	proline-rich coiled-coil 2A	NM_004638_7	4131	4490	NM_004638_7-4131-4490-+
7453	WARS	tryptophanyl-tRNA synthetase	NM_004184	621	830	NM_004184-621-830-+
8202	NCOA3	nuclear receptor coactivator 3	NM_181659	4521	4800	NM_181659-4521-4800-+
30827	CXXC1	CXXC finger protein 1	NM_001101654	951	1140	NM_001101654-951-1140-+
9665	KIAA0430	KIAA0430	NM_001184998	5221	5480	NM_001184998-5221-5480-+
2193	FARSA	phenylalanyl-tRNA synthetase, alpha subunit	NM_004461	431	570	NM_004461-431-570-+
55249	YY1AP1	YY1 associated protein 1	NM_001198903	2581	2780	NM_001198903-2581-2780-+
10376	TUBA1B	tubulin, alpha 1b	NM_006082	871	1073	NM_006082-871-1073-+
23450	SF3B3	splicing factor 3b, subunit 3, 130kDa	NM_012426	1767	1990	NM_012426-1767-1990-+
54386	TERF2IP	telomeric repeat binding factor 2, interacting protein	NM_018975	715	1140	NM_018975-715-1140-+
3837	KPNB1	karyopherin (importin) beta 1	NM_002265	811	1020	NM_002265-811-1020-+
2923	PDIA3	protein disulfide isomerase family A, member 3	NM_005313	1541	1820	NM_005313-1541-1820-+
55625	ZDHHC7	zinc finger, DHHC-type containing 7	NM_001145548	1331	1730	NM_001145548-1331-1730-+
4170	MCL1	myeloid cell leukemia 1	NM_021960	1141	1670	NM_021960-1141-1670-+
83930	STARD3NL	STARD3 N-terminal like	NM_032016	331	588	NM_032016-331-588-+
29979	UBQLN1	ubiquilin 1	NM_013438	1241	1422	NM_013438-1241-1422-+
9703	KIAA0100	KIAA0100	NM_014680	6741	6990	NM_014680-6741-6990-+
23369	PUM2	pumilio RNA-binding family member 2	NM_015317	3291	3509	NM_015317-3291-3509-+
2288	FKBP4	FK506 binding protein 4, 59kDa	NM_002014	951	1130	NM_002014-951-1130-+
54461	FBXW5	F-box and WD repeat domain containing 5	NM_018998	1111	1290	NM_018998-1111-1290-+
1107	CHD3	chromodomain helicase DNA binding protein 3	NM_001005271	891	1106	NM_001005271-891-1106-+
10961	ERP29	endoplasmic reticulum protein 29	NM_006817	741	930	NM_006817-741-930-+
7267	TTC3	tetratricopeptide repeat domain 3	NM_003316	5861	6400	NM_003316-5861-6400-+
29117	BRD7	bromodomain containing 7	NM_001173984	851	1200	NM_001173984-851-1200-+
55738	ARFGAP1	ADP-ribosylation factor GTPase activating protein 1	NM_001281482	1521	1640	NM_001281482-1521-1640-+
116138	KLHDC3	kelch domain containing 3	NM_057161	1431	1640	NM_057161-1431-1640-+
55818	KDM3A	lysine (K)-specific demethylase 3A	NM_018433	2771	3020	NM_018433-2771-3020-+
7873	MANF	mesencephalic astrocyte-derived neurotrophic factor	NM_006010	481	700	NM_006010-481-700-+
1643	DDB2	damage-specific DNA binding protein 2, 48kDa	NM_000107	106	340	NM_000107-106-340-+
23126	POGZ	pogo transposable element with ZNF domain	NM_015100	3411	3700	NM_015100-3411-3700-+
6626	SNRPA	small nuclear ribonucleoprotein polypeptide A	NM_004596	551	660	NM_004596-551-660-+
10460	TACC3	transforming, acidic coiled-coil containing protein 3	NM_006342	1088	1420	NM_006342-1088-1420-+
1981	EIF4G1	eukaryotic translation initiation factor 4 gamma, 1	NM_182917	1541	1790	NM_182917-1541-1790-+
51523	CXXC5	CXXC finger protein 5	NM_016463	621	770	NM_016463-621-770-+
8073	PTP4A2	protein tyrosine phosphatase type IVA, member 2	NM_080391	1461	1673	NM_080391-1461-1673-+
8202	NCOA3	nuclear receptor coactivator 3	NM_181659	1821	2220	NM_181659-1821-2220-+
397	ARHGDIB	Rho GDP dissociation inhibitor (GDI) beta	NM_001175	37	240	NM_001175-37-240-+
286336	FAM78A	family with sequence similarity 78, member A	NM_033387	1151	1310	NM_033387-1151-1310-+
55832	CAND1	cullin-associated and neddylation-dissociated 1	NM_018448	2091	2830	NM_018448-2091-2830-+
8672	EIF4G3	eukaryotic translation initiation factor 4 gamma, 3	NM_001198801	1671	2120	NM_001198801-1671-2120-+
1655	DDX5	DEAD (Asp-Glu-Ala-Asp) box helicase 5	NM_004396	1681	1920	NM_004396-1681-1920-+
65125	WNK1	WNK lysine deficient protein kinase 1	NM_001184985	1211	1500	NM_001184985-1211-1500-+
27044	SND1	staphylococcal nuclease and tudor domain containing 1	NM_014390	511	764	NM_014390-511-764-+
1314	COPA	coatomer protein complex, subunit alpha	NM_001098398	2901	3120	NM_001098398-2901-3120-+
8615	USO1	USO1 vesicle transport factor	NM_001290049	2761	3220	NM_001290049-2761-3220-+
50809	HP1BP3	heterochromatin protein 1, binding protein 3	NM_016287	331	560	NM_016287-331-560-+
7311	UBA52	ubiquitin A-52 residue ribosomal protein fusion product 1	NM_001033930	481	590	NM_001033930-481-590-+
2058	EPRS	glutamyl-prolyl-tRNA synthetase	NM_004446	2551	2800	NM_004446-2551-2800-+
11176	BAZ2A	bromodomain adjacent to zinc finger domain, 2A	NM_001300905	3331	3485	NM_001300905-3331-3485-+
55720	TSR1	TSR1, 20S rRNA accumulation, homolog (S. cerevisiae)	NM_018128	1985	2430	NM_018128-1985-2430-+
23392	KIAA0368	KIAA0368	NM_001080398	2731	2930	NM_001080398-2731-2930-+
29028	ATAD2	ATPase family, AAA domain containing 2	NM_014109	3611	4010	NM_014109-3611-4010-+
4800	NFYA	nuclear transcription factor Y, alpha	NM_002505	1391	1780	NM_002505-1391-1780-+
203068	TUBB	tubulin, beta class I	NM_001293212_4	951	1090	NM_001293212_4-951-1090-+
7155	TOP2B	topoisomerase (DNA) II beta 180kDa	NM_001068	3261	3487	NM_001068-3261-3487-+
10075	HUWE1	HECT, UBA and WWE domain containing 1, E3 ubiquitin protein ligase	NM_031407	8411	8610	NM_031407-8411-8610-+
51283	BFAR	bifunctional apoptosis regulator	NM_016561	311	540	NM_016561-311-540-+
55082	ARGLU1	arginine and glutamate rich 1	NM_018011	841	1125	NM_018011-841-1125-+
7922	SLC39A7	solute carrier family 39 (zinc transporter), member 7	NM_006979	641	830	NM_006979-641-830-+
8522	GAS7	growth arrest-specific 7	NM_201433	1431	1680	NM_201433-1431-1680-+
8522	GAS7	growth arrest-specific 7	NM_201433	761	960	NM_201433-761-960-+
64744	SMAP2	small ArfGAP2	NM_022733	771	990	NM_022733-771-990-+
7916	PRRC2A	proline-rich coiled-coil 2A	NM_004638_7	2811	2910	NM_004638_7-2811-2910-+
22984	PDCD11	programmed cell death 11	NM_014976	5561	5900	NM_014976-5561-5900-+
23385	NCSTN	nicastrin	NM_001290184	2371	2650	NM_001290184-2371-2650-+
1874	E2F4	E2F transcription factor 4, p107/p130-binding	NM_001950	1241	1430	NM_001950-1241-1430-+
7874	USP7	ubiquitin specific peptidase 7 (herpes virus-associated)	NM_001286458	1811	2160	NM_001286458-1811-2160-+
9868	TOMM70A	translocase of outer mitochondrial membrane 70 homolog A (S. cerevisiae)	NM_014820	1231	1500	NM_014820-1231-1500-+
23381	SMG5	SMG5 nonsense mediated mRNA decay factor	NM_015327	1459	1795	NM_015327-1459-1795-+
6774	STAT3	signal transducer and activator of transcription 3 (acute-phase response factor)	NM_139276	621	840	NM_139276-621-840-+
4522	MTHFD1	methylenetetrahydrofolate dehydrogenase (NADP+ dependent) 1, methenyltetrahydrofolate cyclohydrolase, formyltetrahydrofolate synthetase	NM_005956	1821	2100	NM_005956-1821-2100-+
5770	PTPN1	protein tyrosine phosphatase, non-receptor type 1	NM_002827	1161	1390	NM_002827-1161-1390-+
113829	SLC35A4	solute carrier family 35, member A4	NM_080670	171	690	NM_080670-171-690-+
7494	XBP1	X-box binding protein 1	NM_005080	1101	1220	NM_005080-1101-1220-+
283237	TTC9C	tetratricopeptide repeat domain 9C	NM_173810	841	970	NM_173810-841-970-+
51061	TXNDC11	thioredoxin domain containing 11	NM_015914	2381	2600	NM_015914-2381-2600-+
26001	RNF167	ring finger protein 167	NM_015528	1211	1360	NM_015528-1211-1360-+
22794	CASC3	cancer susceptibility candidate 3	NM_007359	1111	1320	NM_007359-1111-1320-+
4171	MCM2	minichromosome maintenance complex component 2	NM_004526	281	630	NM_004526-281-630-+
23451	SF3B1	splicing factor 3b, subunit 1, 155kDa	NM_012433	431	750	NM_012433-431-750-+
171023	ASXL1	additional sex combs like transcriptional regulator 1	NM_015338	2471	2860	NM_015338-2471-2860-+
9133	CCNB2	cyclin B2	NM_004701	251	490	NM_004701-251-490-+
6786	STIM1	stromal interaction molecule 1	NM_001277961	1301	1650	NM_001277961-1301-1650-+
9689	BZW1	basic leucine zipper and W2 domains 1	NM_001207067	3010	3151	NM_001207067-3010-3151-+
54540	FAM193B	family with sequence similarity 193, member B	NM_001190946	1441	1880	NM_001190946-1441-1880-+
2733	GLE1	GLE1 RNA export mediator	NM_001003722	481	838	NM_001003722-481-838-+
1937	EEF1G	eukaryotic translation elongation factor 1 gamma	NM_001404	751	1035	NM_001404-751-1035-+
2997	GYS1	glycogen synthase 1 (muscle)	NM_002103	88	694	NM_002103-88-694-+
55209	SETD5	SET domain containing 5	NM_001292043	2021	2350	NM_001292043-2021-2350-+
476	ATP1A1	ATPase, Na+/K+ transporting, alpha 1 polypeptide	NM_001160233	391	500	NM_001160233-391-500-+
201595	STT3B	STT3B, subunit of the oligosaccharyltransferase complex (catalytic)	NM_178862	2641	3020	NM_178862-2641-3020-+
4795	NFKBIL1	nuclear factor of kappa light polypeptide gene enhancer in B-cells inhibitor-like 1	NM_005007_2	851	1050	NM_005007_2-851-1050-+
84549	MAK16	MAK16 homolog (S. cerevisiae)	NM_032509	641	986	NM_032509-641-986-+
1778	DYNC1H1	dynein, cytoplasmic 1, heavy chain 1	NM_001376	11441	11630	NM_001376-11441-11630-+
9877	ZC3H11A	zinc finger CCCH-type containing 11A	NM_014827	1691	2030	NM_014827-1691-2030-+
8450	CUL4B	cullin 4B	NM_003588	2701	3528	NM_003588-2701-3528-+
29088	MRPL15	mitochondrial ribosomal protein L15	NM_014175	651	950	NM_014175-651-950-+
226	ALDOA	aldolase A, fructose-bisphosphate	NM_000034	2271	2384	NM_000034-2271-2384-+
5528	PPP2R5D	protein phosphatase 2, regulatory subunit B', delta	NM_001270476	1911	2157	NM_001270476-1911-2157-+
1639	DCTN1	dynactin 1	NM_004082	991	1200	NM_004082-991-1200-+
79602	ADIPOR2	adiponectin receptor 2	NM_024551	111	410	NM_024551-111-410-+
26001	RNF167	ring finger protein 167	NM_015528	1461	1700	NM_015528-1461-1700-+
1666	DECR1	2,4-dienoyl CoA reductase 1, mitochondrial	NM_001359	1021	1202	NM_001359-1021-1202-+
10989	IMMT	inner membrane protein, mitochondrial	NM_006839	1701	1830	NM_006839-1701-1830-+
54915	YTHDF1	YTH N(6)-methyladenosine RNA binding protein 1	NM_017798	1051	1170	NM_017798-1051-1170-+
203068	TUBB	tubulin, beta class I	NM_001293212_4	1501	1660	NM_001293212_4-1501-1660-+
56910	STARD7	StAR-related lipid transfer (START) domain containing 7	NM_020151	1297	1770	NM_020151-1297-1770-+
25976	TIPARP	TCDD-inducible poly(ADP-ribose) polymerase	NM_001184717	511	1460	NM_001184717-511-1460-+
5019	OXCT1	3-oxoacid CoA transferase 1	NM_000436	2881	3090	NM_000436-2881-3090-+
10514	MYBBP1A	MYB binding protein (P160) 1a	NM_014520	3521	3930	NM_014520-3521-3930-+
22826	DNAJC8	DnaJ (Hsp40) homolog, subfamily C, member 8	NM_014280	441	740	NM_014280-441-740-+
7128	TNFAIP3	tumor necrosis factor, alpha-induced protein 3	NM_001270508	2881	3490	NM_001270508-2881-3490-+
23126	POGZ	pogo transposable element with ZNF domain	NM_015100	3871	4563	NM_015100-3871-4563-+
740	MRPL49	mitochondrial ribosomal protein L49	NM_004927	621	867	NM_004927-621-867-+
6780	STAU1	staufen double-stranded RNA binding protein 1	NM_017453	2101	2419	NM_017453-2101-2419-+
2983	GUCY1B3	guanylate cyclase 1, soluble, beta 3	NM_001291953	661	930	NM_001291953-661-930-+
7266	DNAJC7	DnaJ (Hsp40) homolog, subfamily C, member 7	NM_003315	1021	1240	NM_003315-1021-1240-+
473	RERE	arginine-glutamic acid dipeptide (RE) repeats	NM_012102	2661	3297	NM_012102-2661-3297-+
10236	HNRNPR	heterogeneous nuclear ribonucleoprotein R	NM_001102398	1991	2170	NM_001102398-1991-2170-+
8802	SUCLG1	succinate-CoA ligase, alpha subunit	NM_003849	1111	1295	NM_003849-1111-1295-+
55082	ARGLU1	arginine and glutamate rich 1	NM_018011	511	830	NM_018011-511-830-+
7874	USP7	ubiquitin specific peptidase 7 (herpes virus-associated)	NM_001286458	3291	3740	NM_001286458-3291-3740-+
3717	JAK2	Janus kinase 2	NM_004972	3111	3260	NM_004972-3111-3260-+
54432	YIPF1	Yip1 domain family, member 1	NM_018982	1581	1836	NM_018982-1581-1836-+
84896	ATAD1	ATPase family, AAA domain containing 1	NM_032810	481	590	NM_032810-481-590-+
51094	ADIPOR1	adiponectin receptor 1	NM_001290557	421	690	NM_001290557-421-690-+
10487	CAP1	CAP, adenylate cyclase-associated protein 1 (yeast)	NM_006367	1141	1360	NM_006367-1141-1360-+
5591	PRKDC	protein kinase, DNA-activated, catalytic polypeptide	NM_006904	9551	9930	NM_006904-9551-9930-+
54539	NDUFB11	NADH dehydrogenase (ubiquinone) 1 beta subcomplex, 11, 17.3kDa	NM_019056	1011	1110	NM_019056-1011-1110-+
2975	GTF3C1	general transcription factor IIIC, polypeptide 1, alpha 220kDa	NM_001520	3601	3790	NM_001520-3601-3790-+
5034	P4HB	prolyl 4-hydroxylase, beta polypeptide	NM_000918	1611	1820	NM_000918-1611-1820-+
29927	SEC61A1	Sec61 alpha 1 subunit (S. cerevisiae)	NM_013336	1591	1950	NM_013336-1591-1950-+
11180	WDR6	WD repeat domain 6	NM_018031	391	611	NM_018031-391-611-+
79869	CPSF7	cleavage and polyadenylation specific factor 7, 59kDa	NM_024811	1531	1800	NM_024811-1531-1800-+
5768	QSOX1	quiescin Q6 sulfhydryl oxidase 1	NM_002826	1561	2080	NM_002826-1561-2080-+
2030	SLC29A1	solute carrier family 29 (equilibrative nucleoside transporter), member 1	NM_001078177	1831	2140	NM_001078177-1831-2140-+
11198	SUPT16H	suppressor of Ty 16 homolog (S. cerevisiae)	NM_007192	591	840	NM_007192-591-840-+
9657	IQCB1	IQ motif containing B1	NM_001023570	1291	1530	NM_001023570-1291-1530-+
7094	TLN1	talin 1	NM_006289	1491	1640	NM_006289-1491-1640-+
23231	SEL1L3	sel-1 suppressor of lin-12-like 3 (C. elegans)	NM_015187	2391	2610	NM_015187-2391-2610-+
1665	DHX15	DEAH (Asp-Glu-Ala-His) box helicase 15	NM_001358	2431	2660	NM_001358-2431-2660-+
11177	BAZ1A	bromodomain adjacent to zinc finger domain, 1A	NM_013448	4251	4360	NM_013448-4251-4360-+
8563	THOC5	THO complex 5	NM_001002878	301	730	NM_001002878-301-730-+
9777	TM9SF4	transmembrane 9 superfamily protein member 4	NM_014742	2801	3112	NM_014742-2801-3112-+
9516	LITAF	lipopolysaccharide-induced TNF factor	NM_004862	821	1090	NM_004862-821-1090-+
5908	RAP1B	RAP1B, member of RAS oncogene family	NM_015646	901	1160	NM_015646-901-1160-+
10054	UBA2	ubiquitin-like modifier activating enzyme 2	NM_005499	1672	2228	NM_005499-1672-2228-+
124583	CANT1	calcium activated nucleotidase 1	NM_138793	901	1000	NM_138793-901-1000-+
65123	INTS3	integrator complex subunit 3	NM_023015_2	3481	3810	NM_023015_2-3481-3810-+
10670	RRAGA	Ras-related GTP binding A	NM_006570	351	710	NM_006570-351-710-+
963	CD53	CD53 molecule	NM_001040033	811	1380	NM_001040033-811-1380-+
1635	DCTD	dCMP deaminase	NM_001012732	811	1330	NM_001012732-811-1330-+
10528	NOP56	NOP56 ribonucleoprotein	NM_006392	1411	2010	NM_006392-1411-2010-+
5589	PRKCSH	protein kinase C substrate 80K-H	NM_001289103	1501	1620	NM_001289103-1501-1620-+
1937	EEF1G	eukaryotic translation elongation factor 1 gamma	NM_001404	1421	1530	NM_001404-1421-1530-+
1933	EEF1B2	eukaryotic translation elongation factor 1 beta 2	NM_001959	621	785	NM_001959-621-785-+
55342	STRBP	spermatid perinuclear RNA binding protein	NM_018387	538	965	NM_018387-538-965-+
64844	2015-03-07	membrane-associated ring finger (C3HC4) 7, E3 ubiquitin protein ligase	NM_001282805	791	1030	NM_001282805-791-1030-+
3308	HSPA4	heat shock 70kDa protein 4	NM_002154	1801	2277	NM_002154-1801-2277-+
83637	ZMIZ2	zinc finger, MIZ-type containing 2	NM_031449	1211	1360	NM_031449-1211-1360-+
8890	EIF2B4	eukaryotic translation initiation factor 2B, subunit 4 delta, 67kDa	NM_001034116	151	370	NM_001034116-151-370-+
171023	ASXL1	additional sex combs like transcriptional regulator 1	NM_015338	3251	3400	NM_015338-3251-3400-+
29789	OLA1	Obg-like ATPase 1	NM_013341	595	774	NM_013341-595-774-+
11180	WDR6	WD repeat domain 6	NM_018031	2351	2540	NM_018031-2351-2540-+
396	ARHGDIA	Rho GDP dissociation inhibitor (GDI) alpha	NM_001185077	901	1120	NM_001185077-901-1120-+
25963	TMEM87A	transmembrane protein 87A	NM_015497	1576	1840	NM_015497-1576-1840-+
6938	TCF12	transcription factor 12	NM_207037	1961	2180	NM_207037-1961-2180-+
55139	ANKZF1	ankyrin repeat and zinc finger domain containing 1	NM_018089	1261	1635	NM_018089-1261-1635-+
161424	NOP9	NOP9 nucleolar protein	NM_174913	1891	2120	NM_174913-1891-2120-+
9785	DHX38	DEAH (Asp-Glu-Ala-His) box polypeptide 38	NM_014003	831	1050	NM_014003-831-1050-+
701	BUB1B	BUB1 mitotic checkpoint serine/threonine kinase B	NM_001211	1341	1704	NM_001211-1341-1704-+
6601	SMARCC2	SWI/SNF related, matrix associated, actin dependent regulator of chromatin, subfamily c, member 2	NM_003075	861	1270	NM_003075-861-1270-+
3838	KPNA2	karyopherin alpha 2 (RAG cohort 1, importin alpha 1)	NM_002266	24	420	NM_002266-24-420-+
7942	TFEB	transcription factor EB	NM_007162	1841	2110	NM_007162-1841-2110-+
10856	RUVBL2	RuvB-like AAA ATPase 2	NM_006666	333	590	NM_006666-333-590-+
8615	USO1	USO1 vesicle transport factor	NM_001290049	2211	2630	NM_001290049-2211-2630-+
2617	GARS	glycyl-tRNA synthetase	NM_002047	561	750	NM_002047-561-750-+
6734	SRPR	signal recognition particle receptor (docking protein)	NM_003139	551	994	NM_003139-551-994-+
2969	GTF2I	general transcription factor IIi	NM_032999	3261	3483	NM_032999-3261-3483-+
22993	HMGXB3	HMG box domain containing 3	NM_014983	1635	1850	NM_014983-1635-1850-+
8673	VAMP8	vesicle-associated membrane protein 8	NM_003761	671	770	NM_003761-671-770-+
22794	CASC3	cancer susceptibility candidate 3	NM_007359	1471	1650	NM_007359-1471-1650-+
55139	ANKZF1	ankyrin repeat and zinc finger domain containing 1	NM_018089	1951	2157	NM_018089-1951-2157-+
57003	CCDC47	coiled-coil domain containing 47	NM_020198	468	700	NM_020198-468-700-+
23244	PDS5A	PDS5 cohesin associated factor A	NM_001100399	2611	2860	NM_001100399-2611-2860-+
4926	NUMA1	nuclear mitotic apparatus protein 1	NM_001286561	4771	4880	NM_001286561-4771-4880-+
3718	JAK3	Janus kinase 3	NM_000215	1601	1790	NM_000215-1601-1790-+
11325	DDX42	DEAD (Asp-Glu-Ala-Asp) box helicase 42	NM_007372	2201	3181	NM_007372-2201-3181-+
57003	CCDC47	coiled-coil domain containing 47	NM_020198	1533	1863	NM_020198-1533-1863-+
51366	UBR5	ubiquitin protein ligase E3 component n-recognin 5	NM_015902	2177	2470	NM_015902-2177-2470-+
30827	CXXC1	CXXC finger protein 1	NM_001101654	1681	1854	NM_001101654-1681-1854-+
329	BIRC2	baculoviral IAP repeat containing 2	NM_001256163	1661	2050	NM_001256163-1661-2050-+
9044	BTAF1	BTAF1 RNA polymerase II, B-TFIID transcription factor-associated, 170kDa	NM_003972	2841	3080	NM_003972-2841-3080-+
55813	UTP6	UTP6, small subunit (SSU) processome component, homolog (yeast)	NM_018428	911	1130	NM_018428-911-1130-+
5591	PRKDC	protein kinase, DNA-activated, catalytic polypeptide	NM_006904	7891	8519	NM_006904-7891-8519-+
6240	RRM1	ribonucleotide reductase M1	NM_001033	2504	2842	NM_001033-2504-2842-+
51292	GMPR2	guanosine monophosphate reductase 2	NM_001283021	1961	2170	NM_001283021-1961-2170-+
55958	KLHL9	kelch-like family member 9	NM_018847	1671	1990	NM_018847-1671-1990-+
2091	FBL	fibrillarin	NM_001436	261	430	NM_001436-261-430-+
58485	TRAPPC1	trafficking protein particle complex 1	NM_021210	701	800	NM_021210-701-800-+
29916	SNX11	sorting nexin 11	NM_152244	2281	2398	NM_152244-2281-2398-+
142	PARP1	poly (ADP-ribose) polymerase 1	NM_001618	421	965	NM_001618-421-965-+
22894	DIS3	DIS3 exosome endoribonuclease and 3'-5' exoribonuclease	NM_014953	681	1000	NM_014953-681-1000-+
7094	TLN1	talin 1	NM_006289	7791	7950	NM_006289-7791-7950-+
94005	PIGS	phosphatidylinositol glycan anchor biosynthesis, class S	NM_033198	1901	2290	NM_033198-1901-2290-+
4792	NFKBIA	nuclear factor of kappa light polypeptide gene enhancer in B-cells inhibitor, alpha	NM_020529	961	1272	NM_020529-961-1272-+
3032	HADHB	hydroxyacyl-CoA dehydrogenase/3-ketoacyl-CoA thiolase/enoyl-CoA hydratase (trifunctional protein), beta subunit	NM_001281513	221	363	NM_001281513-221-363-+
26999	CYFIP2	cytoplasmic FMR1 interacting protein 2	NM_014376	2821	3070	NM_014376-2821-3070-+
2342	FNTB	farnesyltransferase, CAAX box, beta	NM_002028	1551	1950	NM_002028-1551-1950-+
26058	GIGYF2	GRB10 interacting GYF protein 2	NM_015575	1281	1480	NM_015575-1281-1480-+
7551	ZNF3	zinc finger protein 3	NM_001278284	771	1160	NM_001278284-771-1160-+
9618	TRAF4	TNF receptor-associated factor 4	NM_004295	1281	1667	NM_004295-1281-1667-+
9877	ZC3H11A	zinc finger CCCH-type containing 11A	NM_014827	2931	3161	NM_014827-2931-3161-+
55588	MED29	mediator complex subunit 29	NM_017592	571	793	NM_017592-571-793-+
26118	WSB1	WD repeat and SOCS box containing 1	NM_015626	514	780	NM_015626-514-780-+
5788	PTPRC	protein tyrosine phosphatase, receptor type, C	NM_002838	3031	3260	NM_002838-3031-3260-+
473	RERE	arginine-glutamic acid dipeptide (RE) repeats	NM_012102	4511	4730	NM_012102-4511-4730-+
27183	VPS4A	vacuolar protein sorting 4 homolog A (S. cerevisiae)	NM_013245	1401	1532	NM_013245-1401-1532-+
2806	GOT2	glutamic-oxaloacetic transaminase 2, mitochondrial	NM_002080	1402	1786	NM_002080-1402-1786-+
8078	USP5	ubiquitin specific peptidase 5 (isopeptidase T)	NM_001098536	2661	2790	NM_001098536-2661-2790-+
10615	SPAG5	sperm associated antigen 5	NM_006461	451	720	NM_006461-451-720-+
55153	SDAD1	SDA1 domain containing 1	NM_001288984	881	1050	NM_001288984-881-1050-+
10957	PNRC1	proline-rich nuclear receptor coactivator 1	NM_006813	710	1241	NM_006813-710-1241-+
6609	SMPD1	sphingomyelin phosphodiesterase 1, acid lysosomal	NM_000543	861	1070	NM_000543-861-1070-+
56945	MRPS22	mitochondrial ribosomal protein S22	NM_020191	291	460	NM_020191-291-460-+
9958	USP15	ubiquitin specific peptidase 15	NM_001252078	381	530	NM_001252078-381-530-+
57176	VARS2	valyl-tRNA synthetase 2, mitochondrial	NM_001167734_5	781	920	NM_001167734_5-781-920-+
26985	AP3M1	adaptor-related protein complex 3, mu 1 subunit	NM_207012	1521	1784	NM_207012-1521-1784-+
10075	HUWE1	HECT, UBA and WWE domain containing 1, E3 ubiquitin protein ligase	NM_031407	5411	5740	NM_031407-5411-5740-+
2733	GLE1	GLE1 RNA export mediator	NM_001003722	1044	1287	NM_001003722-1044-1287-+
4302	MLLT6	myeloid/lymphoid or mixed-lineage leukemia (trithorax homolog, Drosophila); translocated to, 6	NM_005937	3291	3750	NM_005937-3291-3750-+
3309	HSPA5	heat shock 70kDa protein 5 (glucose-regulated protein, 78kDa)	NM_005347	1708	2510	NM_005347-1708-2510-+
64225	ATL2	atlastin GTPase 2	NM_022374	1381	1665	NM_022374-1381-1665-+
10212	DDX39A	DEAD (Asp-Glu-Ala-Asp) box polypeptide 39A	NM_005804	39	390	NM_005804-39-390-+
10523	CHERP	calcium homeostasis endoplasmic reticulum protein	NM_006387	2691	2970	NM_006387-2691-2970-+
22992	KDM2A	lysine (K)-specific demethylase 2A	NM_012308	4271	4480	NM_012308-4271-4480-+
90379	DCAF15	DDB1 and CUL4 associated factor 15	NM_138353	871	970	NM_138353-871-970-+
8533	COPS3	COP9 signalosome subunit 3	NM_003653	1391	1495	NM_003653-1391-1495-+
7818	DAP3	death associated protein 3	NM_001199849	791	990	NM_001199849-791-990-+
11336	EXOC3	exocyst complex component 3	NM_007277	761	1020	NM_007277-761-1020-+
54870	QRICH1	glutamine-rich 1	NM_017730	991	1230	NM_017730-991-1230-+
6780	STAU1	staufen double-stranded RNA binding protein 1	NM_017453	2420	2708	NM_017453-2420-2708-+
3054	HCFC1	host cell factor C1	NM_005334	3971	4520	NM_005334-3971-4520-+
7156	TOP3A	topoisomerase (DNA) III alpha	NM_004618	2851	3330	NM_004618-2851-3330-+
10507	SEMA4D	sema domain, immunoglobulin domain (Ig), transmembrane domain (TM) and short cytoplasmic domain, (semaphorin) 4D	NM_006378	2911	3200	NM_006378-2911-3200-+
1371	CPOX	coproporphyrinogen oxidase	NM_000097	297	813	NM_000097-297-813-+
8533	COPS3	COP9 signalosome subunit 3	NM_003653	1181	1360	NM_003653-1181-1360-+
25896	INTS7	integrator complex subunit 7	NM_015434	2751	3166	NM_015434-2751-3166-+
4140	MARK3	MAP/microtubule affinity-regulating kinase 3	NM_001128918	2580	2946	NM_001128918-2580-2946-+
10061	ABCF2	ATP-binding cassette, sub-family F (GCN20), member 2	NM_007189	301	450	NM_007189-301-450-+
5261	PHKG2	phosphorylase kinase, gamma 2 (testis)	NM_000294	1221	1697	NM_000294-1221-1697-+
51382	ATP6V1D	ATPase, H+ transporting, lysosomal 34kDa, V1 subunit D	NM_015994	351	510	NM_015994-351-510-+
10730	YME1L1	YME1-like 1 ATPase	NM_139312	2341	2590	NM_139312-2341-2590-+
22883	CLSTN1	calsyntenin 1	NM_001009566	3449	3668	NM_001009566-3449-3668-+
10808	HSPH1	heat shock 105kDa/110kDa protein 1	NM_006644	2091	2250	NM_006644-2091-2250-+
6001	RGS10	regulator of G-protein signaling 10	NM_001005339	571	792	NM_001005339-571-792-+
994	CDC25B	cell division cycle 25B	NM_021873	3431	3660	NM_021873-3431-3660-+
11180	WDR6	WD repeat domain 6	NM_018031	1061	1200	NM_018031-1061-1200-+
25940	FAM98A	family with sequence similarity 98, member A	NM_015475	931	1600	NM_015475-931-1600-+
6597	SMARCA4	SWI/SNF related, matrix associated, actin dependent regulator of chromatin, subfamily a, member 4	NM_001128844	2111	2470	NM_001128844-2111-2470-+
393	ARHGAP4	Rho GTPase activating protein 4	NM_001164741	531	730	NM_001164741-531-730-+
55827	DCAF6	DDB1 and CUL4 associated factor 6	NM_001198956	1229	1510	NM_001198956-1229-1510-+
29803	REPIN1	replication initiator 1	NM_013400	1561	1740	NM_013400-1561-1740-+
7756	ZNF207	zinc finger protein 207	NM_001098507	321	480	NM_001098507-321-480-+
372	ARCN1	archain 1	NM_001655	581	820	NM_001655-581-820-+
55250	ELP2	elongator acetyltransferase complex subunit 2	NM_001242875	2501	2767	NM_001242875-2501-2767-+
10678	B3GNT2	UDP-GlcNAc:betaGal beta-1,3-N-acetylglucosaminyltransferase 2	NM_006577	1161	1480	NM_006577-1161-1480-+
7037	TFRC	transferrin receptor	NM_003234	491	727	NM_003234-491-727-+
8834	TMEM11	transmembrane protein 11	NM_003876	821	1120	NM_003876-821-1120-+
8467	SMARCA5	SWI/SNF related, matrix associated, actin dependent regulator of chromatin, subfamily a, member 5	NM_003601	2961	3298	NM_003601-2961-3298-+
54440	SASH3	SAM and SH3 domain containing 3	NM_018990	2531	2688	NM_018990-2531-2688-+
6643	SNX2	sorting nexin 2	NM_001278199	1481	1640	NM_001278199-1481-1640-+
171023	ASXL1	additional sex combs like transcriptional regulator 1	NM_015338	4401	4690	NM_015338-4401-4690-+
8289	ARID1A	AT rich interactive domain 1A (SWI-like)	NM_006015	6321	7320	NM_006015-6321-7320-+
5708	PSMD2	proteasome (prosome, macropain) 26S subunit, non-ATPase, 2	NM_002808	1991	2219	NM_002808-1991-2219-+
5355	PLP2	proteolipid protein 2 (colonic epithelium-enriched)	NM_002668	611	780	NM_002668-611-780-+
4205	MEF2A	myocyte enhancer factor 2A	NM_001171894	2411	2670	NM_001171894-2411-2670-+
50488	MINK1	misshapen-like kinase 1	NM_153827	1151	1300	NM_153827-1151-1300-+
80774	LIMD2	LIM domain containing 2	NM_030576	1241	1340	NM_030576-1241-1340-+
9772	KIAA0195	KIAA0195	NM_014738	1831	1970	NM_014738-1831-1970-+
10376	TUBA1B	tubulin, alpha 1b	NM_006082	1408	1710	NM_006082-1408-1710-+
79009	DDX50	DEAD (Asp-Glu-Ala-Asp) box polypeptide 50	NM_024045	131	510	NM_024045-131-510-+
8522	GAS7	growth arrest-specific 7	NM_201433	1111	1360	NM_201433-1111-1360-+
10847	SRCAP	Snf2-related CREBBP activator protein	NM_006662	9161	9710	NM_006662-9161-9710-+
22993	HMGXB3	HMG box domain containing 3	NM_014983	4141	4750	NM_014983-4141-4750-+
142	PARP1	poly (ADP-ribose) polymerase 1	NM_001618	1391	1540	NM_001618-1391-1540-+
64427	TTC31	tetratricopeptide repeat domain 31	NM_022492	521	734	NM_022492-521-734-+
23511	NUP188	nucleoporin 188kDa	NM_015354	3741	3990	NM_015354-3741-3990-+
57231	SNX14	sorting nexin 14	NM_153816	1817	2060	NM_153816-1817-2060-+
401505	TOMM5	translocase of outer mitochondrial membrane 5 homolog (yeast)	NM_001134484	411	612	NM_001134484-411-612-+
440193	CCDC88C	coiled-coil domain containing 88C	NM_001080414	2511	2790	NM_001080414-2511-2790-+
7014	TERF2	telomeric repeat binding factor 2	NM_005652	1032	1740	NM_005652-1032-1740-+
100287932	TIMM23	translocase of inner mitochondrial membrane 23 homolog (yeast)	NM_006327	711	960	NM_006327-711-960-+
6780	STAU1	staufen double-stranded RNA binding protein 1	NM_017453	1111	1310	NM_017453-1111-1310-+
1660	DHX9	DEAH (Asp-Glu-Ala-His) box helicase 9	NM_001357	921	1070	NM_001357-921-1070-+
23193	GANAB	glucosidase, alpha; neutral AB	NM_198335	3171	3630	NM_198335-3171-3630-+
51573	GDE1	glycerophosphodiester phosphodiesterase 1	NM_016641	801	1270	NM_016641-801-1270-+
1200	TPP1	tripeptidyl peptidase I	NM_000391	1841	1970	NM_000391-1841-1970-+
6829	SUPT5H	suppressor of Ty 5 homolog (S. cerevisiae)	NM_003169	2861	3070	NM_003169-2861-3070-+
27183	VPS4A	vacuolar protein sorting 4 homolog A (S. cerevisiae)	NM_013245	301	530	NM_013245-301-530-+
7128	TNFAIP3	tumor necrosis factor, alpha-induced protein 3	NM_001270508	1861	2290	NM_001270508-1861-2290-+
5686	PSMA5	proteasome (prosome, macropain) subunit, alpha type, 5	NM_002790	731	900	NM_002790-731-900-+
3108	HLA-DMA	major histocompatibility complex, class II, DM alpha	NM_006120	541	710	NM_006120-541-710-+
7515	XRCC1	X-ray repair complementing defective repair in Chinese hamster cells 1	NM_006297	1398	1750	NM_006297-1398-1750-+
1786	DNMT1	DNA (cytosine-5-)-methyltransferase 1	NM_001130823	2211	2481	NM_001130823-2211-2481-+
51780	KDM3B	lysine (K)-specific demethylase 3B	NM_016604	5621	5770	NM_016604-5621-5770-+
6945	MLX	MLX, MAX dimerization protein	NM_170607	1111	1301	NM_170607-1111-1301-+
23019	CNOT1	CCR4-NOT transcription complex, subunit 1	NM_016284	4861	5040	NM_016284-4861-5040-+
55958	KLHL9	kelch-like family member 9	NM_018847	911	1430	NM_018847-911-1430-+
9682	KDM4A	lysine (K)-specific demethylase 4A	NM_014663	1181	1430	NM_014663-1181-1430-+
7184	HSP90B1	heat shock protein 90kDa beta (Grp94), member 1	NM_003299	991	1234	NM_003299-991-1234-+
23140	ZZEF1	zinc finger, ZZ-type with EF-hand domain 1	NM_015113	9361	9814	NM_015113-9361-9814-+
10421	CD2BP2	CD2 (cytoplasmic tail) binding protein 2	NM_001243646	691	890	NM_001243646-691-890-+
26284	ERAL1	Era-like 12S mitochondrial rRNA chaperone 1	NM_005702	1261	1480	NM_005702-1261-1480-+
6293	VPS52	vacuolar protein sorting 52 homolog (S. cerevisiae)	NM_001289174_3	2781	3010	NM_001289174_3-2781-3010-+
8764	TNFRSF14	tumor necrosis factor receptor superfamily, member 14	NM_003820	1111	1360	NM_003820-1111-1360-+
9459	ARHGEF6	Rac/Cdc42 guanine nucleotide exchange factor (GEF) 6	NM_004840	2301	2775	NM_004840-2301-2775-+
51154	MRTO4	mRNA turnover 4 homolog (S. cerevisiae)	NM_016183	881	1190	NM_016183-881-1190-+
54904	WHSC1L1	Wolf-Hirschhorn syndrome candidate 1-like 1	NM_023034	1529	1989	NM_023034-1529-1989-+
26091	HERC4	HECT and RLD domain containing E3 ubiquitin protein ligase 4	NM_022079	271	565	NM_022079-271-565-+
908	CCT6A	chaperonin containing TCP1, subunit 6A (zeta 1)	NM_001762	871	1060	NM_001762-871-1060-+
8079	MLF2	myeloid leukemia factor 2	NM_005439	1261	1377	NM_005439-1261-1377-+
10432	RBM14	RNA binding motif protein 14	NM_006328	481	790	NM_006328-481-790-+
51463	GPR89B	G protein-coupled receptor 89B	NM_016334	1671	1894	NM_016334-1671-1894-+
8242	KDM5C	lysine (K)-specific demethylase 5C	NM_004187	1121	1270	NM_004187-1121-1270-+
1778	DYNC1H1	dynein, cytoplasmic 1, heavy chain 1	NM_001376	10329	10530	NM_001376-10329-10530-+
23077	MYCBP2	MYC binding protein 2, E3 ubiquitin protein ligase	NM_015057	9809	10120	NM_015057-9809-10120-+
10540	DCTN2	dynactin 2 (p50)	NM_001261412	381	670	NM_001261412-381-670-+
23135	KDM6B	lysine (K)-specific demethylase 6B	NM_001080424	2071	2450	NM_001080424-2071-2450-+
51107	APH1A	APH1A gamma secretase subunit	NM_016022	1421	1610	NM_016022-1421-1610-+
8893	EIF2B5	eukaryotic translation initiation factor 2B, subunit 5 epsilon, 82kDa	NM_003907	2481	2730	NM_003907-2481-2730-+
10554	AGPAT1	1-acylglycerol-3-phosphate O-acyltransferase 1	NM_006411	127	303	NM_006411-127-303-+
4814	NINJ1	ninjurin 1	NM_004148	741	1055	NM_004148-741-1055-+
9632	SEC24C	SEC24 family member C	NM_004922	221	410	NM_004922-221-410-+
989	2015-09-07	septin 7	NM_001788	1152	1530	NM_001788-1152-1530-+
51291	GMIP	GEM interacting protein	NM_016573	2441	2730	NM_016573-2441-2730-+
9044	BTAF1	BTAF1 RNA polymerase II, B-TFIID transcription factor-associated, 170kDa	NM_003972	663	843	NM_003972-663-843-+
4074	M6PR	mannose-6-phosphate receptor (cation dependent)	NM_002355	281	570	NM_002355-281-570-+
23451	SF3B1	splicing factor 3b, subunit 1, 155kDa	NM_012433	3011	3180	NM_012433-3011-3180-+
57510	XPO5	exportin 5	NM_020750	3671	3890	NM_020750-3671-3890-+
2633	GBP1	guanylate binding protein 1, interferon-inducible	NM_002053	1701	2073	NM_002053-1701-2073-+
81887	LAS1L	LAS1-like (S. cerevisiae)	NM_031206	651	913	NM_031206-651-913-+
2314	FLII	flightless I homolog (Drosophila)	NM_002018	1561	1680	NM_002018-1561-1680-+
868	CBLB	Cbl proto-oncogene B, E3 ubiquitin protein ligase	NM_170662	3131	3551	NM_170662-3131-3551-+
10730	YME1L1	YME1-like 1 ATPase	NM_139312	1891	2090	NM_139312-1891-2090-+
5187	PER1	period circadian clock 1	NM_002616	3841	4332	NM_002616-3841-4332-+
55737	VPS35	vacuolar protein sorting 35 homolog (S. cerevisiae)	NM_018206	2131	2539	NM_018206-2131-2539-+
55667	DENND4C	DENN/MADD domain containing 4C	NM_017925	3261	4120	NM_017925-3261-4120-+
9868	TOMM70A	translocase of outer mitochondrial membrane 70 homolog A (S. cerevisiae)	NM_014820	2201	2621	NM_014820-2201-2621-+
23243	ANKRD28	ankyrin repeat domain 28	NM_001195098	2081	2352	NM_001195098-2081-2352-+
7259	TSPYL1	TSPY-like 1	NM_003309	861	1010	NM_003309-861-1010-+
5579	PRKCB	protein kinase C, beta	NM_002738	751	850	NM_002738-751-850-+
9898	UBAP2L	ubiquitin associated protein 2-like	NM_001287816	461	620	NM_001287816-461-620-+
9777	TM9SF4	transmembrane 9 superfamily protein member 4	NM_014742	3411	3863	NM_014742-3411-3863-+
3636	INPPL1	inositol polyphosphate phosphatase-like 1	NM_001567	3091	3260	NM_001567-3091-3260-+
4615	MYD88	myeloid differentiation primary response 88	NM_001172567	1211	1510	NM_001172567-1211-1510-+
22984	PDCD11	programmed cell death 11	NM_014976	2934	3315	NM_014976-2934-3315-+
5788	PTPRC	protein tyrosine phosphatase, receptor type, C	NM_002838	3841	4200	NM_002838-3841-4200-+
10525	HYOU1	hypoxia up-regulated 1	NM_006389	3021	3280	NM_006389-3021-3280-+
163	AP2B1	adaptor-related protein complex 2, beta 1 subunit	NM_001030006	60	400	NM_001030006-60-400-+
2597	GAPDH	glyceraldehyde-3-phosphate dehydrogenase	NM_001289745	1391	1490	NM_001289745-1391-1490-+
5993	RFX5	regulatory factor X, 5 (influences HLA class II expression)	NM_000449	1421	1880	NM_000449-1421-1880-+
23028	KDM1A	lysine (K)-specific demethylase 1A	NM_001009999	1441	1774	NM_001009999-1441-1774-+
23216	TBC1D1	TBC1 (tre-2/USP6, BUB2, cdc16) domain family, member 1	NM_015173	3721	4088	NM_015173-3721-4088-+
7514	XPO1	exportin 1	NM_003400	2201	2350	NM_003400-2201-2350-+
5096	PCCB	propionyl CoA carboxylase, beta polypeptide	NM_001178014	466	670	NM_001178014-466-670-+
9146	HGS	hepatocyte growth factor-regulated tyrosine kinase substrate	NM_004712	811	1060	NM_004712-811-1060-+
9525	VPS4B	vacuolar protein sorting 4 homolog B (S. cerevisiae)	NM_004869	411	710	NM_004869-411-710-+
6164	RPL34	ribosomal protein L34	NM_033625	391	527	NM_033625-391-527-+
85464	SSH2	slingshot protein phosphatase 2	NM_001282129	1801	2450	NM_001282129-1801-2450-+
30968	STOML2	stomatin (EPB72)-like 2	NM_013442	691	840	NM_013442-691-840-+
23367	LARP1	La ribonucleoprotein domain family, member 1	NM_015315	331	610	NM_015315-331-610-+
5606	MAP2K3	mitogen-activated protein kinase kinase 3	NM_145109	1501	1680	NM_145109-1501-1680-+
23344	ESYT1	extended synaptotagmin-like protein 1	NM_001184796	1241	1440	NM_001184796-1241-1440-+
55209	SETD5	SET domain containing 5	NM_001292043	4531	5320	NM_001292043-4531-5320-+
10526	IPO8	importin 8	NM_006390	3291	3552	NM_006390-3291-3552-+
8665	EIF3F	eukaryotic translation initiation factor 3, subunit F	NM_003754	1081	1242	NM_003754-1081-1242-+
3030	HADHA	hydroxyacyl-CoA dehydrogenase/3-ketoacyl-CoA thiolase/enoyl-CoA hydratase (trifunctional protein), alpha subunit	NM_000182	491	680	NM_000182-491-680-+
7415	VCP	valosin containing protein	NM_007126	2711	3090	NM_007126-2711-3090-+
7284	TUFM	Tu translation elongation factor, mitochondrial	NM_003321	1571	1697	NM_003321-1571-1697-+
10915	TCERG1	transcription elongation regulator 1	NM_006706	2551	2760	NM_006706-2551-2760-+
51061	TXNDC11	thioredoxin domain containing 11	NM_015914	1321	1620	NM_015914-1321-1620-+
10113	PREB	prolactin regulatory element binding	NM_013388	1731	1970	NM_013388-1731-1970-+
29855	UBN1	ubinuclein 1	NM_001079514	1301	1430	NM_001079514-1301-1430-+
23019	CNOT1	CCR4-NOT transcription complex, subunit 1	NM_016284	4251	4480	NM_016284-4251-4480-+
10299	2015-03-06	membrane-associated ring finger (C3HC4) 6, E3 ubiquitin protein ligase	NM_005885	882	1101	NM_005885-882-1101-+
10490	VTI1B	vesicle transport through interaction with t-SNAREs 1B	NM_006370	1151	1290	NM_006370-1151-1290-+
27044	SND1	staphylococcal nuclease and tudor domain containing 1	NM_014390	54	295	NM_014390-54-295-+
81704	DOCK8	dedicator of cytokinesis 8	NM_203447	4161	4340	NM_203447-4161-4340-+
114823	LENG8	leukocyte receptor cluster (LRC) member 8	NM_052925	2601	2809	NM_052925-2601-2809-+
6878	TAF6	TAF6 RNA polymerase II, TATA box binding protein (TBP)-associated factor, 80kDa	NM_005641	951	1220	NM_005641-951-1220-+
10489	LRRC41	leucine rich repeat containing 41	NM_006369	2501	2670	NM_006369-2501-2670-+
7024	TFCP2	transcription factor CP2	NM_005653	369	617	NM_005653-369-617-+
81572	PDRG1	p53 and DNA-damage regulated 1	NM_030815	681	840	NM_030815-681-840-+
9159	PCSK7	proprotein convertase subtilisin/kexin type 7	NM_004716	3391	3500	NM_004716-3391-3500-+
55626	AMBRA1	autophagy/beclin-1 regulator 1	NM_001267782	1991	2167	NM_001267782-1991-2167-+
23036	ZNF292	zinc finger protein 292	NM_015021	1351	1580	NM_015021-1351-1580-+
26999	CYFIP2	cytoplasmic FMR1 interacting protein 2	NM_014376	3811	4219	NM_014376-3811-4219-+
59286	UBL5	ubiquitin-like 5	NM_024292	411	510	NM_024292-411-510-+
23603	CORO1C	coronin, actin binding protein, 1C	NM_001276471	1441	1852	NM_001276471-1441-1852-+
23384	SPECC1L	sperm antigen with calponin homology and coiled-coil domains 1-like	NM_015330	2061	2377	NM_015330-2061-2377-+
26003	GORASP2	golgi reassembly stacking protein 2, 55kDa	NM_015530	2101	2220	NM_015530-2101-2220-+
64834	ELOVL1	ELOVL fatty acid elongase 1	NM_001256399	1111	1350	NM_001256399-1111-1350-+
81565	NDEL1	nudE neurodevelopment protein 1-like 1	NM_001025579	311	560	NM_001025579-311-560-+
57178	ZMIZ1	zinc finger, MIZ-type containing 1	NM_020338	4071	4670	NM_020338-4071-4670-+
26065	LSM14A	LSM14A, SCD6 homolog A (S. cerevisiae)	NM_001114093_2	833	1330	NM_001114093_2-833-1330-+
4141	MARS	methionyl-tRNA synthetase	NM_004990	2651	2885	NM_004990-2651-2885-+
868	CBLB	Cbl proto-oncogene B, E3 ubiquitin protein ligase	NM_170662	1891	2160	NM_170662-1891-2160-+
6515	SLC2A3	solute carrier family 2 (facilitated glucose transporter), member 3	NM_006931	1957	2208	NM_006931-1957-2208-+
3420	IDH3B	isocitrate dehydrogenase 3 (NAD+) beta	NM_006899	1421	1540	NM_006899-1421-1540-+
8602	NOP14	NOP14 nucleolar protein	NM_001291978	751	880	NM_001291978-751-880-+
7385	UQCRC2	ubiquinol-cytochrome c reductase core protein II	NM_003366	1541	1647	NM_003366-1541-1647-+
139818	DOCK11	dedicator of cytokinesis 11	NM_144658	881	1040	NM_144658-881-1040-+
10437	IFI30	interferon, gamma-inducible protein 30	NM_006332	891	1020	NM_006332-891-1020-+
7185	TRAF1	TNF receptor-associated factor 1	NM_005658	1821	2375	NM_005658-1821-2375-+
80727	TTYH3	tweety family member 3	NM_025250	3741	3890	NM_025250-3741-3890-+
91452	ACBD5	acyl-CoA binding domain containing 5	NM_001271512	1417	1770	NM_001271512-1417-1770-+
57680	CHD8	chromodomain helicase DNA binding protein 8	NM_001170629	6081	6360	NM_001170629-6081-6360-+
8085	KMT2D	lysine (K)-specific methyltransferase 2D	NM_003482	8631	8790	NM_003482-8631-8790-+
9238	TBRG4	transforming growth factor beta regulator 4	NM_004749	1931	2245	NM_004749-1931-2245-+
57655	GRAMD1A	GRAM domain containing 1A	NM_020895	2281	2427	NM_020895-2281-2427-+
51562	MBIP	MAP3K12 binding inhibitory protein 1	NM_016586	371	530	NM_016586-371-530-+
121665	SPPL3	signal peptide peptidase like 3	NM_139015	1671	2175	NM_139015-1671-2175-+
54625	PARP14	poly (ADP-ribose) polymerase family, member 14	NM_017554	4371	4620	NM_017554-4371-4620-+
57520	HECW2	HECT, C2 and WW domain containing E3 ubiquitin protein ligase 2	NM_020760	1221	1612	NM_020760-1221-1612-+
1939	EIF2D	eukaryotic translation initiation factor 2D	NM_006893	1951	2051	NM_006893-1951-2051-+
54904	WHSC1L1	Wolf-Hirschhorn syndrome candidate 1-like 1	NM_023034	701	1250	NM_023034-701-1250-+
1743	DLST	dihydrolipoamide S-succinyltransferase (E2 component of 2-oxo-glutarate complex)	NM_001933	1301	1570	NM_001933-1301-1570-+
64151	NCAPG	non-SMC condensin I complex, subunit G	NM_022346	2941	3160	NM_022346-2941-3160-+
84271	POLDIP3	polymerase (DNA-directed), delta interacting protein 3	NM_001278657	1381	1640	NM_001278657-1381-1640-+
6721	SREBF2	sterol regulatory element binding transcription factor 2	NM_004599	461	820	NM_004599-461-820-+
55884	WSB2	WD repeat and SOCS box containing 2	NM_018639	1281	1450	NM_018639-1281-1450-+
57658	CALCOCO1	calcium binding and coiled-coil domain 1	NM_020898	881	1140	NM_020898-881-1140-+
89781	HPS4	Hermansky-Pudlak syndrome 4	NM_022081	1601	1820	NM_022081-1601-1820-+
5824	PEX19	peroxisomal biogenesis factor 19	NM_002857	1561	1830	NM_002857-1561-1830-+
9921	RNF10	ring finger protein 10	NM_014868	341	530	NM_014868-341-530-+
3689	ITGB2	integrin, beta 2 (complement component 3 receptor 3 and 4 subunit)	NM_000211	2621	2948	NM_000211-2621-2948-+
65985	AACS	acetoacetyl-CoA synthetase	NM_023928	2181	2340	NM_023928-2181-2340-+
9785	DHX38	DEAH (Asp-Glu-Ala-His) box polypeptide 38	NM_014003	471	720	NM_014003-471-720-+
1182	CLCN3	chloride channel, voltage-sensitive 3	NM_173872	2471	2710	NM_173872-2471-2710-+
55768	NGLY1	N-glycanase 1	NM_018297	381	580	NM_018297-381-580-+
468	ATF4	activating transcription factor 4	NM_001675	1681	2020	NM_001675-1681-2020-+
10521	DDX17	DEAD (Asp-Glu-Ala-Asp) box helicase 17	NM_001098504	1514	2007	NM_001098504-1514-2007-+
4864	NPC1	Niemann-Pick disease, type C1	NM_000271	3971	4512	NM_000271-3971-4512-+
2664	GDI1	GDP dissociation inhibitor 1	NM_001493	2341	2477	NM_001493-2341-2477-+
55167	MSL2	male-specific lethal 2 homolog (Drosophila)	NM_018133	1801	2290	NM_018133-1801-2290-+
23223	RRP12	ribosomal RNA processing 12 homolog (S. cerevisiae)	NM_015179	3201	3780	NM_015179-3201-3780-+
10409	BASP1	brain abundant, membrane attached signal protein 1	NM_006317	721	830	NM_006317-721-830-+
9031	BAZ1B	bromodomain adjacent to zinc finger domain, 1B	NM_032408	4471	4590	NM_032408-4471-4590-+
83695	RHNO1	RAD9-HUS1-RAD1 interacting nuclear orphan 1	NM_001257097	831	1000	NM_001257097-831-1000-+
26031	OSBPL3	oxysterol binding protein-like 3	NM_015550	2841	3150	NM_015550-2841-3150-+
23478	SEC11A	SEC11 homolog A (S. cerevisiae)	NM_001271918	1351	1450	NM_001271918-1351-1450-+
29066	ZC3H7A	zinc finger CCCH-type containing 7A	NM_014153	2551	2770	NM_014153-2551-2770-+
1781	DYNC1I2	dynein, cytoplasmic 1, intermediate chain 2	NM_001378	691	892	NM_001378-691-892-+
51496	CTDSPL2	CTD (carboxy-terminal domain, RNA polymerase II, polypeptide A) small phosphatase like 2	NM_016396	441	845	NM_016396-441-845-+
5528	PPP2R5D	protein phosphatase 2, regulatory subunit B', delta	NM_001270476	231	450	NM_001270476-231-450-+
29927	SEC61A1	Sec61 alpha 1 subunit (S. cerevisiae)	NM_013336	2390	2780	NM_013336-2390-2780-+
5604	MAP2K1	mitogen-activated protein kinase kinase 1	NM_002755	471	729	NM_002755-471-729-+
3006	HIST1H1C	histone cluster 1, H1c	NM_005319	411	647	NM_005319-411-647-+
2068	ERCC2	excision repair cross-complementation group 2	NM_000400	811	980	NM_000400-811-980-+
23167	EFR3A	EFR3 homolog A (S. cerevisiae)	NM_015137	2351	2580	NM_015137-2351-2580-+
8085	KMT2D	lysine (K)-specific methyltransferase 2D	NM_003482	11871	12190	NM_003482-11871-12190-+
4927	NUP88	nucleoporin 88kDa	NM_002532	1833	2080	NM_002532-1833-2080-+
5037	PEBP1	phosphatidylethanolamine binding protein 1	NM_002567	931	1150	NM_002567-931-1150-+
9898	UBAP2L	ubiquitin associated protein 2-like	NM_001287816	1901	2110	NM_001287816-1901-2110-+
8402	SLC25A11	solute carrier family 25 (mitochondrial carrier; oxoglutarate carrier), member 11	NM_003562	1434	1633	NM_003562-1434-1633-+
26156	RSL1D1	ribosomal L1 domain containing 1	NM_015659	1321	1580	NM_015659-1321-1580-+
9031	BAZ1B	bromodomain adjacent to zinc finger domain, 1B	NM_032408	1451	1830	NM_032408-1451-1830-+
8454	CUL1	cullin 1	NM_003592	1121	1260	NM_003592-1121-1260-+
118788	PIK3AP1	phosphoinositide-3-kinase adaptor protein 1	NM_152309	2021	2240	NM_152309-2021-2240-+
3636	INPPL1	inositol polyphosphate phosphatase-like 1	NM_001567	3741	4010	NM_001567-3741-4010-+
11333	PDAP1	PDGFA associated protein 1	NM_014891	145	590	NM_014891-145-590-+
9909	DENND4B	DENN/MADD domain containing 4B	NM_014856	4731	4990	NM_014856-4731-4990-+
162394	SLFN5	schlafen family member 5	NM_144975	2371	2680	NM_144975-2371-2680-+
27309	ZNF330	zinc finger protein 330	NM_014487	961	1300	NM_014487-961-1300-+
57602	USP36	ubiquitin specific peptidase 36	NM_025090	1871	2090	NM_025090-1871-2090-+
64777	RMND5B	required for meiotic nuclear division 5 homolog B (S. cerevisiae)	NM_001288794	1601	1860	NM_001288794-1601-1860-+
11124	FAF1	Fas (TNFRSF6) associated factor 1	NM_007051	941	1110	NM_007051-941-1110-+
55252	ASXL2	additional sex combs like transcriptional regulator 2	NM_018263	3651	3890	NM_018263-3651-3890-+
7155	TOP2B	topoisomerase (DNA) II beta 180kDa	NM_001068	3891	4220	NM_001068-3891-4220-+
6518	SLC2A5	solute carrier family 2 (facilitated glucose/fructose transporter), member 5	NM_003039	1631	2020	NM_003039-1631-2020-+
53981	CPSF2	cleavage and polyadenylation specific factor 2, 100kDa	NM_017437	1291	1780	NM_017437-1291-1780-+
23376	UFL1	UFM1-specific ligase 1	NM_015323	1195	1530	NM_015323-1195-1530-+
23560	GTPBP4	GTP binding protein 4	NM_012341	1326	1728	NM_012341-1326-1728-+
1025	CDK9	cyclin-dependent kinase 9	NM_001261	1191	1600	NM_001261-1191-1600-+
8560	DEGS1	delta(4)-desaturase, sphingolipid 1	NM_003676	301	420	NM_003676-301-420-+
57095	PITHD1	PITH (C-terminal proteasome-interacting domain of thioredoxin-like) domain containing 1	NM_020362	671	960	NM_020362-671-960-+
2618	GART	phosphoribosylglycinamide formyltransferase, phosphoribosylglycinamide synthetase, phosphoribosylaminoimidazole synthetase	NM_001136005_2	1411	1610	NM_001136005_2-1411-1610-+
7443	VRK1	vaccinia related kinase 1	NM_003384	991	1295	NM_003384-991-1295-+
79039	DDX54	DEAD (Asp-Glu-Ala-Asp) box polypeptide 54	NM_001111322	2771	3061	NM_001111322-2771-3061-+
1643	DDB2	damage-specific DNA binding protein 2, 48kDa	NM_000107	1431	1831	NM_000107-1431-1831-+
2033	EP300	E1A binding protein p300	NM_001429	7351	7860	NM_001429-7351-7860-+
58508	KMT2C	lysine (K)-specific methyltransferase 2C	NM_170606	11231	11850	NM_170606-11231-11850-+
23229	ARHGEF9	Cdc42 guanine nucleotide exchange factor (GEF) 9	NM_015185	2031	2190	NM_015185-2031-2190-+
9898	UBAP2L	ubiquitin associated protein 2-like	NM_001287816	671	810	NM_001287816-671-810-+
3611	ILK	integrin-linked kinase	NM_001014795	1941	2060	NM_001014795-1941-2060-+
8826	IQGAP1	IQ motif containing GTPase activating protein 1	NM_003870	4291	4677	NM_003870-4291-4677-+
9371	KIF3B	kinesin family member 3B	NM_004798	341	510	NM_004798-341-510-+
9702	CEP57	centrosomal protein 57kDa	NM_001243776	1403	1781	NM_001243776-1403-1781-+
5905	RANGAP1	Ran GTPase activating protein 1	NM_001278651	2471	2650	NM_001278651-2471-2650-+
7812	CSDE1	cold shock domain containing E1, RNA-binding	NM_001242891	100	250	NM_001242891-100-250-+
10525	HYOU1	hypoxia up-regulated 1	NM_006389	2181	2390	NM_006389-2181-2390-+
29978	UBQLN2	ubiquilin 2	NM_013444	961	1130	NM_013444-961-1130-+
79869	CPSF7	cleavage and polyadenylation specific factor 7, 59kDa	NM_024811	2951	3220	NM_024811-2951-3220-+
11079	RER1	retention in endoplasmic reticulum sorting receptor 1	NM_007033	1121	1350	NM_007033-1121-1350-+
54906	FAM208B	family with sequence similarity 208, member B	NM_017782	3521	3680	NM_017782-3521-3680-+
1478	CSTF2	cleavage stimulation factor, 3' pre-RNA, subunit 2, 64kDa	NM_001325	1301	1500	NM_001325-1301-1500-+
53373	TPCN1	two pore segment channel 1	NM_001143819	2731	2830	NM_001143819-2731-2830-+
1665	DHX15	DEAH (Asp-Glu-Ala-His) box helicase 15	NM_001358	221	556	NM_001358-221-556-+
84231	TRAF7	TNF receptor-associated factor 7, E3 ubiquitin protein ligase	NM_032271	151	330	NM_032271-151-330-+
7186	TRAF2	TNF receptor-associated factor 2	NM_021138	1651	1800	NM_021138-1651-1800-+
1315	COPB1	coatomer protein complex, subunit beta 1	NM_016451	3041	3186	NM_016451-3041-3186-+
9794	MAML1	mastermind-like 1 (Drosophila)	NM_014757	991	1240	NM_014757-991-1240-+
3312	HSPA8	heat shock 70kDa protein 8	NM_006597	1741	1950	NM_006597-1741-1950-+
51366	UBR5	ubiquitin protein ligase E3 component n-recognin 5	NM_015902	6731	6970	NM_015902-6731-6970-+
11316	COPE	coatomer protein complex, subunit epsilon	NM_007263	1011	1118	NM_007263-1011-1118-+
10885	WDR3	WD repeat domain 3	NM_006784	2113	2434	NM_006784-2113-2434-+
5705	PSMC5	proteasome (prosome, macropain) 26S subunit, ATPase, 5	NM_001199163	1361	1485	NM_001199163-1361-1485-+
144108	SPTY2D1	SPT2, Suppressor of Ty, domain containing 1 (S. cerevisiae)	NM_194285	2011	2320	NM_194285-2011-2320-+
3054	HCFC1	host cell factor C1	NM_005334	41	555	NM_005334-41-555-+
51177	PLEKHO1	pleckstrin homology domain containing, family O member 1	NM_016274	1311	1590	NM_016274-1311-1590-+
4735	2015-09-02	septin 2	NM_001008491	1331	1600	NM_001008491-1331-1600-+
3688	ITGB1	integrin, beta 1 (fibronectin receptor, beta polypeptide, antigen CD29 includes MDF2, MSK12)	NM_002211	381	640	NM_002211-381-640-+
9595	CYTIP	cytohesin 1 interacting protein	NM_004288	751	900	NM_004288-751-900-+
60626	RIC8A	RIC8 guanine nucleotide exchange factor A	NM_021932	2971	3430	NM_021932-2971-3430-+
832	CAPZB	capping protein (actin filament) muscle Z-line, beta	NM_001206541	1631	1820	NM_001206541-1631-1820-+
64216	TFB2M	transcription factor B2, mitochondrial	NM_022366	1201	1414	NM_022366-1201-1414-+
123803	NTAN1	N-terminal asparagine amidase	NM_173474_2	911	1180	NM_173474_2-911-1180-+
5579	PRKCB	protein kinase C, beta	NM_002738	1121	1260	NM_002738-1121-1260-+
694	BTG1	B-cell translocation gene 1, anti-proliferative	NM_001731	491	920	NM_001731-491-920-+
57592	ZNF687	zinc finger protein 687	NM_020832	1401	1658	NM_020832-1401-1658-+
1938	EEF2	eukaryotic translation elongation factor 2	NM_001961	1631	1840	NM_001961-1631-1840-+
79893	GGNBP2	gametogenetin binding protein 2	NM_024835	1871	2000	NM_024835-1871-2000-+
1788	DNMT3A	DNA (cytosine-5-)-methyltransferase 3 alpha	NM_175629	441	808	NM_175629-441-808-+
57018	CCNL1	cyclin L1	NM_020307	1851	2401	NM_020307-1851-2401-+
3978	LIG1	ligase I, DNA, ATP-dependent	NM_000234	391	600	NM_000234-391-600-+
51582	AZIN1	antizyme inhibitor 1	NM_015878	1121	1360	NM_015878-1121-1360-+
26959	HBP1	HMG-box transcription factor 1	NM_012257	1298	1740	NM_012257-1298-1740-+
9887	SMG7	SMG7 nonsense mediated mRNA decay factor	NM_001174061	3751	3900	NM_001174061-3751-3900-+
9646	CTR9	CTR9, Paf1/RNA polymerase II complex component	NM_014633	3241	3730	NM_014633-3241-3730-+
6391	SDHC	succinate dehydrogenase complex, subunit C, integral membrane protein, 15kDa	NM_003001	987	1161	NM_003001-987-1161-+
56889	TM9SF3	transmembrane 9 superfamily member 3	NM_020123	311	730	NM_020123-311-730-+
10539	GLRX3	glutaredoxin 3	NM_001199868	691	850	NM_001199868-691-850-+
55159	RFWD3	ring finger and WD repeat domain 3	NM_018124	301	680	NM_018124-301-680-+
7174	TPP2	tripeptidyl peptidase II	NM_003291	2941	3260	NM_003291-2941-3260-+
8480	RAE1	ribonucleic acid export 1	NM_001015885	1461	1670	NM_001015885-1461-1670-+
2107	ETF1	eukaryotic translation termination factor 1	NM_001256302	1732	1998	NM_001256302-1732-1998-+
11180	WDR6	WD repeat domain 6	NM_018031	1231	1490	NM_018031-1231-1490-+
9921	RNF10	ring finger protein 10	NM_014868	2251	2420	NM_014868-2251-2420-+
55761	TTC17	tetratricopeptide repeat domain 17	NM_018259	2431	2738	NM_018259-2431-2738-+
23647	ARFIP2	ADP-ribosylation factor interacting protein 2	NM_001242854	1353	1570	NM_001242854-1353-1570-+
4668	NAGA	N-acetylgalactosaminidase, alpha-	NM_000262	1981	2270	NM_000262-1981-2270-+
8833	GMPS	guanine monphosphate synthase	NM_003875	2311	2419	NM_003875-2311-2419-+
26191	PTPN22	protein tyrosine phosphatase, non-receptor type 22 (lymphoid)	NM_015967	1001	1730	NM_015967-1001-1730-+
4841	NONO	non-POU domain containing, octamer-binding	NM_001145408	699	890	NM_001145408-699-890-+
10910	SUGT1	SGT1, suppressor of G2 allele of SKP1 (S. cerevisiae)	NM_001130912	885	1120	NM_001130912-885-1120-+
163	AP2B1	adaptor-related protein complex 2, beta 1 subunit	NM_001030006	2941	3210	NM_001030006-2941-3210-+
4048	LTA4H	leukotriene A4 hydrolase	NM_000895	321	420	NM_000895-321-420-+
1781	DYNC1I2	dynein, cytoplasmic 1, intermediate chain 2	NM_001378	2081	2255	NM_001378-2081-2255-+
23608	MKRN1	makorin ring finger protein 1	NM_013446	1431	1704	NM_013446-1431-1704-+
146206	RLTPR	RGD motif, leucine rich repeats, tropomodulin domain and proline-rich containing	NM_001013838	3399	3900	NM_001013838-3399-3900-+
10299	2015-03-06	membrane-associated ring finger (C3HC4) 6, E3 ubiquitin protein ligase	NM_005885	2911	3091	NM_005885-2911-3091-+
29117	BRD7	bromodomain containing 7	NM_001173984	321	510	NM_001173984-321-510-+
22803	XRN2	5'-3' exoribonuclease 2	NM_012255	1195	1440	NM_012255-1195-1440-+
3843	IPO5	importin 5	NM_002271	237	520	NM_002271-237-520-+
5187	PER1	period circadian clock 1	NM_002616	2981	3230	NM_002616-2981-3230-+
112770	GLMP	glycosylated lysosomal membrane protein	NM_001256609	1451	1849	NM_001256609-1451-1849-+
80142	PTGES2	prostaglandin E synthase 2	NM_025072	1341	1512	NM_025072-1341-1512-+
4800	NFYA	nuclear transcription factor Y, alpha	NM_002505	2035	2346	NM_002505-2035-2346-+
10956	OS9	osteosarcoma amplified 9, endoplasmic reticulum lectin	NM_006812	2241	2400	NM_006812-2241-2400-+
9689	BZW1	basic leucine zipper and W2 domains 1	NM_001207067	1211	1463	NM_001207067-1211-1463-+
3313	HSPA9	heat shock 70kDa protein 9 (mortalin)	NM_004134	1921	2432	NM_004134-1921-2432-+
7277	TUBA4A	tubulin, alpha 4a	NM_001278552	1731	1877	NM_001278552-1731-1877-+
8861	LDB1	LIM domain binding 1	NM_003893	1701	2051	NM_003893-1701-2051-+
9451	EIF2AK3	eukaryotic translation initiation factor 2-alpha kinase 3	NM_004836	2483	3240	NM_004836-2483-3240-+
8893	EIF2B5	eukaryotic translation initiation factor 2B, subunit 5 epsilon, 82kDa	NM_003907	1711	2068	NM_003907-1711-2068-+
51247	PAIP2	poly(A) binding protein interacting protein 2	NM_001033112	201	482	NM_001033112-201-482-+
7818	DAP3	death associated protein 3	NM_001199849	1351	1639	NM_001199849-1351-1639-+
261726	TIPRL	TOR signaling pathway regulator	NM_152902	801	1160	NM_152902-801-1160-+
6050	RNH1	ribonuclease/angiogenin inhibitor 1	NM_002939	1911	2028	NM_002939-1911-2028-+
8886	DDX18	DEAD (Asp-Glu-Ala-Asp) box polypeptide 18	NM_006773	87	670	NM_006773-87-670-+
10847	SRCAP	Snf2-related CREBBP activator protein	NM_006662	8501	8790	NM_006662-8501-8790-+
29888	STRN4	striatin, calmodulin binding protein 4	NM_001039877	731	950	NM_001039877-731-950-+
9766	SUSD6	sushi domain containing 6	NM_014734	1321	1600	NM_014734-1321-1600-+
5725	PTBP1	polypyrimidine tract binding protein 1	NM_002819	1921	2180	NM_002819-1921-2180-+
114034	TOE1	target of EGR1, member 1 (nuclear)	NM_025077	1671	1880	NM_025077-1671-1880-+
10067	SCAMP3	secretory carrier membrane protein 3	NM_005698_2	351	530	NM_005698_2-351-530-+
1938	EEF2	eukaryotic translation elongation factor 2	NM_001961	1041	1240	NM_001961-1041-1240-+
51231	VRK3	vaccinia related kinase 3	NM_016440	651	953	NM_016440-651-953-+
51125	GOLGA7	golgin A7	NM_001002296	481	957	NM_001002296-481-957-+
8085	KMT2D	lysine (K)-specific methyltransferase 2D	NM_003482	15061	15340	NM_003482-15061-15340-+
54853	WDR55	WD repeat domain 55	NM_017706	1042	1370	NM_017706-1042-1370-+
26112	CCDC69	coiled-coil domain containing 69	NM_015621	221	480	NM_015621-221-480-+
51646	YPEL5	yippee-like 5 (Drosophila)	NM_001127401	701	1160	NM_001127401-701-1160-+
79665	DHX40	DEAH (Asp-Glu-Ala-His) box polypeptide 40	NM_024612	2194	2770	NM_024612-2194-2770-+
80227	PAAF1	proteasomal ATPase-associated factor 1	NM_001267803	1366	1645	NM_001267803-1366-1645-+
83637	ZMIZ2	zinc finger, MIZ-type containing 2	NM_031449	3121	3290	NM_031449-3121-3290-+
23047	PDS5B	PDS5 cohesin associated factor B	NM_015032	3721	4531	NM_015032-3721-4531-+
3836	KPNA1	karyopherin alpha 1 (importin alpha 5)	NM_002264	173	389	NM_002264-173-389-+
1195	CLK1	CDC-like kinase 1	NM_001162407	440	1020	NM_001162407-440-1020-+
29927	SEC61A1	Sec61 alpha 1 subunit (S. cerevisiae)	NM_013336	3011	3230	NM_013336-3011-3230-+
5899	RALB	v-ral simian leukemia viral oncogene homolog B	NM_002881	601	981	NM_002881-601-981-+
7332	UBE2L3	ubiquitin-conjugating enzyme E2L 3	NM_003347	1721	1880	NM_003347-1721-1880-+
58477	SRPRB	signal recognition particle receptor, B subunit	NM_021203	1011	1204	NM_021203-1011-1204-+
10181	RBM5	RNA binding motif protein 5	NM_005778	1671	1851	NM_005778-1671-1851-+
56252	YLPM1	YLP motif containing 1	NM_019589	4261	4530	NM_019589-4261-4530-+
467	ATF3	activating transcription factor 3	NM_001040619	1011	1360	NM_001040619-1011-1360-+
1994	ELAVL1	ELAV like RNA binding protein 1	NM_001419	941	1179	NM_001419-941-1179-+
51271	UBAP1	ubiquitin associated protein 1	NM_001171203	751	1420	NM_001171203-751-1420-+
23152	CIC	capicua transcriptional repressor	NM_015125	2091	2280	NM_015125-2091-2280-+
9043	SPAG9	sperm associated antigen 9	NM_001130528	1455	1820	NM_001130528-1455-1820-+
3074	HEXB	hexosaminidase B (beta polypeptide)	NM_001292004	1831	1946	NM_001292004-1831-1946-+
6908	TBP	TATA box binding protein	NM_003194	631	790	NM_003194-631-790-+
80149	ZC3H12A	zinc finger CCCH-type containing 12A	NM_025079	221	474	NM_025079-221-474-+
22894	DIS3	DIS3 exosome endoribonuclease and 3'-5' exoribonuclease	NM_014953	1031	1410	NM_014953-1031-1410-+
9733	SART3	squamous cell carcinoma antigen recognized by T cells 3	NM_014706	3111	3480	NM_014706-3111-3480-+
55209	SETD5	SET domain containing 5	NM_001292043	1121	1400	NM_001292043-1121-1400-+
10054	UBA2	ubiquitin-like modifier activating enzyme 2	NM_005499	981	1100	NM_005499-981-1100-+
987	LRBA	LPS-responsive vesicle trafficking, beach and anchor containing	NM_001199282	5021	5520	NM_001199282-5021-5520-+
55066	PDPR	pyruvate dehydrogenase phosphatase regulatory subunit	NM_017990	6891	7300	NM_017990-6891-7300-+
23352	UBR4	ubiquitin protein ligase E3 component n-recognin 4	NM_020765	13091	13530	NM_020765-13091-13530-+
112399	EGLN3	egl-9 family hypoxia-inducible factor 3	NM_022073	1261	1753	NM_022073-1261-1753-+
55193	PBRM1	polybromo 1	NM_018313	2041	2510	NM_018313-2041-2510-+
144108	SPTY2D1	SPT2, Suppressor of Ty, domain containing 1 (S. cerevisiae)	NM_194285	308	948	NM_194285-308-948-+
51441	YTHDF2	YTH N(6)-methyladenosine RNA binding protein 2	NM_016258	1741	1920	NM_016258-1741-1920-+
26136	TES	testin LIM domain protein	NM_015641	641	980	NM_015641-641-980-+
57674	RNF213	ring finger protein 213	NM_001256071	7181	7360	NM_001256071-7181-7360-+
57215	THAP11	THAP domain containing 11	NM_020457	1071	1619	NM_020457-1071-1619-+
11176	BAZ2A	bromodomain adjacent to zinc finger domain, 2A	NM_001300905	511	940	NM_001300905-511-940-+
79770	TXNDC15	thioredoxin domain containing 15	NM_024715	801	1250	NM_024715-801-1250-+
8202	NCOA3	nuclear receptor coactivator 3	NM_181659	2331	2690	NM_181659-2331-2690-+
80325	ABTB1	ankyrin repeat and BTB (POZ) domain containing 1	NM_032548	1481	1580	NM_032548-1481-1580-+
11177	BAZ1A	bromodomain adjacent to zinc finger domain, 1A	NM_013448	4361	4610	NM_013448-4361-4610-+
3099	HK2	hexokinase 2	NM_000189	4561	4990	NM_000189-4561-4990-+
10075	HUWE1	HECT, UBA and WWE domain containing 1, E3 ubiquitin protein ligase	NM_031407	10431	10950	NM_031407-10431-10950-+
8553	BHLHE40	basic helix-loop-helix family, member e40	NM_003670	1391	1640	NM_003670-1391-1640-+
6734	SRPR	signal recognition particle receptor (docking protein)	NM_003139	2211	2450	NM_003139-2211-2450-+
9779	TBC1D5	TBC1 domain family, member 5	NM_014744	2901	3080	NM_014744-2901-3080-+
10280	SIGMAR1	sigma non-opioid intracellular receptor 1	NM_001282208	781	980	NM_001282208-781-980-+
10749	KIF1C	kinesin family member 1C	NM_006612	3721	3901	NM_006612-3721-3901-+
53349	ZFYVE1	zinc finger, FYVE domain containing 1	NM_021260	901	1170	NM_021260-901-1170-+
29102	DROSHA	drosha, ribonuclease type III	NM_013235	4321	4590	NM_013235-4321-4590-+
9128	PRPF4	pre-mRNA processing factor 4	NM_004697	1550	1770	NM_004697-1550-1770-+
9967	THRAP3	thyroid hormone receptor associated protein 3	NM_005119	1391	1800	NM_005119-1391-1800-+
10113	PREB	prolactin regulatory element binding	NM_013388	551	770	NM_013388-551-770-+
1312	COMT	catechol-O-methyltransferase	NM_000754	1211	1310	NM_000754-1211-1310-+
23185	LARP4B	La ribonucleoprotein domain family, member 4B	NM_015155	2218	2460	NM_015155-2218-2460-+
8021	NUP214	nucleoporin 214kDa	NM_005085	3971	4290	NM_005085-3971-4290-+
5536	PPP5C	protein phosphatase 5, catalytic subunit	NM_006247	391	510	NM_006247-391-510-+
639	PRDM1	PR domain containing 1, with ZNF domain	NM_001198	2461	2898	NM_001198-2461-2898-+
50515	CHST11	carbohydrate (chondroitin 4) sulfotransferase 11	NM_018413	1011	1780	NM_018413-1011-1780-+
84440	RAB11FIP4	RAB11 family interacting protein 4 (class II)	NM_032932	1214	1460	NM_032932-1214-1460-+
83939	EIF2A	eukaryotic translation initiation factor 2A, 65kDa	NM_032025	1291	1818	NM_032025-1291-1818-+
56965	PARP6	poly (ADP-ribose) polymerase family, member 6	NM_020214	2251	2620	NM_020214-2251-2620-+
200185	KRTCAP2	keratinocyte associated protein 2	NM_173852	351	519	NM_173852-351-519-+
5018	OXA1L	oxidase (cytochrome c) assembly 1-like	NM_005015	1391	1670	NM_005015-1391-1670-+
6599	SMARCC1	SWI/SNF related, matrix associated, actin dependent regulator of chromatin, subfamily c, member 1	NM_003074	3341	3550	NM_003074-3341-3550-+
3376	IARS	isoleucyl-tRNA synthetase	NM_013417	3361	3540	NM_013417-3361-3540-+
51593	SRRT	serrate, RNA effector molecule	NM_015908	1030	1516	NM_015908-1030-1516-+
53615	MBD3	methyl-CpG binding domain protein 3	NM_001281453	1281	1570	NM_001281453-1281-1570-+
55294	FBXW7	F-box and WD repeat domain containing 7, E3 ubiquitin protein ligase	NM_033632	2020	2607	NM_033632-2020-2607-+
2617	GARS	glycyl-tRNA synthetase	NM_002047	1911	2080	NM_002047-1911-2080-+
10678	B3GNT2	UDP-GlcNAc:betaGal beta-1,3-N-acetylglucosaminyltransferase 2	NM_006577	431	1100	NM_006577-431-1100-+
10765	KDM5B	lysine (K)-specific demethylase 5B	NM_006618	3521	4140	NM_006618-3521-4140-+
25793	FBXO7	F-box protein 7	NM_012179	371	630	NM_012179-371-630-+
9263	STK17A	serine/threonine kinase 17a	NM_004760	301	550	NM_004760-301-550-+
22919	MAPRE1	microtubule-associated protein, RP/EB family, member 1	NM_012325	801	1047	NM_012325-801-1047-+
9778	KIAA0232	KIAA0232	NM_014743	2911	3220	NM_014743-2911-3220-+
8553	BHLHE40	basic helix-loop-helix family, member e40	NM_003670	831	1160	NM_003670-831-1160-+
55168	MRPS18A	mitochondrial ribosomal protein S18A	NM_018135	671	880	NM_018135-671-880-+
64746	ACBD3	acyl-CoA binding domain containing 3	NM_022735	994	1609	NM_022735-994-1609-+
117246	FTSJ3	FtsJ homolog 3 (E. coli)	NM_017647	3131	3460	NM_017647-3131-3460-+
9869	SETDB1	SET domain, bifurcated 1	NM_001145415	2701	3123	NM_001145415-2701-3123-+
23008	KLHDC10	kelch domain containing 10	NM_014997	1221	1577	NM_014997-1221-1577-+
2194	FASN	fatty acid synthase	NM_004104	3511	3690	NM_004104-3511-3690-+
9807	IP6K1	inositol hexakisphosphate kinase 1	NM_001242829	1721	2132	NM_001242829-1721-2132-+
5209	PFKFB3	6-phosphofructo-2-kinase/fructose-2,6-biphosphatase 3	NM_004566	1991	2180	NM_004566-1991-2180-+
2033	EP300	E1A binding protein p300	NM_001429	711	1100	NM_001429-711-1100-+
6046	BRD2	bromodomain containing 2	NM_001291986	4281	4410	NM_001291986-4281-4410-+
84079	ANKRD27	ankyrin repeat domain 27 (VPS9 domain)	NM_032139	3041	3620	NM_032139-3041-3620-+
7764	ZNF217	zinc finger protein 217	NM_006526	2641	2800	NM_006526-2641-2800-+
6229	RPS24	ribosomal protein S24	NM_001142285	361	535	NM_001142285-361-535-+
64645	HIAT1	hippocampus abundant transcript 1	NM_033055	1151	1709	NM_033055-1151-1709-+
23550	PSD4	pleckstrin and Sec7 domain containing 4	NM_012455	3331	3490	NM_012455-3331-3490-+
26058	GIGYF2	GRB10 interacting GYF protein 2	NM_015575	4321	4520	NM_015575-4321-4520-+
23386	NUDCD3	NudC domain containing 3	NM_015332	1391	1570	NM_015332-1391-1570-+
57645	POGK	pogo transposable element with KRAB domain	NM_017542	1151	1380	NM_017542-1151-1380-+
55326	AGPAT5	1-acylglycerol-3-phosphate O-acyltransferase 5	NM_018361	1054	1699	NM_018361-1054-1699-+
11262	SP140	SP140 nuclear body protein	NM_007237	1511	1800	NM_007237-1511-1800-+
10847	SRCAP	Snf2-related CREBBP activator protein	NM_006662	5441	5630	NM_006662-5441-5630-+
85464	SSH2	slingshot protein phosphatase 2	NM_001282129	2971	4730	NM_001282129-2971-4730-+
3482	IGF2R	insulin-like growth factor 2 receptor	NM_000876	7125	7788	NM_000876-7125-7788-+
1982	EIF4G2	eukaryotic translation initiation factor 4 gamma, 2	NM_001172705	1991	2200	NM_001172705-1991-2200-+
4208	MEF2C	myocyte enhancer factor 2C	NM_002397	3721	3854	NM_002397-3721-3854-+
3716	JAK1	Janus kinase 1	NM_002227	1211	1438	NM_002227-1211-1438-+
79670	ZCCHC6	zinc finger, CCHC domain containing 6	NM_024617	2228	3050	NM_024617-2228-3050-+
22993	HMGXB3	HMG box domain containing 3	NM_014983	1071	1170	NM_014983-1071-1170-+
11124	FAF1	Fas (TNFRSF6) associated factor 1	NM_007051	1881	2200	NM_007051-1881-2200-+
29109	FHOD1	formin homology 2 domain containing 1	NM_013241	3541	3770	NM_013241-3541-3770-+
51218	GLRX5	glutaredoxin 5	NM_016417	421	710	NM_016417-421-710-+
11124	FAF1	Fas (TNFRSF6) associated factor 1	NM_007051	2421	2570	NM_007051-2421-2570-+
57820	CCNB1IP1	cyclin B1 interacting protein 1, E3 ubiquitin protein ligase	NM_182852	951	1262	NM_182852-951-1262-+
80196	RNF34	ring finger protein 34, E3 ubiquitin protein ligase	NM_194271	541	710	NM_194271-541-710-+
92979	2015-03-09	membrane-associated ring finger (C3HC4) 9	NM_138396	1191	1620	NM_138396-1191-1620-+
2959	GTF2B	general transcription factor IIB	NM_001514	971	1110	NM_001514-971-1110-+
6574	SLC20A1	solute carrier family 20 (phosphate transporter), member 1	NM_005415	1661	2037	NM_005415-1661-2037-+
51434	ANAPC7	anaphase promoting complex subunit 7	NM_016238	1561	2049	NM_016238-1561-2049-+
9727	RAB11FIP3	RAB11 family interacting protein 3 (class II)	NM_014700	2661	2770	NM_014700-2661-2770-+
10277	UBE4B	ubiquitination factor E4B	NM_001105562	4421	4870	NM_001105562-4421-4870-+
29072	SETD2	SET domain containing 2	NM_014159	5631	5830	NM_014159-5631-5830-+
102800317	LOC400927-CSNK1E	LOC400927-CSNK1E readthrough	NM_001289912	2061	2280	NM_001289912-2061-2280-+
23039	XPO7	exportin 7	NM_015024	3791	4040	NM_015024-3791-4040-+
22978	NT5C2	5'-nucleotidase, cytosolic II	NM_012229	1613	2000	NM_012229-1613-2000-+
6811	STX5	syntaxin 5	NM_001244666	1731	1830	NM_001244666-1731-1830-+
5339	PLEC	plectin	NM_201380	10551	10690	NM_201380-10551-10690-+
25970	SH2B1	SH2B adaptor protein 1	NM_015503	2721	2880	NM_015503-2721-2880-+
9698	PUM1	pumilio RNA-binding family member 1	NM_001020658	767	1004	NM_001020658-767-1004-+
9557	CHD1L	chromodomain helicase DNA binding protein 1-like	NM_004284	831	980	NM_004284-831-980-+
23135	KDM6B	lysine (K)-specific demethylase 6B	NM_001080424	3141	3500	NM_001080424-3141-3500-+
8509	NDST2	N-deacetylase/N-sulfotransferase (heparan glucosaminyl) 2	NM_003635	941	1680	NM_003635-941-1680-+
221037	JMJD1C	jumonji domain containing 1C	NM_032776	3291	3510	NM_032776-3291-3510-+
6494	SIPA1	signal-induced proliferation-associated 1	NM_153253	601	920	NM_153253-601-920-+
9583	ENTPD4	ectonucleoside triphosphate diphosphohydrolase 4	NM_004901	1311	1550	NM_004901-1311-1550-+
23550	PSD4	pleckstrin and Sec7 domain containing 4	NM_012455	841	1090	NM_012455-841-1090-+
23387	SIK3	SIK family kinase 3	NM_025164	2841	3520	NM_025164-2841-3520-+
23450	SF3B3	splicing factor 3b, subunit 3, 130kDa	NM_012426	2541	2780	NM_012426-2541-2780-+
79670	ZCCHC6	zinc finger, CCHC domain containing 6	NM_024617	4381	4720	NM_024617-4381-4720-+
27095	TRAPPC3	trafficking protein particle complex 3	NM_001270896	901	1123	NM_001270896-901-1123-+
51742	ARID4B	AT rich interactive domain 4B (RBP1-like)	NM_016374	2891	3340	NM_016374-2891-3340-+
57674	RNF213	ring finger protein 213	NM_001256071	6541	6770	NM_001256071-6541-6770-+
51768	TM7SF3	transmembrane 7 superfamily member 3	NM_016551	1651	1995	NM_016551-1651-1995-+
10659	CELF2	CUGBP, Elav-like family member 2	NM_001025077	5591	5910	NM_001025077-5591-5910-+
2956	MSH6	mutS homolog 6	NM_000179	1353	1714	NM_000179-1353-1714-+
26019	UPF2	UPF2 regulator of nonsense transcripts homolog (yeast)	NM_080599	4381	4600	NM_080599-4381-4600-+
23644	EDC4	enhancer of mRNA decapping 4	NM_014329	3681	3780	NM_014329-3681-3780-+
8452	CUL3	cullin 3	NM_003590	361	530	NM_003590-361-530-+
57148	RALGAPB	Ral GTPase activating protein, beta subunit (non-catalytic)	NM_020336	3441	3540	NM_020336-3441-3540-+
10084	PQBP1	polyglutamine binding protein 1	NM_005710	621	860	NM_005710-621-860-+
23633	KPNA6	karyopherin alpha 6 (importin alpha 7)	NM_012316	1321	1530	NM_012316-1321-1530-+
23351	KHNYN	KH and NYN domain containing	NM_015299	521	780	NM_015299-521-780-+
23173	METAP1	methionyl aminopeptidase 1	NM_015143	1331	1600	NM_015143-1331-1600-+
5695	PSMB7	proteasome (prosome, macropain) subunit, beta type, 7	NM_002799	821	1010	NM_002799-821-1010-+
8443	GNPAT	glyceronephosphate O-acyltransferase	NM_014236	1265	1588	NM_014236-1265-1588-+
55720	TSR1	TSR1, 20S rRNA accumulation, homolog (S. cerevisiae)	NM_018128	970	1140	NM_018128-970-1140-+
8943	AP3D1	adaptor-related protein complex 3, delta 1 subunit	NM_001261826	2915	3190	NM_001261826-2915-3190-+
7375	USP4	ubiquitin specific peptidase 4 (proto-oncogene)	NM_003363	2081	2250	NM_003363-2081-2250-+
23175	LPIN1	lipin 1	NM_001261428	2851	3100	NM_001261428-2851-3100-+
10617	STAMBP	STAM binding protein	NM_213622	821	1120	NM_213622-821-1120-+
29110	TBK1	TANK-binding kinase 1	NM_013254	1781	1970	NM_013254-1781-1970-+
1786	DNMT1	DNA (cytosine-5-)-methyltransferase 1	NM_001130823	711	1200	NM_001130823-711-1200-+
23258	DENND5A	DENN/MADD domain containing 5A	NM_015213	3991	4261	NM_015213-3991-4261-+
2773	GNAI3	guanine nucleotide binding protein (G protein), alpha inhibiting activity polypeptide 3	NM_006496	1181	1539	NM_006496-1181-1539-+
8723	SNX4	sorting nexin 4	NM_003794	951	1367	NM_003794-951-1367-+
8914	TIMELESS	timeless circadian clock	NM_003920	3601	3940	NM_003920-3601-3940-+
27043	PELP1	proline, glutamate and leucine rich protein 1	NM_014389	2421	2620	NM_014389-2421-2620-+
4134	MAP4	microtubule-associated protein 4	NM_002375	1481	1860	NM_002375-1481-1860-+
119559	SFXN4	sideroflexin 4	NM_213649	1021	1376	NM_213649-1021-1376-+
10594	PRPF8	pre-mRNA processing factor 8	NM_006445_2	4831	5010	NM_006445_2-4831-5010-+
55833	UBAP2	ubiquitin associated protein 2	NM_018449	401	710	NM_018449-401-710-+
2058	EPRS	glutamyl-prolyl-tRNA synthetase	NM_004446	3081	3340	NM_004446-3081-3340-+
1736	DKC1	dyskeratosis congenita 1, dyskerin	NM_001288747	136	340	NM_001288747-136-340-+
23352	UBR4	ubiquitin protein ligase E3 component n-recognin 4	NM_020765	8741	8960	NM_020765-8741-8960-+
23028	KDM1A	lysine (K)-specific demethylase 1A	NM_001009999	461	780	NM_001009999-461-780-+
9632	SEC24C	SEC24 family member C	NM_004922	3302	3541	NM_004922-3302-3541-+
3308	HSPA4	heat shock 70kDa protein 4	NM_002154	2381	2836	NM_002154-2381-2836-+
6239	RREB1	ras responsive element binding protein 1	NM_001003699	5401	5820	NM_001003699-5401-5820-+
819	CAMLG	calcium modulating ligand	NM_001745	911	1096	NM_001745-911-1096-+
25976	TIPARP	TCDD-inducible poly(ADP-ribose) polymerase	NM_001184717	1968	2320	NM_001184717-1968-2320-+
5089	PBX2	pre-B-cell leukemia homeobox 2	NM_002586	1881	2200	NM_002586-1881-2200-+
10897	YIF1A	Yip1 interacting factor homolog A (S. cerevisiae)	NM_020470	981	1090	NM_020470-981-1090-+
56650	CLDND1	claudin domain containing 1	NM_001040199	619	870	NM_001040199-619-870-+
1954	MEGF8	multiple EGF-like-domains 8	NM_001271938	8091	8210	NM_001271938-8091-8210-+
3376	IARS	isoleucyl-tRNA synthetase	NM_013417	441	759	NM_013417-441-759-+
6942	TCF20	transcription factor 20 (AR1)	NM_005650_2	5441	5620	NM_005650_2-5441-5620-+
11321	GPN1	GPN-loop GTPase 1	NM_007266	1021	1403	NM_007266-1021-1403-+
55109	AGGF1	angiogenic factor with G patch and FHA domains 1	NM_018046	2401	2622	NM_018046-2401-2622-+
55707	NECAP2	NECAP endocytosis associated 2	NM_018090	1061	1300	NM_018090-1061-1300-+
10985	GCN1L1	GCN1 general control of amino-acid synthesis 1-like 1 (yeast)	NM_006836	2361	2641	NM_006836-2361-2641-+
6601	SMARCC2	SWI/SNF related, matrix associated, actin dependent regulator of chromatin, subfamily c, member 2	NM_003075	2431	2688	NM_003075-2431-2688-+
79813	EHMT1	euchromatic histone-lysine N-methyltransferase 1	NM_024757	1191	1440	NM_024757-1191-1440-+
57187	THOC2	THO complex 2	NM_001081550	4261	4847	NM_001081550-4261-4847-+
9922	IQSEC1	IQ motif and Sec7 domain 1	NM_001134382	1221	1360	NM_001134382-1221-1360-+
57649	PHF12	PHD finger protein 12	NM_001033561	2081	2270	NM_001033561-2081-2270-+
23787	MTCH1	mitochondrial carrier 1	NM_001271641	1511	1930	NM_001271641-1511-1930-+
9793	CKAP5	cytoskeleton associated protein 5	NM_001008938	3461	3760	NM_001008938-3461-3760-+
158	ADSL	adenylosuccinate lyase	NM_000026	1201	1360	NM_000026-1201-1360-+
10898	CPSF4	cleavage and polyadenylation specific factor 4, 30kDa	NM_006693	761	1070	NM_006693-761-1070-+
6257	RXRB	retinoid X receptor, beta	NM_001270401_2	1001	1220	NM_001270401_2-1001-1220-+
10625	IVNS1ABP	influenza virus NS1A binding protein	NM_006469	451	670	NM_006469-451-670-+
3191	HNRNPL	heterogeneous nuclear ribonucleoprotein L	NM_001533	51	240	NM_001533-51-240-+
7090	TLE3	transducin-like enhancer of split 3	NM_005078	3421	3680	NM_005078-3421-3680-+
84280	BTBD10	BTB (POZ) domain containing 10	NM_001297742	1411	1660	NM_001297742-1411-1660-+
7155	TOP2B	topoisomerase (DNA) II beta 180kDa	NM_001068	4591	4850	NM_001068-4591-4850-+
6830	SUPT6H	suppressor of Ty 6 homolog (S. cerevisiae)	NM_003170	711	920	NM_003170-711-920-+
2768	GNA12	guanine nucleotide binding protein (G protein) alpha 12	NM_007353	951	1589	NM_007353-951-1589-+
3157	HMGCS1	3-hydroxy-3-methylglutaryl-CoA synthase 1 (soluble)	NM_001098272	2271	2450	NM_001098272-2271-2450-+
963	CD53	CD53 molecule	NM_001040033	41	160	NM_001040033-41-160-+
6294	SAFB	scaffold attachment factor B	NM_001201338	961	1200	NM_001201338-961-1200-+
55696	RBM22	RNA binding motif protein 22	NM_018047	1441	1660	NM_018047-1441-1660-+
55206	SBNO1	strawberry notch homolog 1 (Drosophila)	NM_001167856	2051	2330	NM_001167856-2051-2330-+
9812	KIAA0141	KIAA0141	NM_014773	2461	2900	NM_014773-2461-2900-+
283951	C16orf91	chromosome 16 open reading frame 91	NM_001272051	391	630	NM_001272051-391-630-+
9716	AQR	aquarius intron-binding spliceosomal factor	NM_014691	1991	2260	NM_014691-1991-2260-+
1662	DDX10	DEAD (Asp-Glu-Ala-Asp) box polypeptide 10	NM_004398	1701	2290	NM_004398-1701-2290-+
88455	ANKRD13A	ankyrin repeat domain 13A	NM_033121	1811	2170	NM_033121-1811-2170-+
55699	IARS2	isoleucyl-tRNA synthetase 2, mitochondrial	NM_018060	3061	3311	NM_018060-3061-3311-+
27072	VPS41	vacuolar protein sorting 41 homolog (S. cerevisiae)	NM_014396	1111	1310	NM_014396-1111-1310-+
8443	GNPAT	glyceronephosphate O-acyltransferase	NM_014236	2138	2494	NM_014236-2138-2494-+
22974	TPX2	TPX2, microtubule-associated	NM_012112	2682	3104	NM_012112-2682-3104-+
9123	SLC16A3	solute carrier family 16 (monocarboxylate transporter), member 3	NM_001206950	1390	1750	NM_001206950-1390-1750-+
23526	HMHA1	histocompatibility (minor) HA-1	NM_012292	1531	1730	NM_012292-1531-1730-+
11198	SUPT16H	suppressor of Ty 16 homolog (S. cerevisiae)	NM_007192	1601	1920	NM_007192-1601-1920-+
23152	CIC	capicua transcriptional repressor	NM_015125	1821	2000	NM_015125-1821-2000-+
55709	KBTBD4	kelch repeat and BTB (POZ) domain containing 4	NM_016506	201	300	NM_016506-201-300-+
115294	PCMTD1	protein-L-isoaspartate (D-aspartate) O-methyltransferase domain containing 1	NM_052937	1051	1520	NM_052937-1051-1520-+
9905	SGSM2	small G protein signaling modulator 2	NM_014853	3541	3720	NM_014853-3541-3720-+
4204	MECP2	methyl CpG binding protein 2	NM_004992	671	970	NM_004992-671-970-+
9703	KIAA0100	KIAA0100	NM_014680	2492	3103	NM_014680-2492-3103-+
3295	HSD17B4	hydroxysteroid (17-beta) dehydrogenase 4	NM_001199291	2491	2670	NM_001199291-2491-2670-+
9698	PUM1	pumilio RNA-binding family member 1	NM_001020658	2251	2480	NM_001020658-2251-2480-+
699	BUB1	BUB1 mitotic checkpoint serine/threonine kinase	NM_004336	1261	1380	NM_004336-1261-1380-+
10767	HBS1L	HBS1-like translational GTPase	NM_006620	1071	1200	NM_006620-1071-1200-+
23172	FAM175B	family with sequence similarity 175, member B	NM_032182	941	1542	NM_032182-941-1542-+
23533	PIK3R5	phosphoinositide-3-kinase, regulatory subunit 5	NM_001251851	1341	1706	NM_001251851-1341-1706-+
54467	ANKIB1	ankyrin repeat and IBR domain containing 1	NM_019004	2944	3743	NM_019004-2944-3743-+
2956	MSH6	mutS homolog 6	NM_000179	2823	3360	NM_000179-2823-3360-+
55625	ZDHHC7	zinc finger, DHHC-type containing 7	NM_001145548	1741	1990	NM_001145548-1741-1990-+
80208	SPG11	spastic paraplegia 11 (autosomal recessive)	NM_025137	5041	5280	NM_025137-5041-5280-+
5298	PI4KB	phosphatidylinositol 4-kinase, catalytic, beta	NM_001198773	3361	3620	NM_001198773-3361-3620-+
6811	STX5	syntaxin 5	NM_001244666	1341	1520	NM_001244666-1341-1520-+
328	APEX1	APEX nuclease (multifunctional DNA repair enzyme) 1	NM_001641	321	540	NM_001641-321-540-+
51020	HDDC2	HD domain containing 2	NM_016063	971	1081	NM_016063-971-1081-+
9929	JOSD1	Josephin domain containing 1	NM_014876	1141	1398	NM_014876-1141-1398-+
64770	CCDC14	coiled-coil domain containing 14	NM_022757	2191	2630	NM_022757-2191-2630-+
80155	NAA15	N(alpha)-acetyltransferase 15, NatA auxiliary subunit	NM_057175	1846	2225	NM_057175-1846-2225-+
25782	RAB3GAP2	RAB3 GTPase activating protein subunit 2 (non-catalytic)	NM_012414	2951	3170	NM_012414-2951-3170-+
57645	POGK	pogo transposable element with KRAB domain	NM_017542	1441	1630	NM_017542-1441-1630-+
7337	UBE3A	ubiquitin protein ligase E3A	NM_000462	1814	2370	NM_000462-1814-2370-+
4860	PNP	purine nucleoside phosphorylase	NM_000270	51	160	NM_000270-51-160-+
55140	ELP3	elongator acetyltransferase complex subunit 3	NM_018091	1741	2270	NM_018091-1741-2270-+
4650	MYO9B	myosin IXB	NM_001130065	151	370	NM_001130065-151-370-+
51115	RMDN1	regulator of microtubule dynamics 1	NM_016033	521	660	NM_016033-521-660-+
5863	RGL2	ral guanine nucleotide dissociation stimulator-like 2	NM_004761_5	2921	3170	NM_004761_5-2921-3170-+
9261	MAPKAPK2	mitogen-activated protein kinase-activated protein kinase 2	NM_004759	1841	2169	NM_004759-1841-2169-+
2673	GFPT1	glutamine--fructose-6-phosphate transaminase 1	NM_001244710	261	490	NM_001244710-261-490-+
57179	KIAA1191	KIAA1191	NM_020444	1021	1345	NM_020444-1021-1345-+
23526	HMHA1	histocompatibility (minor) HA-1	NM_012292	3571	3700	NM_012292-3571-3700-+
2879	GPX4	glutathione peroxidase 4	NM_001039848	901	1000	NM_001039848-901-1000-+
4249	MGAT5	mannosyl (alpha-1,6-)-glycoprotein beta-1,6-N-acetyl-glucosaminyltransferase	NM_002410	1	390	NM_002410-1-390-+
4205	MEF2A	myocyte enhancer factor 2A	NM_001171894	2691	2808	NM_001171894-2691-2808-+
30009	TBX21	T-box 21	NM_013351	1581	1980	NM_013351-1581-1980-+
7251	TSG101	tumor susceptibility 101	NM_006292	851	1080	NM_006292-851-1080-+
55339	WDR33	WD repeat domain 33	NM_018383	2591	2730	NM_018383-2591-2730-+
84172	POLR1B	polymerase (RNA) I polypeptide B, 128kDa	NM_001282777	3101	4191	NM_001282777-3101-4191-+
8533	COPS3	COP9 signalosome subunit 3	NM_003653	931	1160	NM_003653-931-1160-+
2983	GUCY1B3	guanylate cyclase 1, soluble, beta 3	NM_001291953	2021	2460	NM_001291953-2021-2460-+
7799	PRDM2	PR domain containing 2, with ZNF domain	NM_012231	4901	5110	NM_012231-4901-5110-+
5595	MAPK3	mitogen-activated protein kinase 3	NM_002746	1231	1437	NM_002746-1231-1437-+
79865	TREML2	triggering receptor expressed on myeloid cells-like 2	NM_024807	1141	1340	NM_024807-1141-1340-+
60	ACTB	actin, beta	NM_001101	1131	1500	NM_001101-1131-1500-+
23162	MAPK8IP3	mitogen-activated protein kinase 8 interacting protein 3	NM_015133	1511	1670	NM_015133-1511-1670-+
153241	CEP120	centrosomal protein 120kDa	NM_153223	2361	2460	NM_153223-2361-2460-+
55697	VAC14	Vac14 homolog (S. cerevisiae)	NM_018052	2601	2720	NM_018052-2601-2720-+
55148	UBR7	ubiquitin protein ligase E3 component n-recognin 7 (putative)	NM_175748	1191	1585	NM_175748-1191-1585-+
9785	DHX38	DEAH (Asp-Glu-Ala-His) box polypeptide 38	NM_014003	1741	1940	NM_014003-1741-1940-+
7184	HSP90B1	heat shock protein 90kDa beta (Grp94), member 1	NM_003299	2398	2630	NM_003299-2398-2630-+
7037	TFRC	transferrin receptor	NM_003234	244	380	NM_003234-244-380-+
57645	POGK	pogo transposable element with KRAB domain	NM_017542	2121	2420	NM_017542-2121-2420-+
5552	SRGN	serglycin	NM_002727	441	621	NM_002727-441-621-+
55269	PSPC1	paraspeckle component 1	NM_001042414	1101	1400	NM_001042414-1101-1400-+
8289	ARID1A	AT rich interactive domain 1A (SWI-like)	NM_006015	5571	6010	NM_006015-5571-6010-+
23160	WDR43	WD repeat domain 43	NM_015131	1241	1466	NM_015131-1241-1466-+
11253	MAN1B1	mannosidase, alpha, class 1B, member 1	NM_016219	2071	2747	NM_016219-2071-2747-+
8833	GMPS	guanine monphosphate synthase	NM_003875	841	1000	NM_003875-841-1000-+
123355	LRRC28	leucine rich repeat containing 28	NM_144598	221	480	NM_144598-221-480-+
64318	NOC3L	nucleolar complex associated 3 homolog (S. cerevisiae)	NM_022451	1341	1560	NM_022451-1341-1560-+
3185	HNRNPF	heterogeneous nuclear ribonucleoprotein F	NM_001098208	570	850	NM_001098208-570-850-+
11262	SP140	SP140 nuclear body protein	NM_007237	861	1060	NM_007237-861-1060-+
2286	FKBP2	FK506 binding protein 2, 13kDa	NM_004470	551	729	NM_004470-551-729-+
85369	STRIP1	striatin interacting protein 1	NM_033088	2349	2660	NM_033088-2349-2660-+
55832	CAND1	cullin-associated and neddylation-dissociated 1	NM_018448	1342	1560	NM_018448-1342-1560-+
7266	DNAJC7	DnaJ (Hsp40) homolog, subfamily C, member 7	NM_003315	311	420	NM_003315-311-420-+
473	RERE	arginine-glutamic acid dipeptide (RE) repeats	NM_012102	4861	5160	NM_012102-4861-5160-+
4170	MCL1	myeloid cell leukemia 1	NM_021960	611	1070	NM_021960-611-1070-+
2580	GAK	cyclin G associated kinase	NM_005255	2631	2910	NM_005255-2631-2910-+
9343	EFTUD2	elongation factor Tu GTP binding domain containing 2	NM_001258353	386	710	NM_001258353-386-710-+
11236	RNF139	ring finger protein 139	NM_007218	2241	2390	NM_007218-2241-2390-+
84067	FAM160A2	family with sequence similarity 160, member A2	NM_032127	2284	2530	NM_032127-2284-2530-+
23204	ARL6IP1	ADP-ribosylation factor-like 6 interacting protein 1	NM_015161	491	850	NM_015161-491-850-+
4189	DNAJB9	DnaJ (Hsp40) homolog, subfamily B, member 9	NM_012328	727	1120	NM_012328-727-1120-+
23135	KDM6B	lysine (K)-specific demethylase 6B	NM_001080424	2651	2960	NM_001080424-2651-2960-+
55339	WDR33	WD repeat domain 33	NM_018383	4121	4380	NM_018383-4121-4380-+
51094	ADIPOR1	adiponectin receptor 1	NM_001290557	1554	1980	NM_001290557-1554-1980-+
23534	TNPO3	transportin 3	NM_012470	84	470	NM_012470-84-470-+
9868	TOMM70A	translocase of outer mitochondrial membrane 70 homolog A (S. cerevisiae)	NM_014820	1041	1160	NM_014820-1041-1160-+
23168	RTF1	Rtf1, Paf1/RNA polymerase II complex component, homolog (S. cerevisiae)	NM_015138	2141	2370	NM_015138-2141-2370-+
222658	KCTD20	potassium channel tetramerization domain containing 20	NM_173562	1441	1654	NM_173562-1441-1654-+
3638	INSIG1	insulin induced gene 1	NM_005542	1111	1577	NM_005542-1111-1577-+
5298	PI4KB	phosphatidylinositol 4-kinase, catalytic, beta	NM_001198773	821	1540	NM_001198773-821-1540-+
6596	HLTF	helicase-like transcription factor	NM_003071	2051	2250	NM_003071-2051-2250-+
114803	MYSM1	Myb-like, SWIRM and MPN domains 1	NM_001085487	391	1290	NM_001085487-391-1290-+
1387	CREBBP	CREB binding protein	NM_004380	7271	7600	NM_004380-7271-7600-+
23761	PISD	phosphatidylserine decarboxylase	NM_014338	1381	1650	NM_014338-1381-1650-+
9780	PIEZO1	piezo-type mechanosensitive ion channel component 1	NM_001142864	7531	7787	NM_001142864-7531-7787-+
64601	VPS16	vacuolar protein sorting 16 homolog (S. cerevisiae)	NM_022575	2631	2740	NM_022575-2631-2740-+
23613	ZMYND8	zinc finger, MYND-type containing 8	NM_001281773	4001	4258	NM_001281773-4001-4258-+
51141	INSIG2	insulin induced gene 2	NM_016133	120	328	NM_016133-120-328-+
83442	SH3BGRL3	SH3 domain binding glutamate-rich protein like 3	NM_031286	771	951	NM_031286-771-951-+
4215	MAP3K3	mitogen-activated protein kinase kinase kinase 3	NM_203351	2151	2330	NM_203351-2151-2330-+
56339	METTL3	methyltransferase like 3	NM_019852	521	800	NM_019852-521-800-+
8241	RBM10	RNA binding motif protein 10	NM_001204468	2761	2970	NM_001204468-2761-2970-+
55700	MAP7D1	MAP7 domain containing 1	NM_018067	2291	2400	NM_018067-2291-2400-+
8729	GBF1	golgi brefeldin A resistant guanine nucleotide exchange factor 1	NM_004193	5981	6150	NM_004193-5981-6150-+
219988	PATL1	protein associated with topoisomerase II homolog 1 (yeast)	NM_152716	241	470	NM_152716-241-470-+
23152	CIC	capicua transcriptional repressor	NM_015125	4891	5050	NM_015125-4891-5050-+
152137	CCDC50	coiled-coil domain containing 50	NM_178335	821	1041	NM_178335-821-1041-+
3097	HIVEP2	human immunodeficiency virus type I enhancer binding protein 2	NM_006734	7651	8140	NM_006734-7651-8140-+
27032	ATP2C1	ATPase, Ca++ transporting, type 2C, member 1	NM_001199179	2311	2500	NM_001199179-2311-2500-+
5594	MAPK1	mitogen-activated protein kinase 1	NM_002745	1121	1375	NM_002745-1121-1375-+
4794	NFKBIE	nuclear factor of kappa light polypeptide gene enhancer in B-cells inhibitor, epsilon	NM_004556	1769	2053	NM_004556-1769-2053-+
8635	RNASET2	ribonuclease T2	NM_003730	1141	1240	NM_003730-1141-1240-+
9612	NCOR2	nuclear receptor corepressor 2	NM_006312	2351	2491	NM_006312-2351-2491-+
5160	PDHA1	pyruvate dehydrogenase (lipoamide) alpha 1	NM_001173454	1111	1320	NM_001173454-1111-1320-+
14	AAMP	angio-associated, migratory cell protein	NM_001087	211	380	NM_001087-211-380-+
989	2015-09-07	septin 7	NM_001788	831	940	NM_001788-831-940-+
8833	GMPS	guanine monphosphate synthase	NM_003875	1191	1450	NM_003875-1191-1450-+
9275	BCL7B	B-cell CLL/lymphoma 7B	NM_001301061	1186	1450	NM_001301061-1186-1450-+
8458	TTF2	transcription termination factor, RNA polymerase II	NM_003594	451	1008	NM_003594-451-1008-+
64786	TBC1D15	TBC1 domain family, member 15	NM_001146214	961	1250	NM_001146214-961-1250-+
699	BUB1	BUB1 mitotic checkpoint serine/threonine kinase	NM_004336	851	1010	NM_004336-851-1010-+
5707	PSMD1	proteasome (prosome, macropain) 26S subunit, non-ATPase, 1	NM_002807	501	730	NM_002807-501-730-+
90780	PYGO2	pygopus family PHD finger 2	NM_138300	1491	1660	NM_138300-1491-1660-+
7266	DNAJC7	DnaJ (Hsp40) homolog, subfamily C, member 7	NM_003315	1301	1520	NM_003315-1301-1520-+
1512	CTSH	cathepsin H	NM_004390	1261	1468	NM_004390-1261-1468-+
51667	NUB1	negative regulator of ubiquitin-like proteins 1	NM_001243351	513	788	NM_001243351-513-788-+
3054	HCFC1	host cell factor C1	NM_005334	3501	3690	NM_005334-3501-3690-+
84619	ZGPAT	zinc finger, CCCH-type with G patch domain	NM_032527	481	630	NM_032527-481-630-+
89781	HPS4	Hermansky-Pudlak syndrome 4	NM_022081	254	660	NM_022081-254-660-+
6723	SRM	spermidine synthase	NM_003132	1161	1268	NM_003132-1161-1268-+
53917	RAB24	RAB24, member RAS oncogene family	NM_001031677	1140	1349	NM_001031677-1140-1349-+
25870	SUMF2	sulfatase modifying factor 2	NM_015411	1041	1338	NM_015411-1041-1338-+
84919	PPP1R15B	protein phosphatase 1, regulatory subunit 15B	NM_032833	2321	2581	NM_032833-2321-2581-+
515	ATP5F1	ATP synthase, H+ transporting, mitochondrial Fo complex, subunit B1	NM_001688	1061	1227	NM_001688-1061-1227-+
9320	TRIP12	thyroid hormone receptor interactor 12	NM_001284214	4411	4690	NM_001284214-4411-4690-+
473	RERE	arginine-glutamic acid dipeptide (RE) repeats	NM_012102	4281	4438	NM_012102-4281-4438-+
27327	TNRC6A	trinucleotide repeat containing 6A	NM_014494	1921	2409	NM_014494-1921-2409-+
7347	UCHL3	ubiquitin carboxyl-terminal esterase L3 (ubiquitin thiolesterase)	NM_001270952	331	628	NM_001270952-331-628-+
9130	FAM50A	family with sequence similarity 50, member A	NM_004699	421	600	NM_004699-421-600-+
54832	VPS13C	vacuolar protein sorting 13 homolog C (S. cerevisiae)	NM_001018088	6071	6210	NM_001018088-6071-6210-+
1108	CHD4	chromodomain helicase DNA binding protein 4	NM_001273	2171	2400	NM_001273-2171-2400-+
5707	PSMD1	proteasome (prosome, macropain) 26S subunit, non-ATPase, 1	NM_002807	2621	2840	NM_002807-2621-2840-+
974	CD79B	CD79b molecule, immunoglobulin-associated beta	NM_001039933	911	1260	NM_001039933-911-1260-+
26277	TINF2	TERF1 (TRF1)-interacting nuclear factor 2	NM_012461	1221	1610	NM_012461-1221-1610-+
5902	RANBP1	RAN binding protein 1	NM_001278639	871	1078	NM_001278639-871-1078-+
5987	TRIM27	tripartite motif containing 27	NM_006510	761	950	NM_006510-761-950-+
201595	STT3B	STT3B, subunit of the oligosaccharyltransferase complex (catalytic)	NM_178862	951	1230	NM_178862-951-1230-+
6400	SEL1L	sel-1 suppressor of lin-12-like (C. elegans)	NM_005065	267	800	NM_005065-267-800-+
8504	PEX3	peroxisomal biogenesis factor 3	NM_003630	271	510	NM_003630-271-510-+
9703	KIAA0100	KIAA0100	NM_014680	5021	5230	NM_014680-5021-5230-+
3663	IRF5	interferon regulatory factor 5	NM_001098627	1663	2070	NM_001098627-1663-2070-+
23180	RFTN1	raftlin, lipid raft linker 1	NM_015150	1596	1855	NM_015150-1596-1855-+
4205	MEF2A	myocyte enhancer factor 2A	NM_001171894	1818	2182	NM_001171894-1818-2182-+
7515	XRCC1	X-ray repair complementing defective repair in Chinese hamster cells 1	NM_006297	801	970	NM_006297-801-970-+
5108	PCM1	pericentriolar material 1	NM_006197	3981	4340	NM_006197-3981-4340-+
10005	ACOT8	acyl-CoA thioesterase 8	NM_005469	551	710	NM_005469-551-710-+
2132	EXT2	exostosin glycosyltransferase 2	NM_001178083	2471	2690	NM_001178083-2471-2690-+
9170	LPAR2	lysophosphatidic acid receptor 2	NM_004720	1111	1480	NM_004720-1111-1480-+
1108	CHD4	chromodomain helicase DNA binding protein 4	NM_001273	4884	5299	NM_001273-4884-5299-+
25930	PTPN23	protein tyrosine phosphatase, non-receptor type 23	NM_015466	2181	2500	NM_015466-2181-2500-+
29946	SERTAD3	SERTA domain containing 3	NM_013368	701	910	NM_013368-701-910-+
55671	SMEK1	SMEK homolog 1, suppressor of mek1 (Dictyostelium)	NM_001284280	3231	3890	NM_001284280-3231-3890-+
653361	NCF1	neutrophil cytosolic factor 1	NM_000265	441	610	NM_000265-441-610-+
57720	GPR107	G protein-coupled receptor 107	NM_001136557	1941	2254	NM_001136557-1941-2254-+
6004	RGS16	regulator of G-protein signaling 16	NM_002928	1841	2020	NM_002928-1841-2020-+
90634	N4BP2L1	NEDD4 binding protein 2-like 1	NM_052818	565	870	NM_052818-565-870-+
54778	RNF111	ring finger protein 111	NM_001270528	824	1210	NM_001270528-824-1210-+
4012	LNPEP	leucyl/cystinyl aminopeptidase	NM_005575	611	1361	NM_005575-611-1361-+
56267	CCBL2	cysteine conjugate-beta lyase 2	NM_001008661	919	1080	NM_001008661-919-1080-+
55066	PDPR	pyruvate dehydrogenase phosphatase regulatory subunit	NM_017990	3193	3710	NM_017990-3193-3710-+
51631	LUC7L2	LUC7-like 2 (S. cerevisiae)	NM_001270643	1431	1690	NM_001270643-1431-1690-+
10250	SRRM1	serine/arginine repetitive matrix 1	NM_005839	651	750	NM_005839-651-750-+
11127	KIF3A	kinesin family member 3A	NM_001300791	1434	1920	NM_001300791-1434-1920-+
29102	DROSHA	drosha, ribonuclease type III	NM_013235	1111	1320	NM_013235-1111-1320-+
899	CCNF	cyclin F	NM_001761	2014	2637	NM_001761-2014-2637-+
1315	COPB1	coatomer protein complex, subunit beta 1	NM_016451	1674	1900	NM_016451-1674-1900-+
171023	ASXL1	additional sex combs like transcriptional regulator 1	NM_015338	2191	2360	NM_015338-2191-2360-+
9779	TBC1D5	TBC1 domain family, member 5	NM_014744	3891	4250	NM_014744-3891-4250-+
79084	WDR77	WD repeat domain 77	NM_024102	931	1390	NM_024102-931-1390-+
6867	TACC1	transforming, acidic coiled-coil containing protein 1	NM_006283	2141	2399	NM_006283-2141-2399-+
3030	HADHA	hydroxyacyl-CoA dehydrogenase/3-ketoacyl-CoA thiolase/enoyl-CoA hydratase (trifunctional protein), alpha subunit	NM_000182	2621	2802	NM_000182-2621-2802-+
3608	ILF2	interleukin enhancer binding factor 2	NM_001267809	1126	1434	NM_001267809-1126-1434-+
10765	KDM5B	lysine (K)-specific demethylase 5B	NM_006618	4221	4583	NM_006618-4221-4583-+
57704	GBA2	glucosidase, beta (bile acid) 2	NM_020944	3180	3470	NM_020944-3180-3470-+
84885	ZDHHC12	zinc finger, DHHC-type containing 12	NM_032799	641	800	NM_032799-641-800-+
55193	PBRM1	polybromo 1	NM_018313	1511	1980	NM_018313-1511-1980-+
55143	CDCA8	cell division cycle associated 8	NM_001256875	591	830	NM_001256875-591-830-+
64005	MYO1G	myosin IG	NM_033054	63	200	NM_033054-63-200-+
29855	UBN1	ubinuclein 1	NM_001079514	2671	2880	NM_001079514-2671-2880-+
7423	VEGFB	vascular endothelial growth factor B	NM_003377	991	1329	NM_003377-991-1329-+
23360	FNBP4	formin binding protein 4	NM_015308	1481	1620	NM_015308-1481-1620-+
55291	PPP6R3	protein phosphatase 6, regulatory subunit 3	NM_001164160	2961	3115	NM_001164160-2961-3115-+
79139	DERL1	derlin 1	NM_024295	913	1750	NM_024295-913-1750-+
7153	TOP2A	topoisomerase (DNA) II alpha 170kDa	NM_001067	3671	4110	NM_001067-3671-4110-+
4008	LMO7	LIM domain 7	NM_005358	4161	4360	NM_005358-4161-4360-+
23505	TMEM131	transmembrane protein 131	NM_015348	3841	4930	NM_015348-3841-4930-+
6509	SLC1A4	solute carrier family 1 (glutamate/neutral amino acid transporter), member 4	NM_003038	1661	2210	NM_003038-1661-2210-+
1267	CNP	2',3'-cyclic nucleotide 3' phosphodiesterase	NM_033133	521	810	NM_033133-521-810-+
6133	RPL9	ribosomal protein L9	NM_001024921	694	829	NM_001024921-694-829-+
5786	PTPRA	protein tyrosine phosphatase, receptor type, A	NM_002836	791	1060	NM_002836-791-1060-+
23582	CCNDBP1	cyclin D-type binding-protein 1	NM_012142	801	1069	NM_012142-801-1069-+
5698	PSMB9	proteasome (prosome, macropain) subunit, beta type, 9	NM_002800_7	51	150	NM_002800_7-51-150-+
5533	PPP3CC	protein phosphatase 3, catalytic subunit, gamma isozyme	NM_001243974	1871	2114	NM_001243974-1871-2114-+
6829	SUPT5H	suppressor of Ty 5 homolog (S. cerevisiae)	NM_003169	231	590	NM_003169-231-590-+
79892	MCMBP	minichromosome maintenance complex binding protein	NM_024834	2107	2342	NM_024834-2107-2342-+
54148	MRPL39	mitochondrial ribosomal protein L39	NM_080794	671	810	NM_080794-671-810-+
55486	PARL	presenilin associated, rhomboid-like	NM_018622	1071	1290	NM_018622-1071-1290-+
4898	NRD1	nardilysin (N-arginine dibasic convertase)	NM_002525	451	934	NM_002525-451-934-+
10949	HNRNPA0	heterogeneous nuclear ribonucleoprotein A0	NM_006805	291	530	NM_006805-291-530-+
8525	DGKZ	diacylglycerol kinase, zeta	NM_001105540	2971	3070	NM_001105540-2971-3070-+
8943	AP3D1	adaptor-related protein complex 3, delta 1 subunit	NM_001261826	2301	2580	NM_001261826-2301-2580-+
10869	USP19	ubiquitin specific peptidase 19	NM_001199160	1891	2060	NM_001199160-1891-2060-+
25853	DCAF12	DDB1 and CUL4 associated factor 12	NM_015397	1571	1770	NM_015397-1571-1770-+
10554	AGPAT1	1-acylglycerol-3-phosphate O-acyltransferase 1	NM_006411	1241	1597	NM_006411-1241-1597-+
51755	CDK12	cyclin-dependent kinase 12	NM_016507	811	1290	NM_016507-811-1290-+
79065	ATG9A	autophagy related 9A	NM_001077198	3011	3190	NM_001077198-3011-3190-+
9128	PRPF4	pre-mRNA processing factor 4	NM_004697	1851	2020	NM_004697-1851-2020-+
10106	CTDSP2	CTD (carboxy-terminal domain, RNA polymerase II, polypeptide A) small phosphatase 2	NM_005730	1312	1746	NM_005730-1312-1746-+
5528	PPP2R5D	protein phosphatase 2, regulatory subunit B', delta	NM_001270476	2551	2791	NM_001270476-2551-2791-+
55379	LRRC59	leucine rich repeat containing 59	NM_018509	661	934	NM_018509-661-934-+
1859	DYRK1A	dual-specificity tyrosine-(Y)-phosphorylation regulated kinase 1A	NM_130436	3201	3940	NM_130436-3201-3940-+
23299	BICD2	bicaudal D homolog 2 (Drosophila)	NM_001003800	1181	1410	NM_001003800-1181-1410-+
9780	PIEZO1	piezo-type mechanosensitive ion channel component 1	NM_001142864	4291	4640	NM_001142864-4291-4640-+
23352	UBR4	ubiquitin protein ligase E3 component n-recognin 4	NM_020765	14251	14640	NM_020765-14251-14640-+
1387	CREBBP	CREB binding protein	NM_004380	391	540	NM_004380-391-540-+
23351	KHNYN	KH and NYN domain containing	NM_015299	2021	2301	NM_015299-2021-2301-+
63935	PCIF1	PDX1 C-terminal inhibiting factor 1	NM_022104	671	830	NM_022104-671-830-+
51147	ING4	inhibitor of growth family, member 4	NM_001127582	351	560	NM_001127582-351-560-+
9557	CHD1L	chromodomain helicase DNA binding protein 1-like	NM_004284	1651	1850	NM_004284-1651-1850-+
10075	HUWE1	HECT, UBA and WWE domain containing 1, E3 ubiquitin protein ligase	NM_031407	7381	7870	NM_031407-7381-7870-+
29102	DROSHA	drosha, ribonuclease type III	NM_013235	1368	1600	NM_013235-1368-1600-+
23216	TBC1D1	TBC1 (tre-2/USP6, BUB2, cdc16) domain family, member 1	NM_015173	1091	1300	NM_015173-1091-1300-+
51100	SH3GLB1	SH3-domain GRB2-like endophilin B1	NM_001206651	1351	1635	NM_001206651-1351-1635-+
813	CALU	calumenin	NM_001199672	1071	1280	NM_001199672-1071-1280-+
8878	SQSTM1	sequestosome 1	NM_001142298	861	1080	NM_001142298-861-1080-+
664	BNIP3	BCL2/adenovirus E1B 19kDa interacting protein 3	NM_004052	291	530	NM_004052-291-530-+
30	ACAA1	acetyl-CoA acyltransferase 1	NM_001607	1521	1710	NM_001607-1521-1710-+
10906	TRAFD1	TRAF-type zinc finger domain containing 1	NM_001143906	853	1410	NM_001143906-853-1410-+
56890	MDM1	Mdm1 nuclear protein homolog (mouse)	NM_017440	1471	1630	NM_017440-1471-1630-+
9567	GTPBP1	GTP binding protein 1	NM_004286	671	860	NM_004286-671-860-+
9937	DCLRE1A	DNA cross-link repair 1A	NM_014881	2781	2900	NM_014881-2781-2900-+
57492	ARID1B	AT rich interactive domain 1B (SWI1-like)	NM_020732	6109	6664	NM_020732-6109-6664-+
6515	SLC2A3	solute carrier family 2 (facilitated glucose transporter), member 3	NM_006931	1589	1956	NM_006931-1589-1956-+
8085	KMT2D	lysine (K)-specific methyltransferase 2D	NM_003482	14731	14940	NM_003482-14731-14940-+
84196	USP48	ubiquitin specific peptidase 48	NM_032236	2801	3068	NM_032236-2801-3068-+
113174	SAAL1	serum amyloid A-like 1	NM_138421	1071	1240	NM_138421-1071-1240-+
116064	LRRC58	leucine rich repeat containing 58	NM_001099678	1091	1395	NM_001099678-1091-1395-+
55843	ARHGAP15	Rho GTPase activating protein 15	NM_018460	201	440	NM_018460-201-440-+
219988	PATL1	protein associated with topoisomerase II homolog 1 (yeast)	NM_152716	1631	1750	NM_152716-1631-1750-+
60560	NAA35	N(alpha)-acetyltransferase 35, NatC auxiliary subunit	NM_024635	681	877	NM_024635-681-877-+
55031	USP47	ubiquitin specific peptidase 47	NM_001282659	2391	2677	NM_001282659-2391-2677-+
203069	R3HCC1	R3H domain and coiled-coil containing 1	NM_001136108	521	1020	NM_001136108-521-1020-+
118	ADD1	adducin 1 (alpha)	NM_001286645	921	1160	NM_001286645-921-1160-+
6432	SRSF7	serine/arginine-rich splicing factor 7	NM_001031684	141	240	NM_001031684-141-240-+
79792	GSDMD	gasdermin D	NM_001166237_2	2061	2270	NM_001166237_2-2061-2270-+
254531	LPCAT4	lysophosphatidylcholine acyltransferase 4	NM_153613	1491	1753	NM_153613-1491-1753-+
996	CDC27	cell division cycle 27	NM_001114091	2471	2961	NM_001114091-2471-2961-+
7019	TFAM	transcription factor A, mitochondrial	NM_003201	1111	1470	NM_003201-1111-1470-+
23126	POGZ	pogo transposable element with ZNF domain	NM_015100	6181	6450	NM_015100-6181-6450-+
116984	ARAP2	ArfGAP with RhoGAP domain, ankyrin repeat and PH domain 2	NM_015230	5021	5477	NM_015230-5021-5477-+
157922	CAMSAP1	calmodulin regulated spectrin-associated protein 1	NM_015447	4591	4920	NM_015447-4591-4920-+
9044	BTAF1	BTAF1 RNA polymerase II, B-TFIID transcription factor-associated, 170kDa	NM_003972	3751	3853	NM_003972-3751-3853-+
9557	CHD1L	chromodomain helicase DNA binding protein 1-like	NM_004284	1904	2167	NM_004284-1904-2167-+
6867	TACC1	transforming, acidic coiled-coil containing protein 1	NM_006283	1151	1810	NM_006283-1151-1810-+
5469	MED1	mediator complex subunit 1	NM_004774	4101	4870	NM_004774-4101-4870-+
11073	TOPBP1	topoisomerase (DNA) II binding protein 1	NM_007027	3781	3936	NM_007027-3781-3936-+
23438	HARS2	histidyl-tRNA synthetase 2, mitochondrial	NM_012208	2181	2469	NM_012208-2181-2469-+
10105	PPIF	peptidylprolyl isomerase F	NM_005729	891	1200	NM_005729-891-1200-+
5704	PSMC4	proteasome (prosome, macropain) 26S subunit, ATPase, 4	NM_006503	166	470	NM_006503-166-470-+
221472	FGD2	FYVE, RhoGEF and PH domain containing 2	NM_173558	2131	2330	NM_173558-2131-2330-+
5700	PSMC1	proteasome (prosome, macropain) 26S subunit, ATPase, 1	NM_002802	32	390	NM_002802-32-390-+
66008	TRAK2	trafficking protein, kinesin binding 2	NM_015049	3211	3417	NM_015049-3211-3417-+
51307	FAM53C	family with sequence similarity 53, member C	NM_001135647	301	480	NM_001135647-301-480-+
57498	KIDINS220	kinase D-interacting substrate, 220kDa	NM_020738	5101	5970	NM_020738-5101-5970-+
3460	IFNGR2	interferon gamma receptor 2 (interferon gamma transducer 1)	NM_005534	1531	1860	NM_005534-1531-1860-+
83440	ADPGK	ADP-dependent glucokinase	NM_031284	1301	1670	NM_031284-1301-1670-+
22828	SCAF8	SR-related CTD-associated factor 8	NM_014892	3041	3490	NM_014892-3041-3490-+
23013	SPEN	spen family transcriptional repressor	NM_015001	571	760	NM_015001-571-760-+
1639	DCTN1	dynactin 1	NM_004082	1601	1800	NM_004082-1601-1800-+
7009	TMBIM6	transmembrane BAX inhibitor motif containing 6	NM_001098576	1191	1430	NM_001098576-1191-1430-+
10988	METAP2	methionyl aminopeptidase 2	NM_006838	231	580	NM_006838-231-580-+
9887	SMG7	SMG7 nonsense mediated mRNA decay factor	NM_001174061	1771	2238	NM_001174061-1771-2238-+
9785	DHX38	DEAH (Asp-Glu-Ala-His) box polypeptide 38	NM_014003	1291	1390	NM_014003-1291-1390-+
54529	ASNSD1	asparagine synthetase domain containing 1	NM_019048	1566	1830	NM_019048-1566-1830-+
57680	CHD8	chromodomain helicase DNA binding protein 8	NM_001170629	7591	8200	NM_001170629-7591-8200-+
57455	REXO1	REX1, RNA exonuclease 1 homolog (S. cerevisiae)	NM_020695	1221	1440	NM_020695-1221-1440-+
58508	KMT2C	lysine (K)-specific methyltransferase 2C	NM_170606	8221	8980	NM_170606-8221-8980-+
51400	PPME1	protein phosphatase methylesterase 1	NM_001271593	1210	1360	NM_001271593-1210-1360-+
23394	ADNP	activity-dependent neuroprotector homeobox	NM_001282531	3261	3440	NM_001282531-3261-3440-+
5073	PARN	poly(A)-specific ribonuclease	NM_002582	771	990	NM_002582-771-990-+
23244	PDS5A	PDS5 cohesin associated factor A	NM_001100399	4081	4913	NM_001100399-4081-4913-+
6733	SRPK2	SRSF protein kinase 2	NM_182691	1007	1680	NM_182691-1007-1680-+
79039	DDX54	DEAD (Asp-Glu-Ala-Asp) box polypeptide 54	NM_001111322	1901	2060	NM_001111322-1901-2060-+
23613	ZMYND8	zinc finger, MYND-type containing 8	NM_001281773	2301	2610	NM_001281773-2301-2610-+
57606	SLAIN2	SLAIN motif family, member 2	NM_020846	1851	2068	NM_020846-1851-2068-+
55291	PPP6R3	protein phosphatase 6, regulatory subunit 3	NM_001164160	2111	2353	NM_001164160-2111-2353-+
79048	SECISBP2	SECIS binding protein 2	NM_001282690	2671	2910	NM_001282690-2671-2910-+
1031	CDKN2C	cyclin-dependent kinase inhibitor 2C (p18, inhibits CDK4)	NM_001262	1401	1530	NM_001262-1401-1530-+
11340	EXOSC8	exosome component 8	NM_181503	928	1155	NM_181503-928-1155-+
10270	AKAP8	A kinase (PRKA) anchor protein 8	NM_005858	1991	2140	NM_005858-1991-2140-+
10014	HDAC5	histone deacetylase 5	NM_001015053	701	930	NM_001015053-701-930-+
6651	SON	SON DNA binding protein	NM_138927	4521	4760	NM_138927-4521-4760-+
114885	OSBPL11	oxysterol binding protein-like 11	NM_022776	3031	3230	NM_022776-3031-3230-+
25942	SIN3A	SIN3 transcription regulator family member A	NM_001145358	2751	2870	NM_001145358-2751-2870-+
8925	HERC1	HECT and RLD domain containing E3 ubiquitin protein ligase family member 1	NM_003922	6741	7160	NM_003922-6741-7160-+
10659	CELF2	CUGBP, Elav-like family member 2	NM_001025077	125	320	NM_001025077-125-320-+
26233	FBXL6	F-box and leucine-rich repeat protein 6	NM_012162	1611	1770	NM_012162-1611-1770-+
83666	PARP9	poly (ADP-ribose) polymerase family, member 9	NM_001146106	671	1130	NM_001146106-671-1130-+
23082	PPRC1	peroxisome proliferator-activated receptor gamma, coactivator-related 1	NM_015062	1661	1897	NM_015062-1661-1897-+
115024	NT5C3B	5'-nucleotidase, cytosolic IIIB	NM_052935	1061	1270	NM_052935-1061-1270-+
26999	CYFIP2	cytoplasmic FMR1 interacting protein 2	NM_014376	232	700	NM_014376-232-700-+
51366	UBR5	ubiquitin protein ligase E3 component n-recognin 5	NM_015902	8641	8837	NM_015902-8641-8837-+
65123	INTS3	integrator complex subunit 3	NM_023015_2	3921	4150	NM_023015_2-3921-4150-+
10983	CCNI	cyclin I	NM_006835	1371	1610	NM_006835-1371-1610-+
9728	SECISBP2L	SECIS binding protein 2-like	NM_001193489	2824	3660	NM_001193489-2824-3660-+
9744	ACAP1	ArfGAP with coiled-coil, ankyrin repeat and PH domains 1	NM_014716	911	1070	NM_014716-911-1070-+
8895	CPNE3	copine III	NM_003909	1671	1940	NM_003909-1671-1940-+
10245	TIMM17B	translocase of inner mitochondrial membrane 17 homolog B (yeast)	NM_001167947	721	850	NM_001167947-721-850-+
5859	QARS	glutaminyl-tRNA synthetase	NM_005051	1681	1830	NM_005051-1681-1830-+
11235	PDCD10	programmed cell death 10	NM_007217	581	920	NM_007217-581-920-+
3054	HCFC1	host cell factor C1	NM_005334	4811	4930	NM_005334-4811-4930-+
56886	UGGT1	UDP-glucose glycoprotein glucosyltransferase 1	NM_020120	4647	5009	NM_020120-4647-5009-+
22992	KDM2A	lysine (K)-specific demethylase 2A	NM_012308	3261	3360	NM_012308-3261-3360-+
1788	DNMT3A	DNA (cytosine-5-)-methyltransferase 3 alpha	NM_175629	231	380	NM_175629-231-380-+
3326	HSP90AB1	heat shock protein 90kDa alpha (cytosolic), class B member 1	NM_001271969	821	1160	NM_001271969-821-1160-+
8565	YARS	tyrosyl-tRNA synthetase	NM_003680	2381	2640	NM_003680-2381-2640-+
85364	ZCCHC3	zinc finger, CCHC domain containing 3	NM_033089	651	956	NM_033089-651-956-+
4350	MPG	N-methylpurine-DNA glycosylase	NM_002434	901	1050	NM_002434-901-1050-+
6599	SMARCC1	SWI/SNF related, matrix associated, actin dependent regulator of chromatin, subfamily c, member 1	NM_003074	2351	2765	NM_003074-2351-2765-+
10009	ZBTB33	zinc finger and BTB domain containing 33	NM_001184742	1111	2390	NM_001184742-1111-2390-+
9337	CNOT8	CCR4-NOT transcription complex, subunit 8	NM_004779	1021	1550	NM_004779-1021-1550-+
26504	CNNM4	cyclin and CBS domain divalent metal cation transport mediator 4	NM_020184	2971	3270	NM_020184-2971-3270-+
3156	HMGCR	3-hydroxy-3-methylglutaryl-CoA reductase	NM_000859	2701	2949	NM_000859-2701-2949-+
5037	PEBP1	phosphatidylethanolamine binding protein 1	NM_002567	1381	1487	NM_002567-1381-1487-+
54765	TRIM44	tripartite motif containing 44	NM_017583	561	884	NM_017583-561-884-+
11051	NUDT21	nudix (nucleoside diphosphate linked moiety X)-type motif 21	NM_007006	1656	1940	NM_007006-1656-1940-+
7532	YWHAG	tyrosine 3-monooxygenase/tryptophan 5-monooxygenase activation protein, gamma	NM_012479	411	1008	NM_012479-411-1008-+
4905	NSF	N-ethylmaleimide-sensitive factor	NM_006178	2241	2480	NM_006178-2241-2480-+
23318	ZCCHC11	zinc finger, CCHC domain containing 11	NM_001009881	641	810	NM_001009881-641-810-+
1736	DKC1	dyskeratosis congenita 1, dyskerin	NM_001288747	1970	2364	NM_001288747-1970-2364-+
51366	UBR5	ubiquitin protein ligase E3 component n-recognin 5	NM_015902	5752	5984	NM_015902-5752-5984-+
8887	TAX1BP1	Tax1 (human T-cell leukemia virus type I) binding protein 1	NM_006024	591	1160	NM_006024-591-1160-+
116150	NUS1	nuclear undecaprenyl pyrophosphate synthase 1 homolog (S. cerevisiae)	NM_138459	721	907	NM_138459-721-907-+
55644	OSGEP	O-sialoglycoprotein endopeptidase	NM_017807	1301	1539	NM_017807-1301-1539-+
9344	TAOK2	TAO kinase 2	NM_016151	2091	2510	NM_016151-2091-2510-+
2033	EP300	E1A binding protein p300	NM_001429	4921	5190	NM_001429-4921-5190-+
53339	BTBD1	BTB (POZ) domain containing 1	NM_025238	2311	2604	NM_025238-2311-2604-+
24148	PRPF6	pre-mRNA processing factor 6	NM_012469	491	660	NM_012469-491-660-+
3949	LDLR	low density lipoprotein receptor	NM_000527	2741	3090	NM_000527-2741-3090-+
23598	PATZ1	POZ (BTB) and AT hook containing zinc finger 1	NM_014323	1111	1510	NM_014323-1111-1510-+
4998	ORC1	origin recognition complex, subunit 1	NM_004153	711	900	NM_004153-711-900-+
1487	CTBP1	C-terminal binding protein 1	NM_001012614	1691	1940	NM_001012614-1691-1940-+
10477	UBE2E3	ubiquitin-conjugating enzyme E2E 3	NM_006357	981	1200	NM_006357-981-1200-+
55146	ZDHHC4	zinc finger, DHHC-type containing 4	NM_001134387	1221	1545	NM_001134387-1221-1545-+
6687	SPG7	spastic paraplegia 7 (pure and complicated autosomal recessive)	NM_003119	2161	2440	NM_003119-2161-2440-+
58513	EPS15L1	epidermal growth factor receptor pathway substrate 15-like 1	NM_001258376	1151	1740	NM_001258376-1151-1740-+
3566	IL4R	interleukin 4 receptor	NM_001257407	1471	1740	NM_001257407-1471-1740-+
29116	MYLIP	myosin regulatory light chain interacting protein	NM_013262	1071	1880	NM_013262-1071-1880-+
4043	LRPAP1	low density lipoprotein receptor-related protein associated protein 1	NM_002337	1191	1400	NM_002337-1191-1400-+
6892	TAPBP	TAP binding protein (tapasin)	NM_003190	881	1080	NM_003190-881-1080-+
9810	RNF40	ring finger protein 40, E3 ubiquitin protein ligase	NM_014771	2731	2880	NM_014771-2731-2880-+
6941	TCF19	transcription factor 19	NM_007109_2	581	809	NM_007109_2-581-809-+
6628	SNRPB	small nuclear ribonucleoprotein polypeptides B and B1	NM_003091	70	250	NM_003091-70-250-+
54331	GNG2	guanine nucleotide binding protein (G protein), gamma 2	NM_053064	731	1082	NM_053064-731-1082-+
9415	FADS2	fatty acid desaturase 2	NM_004265	101	440	NM_004265-101-440-+
79590	MRPL24	mitochondrial ribosomal protein L24	NM_145729	751	920	NM_145729-751-920-+
64318	NOC3L	nucleolar complex associated 3 homolog (S. cerevisiae)	NM_022451	98	404	NM_022451-98-404-+
80007	C10orf88	chromosome 10 open reading frame 88	NM_024942	1431	1610	NM_024942-1431-1610-+
830	CAPZA2	capping protein (actin filament) muscle Z-line, alpha 2	NM_006136	811	1110	NM_006136-811-1110-+
23013	SPEN	spen family transcriptional repressor	NM_015001	3281	3530	NM_015001-3281-3530-+
79567	FAM65A	family with sequence similarity 65, member A	NM_001193523	1581	2620	NM_001193523-1581-2620-+
9929	JOSD1	Josephin domain containing 1	NM_014876	2811	3010	NM_014876-2811-3010-+
64151	NCAPG	non-SMC condensin I complex, subunit G	NM_022346	1681	1929	NM_022346-1681-1929-+
4609	MYC	v-myc avian myelocytomatosis viral oncogene homolog	NM_002467	1731	2038	NM_002467-1731-2038-+
9877	ZC3H11A	zinc finger CCCH-type containing 11A	NM_014827	4211	4551	NM_014827-4211-4551-+
28957	MRPS28	mitochondrial ribosomal protein S28	NM_014018	491	670	NM_014018-491-670-+
8729	GBF1	golgi brefeldin A resistant guanine nucleotide exchange factor 1	NM_004193	2271	2440	NM_004193-2271-2440-+
23019	CNOT1	CCR4-NOT transcription complex, subunit 1	NM_016284	2961	3230	NM_016284-2961-3230-+
64318	NOC3L	nucleolar complex associated 3 homolog (S. cerevisiae)	NM_022451	651	777	NM_022451-651-777-+
4898	NRD1	nardilysin (N-arginine dibasic convertase)	NM_002525	3871	4007	NM_002525-3871-4007-+
7411	VBP1	von Hippel-Lindau binding protein 1	NM_003372	42	373	NM_003372-42-373-+
23175	LPIN1	lipin 1	NM_001261428	561	760	NM_001261428-561-760-+
1198	CLK3	CDC-like kinase 3	NM_001130028	2374	2563	NM_001130028-2374-2563-+
5905	RANGAP1	Ran GTPase activating protein 1	NM_001278651	3101	3270	NM_001278651-3101-3270-+
29066	ZC3H7A	zinc finger CCCH-type containing 7A	NM_014153	2901	3443	NM_014153-2901-3443-+
170384	FUT11	fucosyltransferase 11 (alpha (1,3) fucosyltransferase)	NM_001284194	1631	1760	NM_001284194-1631-1760-+
5033	P4HA1	prolyl 4-hydroxylase, alpha polypeptide I	NM_001142595	1047	1270	NM_001142595-1047-1270-+
4839	NOP2	NOP2 nucleolar protein	NM_001258310	2341	2800	NM_001258310-2341-2800-+
79888	LPCAT1	lysophosphatidylcholine acyltransferase 1	NM_024830_2	1601	1950	NM_024830_2-1601-1950-+
10567	RABAC1	Rab acceptor 1 (prenylated)	NM_006423	671	800	NM_006423-671-800-+
11130	ZWINT	ZW10 interacting kinetochore protein	NM_032997	1241	1340	NM_032997-1241-1340-+
9967	THRAP3	thyroid hormone receptor associated protein 3	NM_005119	2937	3319	NM_005119-2937-3319-+
375790	AGRN	agrin	NM_198576	6184	6942	NM_198576-6184-6942-+
55148	UBR7	ubiquitin protein ligase E3 component n-recognin 7 (putative)	NM_175748	921	1060	NM_175748-921-1060-+
11322	TMC6	transmembrane channel-like 6	NM_001127198	291	470	NM_001127198-291-470-+
80709	AKNA	AT-hook transcription factor	NM_030767	541	970	NM_030767-541-970-+
57205	ATP10D	ATPase, class V, type 10D	NM_020453	4073	4658	NM_020453-4073-4658-+
6257	RXRB	retinoid X receptor, beta	NM_001270401_2	2361	2540	NM_001270401_2-2361-2540-+
23180	RFTN1	raftlin, lipid raft linker 1	NM_015150	891	1100	NM_015150-891-1100-+
2101	ESRRA	estrogen-related receptor alpha	NM_001282450	1461	1610	NM_001282450-1461-1610-+
4200	ME2	malic enzyme 2, NAD(+)-dependent, mitochondrial	NM_002396	351	510	NM_002396-351-510-+
3646	EIF3E	eukaryotic translation initiation factor 3, subunit E	NM_001568	1251	1463	NM_001568-1251-1463-+
64965	MRPS9	mitochondrial ribosomal protein S9	NM_182640	831	990	NM_182640-831-990-+
5209	PFKFB3	6-phosphofructo-2-kinase/fructose-2,6-biphosphatase 3	NM_004566	2291	2800	NM_004566-2291-2800-+
6830	SUPT6H	suppressor of Ty 6 homolog (S. cerevisiae)	NM_003170	111	300	NM_003170-111-300-+
11108	PRDM4	PR domain containing 4	NM_012406	921	1240	NM_012406-921-1240-+
27436	EML4	echinoderm microtubule associated protein like 4	NM_019063	2795	3217	NM_019063-2795-3217-+
54555	DDX49	DEAD (Asp-Glu-Ala-Asp) box polypeptide 49	NM_019070	1221	1457	NM_019070-1221-1457-+
10241	CALCOCO2	calcium binding and coiled-coil domain 2	NM_001261390	551	1225	NM_001261390-551-1225-+
9406	ZRANB2	zinc finger, RAN-binding domain containing 2	NM_005455	1201	1453	NM_005455-1201-1453-+
83641	FAM107B	family with sequence similarity 107, member B	NM_001282695	806	1588	NM_001282695-806-1588-+
157313	CDCA2	cell division cycle associated 2	NM_152562	3481	3643	NM_152562-3481-3643-+
3916	LAMP1	lysosomal-associated membrane protein 1	NM_005561	801	990	NM_005561-801-990-+
9777	TM9SF4	transmembrane 9 superfamily protein member 4	NM_014742	2072	2380	NM_014742-2072-2380-+
2956	MSH6	mutS homolog 6	NM_000179	741	1090	NM_000179-741-1090-+
4301	MLLT4	myeloid/lymphoid or mixed-lineage leukemia (trithorax homolog, Drosophila); translocated to, 4	NM_001291964	4351	4610	NM_001291964-4351-4610-+
3065	HDAC1	histone deacetylase 1	NM_004964	1321	1567	NM_004964-1321-1567-+
2820	GPD2	glycerol-3-phosphate dehydrogenase 2 (mitochondrial)	NM_001083112	2398	2654	NM_001083112-2398-2654-+
54625	PARP14	poly (ADP-ribose) polymerase family, member 14	NM_017554	1181	1380	NM_017554-1181-1380-+
3157	HMGCS1	3-hydroxy-3-methylglutaryl-CoA synthase 1 (soluble)	NM_001098272	1671	1811	NM_001098272-1671-1811-+
5326	PLAGL2	pleiomorphic adenoma gene-like 2	NM_002657	821	950	NM_002657-821-950-+
9885	OSBPL2	oxysterol binding protein-like 2	NM_144498	1551	1933	NM_144498-1551-1933-+
51465	UBE2J1	ubiquitin-conjugating enzyme E2, J1	NM_016021	931	1260	NM_016021-931-1260-+
55717	WDR11	WD repeat domain 11	NM_018117	2445	2700	NM_018117-2445-2700-+
83737	ITCH	itchy E3 ubiquitin protein ligase	NM_001257137	2761	3090	NM_001257137-2761-3090-+
116113	FOXP4	forkhead box P4	NM_001012426	2311	2530	NM_001012426-2311-2530-+
57621	ZBTB2	zinc finger and BTB domain containing 2	NM_020861	1331	1900	NM_020861-1331-1900-+
6464	SHC1	SHC (Src homology 2 domain containing) transforming protein 1	NM_001130040	454	610	NM_001130040-454-610-+
9581	PREPL	prolyl endopeptidase-like	NM_006036	1081	1270	NM_006036-1081-1270-+
85464	SSH2	slingshot protein phosphatase 2	NM_001282129	2581	2910	NM_001282129-2581-2910-+
8775	NAPA	N-ethylmaleimide-sensitive factor attachment protein, alpha	NM_003827	1731	1850	NM_003827-1731-1850-+
4677	NARS	asparaginyl-tRNA synthetase	NM_004539	311	692	NM_004539-311-692-+
55095	SAMD4B	sterile alpha motif domain containing 4B	NM_018028	1561	1800	NM_018028-1561-1800-+
10943	MSL3	male-specific lethal 3 homolog (Drosophila)	NM_078628	421	719	NM_078628-421-719-+
9282	MED14	mediator complex subunit 14	NM_004229	3111	3270	NM_004229-3111-3270-+
10075	HUWE1	HECT, UBA and WWE domain containing 1, E3 ubiquitin protein ligase	NM_031407	10071	10380	NM_031407-10071-10380-+
5108	PCM1	pericentriolar material 1	NM_006197	2551	2706	NM_006197-2551-2706-+
8703	B4GALT3	UDP-Gal:betaGlcNAc beta 1,4- galactosyltransferase, polypeptide 3	NM_001199873	1901	2090	NM_001199873-1901-2090-+
84971	ATG4D	autophagy related 4D, cysteine peptidase	NM_001281504	1611	1710	NM_001281504-1611-1710-+
4733	DRG1	developmentally regulated GTP binding protein 1	NM_004147	60	200	NM_004147-60-200-+
100287932	TIMM23	translocase of inner mitochondrial membrane 23 homolog (yeast)	NM_006327	1071	1220	NM_006327-1071-1220-+
57713	SFMBT2	Scm-like with four mbt domains 2	NM_001029880	2571	2720	NM_001029880-2571-2720-+
26065	LSM14A	LSM14A, SCD6 homolog A (S. cerevisiae)	NM_001114093_2	1391	1567	NM_001114093_2-1391-1567-+
819	CAMLG	calcium modulating ligand	NM_001745	321	710	NM_001745-321-710-+
329	BIRC2	baculoviral IAP repeat containing 2	NM_001256163	2231	2560	NM_001256163-2231-2560-+
122704	MRPL52	mitochondrial ribosomal protein L52	NM_181304	401	556	NM_181304-401-556-+
9640	ZNF592	zinc finger protein 592	NM_014630	3801	4264	NM_014630-3801-4264-+
55661	DDX27	DEAD (Asp-Glu-Ala-Asp) box polypeptide 27	NM_017895	1841	2270	NM_017895-1841-2270-+
10385	BTN2A2	butyrophilin, subfamily 2, member A2	NM_001197237	1211	1440	NM_001197237-1211-1440-+
5925	RB1	retinoblastoma 1	NM_000321	2511	3040	NM_000321-2511-3040-+
9774	BCLAF1	BCL2-associated transcription factor 1	NM_014739	2145	2489	NM_014739-2145-2489-+
79158	GNPTAB	N-acetylglucosamine-1-phosphate transferase, alpha and beta subunits	NM_024312	1941	2920	NM_024312-1941-2920-+
2799	GNS	glucosamine (N-acetyl)-6-sulfatase	NM_002076	1907	2130	NM_002076-1907-2130-+
3842	TNPO1	transportin 1	NM_002270	1461	1700	NM_002270-1461-1700-+
23392	KIAA0368	KIAA0368	NM_001080398	1321	1500	NM_001080398-1321-1500-+
23038	WDTC1	WD and tetratricopeptide repeats 1	NM_001276252	2671	2940	NM_001276252-2671-2940-+
81875	ISG20L2	interferon stimulated exonuclease gene 20kDa-like 2	NM_030980	691	880	NM_030980-691-880-+
8085	KMT2D	lysine (K)-specific methyltransferase 2D	NM_003482	9001	9279	NM_003482-9001-9279-+
9958	USP15	ubiquitin specific peptidase 15	NM_001252078	591	761	NM_001252078-591-761-+
6897	TARS	threonyl-tRNA synthetase	NM_001258438	2541	2700	NM_001258438-2541-2700-+
64324	NSD1	nuclear receptor binding SET domain protein 1	NM_022455	7951	8290	NM_022455-7951-8290-+
283130	SLC25A45	solute carrier family 25, member 45	NM_001278251	1598	1849	NM_001278251-1598-1849-+
51400	PPME1	protein phosphatase methylesterase 1	NM_001271593	2591	2750	NM_001271593-2591-2750-+
5824	PEX19	peroxisomal biogenesis factor 19	NM_002857	401	580	NM_002857-401-580-+
57169	ZNFX1	zinc finger, NFX1-type containing 1	NM_021035	1751	1960	NM_021035-1751-1960-+
29098	RANGRF	RAN guanine nucleotide release factor	NM_001177802	961	1136	NM_001177802-961-1136-+
55661	DDX27	DEAD (Asp-Glu-Ala-Asp) box polypeptide 27	NM_017895	321	701	NM_017895-321-701-+
57459	GATAD2B	GATA zinc finger domain containing 2B	NM_020699	321	662	NM_020699-321-662-+
10322	SMYD5	SMYD family member 5	NM_006062	1134	1380	NM_006062-1134-1380-+
25813	SAMM50	SAMM50 sorting and assembly machinery component	NM_015380	123	333	NM_015380-123-333-+
5900	RALGDS	ral guanine nucleotide dissociation stimulator	NM_006266	2631	3220	NM_006266-2631-3220-+
1017	CDK2	cyclin-dependent kinase 2	NM_001798	1121	1380	NM_001798-1121-1380-+
6794	STK11	serine/threonine kinase 11	NM_000455	711	1160	NM_000455-711-1160-+
9774	BCLAF1	BCL2-associated transcription factor 1	NM_014739	1207	1850	NM_014739-1207-1850-+
55183	RIF1	replication timing regulatory factor 1	NM_001177665	6351	6940	NM_001177665-6351-6940-+
29028	ATAD2	ATPase family, AAA domain containing 2	NM_014109	2191	2360	NM_014109-2191-2360-+
2969	GTF2I	general transcription factor IIi	NM_032999	3507	3715	NM_032999-3507-3715-+
2033	EP300	E1A binding protein p300	NM_001429	5801	6400	NM_001429-5801-6400-+
79726	WDR59	WD repeat domain 59	NM_030581	3331	3597	NM_030581-3331-3597-+
152137	CCDC50	coiled-coil domain containing 50	NM_178335	1526	1910	NM_178335-1526-1910-+
79091	METTL22	methyltransferase like 22	NM_024109	481	798	NM_024109-481-798-+
55074	OXR1	oxidation resistance 1	NM_001198533	1176	1995	NM_001198533-1176-1995-+
90861	HN1L	hematological and neurological expressed 1-like	NM_144570	401	867	NM_144570-401-867-+
6416	MAP2K4	mitogen-activated protein kinase kinase 4	NM_001281435	1231	1850	NM_001281435-1231-1850-+
9820	CUL7	cullin 7	NM_001168370	301	620	NM_001168370-301-620-+
65125	WNK1	WNK lysine deficient protein kinase 1	NM_001184985	7128	7500	NM_001184985-7128-7500-+
51547	SIRT7	sirtuin 7	NM_016538	1211	1440	NM_016538-1211-1440-+
10227	MFSD10	major facilitator superfamily domain containing 10	NM_001120	1061	1190	NM_001120-1061-1190-+
5868	RAB5A	RAB5A, member RAS oncogene family	NM_004162	1091	1230	NM_004162-1091-1230-+
8761	PABPC4	poly(A) binding protein, cytoplasmic 4 (inducible form)	NM_001135653	1545	1825	NM_001135653-1545-1825-+
8085	KMT2D	lysine (K)-specific methyltransferase 2D	NM_003482	9451	9710	NM_003482-9451-9710-+
55069	TMEM248	transmembrane protein 248	NM_017994	1131	1540	NM_017994-1131-1540-+
5965	RECQL	RecQ helicase-like	NM_002907	551	742	NM_002907-551-742-+
8202	NCOA3	nuclear receptor coactivator 3	NM_181659	3486	3730	NM_181659-3486-3730-+
26528	DAZAP1	DAZ associated protein 1	NM_170711	1551	1650	NM_170711-1551-1650-+
116841	SNAP47	synaptosomal-associated protein, 47kDa	NM_053052	2003	2200	NM_053052-2003-2200-+
5253	PHF2	PHD finger protein 2	NM_005392	3571	3740	NM_005392-3571-3740-+
10600	USP16	ubiquitin specific peptidase 16	NM_001032410	1471	1670	NM_001032410-1471-1670-+
23030	KDM4B	lysine (K)-specific demethylase 4B	NM_015015	172	410	NM_015015-172-410-+
6655	SOS2	son of sevenless homolog 2 (Drosophila)	NM_006939	3631	4102	NM_006939-3631-4102-+
813	CALU	calumenin	NM_001199672	1411	2168	NM_001199672-1411-2168-+
23438	HARS2	histidyl-tRNA synthetase 2, mitochondrial	NM_012208	1767	2080	NM_012208-1767-2080-+
9950	GOLGA5	golgin A5	NM_005113	311	540	NM_005113-311-540-+
55974	SLC50A1	solute carrier family 50 (sugar efflux transporter), member 1	NM_001287591	831	1060	NM_001287591-831-1060-+
2618	GART	phosphoribosylglycinamide formyltransferase, phosphoribosylglycinamide synthetase, phosphoribosylaminoimidazole synthetase	NM_001136005_2	2501	2730	NM_001136005_2-2501-2730-+
22930	RAB3GAP1	RAB3 GTPase activating protein subunit 1 (catalytic)	NM_001172435	1582	1979	NM_001172435-1582-1979-+
58513	EPS15L1	epidermal growth factor receptor pathway substrate 15-like 1	NM_001258376	661	870	NM_001258376-661-870-+
9044	BTAF1	BTAF1 RNA polymerase II, B-TFIID transcription factor-associated, 170kDa	NM_003972	5411	5730	NM_003972-5411-5730-+
26228	STAP1	signal transducing adaptor family member 1	NM_012108	411	620	NM_012108-411-620-+
56259	CTNNBL1	catenin, beta like 1	NM_001281495	351	574	NM_001281495-351-574-+
31	ACACA	acetyl-CoA carboxylase alpha	NM_198839	9851	10020	NM_198839-9851-10020-+
4077	NBR1	neighbor of BRCA1 gene 1	NM_005899	3171	3370	NM_005899-3171-3370-+
56829	ZC3HAV1	zinc finger CCCH-type, antiviral 1	NM_020119	1361	1830	NM_020119-1361-1830-+
22893	BAHD1	bromo adjacent homology domain containing 1	NM_001301132	1191	1340	NM_001301132-1191-1340-+
51400	PPME1	protein phosphatase methylesterase 1	NM_001271593	1061	1196	NM_001271593-1061-1196-+
11079	RER1	retention in endoplasmic reticulum sorting receptor 1	NM_007033	741	1070	NM_007033-741-1070-+
8405	SPOP	speckle-type POZ protein	NM_001007226	1586	2025	NM_001007226-1586-2025-+
23064	SETX	senataxin	NM_015046	7481	7930	NM_015046-7481-7930-+
54541	DDIT4	DNA-damage-inducible transcript 4	NM_019058	843	1090	NM_019058-843-1090-+
5903	RANBP2	RAN binding protein 2	NM_006267	6085	6300	NM_006267-6085-6300-+
9958	USP15	ubiquitin specific peptidase 15	NM_001252078	2831	3187	NM_001252078-2831-3187-+
6257	RXRB	retinoid X receptor, beta	NM_001270401_2	2071	2310	NM_001270401_2-2071-2310-+
10980	COPS6	COP9 signalosome subunit 6	NM_006833	918	1135	NM_006833-918-1135-+
26058	GIGYF2	GRB10 interacting GYF protein 2	NM_015575	4631	4840	NM_015575-4631-4840-+
23162	MAPK8IP3	mitogen-activated protein kinase 8 interacting protein 3	NM_015133	5151	5550	NM_015133-5151-5550-+
170506	DHX36	DEAH (Asp-Glu-Ala-His) box polypeptide 36	NM_020865_2	2911	3259	NM_020865_2-2911-3259-+
84656	GLYR1	glyoxylate reductase 1 homolog (Arabidopsis)	NM_032569	1751	1960	NM_032569-1751-1960-+
51611	DPH5	diphthamide biosynthesis 5	NM_001077394	741	954	NM_001077394-741-954-+
933	CD22	CD22 molecule	NM_001771	2521	2690	NM_001771-2521-2690-+
51202	DDX47	DEAD (Asp-Glu-Ala-Asp) box polypeptide 47	NM_016355	1221	1466	NM_016355-1221-1466-+
29101	SSU72	SSU72 RNA polymerase II CTD phosphatase homolog (S. cerevisiae)	NM_014188	461	680	NM_014188-461-680-+
23304	UBR2	ubiquitin protein ligase E3 component n-recognin 2	NM_015255	5402	5599	NM_015255-5402-5599-+
10620	ARID3B	AT rich interactive domain 3B (BRIGHT-like)	NM_006465	370	750	NM_006465-370-750-+
6670	SP3	Sp3 transcription factor	NM_003111	1131	1630	NM_003111-1131-1630-+
23389	MED13L	mediator complex subunit 13-like	NM_015335	6661	7013	NM_015335-6661-7013-+
9589	WTAP	Wilms tumor 1 associated protein	NM_004906	1111	1530	NM_004906-1111-1530-+
1387	CREBBP	CREB binding protein	NM_004380	3191	3460	NM_004380-3191-3460-+
25988	HINFP	histone H4 transcription factor	NM_015517	2171	2340	NM_015517-2171-2340-+
25930	PTPN23	protein tyrosine phosphatase, non-receptor type 23	NM_015466	4701	5100	NM_015466-4701-5100-+
1660	DHX9	DEAH (Asp-Glu-Ala-His) box helicase 9	NM_001357	3801	4030	NM_001357-3801-4030-+
3840	KPNA4	karyopherin alpha 4 (importin alpha 3)	NM_002268	311	490	NM_002268-311-490-+
57610	RANBP10	RAN binding protein 10	NM_020850	3141	3610	NM_020850-3141-3610-+
814	CAMK4	calcium/calmodulin-dependent protein kinase IV	NM_001744	1291	1773	NM_001744-1291-1773-+
24144	TFIP11	tuftelin interacting protein 11	NM_001008697	2511	2908	NM_001008697-2511-2908-+
6217	RPS16	ribosomal protein S16	NM_001020	491	590	NM_001020-491-590-+
200424	TET3	tet methylcytosine dioxygenase 3	NM_001287491	4041	4470	NM_001287491-4041-4470-+
254065	BRWD3	bromodomain and WD repeat domain containing 3	NM_153252	4551	4680	NM_153252-4551-4680-+
2931	GSK3A	glycogen synthase kinase 3 alpha	NM_019884	1801	2170	NM_019884-1801-2170-+
5777	PTPN6	protein tyrosine phosphatase, non-receptor type 6	NM_080549	2025	2200	NM_080549-2025-2200-+
5689	PSMB1	proteasome (prosome, macropain) subunit, beta type, 1	NM_002793	741	902	NM_002793-741-902-+
25897	RNF19A	ring finger protein 19A, RBR E3 ubiquitin protein ligase	NM_183419	2321	2660	NM_183419-2321-2660-+
50488	MINK1	misshapen-like kinase 1	NM_153827	4881	5010	NM_153827-4881-5010-+
9820	CUL7	cullin 7	NM_001168370	751	950	NM_001168370-751-950-+
892	CCNC	cyclin C	NM_005190	971	1229	NM_005190-971-1229-+
10121	ACTR1A	ARP1 actin-related protein 1 homolog A, centractin alpha (yeast)	NM_005736	2771	2870	NM_005736-2771-2870-+
127933	UHMK1	U2AF homology motif (UHM) kinase 1	NM_175866	1133	1580	NM_175866-1133-1580-+
125488	TTC39C	tetratricopeptide repeat domain 39C	NM_001135993	2171	2410	NM_001135993-2171-2410-+
22950	SLC4A1AP	solute carrier family 4 (anion exchanger), member 1, adaptor protein	NM_018158	2148	2540	NM_018158-2148-2540-+
23211	ZC3H4	zinc finger CCCH-type containing 4	NM_015168	3401	3760	NM_015168-3401-3760-+
10905	MAN1A2	mannosidase, alpha, class 1A, member 2	NM_006699	2591	2940	NM_006699-2591-2940-+
5252	PHF1	PHD finger protein 1	NM_024165	1651	1820	NM_024165-1651-1820-+
10541	ANP32B	acidic (leucine-rich) nuclear phosphoprotein 32 family, member B	NM_006401	811	1217	NM_006401-811-1217-+
51650	MRPS33	mitochondrial ribosomal protein S33	NM_016071	401	510	NM_016071-401-510-+
10146	G3BP1	GTPase activating protein (SH3 domain) binding protein 1	NM_005754	1401	1628	NM_005754-1401-1628-+
4084	MXD1	MAX dimerization protein 1	NM_002357	2411	2620	NM_002357-2411-2620-+
5533	PPP3CC	protein phosphatase 3, catalytic subunit, gamma isozyme	NM_001243974	541	700	NM_001243974-541-700-+
9170	LPAR2	lysophosphatidic acid receptor 2	NM_004720	1491	1753	NM_004720-1491-1753-+
9320	TRIP12	thyroid hormone receptor interactor 12	NM_001284214	881	1260	NM_001284214-881-1260-+
2033	EP300	E1A binding protein p300	NM_001429	501	620	NM_001429-501-620-+
6746	SSR2	signal sequence receptor, beta (translocon-associated protein beta)	NM_003145	881	1120	NM_003145-881-1120-+
116138	KLHDC3	kelch domain containing 3	NM_057161	1701	1965	NM_057161-1701-1965-+
9159	PCSK7	proprotein convertase subtilisin/kexin type 7	NM_004716	2781	3080	NM_004716-2781-3080-+
259230	SGMS1	sphingomyelin synthase 1	NM_147156	691	1580	NM_147156-691-1580-+
91746	YTHDC1	YTH domain containing 1	NM_001031732	951	1050	NM_001031732-951-1050-+
23586	DDX58	DEAD (Asp-Glu-Ala-Asp) box polypeptide 58	NM_014314	2681	3009	NM_014314-2681-3009-+
57403	RAB22A	RAB22A, member RAS oncogene family	NM_020673	791	1180	NM_020673-791-1180-+
55632	G2E3	G2/M-phase specific E3 ubiquitin protein ligase	NM_017769	1111	1290	NM_017769-1111-1290-+
51322	WAC	WW domain containing adaptor with coiled-coil	NM_100264	811	1250	NM_100264-811-1250-+
150275	CCDC117	coiled-coil domain containing 117	NM_173510	743	1210	NM_173510-743-1210-+
1612	DAPK1	death-associated protein kinase 1	NM_004938	571	770	NM_004938-571-770-+
51187	RSL24D1	ribosomal L24 domain containing 1	NM_016304	316	680	NM_016304-316-680-+
23062	GGA2	golgi-associated, gamma adaptin ear containing, ARF binding protein 2	NM_015044	531	910	NM_015044-531-910-+
5432	POLR2C	polymerase (RNA) II (DNA directed) polypeptide C, 33kDa	NM_032940	1641	1796	NM_032940-1641-1796-+
6464	SHC1	SHC (Src homology 2 domain containing) transforming protein 1	NM_001130040	1891	2090	NM_001130040-1891-2090-+
8031	NCOA4	nuclear receptor coactivator 4	NM_001145260	1254	1884	NM_001145260-1254-1884-+
8729	GBF1	golgi brefeldin A resistant guanine nucleotide exchange factor 1	NM_004193	5711	5950	NM_004193-5711-5950-+
9746	CLSTN3	calsyntenin 3	NM_014718	3051	3351	NM_014718-3051-3351-+
9937	DCLRE1A	DNA cross-link repair 1A	NM_014881	1061	1340	NM_014881-1061-1340-+
5621	PRNP	prion protein	NM_000311	461	1010	NM_000311-461-1010-+
25972	UNC50	unc-50 homolog (C. elegans)	NM_014044	181	378	NM_014044-181-378-+
84681	HINT2	histidine triad nucleotide binding protein 2	NM_032593	551	650	NM_032593-551-650-+
55704	CCDC88A	coiled-coil domain containing 88A	NM_001135597	3021	3530	NM_001135597-3021-3530-+
196528	ARID2	AT rich interactive domain 2 (ARID, RFX-like)	NM_152641	3326	4450	NM_152641-3326-4450-+
23033	DOPEY1	dopey family member 1	NM_001199942	7341	7745	NM_001199942-7341-7745-+
2982	GUCY1A3	guanylate cyclase 1, soluble, alpha 3	NM_000856	2401	2580	NM_000856-2401-2580-+
4261	CIITA	class II, major histocompatibility complex, transactivator	NM_001286402	3741	3913	NM_001286402-3741-3913-+
1616	DAXX	death-domain associated protein	NM_001141969_5	861	1021	NM_001141969_5-861-1021-+
84193	SETD3	SET domain containing 3	NM_032233	1526	2024	NM_032233-1526-2024-+
8576	STK16	serine/threonine kinase 16	NM_001008910	1111	1267	NM_001008910-1111-1267-+
573	BAG1	BCL2-associated athanogene	NM_001172415	331	530	NM_001172415-331-530-+
92799	SHKBP1	SH3KBP1 binding protein 1	NM_138392	2061	2220	NM_138392-2061-2220-+
10120	ACTR1B	ARP1 actin-related protein 1 homolog B, centractin beta (yeast)	NM_005735	2111	2228	NM_005735-2111-2228-+
3394	IRF8	interferon regulatory factor 8	NM_002163	22	160	NM_002163-22-160-+
2186	BPTF	bromodomain PHD finger transcription factor	NM_182641	1271	1390	NM_182641-1271-1390-+
22907	DHX30	DEAH (Asp-Glu-Ala-His) box helicase 30	NM_014966	1591	1890	NM_014966-1591-1890-+
5432	POLR2C	polymerase (RNA) II (DNA directed) polypeptide C, 33kDa	NM_032940	631	820	NM_032940-631-820-+
23326	USP22	ubiquitin specific peptidase 22	NM_015276	1922	2380	NM_015276-1922-2380-+
3631	INPP4A	inositol polyphosphate-4-phosphatase, type I, 107kDa	NM_001134224	1871	2030	NM_001134224-1871-2030-+
5511	PPP1R8	protein phosphatase 1, regulatory subunit 8	NM_138558	1031	1417	NM_138558-1031-1417-+
114881	OSBPL7	oxysterol binding protein-like 7	NM_145798	2471	2730	NM_145798-2471-2730-+
9382	COG1	component of oligomeric golgi complex 1	NM_018714	1571	1830	NM_018714-1571-1830-+
26133	TRPC4AP	transient receptor potential cation channel, subfamily C, member 4 associated protein	NM_015638	2301	2540	NM_015638-2301-2540-+
103	ADAR	adenosine deaminase, RNA-specific	NM_001193495	1177	1780	NM_001193495-1177-1780-+
55226	NAT10	N-acetyltransferase 10 (GCN5-related)	NM_024662	461	560	NM_024662-461-560-+
5250	SLC25A3	solute carrier family 25 (mitochondrial carrier; phosphate carrier), member 3	NM_213611	1311	1586	NM_213611-1311-1586-+
5583	PRKCH	protein kinase C, eta	NM_006255	2561	3370	NM_006255-2561-3370-+
7988	ZNF212	zinc finger protein 212	NM_012256	901	1090	NM_012256-901-1090-+
6670	SP3	Sp3 transcription factor	NM_003111	2641	2878	NM_003111-2641-2878-+
378	ARF4	ADP-ribosylation factor 4	NM_001660	791	920	NM_001660-791-920-+
6832	SUPV3L1	suppressor of var1, 3-like 1 (S. cerevisiae)	NM_001301683	2281	2584	NM_001301683-2281-2584-+
9885	OSBPL2	oxysterol binding protein-like 2	NM_144498	2001	2216	NM_144498-2001-2216-+
51780	KDM3B	lysine (K)-specific demethylase 3B	NM_016604	1656	1930	NM_016604-1656-1930-+
5510	PPP1R7	protein phosphatase 1, regulatory subunit 7	NM_002712	833	1132	NM_002712-833-1132-+
27000	DNAJC2	DnaJ (Hsp40) homolog, subfamily C, member 2	NM_014377	961	1320	NM_014377-961-1320-+
6733	SRPK2	SRSF protein kinase 2	NM_182691	2252	2470	NM_182691-2252-2470-+
51056	LAP3	leucine aminopeptidase 3	NM_015907	1571	1710	NM_015907-1571-1710-+
8895	CPNE3	copine III	NM_003909	811	1050	NM_003909-811-1050-+
80155	NAA15	N(alpha)-acetyltransferase 15, NatA auxiliary subunit	NM_057175	2711	3009	NM_057175-2711-3009-+
81704	DOCK8	dedicator of cytokinesis 8	NM_203447	6181	6740	NM_203447-6181-6740-+
219333	USP12	ubiquitin specific peptidase 12	NM_182488	3668	3920	NM_182488-3668-3920-+
9733	SART3	squamous cell carcinoma antigen recognized by T cells 3	NM_014706	411	550	NM_014706-411-550-+
23264	ZC3H7B	zinc finger CCCH-type containing 7B	NM_017590	3141	3240	NM_017590-3141-3240-+
10270	AKAP8	A kinase (PRKA) anchor protein 8	NM_005858	1841	1940	NM_005858-1841-1940-+
23198	PSME4	proteasome (prosome, macropain) activator subunit 4	NM_014614	5774	6272	NM_014614-5774-6272-+
60560	NAA35	N(alpha)-acetyltransferase 35, NatC auxiliary subunit	NM_024635	1781	1920	NM_024635-1781-1920-+
11047	ADRM1	adhesion regulating molecule 1	NM_007002	1291	1410	NM_007002-1291-1410-+
7511	XPNPEP1	X-prolyl aminopeptidase (aminopeptidase P) 1, soluble	NM_020383	2311	2530	NM_020383-2311-2530-+
80824	DUSP16	dual specificity phosphatase 16	NM_030640	1601	1860	NM_030640-1601-1860-+
51528	JKAMP	JNK1/MAPK8-associated membrane protein	NM_001284201	1451	1738	NM_001284201-1451-1738-+
2534	FYN	FYN proto-oncogene, Src family tyrosine kinase	NM_002037	2231	2560	NM_002037-2231-2560-+
550	AUP1	ancient ubiquitous protein 1	NM_181575	1301	1590	NM_181575-1301-1590-+
51631	LUC7L2	LUC7-like 2 (S. cerevisiae)	NM_001270643	1121	1360	NM_001270643-1121-1360-+
1108	CHD4	chromodomain helicase DNA binding protein 4	NM_001273	4051	4210	NM_001273-4051-4210-+
1435	CSF1	colony stimulating factor 1 (macrophage)	NM_000757	2251	2670	NM_000757-2251-2670-+
8481	OFD1	oral-facial-digital syndrome 1	NM_003611	2281	2530	NM_003611-2281-2530-+
80179	MYO19	myosin XIX	NM_001163735	3871	4090	NM_001163735-3871-4090-+
55030	FBXO34	F-box protein 34	NM_017943	1351	1490	NM_017943-1351-1490-+
56987	BBX	bobby sox homolog (Drosophila)	NM_001142568	1901	2400	NM_001142568-1901-2400-+
6627	SNRPA1	small nuclear ribonucleoprotein polypeptide A'	NM_003090	38	217	NM_003090-38-217-+
10955	SERINC3	serine incorporator 3	NM_006811	1431	1770	NM_006811-1431-1770-+
10385	BTN2A2	butyrophilin, subfamily 2, member A2	NM_001197237	2251	2430	NM_001197237-2251-2430-+
23063	WAPAL	wings apart-like homolog (Drosophila)	NM_015045	431	660	NM_015045-431-660-+
7323	UBE2D3	ubiquitin-conjugating enzyme E2D 3	NM_181892	1093	1530	NM_181892-1093-1530-+
81627	TRMT1L	tRNA methyltransferase 1 homolog (S. cerevisiae)-like	NM_030934	2051	2460	NM_030934-2051-2460-+
9878	TOX4	TOX high mobility group box family member 4	NM_014828	2211	2349	NM_014828-2211-2349-+
267	AMFR	autocrine motility factor receptor, E3 ubiquitin protein ligase	NM_001144	2091	2500	NM_001144-2091-2500-+
7764	ZNF217	zinc finger protein 217	NM_006526	31	290	NM_006526-31-290-+
81887	LAS1L	LAS1-like (S. cerevisiae)	NM_031206	1771	2000	NM_031206-1771-2000-+
9887	SMG7	SMG7 nonsense mediated mRNA decay factor	NM_001174061	4801	5180	NM_001174061-4801-5180-+
9918	NCAPD2	non-SMC condensin I complex, subunit D2	NM_014865	3341	3500	NM_014865-3341-3500-+
3066	HDAC2	histone deacetylase 2	NM_001527	1507	1766	NM_001527-1507-1766-+
7342	UBP1	upstream binding protein 1 (LBP-1a)	NM_014517	2413	2738	NM_014517-2413-2738-+
55709	KBTBD4	kelch repeat and BTB (POZ) domain containing 4	NM_016506	991	1420	NM_016506-991-1420-+
23080	AVL9	AVL9 homolog (S. cerevisiase)	NM_015060	2091	2349	NM_015060-2091-2349-+
55754	TMEM30A	transmembrane protein 30A	NM_018247	1191	1430	NM_018247-1191-1430-+
3140	MR1	major histocompatibility complex, class I-related	NM_001531	1251	1830	NM_001531-1251-1830-+
4343	MOV10	Mov10 RISC complex RNA helicase	NM_001286072	4291	4488	NM_001286072-4291-4488-+
54948	MRPL16	mitochondrial ribosomal protein L16	NM_017840	703	1050	NM_017840-703-1050-+
23481	PES1	pescadillo ribosomal biogenesis factor 1	NM_001282328	1901	2330	NM_001282328-1901-2330-+
6515	SLC2A3	solute carrier family 2 (facilitated glucose transporter), member 3	NM_006931	2346	2519	NM_006931-2346-2519-+
5663	PSEN1	presenilin 1	NM_000021	381	530	NM_000021-381-530-+
9267	CYTH1	cytohesin 1	NM_001292018	521	880	NM_001292018-521-880-+
84265	POLR3GL	polymerase (RNA) III (DNA directed) polypeptide G (32kD)-like	NM_032305	521	810	NM_032305-521-810-+
23274	CLEC16A	C-type lectin domain family 16, member A	NM_015226	1351	1560	NM_015226-1351-1560-+
23384	SPECC1L	sperm antigen with calponin homology and coiled-coil domains 1-like	NM_015330	1531	1710	NM_015330-1531-1710-+
9652	TTC37	tetratricopeptide repeat domain 37	NM_014639	4851	5075	NM_014639-4851-5075-+
1063	CENPF	centromere protein F, 350/400kDa	NM_016343	9441	9570	NM_016343-9441-9570-+
23394	ADNP	activity-dependent neuroprotector homeobox	NM_001282531	3561	3995	NM_001282531-3561-3995-+
10081	PDCD7	programmed cell death 7	NM_005707	1086	1305	NM_005707-1086-1305-+
3978	LIG1	ligase I, DNA, ATP-dependent	NM_000234	851	1180	NM_000234-851-1180-+
25962	KIAA1429	KIAA1429	NM_015496	1231	1950	NM_015496-1231-1950-+
23352	UBR4	ubiquitin protein ligase E3 component n-recognin 4	NM_020765	6941	7090	NM_020765-6941-7090-+
8021	NUP214	nucleoporin 214kDa	NM_005085	4331	4590	NM_005085-4331-4590-+
80301	PLEKHO2	pleckstrin homology domain containing, family O member 2	NM_025201	771	1597	NM_025201-771-1597-+
5708	PSMD2	proteasome (prosome, macropain) 26S subunit, non-ATPase, 2	NM_002808	2831	3027	NM_002808-2831-3027-+
9978	RBX1	ring-box 1, E3 ubiquitin protein ligase	NM_014248	34	200	NM_014248-34-200-+
951	CD37	CD37 molecule	NM_001774	1091	1231	NM_001774-1091-1231-+
10939	AFG3L2	AFG3-like AAA ATPase 2	NM_006796	1931	2030	NM_006796-1931-2030-+
23223	RRP12	ribosomal RNA processing 12 homolog (S. cerevisiae)	NM_015179	3811	4030	NM_015179-3811-4030-+
5873	RAB27A	RAB27A, member RAS oncogene family	NM_004580	641	920	NM_004580-641-920-+
63892	THADA	thyroid adenoma associated	NM_001083953	6013	6280	NM_001083953-6013-6280-+
9031	BAZ1B	bromodomain adjacent to zinc finger domain, 1B	NM_032408	1881	2142	NM_032408-1881-2142-+
221037	JMJD1C	jumonji domain containing 1C	NM_032776	6341	6480	NM_032776-6341-6480-+
466	ATF1	activating transcription factor 1	NM_005171	911	1100	NM_005171-911-1100-+
5594	MAPK1	mitogen-activated protein kinase 1	NM_002745	371	750	NM_002745-371-750-+
114823	LENG8	leukocyte receptor cluster (LRC) member 8	NM_052925	3041	3220	NM_052925-3041-3220-+
10569	SLU7	SLU7 splicing factor homolog (S. cerevisiae)	NM_006425	79	380	NM_006425-79-380-+
6051	RNPEP	arginyl aminopeptidase (aminopeptidase B)	NM_020216	1401	1680	NM_020216-1401-1680-+
5066	PAM	peptidylglycine alpha-amidating monooxygenase	NM_000919	3081	3280	NM_000919-3081-3280-+
2268	FGR	FGR proto-oncogene, Src family tyrosine kinase	NM_001042747	2041	2310	NM_001042747-2041-2310-+
55601	DDX60	DEAD (Asp-Glu-Ala-Asp) box polypeptide 60	NM_017631	3727	4095	NM_017631-3727-4095-+
3099	HK2	hexokinase 2	NM_000189	5691	5970	NM_000189-5691-5970-+
102	ADAM10	ADAM metallopeptidase domain 10	NM_001110	2651	3101	NM_001110-2651-3101-+
25988	HINFP	histone H4 transcription factor	NM_015517	1491	1720	NM_015517-1491-1720-+
84061	MAGT1	magnesium transporter 1	NM_032121	147	480	NM_032121-147-480-+
23394	ADNP	activity-dependent neuroprotector homeobox	NM_001282531	751	900	NM_001282531-751-900-+
55683	KANSL3	KAT8 regulatory NSL complex subunit 3	NM_001115016	3601	3990	NM_001115016-3601-3990-+
23157	2015-09-06	septin 6	NM_145799	1231	1510	NM_145799-1231-1510-+
10318	TNIP1	TNFAIP3 interacting protein 1	NM_001252385	2251	2400	NM_001252385-2251-2400-+
57680	CHD8	chromodomain helicase DNA binding protein 8	NM_001170629	5861	6030	NM_001170629-5861-6030-+
51061	TXNDC11	thioredoxin domain containing 11	NM_015914	2711	2990	NM_015914-2711-2990-+
55201	MAP1S	microtubule-associated protein 1S	NM_018174	1381	1710	NM_018174-1381-1710-+
5885	RAD21	RAD21 homolog (S. pombe)	NM_006265	1751	2000	NM_006265-1751-2000-+
91010	FMNL3	formin-like 3	NM_175736	1521	1654	NM_175736-1521-1654-+
27071	DAPP1	dual adaptor of phosphotyrosine and 3-phosphoinositides	NM_014395	941	1210	NM_014395-941-1210-+
148479	PHF13	PHD finger protein 13	NM_153812	1171	1610	NM_153812-1171-1610-+
2030	SLC29A1	solute carrier family 29 (equilibrative nucleoside transporter), member 1	NM_001078177	2321	2429	NM_001078177-2321-2429-+
55023	PHIP	pleckstrin homology domain interacting protein	NM_017934	4915	5796	NM_017934-4915-5796-+
22870	PPP6R1	protein phosphatase 6, regulatory subunit 1	NM_014931	3101	3260	NM_014931-3101-3260-+
51203	NUSAP1	nucleolar and spindle associated protein 1	NM_016359	1391	1572	NM_016359-1391-1572-+
701	BUB1B	BUB1 mitotic checkpoint serine/threonine kinase B	NM_001211	161	340	NM_001211-161-340-+
3099	HK2	hexokinase 2	NM_000189	5001	5170	NM_000189-5001-5170-+
64682	ANAPC1	anaphase promoting complex subunit 1	NM_022662	6101	6252	NM_022662-6101-6252-+
26020	LRP10	low density lipoprotein receptor-related protein 10	NM_014045	1161	1370	NM_014045-1161-1370-+
6790	AURKA	aurora kinase A	NM_198433	841	1090	NM_198433-841-1090-+
55833	UBAP2	ubiquitin associated protein 2	NM_018449	2111	2310	NM_018449-2111-2310-+
27090	ST6GALNAC4	ST6 (alpha-N-acetyl-neuraminyl-2,3-beta-galactosyl-1,3)-N-acetylgalactosaminide alpha-2,6-sialyltransferase 4	NM_175039	1111	1361	NM_175039-1111-1361-+
25836	NIPBL	Nipped-B homolog (Drosophila)	NM_015384	2333	3568	NM_015384-2333-3568-+
11137	PWP1	PWP1 homolog (S. cerevisiae)	NM_007062	91	420	NM_007062-91-420-+
26100	WIPI2	WD repeat domain, phosphoinositide interacting 2	NM_001278299	1691	1961	NM_001278299-1691-1961-+
55577	NAGK	N-acetylglucosamine kinase	NM_017567	344	610	NM_017567-344-610-+
1660	DHX9	DEAH (Asp-Glu-Ala-His) box helicase 9	NM_001357	78	430	NM_001357-78-430-+
55291	PPP6R3	protein phosphatase 6, regulatory subunit 3	NM_001164160	2541	2720	NM_001164160-2541-2720-+
54832	VPS13C	vacuolar protein sorting 13 homolog C (S. cerevisiae)	NM_001018088	10511	10780	NM_001018088-10511-10780-+
57492	ARID1B	AT rich interactive domain 1B (SWI1-like)	NM_020732	6665	6847	NM_020732-6665-6847-+
55827	DCAF6	DDB1 and CUL4 associated factor 6	NM_001198956	2681	2780	NM_001198956-2681-2780-+
6605	SMARCE1	SWI/SNF related, matrix associated, actin dependent regulator of chromatin, subfamily e, member 1	NM_003079	1051	1160	NM_003079-1051-1160-+
54960	GEMIN8	gem (nuclear organelle) associated protein 8	NM_017856	631	900	NM_017856-631-900-+
9969	MED13	mediator complex subunit 13	NM_005121	3357	3870	NM_005121-3357-3870-+
4999	ORC2	origin recognition complex, subunit 2	NM_006190	2111	2368	NM_006190-2111-2368-+
10312	TCIRG1	T-cell, immune regulator 1, ATPase, H+ transporting, lysosomal V0 subunit A3	NM_006019	861	1036	NM_006019-861-1036-+
1998	ELF2	E74-like factor 2 (ets domain transcription factor)	NM_201999	1591	2300	NM_201999-1591-2300-+
10994	ILVBL	ilvB (bacterial acetolactate synthase)-like	NM_006844	1981	2200	NM_006844-1981-2200-+
9406	ZRANB2	zinc finger, RAN-binding domain containing 2	NM_005455	441	1084	NM_005455-441-1084-+
84326	C16orf13	chromosome 16 open reading frame 13	NM_032366	701	860	NM_032366-701-860-+
22862	FNDC3A	fibronectin type III domain containing 3A	NM_001278438	811	1172	NM_001278438-811-1172-+
527	ATP6V0C	ATPase, H+ transporting, lysosomal 16kDa, V0 subunit c	NM_001694	661	959	NM_001694-661-959-+
91746	YTHDC1	YTH domain containing 1	NM_001031732	88	290	NM_001031732-88-290-+
5111	PCNA	proliferating cell nuclear antigen	NM_002592	81	180	NM_002592-81-180-+
6137	RPL13	ribosomal protein L13	NM_033251	791	919	NM_033251-791-919-+
56478	EIF4ENIF1	eukaryotic translation initiation factor 4E nuclear import factor 1	NM_019843	871	1150	NM_019843-871-1150-+
5708	PSMD2	proteasome (prosome, macropain) 26S subunit, non-ATPase, 2	NM_002808	182	367	NM_002808-182-367-+
9861	PSMD6	proteasome (prosome, macropain) 26S subunit, non-ATPase, 6	NM_001271779	1501	1621	NM_001271779-1501-1621-+
8697	CDC23	cell division cycle 23	NM_004661	2441	2645	NM_004661-2441-2645-+
4296	MAP3K11	mitogen-activated protein kinase kinase kinase 11	NM_002419	2821	3130	NM_002419-2821-3130-+
25885	POLR1A	polymerase (RNA) I polypeptide A, 194kDa	NM_015425	3641	3820	NM_015425-3641-3820-+
5279	PIGC	phosphatidylinositol glycan anchor biosynthesis, class C	NM_002642	241	460	NM_002642-241-460-+
55749	CCAR1	cell division cycle and apoptosis regulator 1	NM_018237	2201	2410	NM_018237-2201-2410-+
55591	VEZT	vezatin, adherens junctions transmembrane protein	NM_017599	1951	2620	NM_017599-1951-2620-+
85363	TRIM5	tripartite motif containing 5	NM_033092	781	1070	NM_033092-781-1070-+
30844	EHD4	EH-domain containing 4	NM_139265	1591	2080	NM_139265-1591-2080-+
23406	COTL1	coactosin-like F-actin binding protein 1	NM_021149	521	840	NM_021149-521-840-+
340348	TSPAN33	tetraspanin 33	NM_178562	1881	2078	NM_178562-1881-2078-+
8458	TTF2	transcription termination factor, RNA polymerase II	NM_003594	1791	1910	NM_003594-1791-1910-+
4154	MBNL1	muscleblind-like splicing regulator 1	NM_021038	1141	1440	NM_021038-1141-1440-+
10013	HDAC6	histone deacetylase 6	NM_006044	29	390	NM_006044-29-390-+
23228	PLCL2	phospholipase C-like 2	NM_001144382	2111	2360	NM_001144382-2111-2360-+
80119	PIF1	PIF1 5'-to-3' DNA helicase	NM_001286499	431	710	NM_001286499-431-710-+
5326	PLAGL2	pleiomorphic adenoma gene-like 2	NM_002657	961	1090	NM_002657-961-1090-+
23770	FKBP8	FK506 binding protein 8, 38kDa	NM_012181	171	380	NM_012181-171-380-+
4152	MBD1	methyl-CpG binding domain protein 1	NM_015846	1301	1400	NM_015846-1301-1400-+
26225	ARL5A	ADP-ribosylation factor-like 5A	NM_012097	781	1150	NM_012097-781-1150-+
317781	DDX51	DEAD (Asp-Glu-Ala-Asp) box polypeptide 51	NM_175066	2191	2380	NM_175066-2191-2380-+
790	CAD	carbamoyl-phosphate synthetase 2, aspartate transcarbamylase, and dihydroorotase	NM_004341	5621	5820	NM_004341-5621-5820-+
8831	SYNGAP1	synaptic Ras GTPase activating protein 1	NM_006772	2621	2820	NM_006772-2621-2820-+
11040	PIM2	Pim-2 proto-oncogene, serine/threonine kinase	NM_006875	1801	1990	NM_006875-1801-1990-+
405	ARNT	aryl hydrocarbon receptor nuclear translocator	NM_001286035	2501	2780	NM_001286035-2501-2780-+
27069	GHITM	growth hormone inducible transmembrane protein	NM_014394	261	550	NM_014394-261-550-+
10625	IVNS1ABP	influenza virus NS1A binding protein	NM_006469	2191	2588	NM_006469-2191-2588-+
7094	TLN1	talin 1	NM_006289	731	979	NM_006289-731-979-+
54467	ANKIB1	ankyrin repeat and IBR domain containing 1	NM_019004	251	640	NM_019004-251-640-+
221037	JMJD1C	jumonji domain containing 1C	NM_032776	5085	5384	NM_032776-5085-5384-+
873	CBR1	carbonyl reductase 1	NM_001286789	1381	1690	NM_001286789-1381-1690-+
6747	SSR3	signal sequence receptor, gamma (translocon-associated protein gamma)	NM_007107	751	900	NM_007107-751-900-+
10113	PREB	prolactin regulatory element binding	NM_013388	1981	2160	NM_013388-1981-2160-+
10564	ARFGEF2	ADP-ribosylation factor guanine nucleotide-exchange factor 2 (brefeldin A-inhibited)	NM_006420	851	1120	NM_006420-851-1120-+
84946	LTV1	LTV1 ribosome biogenesis factor	NM_032860	1301	1430	NM_032860-1301-1430-+
56882	CDC42SE1	CDC42 small effector 1	NM_001038707	841	1300	NM_001038707-841-1300-+
79066	METTL16	methyltransferase like 16	NM_024086	1275	1833	NM_024086-1275-1833-+
4208	MEF2C	myocyte enhancer factor 2C	NM_002397	2501	2722	NM_002397-2501-2722-+
51780	KDM3B	lysine (K)-specific demethylase 3B	NM_016604	2631	2850	NM_016604-2631-2850-+
9665	KIAA0430	KIAA0430	NM_001184998	1891	2180	NM_001184998-1891-2180-+
9820	CUL7	cullin 7	NM_001168370	2021	2280	NM_001168370-2021-2280-+
6651	SON	SON DNA binding protein	NM_138927	1611	1720	NM_138927-1611-1720-+
11269	DDX19B	DEAD (Asp-Glu-Ala-Asp) box polypeptide 19B	NM_007242	191	290	NM_007242-191-290-+
57231	SNX14	sorting nexin 14	NM_153816	2971	3070	NM_153816-2971-3070-+
2271	FH	fumarate hydratase	NM_000143	1401	1591	NM_000143-1401-1591-+
255231	MCOLN2	mucolipin 2	NM_153259	1921	2255	NM_153259-1921-2255-+
3267	AGFG1	ArfGAP with FG repeats 1	NM_001135187	1904	2223	NM_001135187-1904-2223-+
23518	R3HDM1	R3H domain containing 1	NM_001282798	3611	3780	NM_001282798-3611-3780-+
152485	ZNF827	zinc finger protein 827	NM_178835	1431	1660	NM_178835-1431-1660-+
58506	SCAF1	SR-related CTD-associated factor 1	NM_021228	3021	3150	NM_021228-3021-3150-+
4208	MEF2C	myocyte enhancer factor 2C	NM_002397	1771	2170	NM_002397-1771-2170-+
51696	HECA	headcase homolog (Drosophila)	NM_016217	721	1050	NM_016217-721-1050-+
26054	SENP6	SUMO1/sentrin specific peptidase 6	NM_015571	3771	4070	NM_015571-3771-4070-+
54455	FBXO42	F-box protein 42	NM_018994	1641	1920	NM_018994-1641-1920-+
23231	SEL1L3	sel-1 suppressor of lin-12-like 3 (C. elegans)	NM_015187	521	840	NM_015187-521-840-+
3930	LBR	lamin B receptor	NM_002296	531	900	NM_002296-531-900-+
55684	RABL6	RAB, member RAS oncogene family-like 6	NM_001173988	2251	2406	NM_001173988-2251-2406-+
1778	DYNC1H1	dynein, cytoplasmic 1, heavy chain 1	NM_001376	9731	10045	NM_001376-9731-10045-+
92140	MTDH	metadherin	NM_178812	1584	1810	NM_178812-1584-1810-+
10899	JTB	jumping translocation breakpoint	NM_006694	1191	1333	NM_006694-1191-1333-+
64651	CSRNP1	cysteine-serine-rich nuclear protein 1	NM_033027	1341	1563	NM_033027-1341-1563-+
221035	REEP3	receptor accessory protein 3	NM_001001330	641	1000	NM_001001330-641-1000-+
79572	ATP13A3	ATPase type 13A3	NM_024524	3853	4091	NM_024524-3853-4091-+
26958	COPG2	coatomer protein complex, subunit gamma 2	NM_012133	2681	2890	NM_012133-2681-2890-+
26271	FBXO5	F-box protein 5	NM_001142522	811	1060	NM_001142522-811-1060-+
55183	RIF1	replication timing regulatory factor 1	NM_001177665	5831	6250	NM_001177665-5831-6250-+
53944	CSNK1G1	casein kinase 1, gamma 1	NM_022048	301	610	NM_022048-301-610-+
51593	SRRT	serrate, RNA effector molecule	NM_015908	181	380	NM_015908-181-380-+
5257	PHKB	phosphorylase kinase, beta	NM_001031835	3213	3670	NM_001031835-3213-3670-+
5586	PKN2	protein kinase N2	NM_006256	351	650	NM_006256-351-650-+
57862	ZNF410	zinc finger protein 410	NM_001242924	1982	2174	NM_001242924-1982-2174-+
9741	LAPTM4A	lysosomal protein transmembrane 4 alpha	NM_014713	1078	1286	NM_014713-1078-1286-+
9933	KIAA0020	KIAA0020	NM_014878	191	630	NM_014878-191-630-+
9209	LRRFIP2	leucine rich repeat (in FLII) interacting protein 2	NM_006309	171	302	NM_006309-171-302-+
23208	SYT11	synaptotagmin XI	NM_152280	461	870	NM_152280-461-870-+
3066	HDAC2	histone deacetylase 2	NM_001527	381	570	NM_001527-381-570-+
84991	RBM17	RNA binding motif protein 17	NM_001145547	1851	1996	NM_001145547-1851-1996-+
79073	TMEM109	transmembrane protein 109	NM_024092	1111	1320	NM_024092-1111-1320-+
5696	PSMB8	proteasome (prosome, macropain) subunit, beta type, 8	NM_004159	1241	1578	NM_004159-1241-1578-+
8546	AP3B1	adaptor-related protein complex 3, beta 1 subunit	NM_001271769	2207	2458	NM_001271769-2207-2458-+
31	ACACA	acetyl-CoA carboxylase alpha	NM_198839	10441	10643	NM_198839-10441-10643-+
8078	USP5	ubiquitin specific peptidase 5 (isopeptidase T)	NM_001098536	3041	3190	NM_001098536-3041-3190-+
57448	BIRC6	baculoviral IAP repeat containing 6	NM_016252	14551	14881	NM_016252-14551-14881-+
50848	F11R	F11 receptor	NM_016946	1991	2110	NM_016946-1991-2110-+
10569	SLU7	SLU7 splicing factor homolog (S. cerevisiae)	NM_006425	1591	1960	NM_006425-1591-1960-+
23508	TTC9	tetratricopeptide repeat domain 9	NM_015351	1191	1370	NM_015351-1191-1370-+
54495	TMX3	thioredoxin-related transmembrane protein 3	NM_019022	1299	1514	NM_019022-1299-1514-+
11176	BAZ2A	bromodomain adjacent to zinc finger domain, 2A	NM_001300905	2115	2710	NM_001300905-2115-2710-+
178	AGL	amylo-alpha-1, 6-glucosidase, 4-alpha-glucanotransferase	NM_000028	4121	4430	NM_000028-4121-4430-+
11269	DDX19B	DEAD (Asp-Glu-Ala-Asp) box polypeptide 19B	NM_007242	1471	1813	NM_007242-1471-1813-+
136319	MTPN	myotrophin	NM_145808	721	1008	NM_145808-721-1008-+
10342	TFG	TRK-fused gene	NM_006070	1381	1490	NM_006070-1381-1490-+
25836	NIPBL	Nipped-B homolog (Drosophila)	NM_015384	9191	9610	NM_015384-9191-9610-+
84916	CIRH1A	cirrhosis, autosomal recessive 1A (cirhin)	NM_032830_2	1001	1220	NM_032830_2-1001-1220-+
8803	SUCLA2	succinate-CoA ligase, ADP-forming, beta subunit	NM_003850	341	470	NM_003850-341-470-+
7403	KDM6A	lysine (K)-specific demethylase 6A	NM_001291415	2201	2420	NM_001291415-2201-2420-+
23168	RTF1	Rtf1, Paf1/RNA polymerase II complex component, homolog (S. cerevisiae)	NM_015138	321	451	NM_015138-321-451-+
5929	RBBP5	retinoblastoma binding protein 5	NM_005057	1131	1330	NM_005057-1131-1330-+
329	BIRC2	baculoviral IAP repeat containing 2	NM_001256163	2911	3060	NM_001256163-2911-3060-+
11342	RNF13	ring finger protein 13	NM_007282	1561	1945	NM_007282-1561-1945-+
23350	U2SURP	U2 snRNP-associated SURP domain containing	NM_001080415	2641	3177	NM_001080415-2641-3177-+
51138	COPS4	COP9 signalosome subunit 4	NM_016129	1221	1340	NM_016129-1221-1340-+
5710	PSMD4	proteasome (prosome, macropain) 26S subunit, non-ATPase, 4	NM_002810	1231	1330	NM_002810-1231-1330-+
1317	SLC31A1	solute carrier family 31 (copper transporter), member 1	NM_001859	861	1000	NM_001859-861-1000-+
4659	PPP1R12A	protein phosphatase 1, regulatory subunit 12A	NM_002480	3171	3470	NM_002480-3171-3470-+
255967	PAN3	PAN3 poly(A) specific ribonuclease subunit	NM_175854	2733	3040	NM_175854-2733-3040-+
51093	RRNAD1	ribosomal RNA adenine dimethylase domain containing 1	NM_015997	451	620	NM_015997-451-620-+
4677	NARS	asparaginyl-tRNA synthetase	NM_004539	1851	2020	NM_004539-1851-2020-+
8427	ZNF282	zinc finger protein 282	NM_003575	351	500	NM_003575-351-500-+
9736	USP34	ubiquitin specific peptidase 34	NM_014709	6361	6536	NM_014709-6361-6536-+
10463	SLC30A9	solute carrier family 30 (zinc transporter), member 9	NM_006345	671	871	NM_006345-671-871-+
10531	PITRM1	pitrilysin metallopeptidase 1	NM_001242307	1502	1670	NM_001242307-1502-1670-+
2631	GBAS	glioblastoma amplified sequence	NM_001483	114	340	NM_001483-114-340-+
9330	GTF3C3	general transcription factor IIIC, polypeptide 3, 102kDa	NM_012086	201	610	NM_012086-201-610-+
10424	PGRMC2	progesterone receptor membrane component 2	NM_006320	1571	1894	NM_006320-1571-1894-+
29072	SETD2	SET domain containing 2	NM_014159	7711	7840	NM_014159-7711-7840-+
6945	MLX	MLX, MAX dimerization protein	NM_170607	951	1080	NM_170607-951-1080-+
9400	RECQL5	RecQ protein-like 5	NM_004259	531	990	NM_004259-531-990-+
85406	DNAJC14	DnaJ (Hsp40) homolog, subfamily C, member 14	NM_032364	231	690	NM_032364-231-690-+
79595	SAP130	Sin3A-associated protein, 130kDa	NM_001145928	3141	3425	NM_001145928-3141-3425-+
9733	SART3	squamous cell carcinoma antigen recognized by T cells 3	NM_014706	1961	2204	NM_014706-1961-2204-+
4077	NBR1	neighbor of BRCA1 gene 1	NM_005899	2671	2770	NM_005899-2671-2770-+
4154	MBNL1	muscleblind-like splicing regulator 1	NM_021038	2901	3184	NM_021038-2901-3184-+
51053	GMNN	geminin, DNA replication inhibitor	NM_015895	651	851	NM_015895-651-851-+
26037	SIPA1L1	signal-induced proliferation-associated 1 like 1	NM_001284246	4961	5150	NM_001284246-4961-5150-+
50618	ITSN2	intersectin 2	NM_006277	1332	1770	NM_006277-1332-1770-+
22836	RHOBTB3	Rho-related BTB domain containing 3	NM_014899	1041	1360	NM_014899-1041-1360-+
54936	ADPRHL2	ADP-ribosylhydrolase like 2	NM_017825	1241	1510	NM_017825-1241-1510-+
50650	ARHGEF3	Rho guanine nucleotide exchange factor (GEF) 3	NM_001128616	2681	2970	NM_001128616-2681-2970-+
5229	PGGT1B	protein geranylgeranyltransferase type I, beta subunit	NM_005023	1001	1222	NM_005023-1001-1222-+
55585	UBE2Q1	ubiquitin-conjugating enzyme E2Q family member 1	NM_017582	1291	1703	NM_017582-1291-1703-+
26234	FBXL5	F-box and leucine-rich repeat protein 5	NM_012161	1384	1938	NM_012161-1384-1938-+
26031	OSBPL3	oxysterol binding protein-like 3	NM_015550	501	830	NM_015550-501-830-+
9123	SLC16A3	solute carrier family 16 (monocarboxylate transporter), member 3	NM_001206950	1771	1885	NM_001206950-1771-1885-+
9859	CEP170	centrosomal protein 170kDa	NM_014812	1191	1290	NM_014812-1191-1290-+
51463	GPR89B	G protein-coupled receptor 89B	NM_016334	1431	1650	NM_016334-1431-1650-+
10892	MALT1	MALT1 paracaspase	NM_006785	2251	2637	NM_006785-2251-2637-+
29028	ATAD2	ATPase family, AAA domain containing 2	NM_014109	651	1066	NM_014109-651-1066-+
58517	RBM25	RNA binding motif protein 25	NM_021239	1036	2037	NM_021239-1036-2037-+
55699	IARS2	isoleucyl-tRNA synthetase 2, mitochondrial	NM_018060	1561	1670	NM_018060-1561-1670-+
55298	RNF121	ring finger protein 121	NM_018320	1256	1522	NM_018320-1256-1522-+
79671	NLRX1	NLR family member X1	NM_001282144	1091	1250	NM_001282144-1091-1250-+
26020	LRP10	low density lipoprotein receptor-related protein 10	NM_014045	1491	1680	NM_014045-1491-1680-+
5591	PRKDC	protein kinase, DNA-activated, catalytic polypeptide	NM_006904	12557	12968	NM_006904-12557-12968-+
902	CCNH	cyclin H	NM_001199189	1171	1365	NM_001199189-1171-1365-+
114799	ESCO1	establishment of sister chromatid cohesion N-acetyltransferase 1	NM_052911	3391	3571	NM_052911-3391-3571-+
84336	TMEM101	transmembrane protein 101	NM_032376	761	890	NM_032376-761-890-+
51530	ZC3HC1	zinc finger, C3HC-type containing 1	NM_001282190	1861	1992	NM_001282190-1861-1992-+
23065	EMC1	ER membrane protein complex subunit 1	NM_015047	2661	2840	NM_015047-2661-2840-+
9827	RGP1	RGP1 retrograde golgi transport homolog (S. cerevisiae)	NM_001080496	1041	1510	NM_001080496-1041-1510-+
11059	WWP1	WW domain containing E3 ubiquitin protein ligase 1	NM_007013	581	760	NM_007013-581-760-+
9774	BCLAF1	BCL2-associated transcription factor 1	NM_014739	631	940	NM_014739-631-940-+
5531	PPP4C	protein phosphatase 4, catalytic subunit	NM_002720	891	1227	NM_002720-891-1227-+
663	BNIP2	BCL2/adenovirus E1B 19kDa interacting protein 2	NM_004330	531	850	NM_004330-531-850-+
54583	EGLN1	egl-9 family hypoxia-inducible factor 1	NM_022051	3541	4060	NM_022051-3541-4060-+
55157	DARS2	aspartyl-tRNA synthetase 2, mitochondrial	NM_018122	2371	2580	NM_018122-2371-2580-+
29980	DONSON	downstream neighbor of SON	NM_017613	1661	1830	NM_017613-1661-1830-+
56261	GPCPD1	glycerophosphocholine phosphodiesterase GDE1 homolog (S. cerevisiae)	NM_019593	1571	1720	NM_019593-1571-1720-+
9039	UBA3	ubiquitin-like modifier activating enzyme 3	NM_003968	1091	1500	NM_003968-1091-1500-+
6646	SOAT1	sterol O-acyltransferase 1	NM_003101	1777	2230	NM_003101-1777-2230-+
26168	SENP3	SUMO1/sentrin/SMT3 specific peptidase 3	NM_015670	641	870	NM_015670-641-870-+
56927	GPR108	G protein-coupled receptor 108	NM_001080452	1801	1923	NM_001080452-1801-1923-+
5903	RANBP2	RAN binding protein 2	NM_006267	4661	4790	NM_006267-4661-4790-+
9567	GTPBP1	GTP binding protein 1	NM_004286	1761	2020	NM_004286-1761-2020-+
26271	FBXO5	F-box protein 5	NM_001142522	421	770	NM_001142522-421-770-+
3843	IPO5	importin 5	NM_002271	3681	4100	NM_002271-3681-4100-+
2145	EZH1	enhancer of zeste 1 polycomb repressive complex 2 subunit	NM_001991	4101	4470	NM_001991-4101-4470-+
22889	KIAA0907	KIAA0907	NM_014949	1851	2050	NM_014949-1851-2050-+
23530	NNT	nicotinamide nucleotide transhydrogenase	NM_012343	311	590	NM_012343-311-590-+
55669	MFN1	mitofusin 1	NM_033540	1181	1357	NM_033540-1181-1357-+
10379	IRF9	interferon regulatory factor 9	NM_006084	51	150	NM_006084-51-150-+
9734	HDAC9	histone deacetylase 9	NM_178423	1601	1875	NM_178423-1601-1875-+
89849	ATG16L2	autophagy related 16-like 2 (S. cerevisiae)	NM_033388	481	640	NM_033388-481-640-+
8884	SLC5A6	solute carrier family 5 (sodium/multivitamin and iodide cotransporter), member 6	NM_021095	421	640	NM_021095-421-640-+
8697	CDC23	cell division cycle 23	NM_004661	1751	1940	NM_004661-1751-1940-+
23218	NBEAL2	neurobeachin-like 2	NM_015175	5791	5940	NM_015175-5791-5940-+
7511	XPNPEP1	X-prolyl aminopeptidase (aminopeptidase P) 1, soluble	NM_020383	1081	1280	NM_020383-1081-1280-+
28976	ACAD9	acyl-CoA dehydrogenase family, member 9	NM_014049	2211	2460	NM_014049-2211-2460-+
84196	USP48	ubiquitin specific peptidase 48	NM_032236	2041	2230	NM_032236-2041-2230-+
23198	PSME4	proteasome (prosome, macropain) activator subunit 4	NM_014614	2801	2960	NM_014614-2801-2960-+
3980	LIG3	ligase III, DNA, ATP-dependent	NM_013975	291	660	NM_013975-291-660-+
10933	MORF4L1	mortality factor 4 like 1	NM_206839	477	857	NM_206839-477-857-+
83416	FCRL5	Fc receptor-like 5	NM_031281	551	660	NM_031281-551-660-+
8816	DCAF5	DDB1 and CUL4 associated factor 5	NM_003861	4591	4875	NM_003861-4591-4875-+
8481	OFD1	oral-facial-digital syndrome 1	NM_003611	3021	3170	NM_003611-3021-3170-+
831	CAST	calpastatin	NM_001042440	511	730	NM_001042440-511-730-+
11018	TMED1	transmembrane emp24 protein transport domain containing 1	NM_006858	731	950	NM_006858-731-950-+
59339	PLEKHA2	pleckstrin homology domain containing, family A (phosphoinositide binding specific) member 2	NM_021623	1211	1530	NM_021623-1211-1530-+
5428	POLG	polymerase (DNA directed), gamma	NM_002693	1641	1850	NM_002693-1641-1850-+
23533	PIK3R5	phosphoinositide-3-kinase, regulatory subunit 5	NM_001251851	1101	1290	NM_001251851-1101-1290-+
152485	ZNF827	zinc finger protein 827	NM_178835	3991	4180	NM_178835-3991-4180-+
29882	ANAPC2	anaphase promoting complex subunit 2	NM_013366	341	806	NM_013366-341-806-+
79654	HECTD3	HECT domain containing E3 ubiquitin protein ligase 3	NM_024602	2971	3200	NM_024602-2971-3200-+
25979	DHRS7B	dehydrogenase/reductase (SDR family) member 7B	NM_015510	903	1278	NM_015510-903-1278-+
28973	MRPS18B	mitochondrial ribosomal protein S18B	NM_014046	811	990	NM_014046-811-990-+
1915	EEF1A1	eukaryotic translation elongation factor 1 alpha 1	NM_001402	1401	1701	NM_001402-1401-1701-+
5526	PPP2R5B	protein phosphatase 2, regulatory subunit B', beta	NM_006244	841	990	NM_006244-841-990-+
9320	TRIP12	thyroid hormone receptor interactor 12	NM_001284214	6084	6515	NM_001284214-6084-6515-+
141	ADPRH	ADP-ribosylarginine hydrolase	NM_001125	494	620	NM_001125-494-620-+
26168	SENP3	SUMO1/sentrin/SMT3 specific peptidase 3	NM_015670	151	380	NM_015670-151-380-+
10087	COL4A3BP	collagen, type IV, alpha 3 (Goodpasture antigen) binding protein	NM_001130105	1694	1886	NM_001130105-1694-1886-+
6342	SCP2	sterol carrier protein 2	NM_002979	1491	1670	NM_002979-1491-1670-+
8451	CUL4A	cullin 4A	NM_001278513	2417	2874	NM_001278513-2417-2874-+
9802	DAZAP2	DAZ associated protein 2	NM_014764	109	340	NM_014764-109-340-+
9818	NUPL1	nucleoporin like 1	NM_014089	1841	2120	NM_014089-1841-2120-+
4758	NEU1	sialidase 1 (lysosomal sialidase)	NM_000434_4	1351	1580	NM_000434_4-1351-1580-+
22978	NT5C2	5'-nucleotidase, cytosolic II	NM_012229	2101	2260	NM_012229-2101-2260-+
121642	ALKBH2	alkB, alkylation repair homolog 2 (E. coli)	NM_001145374	342	550	NM_001145374-342-550-+
9031	BAZ1B	bromodomain adjacent to zinc finger domain, 1B	NM_032408	2681	2910	NM_032408-2681-2910-+
4204	MECP2	methyl CpG binding protein 2	NM_004992	221	390	NM_004992-221-390-+
51202	DDX47	DEAD (Asp-Glu-Ala-Asp) box polypeptide 47	NM_016355	11	170	NM_016355-11-170-+
51128	SAR1B	secretion associated, Ras related GTPase 1B	NM_001033503	641	947	NM_001033503-641-947-+
141	ADPRH	ADP-ribosylarginine hydrolase	NM_001125	1311	1500	NM_001125-1311-1500-+
23367	LARP1	La ribonucleoprotein domain family, member 1	NM_015315	2991	3127	NM_015315-2991-3127-+
10788	IQGAP2	IQ motif containing GTPase activating protein 2	NM_006633	4621	4840	NM_006633-4621-4840-+
26136	TES	testin LIM domain protein	NM_015641	171	340	NM_015641-171-340-+
1387	CREBBP	CREB binding protein	NM_004380	651	900	NM_004380-651-900-+
3422	IDI1	isopentenyl-diphosphate delta isomerase 1	NM_004508	651	975	NM_004508-651-975-+
8295	TRRAP	transformation/transcription domain-associated protein	NM_001244580	2031	2180	NM_001244580-2031-2180-+
5066	PAM	peptidylglycine alpha-amidating monooxygenase	NM_000919	1381	1888	NM_000919-1381-1888-+
80021	TMEM62	transmembrane protein 62	NM_024956	2246	2510	NM_024956-2246-2510-+
8872	CDC123	cell division cycle 123	NM_006023	1391	1510	NM_006023-1391-1510-+
80007	C10orf88	chromosome 10 open reading frame 88	NM_024942	961	1130	NM_024942-961-1130-+
8202	NCOA3	nuclear receptor coactivator 3	NM_181659	4091	4210	NM_181659-4091-4210-+
8621	CDK13	cyclin-dependent kinase 13	NM_003718	4431	4954	NM_003718-4431-4954-+
6867	TACC1	transforming, acidic coiled-coil containing protein 1	NM_006283	2511	3026	NM_006283-2511-3026-+
2590	GALNT2	polypeptide N-acetylgalactosaminyltransferase 2	NM_001291866	1661	2570	NM_001291866-1661-2570-+
4864	NPC1	Niemann-Pick disease, type C1	NM_000271	1471	1830	NM_000271-1471-1830-+
64764	CREB3L2	cAMP responsive element binding protein 3-like 2	NM_194071	1191	1403	NM_194071-1191-1403-+
83605	CCM2	cerebral cavernous malformation 2	NM_031443	81	350	NM_031443-81-350-+
8992	ATP6V0E1	ATPase, H+ transporting, lysosomal 9kDa, V0 subunit e1	NM_003945	595	822	NM_003945-595-822-+
4860	PNP	purine nucleoside phosphorylase	NM_000270	1331	1494	NM_000270-1331-1494-+
93973	ACTR8	ARP8 actin-related protein 8 homolog (yeast)	NM_022899	58	190	NM_022899-58-190-+
7462	LAT2	linker for activation of T cells family, member 2	NM_032464	1301	1629	NM_032464-1301-1629-+
10955	SERINC3	serine incorporator 3	NM_006811	881	1150	NM_006811-881-1150-+
80267	EDEM3	ER degradation enhancer, mannosidase alpha-like 3	NM_025191	2742	3190	NM_025191-2742-3190-+
54431	DNAJC10	DnaJ (Hsp40) homolog, subfamily C, member 10	NM_018981	2871	3265	NM_018981-2871-3265-+
79654	HECTD3	HECT domain containing E3 ubiquitin protein ligase 3	NM_024602	3271	3440	NM_024602-3271-3440-+
11196	SEC23IP	SEC23 interacting protein	NM_007190	2291	2446	NM_007190-2291-2446-+
4289	MKLN1	muskelin 1, intracellular mediator containing kelch motifs	NM_001145354	2271	2550	NM_001145354-2271-2550-+
4967	OGDH	oxoglutarate (alpha-ketoglutarate) dehydrogenase (lipoamide)	NM_002541	95	490	NM_002541-95-490-+
6430	SRSF5	serine/arginine-rich splicing factor 5	NM_001039465	1021	1213	NM_001039465-1021-1213-+
890	CCNA2	cyclin A2	NM_001237	1481	1670	NM_001237-1481-1670-+
8816	DCAF5	DDB1 and CUL4 associated factor 5	NM_003861	2593	3164	NM_003861-2593-3164-+
6873	TAF2	TAF2 RNA polymerase II, TATA box binding protein (TBP)-associated factor, 150kDa	NM_003184	3601	3929	NM_003184-3601-3929-+
55827	DCAF6	DDB1 and CUL4 associated factor 6	NM_001198956	2431	2620	NM_001198956-2431-2620-+
955	ENTPD6	ectonucleoside triphosphate diphosphohydrolase 6 (putative)	NM_001247	1611	2000	NM_001247-1611-2000-+
55178	RNMTL1	RNA methyltransferase like 1	NM_018146	1241	1440	NM_018146-1241-1440-+
58490	RPRD1B	regulation of nuclear pre-mRNA domain containing 1B	NM_021215	1091	1719	NM_021215-1091-1719-+
65056	GPBP1	GC-rich promoter binding protein 1	NM_022913	2661	2977	NM_022913-2661-2977-+
27327	TNRC6A	trinucleotide repeat containing 6A	NM_014494	3031	3220	NM_014494-3031-3220-+
23031	MAST3	microtubule associated serine/threonine kinase 3	NM_015016	3321	3500	NM_015016-3321-3500-+
10121	ACTR1A	ARP1 actin-related protein 1 homolog A, centractin alpha (yeast)	NM_005736	1261	1574	NM_005736-1261-1574-+
9031	BAZ1B	bromodomain adjacent to zinc finger domain, 1B	NM_032408	4991	5156	NM_032408-4991-5156-+
79068	FTO	fat mass and obesity associated	NM_001080432	541	1020	NM_001080432-541-1020-+
54887	UHRF1BP1	UHRF1 binding protein 1	NM_017754	2971	3270	NM_017754-2971-3270-+
57609	DIP2B	DIP2 disco-interacting protein 2 homolog B (Drosophila)	NM_173602	221	450	NM_173602-221-450-+
23505	TMEM131	transmembrane protein 131	NM_015348	5691	6191	NM_015348-5691-6191-+
5538	PPT1	palmitoyl-protein thioesterase 1	NM_000310	253	390	NM_000310-253-390-+
2342	FNTB	farnesyltransferase, CAAX box, beta	NM_002028	2121	2380	NM_002028-2121-2380-+
151987	PPP4R2	protein phosphatase 4, regulatory subunit 2	NM_174907	1141	1430	NM_174907-1141-1430-+
27107	ZBTB11	zinc finger and BTB domain containing 11	NM_014415	2941	3460	NM_014415-2941-3460-+
5073	PARN	poly(A)-specific ribonuclease	NM_002582	1831	1930	NM_002582-1831-1930-+
55629	PNRC2	proline-rich nuclear receptor coactivator 2	NM_017761	292	757	NM_017761-292-757-+
8452	CUL3	cullin 3	NM_003590	2431	2850	NM_003590-2431-2850-+
26136	TES	testin LIM domain protein	NM_015641	1481	1602	NM_015641-1481-1602-+
5190	PEX6	peroxisomal biogenesis factor 6	NM_000287	561	1030	NM_000287-561-1030-+
1778	DYNC1H1	dynein, cytoplasmic 1, heavy chain 1	NM_001376	14155	14335	NM_001376-14155-14335-+
79888	LPCAT1	lysophosphatidylcholine acyltransferase 1	NM_024830_2	3191	3606	NM_024830_2-3191-3606-+
26009	ZZZ3	zinc finger, ZZ-type containing 3	NM_015534	631	830	NM_015534-631-830-+
5863	RGL2	ral guanine nucleotide dissociation stimulator-like 2	NM_004761_5	3181	3332	NM_004761_5-3181-3332-+
92140	MTDH	metadherin	NM_178812	661	1000	NM_178812-661-1000-+
56254	RNF20	ring finger protein 20, E3 ubiquitin protein ligase	NM_019592	1724	2012	NM_019592-1724-2012-+
58528	RRAGD	Ras-related GTP binding D	NM_021244	511	790	NM_021244-511-790-+
2037	EPB41L2	erythrocyte membrane protein band 4.1-like 2	NM_001431	2189	2370	NM_001431-2189-2370-+
79801	SHCBP1	SHC SH2-domain binding protein 1	NM_024745	1709	2062	NM_024745-1709-2062-+
55122	AKIRIN2	akirin 2	NM_018064	481	650	NM_018064-481-650-+
7867	MAPKAPK3	mitogen-activated protein kinase-activated protein kinase 3	NM_001243926	1741	1880	NM_001243926-1741-1880-+
54887	UHRF1BP1	UHRF1 binding protein 1	NM_017754	4371	4766	NM_017754-4371-4766-+
51031	GLOD4	glyoxalase domain containing 4	NM_016080	1181	1340	NM_016080-1181-1340-+
3703	STT3A	STT3A, subunit of the oligosaccharyltransferase complex (catalytic)	NM_001278503	2378	2570	NM_001278503-2378-2570-+
160760	PPTC7	PTC7 protein phosphatase homolog (S. cerevisiae)	NM_139283	260	591	NM_139283-260-591-+
23113	CUL9	cullin 9	NM_015089	7461	7620	NM_015089-7461-7620-+
4087	SMAD2	SMAD family member 2	NM_001003652	1641	1988	NM_001003652-1641-1988-+
9669	EIF5B	eukaryotic translation initiation factor 5B	NM_015904	1731	1840	NM_015904-1731-1840-+
55037	PTCD3	pentatricopeptide repeat domain 3	NM_017952	2061	2310	NM_017952-2061-2310-+
7529	YWHAB	tyrosine 3-monooxygenase/tryptophan 5-monooxygenase activation protein, beta	NM_003404	2731	2950	NM_003404-2731-2950-+
960	CD44	CD44 molecule (Indian blood group)	NM_000610	2501	2743	NM_000610-2501-2743-+
23118	TAB2	TGF-beta activated kinase 1/MAP3K7 binding protein 2	NM_015093	601	830	NM_015093-601-830-+
9969	MED13	mediator complex subunit 13	NM_005121	1351	1980	NM_005121-1351-1980-+
27327	TNRC6A	trinucleotide repeat containing 6A	NM_014494	661	900	NM_014494-661-900-+
9922	IQSEC1	IQ motif and Sec7 domain 1	NM_001134382	1031	1210	NM_001134382-1031-1210-+
114785	MBD6	methyl-CpG binding domain protein 6	NM_052897	3131	3300	NM_052897-3131-3300-+
10607	TBL3	transducin (beta)-like 3	NM_006453	2381	2564	NM_006453-2381-2564-+
11070	TMEM115	transmembrane protein 115	NM_007024	1751	1970	NM_007024-1751-1970-+
81556	VWA9	von Willebrand factor A domain containing 9	NM_001136043	1551	2221	NM_001136043-1551-2221-+
51264	MRPL27	mitochondrial ribosomal protein L27	NM_016504	407	700	NM_016504-407-700-+
9972	NUP153	nucleoporin 153kDa	NM_001278209	2501	2944	NM_001278209-2501-2944-+
94081	SFXN1	sideroflexin 1	NM_022754	1414	1710	NM_022754-1414-1710-+
10276	NET1	neuroepithelial cell transforming 1	NM_001047160	1781	2008	NM_001047160-1781-2008-+
10939	AFG3L2	AFG3-like AAA ATPase 2	NM_006796	2329	2673	NM_006796-2329-2673-+
3459	IFNGR1	interferon gamma receptor 1	NM_000416	1071	1561	NM_000416-1071-1561-+
7799	PRDM2	PR domain containing 2, with ZNF domain	NM_012231	3101	3380	NM_012231-3101-3380-+
23277	CLUH	clustered mitochondria (cluA/CLU1) homolog	NM_015229	1341	1550	NM_015229-1341-1550-+
6533	SLC6A6	solute carrier family 6 (neurotransmitter transporter), member 6	NM_003043	181	290	NM_003043-181-290-+
79670	ZCCHC6	zinc finger, CCHC domain containing 6	NM_024617	211	870	NM_024617-211-870-+
79897	RPP21	ribonuclease P/MRP 21kDa subunit	NM_001199120	421	554	NM_001199120-421-554-+
92703	TMEM183A	transmembrane protein 183A	NM_138391	301	500	NM_138391-301-500-+
27032	ATP2C1	ATPase, Ca++ transporting, type 2C, member 1	NM_001199179	1811	2010	NM_001199179-1811-2010-+
57592	ZNF687	zinc finger protein 687	NM_020832	321	600	NM_020832-321-600-+
1656	DDX6	DEAD (Asp-Glu-Ala-Asp) box helicase 6	NM_004397	340	700	NM_004397-340-700-+
2553	GABPB1	GA binding protein transcription factor, beta subunit 1	NM_005254	1421	1741	NM_005254-1421-1741-+
11218	DDX20	DEAD (Asp-Glu-Ala-Asp) box polypeptide 20	NM_007204	2021	2940	NM_007204-2021-2940-+
10198	MPHOSPH9	M-phase phosphoprotein 9	NM_022782	831	1070	NM_022782-831-1070-+
153241	CEP120	centrosomal protein 120kDa	NM_153223	2081	2270	NM_153223-2081-2270-+
9150	CTDP1	CTD (carboxy-terminal domain, RNA polymerase II, polypeptide A) phosphatase, subunit 1	NM_004715	1711	1920	NM_004715-1711-1920-+
84522	JAGN1	jagunal homolog 1 (Drosophila)	NM_032492	881	1050	NM_032492-881-1050-+
5514	PPP1R10	protein phosphatase 1, regulatory subunit 10	NM_002714_4	181	370	NM_002714_4-181-370-+
6195	RPS6KA1	ribosomal protein S6 kinase, 90kDa, polypeptide 1	NM_002953	3061	3175	NM_002953-3061-3175-+
83982	IFI27L2	interferon, alpha-inducible protein 27-like 2	NM_032036	331	460	NM_032036-331-460-+
127253	TYW3	tRNA-yW synthesizing protein 3 homolog (S. cerevisiae)	NM_138467	551	860	NM_138467-551-860-+
8925	HERC1	HECT and RLD domain containing E3 ubiquitin protein ligase family member 1	NM_003922	4161	4441	NM_003922-4161-4441-+
282809	POC1B	POC1 centriolar protein B	NM_172240	1841	2065	NM_172240-1841-2065-+
79723	SUV39H2	suppressor of variegation 3-9 homolog 2 (Drosophila)	NM_001193424	311	670	NM_001193424-311-670-+
22916	NCBP2	nuclear cap binding protein subunit 2, 20kDa	NM_007362	611	800	NM_007362-611-800-+
7918	GPANK1	G patch domain and ankyrin repeats 1	NM_001199237_2	821	1156	NM_001199237_2-821-1156-+
113510	HELQ	helicase, POLQ-like	NM_001297756	501	1187	NM_001297756-501-1187-+
55167	MSL2	male-specific lethal 2 homolog (Drosophila)	NM_018133	901	1740	NM_018133-901-1740-+
831	CAST	calpastatin	NM_001042440	2101	2260	NM_001042440-2101-2260-+
79033	ERI3	ERI1 exoribonuclease family member 3	NM_024066	1571	1722	NM_024066-1571-1722-+
115201	ATG4A	autophagy related 4A, cysteine peptidase	NM_052936	1311	1660	NM_052936-1311-1660-+
145853	C15orf61	chromosome 15 open reading frame 61	NM_001143936	351	550	NM_001143936-351-550-+
23299	BICD2	bicaudal D homolog 2 (Drosophila)	NM_001003800	6271	6410	NM_001003800-6271-6410-+
9136	RRP9	ribosomal RNA processing 9, small subunit (SSU) processome component, homolog (yeast)	NM_004704	111	497	NM_004704-111-497-+
54778	RNF111	ring finger protein 111	NM_001270528	3151	3540	NM_001270528-3151-3540-+
9784	SNX17	sorting nexin 17	NM_014748	134	290	NM_014748-134-290-+
84276	NICN1	nicolin 1	NM_032316	921	1230	NM_032316-921-1230-+
6830	SUPT6H	suppressor of Ty 6 homolog (S. cerevisiae)	NM_003170	5241	5400	NM_003170-5241-5400-+
51362	CDC40	cell division cycle 40	NM_015891	457	820	NM_015891-457-820-+
3091	HIF1A	hypoxia inducible factor 1, alpha subunit (basic helix-loop-helix transcription factor)	NM_001530	2098	2516	NM_001530-2098-2516-+
130535	KCTD18	potassium channel tetramerization domain containing 18	NM_152387	1666	1900	NM_152387-1666-1900-+
10454	TAB1	TGF-beta activated kinase 1/MAP3K7 binding protein 1	NM_006116	2221	2330	NM_006116-2221-2330-+
59349	KLHL12	kelch-like family member 12	NM_021633	2312	2753	NM_021633-2312-2753-+
64794	DDX31	DEAD (Asp-Glu-Ala-Asp) box polypeptide 31	NM_022779	561	770	NM_022779-561-770-+
79101	TAF1D	TATA box binding protein (TBP)-associated factor, RNA polymerase I, D, 41kDa	NM_024116	401	590	NM_024116-401-590-+
56894	AGPAT3	1-acylglycerol-3-phosphate O-acyltransferase 3	NM_020132	1248	1636	NM_020132-1248-1636-+
3608	ILF2	interleukin enhancer binding factor 2	NM_001267809	51	190	NM_001267809-51-190-+
4296	MAP3K11	mitogen-activated protein kinase kinase kinase 11	NM_002419	51	270	NM_002419-51-270-+
8837	CFLAR	CASP8 and FADD-like apoptosis regulator	NM_001202519	1131	1230	NM_001202519-1131-1230-+
9392	TGFBRAP1	transforming growth factor, beta receptor associated protein 1	NM_004257	2601	3160	NM_004257-2601-3160-+
23291	FBXW11	F-box and WD repeat domain containing 11	NM_012300	2241	2470	NM_012300-2241-2470-+
51528	JKAMP	JNK1/MAPK8-associated membrane protein	NM_001284201	751	860	NM_001284201-751-860-+
23350	U2SURP	U2 snRNP-associated SURP domain containing	NM_001080415	2361	2620	NM_001080415-2361-2620-+
57187	THOC2	THO complex 2	NM_001081550	3681	4230	NM_001081550-3681-4230-+
8971	H1FX	H1 histone family, member X	NM_006026	761	980	NM_006026-761-980-+
128240	APOA1BP	apolipoprotein A-I binding protein	NM_144772	871	1100	NM_144772-871-1100-+
60488	MRPS35	mitochondrial ribosomal protein S35	NM_021821	711	1055	NM_021821-711-1055-+
5929	RBBP5	retinoblastoma binding protein 5	NM_005057	1481	1670	NM_005057-1481-1670-+
55914	ERBB2IP	erbb2 interacting protein	NM_001253699	1771	2014	NM_001253699-1771-2014-+
115294	PCMTD1	protein-L-isoaspartate (D-aspartate) O-methyltransferase domain containing 1	NM_052937	291	670	NM_052937-291-670-+
8812	CCNK	cyclin K	NM_001099402	931	1220	NM_001099402-931-1220-+
80216	ALPK1	alpha-kinase 1	NM_025144	1671	2000	NM_025144-1671-2000-+
129450	TYW5	tRNA-yW synthesizing protein 5	NM_001039693	1021	1330	NM_001039693-1021-1330-+
7709	ZBTB17	zinc finger and BTB domain containing 17	NM_001287603	901	1070	NM_001287603-901-1070-+
4189	DNAJB9	DnaJ (Hsp40) homolog, subfamily B, member 9	NM_012328	541	701	NM_012328-541-701-+
10313	RTN3	reticulon 3	NM_001265589	61	200	NM_001265589-61-200-+
9320	TRIP12	thyroid hormone receptor interactor 12	NM_001284214	381	860	NM_001284214-381-860-+
57142	RTN4	reticulon 4	NM_020532	271	660	NM_020532-271-660-+
3695	ITGB7	integrin, beta 7	NM_000889	2561	2860	NM_000889-2561-2860-+
23513	SCRIB	scribbled planar cell polarity protein	NM_182706	1701	1870	NM_182706-1701-1870-+
85369	STRIP1	striatin interacting protein 1	NM_033088	1111	1220	NM_033088-1111-1220-+
471	ATIC	5-aminoimidazole-4-carboxamide ribonucleotide formyltransferase/IMP cyclohydrolase	NM_004044	1911	2076	NM_004044-1911-2076-+
114823	LENG8	leukocyte receptor cluster (LRC) member 8	NM_052925	3451	3673	NM_052925-3451-3673-+
8648	NCOA1	nuclear receptor coactivator 1	NM_147223	2331	2530	NM_147223-2331-2530-+
51663	ZFR	zinc finger RNA binding protein	NM_016107	1908	2136	NM_016107-1908-2136-+
5537	PPP6C	protein phosphatase 6, catalytic subunit	NM_001123355	1301	1480	NM_001123355-1301-1480-+
8568	RRP1	ribosomal RNA processing 1	NM_003683	1401	1800	NM_003683-1401-1800-+
8697	CDC23	cell division cycle 23	NM_004661	401	560	NM_004661-401-560-+
55239	OGFOD1	2-oxoglutarate and iron-dependent oxygenase domain containing 1	NM_018233	1241	1420	NM_018233-1241-1420-+
3298	HSF2	heat shock transcription factor 2	NM_004506	1661	1816	NM_004506-1661-1816-+
51021	MRPS16	mitochondrial ribosomal protein S16	NM_016065	581	732	NM_016065-581-732-+
9960	USP3	ubiquitin specific peptidase 3	NM_006537	1641	1952	NM_006537-1641-1952-+
9474	ATG5	autophagy related 5	NM_004849	1141	1645	NM_004849-1141-1645-+
54832	VPS13C	vacuolar protein sorting 13 homolog C (S. cerevisiae)	NM_001018088	8122	8370	NM_001018088-8122-8370-+
6391	SDHC	succinate dehydrogenase complex, subunit C, integral membrane protein, 15kDa	NM_003001	11	170	NM_003001-11-170-+
4820	NKTR	natural killer cell triggering receptor	NM_005385	1551	1760	NM_005385-1551-1760-+
57674	RNF213	ring finger protein 213	NM_001256071	9911	10110	NM_001256071-9911-10110-+
55654	TMEM127	transmembrane protein 127	NM_017849	2491	2950	NM_017849-2491-2950-+
10717	AP4B1	adaptor-related protein complex 4, beta 1 subunit	NM_006594	2221	2482	NM_006594-2221-2482-+
5306	PITPNA	phosphatidylinositol transfer protein, alpha	NM_006224	451	660	NM_006224-451-660-+
9181	ARHGEF2	Rho/Rac guanine nucleotide exchange factor (GEF) 2	NM_001162383	3011	3340	NM_001162383-3011-3340-+
5286	PIK3C2A	phosphatidylinositol-4-phosphate 3-kinase, catalytic subunit type 2 alpha	NM_002645	1	370	NM_002645-1-370-+
147179	WIPF2	WAS/WASL interacting protein family, member 2	NM_133264	1671	1870	NM_133264-1671-1870-+
64746	ACBD3	acyl-CoA binding domain containing 3	NM_022735	548	785	NM_022735-548-785-+
3709	ITPR2	inositol 1,4,5-trisphosphate receptor, type 2	NM_002223	5811	6190	NM_002223-5811-6190-+
9859	CEP170	centrosomal protein 170kDa	NM_014812	3061	3320	NM_014812-3061-3320-+
467	ATF3	activating transcription factor 3	NM_001040619	521	658	NM_001040619-521-658-+
23077	MYCBP2	MYC binding protein 2, E3 ubiquitin protein ligase	NM_015057	9397	9718	NM_015057-9397-9718-+
[truncated: 862 more rows]
