# Supplementary material for: Evolution of transcript modification by N6-methyladenosine in primates
Source: HighWire-hosted journal article supplement (doi:10.1101/gr.212563.116), 2017-01-04
Supplement: Supplemental_Table_S10.xlsx [file Supplemental_Table_S10.xlsx]

## Sheet: sTable10.HumanGainPeaks
Gid	Symbol	Description	Refseq_NM	Start	End	PeakName
9403	SEP15	15 kDa selenoprotein	NM_004261	326	450	NM_004261-326-450-+
10152	ABI2	abl-interactor 2	NM_001282925	321	530	NM_001282925-321-530-+
35	ACADS	acyl-CoA dehydrogenase, C-2 to C-3 short chain	NM_000017	1801	1910	NM_000017-1801-1910-+
81792	ADAMTS12	ADAM metallopeptidase with thrombospondin type 1 motif, 12	NM_030955	311	580	NM_030955-311-580-+
81792	ADAMTS12	ADAM metallopeptidase with thrombospondin type 1 motif, 12	NM_030955	3561	4080	NM_030955-3561-4080-+
84059	ADGRV1	adhesion G protein-coupled receptor V1	NM_032119	3941	4517	NM_032119-3941-4517-+
84890	ADO	2-aminoethanethiol (cysteamine) dioxygenase	NM_032804	395	650	NM_032804-395-650-+
84890	ADO	2-aminoethanethiol (cysteamine) dioxygenase	NM_032804	731	1286	NM_032804-731-1286-+
56894	AGPAT3	1-acylglycerol-3-phosphate O-acyltransferase 3	NM_020132	2201	2370	NM_020132-2201-2370-+
196	AHR	aryl hydrocarbon receptor	NM_001621	1861	2040	NM_001621-1861-2040-+
80216	ALPK1	alpha-kinase 1	NM_025144	2851	3010	NM_025144-2851-3010-+
286	ANK1	ankyrin 1, erythrocytic	NM_001142446	3389	3590	NM_001142446-3389-3590-+
56172	ANKH	ANKH inorganic pyrophosphate transport regulator	NM_054027	1961	2230	NM_054027-1961-2230-+
54443	ANLN	anillin, actin binding protein	NM_018685	2481	2580	NM_018685-2481-2580-+
164	AP1G1	adaptor-related protein complex 1, gamma 1 subunit	NM_001030007	2041	2240	NM_001030007-2041-2240-+
80830	APOL6	apolipoprotein L, 6	NM_030641	401	550	NM_030641-401-550-+
80830	APOL6	apolipoprotein L, 6	NM_030641	951	1307	NM_030641-951-1307-+
80830	APOL6	apolipoprotein L, 6	NM_030641	83	310	NM_030641-83-310-+
382	ARF6	ADP-ribosylation factor 6	NM_001663	78	260	NM_001663-78-260-+
2909	ARHGAP35	Rho GTPase activating protein 35	NM_004491	2641	2770	NM_004491-2641-2770-+
2909	ARHGAP35	Rho GTPase activating protein 35	NM_004491	4251	4370	NM_004491-4251-4370-+
196528	ARID2	AT rich interactive domain 2 (ARID, RFX-like)	NM_152641	2511	2640	NM_152641-2511-2640-+
196528	ARID2	AT rich interactive domain 2 (ARID, RFX-like)	NM_152641	2891	3040	NM_152641-2891-3040-+
84159	ARID5B	AT rich interactive domain 5B (MRF1-like)	NM_032199	3901	4000	NM_032199-3901-4000-+
84159	ARID5B	AT rich interactive domain 5B (MRF1-like)	NM_032199	2111	2270	NM_032199-2111-2270-+
84159	ARID5B	AT rich interactive domain 5B (MRF1-like)	NM_032199	1751	1960	NM_032199-1751-1960-+
84159	ARID5B	AT rich interactive domain 5B (MRF1-like)	NM_032199	2821	3060	NM_032199-2821-3060-+
1388	ATF6B	activating transcription factor 6 beta	NM_004381	1541	1680	NM_004381-1541-1680-+
55729	ATF7IP	activating transcription factor 7 interacting protein	NM_181352	2281	2420	NM_181352-2281-2420-+
472	ATM	ATM serine/threonine kinase	NM_000051	4221	4380	NM_000051-4221-4380-+
23300	ATMIN	ATM interactor	NM_015251	1481	1770	NM_015251-1481-1770-+
513	ATP5D	ATP synthase, H+ transporting, mitochondrial F1 complex, delta subunit	NM_001687	51	170	NM_001687-51-170-+
535	ATP6V0A1	ATPase, H+ transporting, lysosomal V0 subunit a1	NM_001130020	3801	3990	NM_001130020-3801-3990-+
26053	AUTS2	autism susceptibility candidate 2	NM_015570	1531	1650	NM_015570-1531-1650-+
9331	B4GALT6	UDP-Gal:betaGlcNAc beta 1,4- galactosyltransferase, polypeptide 6	NM_004775	51	190	NM_004775-51-190-+
23786	BCL2L13	BCL2-like 13 (apoptosis facilitator)	NM_015367	921	1120	NM_015367-921-1120-+
283149	BCL9L	B-cell CLL/lymphoma 9-like	NM_182557	2801	2900	NM_182557-2801-2900-+
330	BIRC3	baculoviral IAP repeat containing 3	NM_001165	3921	4470	NM_001165-3921-4470-+
659	BMPR2	bone morphogenetic protein receptor, type II (serine/threonine kinase)	NM_001204	521	700	NM_001204-521-700-+
659	BMPR2	bone morphogenetic protein receptor, type II (serine/threonine kinase)	NM_001204	2161	2410	NM_001204-2161-2410-+
682	BSG	basigin (Ok blood group)	NM_001728	151	250	NM_001728-151-250-+
283897	C16orf54	chromosome 16 open reading frame 54	NM_175900	371	490	NM_175900-371-490-+
817	CAMK2D	calcium/calmodulin-dependent protein kinase II delta	NM_001221	1495	1700	NM_001221-1495-1700-+
23589	CARHSP1	calcium regulated heat stable protein 1, 24kDa	NM_001042476	314	420	NM_001042476-314-420-+
10951	CBX1	chromobox homolog 1	NM_006807	461	655	NM_006807-461-655-+
23468	CBX5	chromobox homolog 5	NM_001127322	1491	1650	NM_001127322-1491-1650-+
904	CCNT1	cyclin T1	NM_001240	1041	1591	NM_001240-1041-1591-+
9738	CCP110	centriolar coiled coil protein 110kDa	NM_014711	2431	2550	NM_014711-2431-2550-+
9738	CCP110	centriolar coiled coil protein 110kDa	NM_014711	771	950	NM_014711-771-950-+
25819	CCRN4L	CCR4 carbon catabolite repression 4-like (S. cerevisiae)	NM_012118	841	1040	NM_012118-841-1040-+
23607	CD2AP	CD2-associated protein	NM_012120	401	590	NM_012120-401-590-+
23607	CD2AP	CD2-associated protein	NM_012120	741	970	NM_012120-741-970-+
23607	CD2AP	CD2-associated protein	NM_012120	1591	1780	NM_012120-1591-1780-+
10602	CDC42EP3	CDC42 effector protein (Rho GTPase binding) 3	NM_006449	1890	2238	NM_006449-1890-2238-+
10602	CDC42EP3	CDC42 effector protein (Rho GTPase binding) 3	NM_006449	851	1170	NM_006449-851-1170-+
79577	CDC73	cell division cycle 73	NM_024529	1001	1200	NM_024529-1001-1200-+
79577	CDC73	cell division cycle 73	NM_024529	621	780	NM_024529-621-780-+
1021	CDK6	cyclin-dependent kinase 6	NM_001145306	80	280	NM_001145306-80-280-+
55573	CDV3	CDV3 homolog (mouse)	NM_001134422	731	860	NM_001134422-731-860-+
387119	CEP85L	centrosomal protein 85kDa-like	NM_001042475	2221	2350	NM_001042475-2221-2350-+
22856	CHSY1	chondroitin sulfate synthase 1	NM_014918	2071	2250	NM_014918-2071-2250-+
22856	CHSY1	chondroitin sulfate synthase 1	NM_014918	1861	1990	NM_014918-1861-1990-+
1153	CIRBP	cold inducible RNA binding protein	NM_001300829	451	670	NM_001300829-451-670-+
25932	CLIC4	chloride intracellular channel 4	NM_013943	3000	3200	NM_013943-3000-3200-+
79789	CLMN	calmin (calponin-like, transmembrane)	NM_024734	1371	1900	NM_024734-1371-1900-+
79789	CLMN	calmin (calponin-like, transmembrane)	NM_024734	1911	2122	NM_024734-1911-2122-+
79789	CLMN	calmin (calponin-like, transmembrane)	NM_024734	2321	2520	NM_024734-2321-2520-+
79789	CLMN	calmin (calponin-like, transmembrane)	NM_024734	691	880	NM_024734-691-880-+
79789	CLMN	calmin (calponin-like, transmembrane)	NM_024734	2581	2680	NM_024734-2581-2680-+
79789	CLMN	calmin (calponin-like, transmembrane)	NM_024734	3041	3250	NM_024734-3041-3250-+
11052	CPSF6	cleavage and polyadenylation specific factor 6, 68kDa	NM_001300947	341	510	NM_001300947-341-510-+
153222	CREBRF	CREB3 regulatory factor	NM_153607	431	680	NM_153607-431-680-+
153222	CREBRF	CREB3 regulatory factor	NM_153607	1671	1870	NM_153607-1671-1870-+
1398	CRK	v-crk avian sarcoma virus CT10 oncogene homolog	NM_016823_2	441	590	NM_016823_2-441-590-+
1523	CUX1	cut-like homeobox 1	NM_001202543	1801	1940	NM_001202543-1801-1940-+
54883	CWC25	CWC25 spliceosome-associated protein homolog (S. cerevisiae)	NM_017748	611	750	NM_017748-611-750-+
54165	DCUN1D1	DCN1, defective in cullin neddylation 1, domain containing 1	NM_020640	21	120	NM_020640-21-120-+
80821	DDHD1	DDHD domain containing 1	NM_001160148	1061	1230	NM_001160148-1061-1230-+
55635	DEPDC1	DEP domain containing 1	NM_001114120	2591	2770	NM_001114120-2591-2770-+
1737	DLAT	dihydrolipoamide S-acetyltransferase	NM_001931	1571	1670	NM_001931-1571-1670-+
1738	DLD	dihydrolipoamide dehydrogenase	NM_000108	641	780	NM_000108-641-780-+
79982	DNAJB14	DnaJ (Hsp40) homolog, subfamily B, member 14	NM_001031723	781	910	NM_001031723-781-910-+
134218	DNAJC21	DnaJ (Hsp40) homolog, subfamily C, member 21	NM_194283	801	1190	NM_194283-801-1190-+
134218	DNAJC21	DnaJ (Hsp40) homolog, subfamily C, member 21	NM_194283	1301	1415	NM_194283-1301-1415-+
144132	DNHD1	dynein heavy chain domain 1	NM_144666	11821	11920	NM_144666-11821-11920-+
1829	DSG2	desmoglein 2	NM_001943	1291	1469	NM_001943-1291-1469-+
151636	DTX3L	deltex 3 like, E3 ubiquitin ligase	NM_138287	741	860	NM_138287-741-860-+
151636	DTX3L	deltex 3 like, E3 ubiquitin ligase	NM_138287	2001	2200	NM_138287-2001-2200-+
8661	EIF3A	eukaryotic translation initiation factor 3, subunit A	NM_003750	2811	3020	NM_003750-2811-3020-+
2005	ELK4	ELK4, ETS-domain protein (SRF accessory protein 1)	NM_001973	2364	2812	NM_001973-2364-2812-+
2005	ELK4	ELK4, ETS-domain protein (SRF accessory protein 1)	NM_001973	2851	3030	NM_001973-2851-3030-+
8507	ENC1	ectodermal-neural cortex 1 (with BTB domain)	NM_001256574	1701	1860	NM_001256574-1701-1860-+
8507	ENC1	ectodermal-neural cortex 1 (with BTB domain)	NM_001256574	3233	3430	NM_001256574-3233-3430-+
2029	ENSA	endosulfine alpha	NM_207043	421	627	NM_207043-421-627-+
2029	ENSA	endosulfine alpha	NM_207043	151	320	NM_207043-151-320-+
54749	EPDR1	ependymin related 1	NM_017549	161	260	NM_017549-161-260-+
57471	ERMN	ermin, ERM-like protein	NM_020711	334	510	NM_020711-334-510-+
149371	EXOC8	exocyst complex component 8	NM_175876	1653	2010	NM_175876-1653-2010-+
149371	EXOC8	exocyst complex component 8	NM_175876	881	980	NM_175876-881-980-+
149371	EXOC8	exocyst complex component 8	NM_175876	2031	2230	NM_175876-2031-2230-+
23086	EXPH5	exophilin 5	NM_015065	5961	6120	NM_015065-5961-6120-+
10447	FAM3C	family with sequence similarity 3, member C	NM_014888	481	730	NM_014888-481-730-+
2189	FANCG	Fanconi anemia, complementation group G	NM_004629	2441	2617	NM_004629-2441-2617-+
79791	FBXO31	F-box protein 31	NM_024735	3354	3560	NM_024735-3354-3560-+
26268	FBXO9	F-box protein 9	NM_033480	1561	1712	NM_033480-1561-1712-+
56929	FEM1C	fem-1 homolog c (C. elegans)	NM_020177	401	800	NM_020177-401-800-+
56929	FEM1C	fem-1 homolog c (C. elegans)	NM_020177	161	310	NM_020177-161-310-+
11116	FGFR1OP	FGFR1 oncogene partner	NM_007045	471	830	NM_007045-471-830-+
11116	FGFR1OP	FGFR1 oncogene partner	NM_007045	1531	1640	NM_007045-1531-1640-+
2268	FGR	FGR proto-oncogene, Src family tyrosine kinase	NM_001042747	1841	2030	NM_001042747-1841-2030-+
28982	FLVCR1	feline leukemia virus subgroup C cellular receptor 1	NM_014053	661	810	NM_014053-661-810-+
2332	FMR1	fragile X mental retardation 1	NM_002024	1065	1330	NM_002024-1065-1330-+
2332	FMR1	fragile X mental retardation 1	NM_002024	201	300	NM_002024-201-300-+
79672	FN3KRP	fructosamine 3 kinase related protein	NM_024619	921	1120	NM_024619-921-1120-+
7976	FZD3	frizzled class receptor 3	NM_017412	381	680	NM_017412-381-680-+
55632	G2E3	G2/M-phase specific E3 ubiquitin protein ligase	NM_017769	2921	3040	NM_017769-2921-3040-+
81577	GFOD2	glucose-fructose oxidoreductase domain containing 2	NM_001243650	271	490	NM_001243650-271-490-+
2690	GHR	growth hormone receptor	NM_001242400	1951	2170	NM_001242400-1951-2170-+
2690	GHR	growth hormone receptor	NM_001242400	2321	2420	NM_001242400-2321-2420-+
474344	GIMAP6	GTPase, IMAP family member 6	NM_001244072	801	1030	NM_001244072-801-1030-+
9837	GINS1	GINS complex subunit 1 (Psf1 homolog)	NM_021067	591	790	NM_021067-591-790-+
2739	GLO1	glyoxalase I	NM_006708	31	160	NM_006708-31-160-+
23131	GPATCH8	G patch domain containing 8	NM_001002909	2251	2470	NM_001002909-2251-2470-+
81491	GPR63	G protein-coupled receptor 63	NM_001143957	381	630	NM_001143957-381-630-+
81491	GPR63	G protein-coupled receptor 63	NM_001143957	1341	1550	NM_001143957-1341-1550-+
9402	GRAP2	GRB2-related adaptor protein 2	NM_001291825	1251	1500	NM_001291825-1251-1500-+
2932	GSK3B	glycogen synthase kinase 3 beta	NM_002093	2041	2290	NM_002093-2041-2290-+
9446	GSTO1	glutathione S-transferase omega 1	NM_001191003	911	1043	NM_001191003-911-1043-+
2957	GTF2A1	general transcription factor IIA, 1, 19/37kDa	NM_001278940	631	887	NM_001278940-631-887-+
2960	GTF2E1	general transcription factor IIE, polypeptide 1, alpha 56kDa	NM_005513	221	510	NM_005513-221-510-+
404672	GTF2H5	general transcription factor IIH, polypeptide 5	NM_207118	211	475	NM_207118-211-475-+
55662	HIF1AN	hypoxia inducible factor 1, alpha subunit inhibitor	NM_017902	461	650	NM_017902-461-650-+
3189	HNRNPH3	heterogeneous nuclear ribonucleoprotein H3 (2H9)	NM_012207	51	150	NM_012207-51-150-+
51361	HOOK1	hook microtubule-tethering protein 1	NM_015888	1981	2170	NM_015888-1981-2170-+
50809	HP1BP3	heterochromatin protein 1, binding protein 3	NM_016287	1421	1580	NM_016287-1421-1580-+
3312	HSPA8	heat shock 70kDa protein 8	NM_006597	1151	1300	NM_006597-1151-1300-+
24138	IFIT5	interferon-induced protein with tetratricopeptide repeats 5	NM_012420	371	800	NM_012420-371-800-+
22806	IKZF3	IKAROS family zinc finger 3 (Aiolos)	NM_001284514	101	340	NM_001284514-101-340-+
22806	IKZF3	IKAROS family zinc finger 3 (Aiolos)	NM_001284514	911	1060	NM_001284514-911-1060-+
84289	ING5	inhibitor of growth family, member 5	NM_032329	341	500	NM_032329-341-500-+
54891	INO80D	INO80 complex subunit D	NM_017759	1151	1330	NM_017759-1151-1330-+
3659	IRF1	interferon regulatory factor 1	NM_002198	401	660	NM_002198-401-660-+
126298	IRGQ	immunity-related GTPase family, Q	NM_001007561	1126	1515	NM_001007561-1126-1515-+
23522	KAT6B	K(lysine) acetyltransferase 6B	NM_012330	4891	5100	NM_012330-4891-5100-+
3775	KCNK1	potassium channel, two pore domain subfamily K, member 1	NM_002245	1021	1120	NM_002245-1021-1120-+
23351	KHNYN	KH and NYN domain containing	NM_015299	891	1120	NM_015299-891-1120-+
158405	KIAA1958	KIAA1958	NM_001287036	1981	2390	NM_001287036-1981-2390-+
158405	KIAA1958	KIAA1958	NM_001287036	451	700	NM_001287036-451-700-+
11278	KLF12	Kruppel-like factor 12	NM_007249	301	600	NM_007249-301-600-+
51274	KLF3	Kruppel-like factor 3 (basic)	NM_016531	511	680	NM_016531-511-680-+
54813	KLHL28	kelch-like family member 28	NM_017658	1151	1450	NM_017658-1151-1450-+
54813	KLHL28	kelch-like family member 28	NM_017658	941	1080	NM_017658-941-1080-+
55958	KLHL9	kelch-like family member 9	NM_018847	2351	2470	NM_018847-2351-2470-+
114294	LACTB	lactamase, beta	NM_171846	1091	1193	NM_171846-1091-1193-+
51574	LARP7	La ribonucleoprotein domain family, member 7	NM_001267039	1061	1260	NM_001267039-1061-1260-+
9113	LATS1	large tumor suppressor kinase 1	NM_004690	486	650	NM_004690-486-650-+
9113	LATS1	large tumor suppressor kinase 1	NM_004690	1321	1420	NM_004690-1321-1420-+
9113	LATS1	large tumor suppressor kinase 1	NM_004690	1441	1890	NM_004690-1441-1890-+
9113	LATS1	large tumor suppressor kinase 1	NM_004690	2021	3010	NM_004690-2021-3010-+
3954	LETM1	leucine zipper-EF-hand containing transmembrane protein 1	NM_012318	1901	2220	NM_012318-1901-2220-+
55180	LINS	lines homolog (Drosophila)	NM_001040616	1821	1980	NM_001040616-1821-1980-+
55885	LMO3	LIM domain only 3 (rhombotin-like 2)	NM_018640	971	1210	NM_018640-971-1210-+
23143	LRCH1	leucine-rich repeats and calponin homology (CH) domain containing 1	NM_001164211	2021	2160	NM_001164211-2021-2160-+
84230	LRRC8C	leucine rich repeat containing 8 family, member C	NM_032270	641	800	NM_032270-641-800-+
84230	LRRC8C	leucine rich repeat containing 8 family, member C	NM_032270	1401	1570	NM_032270-1401-1570-+
130576	LYPD6B	LY6/PLAUR domain containing 6B	NM_177964	1011	1298	NM_177964-1011-1298-+
4097	MAFG	v-maf avian musculoaponeurotic fibrosarcoma oncogene homolog G	NM_032711	921	1120	NM_032711-921-1120-+
5601	MAPK9	mitogen-activated protein kinase 9	NM_139068	1321	1430	NM_139068-1321-1430-+
90411	MCFD2	multiple coagulation factor deficiency 2	NM_001171508	531	1040	NM_001171508-531-1040-+
79772	MCTP1	multiple C2 domains, transmembrane 1	NM_024717	2851	3060	NM_024717-2851-3060-+
4194	MDM4	MDM4, p53 regulator	NM_002393	879	1189	NM_002393-879-1189-+
4194	MDM4	MDM4, p53 regulator	NM_002393	532	790	NM_002393-532-790-+
4205	MEF2A	myocyte enhancer factor 2A	NM_001171894	4763	4980	NM_001171894-4763-4980-+
54842	MFSD6	major facilitator superfamily domain containing 6	NM_017694	401	550	NM_017694-401-550-+
4248	MGAT3	mannosyl (beta-1,4-)-glycoprotein beta-1,4-N-acetylglucosaminyltransferase	NM_002409	1701	1800	NM_002409-1701-1800-+
57708	MIER1	mesoderm induction early response 1, transcriptional regulator	NM_001146110	851	1350	NM_001146110-851-1350-+
4289	MKLN1	muskelin 1, intracellular mediator containing kelch motifs	NM_001145354	221	470	NM_001145354-221-470-+
54737	MPHOSPH8	M-phase phosphoprotein 8	NM_017520	211	360	NM_017520-211-360-+
28977	MRPL42	mitochondrial ribosomal protein L42	NM_172177	351	540	NM_172177-351-540-+
56667	MUC13	mucin 13, cell surface associated	NM_033049	1511	1720	NM_033049-1511-1720-+
114803	MYSM1	Myb-like, SWIRM and MPN domains 1	NM_001085487	2926	3100	NM_001085487-2926-3100-+
114803	MYSM1	Myb-like, SWIRM and MPN domains 1	NM_001085487	1381	1500	NM_001085487-1381-1500-+
114803	MYSM1	Myb-like, SWIRM and MPN domains 1	NM_001085487	1521	1640	NM_001085487-1521-1640-+
440145	MZT1	mitotic spindle organizing protein 1	NM_001071775	173	300	NM_001071775-173-300-+
8774	NAPG	N-ethylmaleimide-sensitive factor attachment protein, gamma	NM_003826	491	830	NM_003826-491-830-+
51594	NBAS	neuroblastoma amplified sequence	NM_015909	5851	6010	NM_015909-5851-6010-+
10725	NFAT5	nuclear factor of activated T-cells 5, tonicity-responsive	NM_138714	2337	2840	NM_138714-2337-2840-+
10725	NFAT5	nuclear factor of activated T-cells 5, tonicity-responsive	NM_138714	791	1381	NM_138714-791-1381-+
10725	NFAT5	nuclear factor of activated T-cells 5, tonicity-responsive	NM_138714	18	200	NM_138714-18-200-+
374354	NHLRC2	NHL repeat containing 2	NM_198514	1131	1270	NM_198514-1131-1270-+
81614	NIPA2	non imprinted in Prader-Willi/Angelman syndrome 2	NM_001184889	1491	1690	NM_001184889-1491-1690-+
81614	NIPA2	non imprinted in Prader-Willi/Angelman syndrome 2	NM_001184889	1801	1994	NM_001184889-1801-1994-+
81614	NIPA2	non imprinted in Prader-Willi/Angelman syndrome 2	NM_001184889	1351	1470	NM_001184889-1351-1470-+
28512	NKIRAS1	NFKB inhibitor interacting Ras-like 1	NM_020345	681	966	NM_020345-681-966-+
4863	NPAT	nuclear protein, ataxia-telangiectasia locus	NM_002519	2351	2450	NM_002519-2351-2450-+
26578	OSTF1	osteoclast stimulating factor 1	NM_012383	311	500	NM_012383-311-500-+
5033	P4HA1	prolyl 4-hydroxylase, alpha polypeptide I	NM_001142595	1531	1720	NM_001142595-1531-1720-+
5033	P4HA1	prolyl 4-hydroxylase, alpha polypeptide I	NM_001142595	451	636	NM_001142595-451-636-+
55824	PAG1	phosphoprotein membrane anchor with glycosphingolipid microdomains 1	NM_018440	2701	3046	NM_018440-2701-3046-+
25849	PARM1	prostate androgen-regulated mucin-like protein 1	NM_015393	481	610	NM_015393-481-610-+
79668	PARP8	poly (ADP-ribose) polymerase family, member 8	NM_001178055	2421	2570	NM_001178055-2421-2570-+
83666	PARP9	poly (ADP-ribose) polymerase family, member 9	NM_001146106	271	410	NM_001146106-271-410-+
5108	PCM1	pericentriolar material 1	NM_006197	1528	1720	NM_006197-1528-1720-+
10015	PDCD6IP	programmed cell death 6 interacting protein	NM_001162429	1481	1703	NM_001162429-1481-1703-+
10081	PDCD7	programmed cell death 7	NM_005707	30	150	NM_005707-30-150-+
80012	PHC3	polyhomeotic homolog 3 (Drosophila)	NM_024947	23	230	NM_024947-23-230-+
22822	PHLDA1	pleckstrin homology-like domain, family A, member 1	NM_007350	311	570	NM_007350-311-570-+
5295	PIK3R1	phosphoinositide-3-kinase, regulatory subunit 1 (alpha)	NM_181523	1941	2350	NM_181523-1941-2350-+
5295	PIK3R1	phosphoinositide-3-kinase, regulatory subunit 1 (alpha)	NM_181523	495	950	NM_181523-495-950-+
201164	PLD6	phospholipase D family, member 6	NM_178836	651	880	NM_178836-651-880-+
55041	PLEKHB2	pleckstrin homology domain containing, family B (evectins) member 2	NM_001267062	482	690	NM_001267062-482-690-+
5371	PML	promyelocytic leukemia	NM_033238	68	280	NM_033238-68-280-+
5471	PPAT	phosphoribosyl pyrophosphate amidotransferase	NM_002703	77	300	NM_002703-77-300-+
53938	PPIL3	peptidylprolyl isomerase (cyclophilin)-like 3	NM_032472	601	850	NM_032472-601-850-+
5494	PPM1A	protein phosphatase, Mg2+/Mn2+ dependent, 1A	NM_021003	1541	1640	NM_021003-1541-1640-+
5494	PPM1A	protein phosphatase, Mg2+/Mn2+ dependent, 1A	NM_021003	1351	1540	NM_021003-1351-1540-+
152926	PPM1K	protein phosphatase, Mg2+/Mn2+ dependent, 1K	NM_152542	1201	1350	NM_152542-1201-1350-+
152926	PPM1K	protein phosphatase, Mg2+/Mn2+ dependent, 1K	NM_152542	771	930	NM_152542-771-930-+
10935	PRDX3	peroxiredoxin 3	NM_006793	761	890	NM_006793-761-890-+
5724	PTAFR	platelet-activating factor receptor	NM_001164723	811	920	NM_001164723-811-920-+
5781	PTPN11	protein tyrosine phosphatase, non-receptor type 11	NM_002834	1031	1290	NM_002834-1031-1290-+
5813	PURA	purine-rich element binding protein A	NM_005859	1	120	NM_005859-1-120-+
9444	QKI	QKI, KH domain containing, RNA binding	NM_206855	681	830	NM_206855-681-830-+
9444	QKI	QKI, KH domain containing, RNA binding	NM_206855	911	1170	NM_206855-911-1170-+
10111	RAD50	RAD50 homolog (S. cerevisiae)	NM_005732	1241	1450	NM_005732-1241-1450-+
55544	RBM38	RNA binding motif protein 38	NM_001291780	2241	2418	NM_001291780-2241-2418-+
3516	RBPJ	recombination signal binding protein for immunoglobulin kappa J region	NM_203284	601	790	NM_203284-601-790-+
3516	RBPJ	recombination signal binding protein for immunoglobulin kappa J region	NM_203284	1231	1530	NM_203284-1231-1530-+
3516	RBPJ	recombination signal binding protein for immunoglobulin kappa J region	NM_203284	393	570	NM_203284-393-570-+
149041	RC3H1	ring finger and CCCH-type domains 1	NM_001300850	2251	2350	NM_001300850-2251-2350-+
5962	RDX	radixin	NM_002906	241	340	NM_002906-241-340-+
399	RHOH	ras homolog family member H	NM_001278359	771	990	NM_001278359-771-990-+
165918	RNF168	ring finger protein 168, E3 ubiquitin protein ligase	NM_152617	1031	1150	NM_152617-1031-1150-+
6091	ROBO1	roundabout, axon guidance receptor, homolog 1 (Drosophila)	NM_133631	5691	5840	NM_133631-5691-5840-+
6198	RPS6KB1	ribosomal protein S6 kinase, 70kDa, polypeptide 1	NM_001272044	369	700	NM_001272044-369-700-+
51018	RRP15	ribosomal RNA processing 15 homolog (S. cerevisiae)	NM_016052	312	1015	NM_016052-312-1015-+
79685	SAP30L	SAP30-like	NM_024632	1131	1276	NM_024632-1131-1276-+
55206	SBNO1	strawberry notch homolog 1 (Drosophila)	NM_001167856	3401	3550	NM_001167856-3401-3550-+
60592	SCOC	short coiled-coil protein	NM_001153585	891	1040	NM_001153585-891-1040-+
10807	SDCCAG3	serologically defined colon cancer antigen 3	NM_001039707	851	1090	NM_001039707-851-1090-+
11231	SEC63	SEC63 homolog (S. cerevisiae)	NM_007214	121	300	NM_007214-121-300-+
9792	SERTAD2	SERTA domain containing 2	NM_014755	731	1622	NM_014755-731-1622-+
23064	SETX	senataxin	NM_015046	2201	2420	NM_015046-2201-2420-+
6452	SH3BP2	SH3-domain binding protein 2	NM_001145855	871	1470	NM_001145855-871-1470-+
51100	SH3GLB1	SH3-domain GRB2-like endophilin B1	NM_001206651	401	640	NM_001206651-401-640-+
6558	SLC12A2	solute carrier family 12 (sodium/potassium/chloride transporter), member 2	NM_001046	3521	3650	NM_001046-3521-3650-+
6547	SLC8A3	solute carrier family 8 (sodium/calcium exchanger), member 3	NM_183002	1861	2090	NM_183002-1861-2090-+
6547	SLC8A3	solute carrier family 8 (sodium/calcium exchanger), member 3	NM_183002	1721	1820	NM_183002-1721-1820-+
146857	SLFN13	schlafen family member 13	NM_144682	3111	3220	NM_144682-3111-3220-+
162394	SLFN5	schlafen family member 5	NM_144975	131	320	NM_144975-131-320-+
8243	SMC1A	structural maintenance of chromosomes 1A	NM_001281463	751	1760	NM_001281463-751-1760-+
8243	SMC1A	structural maintenance of chromosomes 1A	NM_001281463	2481	3020	NM_001281463-2481-3020-+
8243	SMC1A	structural maintenance of chromosomes 1A	NM_001281463	2202	2410	NM_001281463-2202-2410-+
10592	SMC2	structural maintenance of chromosomes 2	NM_001042550	3251	3455	NM_001042550-3251-3455-+
23137	SMC5	structural maintenance of chromosomes 5	NM_015110	2581	2700	NM_015110-2581-2700-+
23583	SMUG1	single-strand-selective monofunctional uracil-DNA glycosylase 1	NM_014311	861	1150	NM_014311-861-1150-+
79753	SNIP1	Smad nuclear interacting protein 1	NM_024700	66	240	NM_024700-66-240-+
6670	SP3	Sp3 transcription factor	NM_003111	2461	2620	NM_003111-2461-2620-+
6671	SP4	Sp4 transcription factor	NM_003112	291	490	NM_003112-291-490-+
6671	SP4	Sp4 transcription factor	NM_003112	1471	1630	NM_003112-1471-1630-+
92521	SPECC1	sperm antigen with calponin homology and coiled-coil domains 1	NM_152904	561	760	NM_152904-561-760-+
139886	SPIN4	spindlin family, member 4	NM_001012968	691	1180	NM_001012968-691-1180-+
6693	SPN	sialophorin	NM_001030288	261	420	NM_001030288-261-420-+
6693	SPN	sialophorin	NM_001030288	471	1154	NM_001030288-471-1154-+
10494	STK25	serine/threonine kinase 25	NM_001271977	1591	1750	NM_001271977-1591-1750-+
10228	STX6	syntaxin 6	NM_005819	741	900	NM_005819-741-900-+
23512	SUZ12	SUZ12 polycomb repressive complex 2 subunit	NM_015355	921	1250	NM_015355-921-1250-+
23512	SUZ12	SUZ12 polycomb repressive complex 2 subunit	NM_015355	759	870	NM_015355-759-870-+
10492	SYNCRIP	synaptotagmin binding, cytoplasmic RNA interacting protein	NM_001159677	1621	1900	NM_001159677-1621-1900-+
10492	SYNCRIP	synaptotagmin binding, cytoplasmic RNA interacting protein	NM_001159677	1331	1590	NM_001159677-1331-1590-+
9338	TCEAL1	transcription elongation factor A (SII)-like 1	NM_004780	421	640	NM_004780-421-640-+
6950	TCP1	t-complex 1	NM_030752	1181	1300	NM_030752-1181-1300-+
10618	TGOLN2	trans-golgi network protein 2	NM_001206840	433	980	NM_001206840-433-980-+
10618	TGOLN2	trans-golgi network protein 2	NM_001206840	1226	1520	NM_001206840-1226-1520-+
9874	TLK1	tousled-like kinase 1	NM_012290	1181	1350	NM_012290-1181-1350-+
7112	TMPO	thymopoietin	NM_001032283	1201	1450	NM_001032283-1201-1450-+
163590	TOR1AIP2	torsin A interacting protein 2	NM_001199260	1919	2218	NM_001199260-1919-2218-+
7187	TRAF3	TNF receptor-associated factor 3	NM_145725	541	660	NM_145725-541-660-+
55809	TRERF1	transcriptional regulating factor 1	NM_001297573	481	750	NM_001297573-481-750-+
10475	TRIM38	tripartite motif containing 38	NM_006355	144	280	NM_006355-144-280-+
7329	UBE2I	ubiquitin-conjugating enzyme E2I	NM_194259	741	942	NM_194259-741-942-+
56893	UBQLN4	ubiquilin 4	NM_020131	1531	1660	NM_020131-1531-1660-+
55148	UBR7	ubiquitin protein ligase E3 component n-recognin 7 (putative)	NM_175748	1626	1800	NM_175748-1626-1800-+
92181	UBTD2	ubiquitin domain containing 2	NM_152277	201	911	NM_152277-201-911-+
92181	UBTD2	ubiquitin domain containing 2	NM_152277	920	1200	NM_152277-920-1200-+
51569	UFM1	ubiquitin-fold modifier 1	NM_001286706	81	180	NM_001286706-81-180-+
8975	USP13	ubiquitin specific peptidase 13 (isopeptidase T-3)	NM_003940	2541	2720	NM_003940-2541-2720-+
51118	UTP11L	UTP11-like, U3 small nucleolar ribonucleoprotein (yeast)	NM_016037	541	800	NM_016037-541-800-+
7716	VEZF1	vascular endothelial zinc finger 1	NM_007146	1601	1730	NM_007146-1601-1730-+
27072	VPS41	vacuolar protein sorting 41 homolog (S. cerevisiae)	NM_014396	2911	3551	NM_014396-2911-3551-+
51534	VTA1	vesicle (multivesicular body) trafficking 1	NM_016485	531	670	NM_016485-531-670-+
51534	VTA1	vesicle (multivesicular body) trafficking 1	NM_016485	231	330	NM_016485-231-330-+
134430	WDR36	WD repeat domain 36	NM_139281	2391	2568	NM_139281-2391-2568-+
112840	WDR89	WD repeat domain 89	NM_001258272	881	1110	NM_001258272-881-1110-+
112840	WDR89	WD repeat domain 89	NM_001258272	1392	1760	NM_001258272-1392-1760-+
151525	WDSUB1	WD repeat, sterile alpha motif and U-box domain containing 1	NM_001128213	1561	1680	NM_001128213-1561-1680-+
25937	WWTR1	WW domain containing transcription regulator 1	NM_015472	1341	1580	NM_015472-1341-1580-+
7529	YWHAB	tyrosine 3-monooxygenase/tryptophan 5-monooxygenase activation protein, beta	NM_003404	124	291	NM_003404-124-291-+
85463	ZC3H12C	zinc finger CCCH-type containing 12C	NM_033390	8251	8380	NM_033390-8251-8380-+
376940	ZC3H6	zinc finger CCCH-type containing 6	NM_198581	3521	3750	NM_198581-3521-3750-+
376940	ZC3H6	zinc finger CCCH-type containing 6	NM_198581	381	620	NM_198581-381-620-+
6935	ZEB1	zinc finger E-box binding homeobox 1	NM_001128128	561	700	NM_001128128-561-700-+
23051	ZHX3	zinc fingers and homeoboxes 3	NM_015035	2541	2720	NM_015035-2541-2720-+
7586	ZKSCAN1	zinc finger with KRAB and SCAN domains 1	NM_001287054	1541	1770	NM_001287054-1541-1770-+
64393	ZMAT3	zinc finger, matrin-type 3	NM_152240	1166	1314	NM_152240-1166-1314-+
163227	ZNF100	zinc finger protein 100	NM_173531	1551	1900	NM_173531-1551-1900-+
7572	ZNF24	zinc finger protein 24	NM_006965	361	870	NM_006965-361-870-+
9422	ZNF264	zinc finger protein 264	NM_003417	1751	1950	NM_003417-1751-1950-+
55422	ZNF331	zinc finger protein 331	NM_018555	1911	2280	NM_018555-1911-2280-+
353274	ZNF445	zinc finger protein 445	NM_181489	3171	3600	NM_181489-3171-3600-+
93134	ZNF561	zinc finger protein 561	NM_152289	1026	1380	NM_152289-1026-1380-+
93134	ZNF561	zinc finger protein 561	NM_152289	471	760	NM_152289-471-760-+
9640	ZNF592	zinc finger protein 592	NM_014630	2301	2470	NM_014630-2301-2470-+
51193	ZNF639	zinc finger protein 639	NM_016331	805	1622	NM_016331-805-1622-+
728927	ZNF736	zinc finger protein 736	NM_001170905	471	1723	NM_001170905-471-1723-+
7637	ZNF84	zinc finger protein 84	NM_001289972	1951	2150	NM_001289972-1951-2150-+
7637	ZNF84	zinc finger protein 84	NM_001289972	2491	2670	NM_001289972-2491-2670-+
168374	ZNF92	zinc finger protein 92	NM_001287533	2041	2220	NM_001287533-2041-2220-+
146050	ZSCAN29	zinc finger and SCAN domain containing 29	NM_152455	1441	1570	NM_152455-1441-1570-+
146050	ZSCAN29	zinc finger and SCAN domain containing 29	NM_152455	1891	2090	NM_152455-1891-2090-+
