# Supplementary material for: Evolution of transcript modification by N6-methyladenosine in primates
Source: HighWire-hosted journal article supplement (doi:10.1101/gr.212563.116), 2017-01-04
Supplement: Supplemental_Table_S11.xlsx [file Supplemental_Table_S11.xlsx]

## Sheet: sTable11.HumanLossPeaks
Gid	Symbol	Description	Refseq_NM	Start	End	PeakName
90378	SAMD1	sterile alpha motif domain containing 1	NM_138352	868	1075	ENSPTRT00000019510-193-400-+
604	BCL6	B-cell CLL/lymphoma 6	NM_001130845	1473	1782	ENSPTRT00000029314-1381-1690-+
27294	DHDH	dihydrodiol dehydrogenase (dimeric)	NM_014475	951	1069	ENSPTRT00000020926-951-1069-+
8518	IKBKAP	inhibitor of kappa light polypeptide gene enhancer in B-cells, kinase complex-associated protein	NM_003640	4550	4784	ENSPTRT00000039255-2671-2905-+
3014	H2AFX	H2A histone family, member X	NM_002105	324	435	ENSPTRT00000008110-251-363-+
90	ACVR1	activin A receptor, type I	NM_001105	1962	2280	ENSPTRT00000023267-1962-2280-+
84255	SLC37A3	solute carrier family 37, member 3	NM_207113	1577	1686	ENSPTRT00000036618-1521-1630-+
30850	CDR2L	cerebellar degeneration-related protein 2-like	NM_014603	1491	1780	ENSPTRT00000017659-1491-1780-+
254428	SLC41A1	solute carrier family 41 (magnesium transporter), member 1	NM_173854	895	994	ENSPTRT00000003469-931-1030-+
9583	ENTPD4	ectonucleoside triphosphate diphosphohydrolase 4	NM_004901	495	654	ENSPTRT00000037204-491-650-+
56647	BCCIP	BRCA2 and CDKN1A interacting protein	NM_078469	42	240	ENSPTRT00000005794-42-240-+
1954	MEGF8	multiple EGF-like-domains 8	NM_001271938	8314	8468	ENSPTRT00000020538-8311-8465-+
54469	ZFAND6	zinc finger, AN1-type domain 6	NM_019006	1132	1169	ENSPTRT00000013572-1021-1240-+
3156	HMGCR	3-hydroxy-3-methylglutaryl-CoA reductase	NM_000859	3108	3387	ENSPTRT00000031507-3111-3390-+
7082	TJP1	tight junction protein 1	NM_003257	3531	3820	ENSPTRT00000012641-3531-3820-+
54542	RC3H2	ring finger and CCCH-type domains 2	NM_001100588	2801	2910	ENSPTRT00000039465-2801-2910-+
489	ATP2A3	ATPase, Ca++ transporting, ubiquitous	NM_174953	1968	2137	ENSPTRT00000043535-1621-1790-+
9689	BZW1	basic leucine zipper and W2 domains 1	NM_001207067	2291	2388	ENSPTRT00000023699-1931-2030-+
8502	PKP4	plakophilin 4	NM_003628	1062	1181	ENSPTRT00000023278-821-940-+
6503	SLA	Src-like-adaptor	NM_001045556	1915	2054	ENSPTRT00000038101-1281-1420-+
10059	DNM1L	dynamin 1-like	NM_001278464	2013	2152	ENSPTRT00000057295-1561-1700-+
55833	UBAP2	ubiquitin associated protein 2	NM_018449	3372	3481	ENSPTRT00000047885-3361-3470-+
54531	MIER2	mesoderm induction early response 1, family member 2	NM_017550	1380	1529	ENSPTRT00000018604-1011-1160-+
80347	COASY	CoA synthase	NM_025233	560	699	ENSPTRT00000016939-301-440-+
1465	CSRP1	cysteine and glycine-rich protein 1	NM_001193571	213	316	ENSPTRT00000003335-171-290-+
84641	HIATL1	hippocampus abundant transcript-like 1	NM_032558	1364	1513	ENSPTRT00000039089-891-1040-+
3620	IDO1	indoleamine 2,3-dioxygenase 1	NM_002164	1071	1385	ENSPTRT00000037404-1596-1910-+
55968	NSFL1C	NSFL1 (p97) cofactor (p47)	NM_001206736	2069	2243	ENSPTRT00000059341-2061-2235-+
254427	PROSER2	proline and serine rich 2	NM_153256	831	936	ENSPTRT00000057905-831-936-+
1777	DNASE2	deoxyribonuclease II, lysosomal	NM_001375	917	1156	ENSPTRT00000019450-771-1010-+
